# Supplementary material for: PI3K signaling specifies proximal-distal fate by driving a developmental gene regulatory network in SOX9+ mouse lung progenitors
Source: eLife. 2022 Aug 17;11:e67954. doi: 10.7554/eLife.67954 (PMC9427112; doi:10.7554/eLife.67954)
Supplement: Supplementary file 1. [file elife-67954-supp1.xlsx]

## Sheet: Sheet1
Supplemental File 1. Differentially Expressed Genes
gene_id	symbol	entrez_id	description	logFC	AveExpr	t	P.Value	adj.P.Val	B
ENSMUSG00000022097	Sftpc	20389	surfactant associated protein C	3.98781	9.59404	84.2573	2.07191e-14	3.18142e-10	23.4565
ENSMUSG00000032359	Ctsh	13036	cathepsin H	7.37685	6.24654	48.7964	2.86932e-12	2.20292e-08	17.5813
ENSMUSG00000025810	Nrp1	18186	neuropilin 1	3.7864	6.08774	42.8617	9.23074e-12	3.54345e-08	17.4957
ENSMUSG00000024659	Anxa1	16952	annexin A1	4.67051	6.43484	43.7471	7.67817e-12	3.54345e-08	17.6423
ENSMUSG00000030560	Ctsc	13032	cathepsin C	2.76674	7.57729	39.3014	2.01498e-11	3.82173e-08	17.0491
ENSMUSG00000026576	Atp1b1	11931	ATPase, Na+/K+ transporting, beta 1 polypeptide	3.0722	6.72445	41.0034	1.37582e-11	3.82173e-08	17.347
ENSMUSG00000042784	Muc1	17829	mucin 1, transmembrane	3.35742	7.00896	39.5492	1.90419e-11	3.82173e-08	17.0643
ENSMUSG00000034127	Tspan8	216350	tetraspanin 8	4.06954	5.90314	38.8416	2.24003e-11	3.82173e-08	16.6486
ENSMUSG00000000402	Egfl6	54156	EGF-like-domain, multiple 6	4.51829	6.9853	39.9034	1.75734e-11	3.82173e-08	17.0806
ENSMUSG00000072235	Tuba1a	22142	tubulin, alpha 1A	-2.5549	8.70721	-36.9015	3.55148e-11	4.22853e-08	16.4745
ENSMUSG00000030342	Cd9	12527	CD9 antigen	2.34166	7.22855	37.3601	3.17816e-11	4.22853e-08	16.5958
ENSMUSG00000022037	Clu	12759	clusterin	3.07552	8.48957	36.8687	3.58e-11	4.22853e-08	16.4732
ENSMUSG00000027562	Car2	12349	carbonic anhydrase 2	3.75582	6.54263	37.8428	2.83158e-11	4.22853e-08	16.6182
ENSMUSG00000067276	Capn6	12338	calpain 6	-1.89554	9.18951	-36.5426	3.87772e-11	4.25303e-08	16.3647
ENSMUSG00000020057	Dram1	71712	DNA-damage regulated autophagy modulator 1	4.8883	6.65043	35.8491	4.60661e-11	4.53929e-08	16.1144
ENSMUSG00000022505	Emp2	13731	epithelial membrane protein 2	4.90547	6.50135	35.5035	5.02559e-11	4.53929e-08	16.0051
ENSMUSG00000040653	Ppp1r14c	76142	protein phosphatase 1, regulatory (inhibitor) subunit 14c	5.6615	5.62024	35.7051	4.77632e-11	4.53929e-08	15.6813
ENSMUSG00000030208	Emp1	13730	epithelial membrane protein 1	3.308	6.42403	35.1459	5.50428e-11	4.69546e-08	16.0035
ENSMUSG00000032473	Cldn18	56492	claudin 18	3.08056	8.26669	34.2964	6.85758e-11	5.14599e-08	15.8158
ENSMUSG00000033595	Lgi3	213469	leucine-rich repeat LGI family, member 3	3.428	7.54938	34.1975	7.03782e-11	5.14599e-08	15.8061
ENSMUSG00000000058	Cav2	12390	caveolin 2	3.57472	5.27573	34.5769	6.37381e-11	5.14599e-08	15.6273
ENSMUSG00000024538	Ppic	19038	peptidylprolyl isomerase C	1.68851	7.76444	32.4519	1.12659e-10	6.9195e-08	15.3159
ENSMUSG00000053897	Slc39a8	67547	solute carrier family 39 (metal ion transporter), member 8	3.04322	6.2227	32.5426	1.09872e-10	6.9195e-08	15.335
ENSMUSG00000053886	Sh2d4a	72281	SH2 domain containing 4A	3.22325	4.9033	32.4531	1.12623e-10	6.9195e-08	15.0712
ENSMUSG00000068874	Selenbp1	20341	selenium binding protein 1	4.53847	5.6871	32.8251	1.01668e-10	6.9195e-08	15.2279
ENSMUSG00000037568	Vash2	226841	vasohibin 2	-2.72578	5.67951	-31.8437	1.33508e-10	7.09191e-08	15.0994
ENSMUSG00000061393	Acvr2b	11481	activin receptor IIB	-2.47127	5.73675	-31.0742	1.66271e-10	7.09191e-08	14.9085
ENSMUSG00000042978	Sbk1	104175	SH3-binding kinase 1	-1.75212	8.10294	-31.1197	1.64103e-10	7.09191e-08	14.9154
ENSMUSG00000000631	Myo18a	360013	myosin XVIIIA	1.62207	7.18907	31.3784	1.52356e-10	7.09191e-08	15.0239
ENSMUSG00000032231	Anxa2	12306	annexin A2	2.00303	8.40538	31.2224	1.59324e-10	7.09191e-08	14.9316
ENSMUSG00000004665	Cnn2	12798	calponin 2	2.25049	7.11944	31.6005	1.43014e-10	7.09191e-08	15.0929
ENSMUSG00000029186	Pi4k2b	67073	phosphatidylinositol 4-kinase type 2 beta	2.25868	6.72425	31.5184	1.46392e-10	7.09191e-08	15.0752
ENSMUSG00000020911	Krt19	16669	keratin 19	2.27307	7.16269	31.2709	1.57121e-10	7.09191e-08	14.9965
ENSMUSG00000046213	Cym	229697	chymosin	3.52138	6.3446	31.2103	1.59876e-10	7.09191e-08	14.9698
ENSMUSG00000015452	Ager	11596	advanced glycosylation end product-specific receptor	3.94141	7.11308	32.1841	1.21358e-10	7.09191e-08	15.2618
ENSMUSG00000074457	S100a16	67860	S100 calcium binding protein A16	4.37353	4.17501	31.6071	1.42746e-10	7.09191e-08	14.443
ENSMUSG00000021701	Plk2	20620	polo-like kinase 2	2.04799	7.24814	30.458	1.98988e-10	8.25801e-08	14.7514
ENSMUSG00000018340	Anxa6	11749	annexin A6	1.7092	7.88108	30.2814	2.09635e-10	8.4709e-08	14.67
ENSMUSG00000049775	Tmsb4x	19241	thymosin, beta 4, X chromosome	1.56236	9.14095	29.806	2.41588e-10	9.51174e-08	14.4486
ENSMUSG00000031383	Dusp9	75590	dual specificity phosphatase 9	-2.14021	6.00136	-29.419	2.71607e-10	9.86453e-08	14.455
ENSMUSG00000024940	Ltbp3	16998	latent transforming growth factor beta binding protein 3	2.62569	5.95529	29.4092	2.72422e-10	9.86453e-08	14.4478
ENSMUSG00000009772	Nuak2	74137	NUAK family, SNF1-like kinase, 2	2.66597	5.25093	29.3635	2.76245e-10	9.86453e-08	14.3757
ENSMUSG00000061288	Taok3	330177	TAO kinase 3	3.6995	5.08801	29.3726	2.75478e-10	9.86453e-08	14.2862
ENSMUSG00000018451	6330403K07Rik	NA	RIKEN cDNA 6330403K07 gene	-3.9206	4.78654	-29.238	2.87049e-10	9.88649e-08	14.1395
ENSMUSG00000037685	Atp8a1	11980	ATPase, aminophospholipid transporter (APLT), class I, type 8A, member 1	1.82081	7.80721	29.0929	3.0013e-10	9.88649e-08	14.3011
ENSMUSG00000027803	Wwtr1	97064	WW domain containing transcription regulator 1	2.69787	5.74297	29.1648	2.93566e-10	9.88649e-08	14.3632
ENSMUSG00000020044	Timp3	21859	tissue inhibitor of metalloproteinase 3	2.90975	6.08016	29.0662	3.02615e-10	9.88649e-08	14.3457
ENSMUSG00000034675	Dbn1	56320	drebrin 1	-2.39737	6.80389	-28.817	3.26875e-10	1.04566e-07	14.2644
ENSMUSG00000041992	Rapgef5	217944	Rap guanine nucleotide exchange factor (GEF) 5	2.86999	4.40356	28.6166	3.47966e-10	1.09041e-07	13.9941
ENSMUSG00000052727	Map1b	17755	microtubule-associated protein 1B	-3.60092	5.23295	-28.4168	3.70495e-10	1.13779e-07	14.0368
ENSMUSG00000004044	Ptrf	19285	polymerase I and transcript release factor	5.542	4.11042	28.2832	3.86466e-10	1.16357e-07	13.4012
ENSMUSG00000054200	Ffar4	107221	free fatty acid receptor 4	-3.94277	3.48283	-28.0393	4.17626e-10	1.2332e-07	13.3227
ENSMUSG00000029994	Anxa4	11746	annexin A4	1.64647	7.90007	27.9555	4.28966e-10	1.24245e-07	13.9215
ENSMUSG00000036661	Dennd3	105841	DENN/MADD domain containing 3	2.64678	5.43682	27.898	4.3694e-10	1.24245e-07	13.96
ENSMUSG00000033386	Frrs1	20321	ferric-chelate reductase 1	-3.5742	3.99732	-27.7303	4.61174e-10	1.2497e-07	13.5401
ENSMUSG00000020086	H2afy2	404634	H2A histone family, member Y2	-1.50939	7.33468	-27.7535	4.57737e-10	1.2497e-07	13.8853
ENSMUSG00000039865	Slc44a3	213603	solute carrier family 44, member 3	2.89581	4.87828	27.712	4.63906e-10	1.2497e-07	13.8291
ENSMUSG00000015839	Nfe2l2	18024	nuclear factor, erythroid derived 2, like 2	1.52961	7.4029	27.4558	5.04115e-10	1.3346e-07	13.7798
ENSMUSG00000022483	Col2a1	12824	collagen, type II, alpha 1	-2.99708	7.90131	-27.2689	5.35885e-10	1.37142e-07	13.7045
ENSMUSG00000049690	Nckap5	210356	NCK-associated protein 5	2.84046	6.37515	27.3117	5.2843e-10	1.37142e-07	13.7916
ENSMUSG00000026879	Gsn	227753	gelsolin	5.00304	5.31449	27.1402	5.59057e-10	1.40727e-07	13.5904
ENSMUSG00000027375	Mal	17153	myelin and lymphocyte protein, T cell differentiation protein	2.60245	5.10538	27.0105	5.83529e-10	1.44517e-07	13.6561
ENSMUSG00000021187	Tc2n	74413	tandem C2 domains, nuclear	2.99323	4.32434	26.8	6.2584e-10	1.52536e-07	13.449
ENSMUSG00000066705	Fxyd6	59095	FXYD domain-containing ion transport regulator 6	-2.85329	5.32702	-26.6778	6.51946e-10	1.5401e-07	13.5556
ENSMUSG00000024640	Psat1	107272	phosphoserine aminotransferase 1	1.71351	7.96752	26.6806	6.51334e-10	1.5401e-07	13.4787
ENSMUSG00000037169	Mycn	18109	v-myc avian myelocytomatosis viral related oncogene, neuroblastoma derived	-1.511	7.5863	-26.5698	6.76033e-10	1.5728e-07	13.4637
ENSMUSG00000031881	Cdh16	12556	cadherin 16	1.80345	7.10684	26.4164	7.11938e-10	1.63161e-07	13.4387
ENSMUSG00000025577	Cbx2	12416	chromobox 2	-1.70424	7.35734	-26.2642	7.49691e-10	1.6531e-07	13.371
ENSMUSG00000002980	Bcam	57278	basal cell adhesion molecule	1.80432	8.64081	26.3247	7.34437e-10	1.6531e-07	13.3051
ENSMUSG00000036585	Fgf1	14164	fibroblast growth factor 1	5.24139	5.04679	26.2489	7.53613e-10	1.6531e-07	13.2453
ENSMUSG00000024130	Abca3	27410	ATP-binding cassette, sub-family A (ABC1), member 3	2.81505	7.24364	26.1522	7.78896e-10	1.65557e-07	13.3509
ENSMUSG00000028716	Pdzk1ip1	67182	PDZK1 interacting protein 1	3.16455	3.85526	26.1888	7.6922e-10	1.65557e-07	13.1356
ENSMUSG00000059325	Hopx	74318	HOP homeobox	4.63342	5.20509	26.1216	7.87085e-10	1.65557e-07	13.289
ENSMUSG00000023495	Pcbp4	59092	poly(rC) binding protein 4	-1.38168	7.47814	-25.7062	9.08321e-10	1.73236e-07	13.1592
ENSMUSG00000032220	Myo1e	71602	myosin IE	1.55685	7.12484	25.8042	8.77948e-10	1.73236e-07	13.2164
ENSMUSG00000032047	Acat1	110446	acetyl-Coenzyme A acetyltransferase 1	1.79044	6.85432	25.8374	8.67913e-10	1.73236e-07	13.2474
ENSMUSG00000031402	Mpp1	17524	membrane protein, palmitoylated	1.88001	5.74207	25.5909	9.45532e-10	1.73236e-07	13.212
ENSMUSG00000026664	Phyh	16922	phytanoyl-CoA hydroxylase	1.91334	6.18587	25.8972	8.50183e-10	1.73236e-07	13.306
ENSMUSG00000056737	Capg	12332	capping protein (actin filament), gelsolin-like	2.34734	5.38236	25.5645	9.54302e-10	1.73236e-07	13.2017
ENSMUSG00000040488	Ltbp4	108075	latent transforming growth factor beta binding protein 4	2.82566	4.65301	25.6487	9.26676e-10	1.73236e-07	13.1597
ENSMUSG00000036368	Rmdn2	381110	regulator of microtubule dynamics 2	3.18216	4.26467	25.5171	9.70255e-10	1.73236e-07	13.0317
ENSMUSG00000024664	Fads3	60527	fatty acid desaturase 3	3.21993	6.60262	25.5191	9.69576e-10	1.73236e-07	13.1713
ENSMUSG00000001943	Vsig2	57276	V-set and immunoglobulin domain containing 2	3.79545	4.52911	25.6511	9.25892e-10	1.73236e-07	13.0811
ENSMUSG00000040147	Maob	109731	monoamine oxidase B	4.47684	5.00211	25.6862	9.14636e-10	1.73236e-07	13.128
ENSMUSG00000020788	Atp2a3	53313	ATPase, Ca++ transporting, ubiquitous	6.24551	3.75157	25.81	8.76183e-10	1.73236e-07	12.4008
ENSMUSG00000029829	Tmem213	77522	transmembrane protein 213	6.51313	2.14805	25.6825	9.15831e-10	1.73236e-07	11.022
ENSMUSG00000001270	Ckb	12709	creatine kinase, brain	-3.12228	6.01241	-25.3488	1.02933e-09	1.79607e-07	13.1294
ENSMUSG00000035311	Gnptab	432486	N-acetylglucosamine-1-phosphate transferase, alpha and beta subunits	1.63088	6.84599	25.3641	1.02381e-09	1.79607e-07	13.074
ENSMUSG00000015093	Clic3	69454	chloride intracellular channel 3	6.53957	3.84818	25.2596	1.06224e-09	1.83266e-07	12.2475
ENSMUSG00000022799	Arhgap31	12549	Rho GTPase activating protein 31	3.25105	4.62208	25.0368	1.14972e-09	1.96156e-07	12.9353
ENSMUSG00000022456	2017-09-03	24050	septin 3	-4.18461	4.11429	-24.9344	1.19257e-09	2.01231e-07	12.7016
ENSMUSG00000025026	Add3	27360	adducin 3 (gamma)	-1.31574	8.58656	-24.7643	1.26773e-09	2.11587e-07	12.7256
ENSMUSG00000052485	Tmem171	380863	transmembrane protein 171	2.28834	5.00008	24.7044	1.29543e-09	2.11609e-07	12.8888
ENSMUSG00000017009	Sdc4	20971	syndecan 4	2.42326	6.83977	24.7225	1.28695e-09	2.11609e-07	12.8482
ENSMUSG00000019368	Sec14l4	103655	SEC14-like lipid binding 4	3.56545	4.92497	24.5993	1.34566e-09	2.17502e-07	12.8108
ENSMUSG00000039450	Dcxr	67880	dicarbonyl L-xylulose reductase	2.02611	5.04903	24.4906	1.39988e-09	2.23909e-07	12.8182
ENSMUSG00000074637	Sox2	20674	SRY (sex determining region Y)-box 2	-2.94762	3.7269	-24.3365	1.48099e-09	2.32061e-07	12.5369
ENSMUSG00000021094	Dhrs7	66375	dehydrogenase/reductase (SDR family) member 7	4.70363	4.5225	24.3364	1.48108e-09	2.32061e-07	12.5838
ENSMUSG00000029168	Dpysl5	65254	dihydropyrimidinase-like 5	-3.15943	5.87509	-24.2967	1.50279e-09	2.33085e-07	12.7519
ENSMUSG00000022108	Itm2b	16432	integral membrane protein 2B	1.23351	8.85382	24.1789	1.56941e-09	2.37582e-07	12.4743
ENSMUSG00000019851	Perp	64058	PERP, TP53 apoptosis effector	2.58062	5.31119	24.1637	1.57821e-09	2.37582e-07	12.7022
ENSMUSG00000042745	Id1	15901	inhibitor of DNA binding 1	2.67893	5.64289	24.2088	1.55216e-09	2.37582e-07	12.7193
ENSMUSG00000041817	Fam169a	320557	family with sequence similarity 169, member A	-2.95103	4.11552	-24.0882	1.62289e-09	2.41345e-07	12.5417
ENSMUSG00000022090	Pdlim2	213019	PDZ and LIM domain 2	4.08627	4.2611	24.0429	1.65035e-09	2.41345e-07	12.4884
ENSMUSG00000047250	Ptgs1	19224	prostaglandin-endoperoxide synthase 1	7.77425	3.41108	24.0604	1.63971e-09	2.41345e-07	11.2555
ENSMUSG00000028967	Errfi1	74155	ERBB receptor feedback inhibitor 1	1.39794	6.99642	24.013	1.66877e-09	2.41736e-07	12.5497
ENSMUSG00000024431	Nr3c1	14815	nuclear receptor subfamily 3, group C, member 1	1.98114	6.18792	23.9088	1.73482e-09	2.48298e-07	12.5746
ENSMUSG00000022096	Hr	15460	hairless	5.04829	3.32798	23.8903	1.74682e-09	2.48298e-07	11.9664
ENSMUSG00000056492	Adgrf5	224792	adhesion G protein-coupled receptor F5	5.88568	4.16416	23.8662	1.76258e-09	2.48298e-07	12.1718
ENSMUSG00000037788	Vopp1	232023	vesicular, overexpressed in cancer, prosurvival protein 1	-1.8974	5.80971	-23.8063	1.80254e-09	2.49309e-07	12.558
ENSMUSG00000044986	Tst	22117	thiosulfate sulfurtransferase, mitochondrial	2.99373	5.20384	23.7828	1.81847e-09	2.49309e-07	12.5561
ENSMUSG00000032357	Tinag	26944	tubulointerstitial nephritis antigen	4.64737	4.7704	23.8157	1.79622e-09	2.49309e-07	12.4628
ENSMUSG00000002147	Stat6	20852	signal transducer and activator of transcription 6	2.49273	5.57025	23.6453	1.91496e-09	2.60214e-07	12.5085
ENSMUSG00000022808	Snx4	69150	sorting nexin 4	1.21003	7.79449	23.6129	1.93855e-09	2.61108e-07	12.3319
ENSMUSG00000021703	Serinc5	218442	serine incorporator 5	1.7371	5.94051	23.5665	1.9728e-09	2.61141e-07	12.4535
ENSMUSG00000005148	Klf5	12224	Kruppel-like factor 5	2.93154	5.58503	23.5784	1.96391e-09	2.61141e-07	12.4851
ENSMUSG00000031891	Hsd11b2	15484	hydroxysteroid 11-beta dehydrogenase 2	-3.88934	2.93403	-23.5162	2.0107e-09	2.63884e-07	11.8546
ENSMUSG00000044033	Ccdc141	545428	coiled-coil domain containing 141	3.06879	3.52472	23.4154	2.08923e-09	2.71866e-07	12.191
ENSMUSG00000021583	Erap1	80898	endoplasmic reticulum aminopeptidase 1	2.19522	5.55658	23.2895	2.19201e-09	2.80487e-07	12.3699
ENSMUSG00000076441	Ass1	11898	argininosuccinate synthetase 1	4.66792	3.24896	23.2908	2.19094e-09	2.80487e-07	11.836
ENSMUSG00000026672	Optn	71648	optineurin	3.48566	3.28911	23.2517	2.22403e-09	2.82231e-07	12.0215
ENSMUSG00000024968	Rcor2	104383	REST corepressor 2	-3.19982	5.65894	-23.1919	2.27565e-09	2.84086e-07	12.3385
ENSMUSG00000006219	Fblim1	74202	filamin binding LIM protein 1	-1.69253	6.56138	-23.1962	2.2719e-09	2.84086e-07	12.2659
ENSMUSG00000003352	Cacnb3	12297	calcium channel, voltage-dependent, beta 3 subunit	-2.0346	5.68978	-23.1151	2.3439e-09	2.87924e-07	12.2974
ENSMUSG00000026971	Itgb6	16420	integrin beta 6	2.58177	4.97499	23.1305	2.33001e-09	2.87924e-07	12.3102
ENSMUSG00000041220	Elovl6	170439	ELOVL family member 6, elongation of long chain fatty acids (yeast)	-3.72436	4.08939	-23.0748	2.3806e-09	2.90112e-07	12.1379
ENSMUSG00000037852	Cpe	12876	carboxypeptidase E	-5.21581	3.83278	-23.0322	2.42011e-09	2.92029e-07	11.8581
ENSMUSG00000027239	Mdk	17242	midkine	-1.1393	8.75596	-23.017	2.43437e-09	2.92029e-07	12.0117
ENSMUSG00000026479	Lamc2	16782	laminin, gamma 2	2.1865	8.12187	22.8397	2.60796e-09	3.10428e-07	11.9986
ENSMUSG00000025272	Tro	56191	trophinin	-2.7852	4.92983	-22.763	2.68725e-09	3.14982e-07	12.1636
ENSMUSG00000024952	Rps6ka4	56613	ribosomal protein S6 kinase, polypeptide 4	3.14789	5.55576	22.7672	2.68286e-09	3.14982e-07	12.1738
ENSMUSG00000004885	Crabp2	12904	cellular retinoic acid binding protein II	-5.14265	3.70127	-22.7302	2.72202e-09	3.16548e-07	11.7256
ENSMUSG00000028047	Thbs3	21827	thrombospondin 3	1.56058	6.0925	22.7117	2.74184e-09	3.16548e-07	12.0997
ENSMUSG00000041247	Lamp3	239739	lysosomal-associated membrane protein 3	7.32477	4.32788	22.6658	2.79163e-09	3.19892e-07	11.5811
ENSMUSG00000022577	Ly6h	23934	lymphocyte antigen 6 complex, locus H	-4.4862	3.7126	-22.5413	2.93192e-09	3.2623e-07	11.7727
ENSMUSG00000027223	Mapk8ip1	19099	mitogen-activated protein kinase 8 interacting protein 1	-2.26578	4.89312	-22.5905	2.87564e-09	3.2623e-07	12.1021
ENSMUSG00000026639	Lamb3	16780	laminin, beta 3	1.58843	7.57675	22.5528	2.9187e-09	3.2623e-07	11.9166
ENSMUSG00000017774	Myo1c	17913	myosin IC	2.13015	6.98858	22.5713	2.89745e-09	3.2623e-07	11.9795
ENSMUSG00000062591	Tubb4a	22153	tubulin, beta 4A class IVA	-2.62249	5.98487	-22.4503	3.03942e-09	3.30995e-07	12.0269
ENSMUSG00000047694	Yipf6	77929	Yip1 domain family, member 6	1.62372	6.69781	22.465	3.02177e-09	3.30995e-07	11.9507
ENSMUSG00000028015	Ctso	229445	cathepsin O	3.01681	4.18622	22.4586	3.02944e-09	3.30995e-07	11.9868
ENSMUSG00000031099	Smarca1	93761	SWI/SNF related, matrix associated, actin dependent regulator of chromatin, subfamily a, member 1	1.94018	5.90375	22.391	3.1118e-09	3.36064e-07	11.9895
ENSMUSG00000064373	Selenop	20363	selenoprotein P	2.21091	5.45582	22.3766	3.12974e-09	3.36064e-07	12.0125
ENSMUSG00000025647	Shisa5	66940	shisa family member 5	1.59196	6.20057	22.355	3.15678e-09	3.36614e-07	11.9452
ENSMUSG00000071708	Sms	20603	spermine synthase	-1.45174	7.69509	-22.3051	3.22017e-09	3.41005e-07	11.803
ENSMUSG00000032826	Ank2	109676	ankyrin 2, brain	-3.24946	4.73687	-22.2511	3.29039e-09	3.45758e-07	11.9465
ENSMUSG00000028134	Ptbp2	56195	polypyrimidine tract binding protein 2	-1.50026	6.71701	-22.2362	3.31009e-09	3.45758e-07	11.8543
ENSMUSG00000028347	Tmeff1	230157	transmembrane protein with EGF-like and two follistatin-like domains 1	-2.05786	6.64787	-22.2188	3.33323e-09	3.45822e-07	11.8648
ENSMUSG00000068923	Syt11	229521	synaptotagmin XI	-3.75793	4.47682	-22.18	3.38545e-09	3.46557e-07	11.8757
ENSMUSG00000037995	Igsf9	93842	immunoglobulin superfamily, member 9	-1.94705	7.27703	-22.1958	3.36406e-09	3.46557e-07	11.7975
ENSMUSG00000046997	Spsb4	211949	splA/ryanodine receptor domain and SOCS box containing 4	-2.12124	4.55463	-22.1104	3.4814e-09	3.54019e-07	11.904
ENSMUSG00000027907	S100a11	20195	S100 calcium binding protein A11	1.79626	6.75887	21.966	3.69034e-09	3.72797e-07	11.7376
ENSMUSG00000070473	Cldn3	12739	claudin 3	1.11719	7.96306	21.9118	3.77242e-09	3.76139e-07	11.607
ENSMUSG00000090509	Sfta2	433102	surfactant associated 2	3.03279	5.39896	21.9162	3.76561e-09	3.76139e-07	11.8352
ENSMUSG00000021789	Sftpa1	20387	surfactant associated protein A1	3.95829	7.01076	21.8592	3.85387e-09	3.81782e-07	11.7303
ENSMUSG00000024981	Acsl5	433256	acyl-CoA synthetase long-chain family member 5	1.16432	8.02164	21.7921	3.9606e-09	3.85029e-07	11.5502
ENSMUSG00000090394	4930523C07Rik	67647	RIKEN cDNA 4930523C07 gene	1.91397	5.61668	21.7913	3.96188e-09	3.85029e-07	11.7589
ENSMUSG00000054342	Kcnn4	16534	potassium intermediate/small conductance calcium-activated channel, subfamily N, member 4	9.18262	-1.37734	21.8215	3.91344e-09	3.85029e-07	7.73979
ENSMUSG00000026880	Stom	13830	stomatin	3.11793	3.99469	21.7483	4.03219e-09	3.89398e-07	11.6907
ENSMUSG00000009097	Tbx1	21380	T-box 1	-2.43598	5.72142	-21.7257	4.06963e-09	3.90557e-07	11.7391
ENSMUSG00000051669	AU021092	239691	expressed sequence AU021092	8.61845	2.5956	21.7041	4.10577e-09	3.91578e-07	9.75575
ENSMUSG00000020312	Shc2	216148	SHC (Src homology 2 domain containing) transforming protein 2	-4.86513	2.75888	-21.6855	4.13718e-09	3.92138e-07	11.0155
ENSMUSG00000033581	Igf2bp2	319765	insulin-like growth factor 2 mRNA binding protein 2	-1.53447	7.83972	-21.6385	4.21774e-09	3.9486e-07	11.5035
ENSMUSG00000000385	Tmprss2	50528	transmembrane protease, serine 2	-1.52014	6.68663	-21.6403	4.21459e-09	3.9486e-07	11.6025
ENSMUSG00000019872	Smpdl3a	57319	sphingomyelin phosphodiesterase, acid-like 3A	2.22938	4.76696	21.624	4.24304e-09	3.9486e-07	11.7171
ENSMUSG00000007655	Cav1	12389	caveolin 1, caveolae protein	7.41036	3.23287	21.601	4.28331e-09	3.96207e-07	10.6529
ENSMUSG00000021559	Dapk1	69635	death associated protein kinase 1	1.85863	7.30787	21.567	4.34371e-09	3.99387e-07	11.5184
ENSMUSG00000091705	H2-Q2	15013	histocompatibility 2, Q region locus 2	-2.87089	5.20296	-21.5475	4.37877e-09	4.00214e-07	11.6864
ENSMUSG00000036862	Dchs1	233651	dachsous 1 (Drosophila)	-2.70231	4.32078	-21.5137	4.44034e-09	4.02729e-07	11.6425
ENSMUSG00000035517	Tdrd7	100121	tudor domain containing 7	2.26727	4.8537	21.5037	4.45873e-09	4.02729e-07	11.6685
ENSMUSG00000022665	Ccdc80	67896	coiled-coil domain containing 80	-2.21868	5.24996	-21.4734	4.51484e-09	4.05412e-07	11.6508
ENSMUSG00000055629	B4galnt4	330671	beta-1,4-N-acetyl-galactosaminyl transferase 4	-2.58052	5.15897	-21.4193	4.61734e-09	4.10425e-07	11.6329
ENSMUSG00000019831	Wasf1	83767	WAS protein family, member 1	-2.57499	4.63465	-21.2547	4.94487e-09	4.10425e-07	11.5591
ENSMUSG00000021728	Emb	13723	embigin	-1.97962	5.82193	-21.3097	4.83258e-09	4.10425e-07	11.5453
ENSMUSG00000062937	Mtap	66902	methylthioadenosine phosphorylase	-1.84544	6.19337	-21.2704	4.9125e-09	4.10425e-07	11.494
ENSMUSG00000031996	Aplp2	11804	amyloid beta (A4) precursor-like protein 2	1.10264	9.34169	21.3629	4.72665e-09	4.10425e-07	11.2413
ENSMUSG00000008575	Nfib	18028	nuclear factor I/B	1.24779	7.4556	21.3928	4.66843e-09	4.10425e-07	11.4223
ENSMUSG00000037822	Smim14	68552	small integral membrane protein 14	1.31668	6.14446	21.2685	4.91648e-09	4.10425e-07	11.4813
ENSMUSG00000033361	Prrg3	208748	proline rich Gla (G-carboxyglutamic acid) 3 (transmembrane)	1.8644	6.58331	21.3964	4.66146e-09	4.10425e-07	11.5083
ENSMUSG00000039382	Wdr45	54636	WD repeat domain 45	2.13655	5.40848	21.299	4.85414e-09	4.10425e-07	11.5666
ENSMUSG00000040998	Npnt	114249	nephronectin	2.37764	7.13737	21.3648	4.72293e-09	4.10425e-07	11.454
ENSMUSG00000019066	Rab3d	19340	RAB3D, member RAS oncogene family	2.53119	4.92095	21.2901	4.87222e-09	4.10425e-07	11.5802
ENSMUSG00000026817	Ak1	11636	adenylate kinase 1	2.7332	5.79539	21.3266	4.79867e-09	4.10425e-07	11.5673
ENSMUSG00000027831	Veph1	72789	ventricular zone expressed PH domain-containing 1	3.6438	3.63068	21.2601	4.93375e-09	4.10425e-07	11.4129
ENSMUSG00000029484	Anxa3	11745	annexin A3	5.45283	3.99073	21.3372	4.77759e-09	4.10425e-07	11.3417
ENSMUSG00000019998	Stx7	53331	syntaxin 7	1.7888	6.12917	21.2396	4.97617e-09	4.10801e-07	11.4796
ENSMUSG00000037621	Atoh8	71093	atonal bHLH transcription factor 8	2.63267	4.08066	21.2	5.05945e-09	4.15443e-07	11.5047
ENSMUSG00000060572	Mfap2	17150	microfibrillar-associated protein 2	-1.61994	6.88408	-21.1845	5.09231e-09	4.15917e-07	11.386
ENSMUSG00000022382	Wnt7b	22422	wingless-type MMTV integration site family, member 7B	-1.61063	9.01764	-21.1186	5.23528e-09	4.22054e-07	11.1661
ENSMUSG00000037031	Tspan15	70423	tetraspanin 15	1.85837	7.50995	21.112	5.24991e-09	4.22054e-07	11.2991
ENSMUSG00000006301	Tmbim1	69660	transmembrane BAX inhibitor motif containing 1	2.1209	5.29727	21.118	5.23659e-09	4.22054e-07	11.4945
ENSMUSG00000022995	Enah	13800	enabled homolog (Drosophila)	-1.71842	5.49003	-21.0623	5.36093e-09	4.26513e-07	11.4562
ENSMUSG00000031021	Tmem9b	56786	TMEM9 domain family, member B	1.77111	5.47187	21.0634	5.35827e-09	4.26513e-07	11.4552
ENSMUSG00000097040	2610316D01Rik	NA	RIKEN cDNA 2610316D01 gene	-4.83086	1.712	-20.9465	5.62989e-09	4.44872e-07	10.158
ENSMUSG00000021998	Lcp1	18826	lymphocyte cytosolic protein 1	2.5098	6.44361	20.9382	5.64962e-09	4.44872e-07	11.3359
ENSMUSG00000027552	E2f5	NA	E2F transcription factor 5	-1.4204	5.99508	-20.9061	5.7271e-09	4.48672e-07	11.341
ENSMUSG00000019810	Fuca2	66848	fucosidase, alpha-L- 2, plasma	1.22716	6.75909	20.8664	5.82464e-09	4.53997e-07	11.2455
ENSMUSG00000026811	St6galnac6	50935	ST6 (alpha-N-acetyl-neuraminyl-2,3-beta-galactosyl-1,3)-N-acetylgalactosaminide alpha-2,6-sialyltransferase 6	2.63802	4.58556	20.8169	5.94887e-09	4.61338e-07	11.3778
ENSMUSG00000025283	Sat1	20229	spermidine/spermine N1-acetyl transferase 1	1.61337	5.45236	20.773	6.06126e-09	4.65353e-07	11.3266
ENSMUSG00000039774	Galnt12	230145	UDP-N-acetyl-alpha-D-galactosamine:polypeptide N-acetylgalactosaminyltransferase 12	3.8192	3.7094	20.7805	6.04186e-09	4.65353e-07	11.2346
ENSMUSG00000030499	Kctd15	233107	potassium channel tetramerisation domain containing 15	-2.07036	5.00458	-20.7472	6.12854e-09	4.68178e-07	11.3478
ENSMUSG00000002602	Axl	26362	AXL receptor tyrosine kinase	-2.41682	5.16671	-20.6897	6.28136e-09	4.75125e-07	11.3217
ENSMUSG00000021684	Pde8b	218461	phosphodiesterase 8B	3.45254	3.4037	20.69	6.28071e-09	4.75125e-07	11.1625
ENSMUSG00000030022	Adamts9	101401	a disintegrin-like and metallopeptidase (reprolysin type) with thrombospondin type 1 motif, 9	2.85749	5.13152	20.654	6.3786e-09	4.80115e-07	11.3092
ENSMUSG00000008540	Mgst1	56615	microsomal glutathione S-transferase 1	1.69139	7.22621	20.6316	6.44019e-09	4.82386e-07	11.1034
ENSMUSG00000023232	Serinc2	230779	serine incorporator 2	-1.62764	5.91487	-20.5553	6.65549e-09	4.93696e-07	11.1962
ENSMUSG00000020167	Tcf3	21423	transcription factor 3	-1.0031	8.65978	-20.5595	6.64336e-09	4.93696e-07	10.9377
ENSMUSG00000034258	Mfsd7c	217721	major facilitator superfamily domain containing 7C	3.14293	3.61939	20.5438	6.68846e-09	4.93757e-07	11.1668
ENSMUSG00000039601	Rcan2	53901	regulator of calcineurin 2	-3.00337	5.28667	-20.4935	6.83568e-09	5.0221e-07	11.2391
ENSMUSG00000034463	Scara3	219151	scavenger receptor class A, member 3	1.88719	6.4973	20.4651	6.92026e-09	5.06003e-07	11.0999
ENSMUSG00000035835	Plppr3	216152	phospholipid phosphatase related 3	-2.18088	6.12606	-20.4447	6.98185e-09	5.08086e-07	11.1418
ENSMUSG00000046546	Fam43a	224093	family with sequence similarity 43, member A	-1.79628	5.10495	-20.396	7.1312e-09	5.16508e-07	11.1874
ENSMUSG00000025372	Baiap2	108100	brain-specific angiogenesis inhibitor 1-associated protein 2	2.29745	4.50336	20.3815	7.17637e-09	5.17339e-07	11.1934
ENSMUSG00000031176	Dynlt3	67117	dynein light chain Tctex-type 3	1.43575	6.28688	20.3666	7.22301e-09	5.17896e-07	11.0654
ENSMUSG00000037003	Tns2	209039	tensin 2	2.2883	4.8342	20.3575	7.25156e-09	5.17896e-07	11.1824
ENSMUSG00000036880	Acaa2	52538	acetyl-Coenzyme A acyltransferase 2 (mitochondrial 3-oxoacyl-Coenzyme A thiolase)	1.34342	7.40219	20.3299	7.33953e-09	5.21752e-07	10.944
ENSMUSG00000028541	B4galt2	53418	UDP-Gal:betaGlcNAc beta 1,4- galactosyltransferase, polypeptide 2	-1.95586	5.13517	-20.2616	7.56166e-09	5.35066e-07	11.1285
ENSMUSG00000050822	Slc29a4	243328	solute carrier family 29 (nucleoside transporters), member 4	-1.90806	4.90699	-20.2382	7.63954e-09	5.38097e-07	11.1269
ENSMUSG00000052681	Rap1b	215449	RAS related protein 1b	0.96142	8.09967	20.2063	7.74735e-09	5.43199e-07	10.8211
ENSMUSG00000075394	Hoxc4	15423	homeobox C4	-8.20393	-1.86472	-20.1704	7.87029e-09	5.4931e-07	7.44706
ENSMUSG00000012350	Ehf	13661	ets homologous factor	5.25685	2.1147	20.1548	7.92444e-09	5.50587e-07	10.1392
ENSMUSG00000038807	Rap1gap2	380711	RAP1 GTPase activating protein 2	-2.79351	4.46061	-20.136	7.99054e-09	5.50938e-07	11.0809
ENSMUSG00000026994	Galnt3	14425	UDP-N-acetyl-alpha-D-galactosamine:polypeptide N-acetylgalactosaminyltransferase 3	1.37351	5.97682	20.1228	8.03713e-09	5.50938e-07	10.9818
ENSMUSG00000027695	Pld1	18805	phospholipase D1	3.1604	3.50949	20.1228	8.03702e-09	5.50938e-07	10.98
ENSMUSG00000048899	Rimkla	194237	ribosomal modification protein rimK-like family member A	-3.21446	2.95371	-20.0477	8.30807e-09	5.61984e-07	10.8007
ENSMUSG00000006800	Sulf2	72043	sulfatase 2	-2.86257	6.34383	-20.0557	8.27857e-09	5.61984e-07	10.9636
ENSMUSG00000041351	Rap1gap	110351	Rap1 GTPase-activating protein	2.02849	4.97167	20.0478	8.30752e-09	5.61984e-07	11.0386
ENSMUSG00000024308	Tapbp	21356	TAP binding protein	1.66825	5.51785	20.0161	8.42494e-09	5.66445e-07	10.9816
ENSMUSG00000030559	Rab38	72433	RAB38, member RAS oncogene family	1.76792	4.92219	20.01	8.44779e-09	5.66445e-07	11.0208
ENSMUSG00000040097	Flywch1	224613	FLYWCH-type zinc finger 1	-1.31262	6.03493	-19.9713	8.59389e-09	5.71252e-07	10.9088
ENSMUSG00000024747	Aldh1a7	26358	aldehyde dehydrogenase family 1, subfamily A7	1.82326	7.54964	19.9736	8.58506e-09	5.71252e-07	10.7686
ENSMUSG00000024725	Ostf1	20409	osteoclast stimulating factor 1	1.8613	5.02737	19.9057	8.84829e-09	5.85627e-07	10.9695
ENSMUSG00000019906	Lin7a	108030	lin-7 homolog A (C. elegans)	-1.96705	5.49202	-19.8851	8.92985e-09	5.88489e-07	10.9349
ENSMUSG00000021364	Elovl2	54326	elongation of very long chain fatty acids (FEN1/Elo2, SUR4/Elo3, yeast)-like 2	-2.22794	5.04804	-19.8434	9.09764e-09	5.96984e-07	10.9482
ENSMUSG00000020570	Sypl	19027	synaptophysin-like protein	1.4499	6.98167	19.8224	9.18323e-09	6.00036e-07	10.7432
ENSMUSG00000027957	Slc35a3	229782	solute carrier family 35 (UDP-N-acetylglucosamine (UDP-GlcNAc) transporter), member 3	1.68154	5.4896	19.7677	9.41083e-09	6.12302e-07	10.8694
ENSMUSG00000029086	Prom1	19126	prominin 1	-1.77063	7.26562	-19.7544	9.46691e-09	6.13352e-07	10.6923
ENSMUSG00000052911	Lamb2	16779	laminin, beta 2	1.30213	7.57496	19.7406	9.52595e-09	6.14584e-07	10.6485
ENSMUSG00000074607	Tox2	269389	TOX high mobility group box family member 2	-3.57089	3.16292	-19.7118	9.64978e-09	6.19968e-07	10.6967
ENSMUSG00000013236	Ptprs	19280	protein tyrosine phosphatase, receptor type, S	-1.2248	7.92586	-19.7011	9.69627e-09	6.20359e-07	10.5986
ENSMUSG00000026796	Fam129b	227737	family with sequence similarity 129, member B	1.12114	8.37284	19.6897	9.74631e-09	6.20974e-07	10.5495
ENSMUSG00000053399	Adamts18	208936	a disintegrin-like and metallopeptidase (reprolysin type) with thrombospondin type 1 motif, 18	1.63134	6.35165	19.6538	9.90525e-09	6.28492e-07	10.7289
ENSMUSG00000038507	Parp12	243771	poly (ADP-ribose) polymerase family, member 12	3.94249	2.65337	19.6431	9.9529e-09	6.28917e-07	10.4875
ENSMUSG00000052609	Plekhg3	263406	pleckstrin homology domain containing, family G (with RhoGef domain) member 3	-2.97154	4.75058	-19.6275	1.00231e-08	6.3076e-07	10.8619
ENSMUSG00000029581	Fscn1	14086	fascin actin-bundling protein 1	-2.59636	7.19365	-19.6117	1.00952e-08	6.32699e-07	10.6509
ENSMUSG00000032418	Me1	17436	malic enzyme 1, NADP(+)-dependent, cytosolic	1.72432	6.02473	19.5745	1.02662e-08	6.36008e-07	10.7278
ENSMUSG00000054619	Mettl7a1	70152	methyltransferase like 7A1	2.9246	4.42271	19.5799	1.0241e-08	6.36008e-07	10.8374
ENSMUSG00000029134	Plb1	665270	phospholipase B1	4.70591	2.48199	19.5732	1.02722e-08	6.36008e-07	10.2709
ENSMUSG00000035000	Dpp4	13482	dipeptidylpeptidase 4	1.52785	7.56597	19.5366	1.04438e-08	6.44035e-07	10.5529
ENSMUSG00000022843	Clcn2	12724	chloride channel, voltage-sensitive 2	-1.79266	5.14043	-19.5262	1.04932e-08	6.44492e-07	10.7904
ENSMUSG00000024501	Dpysl3	22240	dihydropyrimidinase-like 3	-3.21421	3.56896	-19.5073	1.05837e-08	6.46945e-07	10.7219
ENSMUSG00000015312	Gadd45b	17873	growth arrest and DNA-damage-inducible 45 beta	3.04024	3.32374	19.5003	1.06174e-08	6.46945e-07	10.6986
ENSMUSG00000020176	Grb10	14783	growth factor receptor bound protein 10	-0.664835	11.2562	-19.4849	1.06921e-08	6.48924e-07	10.1664
ENSMUSG00000022773	Ypel1	106369	yippee-like 1 (Drosophila)	-1.53382	5.87599	-19.4721	1.07544e-08	6.50132e-07	10.6947
ENSMUSG00000022377	Asap1	13196	ArfGAP with SH3 domain, ankyrin repeat and PH domain1	-2.12631	5.08248	-19.4385	1.09202e-08	6.55001e-07	10.7591
ENSMUSG00000022595	Lypd2	68311	Ly6/Plaur domain containing 2	4.68799	2.14033	19.4386	1.09196e-08	6.55001e-07	10.0536
ENSMUSG00000034159	2310007B03Rik	71874	RIKEN cDNA 2310007B03 gene	6.21632	2.82842	19.4124	1.10506e-08	6.60241e-07	10.0675
ENSMUSG00000040649	Rimklb	108653	ribosomal modification protein rimK-like family member B	-1.49668	5.24617	-19.3665	1.12848e-08	6.6504e-07	10.7018
ENSMUSG00000047003	Zfp41	22701	zinc finger protein 41	-1.3993	6.38826	-19.3817	1.12068e-08	6.6504e-07	10.5936
ENSMUSG00000042688	Mapk6	50772	mitogen-activated protein kinase 6	-1.15451	7.35221	-19.3732	1.12502e-08	6.6504e-07	10.4907
ENSMUSG00000047040	Prr15l	217138	proline rich 15-like	1.51343	5.89789	19.3598	1.13195e-08	6.6504e-07	10.6327
ENSMUSG00000001542	Ell2	192657	elongation factor RNA polymerase II 2	2.4012	4.09819	19.3544	1.13475e-08	6.6504e-07	10.7316
ENSMUSG00000010663	Fads1	76267	fatty acid desaturase 1	-1.2753	7.40948	-19.3135	1.15616e-08	6.67867e-07	10.4575
ENSMUSG00000004929	Thop1	50492	thimet oligopeptidase 1	-1.10085	6.63774	-19.3139	1.15596e-08	6.67867e-07	10.5288
ENSMUSG00000017007	Rbpjl	19668	recombination signal binding protein for immunoglobulin kappa J region-like	2.71465	5.57372	19.3164	1.15465e-08	6.67867e-07	10.6766
ENSMUSG00000004328	Hif3a	53417	hypoxia inducible factor 3, alpha subunit	2.7532	6.01036	19.3038	1.16132e-08	6.67867e-07	10.6316
ENSMUSG00000030281	Il17rc	171095	interleukin 17 receptor C	3.01594	3.81391	19.3118	1.1571e-08	6.67867e-07	10.6837
ENSMUSG00000041261	Car8	12319	carbonic anhydrase 8	6.2319	2.71935	19.2849	1.17145e-08	6.71178e-07	9.96838
ENSMUSG00000020363	Gfpt2	14584	glutamine fructose-6-phosphate transaminase 2	-2.10758	4.48202	-19.2675	1.18086e-08	6.74059e-07	10.6986
ENSMUSG00000026930	Gpsm1	67839	G-protein signalling modulator 1 (AGS3-like, C. elegans)	-1.15114	6.40426	-19.2438	1.19376e-08	6.78894e-07	10.5195
ENSMUSG00000031428	Zcchc18	66995	zinc finger, CCHC domain containing 18	-2.24362	5.25123	-19.2145	1.20996e-08	6.85567e-07	10.646
ENSMUSG00000030519	Apba2	11784	amyloid beta (A4) precursor protein-binding, family A, member 2	-7.45318	1.28811	-19.1568	1.24264e-08	6.91326e-07	8.47818
ENSMUSG00000011589	Fsd1	240121	fibronectin type 3 and SPRY domain-containing protein	-5.12644	2.70269	-19.1411	1.25164e-08	6.91326e-07	10.093
ENSMUSG00000056124	B4galt6	56386	UDP-Gal:betaGlcNAc beta 1,4-galactosyltransferase, polypeptide 6	-4.59935	1.91339	-19.1472	1.24814e-08	6.91326e-07	9.81015
ENSMUSG00000066720	Cldn9	56863	claudin 9	-2.60471	4.39759	-19.1656	1.23758e-08	6.91326e-07	10.6511
ENSMUSG00000001552	Jup	16480	junction plakoglobin	1.11869	7.5668	19.1451	1.24934e-08	6.91326e-07	10.356
ENSMUSG00000033389	Arhgap44	216831	Rho GTPase activating protein 44	2.26686	5.11257	19.1831	1.22763e-08	6.91326e-07	10.6363
ENSMUSG00000025402	Nab2	17937	Ngfi-A binding protein 2	2.78178	3.58807	19.1739	1.23282e-08	6.91326e-07	10.6079
ENSMUSG00000028078	Dclk2	70762	doublecortin-like kinase 2	-2.32325	4.52747	-19.132	1.25691e-08	6.91754e-07	10.6365
ENSMUSG00000028871	Rspo1	192199	R-spondin 1	-3.77614	3.7947	-19.1168	1.26583e-08	6.94174e-07	10.5604
ENSMUSG00000021186	Fbln5	23876	fibulin 5	1.69652	6.24909	19.108	1.27098e-08	6.94518e-07	10.4773
ENSMUSG00000022132	Cldn10	58187	claudin 10	1.6294	6.3605	19.0941	1.27917e-08	6.96514e-07	10.4568
ENSMUSG00000067158	Col4a4	12829	collagen, type IV, alpha 4	3.31892	4.05048	19.0837	1.28538e-08	6.97421e-07	10.5945
ENSMUSG00000026072	Il1r1	16177	interleukin 1 receptor, type I	3.06471	3.89113	19.0414	1.31082e-08	7.08717e-07	10.5703
ENSMUSG00000020900	Myh10	77579	myosin, heavy polypeptide 10, non-muscle	-1.38065	7.71874	-18.9963	1.33864e-08	7.16198e-07	10.2723
ENSMUSG00000025856	Pdgfa	18590	platelet derived growth factor, alpha	1.31113	5.68394	19.0102	1.32997e-08	7.16198e-07	10.4807
ENSMUSG00000018821	Avpi1	69534	arginine vasopressin-induced 1	1.83782	6.12723	19.0014	1.33548e-08	7.16198e-07	10.4425
ENSMUSG00000050732	Vamp8	22320	vesicle-associated membrane protein 8	1.59431	5.8691	18.9565	1.36369e-08	7.27067e-07	10.4419
ENSMUSG00000027075	Slc43a1	72401	solute carrier family 43, member 1	-2.20192	4.57359	-18.93	1.38068e-08	7.33576e-07	10.5414
ENSMUSG00000001435	Col18a1	12822	collagen, type XVIII, alpha 1	1.1799	10.2779	18.8993	1.40061e-08	7.40438e-07	9.96285
ENSMUSG00000039031	Arhgap18	73910	Rho GTPase activating protein 18	1.26956	5.66679	18.8807	1.41288e-08	7.40438e-07	10.418
ENSMUSG00000028671	Gale	74246	galactose-4-epimerase, UDP	1.40833	5.31004	18.8826	1.41161e-08	7.40438e-07	10.458
ENSMUSG00000040856	Dlk1	13386	delta-like 1 homolog (Drosophila)	2.82336	7.86231	18.8861	1.4093e-08	7.40438e-07	10.2222
ENSMUSG00000029814	Igf2bp3	140488	insulin-like growth factor 2 mRNA binding protein 3	-1.1257	7.04825	-18.858	1.42797e-08	7.43268e-07	10.2628
ENSMUSG00000026249	Serpine2	20720	serine (or cysteine) peptidase inhibitor, clade E, member 2	1.67604	7.76241	18.8607	1.42617e-08	7.43268e-07	10.201
ENSMUSG00000022464	Slc38a4	69354	solute carrier family 38, member 4	-1.58064	7.62409	-18.8485	1.43433e-08	7.4406e-07	10.2094
ENSMUSG00000045636	Mtus1	102103	mitochondrial tumor suppressor 1	1.54738	5.36289	18.836	1.44277e-08	7.45917e-07	10.4331
ENSMUSG00000041390	Mdfic	16543	MyoD family inhibitor domain containing	2.86225	4.3378	18.7899	1.47437e-08	7.59695e-07	10.4771
ENSMUSG00000029838	Ptn	19242	pleiotrophin	-1.64996	5.24502	-18.7651	1.49172e-08	7.66063e-07	10.4163
ENSMUSG00000020601	Trib2	217410	tribbles pseudokinase 2	-3.5007	3.47774	-18.7288	1.51749e-08	7.76704e-07	10.36
ENSMUSG00000015090	Ptgds	19215	prostaglandin D2 synthase (brain)	6.07561	0.484573	18.6996	1.53854e-08	7.84858e-07	8.29525
ENSMUSG00000026064	Ptp4a1	19243	protein tyrosine phosphatase 4a1	-0.921446	8.11685	-18.6444	1.5793e-08	8.00335e-07	10.0516
ENSMUSG00000005873	Reep5	13476	receptor accessory protein 5	2.0532	5.19839	18.646	1.57806e-08	8.00335e-07	10.3669
ENSMUSG00000027238	Frmd5	228564	FERM domain containing 5	-2.31223	4.584	-18.6206	1.59718e-08	8.06732e-07	10.3955
ENSMUSG00000021242	Npc2	67963	Niemann-Pick type C2	1.11078	8.53884	18.565	1.63995e-08	8.25621e-07	9.97057
ENSMUSG00000004085	Map3k20	65964	mitogen-activated protein kinase kinase kinase 20	1.45191	5.76818	18.5369	1.66205e-08	8.34012e-07	10.2403
ENSMUSG00000053931	Cnn3	71994	calponin 3, acidic	-1.27304	8.79237	-18.5215	1.67434e-08	8.37441e-07	9.92551
ENSMUSG00000033917	Gde1	56209	glycerophosphodiester phosphodiesterase 1	1.09967	7.34306	18.4924	1.69769e-08	8.46366e-07	10.0466
ENSMUSG00000022969	Il10rb	16155	interleukin 10 receptor, beta	1.85084	4.59446	18.4713	1.71491e-08	8.46704e-07	10.3171
ENSMUSG00000021453	Gadd45g	23882	growth arrest and DNA-damage-inducible 45 gamma	2.16094	4.91964	18.4769	1.71035e-08	8.46704e-07	10.3066
ENSMUSG00000030554	Synm	233335	synemin, intermediate filament protein	4.77352	4.10253	18.4824	1.70586e-08	8.46704e-07	10.2789
ENSMUSG00000016995	Matn4	17183	matrilin 4	1.94108	6.38146	18.4589	1.72515e-08	8.49026e-07	10.1447
ENSMUSG00000021974	Fgf9	14180	fibroblast growth factor 9	3.83126	3.03904	18.4284	1.75053e-08	8.58768e-07	10.1351
ENSMUSG00000031808	Slc27a1	26457	solute carrier family 27 (fatty acid transporter), member 1	1.36558	6.25426	18.4166	1.76047e-08	8.60891e-07	10.1228
ENSMUSG00000028378	Ptgr1	67103	prostaglandin reductase 1	1.56465	6.08894	18.394	1.77964e-08	8.67506e-07	10.1349
ENSMUSG00000024827	Gldc	104174	glycine decarboxylase	-4.52859	3.45882	-18.3811	1.79068e-08	8.70125e-07	10.129
ENSMUSG00000037206	Islr	26968	immunoglobulin superfamily containing leucine-rich repeat	-3.1956	3.73913	-18.3229	1.84158e-08	8.92034e-07	10.2247
ENSMUSG00000032440	Tgfbr2	21813	transforming growth factor, beta receptor II	2.09023	6.36837	18.3031	1.85919e-08	8.97731e-07	10.0713
ENSMUSG00000027485	Bpifb1	228801	BPI fold containing family B, member 1	-3.11398	3.74745	-18.2604	1.89798e-08	9.1359e-07	10.1985
ENSMUSG00000056429	Tgoln1	22134	trans-golgi network protein	1.05168	7.39642	18.2456	1.91165e-08	9.17291e-07	9.91334
ENSMUSG00000029090	Adgra3	70693	adhesion G protein-coupled receptor A3	-1.11943	7.74973	-18.2345	1.92192e-08	9.19349e-07	9.87639
ENSMUSG00000015627	Gata5	14464	GATA binding protein 5	-2.52584	5.14316	-18.2219	1.93371e-08	9.22115e-07	10.1774
ENSMUSG00000021069	Pygl	110095	liver glycogen phosphorylase	1.61977	7.11851	18.1762	1.97696e-08	9.39341e-07	9.91082
ENSMUSG00000020205	Phlda1	21664	pleckstrin homology like domain, family A, member 1	2.12326	4.03612	18.1709	1.98207e-08	9.39341e-07	10.1832
ENSMUSG00000005672	Kit	16590	KIT proto-oncogene receptor tyrosine kinase	-2.56793	3.98008	-18.1456	2.00668e-08	9.4517e-07	10.1667
ENSMUSG00000007659	Bcl2l1	12048	BCL2-like 1	1.1548	7.20634	18.1497	2.00263e-08	9.4517e-07	9.88241
ENSMUSG00000026211	Obsl1	98733	obscurin-like 1	-1.09255	7.83736	-18.1369	2.0151e-08	9.46234e-07	9.81646
ENSMUSG00000046589	Lrrc8e	72267	leucine rich repeat containing 8 family, member E	2.20203	3.66387	18.1283	2.02362e-08	9.47336e-07	10.1513
ENSMUSG00000089715	Cbx6	494448	chromobox 6	1.4862	6.33284	18.0983	2.05344e-08	9.58374e-07	9.95269
ENSMUSG00000020902	Ntn1	18208	netrin 1	-3.51328	4.74172	-18.074	2.07791e-08	9.6355e-07	10.136
ENSMUSG00000046324	Ermp1	226090	endoplasmic reticulum metallopeptidase 1	-2.34822	4.06264	-18.0625	2.08963e-08	9.6355e-07	10.13
ENSMUSG00000047945	Marcksl1	17357	MARCKS-like 1	-0.764642	9.4264	-18.0671	2.08491e-08	9.6355e-07	9.61955
ENSMUSG00000017723	Wfdc2	67701	WAP four-disulfide core domain 2	1.23942	7.57084	18.0661	2.08595e-08	9.6355e-07	9.80434
ENSMUSG00000002068	Ccne1	12447	cyclin E1	-1.39438	6.71898	-18.0191	2.1344e-08	9.81251e-07	9.87025
ENSMUSG00000079659	Tmem243	652925	transmembrane protein 243, mitochondrial	1.8879	5.86349	18.0027	2.15168e-08	9.8624e-07	9.96995
ENSMUSG00000010358	Ifi35	70110	interferon-induced protein 35	4.23928	1.75939	17.996	2.15866e-08	9.86493e-07	9.43859
ENSMUSG00000020536	Llgl1	16897	lethal giant larvae homolog 1 (Drosophila)	-0.946312	7.64123	-17.9833	2.17223e-08	9.89751e-07	9.75296
ENSMUSG00000028392	Bspry	192120	B-box and SPRY domain containing	1.65791	7.52558	17.9596	2.19765e-08	9.95569e-07	9.75732
ENSMUSG00000091618	H60c	670558	histocompatibility 60c	7.433	-2.24994	17.9593	2.19797e-08	9.95569e-07	6.97885
ENSMUSG00000032328	Tmem30a	69981	transmembrane protein 30A	1.04194	7.53584	17.8862	2.2784e-08	1.02618e-06	9.71059
ENSMUSG00000031112	Stk26	70415	serine/threonine kinase 26	1.34522	5.93784	17.8858	2.27892e-08	1.02618e-06	9.88425
ENSMUSG00000042268	Slc26a9	320718	solute carrier family 26, member 9	2.48259	5.95748	17.8566	2.31192e-08	1.038e-06	9.90388
ENSMUSG00000027215	Cd82	12521	CD82 antigen	2.49336	4.8692	17.8269	2.34618e-08	1.05031e-06	9.99202
ENSMUSG00000031990	Jam3	83964	junction adhesion molecule 3	-3.50066	2.80152	-17.7886	2.39108e-08	1.0673e-06	9.81402
ENSMUSG00000028766	Alpl	11647	alkaline phosphatase, liver/bone/kidney	-2.58205	5.14487	-17.7559	2.43021e-08	1.07849e-06	9.94399
ENSMUSG00000002944	Cd36	12491	CD36 antigen	7.72441	2.67552	17.7615	2.42348e-08	1.07849e-06	9.0418
ENSMUSG00000041771	Slc24a4	238384	solute carrier family 24 (sodium/potassium/calcium exchanger), member 4	4.93095	1.33907	17.7412	2.44804e-08	1.08327e-06	8.9822
ENSMUSG00000001891	Ugp2	216558	UDP-glucose pyrophosphorylase 2	1.11924	6.82721	17.7164	2.47839e-08	1.09355e-06	9.69054
ENSMUSG00000019082	Slc25a22	68267	solute carrier family 25 (mitochondrial carrier, glutamate), member 22	-1.42544	5.46778	-17.6798	2.52403e-08	1.10051e-06	9.83913
ENSMUSG00000046733	Gprc5a	232431	G protein-coupled receptor, family C, group 5, member A	1.55498	7.06428	17.6694	2.53715e-08	1.10051e-06	9.64686
ENSMUSG00000023960	Enpp5	83965	ectonucleotide pyrophosphatase/phosphodiesterase 5	1.72426	6.18986	17.6968	2.50268e-08	1.10051e-06	9.76509
ENSMUSG00000026202	Tuba4a	22145	tubulin, alpha 4A	1.7798	5.85382	17.6727	2.53289e-08	1.10051e-06	9.79505
ENSMUSG00000067279	Ppp1r3c	53412	protein phosphatase 1, regulatory (inhibitor) subunit 3C	2.83176	3.32732	17.6825	2.52055e-08	1.10051e-06	9.90386
ENSMUSG00000010830	Kdelr3	105785	KDEL (Lys-Asp-Glu-Leu) endoplasmic reticulum protein retention receptor 3	3.01957	3.54782	17.6876	2.51419e-08	1.10051e-06	9.92121
ENSMUSG00000032374	Plod2	26432	procollagen lysine, 2-oxoglutarate 5-dioxygenase 2	1.02712	6.66869	17.6612	2.54747e-08	1.10187e-06	9.67643
ENSMUSG00000008035	Mid1ip1	68041	Mid1 interacting protein 1 (gastrulation specific G12-like (zebrafish))	1.50183	6.13139	17.6522	2.55896e-08	1.10373e-06	9.74219
ENSMUSG00000025789	St8sia2	20450	ST8 alpha-N-acetyl-neuraminide alpha-2,8-sialyltransferase 2	-2.90015	3.81885	-17.6389	2.57601e-08	1.10488e-06	9.91281
ENSMUSG00000030319	Cand2	67088	cullin-associated and neddylation-dissociated 2 (putative)	-1.2955	6.77654	-17.6423	2.57169e-08	1.10488e-06	9.66207
ENSMUSG00000020034	Tcp11l2	216198	t-complex 11 (mouse) like 2	2.21467	5.04299	17.5722	2.66342e-08	1.13919e-06	9.84212
ENSMUSG00000032601	Prkar2a	19087	protein kinase, cAMP dependent regulatory, type II alpha	-1.08285	7.30519	-17.5603	2.67947e-08	1.14287e-06	9.56055
ENSMUSG00000044528	Tram1l1	229801	translocation associated membrane protein 1-like 1	-3.42017	2.34452	-17.5496	2.69384e-08	1.14581e-06	9.58978
ENSMUSG00000070576	Mn1	433938	meningioma 1	-2.5869	3.04592	-17.5379	2.70977e-08	1.14624e-06	9.8031
ENSMUSG00000014592	Camta1	100072	calmodulin binding transcription activator 1	-1.45093	5.59906	-17.5388	2.7085e-08	1.14624e-06	9.75056
ENSMUSG00000028339	Col15a1	12819	collagen, type XV, alpha 1	7.46047	1.45962	17.5136	2.743e-08	1.15711e-06	8.27151
ENSMUSG00000035934	Pknox2	208076	Pbx/knotted 1 homeobox 2	-3.27016	2.52353	-17.4501	2.83222e-08	1.18932e-06	9.61295
ENSMUSG00000034957	Cebpa	12606	CCAAT/enhancer binding protein (C/EBP), alpha	3.5318	3.60505	17.4483	2.83484e-08	1.18932e-06	9.79793
ENSMUSG00000015176	Nolc1	70769	nucleolar and coiled-body phosphoprotein 1	-0.882079	7.35224	-17.4072	2.89432e-08	1.21096e-06	9.4706
ENSMUSG00000026070	Il18r1	16182	interleukin 18 receptor 1	6.81322	1.17705	17.3738	2.94369e-08	1.22827e-06	8.23553
ENSMUSG00000006360	Crip1	12925	cysteine-rich protein 1 (intestinal)	2.02409	5.04776	17.3357	3.00115e-08	1.24885e-06	9.71251
ENSMUSG00000013629	Cad	69719	carbamoyl-phosphate synthetase 2, aspartate transcarbamylase, and dihydroorotase	-1.31585	7.58262	-17.3218	3.02238e-08	1.25429e-06	9.40588
ENSMUSG00000030103	Bhlhe40	20893	basic helix-loop-helix family, member e40	1.74532	4.36441	17.3019	3.05315e-08	1.26364e-06	9.74073
ENSMUSG00000068617	Efcab1	66793	EF hand calcium binding domain 1	-2.50222	4.96572	-17.2905	3.07101e-08	1.26588e-06	9.71353
ENSMUSG00000043323	Fbrsl1	381668	fibrosin-like 1	-1.90476	5.65571	-17.2826	3.08328e-08	1.26588e-06	9.62254
ENSMUSG00000033060	Lmo7	380928	LIM domain only 7	4.07656	5.65042	17.2846	3.08012e-08	1.26588e-06	9.6976
ENSMUSG00000032702	Kank1	107351	KN motif and ankyrin repeat domains 1	-1.70568	5.91225	-17.2414	3.14881e-08	1.28933e-06	9.5618
ENSMUSG00000042312	S100a13	20196	S100 calcium binding protein A13	3.51153	1.85157	17.2234	3.17795e-08	1.2978e-06	9.29153
ENSMUSG00000020307	Cdc34	216150	cell division cycle 34	-1.26797	6.92882	-17.2047	3.20838e-08	1.30675e-06	9.40728
ENSMUSG00000045763	Basp1	70350	brain abundant, membrane attached signal protein 1	-3.23892	4.76584	-17.1753	3.25711e-08	1.32309e-06	9.68016
ENSMUSG00000015932	Dstn	56431	destrin	0.752321	8.82292	17.1574	3.28705e-08	1.33173e-06	9.18563
ENSMUSG00000024479	Mal2	105853	mal, T cell differentiation protein 2	1.13313	8.94623	17.1493	3.30071e-08	1.33375e-06	9.17008
ENSMUSG00000035863	Palm	18483	paralemmin	-1.18733	5.84372	-17.1279	3.33727e-08	1.34498e-06	9.49185
ENSMUSG00000110476	4930422C21Rik	NA	RIKEN cDNA 4930422C21 gene	-7.97956	-1.98461	-17.1189	3.3527e-08	1.34766e-06	6.87375
ENSMUSG00000021876	Rnase4	58809	ribonuclease, RNase A family 4	2.74235	3.88949	17.0811	3.41856e-08	1.37055e-06	9.64088
ENSMUSG00000013921	Clip3	76686	CAP-GLY domain containing linker protein 3	-5.94697	2.26296	-17.0481	3.4773e-08	1.37969e-06	8.94686
ENSMUSG00000036030	Prtg	235472	protogenin	-5.49793	1.42888	-17.051	3.47206e-08	1.37969e-06	8.60711
ENSMUSG00000038650	Rnh1	107702	ribonuclease/angiogenin inhibitor 1	0.940863	7.12643	17.0522	3.46988e-08	1.37969e-06	9.29604
ENSMUSG00000047963	Stbd1	52331	starch binding domain 1	2.50476	5.69879	17.0522	3.46989e-08	1.37969e-06	9.50743
ENSMUSG00000027570	Col9a3	12841	collagen, type IX, alpha 3	2.18467	6.43996	17.0246	3.51976e-08	1.39294e-06	9.38502
ENSMUSG00000097604	Gm17322	NA	predicted gene, 17322	-3.6128	2.03298	-16.9961	3.57202e-08	1.3951e-06	9.22674
ENSMUSG00000032186	Tmod2	50876	tropomodulin 2	-3.24778	2.78825	-16.9857	3.59125e-08	1.3951e-06	9.46609
ENSMUSG00000105039	Gm42637	NA	predicted gene 42637	-3.09487	3.71068	-16.9748	3.61165e-08	1.3951e-06	9.57663
ENSMUSG00000047407	Tgif1	21815	TGFB-induced factor homeobox 1	-1.02264	6.60953	-17.0009	3.56315e-08	1.3951e-06	9.32557
ENSMUSG00000019951	Uhrf1bp1l	75089	UHRF1 (ICBP90) binding protein 1-like	1.05305	7.1917	17.0101	3.54618e-08	1.3951e-06	9.26699
ENSMUSG00000000159	Igsf5	72058	immunoglobulin superfamily, member 5	1.72088	4.54975	16.9959	3.5724e-08	1.3951e-06	9.56846
ENSMUSG00000032548	Slco2a1	24059	solute carrier organic anion transporter family, member 2a1	2.40617	5.41666	17.011	3.54456e-08	1.3951e-06	9.51344
ENSMUSG00000016128	Stard13	243362	StAR-related lipid transfer (START) domain containing 13	2.70781	3.48732	16.9724	3.61608e-08	1.3951e-06	9.57337
ENSMUSG00000036256	Igfbp7	29817	insulin-like growth factor binding protein 7	3.97231	3.92623	16.9732	3.6145e-08	1.3951e-06	9.57481
ENSMUSG00000048582	Gja3	14611	gap junction protein, alpha 3	5.111	1.0684	16.9846	3.59324e-08	1.3951e-06	8.5126
ENSMUSG00000027356	Fermt1	241639	fermitin family member 1	-1.92715	4.29221	-16.9638	3.63212e-08	1.39522e-06	9.57163
ENSMUSG00000026496	Parp1	11545	poly (ADP-ribose) polymerase family, member 1	-0.804603	8.64886	-16.9626	3.63457e-08	1.39522e-06	9.0949
ENSMUSG00000039985	Fam60a	56306	family with sequence similarity 60, member A	-0.937386	7.7163	-16.9525	3.65364e-08	1.39845e-06	9.18315
ENSMUSG00000027187	Cat	12359	catalase	0.954292	7.58192	16.9485	3.66121e-08	1.39845e-06	9.19267
ENSMUSG00000003746	Man1a	17155	mannosidase 1, alpha	2.21737	3.08148	16.9229	3.71012e-08	1.41362e-06	9.52807
ENSMUSG00000040693	Slco4c1	227394	solute carrier organic anion transporter family, member 4C1	3.35245	5.11532	16.9163	3.72296e-08	1.415e-06	9.52155
ENSMUSG00000046761	Fam83h	105732	family with sequence similarity 83, member H	1.43978	4.94666	16.8763	3.80121e-08	1.43583e-06	9.46248
ENSMUSG00000005360	Slc1a3	20512	solute carrier family 1 (glial high affinity glutamate transporter), member 3	1.85639	5.45386	16.8749	3.80394e-08	1.43583e-06	9.4159
ENSMUSG00000031355	Arhgap6	11856	Rho GTPase activating protein 6	2.14641	3.71441	16.874	3.80581e-08	1.43583e-06	9.53455
ENSMUSG00000028063	Lmna	16905	lamin A	1.87122	4.73644	16.8673	3.81909e-08	1.43731e-06	9.48736
ENSMUSG00000020649	Rrm2	20135	ribonucleotide reductase M2	-0.941061	8.89398	-16.8576	3.83841e-08	1.44105e-06	9.01115
ENSMUSG00000017756	Slc12a7	20499	solute carrier family 12, member 7	-1.17391	6.60764	-16.8472	3.85925e-08	1.44534e-06	9.24293
ENSMUSG00000042258	Isl1	16392	ISL1 transcription factor, LIM/homeodomain	-4.63907	2.46724	-16.8173	3.92004e-08	1.46098e-06	9.16906
ENSMUSG00000038544	Inip	66209	INTS3 and NABP interacting protein	-0.962335	6.84064	-16.8217	3.91105e-08	1.46098e-06	9.1989
ENSMUSG00000030536	Iqgap1	29875	IQ motif containing GTPase activating protein 1	1.26806	8.82976	16.7725	4.01305e-08	1.49202e-06	8.96995
ENSMUSG00000034520	Gjc1	14615	gap junction protein, gamma 1	-0.921904	6.82667	-16.7647	4.02949e-08	1.49451e-06	9.16776
ENSMUSG00000026126	Ptpn18	19253	protein tyrosine phosphatase, non-receptor type 18	2.62765	2.5572	16.7139	4.13848e-08	1.53124e-06	9.34124
ENSMUSG00000050530	Fam171a1	269233	family with sequence similarity 171, member A1	-1.11709	6.70016	-16.668	4.23968e-08	1.56491e-06	9.1301
ENSMUSG00000022816	Fstl1	14314	follistatin-like 1	1.14469	8.88405	16.6382	4.3069e-08	1.58591e-06	8.88671
ENSMUSG00000038296	Galnt18	233733	UDP-N-acetyl-alpha-D-galactosamine:polypeptide N-acetylgalactosaminyltransferase 18	2.23284	4.92459	16.633	4.31871e-08	1.58645e-06	9.35196
ENSMUSG00000036533	Cdc42ep3	260409	CDC42 effector protein (Rho GTPase binding) 3	2.21097	4.89088	16.6017	4.39078e-08	1.60908e-06	9.33739
ENSMUSG00000000325	Arvcf	11877	armadillo repeat gene deleted in velocardiofacial syndrome	-1.57621	6.1283	-16.5958	4.40455e-08	1.61028e-06	9.17198
ENSMUSG00000037798	Mat1a	11720	methionine adenosyltransferase I, alpha	3.45768	4.37388	16.5844	4.43117e-08	1.61617e-06	9.3811
ENSMUSG00000016918	Sulf1	240725	sulfatase 1	-3.31929	2.57133	-16.5787	4.4446e-08	1.61722e-06	9.22484
ENSMUSG00000015837	Sqstm1	18412	sequestosome 1	0.837952	7.49445	16.557	4.49607e-08	1.62495e-06	8.97814
ENSMUSG00000031889	D230025D16Rik	234678	RIKEN cDNA D230025D16 gene	1.30751	6.41778	16.5563	4.49757e-08	1.62495e-06	9.0997
ENSMUSG00000029378	Areg	11839	amphiregulin	7.94732	0.259549	16.5609	4.48671e-08	1.62495e-06	6.93314
ENSMUSG00000034487	Kdelc2	68304	KDEL (Lys-Asp-Glu-Leu) containing 2	1.16774	6.48039	16.5397	4.53732e-08	1.63494e-06	9.07991
ENSMUSG00000027452	Acss1	68738	acyl-CoA synthetase short-chain family member 1	2.16658	4.94729	16.5359	4.54652e-08	1.63494e-06	9.29423
ENSMUSG00000034164	Emid1	140703	EMI domain containing 1	-1.85338	5.75959	-16.5274	4.56718e-08	1.63853e-06	9.19161
ENSMUSG00000033316	Galnt9	231605	UDP-N-acetyl-alpha-D-galactosamine:polypeptide N-acetylgalactosaminyltransferase 9	-6.92532	-2.32812	-16.4778	4.68942e-08	1.65769e-06	6.63932
ENSMUSG00000020142	Slc1a4	55963	solute carrier family 1 (glutamate/neutral amino acid transporter), member 4	-1.21357	6.08159	-16.4882	4.66341e-08	1.65769e-06	9.10564
ENSMUSG00000045598	Zfp553	233887	zinc finger protein 553	-1.11685	6.34281	-16.4932	4.65092e-08	1.65769e-06	9.07296
ENSMUSG00000020935	Dcakd	68087	dephospho-CoA kinase domain containing	-0.841684	8.00999	-16.4904	4.65797e-08	1.65769e-06	8.88945
ENSMUSG00000004451	Ralb	64143	v-ral simian leukemia viral oncogene B	1.03472	6.53894	16.4756	4.69486e-08	1.65769e-06	9.03412
ENSMUSG00000038305	Spats2l	67198	spermatogenesis associated, serine-rich 2-like	1.26879	5.38068	16.4751	4.69616e-08	1.65769e-06	9.18497
ENSMUSG00000036528	Ppfibp2	19024	PTPRF interacting protein, binding protein 2 (liprin beta 2)	2.17716	4.599	16.4875	4.66524e-08	1.65769e-06	9.29827
ENSMUSG00000028431	Ikbkap	230233	inhibitor of kappa light polypeptide enhancer in B cells, kinase complex-associated protein	-1.22773	7.42342	-16.4507	4.75767e-08	1.67172e-06	8.93014
ENSMUSG00000036503	Rnf13	24017	ring finger protein 13	1.05304	5.89189	16.4516	4.75538e-08	1.67172e-06	9.09963
ENSMUSG00000024613	Tcof1	21453	treacle ribosome biogenesis factor 1	-0.903546	7.16424	-16.4401	4.78469e-08	1.67355e-06	8.94677
ENSMUSG00000029864	Gstk1	76263	glutathione S-transferase kappa 1	1.76201	4.33811	16.4424	4.77866e-08	1.67355e-06	9.28535
ENSMUSG00000032796	Lama1	16772	laminin, alpha 1	-3.06318	4.52008	-16.4349	4.79787e-08	1.67435e-06	9.29431
ENSMUSG00000021608	Lpcat1	210992	lysophosphatidylcholine acyltransferase 1	1.98635	8.53072	16.4221	4.83083e-08	1.68203e-06	8.80495
ENSMUSG00000030774	Pak1	18479	p21 protein (Cdc42/Rac)-activated kinase 1	-1.22365	6.43351	-16.4136	4.85274e-08	1.68203e-06	9.01887
ENSMUSG00000021268	Meg3	NA	maternally expressed 3	1.82265	5.37822	16.4166	4.84512e-08	1.68203e-06	9.16874
ENSMUSG00000020592	Sdc1	20969	syndecan 1	0.843747	8.46766	16.3948	4.90188e-08	1.69524e-06	8.78704
ENSMUSG00000038884	A230050P20Rik	319278	RIKEN cDNA A230050P20 gene	3.92751	2.68851	16.3638	4.98401e-08	1.71976e-06	9.11706
ENSMUSG00000001228	Uhrf1	18140	ubiquitin-like, containing PHD and RING finger domains, 1	-1.01604	8.7639	-16.353	5.01304e-08	1.72204e-06	8.73415
ENSMUSG00000021185	9030617O03Rik	217830	RIKEN cDNA 9030617O03 gene	5.88785	0.678653	16.3561	5.00468e-08	1.72204e-06	7.8446
ENSMUSG00000027499	Pkia	18767	protein kinase inhibitor, alpha	-1.39809	5.14742	-16.3471	5.02885e-08	1.72362e-06	9.15064
ENSMUSG00000031604	Msmo1	66234	methylsterol monoxygenase 1	-1.28353	6.59879	-16.3429	5.04012e-08	1.72363e-06	8.95929
ENSMUSG00000020598	Nrcam	319504	neuronal cell adhesion molecule	-3.74542	2.91017	-16.3354	5.06072e-08	1.7257e-06	9.14443
ENSMUSG00000110086	Gm45623	NA	predicted gene 45623	-2.65824	3.53405	-16.3197	5.10348e-08	1.7257e-06	9.23841
ENSMUSG00000020658	Efr3b	668212	EFR3 homolog B	-1.79734	4.65183	-16.3194	5.10436e-08	1.7257e-06	9.19779
ENSMUSG00000035049	Rrp12	107094	ribosomal RNA processing 12 homolog (S. cerevisiae)	-1.32875	6.02537	-16.3186	5.10648e-08	1.7257e-06	9.01948
ENSMUSG00000069793	Slfn9	237886	schlafen 9	1.13415	6.48522	16.316	5.11359e-08	1.7257e-06	8.95015
ENSMUSG00000036273	Lrrk2	66725	leucine-rich repeat kinase 2	3.92193	3.45824	16.3295	5.07654e-08	1.7257e-06	9.21843
ENSMUSG00000042354	Gnl3	30877	guanine nucleotide binding protein-like 3 (nucleolar)	-0.897745	6.95111	-16.3091	5.13254e-08	1.72829e-06	8.89322
ENSMUSG00000026003	Acadl	11363	acyl-Coenzyme A dehydrogenase, long-chain	1.21723	7.21866	16.3021	5.15189e-08	1.73101e-06	8.86241
ENSMUSG00000060735	Rxfp3	239336	relaxin family peptide receptor 3	-8.12656	-1.15831	-16.2958	5.1694e-08	1.73182e-06	6.74483
ENSMUSG00000025558	Dock9	105445	dedicator of cytokinesis 9	2.10149	5.63898	16.2932	5.17686e-08	1.73182e-06	9.07621
ENSMUSG00000025478	Dpysl4	26757	dihydropyrimidinase-like 4	-5.27775	2.67773	-16.2739	5.231e-08	1.74613e-06	8.90158
ENSMUSG00000044080	S100a1	20193	S100 calcium binding protein A1	2.73179	3.48943	16.2405	5.32597e-08	1.77397e-06	9.1966
ENSMUSG00000045333	Zfp423	94187	zinc finger protein 423	-3.53706	3.31776	-16.2328	5.34821e-08	1.77707e-06	9.16064
ENSMUSG00000060548	Tnfrsf19	29820	tumor necrosis factor receptor superfamily, member 19	-1.24898	7.20954	-16.2267	5.36598e-08	1.77707e-06	8.82241
ENSMUSG00000010025	Aldh3a2	11671	aldehyde dehydrogenase family 3, subfamily A2	1.18434	6.20615	16.2197	5.38613e-08	1.77707e-06	8.92955
ENSMUSG00000002020	Ltbp2	16997	latent transforming growth factor beta binding protein 2	3.09222	3.73608	16.2173	5.39312e-08	1.77707e-06	9.18755
ENSMUSG00000042429	Adora1	11539	adenosine A1 receptor	7.84648	1.48889	16.2204	5.38412e-08	1.77707e-06	7.75078
ENSMUSG00000038059	Smim3	106878	small integral membrane protein 3	1.61657	5.26859	16.2074	5.42212e-08	1.7828e-06	9.05701
ENSMUSG00000039497	Dse	212898	dermatan sulfate epimerase	-2.61115	2.74257	-16.1767	5.5131e-08	1.80884e-06	9.09891
ENSMUSG00000022098	Bmp1	12153	bone morphogenetic protein 1	0.938266	8.28862	16.1686	5.53734e-08	1.81292e-06	8.67284
ENSMUSG00000031627	Irf2	16363	interferon regulatory factor 2	1.86522	4.36901	16.1572	5.57177e-08	1.82031e-06	9.12725
ENSMUSG00000032187	Smarca4	20586	SWI/SNF related, matrix associated, actin dependent regulator of chromatin, subfamily a, member 4	-0.90234	8.65392	-16.1352	5.63889e-08	1.83443e-06	8.6167
ENSMUSG00000009614	Sardh	192166	sarcosine dehydrogenase	4.77744	2.33859	16.136	5.63634e-08	1.83443e-06	8.82713
ENSMUSG00000032017	Grik4	110637	glutamate receptor, ionotropic, kainate 4	-1.71356	4.55907	-16.0856	5.79315e-08	1.87271e-06	9.0731
ENSMUSG00000025059	Gk	14933	glycerol kinase	1.52986	5.33791	16.0882	5.78478e-08	1.87271e-06	8.9774
ENSMUSG00000079465	Col4a3	12828	collagen, type IV, alpha 3	3.5925	3.34086	16.0911	5.77586e-08	1.87271e-06	9.09528
ENSMUSG00000067889	Sptbn2	20743	spectrin beta, non-erythrocytic 2	-2.21269	4.36241	-16.0686	5.84703e-08	1.88616e-06	9.08728
ENSMUSG00000002870	Mcm2	17216	minichromosome maintenance complex component 2	-0.755616	8.8054	-16.0551	5.89013e-08	1.89211e-06	8.55282
ENSMUSG00000035064	Eef2k	13631	eukaryotic elongation factor-2 kinase	1.45099	5.35044	16.0568	5.88465e-08	1.89211e-06	8.955
ENSMUSG00000026303	Mlph	171531	melanophilin	5.36373	1.16604	16.0496	5.90787e-08	1.89385e-06	8.17171
ENSMUSG00000048644	Ctxn1	330695	cortexin 1	-1.44791	5.33605	-16.0377	5.94639e-08	1.90222e-06	8.95219
ENSMUSG00000040669	Phc1	13619	polyhomeotic-like 1 (Drosophila)	-1.16499	6.16388	-16.0282	5.97744e-08	1.90818e-06	8.82785
ENSMUSG00000039007	Cpq	54381	carboxypeptidase Q	1.75325	5.70268	16.0044	6.05571e-08	1.92916e-06	8.88831
ENSMUSG00000024269	Tpgs2	66648	tubulin polyglutamylase complex subunit 2	-1.23928	5.87498	-15.9929	6.09426e-08	1.93742e-06	8.84768
ENSMUSG00000024043	Arhgap28	268970	Rho GTPase activating protein 28	-2.57643	5.42749	-15.978	6.14415e-08	1.94925e-06	8.94948
ENSMUSG00000017491	Rarb	218772	retinoic acid receptor, beta	-1.87624	5.40714	-15.9621	6.19815e-08	1.96232e-06	8.91404
ENSMUSG00000006958	Chrd	12667	chordin	-4.81615	2.52854	-15.952	6.23243e-08	1.96507e-06	8.77111
ENSMUSG00000036249	Rbm43	71684	RNA binding motif protein 43	2.91233	2.90811	15.9526	6.23055e-08	1.96507e-06	9.00222
ENSMUSG00000037275	Gemin5	216766	gem (nuclear organelle) associated protein 5	-1.07592	6.46649	-15.9181	6.34958e-08	1.99366e-06	8.72237
ENSMUSG00000003161	Sri	109552	sorcin	1.0838	7.35711	15.9146	6.36207e-08	1.99366e-06	8.61835
ENSMUSG00000030093	Wnt7a	22421	wingless-type MMTV integration site family, member 7A	3.6752	1.73688	15.9165	6.35535e-08	1.99366e-06	8.66661
ENSMUSG00000041420	Meis3	17537	Meis homeobox 3	-2.09222	3.55982	-15.8961	6.42731e-08	2.01001e-06	9.01452
ENSMUSG00000001467	Cyp51	13121	cytochrome P450, family 51	-1.3543	7.06636	-15.8902	6.44825e-08	2.01246e-06	8.64069
ENSMUSG00000033059	Pygb	110078	brain glycogen phosphorylase	0.831469	7.7225	15.8853	6.46538e-08	2.01371e-06	8.56111
ENSMUSG00000022351	Sqle	20775	squalene epoxidase	-1.2869	7.8179	-15.8566	6.56872e-08	2.04175e-06	8.54032
ENSMUSG00000054555	Adam12	11489	a disintegrin and metallopeptidase domain 12 (meltrin alpha)	1.56893	4.41488	15.8505	6.59099e-08	2.04454e-06	8.94571
ENSMUSG00000028776	Tinagl1	94242	tubulointerstitial nephritis antigen-like 1	1.38949	6.05733	15.8181	6.71015e-08	2.07731e-06	8.71832
ENSMUSG00000028249	Sdcbp	53378	syndecan binding protein	0.861724	8.63251	15.8085	6.74575e-08	2.08326e-06	8.42256
ENSMUSG00000016534	Lamp2	16784	lysosomal-associated membrane protein 2	0.918408	7.90807	15.8057	6.75653e-08	2.08326e-06	8.49497
ENSMUSG00000054986	Sec14l3	380683	SEC14-like lipid binding 3	9.02147	1.41471	15.7789	6.85742e-08	2.11013e-06	7.19596
ENSMUSG00000051177	Plcb1	18795	phospholipase C, beta 1	-2.58897	3.73296	-15.7683	6.89803e-08	2.11839e-06	8.94432
ENSMUSG00000031089	Slc6a14	56774	solute carrier family 6 (neurotransmitter transporter), member 14	5.56677	3.58183	15.7586	6.93534e-08	2.12559e-06	8.85904
ENSMUSG00000036856	Wnt4	22417	wingless-type MMTV integration site family, member 4	-2.844	2.4834	-15.7459	6.98433e-08	2.12638e-06	8.8304
ENSMUSG00000025921	Rdh10	98711	retinol dehydrogenase 10 (all-trans)	-1.88736	4.71978	-15.7468	6.98096e-08	2.12638e-06	8.86905
ENSMUSG00000039959	Hip1	215114	huntingtin interacting protein 1	-1.78337	5.7469	-15.7473	6.97903e-08	2.12638e-06	8.74002
ENSMUSG00000006205	Htra1	56213	HtrA serine peptidase 1	2.65753	2.93577	15.7436	6.99329e-08	2.12638e-06	8.90226
ENSMUSG00000028693	Nasp	50927	nuclear autoantigenic sperm protein (histone-binding)	-1	8.08253	-15.7302	7.04554e-08	2.13803e-06	8.43356
ENSMUSG00000023411	Nfatc4	73181	nuclear factor of activated T cells, cytoplasmic, calcineurin dependent 4	-1.37085	4.92028	-15.6959	7.18182e-08	2.17508e-06	8.80317
ENSMUSG00000020623	Map2k6	26399	mitogen-activated protein kinase kinase 6	-1.53573	4.53831	-15.6914	7.19962e-08	2.17618e-06	8.84631
ENSMUSG00000025980	Hspd1	15510	heat shock protein 1 (chaperonin)	-0.793061	8.87286	-15.6782	7.25306e-08	2.18404e-06	8.3189
ENSMUSG00000028412	Slc44a1	100434	solute carrier family 44, member 1	1.0058	7.09155	15.6744	7.26829e-08	2.18404e-06	8.50118
ENSMUSG00000029135	Fosl2	14284	fos-like antigen 2	2.01986	3.77808	15.6761	7.2614e-08	2.18404e-06	8.8891
ENSMUSG00000021835	Bmp4	12159	bone morphogenetic protein 4	1.74523	6.97526	15.6676	7.29584e-08	2.18804e-06	8.52117
ENSMUSG00000068115	Ninl	78177	ninein-like	-1.59989	5.06799	-15.6567	7.34062e-08	2.19718e-06	8.76893
ENSMUSG00000062785	Kcnc3	16504	potassium voltage gated channel, Shaw-related subfamily, member 3	4.2233	1.65885	15.6503	7.36712e-08	2.20082e-06	8.44646
ENSMUSG00000030091	Nup210	54563	nucleoporin 210	-0.834758	7.48351	-15.6356	7.42784e-08	2.21465e-06	8.43692
ENSMUSG00000024665	Fads2	56473	fatty acid desaturase 2	-1.09054	7.08021	-15.6303	7.44987e-08	2.21691e-06	8.47902
ENSMUSG00000034220	Gpc1	14733	glypican 1	-0.993449	7.39885	-15.6236	7.47801e-08	2.22098e-06	8.44008
ENSMUSG00000039234	Sec24d	69608	Sec24 related gene family, member D (S. cerevisiae)	1.40649	5.95235	15.6117	7.52784e-08	2.23147e-06	8.60989
ENSMUSG00000021469	Msx2	17702	msh homeobox 2	-2.87892	1.99345	-15.5949	7.59921e-08	2.24396e-06	8.64676
ENSMUSG00000031562	Dctd	320685	dCMP deaminase	-1.15613	5.69447	-15.5959	7.59468e-08	2.24396e-06	8.63474
ENSMUSG00000032394	Igdcc3	19289	immunoglobulin superfamily, DCC subclass, member 3	-7.20316	3.93554	-15.5864	7.63533e-08	2.2503e-06	8.67583
ENSMUSG00000030659	Nucb2	53322	nucleobindin 2	1.24941	5.3375	15.5705	7.70382e-08	2.26613e-06	8.66594
ENSMUSG00000004040	Stat3	20848	signal transducer and activator of transcription 3	1.49898	5.50889	15.5496	7.79512e-08	2.28861e-06	8.63708
ENSMUSG00000093930	Hmgcs1	208715	3-hydroxy-3-methylglutaryl-Coenzyme A synthase 1	-1.2802	7.80958	-15.5333	7.86675e-08	2.29418e-06	8.34529
ENSMUSG00000054604	Cggbp1	106143	CGG triplet repeat binding protein 1	0.733197	7.97	15.5284	7.8888e-08	2.29418e-06	8.31913
ENSMUSG00000026147	Col9a1	12839	collagen, type IX, alpha 1	2.33613	5.31049	15.532	7.87265e-08	2.29418e-06	8.68417
ENSMUSG00000032911	Cspg4	121021	chondroitin sulfate proteoglycan 4	2.52674	3.20835	15.5395	7.83941e-08	2.29418e-06	8.81112
ENSMUSG00000042510	AA986860	212439	expressed sequence AA986860	3.24553	4.49183	15.5303	7.88005e-08	2.29418e-06	8.78973
ENSMUSG00000040463	Mybbp1a	18432	MYB binding protein (P160) 1a	-0.788281	8.53975	-15.5241	7.9078e-08	2.29536e-06	8.25944
ENSMUSG00000026727	Rsu1	20163	Ras suppressor protein 1	1.11782	6.19485	15.5142	7.95185e-08	2.30087e-06	8.51122
ENSMUSG00000022018	Rgcc	66214	regulator of cell cycle	3.86963	3.46056	15.5132	7.95676e-08	2.30087e-06	8.78821
ENSMUSG00000078640	Gm11627	NA	predicted gene 11627	2.71889	2.32518	15.4962	8.03312e-08	2.31858e-06	8.69086
ENSMUSG00000031548	Sfrp1	20377	secreted frizzled-related protein 1	-3.20255	1.83993	-15.4849	8.0848e-08	2.32467e-06	8.52297
ENSMUSG00000028179	Cth	107869	cystathionase (cystathionine gamma-lyase)	-2.11199	3.42865	-15.4816	8.09962e-08	2.32467e-06	8.78485
ENSMUSG00000035529	Prdm4	72843	PR domain containing 4	-1.05129	6.87898	-15.485	8.08427e-08	2.32467e-06	8.41236
ENSMUSG00000036853	Mcoln3	171166	mucolipin 3	-3.44671	2.92921	-15.4698	8.15407e-08	2.33593e-06	8.72393
ENSMUSG00000053687	Dpep2	319446	dipeptidase 2	2.20662	3.03015	15.4571	8.21259e-08	2.34831e-06	8.76145
ENSMUSG00000001802	Lrp3	435965	low density lipoprotein receptor-related protein 3	-3.82149	2.4332	-15.4357	8.31261e-08	2.35629e-06	8.59889
ENSMUSG00000064325	Hhip	15245	Hedgehog-interacting protein	-3.36021	2.96776	-15.4346	8.31814e-08	2.35629e-06	8.71328
ENSMUSG00000017969	Ptgis	19223	prostaglandin I2 (prostacyclin) synthase	-2.72239	3.20425	-15.4283	8.3479e-08	2.35629e-06	8.74508
ENSMUSG00000025764	Jade1	269424	jade family PHD finger 1	-1.27018	5.0276	-15.4461	8.26404e-08	2.35629e-06	8.63945
ENSMUSG00000057469	E2f6	50496	E2F transcription factor 6	-0.979718	6.73981	-15.431	8.33491e-08	2.35629e-06	8.39422
ENSMUSG00000048970	C1galt1c1	59048	C1GALT1-specific chaperone 1	1.4007	4.7364	15.4438	8.27474e-08	2.35629e-06	8.67244
ENSMUSG00000027015	Cybrd1	73649	cytochrome b reductase 1	4.6555	2.79626	15.4384	8.30003e-08	2.35629e-06	8.6254
ENSMUSG00000025776	Crispld1	83691	cysteine-rich secretory protein LCCL domain containing 1	-4.47986	1.52807	-15.4128	8.42157e-08	2.37272e-06	8.21966
ENSMUSG00000027882	Stxbp3	20912	syntaxin binding protein 3	1.07322	5.7658	15.3932	8.5157e-08	2.39484e-06	8.4943
ENSMUSG00000058454	Dhcr7	13360	7-dehydrocholesterol reductase	-1.64652	6.13063	-15.3865	8.54791e-08	2.39612e-06	8.46445
ENSMUSG00000041415	Dicer1	192119	dicer 1, ribonuclease type III	-1.21889	6.28228	-15.3858	8.55144e-08	2.39612e-06	8.42922
ENSMUSG00000044254	Pcsk9	100102	proprotein convertase subtilisin/kexin type 9	-3.38274	3.65587	-15.3455	8.7497e-08	2.44721e-06	8.70695
ENSMUSG00000030844	Rgs10	67865	regulator of G-protein signalling 10	5.91704	0.687889	15.299	8.98502e-08	2.50846e-06	7.48152
ENSMUSG00000030551	Nr2f2	11819	nuclear receptor subfamily 2, group F, member 2	-2.00537	5.99736	-15.2951	9.00539e-08	2.50958e-06	8.44261
ENSMUSG00000032262	Elovl4	83603	elongation of very long chain fatty acids (FEN1/Elo2, SUR4/Elo3, yeast)-like 4	-4.31371	2.27657	-15.2918	9.02203e-08	2.50966e-06	8.44243
ENSMUSG00000028484	Psip1	101739	PC4 and SFRS1 interacting protein 1	-0.856103	7.93744	-15.2573	9.20179e-08	2.55504e-06	8.15714
ENSMUSG00000061887	Ssbp3	72475	single-stranded DNA binding protein 3	-1.01418	6.41668	-15.2507	9.23671e-08	2.55852e-06	8.3237
ENSMUSG00000028618	Tmem59	56374	transmembrane protein 59	0.829166	8.17271	15.2487	9.24767e-08	2.55852e-06	8.12598
ENSMUSG00000037072	Selenof	93684	selenoprotein F	0.926196	8.37962	15.2179	9.41248e-08	2.59944e-06	8.08588
ENSMUSG00000034919	Ttc22	230576	tetratricopeptide repeat domain 22	6.59105	-2.67176	15.2126	9.44094e-08	2.60262e-06	6.24106
ENSMUSG00000039994	Timeless	21853	timeless circadian clock 1	-0.958766	6.7997	-15.2068	9.47242e-08	2.60617e-06	8.24875
ENSMUSG00000028530	Jak1	16451	Janus kinase 1	0.96353	6.84975	15.204	9.48777e-08	2.60617e-06	8.23887
ENSMUSG00000037712	Fermt2	218952	fermitin family member 2	0.969238	6.47926	15.174	9.65263e-08	2.64672e-06	8.26359
ENSMUSG00000025937	Lactb2	212442	lactamase, beta 2	1.14956	5.67433	15.1626	9.71652e-08	2.65949e-06	8.36798
ENSMUSG00000023018	Smarcd1	83797	SWI/SNF related, matrix associated, actin dependent regulator of chromatin, subfamily d, member 1	-1.10858	6.76178	-15.1565	9.75033e-08	2.66399e-06	8.22436
ENSMUSG00000018899	Irf1	16362	interferon regulatory factor 1	1.61948	4.48794	15.1498	9.78859e-08	2.66969e-06	8.52967
ENSMUSG00000057554	Lgals8	56048	lectin, galactose binding, soluble 8	1.68798	4.51337	15.1388	9.85047e-08	2.68181e-06	8.52196
ENSMUSG00000022679	Mpv17l	93734	Mpv17 transgene, kidney disease mutant-like	1.56297	4.36803	15.1339	9.87861e-08	2.68471e-06	8.53128
ENSMUSG00000001986	Gria3	53623	glutamate receptor, ionotropic, AMPA3 (alpha 3)	-3.65571	1.80303	-15.1141	9.99201e-08	2.71073e-06	8.28643
ENSMUSG00000001525	Tubb5	22154	tubulin, beta 5 class I	-0.591772	9.80696	-15.101	1.00678e-07	2.72647e-06	7.85645
ENSMUSG00000079481	Nhsl2	100042480	NHS-like 2	-3.37228	3.53712	-15.0978	1.00865e-07	2.72674e-06	8.56503
ENSMUSG00000079022	Col22a1	69700	collagen, type XXII, alpha 1	-4.32257	1.92428	-15.0814	1.01826e-07	2.74305e-06	8.23205
ENSMUSG00000032369	Plscr1	22038	phospholipid scramblase 1	1.12687	5.65576	15.0834	1.01713e-07	2.74305e-06	8.32128
ENSMUSG00000018800	Abca5	217265	ATP-binding cassette, sub-family A (ABC1), member 5	2.66472	2.23613	15.0777	1.02045e-07	2.74413e-06	8.46005
ENSMUSG00000031505	Naxd	69225	NAD(P)HX dehydratase	0.968843	6.90279	15.0304	1.04883e-07	2.81552e-06	8.12453
ENSMUSG00000038526	Car14	23831	carbonic anhydrase 14	-7.59684	2.33877	-15.0202	1.05508e-07	2.82703e-06	7.80888
ENSMUSG00000028982	Slc25a33	70556	solute carrier family 25, member 33	-1.79556	4.22016	-15.0174	1.0568e-07	2.82703e-06	8.48249
ENSMUSG00000016495	Plgrkt	67759	plasminogen receptor, C-terminal lysine transmembrane protein	1.39273	4.39017	15.0074	1.06297e-07	2.83858e-06	8.44993
ENSMUSG00000046668	Cxxc5	67393	CXXC finger 5	-2.09073	4.86802	-15.0038	1.06518e-07	2.83955e-06	8.41796
ENSMUSG00000046727	Cystm1	66060	cysteine-rich transmembrane module containing 1	0.964259	6.93122	14.9995	1.06784e-07	2.84171e-06	8.10182
ENSMUSG00000040997	Abhd4	105501	abhydrolase domain containing 4	1.09907	6.07371	14.9895	1.0741e-07	2.85344e-06	8.20352
ENSMUSG00000045932	Ifit2	15958	interferon-induced protein with tetratricopeptide repeats 2	-1.47345	5.32994	-14.98	1.08005e-07	2.86428e-06	8.32176
ENSMUSG00000039607	Rbms3	207181	RNA binding motif, single stranded interacting protein	1.67019	5.48963	14.9736	1.08412e-07	2.86516e-06	8.29464
ENSMUSG00000001911	Nfix	18032	nuclear factor I/X	3.9942	2.94291	14.9757	1.08279e-07	2.86516e-06	8.44509
ENSMUSG00000036940	Kdm1a	99982	lysine (K)-specific demethylase 1A	-0.798633	7.94833	-14.9625	1.09113e-07	2.87382e-06	7.97013
ENSMUSG00000008601	Rab25	53868	RAB25, member RAS oncogene family	1.23283	5.34033	14.9654	1.08931e-07	2.87382e-06	8.29692
ENSMUSG00000025037	Maoa	17161	monoamine oxidase A	1.14892	6.83946	14.9448	1.10246e-07	2.89371e-06	8.07988
ENSMUSG00000024900	Cpt1a	12894	carnitine palmitoyltransferase 1a, liver	2.97491	4.03303	14.9469	1.10113e-07	2.89371e-06	8.46785
ENSMUSG00000037965	Zc3h7a	106205	zinc finger CCCH type containing 7 A	1.0517	6.64985	14.9344	1.10916e-07	2.90621e-06	8.0942
ENSMUSG00000026946	Nmi	64685	N-myc (and STAT) interactor	2.87532	2.84006	14.9316	1.111e-07	2.90621e-06	8.44724
ENSMUSG00000026646	Suv39h2	64707	suppressor of variegation 3-9 homolog 2 (Drosophila)	-1.22986	5.58776	-14.8988	1.13252e-07	2.95243e-06	8.22554
ENSMUSG00000040652	Oaz2	18247	ornithine decarboxylase antizyme 2	0.826253	8.12439	14.9009	1.13112e-07	2.95243e-06	7.91157
ENSMUSG00000041608	Entpd3	215446	ectonucleoside triphosphate diphosphohydrolase 3	-1.08737	6.47409	-14.8875	1.14001e-07	2.96692e-06	8.0909
ENSMUSG00000024997	Prdx3	11757	peroxiredoxin 3	1.10445	6.7004	14.8722	1.15027e-07	2.98857e-06	8.0496
ENSMUSG00000017667	Zfp334	228876	zinc finger protein 334	-1.35115	5.66973	-14.868	1.15317e-07	2.98861e-06	8.19863
ENSMUSG00000026972	Arrdc1	215705	arrestin domain containing 1	0.782503	7.76815	14.8665	1.15418e-07	2.98861e-06	7.92631
ENSMUSG00000029657	Hsph1	15505	heat shock 105kDa/110kDa protein 1	-1.069	7.09588	-14.8565	1.16092e-07	2.99595e-06	7.99655
ENSMUSG00000040596	Pogk	71592	pogo transposable element with KRAB domain	-1.06025	6.23526	-14.8566	1.16091e-07	2.99595e-06	8.10221
ENSMUSG00000032735	Ablim3	319713	actin binding LIM protein family, member 3	-3.09341	2.81688	-14.8519	1.16411e-07	2.99916e-06	8.38937
ENSMUSG00000024732	Ccdc86	108673	coiled-coil domain containing 86	-1.02975	5.58874	-14.833	1.17706e-07	3.02743e-06	8.17798
ENSMUSG00000016179	Camk1g	215303	calcium/calmodulin-dependent protein kinase I gamma	-2.27045	3.51942	-14.8229	1.18413e-07	3.03281e-06	8.40666
ENSMUSG00000022120	Rnf219	72486	ring finger protein 219	-0.936329	6.55157	-14.8215	1.18508e-07	3.03281e-06	8.03607
ENSMUSG00000023175	Bsg	12215	basigin	0.716661	9.33071	14.8238	1.18344e-07	3.03281e-06	7.73303
ENSMUSG00000063904	Dpp3	75221	dipeptidylpeptidase 3	-0.724034	8.25221	-14.8138	1.19044e-07	3.0408e-06	7.84308
ENSMUSG00000030793	Pycard	66824	PYD and CARD domain containing	2.24452	2.81208	14.8114	1.19216e-07	3.0408e-06	8.389
ENSMUSG00000042042	Csgalnact2	78752	chondroitin sulfate N-acetylgalactosaminyltransferase 2	1.39216	5.57585	14.8081	1.19449e-07	3.04169e-06	8.16915
ENSMUSG00000029103	Lrpap1	16976	low density lipoprotein receptor-related protein associated protein 1	0.903159	8.10267	14.7983	1.20137e-07	3.05415e-06	7.84856
ENSMUSG00000032883	Acsl3	74205	acyl-CoA synthetase long-chain family member 3	-1.07367	7.16132	-14.7769	1.21666e-07	3.07267e-06	7.93855
ENSMUSG00000003051	Elf3	13710	E74-like factor 3	1.30106	5.39242	14.7849	1.21087e-07	3.07267e-06	8.17862
ENSMUSG00000032000	Birc3	11796	baculoviral IAP repeat-containing 3	2.08355	3.46992	14.7795	1.21474e-07	3.07267e-06	8.38036
ENSMUSG00000041143	Tmco4	77056	transmembrane and coiled-coil domains 4	2.43634	3.48524	14.7802	1.21425e-07	3.07267e-06	8.38197
ENSMUSG00000031093	Dock11	75974	dedicator of cytokinesis 11	-1.97372	4.45622	-14.7631	1.22655e-07	3.09256e-06	8.3117
ENSMUSG00000026077	Npas2	18143	neuronal PAS domain protein 2	2.71919	2.41296	14.7323	1.24914e-07	3.14435e-06	8.29736
ENSMUSG00000026421	Csrp1	13007	cysteine and glycine-rich protein 1	1.43161	6.50193	14.7026	1.27124e-07	3.18433e-06	7.9731
ENSMUSG00000022575	Gsdmd	69146	gasdermin D	3.09713	1.74943	14.707	1.26794e-07	3.18433e-06	8.13836
ENSMUSG00000030351	Tspan11	68498	tetraspanin 11	3.95979	2.88877	14.7047	1.26972e-07	3.18433e-06	8.29139
ENSMUSG00000031770	Herpud1	64209	homocysteine-inducible, endoplasmic reticulum stress-inducible, ubiquitin-like domain member 1	1.14885	6.21366	14.6884	1.28206e-07	3.20096e-06	7.99532
ENSMUSG00000048489	8430408G22Rik	213393	RIKEN cDNA 8430408G22 gene	3.37175	2.38943	14.688	1.28233e-07	3.20096e-06	8.24325
ENSMUSG00000053093	Myh7	140781	myosin, heavy polypeptide 7, cardiac muscle, beta	4.5109	3.60638	14.6856	1.28414e-07	3.20096e-06	8.31988
ENSMUSG00000022962	Gart	14450	phosphoribosylglycinamide formyltransferase	-0.755494	7.84778	-14.6786	1.28949e-07	3.20391e-06	7.79858
ENSMUSG00000029153	Ociad2	433904	OCIA domain containing 2	1.52035	6.75412	14.6799	1.28855e-07	3.20391e-06	7.9281
ENSMUSG00000004891	Nes	18008	nestin	-2.49443	3.14123	-14.6652	1.29985e-07	3.21923e-06	8.31339
ENSMUSG00000071379	Hpcal1	53602	hippocalcin-like 1	1.34799	6.1238	14.6661	1.29912e-07	3.21923e-06	7.99837
ENSMUSG00000020898	Ctc1	68964	CTS telomere maintenance complex component 1	-0.839702	7.57086	-14.6558	1.30708e-07	3.23192e-06	7.81403
ENSMUSG00000086152	Gm11454	NA	predicted gene 11454	-6.44043	-2.48364	-14.6448	1.31566e-07	3.24e-06	6.11531
ENSMUSG00000043088	Il17re	57890	interleukin 17 receptor E	1.55588	5.47314	14.6435	1.31668e-07	3.24e-06	8.08568
ENSMUSG00000073408	Dpcr1	268949	diffuse panbronchiolitis critical region 1 (human)	3.2405	1.80316	14.6479	1.31324e-07	3.24e-06	8.11132
ENSMUSG00000022436	Sh3bp1	20401	SH3-domain binding protein 1	-1.11056	6.65287	-14.6289	1.32817e-07	3.26304e-06	7.90343
ENSMUSG00000026701	Prdx6	11758	peroxiredoxin 6	-0.755828	8.61273	-14.6162	1.33829e-07	3.28267e-06	7.67777
ENSMUSG00000023809	Rps6ka2	20112	ribosomal protein S6 kinase, polypeptide 2	-2.07803	5.29073	-14.6131	1.34076e-07	3.28347e-06	8.12203
ENSMUSG00000033737	Fndc3c1	333564	fibronectin type III domain containing 3C1	-7.96493	0.852578	-14.6034	1.34851e-07	3.29551e-06	6.68971
ENSMUSG00000025809	Itgb1	16412	integrin beta 1 (fibronectin receptor beta)	0.615052	9.43568	14.5999	1.35135e-07	3.29551e-06	7.57573
ENSMUSG00000039813	Tbc1d2	381605	TBC1 domain family, member 2	2.00619	3.36751	14.599	1.35211e-07	3.29551e-06	8.27482
ENSMUSG00000046794	Ppp1r3b	244416	protein phosphatase 1, regulatory (inhibitor) subunit 3B	0.771286	9.02467	14.5935	1.3565e-07	3.30097e-06	7.61789
ENSMUSG00000058392	Rrp1b	72462	ribosomal RNA processing 1 homolog B (S. cerevisiae)	-0.972922	6.80936	-14.557	1.38642e-07	3.36726e-06	7.83565
ENSMUSG00000029188	Slc34a2	20531	solute carrier family 34 (sodium phosphate), member 2	9.86364	3.34912	14.5549	1.38813e-07	3.36726e-06	7.60502
ENSMUSG00000002797	Ggct	110175	gamma-glutamyl cyclotransferase	-1.932	3.46621	-14.5195	1.41795e-07	3.43418e-06	8.22545
ENSMUSG00000069833	Ahnak	66395	AHNAK nucleoprotein (desmoyokin)	2.63859	4.84731	14.5148	1.42188e-07	3.43827e-06	8.13031
ENSMUSG00000029664	Tfpi2	21789	tissue factor pathway inhibitor 2	-7.18153	-2.20843	-14.4966	1.43754e-07	3.46522e-06	6.14609
ENSMUSG00000032481	Smarcc1	20588	SWI/SNF related, matrix associated, actin dependent regulator of chromatin, subfamily c, member 1	-0.891968	8.29337	-14.499	1.43549e-07	3.46522e-06	7.63564
ENSMUSG00000038192	Cer1	12622	cerberus 1, DAN family BMP antagonist	-5.31879	2.4183	-14.4883	1.44473e-07	3.46622e-06	7.96137
ENSMUSG00000026655	Fam107b	66540	family with sequence similarity 107, member B	-1.15217	5.34719	-14.4907	1.44265e-07	3.46622e-06	8.00032
ENSMUSG00000052837	Junb	16477	jun B proto-oncogene	3.14457	4.37546	14.4904	1.44291e-07	3.46622e-06	8.17475
ENSMUSG00000030824	Nucb1	18220	nucleobindin 1	0.847407	7.78691	14.47	1.46069e-07	3.49118e-06	7.66849
ENSMUSG00000018672	Copz2	56358	coatomer protein complex, subunit zeta 2	1.70811	4.05577	14.4707	1.46007e-07	3.49118e-06	8.15805
ENSMUSG00000027901	Dennd2d	72121	DENN/MADD domain containing 2D	1.95953	5.13263	14.466	1.46423e-07	3.49118e-06	8.03704
ENSMUSG00000030220	Arhgdib	11857	Rho, GDP dissociation inhibitor (GDI) beta	3.19458	3.33967	14.4676	1.46284e-07	3.49118e-06	8.19812
ENSMUSG00000059588	Calcrl	54598	calcitonin receptor-like	-6.49246	2.92747	-14.4552	1.47377e-07	3.50848e-06	7.94278
ENSMUSG00000050910	Cdr2l	237988	cerebellar degeneration-related protein 2-like	-1.29238	5.21528	-14.4445	1.48334e-07	3.52035e-06	7.99457
ENSMUSG00000024782	Ak3	56248	adenylate kinase 3	1.00886	6.86309	14.446	1.48199e-07	3.52035e-06	7.75501
ENSMUSG00000041577	Prelp	116847	proline arginine-rich end leucine-rich repeat	1.94676	5.33505	14.4382	1.48897e-07	3.52373e-06	7.98985
ENSMUSG00000074259	Gramd2	546134	GRAM domain containing 2	3.37096	4.10304	14.4378	1.48935e-07	3.52373e-06	8.16362
ENSMUSG00000017057	Il13ra1	16164	interleukin 13 receptor, alpha 1	-1.35049	6.86369	-14.4348	1.49198e-07	3.52452e-06	7.75628
ENSMUSG00000107622	Gm44205	NA	predicted gene, 44205	-6.47418	-2.55009	-14.4181	1.50708e-07	3.54834e-06	6.04298
ENSMUSG00000032064	Dixdc1	330938	DIX domain containing 1	-1.8099	4.03482	-14.416	1.509e-07	3.54834e-06	8.1306
ENSMUSG00000037709	Fam13a	58909	family with sequence similarity 13, member A	1.70335	6.12287	14.4183	1.50695e-07	3.54834e-06	7.85052
ENSMUSG00000033016	Nfatc1	18018	nuclear factor of activated T cells, cytoplasmic, calcineurin dependent 1	3.67391	3.23685	14.4097	1.5148e-07	3.55653e-06	8.157
ENSMUSG00000025287	Acot9	56360	acyl-CoA thioesterase 9	1.6212	5.09411	14.4066	1.51767e-07	3.55783e-06	7.99218
ENSMUSG00000028469	Npr2	230103	natriuretic peptide receptor 2	2.6452	3.69764	14.385	1.53757e-07	3.59899e-06	8.13983
ENSMUSG00000040525	Cblc	80794	Casitas B-lineage lymphoma c	1.75876	4.3338	14.3812	1.54111e-07	3.60178e-06	8.07662
ENSMUSG00000039115	Itga9	104099	integrin alpha 9	-1.60263	5.28108	-14.3623	1.55887e-07	3.63776e-06	7.94317
ENSMUSG00000030393	Zik1	22775	zinc finger protein interacting with K protein 1	-1.4	5.5883	-14.3586	1.56236e-07	3.64037e-06	7.88752
ENSMUSG00000028479	Gne	50798	glucosamine (UDP-N-acetyl)-2-epimerase/N-acetylmannosamine kinase	1.65657	6.55157	14.356	1.5648e-07	3.64053e-06	7.74784
ENSMUSG00000030671	Pde3b	18576	phosphodiesterase 3B, cGMP-inhibited	-1.49624	5.71428	-14.3479	1.57248e-07	3.65258e-06	7.86579
ENSMUSG00000102252	Snrpn	20646	small nuclear ribonucleoprotein N	-1.13097	5.31554	-14.3456	1.57474e-07	3.65258e-06	7.91087
ENSMUSG00000009418	Nav1	215690	neuron navigator 1	-1.42057	6.08315	-14.3389	1.5811e-07	3.66155e-06	7.80224
ENSMUSG00000022186	Oxct1	67041	3-oxoacid CoA transferase 1	1.00975	7.77417	14.3353	1.5846e-07	3.66155e-06	7.5825
ENSMUSG00000025862	Stag2	20843	stromal antigen 2	1.02759	7.32856	14.3316	1.58814e-07	3.66155e-06	7.6282
ENSMUSG00000026922	Agpat2	67512	1-acylglycerol-3-phosphate O-acyltransferase 2 (lysophosphatidic acid acyltransferase, beta)	1.30155	5.16832	14.3338	1.58598e-07	3.66155e-06	7.92447
ENSMUSG00000009585	Apobec3	80287	apolipoprotein B mRNA editing enzyme, catalytic polypeptide 3	2.41805	5.0538	14.3282	1.59143e-07	3.66364e-06	7.97753
ENSMUSG00000054720	Lrrc8c	100604	leucine rich repeat containing 8 family, member C	1.69453	5.45314	14.2909	1.62794e-07	3.73647e-06	7.86687
ENSMUSG00000038213	Tapbpl	213233	TAP binding protein-like	1.69522	4.01353	14.2915	1.62734e-07	3.73647e-06	8.04947
ENSMUSG00000027985	Lef1	16842	lymphoid enhancer binding factor 1	-3.38832	2.39494	-14.2824	1.63633e-07	3.75013e-06	8.00712
ENSMUSG00000026483	Fam129a	63913	family with sequence similarity 129, member A	4.03574	2.44125	14.2742	1.64459e-07	3.76344e-06	7.98753
ENSMUSG00000004661	Arid3b	56380	AT rich interactive domain 3B (BRIGHT-like)	-2.16556	5.30532	-14.2681	1.6507e-07	3.7718e-06	7.90383
ENSMUSG00000060002	Chpt1	212862	choline phosphotransferase 1	1.29595	6.13216	14.252	1.667e-07	3.79212e-06	7.72719
ENSMUSG00000079442	St6galnac4	20448	ST6 (alpha-N-acetyl-neuraminyl-2,3-beta-galactosyl-1,3)-N-acetylgalactosaminide alpha-2,6-sialyltransferase 4	2.69894	4.35197	14.2555	1.66343e-07	3.79212e-06	8.01843
ENSMUSG00000040260	Daam2	76441	dishevelled associated activator of morphogenesis 2	2.80596	3.71578	14.2521	1.66688e-07	3.79212e-06	8.05909
ENSMUSG00000025357	Dgka	13139	diacylglycerol kinase, alpha	2.24563	2.86038	14.2455	1.67357e-07	3.80143e-06	8.06142
ENSMUSG00000026594	Ralgps2	78255	Ral GEF with PH domain and SH3 binding motif 2	-1.05921	5.50967	-14.2293	1.6902e-07	3.83354e-06	7.80377
ENSMUSG00000042306	S100a14	66166	S100 calcium binding protein A14	7.99947	-0.635044	14.2247	1.69494e-07	3.83862e-06	6.18045
ENSMUSG00000045071	E130308A19Rik	230259	RIKEN cDNA E130308A19 gene	-1.00047	5.94152	-14.2162	1.70378e-07	3.85295e-06	7.72839
ENSMUSG00000032232	Cgnl1	68178	cingulin-like 1	-0.887492	6.23589	-14.2113	1.70896e-07	3.85898e-06	7.68079
ENSMUSG00000027900	Dram2	67171	DNA-damage regulated autophagy modulator 2	1.44593	5.50965	14.2051	1.71541e-07	3.86786e-06	7.7938
ENSMUSG00000020811	Wscd1	216881	WSC domain containing 1	-3.02506	3.09523	-14.1963	1.72473e-07	3.86967e-06	8.03111
ENSMUSG00000028246	Faxc	76132	failed axon connections homolog	-1.45726	5.13729	-14.1984	1.7225e-07	3.86967e-06	7.85281
ENSMUSG00000028173	Wls	68151	wntless homolog (Drosophila)	0.874381	8.61151	14.1974	1.72354e-07	3.86967e-06	7.40134
ENSMUSG00000037455	Slc18b1	76306	solute carrier family 18, subfamily B, member 1	1.34045	4.9694	14.1931	1.72801e-07	3.86967e-06	7.86349
ENSMUSG00000063354	Slc39a4	72027	solute carrier family 39 (zinc transporter), member 4	2.08287	4.99638	14.1924	1.72882e-07	3.86967e-06	7.88417
ENSMUSG00000018583	G3bp1	27041	GTPase activating protein (SH3 domain) binding protein 1	-0.577887	9.33885	-14.1826	1.73919e-07	3.88723e-06	7.31118
ENSMUSG00000060962	Dmkn	73712	dermokine	7.26974	-2.33704	14.1679	1.75492e-07	3.91669e-06	6.02665
ENSMUSG00000027848	Olfml3	99543	olfactomedin-like 3	-2.97228	2.80146	-14.1547	1.76921e-07	3.94285e-06	7.99307
ENSMUSG00000026640	Plxna2	18845	plexin A2	2.11606	4.61126	14.151	1.77322e-07	3.94607e-06	7.90797
ENSMUSG00000005370	Msh6	17688	mutS homolog 6	-0.743859	8.02909	-14.148	1.77656e-07	3.94721e-06	7.43027
ENSMUSG00000029810	Tmem176b	65963	transmembrane protein 176B	1.18536	7.2043	14.1458	1.77888e-07	3.94721e-06	7.52034
ENSMUSG00000024610	Cd74	16149	CD74 antigen (invariant polypeptide of major histocompatibility complex, class II antigen-associated)	2.27987	3.99205	14.1422	1.78286e-07	3.95034e-06	7.96705
ENSMUSG00000028357	Kif12	16552	kinesin family member 12	-2.12426	5.72897	-14.1368	1.78875e-07	3.95768e-06	7.75283
ENSMUSG00000025935	Tram1	72265	translocating chain-associating membrane protein 1	0.738497	8.34288	14.1221	1.80505e-07	3.988e-06	7.37885
ENSMUSG00000029108	Pcdh7	54216	protocadherin 7	-4.9353	1.97799	-14.1197	1.80775e-07	3.98821e-06	7.6949
ENSMUSG00000003070	Efna2	13637	ephrin A2	-1.77972	4.34051	-14.1168	1.81089e-07	3.98941e-06	7.91329
ENSMUSG00000027298	Tyro3	22174	TYRO3 protein tyrosine kinase 3	-0.921593	6.64617	-14.1055	1.82355e-07	4.01079e-06	7.55784
ENSMUSG00000058587	Tmod3	50875	tropomodulin 3	1.02465	7.77251	14.1035	1.82582e-07	4.01079e-06	7.42849
ENSMUSG00000051043	Gprc5c	70355	G protein-coupled receptor, family C, group 5, member C	-0.988521	7.82265	-14.0912	1.83969e-07	4.03549e-06	7.41647
ENSMUSG00000029635	Cdk8	264064	cyclin-dependent kinase 8	-1.04719	5.8134	-14.0815	1.85079e-07	4.05404e-06	7.65995
ENSMUSG00000028673	Fuca1	71665	fucosidase, alpha-L- 1, tissue	1.07586	6.43672	14.0739	1.85949e-07	4.0673e-06	7.56266
ENSMUSG00000035273	Hpse	15442	heparanase	1.99972	3.48242	14.0602	1.87523e-07	4.09227e-06	7.94205
ENSMUSG00000059668	Krt4	16682	keratin 4	7.40566	-2.27421	14.0594	1.87624e-07	4.09227e-06	6.00525
ENSMUSG00000042808	Gpx2	14776	glutathione peroxidase 2	-2.0422	4.83046	-14.011	1.93321e-07	4.19283e-06	7.79545
ENSMUSG00000002844	Adprh	11544	ADP-ribosylarginine hydrolase	-1.37581	5.9846	-14.0118	1.93226e-07	4.19283e-06	7.59896
ENSMUSG00000026090	2010300C02Rik	72097	RIKEN cDNA 2010300C02 gene	1.76374	5.11944	14.011	1.93326e-07	4.19283e-06	7.73627
ENSMUSG00000036264	Fstl4	320027	follistatin-like 4	5.64001	3.40257	14.0152	1.92816e-07	4.19283e-06	7.87858
ENSMUSG00000026380	Tfcp2l1	81879	transcription factor CP2-like 1	3.02276	2.82935	14.0033	1.94242e-07	4.20675e-06	7.90696
ENSMUSG00000031209	Heph	15203	hephaestin	-1.9396	5.27168	-13.9916	1.95668e-07	4.22572e-06	7.7162
ENSMUSG00000022136	Dnajc3	100037258	DnaJ heat shock protein family (Hsp40) member C3	0.788246	7.31366	13.9924	1.9556e-07	4.22572e-06	7.40149
ENSMUSG00000021130	Galnt16	108760	UDP-N-acetyl-alpha-D-galactosamine:polypeptide N-acetylgalactosaminyltransferase 16	-3.78921	2.46707	-13.9813	1.96915e-07	4.23134e-06	7.82572
ENSMUSG00000048997	Atxn7l2	72522	ataxin 7-like 2	-1.2966	4.67406	-13.9857	1.96377e-07	4.23134e-06	7.77499
ENSMUSG00000026721	Rabgap1l	29809	RAB GTPase activating protein 1-like	1.5854	4.99279	13.9804	1.97031e-07	4.23134e-06	7.72852
ENSMUSG00000031952	Chst5	56773	carbohydrate (N-acetylglucosamine 6-O) sulfotransferase 5	2.48512	3.88326	13.981	1.96958e-07	4.23134e-06	7.87572
ENSMUSG00000028019	Pdgfc	54635	platelet-derived growth factor, C polypeptide	-0.857668	6.13296	-13.9739	1.97826e-07	4.23656e-06	7.53643
ENSMUSG00000021792	Fam213a	70564	family with sequence similarity 213, member A	1.26846	7.20815	13.9754	1.97637e-07	4.23656e-06	7.40661
ENSMUSG00000072770	Acrbp	54137	proacrosin binding protein	-2.08755	3.72553	-13.9689	1.98442e-07	4.24384e-06	7.87547
ENSMUSG00000042644	Itpr3	16440	inositol 1,4,5-triphosphate receptor 3	1.81538	4.48407	13.9586	1.99713e-07	4.26008e-06	7.79016
ENSMUSG00000084860	2610204G07Rik	NA	RIKEN cDNA 2610204G07 gene	5.39366	0.381654	13.9583	1.99756e-07	4.26008e-06	6.90683
ENSMUSG00000021318	Gli3	14634	GLI-Kruppel family member GLI3	-1.01234	5.89395	-13.9554	2.00117e-07	4.26185e-06	7.56261
ENSMUSG00000026519	Tmem63a	208795	transmembrane protein 63a	2.34287	3.62704	13.9466	2.01214e-07	4.27927e-06	7.86734
ENSMUSG00000030701	Plekhb1	27276	pleckstrin homology domain containing, family B (evectins) member 1	1.31092	5.70774	13.9321	2.03042e-07	4.31219e-06	7.57804
ENSMUSG00000042271	Nxt2	237082	nuclear transport factor 2-like export factor 2	1.59985	5.08964	13.9215	2.04387e-07	4.33475e-06	7.67612
ENSMUSG00000031378	Abcd1	11666	ATP-binding cassette, sub-family D (ALD), member 1	1.39544	5.59382	13.9113	2.05681e-07	4.35618e-06	7.58424
ENSMUSG00000022389	Tef	21685	thyrotroph embryonic factor	1.58265	5.54132	13.9054	2.06451e-07	4.36646e-06	7.59585
ENSMUSG00000030963	Umod	22242	uromodulin	-6.90765	-1.94406	-13.8872	2.08804e-07	4.3681e-06	5.96789
ENSMUSG00000032327	Stra6	20897	stimulated by retinoic acid gene 6	-6.05428	1.92397	-13.89	2.08436e-07	4.3681e-06	7.41118
ENSMUSG00000062393	Dgkk	331374	diacylglycerol kinase kappa	-3.66379	0.886078	-13.8963	2.07616e-07	4.3681e-06	7.37844
ENSMUSG00000039449	Prpf18	67229	pre-mRNA processing factor 18	0.868646	6.94213	13.8984	2.07354e-07	4.3681e-06	7.38018
ENSMUSG00000008206	Cers4	67260	ceramide synthase 4	0.982165	5.88388	13.8898	2.08465e-07	4.3681e-06	7.51356
ENSMUSG00000041559	Fmod	14264	fibromodulin	1.20173	8.72908	13.8929	2.08057e-07	4.3681e-06	7.18461
ENSMUSG00000051236	Msrb3	320183	methionine sulfoxide reductase B3	2.16947	4.10146	13.8882	2.08674e-07	4.3681e-06	7.79373
ENSMUSG00000051439	Cd14	12475	CD14 antigen	3.11933	2.17691	13.8894	2.08518e-07	4.3681e-06	7.77369
ENSMUSG00000030031	Kbtbd8	243574	kelch repeat and BTB (POZ) domain containing 8	-1.84011	3.98161	-13.8683	2.11283e-07	4.41395e-06	7.78886
ENSMUSG00000030352	Tspan9	109246	tetraspanin 9	1.51598	5.54816	13.8657	2.1163e-07	4.41518e-06	7.56525
ENSMUSG00000018983	E2f2	242705	E2F transcription factor 2	1.08461	5.24428	13.8539	2.13199e-07	4.43587e-06	7.5913
ENSMUSG00000040592	Cd79b	15985	CD79B antigen	4.56425	0.512426	13.8543	2.13141e-07	4.43587e-06	7.09133
ENSMUSG00000087500	Gm12426	NA	predicted gene 12426	6.38954	-2.77732	13.8488	2.13878e-07	4.44396e-06	5.81421
ENSMUSG00000025813	Homer2	26557	homer scaffolding protein 2	1.28636	5.13727	13.8445	2.14455e-07	4.44994e-06	7.60715
ENSMUSG00000035671	Zswim4	212168	zinc finger SWIM-type containing 4	-0.929863	6.05189	-13.8375	2.15399e-07	4.45749e-06	7.45789
ENSMUSG00000038086	Hspb2	69253	heat shock protein 2	6.18494	-2.88053	13.8385	2.15271e-07	4.45749e-06	5.77901
ENSMUSG00000040957	Cables1	63955	CDK5 and Abl enzyme substrate 1	-2.21453	3.54668	-13.8304	2.1636e-07	4.46863e-06	7.79827
ENSMUSG00000037706	Cd81	12520	CD81 antigen	0.734694	8.14443	13.8292	2.1652e-07	4.46863e-06	7.20121
ENSMUSG00000006611	Hfe	15216	hemochromatosis	4.21724	2.12475	13.8053	2.19804e-07	4.53033e-06	7.65284
ENSMUSG00000027889	Ampd2	109674	adenosine monophosphate deaminase 2	-0.924717	6.53087	-13.7922	2.21622e-07	4.56166e-06	7.3614
ENSMUSG00000024516	Sec11c	66286	SEC11 homolog C, signal peptidase complex subunit	1.9773	5.78983	13.79	2.21926e-07	4.56182e-06	7.49647
ENSMUSG00000040451	Sgms1	208449	sphingomyelin synthase 1	1.07637	7.80125	13.7831	2.22881e-07	4.56921e-06	7.20862
ENSMUSG00000022415	Syngr1	20972	synaptogyrin 1	1.37895	4.47804	13.7843	2.22725e-07	4.56921e-06	7.66578
ENSMUSG00000028789	Azin2	242669	antizyme inhibitor 2	1.67876	3.77684	13.7704	2.24672e-07	4.59978e-06	7.73635
ENSMUSG00000031934	Panx1	55991	pannexin 1	-1.1287	5.67457	-13.7608	2.26036e-07	4.61642e-06	7.46863
ENSMUSG00000028007	Snx7	76561	sorting nexin 7	1.73047	6.75108	13.7605	2.26086e-07	4.61642e-06	7.32492
ENSMUSG00000026004	Kansl1l	68691	KAT8 regulatory NSL complex subunit 1-like	1.62567	5.78945	13.7567	2.2663e-07	4.62139e-06	7.4588
ENSMUSG00000052949	Rnf157	217340	ring finger protein 157	-2.19997	4.62378	-13.7496	2.27637e-07	4.63577e-06	7.65545
ENSMUSG00000021696	Elovl7	74559	ELOVL family member 7, elongation of long chain fatty acids (yeast)	1.2021	5.38734	13.7437	2.28493e-07	4.64703e-06	7.49801
ENSMUSG00000028565	Nfia	18027	nuclear factor I/A	1.7525	4.61704	13.7356	2.29654e-07	4.66447e-06	7.62507
ENSMUSG00000024935	Slc1a1	20510	solute carrier family 1 (neuronal/epithelial high affinity glutamate transporter, system Xag), member 1	3.93704	0.861498	13.7121	2.331e-07	4.7282e-06	7.2729
ENSMUSG00000031387	Renbp	19703	renin binding protein	1.37871	4.22909	13.7086	2.33611e-07	4.73233e-06	7.64694
ENSMUSG00000007989	Fzd3	14365	frizzled class receptor 3	-1.43553	4.87437	-13.705	2.34148e-07	4.73517e-06	7.5648
ENSMUSG00000047368	Abhd17b	226016	abhydrolase domain containing 17B	0.952711	6.50598	13.7035	2.34369e-07	4.73517e-06	7.3009
ENSMUSG00000026638	Irf6	54139	interferon regulatory factor 6	1.03205	6.17619	13.6994	2.34975e-07	4.74118e-06	7.3439
ENSMUSG00000021036	Sptlc2	20773	serine palmitoyltransferase, long chain base subunit 2	0.794493	6.89224	13.6927	2.35978e-07	4.74894e-06	7.24489
ENSMUSG00000042473	Tbc1d8b	245638	TBC1 domain family, member 8B	2.01964	3.42791	13.6947	2.35678e-07	4.74894e-06	7.71322
ENSMUSG00000021057	Akap5	238276	A kinase (PRKA) anchor protein 5	1.95129	6.98072	13.679	2.38033e-07	4.78403e-06	7.24442
ENSMUSG00000028943	Espn	56226	espin	-1.11436	4.96114	-13.6761	2.38471e-07	4.78657e-06	7.52246
ENSMUSG00000037254	Itih2	16425	inter-alpha trypsin inhibitor, heavy chain 2	-1.95654	4.15919	-13.6486	2.42663e-07	4.85801e-06	7.63121
ENSMUSG00000092083	Kcnb2	98741	potassium voltage gated channel, Shab-related subfamily, member 2	-1.83301	3.41746	-13.6502	2.42411e-07	4.85801e-06	7.68541
ENSMUSG00000027177	Hipk3	15259	homeodomain interacting protein kinase 3	1.22298	6.63215	13.6418	2.43706e-07	4.87253e-06	7.247
ENSMUSG00000054766	Set	56086	SET nuclear oncogene	-0.604215	9.40638	-13.6329	2.45092e-07	4.89387e-06	6.92807
ENSMUSG00000031837	Necab2	117148	N-terminal EF-hand calcium binding protein 2	-3.70519	1.50742	-13.6257	2.46223e-07	4.90854e-06	7.43664
ENSMUSG00000087408	Cers1	14559	ceramide synthase 1	-2.61214	1.84824	-13.6241	2.46466e-07	4.90854e-06	7.58406
ENSMUSG00000019256	Ahr	11622	aryl-hydrocarbon receptor	1.43438	5.1806	13.6213	2.46911e-07	4.91103e-06	7.45495
ENSMUSG00000038791	Scgb3a2	117158	secretoglobin, family 3A, member 2	8.17687	3.19982	13.6091	2.48829e-07	4.94278e-06	7.38123
ENSMUSG00000024172	St6gal2	240119	beta galactoside alpha 2,6 sialyltransferase 2	-6.33985	-1.26318	-13.6066	2.49223e-07	4.94422e-06	5.9054
ENSMUSG00000008153	Clstn3	232370	calsyntenin 3	-1.72351	3.7852	-13.6041	2.4963e-07	4.94499e-06	7.63099
ENSMUSG00000041235	Chd7	320790	chromodomain helicase DNA binding protein 7	-1.61195	6.73572	-13.6023	2.49906e-07	4.94499e-06	7.22083
ENSMUSG00000022892	App	11820	amyloid beta (A4) precursor protein	0.869227	8.82205	13.5888	2.52066e-07	4.9749e-06	6.96311
ENSMUSG00000060477	Irak2	108960	interleukin-1 receptor-associated kinase 2	2.27882	3.29326	13.5906	2.51783e-07	4.9749e-06	7.65402
ENSMUSG00000040848	Sft2d2	108735	SFT2 domain containing 2	0.803164	7.23387	13.561	2.56581e-07	5.05751e-06	7.11513
ENSMUSG00000064267	Hvcn1	74096	hydrogen voltage-gated channel 1	-3.35016	1.04348	-13.5546	2.57629e-07	5.07165e-06	7.298
ENSMUSG00000001663	Gstt1	14871	glutathione S-transferase, theta 1	2.06407	3.42094	13.5507	2.58276e-07	5.07788e-06	7.62126
ENSMUSG00000021756	Il6st	16195	interleukin 6 signal transducer	1.01163	6.50293	13.5418	2.59745e-07	5.09826e-06	7.19081
ENSMUSG00000024978	Gpam	14732	glycerol-3-phosphate acyltransferase, mitochondrial	1.44908	6.15505	13.5404	2.59976e-07	5.09826e-06	7.24884
ENSMUSG00000030739	Myh14	71960	myosin, heavy polypeptide 14	2.60183	6.43054	13.5289	2.61908e-07	5.12959e-06	7.24564
ENSMUSG00000002014	Ssr4	20832	signal sequence receptor, delta	1.0893	6.38865	13.524	2.62719e-07	5.13892e-06	7.19528
ENSMUSG00000027547	Sall4	99377	sal-like 4 (Drosophila)	-8.66992	1.32704	-13.5209	2.6325e-07	5.14275e-06	6.38014
ENSMUSG00000024558	Mapk4	225724	mitogen-activated protein kinase 4	-2.76777	2.54964	-13.5056	2.65843e-07	5.18023e-06	7.58919
ENSMUSG00000056501	Cebpb	12608	CCAAT/enhancer binding protein (C/EBP), beta	1.82012	4.75938	13.5064	2.65701e-07	5.18023e-06	7.4537
ENSMUSG00000022376	Adcy8	11514	adenylate cyclase 8	-8.60566	0.393128	-13.4903	2.68468e-07	5.22475e-06	5.97293
ENSMUSG00000024451	Arap3	106952	ArfGAP with RhoGAP domain, ankyrin repeat and PH domain 3	-2.55641	2.10377	-13.482	2.69899e-07	5.24596e-06	7.53921
ENSMUSG00000005615	Pcyt1a	13026	phosphate cytidylyltransferase 1, choline, alpha isoform	0.977919	6.45841	13.4678	2.7236e-07	5.28708e-06	7.14474
ENSMUSG00000034868	Myl12b	67938	myosin, light chain 12B, regulatory	0.912409	8.1165	13.4629	2.73232e-07	5.29733e-06	6.95121
ENSMUSG00000028583	Pdpn	14726	podoplanin	2.13806	3.93721	13.4594	2.73851e-07	5.30262e-06	7.52626
ENSMUSG00000017631	Abr	109934	active BCR-related gene	-1.24603	6.75593	-13.4461	2.762e-07	5.34136e-06	7.10003
ENSMUSG00000069170	Adgrv1	110789	adhesion G protein-coupled receptor V1	-2.15673	2.51183	-13.4378	2.77682e-07	5.36321e-06	7.5544
ENSMUSG00000037851	Iars	105148	isoleucine-tRNA synthetase	-0.704581	7.93638	-13.4358	2.78028e-07	5.36321e-06	6.95155
ENSMUSG00000085936	2610307P16Rik	NA	RIKEN cDNA 2610307P16 gene	-2.33165	3.8963	-13.4285	2.7934e-07	5.38176e-06	7.51732
ENSMUSG00000075012	Fjx1	14221	four jointed box 1 (Drosophila)	-2.54702	3.66796	-13.4266	2.79693e-07	5.3818e-06	7.53533
ENSMUSG00000035834	Polr3g	67486	polymerase (RNA) III (DNA directed) polypeptide G	-1.37208	4.82482	-13.4208	2.80733e-07	5.39506e-06	7.37761
ENSMUSG00000022433	Csnk1e	27373	casein kinase 1, epsilon	-0.955285	6.95603	-13.4102	2.82664e-07	5.42537e-06	7.04527
ENSMUSG00000007379	Dennd2c	329727	DENN/MADD domain containing 2C	1.82614	4.09454	13.3881	2.86721e-07	5.49638e-06	7.45728
ENSMUSG00000021365	Nedd9	18003	neural precursor cell expressed, developmentally down-regulated gene 9	-1.04191	8.9125	-13.3813	2.87979e-07	5.50675e-06	6.80946
ENSMUSG00000039611	Tmem246	67063	transmembrane protein 246	1.16014	5.57816	13.3816	2.87932e-07	5.50675e-06	7.21835
ENSMUSG00000019927	Ube2d1	216080	ubiquitin-conjugating enzyme E2D 1	-0.944225	5.96722	-13.3764	2.88898e-07	5.5106e-06	7.15385
ENSMUSG00000031299	Pdha1	18597	pyruvate dehydrogenase E1 alpha 1	0.694758	7.19876	13.3782	2.88572e-07	5.5106e-06	6.99051
ENSMUSG00000046999	1110032F04Rik	68725	RIKEN cDNA 1110032F04 gene	-4.70998	0.833368	-13.3608	2.91824e-07	5.53848e-06	6.94166
ENSMUSG00000025352	Gdf11	14561	growth differentiation factor 11	-2.08177	2.85356	-13.3591	2.92156e-07	5.53848e-06	7.51337
ENSMUSG00000062542	Syt9	60510	synaptotagmin IX	-1.67882	4.05894	-13.3657	2.90906e-07	5.53848e-06	7.44713
ENSMUSG00000068798	Rap1a	109905	RAS-related protein-1a	0.827322	6.51285	13.359	2.92163e-07	5.53848e-06	7.05934
ENSMUSG00000026478	Lamc1	226519	laminin, gamma 1	1.25168	9.02418	13.3629	2.91429e-07	5.53848e-06	6.78402
ENSMUSG00000028328	Tmod1	21916	tropomodulin 1	3.99172	0.798919	13.3571	2.92525e-07	5.53849e-06	7.06189
ENSMUSG00000023051	Tarbp2	21357	TARBP2, RISC loading complex RNA binding subunit	-0.911426	6.12278	-13.3439	2.95033e-07	5.5756e-06	7.10735
ENSMUSG00000017499	Cdc6	23834	cell division cycle 6	-0.864007	7.23136	-13.3422	2.95369e-07	5.5756e-06	6.9647
ENSMUSG00000026853	Crat	12908	carnitine acetyltransferase	0.878906	6.20289	13.3343	2.96884e-07	5.5756e-06	7.08404
ENSMUSG00000034758	Tle6	114606	transducin-like enhancer of split 6	1.30466	5.00231	13.3377	2.96227e-07	5.5756e-06	7.2849
ENSMUSG00000040466	Blvrb	233016	biliverdin reductase B (flavin reductase (NADPH))	1.48043	3.66982	13.3336	2.97026e-07	5.5756e-06	7.45531
ENSMUSG00000026051	1500015O10Rik	78896	RIKEN cDNA 1500015O10 gene	4.69619	1.03036	13.3373	2.96308e-07	5.5756e-06	7.03767
ENSMUSG00000023829	Slc22a1	20517	solute carrier family 22 (organic cation transporter), member 1	8.10581	-1.21583	13.334	2.96941e-07	5.5756e-06	5.85493
ENSMUSG00000028773	Fabp3	14077	fatty acid binding protein 3, muscle and heart	-4.00966	1.96988	-13.3218	2.99308e-07	5.61157e-06	7.3477
ENSMUSG00000109936	Gm45889	NA	predicted gene 45889	-3.73066	1.33621	-13.3192	2.99797e-07	5.61388e-06	7.22047
ENSMUSG00000044934	Zfp367	238673	zinc finger protein 367	0.879233	5.71838	13.313	3.01009e-07	5.6297e-06	7.14059
ENSMUSG00000033721	Vav3	57257	vav 3 oncogene	-1.73584	3.69381	-13.3104	3.01519e-07	5.63028e-06	7.44411
ENSMUSG00000055447	Cd47	16423	CD47 antigen (Rh-related antigen, integrin-associated signal transducer)	0.819693	6.5324	13.3091	3.01773e-07	5.63028e-06	7.02168
ENSMUSG00000021585	Cast	12380	calpastatin	1.30953	5.43459	13.3008	3.03403e-07	5.65383e-06	7.18989
ENSMUSG00000022847	Thpo	21832	thrombopoietin	-4.32736	0.994748	-13.297	3.04155e-07	5.66098e-06	7.02902
ENSMUSG00000034593	Myo5a	17918	myosin VA	-1.05044	5.57918	-13.2895	3.05643e-07	5.6709e-06	7.15705
ENSMUSG00000058013	2017-09-11	52398	septin 11	-0.784684	8.25711	-13.2888	3.05797e-07	5.6709e-06	6.81358
ENSMUSG00000031666	Rbl2	19651	RB transcriptional corepressor like 2	1.777	5.10388	13.2918	3.05188e-07	5.6709e-06	7.25369
ENSMUSG00000019647	Sema6a	20358	sema domain, transmembrane domain (TM), and cytoplasmic domain, (semaphorin) 6A	-1.75016	5.84915	-13.2827	3.07003e-07	5.6802e-06	7.13792
ENSMUSG00000029759	Pon3	269823	paraoxonase 3	2.96845	3.62646	13.2825	3.07038e-07	5.6802e-06	7.44674
ENSMUSG00000055053	Nfic	18029	nuclear factor I/C	1.55356	4.58826	13.2654	3.10482e-07	5.737e-06	7.30502
ENSMUSG00000024511	Rab27b	80718	RAB27B, member RAS oncogene family	1.43256	5.46808	13.2635	3.10867e-07	5.73721e-06	7.16259
ENSMUSG00000056486	Chn1	108699	chimerin 1	-1.52303	4.34919	-13.2601	3.11547e-07	5.74286e-06	7.33886
ENSMUSG00000078652	Psme3	19192	proteaseome (prosome, macropain) activator subunit 3 (PA28 gamma, Ki)	-0.601575	8.18847	-13.2572	3.12154e-07	5.74714e-06	6.79754
ENSMUSG00000063804	Lin28b	380669	lin-28 homolog B (C. elegans)	-7.93537	0.693452	-13.227	3.18354e-07	5.85066e-06	6.10083
ENSMUSG00000075420	Smim6	68528	small integral membrane protein 6	3.38921	3.72907	13.2251	3.18762e-07	5.85066e-06	7.40958
ENSMUSG00000024338	Psmb8	16913	proteasome (prosome, macropain) subunit, beta type 8 (large multifunctional peptidase 7)	6.99595	-1.8313	13.2243	3.18919e-07	5.85066e-06	5.74519
ENSMUSG00000082361	Btc	12223	betacellulin, epidermal growth factor family member	5.07829	0.589982	13.2133	3.2122e-07	5.88584e-06	6.73559
ENSMUSG00000062609	Kcnj15	16516	potassium inwardly-rectifying channel, subfamily J, member 15	4.78178	2.56131	13.2022	3.23567e-07	5.92178e-06	7.34074
ENSMUSG00000020844	Nxn	18230	nucleoredoxin	-2.33828	2.85116	-13.1991	3.24213e-07	5.92654e-06	7.41028
ENSMUSG00000022191	Drosha	14000	drosha, ribonuclease type III	-0.969339	7.32765	-13.1917	3.25798e-07	5.94842e-06	6.84838
ENSMUSG00000019944	Rhobtb1	69288	Rho-related BTB domain containing 1	-1.61251	4.1394	-13.1816	3.2795e-07	5.97351e-06	7.31223
ENSMUSG00000032009	Sesn3	75747	sestrin 3	-1.37522	6.33142	-13.1831	3.27644e-07	5.97351e-06	6.97741
ENSMUSG00000063011	Msln	56047	mesothelin	3.92577	3.22417	13.1781	3.2872e-07	5.98045e-06	7.39637
ENSMUSG00000044548	Dact1	59036	dishevelled-binding antagonist of beta-catenin 1	-1.1509	5.03385	-13.1639	3.31784e-07	6.02193e-06	7.16035
ENSMUSG00000025492	Ifitm3	66141	interferon induced transmembrane protein 3	2.33616	3.59463	13.1652	3.31495e-07	6.02193e-06	7.36025
ENSMUSG00000020926	Adam11	11488	a disintegrin and metallopeptidase domain 11	-1.76608	4.21569	-13.16	3.32645e-07	6.03042e-06	7.29225
ENSMUSG00000005125	Ndrg1	17988	N-myc downstream regulated gene 1	5.04203	2.24833	13.1399	3.37069e-07	6.10341e-06	7.23437
ENSMUSG00000020451	Limk2	16886	LIM motif-containing protein kinase 2	-0.856286	7.20068	-13.1341	3.38353e-07	6.11225e-06	6.8203
ENSMUSG00000032577	Mapkapk3	102626	mitogen-activated protein kinase-activated protein kinase 3	2.12536	5.24701	13.1355	3.38039e-07	6.11225e-06	7.13705
ENSMUSG00000032076	Cadm1	54725	cell adhesion molecule 1	0.643755	8.54294	13.1298	3.39297e-07	6.11642e-06	6.66789
ENSMUSG00000004266	Ptpn6	15170	protein tyrosine phosphatase, non-receptor type 6	1.33899	4.78046	13.1295	3.39381e-07	6.11642e-06	7.17607
ENSMUSG00000021986	Amer2	72125	APC membrane recruitment 2	-2.0976	3.19895	-13.124	3.40595e-07	6.13111e-06	7.35348
ENSMUSG00000024891	Slc29a2	13340	solute carrier family 29 (nucleoside transporters), member 2	-1.77442	3.4262	-13.1128	3.43132e-07	6.16233e-06	7.33083
ENSMUSG00000038648	Creb3l2	208647	cAMP responsive element binding protein 3-like 2	1.45321	5.97164	13.1142	3.42803e-07	6.16233e-06	6.9782
ENSMUSG00000024924	Vldlr	22359	very low density lipoprotein receptor	2.94345	2.98624	13.1079	3.44235e-07	6.17491e-06	7.35101
ENSMUSG00000031647	Mfap3l	71306	microfibrillar-associated protein 3-like	1.87406	5.76399	13.1048	3.44937e-07	6.18029e-06	7.02203
ENSMUSG00000040820	Hlcs	110948	holocarboxylase synthetase (biotin- [propriony-Coenzyme A-carboxylase (ATP-hydrolysing)] ligase)	-1.37509	4.87153	-13.1027	3.45415e-07	6.18164e-06	7.1509
ENSMUSG00000052684	Jun	16476	jun proto-oncogene	-1.5956	7.41163	-13.0998	3.46074e-07	6.18623e-06	6.78236
ENSMUSG00000036422	Pcdh8	18530	protocadherin 8	-6.6278	1.05587	-13.0956	3.47033e-07	6.19539e-06	6.55972
ENSMUSG00000032434	Cmtm6	67213	CKLF-like MARVEL transmembrane domain containing 6	0.712668	7.13439	13.0905	3.48201e-07	6.19539e-06	6.79359
ENSMUSG00000027742	Cog6	67542	component of oligomeric golgi complex 6	0.774199	6.68726	13.0913	3.48008e-07	6.19539e-06	6.84725
ENSMUSG00000044786	Zfp36	22695	zinc finger protein 36	2.21563	4.56447	13.0924	3.47764e-07	6.19539e-06	7.20998
ENSMUSG00000048915	Efna5	13640	ephrin A5	-1.64207	3.78439	-13.086	3.49226e-07	6.20191e-06	7.28369
ENSMUSG00000021238	Aldh6a1	104776	aldehyde dehydrogenase family 6, subfamily A1	1.29231	5.94374	13.0854	3.49375e-07	6.20191e-06	6.95695
ENSMUSG00000033257	Ttll4	67534	tubulin tyrosine ligase-like family, member 4	-1.10504	7.19245	-13.075	3.51785e-07	6.23597e-06	6.78197
ENSMUSG00000044197	Gpr146	80290	G protein-coupled receptor 146	2.50239	2.53882	13.0736	3.52106e-07	6.23597e-06	7.32368
ENSMUSG00000042607	Asb4	65255	ankyrin repeat and SOCS box-containing 4	-5.75693	0.875496	-13.0597	3.5535e-07	6.27894e-06	6.63265
ENSMUSG00000024177	Nme4	56520	NME/NM23 nucleoside diphosphate kinase 4	-1.09809	6.14374	-13.0613	3.5497e-07	6.27894e-06	6.90948
ENSMUSG00000033502	Cdc14a	229776	CDC14 cell division cycle 14A	-1.19289	4.78679	-13.0577	3.55823e-07	6.28008e-06	7.12651
ENSMUSG00000028909	Ptpru	19273	protein tyrosine phosphatase, receptor type, U	-1.20899	4.77708	-13.0492	3.5783e-07	6.30825e-06	7.12247
ENSMUSG00000044700	Tmem201	230917	transmembrane protein 201	-0.861328	6.7259	-13.0407	3.59847e-07	6.33653e-06	6.80971
ENSMUSG00000034926	Dhcr24	74754	24-dehydrocholesterol reductase	-2.14443	5.73283	-13.0293	3.62578e-07	6.37731e-06	6.99588
ENSMUSG00000024873	Cnih2	12794	cornichon family AMPA receptor auxiliary protein 2	-3.10008	2.2562	-13.0245	3.63723e-07	6.39013e-06	7.25864
ENSMUSG00000026888	Grb14	50915	growth factor receptor bound protein 14	1.09237	5.87942	13.0117	3.66828e-07	6.43731e-06	6.90778
ENSMUSG00000028613	Lrp8	16975	low density lipoprotein receptor-related protein 8, apolipoprotein e receptor	-3.34098	2.36524	-12.9983	3.70113e-07	6.48754e-06	7.24458
ENSMUSG00000031970	Dbndd1	72185	dysbindin (dystrobrevin binding protein 1) domain containing 1	-2.07745	2.69369	-12.991	3.71901e-07	6.51145e-06	7.27433
ENSMUSG00000046709	Mapk10	26414	mitogen-activated protein kinase 10	-6.25413	-0.573333	-12.9889	3.72432e-07	6.51331e-06	5.73764
ENSMUSG00000049107	Ntf3	18205	neurotrophin 3	-4.1646	1.3958	-12.986	3.73143e-07	6.51833e-06	7.01038
ENSMUSG00000017978	Cadps2	320405	Ca2+-dependent activator protein for secretion 2	2.35691	4.58791	12.9824	3.74042e-07	6.5266e-06	7.13511
ENSMUSG00000027583	Zbtb46	72147	zinc finger and BTB domain containing 46	-1.50644	4.81758	-12.9736	3.76219e-07	6.54516e-06	7.07263
ENSMUSG00000024072	Yipf4	67864	Yip1 domain family, member 4	0.886267	5.85562	12.9735	3.76246e-07	6.54516e-06	6.87871
ENSMUSG00000033083	Tbc1d4	210789	TBC1 domain family, member 4	1.73965	4.20892	12.973	3.76384e-07	6.54516e-06	7.1579
ENSMUSG00000009035	Tmem184b	223693	transmembrane protein 184b	-0.772888	6.66025	-12.9673	3.77808e-07	6.56249e-06	6.76378
ENSMUSG00000001768	Rin2	74030	Ras and Rab interactor 2	1.39272	5.48766	12.963	3.78889e-07	6.57382e-06	6.94534
ENSMUSG00000057092	Fxyd3	17178	FXYD domain-containing ion transport regulator 3	3.54733	2.19538	12.9579	3.80175e-07	6.58871e-06	7.201
ENSMUSG00000028159	Dapp1	26377	dual adaptor for phosphotyrosine and 3-phosphoinositides 1	1.72759	3.70736	12.9503	3.82101e-07	6.61462e-06	7.19576
ENSMUSG00000022849	Hspbap1	66667	Hspb associated protein 1	-1.32344	4.98375	-12.947	3.82939e-07	6.6195e-06	7.02111
ENSMUSG00000005225	Plekha8	231999	pleckstrin homology domain containing, family A (phosphoinositide binding specific) member 8	-1.18645	5.94537	-12.9458	3.83246e-07	6.6195e-06	6.85993
ENSMUSG00000074671	Tspyl3	241732	TSPY-like 3	-1.70599	3.26733	-12.9349	3.86035e-07	6.63781e-06	7.21952
ENSMUSG00000046434	Hnrnpa1	15382	heterogeneous nuclear ribonucleoprotein A1	-0.643578	9.7732	-12.9364	3.85662e-07	6.63781e-06	6.389
ENSMUSG00000032667	Pon2	330260	paraoxonase 2	1.44006	5.67971	12.9369	3.85534e-07	6.63781e-06	6.89766
ENSMUSG00000004655	Aqp1	11826	aquaporin 1	6.46537	0.801609	12.9399	3.84772e-07	6.63781e-06	6.43856
ENSMUSG00000025791	Pgm2	72157	phosphoglucomutase 2	1.53236	6.8123	12.9305	3.8719e-07	6.65022e-06	6.7276
ENSMUSG00000064215	Ifi27	52668	interferon, alpha-inducible protein 27	5.05099	-0.42729	12.9208	3.89682e-07	6.68555e-06	6.10235
ENSMUSG00000061013	Mkx	210719	mohawk homeobox	-4.28317	0.337823	-12.9108	3.9231e-07	6.72313e-06	6.58232
ENSMUSG00000052397	Ezr	22350	ezrin	0.775431	8.71576	12.907	3.933e-07	6.73258e-06	6.48791
ENSMUSG00000006777	Krt23	94179	keratin 23	4.13871	2.65595	12.8995	3.95267e-07	6.75871e-06	7.18968
ENSMUSG00000055491	Pprc1	226169	peroxisome proliferative activated receptor, gamma, coactivator-related 1	-1.01573	7.09305	-12.878	4.00999e-07	6.84148e-06	6.64975
ENSMUSG00000029622	Arpc1b	11867	actin related protein 2/3 complex, subunit 1B	1.04056	5.94055	12.8791	4.00715e-07	6.84148e-06	6.80155
ENSMUSG00000032289	Thsd4	207596	thrombospondin, type I, domain containing 4	-2.10696	4.4353	-12.871	4.02882e-07	6.86235e-06	7.07508
ENSMUSG00000028923	Necap2	66147	NECAP endocytosis associated 2	0.818231	6.83852	12.8702	4.03116e-07	6.86235e-06	6.6697
ENSMUSG00000076431	Sox4	20677	SRY (sex determining region Y)-box 4	-1.05411	7.59876	-12.8571	4.06653e-07	6.9149e-06	6.57751
ENSMUSG00000020140	Lgr5	14160	leucine rich repeat containing G protein coupled receptor 5	-1.76018	3.51256	-12.8539	4.07537e-07	6.91874e-06	7.14865
ENSMUSG00000030878	Cdr2	12585	cerebellar degeneration-related 2	-1.55575	3.74937	-12.853	4.0778e-07	6.91874e-06	7.12494
ENSMUSG00000025212	Sfxn3	94280	sideroflexin 3	1.25192	4.47319	12.8459	4.09713e-07	6.94387e-06	7.02131
ENSMUSG00000039419	Cntnap2	66797	contactin associated protein-like 2	-3.92295	0.988555	-12.8271	4.14939e-07	7.01517e-06	6.82859
ENSMUSG00000027397	Slc20a1	20515	solute carrier family 20, member 1	-0.915877	5.70033	-12.8258	4.15291e-07	7.01517e-06	6.80327
ENSMUSG00000033557	Fam20b	215015	family with sequence similarity 20, member B	0.769671	7.13086	12.8284	4.14576e-07	7.01517e-06	6.6045
ENSMUSG00000058571	Gpc6	23888	glypican 6	-0.913641	5.96704	-12.8232	4.1601e-07	7.0196e-06	6.75915
ENSMUSG00000039748	Exo1	26909	exonuclease 1	-0.825073	6.84272	-12.8117	4.19257e-07	7.06663e-06	6.62867
ENSMUSG00000087684	1200007C13Rik	NA	RIKEN cDNA 1200007C13 gene	6.23608	-2.84259	12.8067	4.20651e-07	7.08234e-06	5.44069
ENSMUSG00000003934	Efnb3	13643	ephrin B3	-2.57247	2.74816	-12.8045	4.2127e-07	7.085e-06	7.15098
ENSMUSG00000024727	Trpm6	225997	transient receptor potential cation channel, subfamily M, member 6	3.55073	2.63853	12.7927	4.24645e-07	7.13394e-06	7.13305
ENSMUSG00000108950	9130015G15Rik	NA	RIKEN cDNA 9130015G15 gene	4.55476	1.27413	12.787	4.26258e-07	7.15321e-06	6.84306
ENSMUSG00000074121	Ntf5	78405	neurotrophin 5	1.86062	2.94041	12.7816	4.27814e-07	7.17148e-06	7.1301
ENSMUSG00000028542	Slc6a9	14664	solute carrier family 6 (neurotransmitter transporter, glycine), member 9	-1.54103	3.45087	-12.7696	4.31315e-07	7.21442e-06	7.09236
ENSMUSG00000048373	Fgfbp1	14181	fibroblast growth factor binding protein 1	1.4058	4.73708	12.7705	4.31026e-07	7.21442e-06	6.93061
ENSMUSG00000035239	Neu3	50877	neuraminidase 3	1.64268	3.17427	12.7664	4.32221e-07	7.22171e-06	7.10748
ENSMUSG00000027217	Tspan18	241556	tetraspanin 18	-3.50555	2.00625	-12.7626	4.33353e-07	7.23094e-06	7.04961
ENSMUSG00000046314	Stxbp6	217517	syntaxin binding protein 6 (amisyn)	-1.53494	4.51233	-12.7613	4.33715e-07	7.23094e-06	6.96876
ENSMUSG00000024810	Il33	77125	interleukin 33	7.71112	1.12444	12.7554	4.35459e-07	7.25214e-06	6.24165
ENSMUSG00000003153	Slc2a3	20527	solute carrier family 2 (facilitated glucose transporter), member 3	-4.40903	4.90819	-12.751	4.36748e-07	7.26572e-06	7.03137
ENSMUSG00000036918	Ttc7	225049	tetratricopeptide repeat domain 7	1.77363	4.01415	12.7452	4.38477e-07	7.2866e-06	7.0224
ENSMUSG00000033278	Ptprm	19274	protein tyrosine phosphatase, receptor type, M	1.56216	6.98903	12.7229	4.45138e-07	7.3893e-06	6.55407
ENSMUSG00000026094	Stk17b	98267	serine/threonine kinase 17b (apoptosis-inducing)	1.31542	4.59553	12.7168	4.46981e-07	7.41187e-06	6.91201
ENSMUSG00000019762	Iyd	70337	iodotyrosine deiodinase	3.34336	0.965763	12.7104	4.48895e-07	7.43559e-06	6.8316
ENSMUSG00000015745	Plekho1	67220	pleckstrin homology domain containing, family O member 1	-4.33668	1.17852	-12.7016	4.51606e-07	7.47242e-06	6.76927
ENSMUSG00000036377	C530008M17Rik	320827	RIKEN cDNA C530008M17 gene	-1.55039	3.86306	-12.698	4.52691e-07	7.47859e-06	7.00514
ENSMUSG00000024270	Slc39a6	106957	solute carrier family 39 (metal ion transporter), member 6	-0.972601	5.94155	-12.6972	4.52953e-07	7.47859e-06	6.67291
ENSMUSG00000017314	Mpp2	50997	membrane protein, palmitoylated 2 (MAGUK p55 subfamily member 2)	-1.68995	4.16711	-12.6878	4.55832e-07	7.51804e-06	6.9666
ENSMUSG00000079316	Rab9	56382	RAB9, member RAS oncogene family	1.26992	5.8508	12.6755	4.59656e-07	7.57299e-06	6.67432
ENSMUSG00000006378	Gcat	14429	glycine C-acetyltransferase (2-amino-3-ketobutyrate-coenzyme A ligase)	-0.983367	6.70674	-12.6686	4.61806e-07	7.59817e-06	6.54301
ENSMUSG00000001555	Fkbp10	14230	FK506 binding protein 10	0.837413	6.54845	12.6675	4.62174e-07	7.59817e-06	6.55728
ENSMUSG00000035357	Pdzrn3	55983	PDZ domain containing RING finger 3	-3.48681	2.6562	-12.6628	4.63655e-07	7.60192e-06	7.04682
ENSMUSG00000022610	Mapk12	29857	mitogen-activated protein kinase 12	-2.26531	4.10621	-12.662	4.63888e-07	7.60192e-06	6.97061
ENSMUSG00000063296	Tmem117	320709	transmembrane protein 117	3.77399	1.48209	12.6634	4.63456e-07	7.60192e-06	6.89442
ENSMUSG00000030087	Klf15	66277	Kruppel-like factor 15	2.44033	2.7527	12.659	4.64832e-07	7.60927e-06	7.05372
ENSMUSG00000022957	Itsn1	16443	intersectin 1 (SH3 domain protein 1A)	-0.99927	6.10996	-12.6531	4.667e-07	7.63171e-06	6.61573
ENSMUSG00000023827	Agpat4	68262	1-acylglycerol-3-phosphate O-acyltransferase 4 (lysophosphatidic acid acyltransferase, delta)	-1.22669	5.13608	-12.6427	4.70032e-07	7.67803e-06	6.77419
ENSMUSG00000079259	Trim71	636931	tripartite motif-containing 71	-1.85217	3.50351	-12.6384	4.71389e-07	7.6819e-06	7.00152
ENSMUSG00000039328	Rnf122	68867	ring finger protein 122	-1.00284	6.03169	-12.6375	4.71685e-07	7.6819e-06	6.6161
ENSMUSG00000020644	Id2	15902	inhibitor of DNA binding 2	1.07434	8.7557	12.6373	4.7177e-07	7.6819e-06	6.2858
ENSMUSG00000022032	Scara5	71145	scavenger receptor class A, member 5	2.38933	2.46577	12.6287	4.74514e-07	7.7184e-06	7.0313
ENSMUSG00000042082	Arsb	11881	arylsulfatase B	1.28872	4.47907	12.621	4.77019e-07	7.75093e-06	6.86017
ENSMUSG00000019139	Isyna1	71780	myo-inositol 1-phosphate synthase A1	-0.899412	7.54222	-12.6157	4.7875e-07	7.77083e-06	6.40414
ENSMUSG00000002688	Prkd1	18760	protein kinase D1	-1.45191	5.47988	-12.6114	4.80149e-07	7.77466e-06	6.70298
ENSMUSG00000055745	Ldoc1l	223732	leucine zipper, down-regulated in cancer 1-like	-1.07383	6.09124	-12.6095	4.8077e-07	7.77466e-06	6.58861
ENSMUSG00000034648	Lrrn1	16979	leucine rich repeat protein 1, neuronal	2.45001	5.19809	12.6088	4.81011e-07	7.77466e-06	6.78395
ENSMUSG00000038291	Snx25	102141	sorting nexin 25	2.72597	3.08265	12.6098	4.80698e-07	7.77466e-06	7.01474
ENSMUSG00000004961	Syt5	53420	synaptotagmin V	-2.51782	3.75881	-12.6052	4.82182e-07	7.78539e-06	6.9705
ENSMUSG00000022280	Rnf19a	30945	ring finger protein 19A	0.911959	6.79092	12.6029	4.82963e-07	7.78981e-06	6.47991
ENSMUSG00000034109	Golim4	73124	golgi integral membrane protein 4	-1.12947	6.81841	-12.5822	4.89825e-07	7.89219e-06	6.46741
ENSMUSG00000030873	Scnn1b	20277	sodium channel, nonvoltage-gated 1 beta	2.43612	2.68227	12.577	4.91582e-07	7.91221e-06	6.99861
ENSMUSG00000001366	Fbxo9	71538	f-box protein 9	0.870784	5.60718	12.5744	4.92456e-07	7.91797e-06	6.62783
ENSMUSG00000017639	Rab11fip4	268451	RAB11 family interacting protein 4 (class II)	-1.8775	4.54515	-12.572	4.93261e-07	7.92262e-06	6.84007
ENSMUSG00000071001	Hrct1	100039781	histidine rich carboxyl terminus 1	5.20982	-0.70497	12.5687	4.94389e-07	7.93244e-06	5.75016
ENSMUSG00000031075	Ano1	101772	anoctamin 1, calcium activated chloride channel	1.38392	8.14391	12.5608	4.97044e-07	7.96671e-06	6.29844
ENSMUSG00000053801	Grwd1	101612	glutamate-rich WD repeat containing 1	-0.894868	6.98664	-12.5548	4.99097e-07	7.99122e-06	6.42257
ENSMUSG00000024691	Fam111a	107373	family with sequence similarity 111, member A	0.876829	6.06025	12.5533	4.99614e-07	7.99122e-06	6.54097
ENSMUSG00000034006	Pqlc1	66943	PQ loop repeat containing 1	1.77981	6.56622	12.5508	5.0047e-07	7.99658e-06	6.49044
ENSMUSG00000024533	Spire1	68166	spire homolog 1 (Drosophila)	-2.14765	3.63567	-12.5421	5.03452e-07	8.03587e-06	6.9284
ENSMUSG00000021054	Sgpp1	81535	sphingosine-1-phosphate phosphatase 1	0.962658	5.79773	12.5397	5.04297e-07	8.041e-06	6.57328
ENSMUSG00000019900	Rfx6	320995	regulatory factor X, 6	-7.64709	1.15365	-12.523	5.10103e-07	8.04899e-06	6.11588
ENSMUSG00000000149	Gna12	14673	guanine nucleotide binding protein, alpha 12	-1.33456	5.4318	-12.5298	5.07742e-07	8.04899e-06	6.64632
ENSMUSG00000040918	Slc19a2	116914	solute carrier family 19 (thiamine transporter), member 2	-1.20901	4.88713	-12.5322	5.06879e-07	8.04899e-06	6.73434
ENSMUSG00000032185	Carm1	59035	coactivator-associated arginine methyltransferase 1	-1.15495	7.36473	-12.5208	5.10869e-07	8.04899e-06	6.35664
ENSMUSG00000028040	Efna4	13639	ephrin A4	-0.896908	5.51249	-12.5249	5.09442e-07	8.04899e-06	6.61339
ENSMUSG00000032178	Ilf3	16201	interleukin enhancer binding factor 3	-0.689454	8.07129	-12.5323	5.06871e-07	8.04899e-06	6.28128
ENSMUSG00000016256	Ctsz	64138	cathepsin Z	0.801146	7.54616	12.5221	5.1042e-07	8.04899e-06	6.33104
ENSMUSG00000020246	Hcfc2	67933	host cell factor C2	0.886624	5.49274	12.5303	5.07562e-07	8.04899e-06	6.61486
ENSMUSG00000057440	Mpp7	75739	membrane protein, palmitoylated 7 (MAGUK p55 subfamily member 7)	1.02182	5.96919	12.5331	5.06587e-07	8.04899e-06	6.54298
ENSMUSG00000031278	Acsl4	50790	acyl-CoA synthetase long-chain family member 4	1.04958	6.45075	12.5277	5.08469e-07	8.04899e-06	6.47003
ENSMUSG00000028709	Mob3c	100465	MOB kinase activator 3C	1.58087	3.44727	12.5187	5.11613e-07	8.04899e-06	6.91517
ENSMUSG00000052085	Dock8	76088	dedicator of cytokinesis 8	2.25404	2.6581	12.5198	5.11231e-07	8.04899e-06	6.95971
ENSMUSG00000023336	Wfdc1	67866	WAP four-disulfide core domain 1	5.13928	-0.0647733	12.521	5.10801e-07	8.04899e-06	6.09211
ENSMUSG00000029070	Mxra8	74761	matrix-remodelling associated 8	-2.11775	2.65735	-12.5035	5.16968e-07	8.11831e-06	6.94872
ENSMUSG00000026029	Casp8	12370	caspase 8	0.848332	6.36563	12.5032	5.17076e-07	8.11831e-06	6.45989
ENSMUSG00000032101	Ddx25	30959	DEAD (Asp-Glu-Ala-Asp) box polypeptide 25	-2.71371	1.82112	-12.4877	5.22619e-07	8.19656e-06	6.88444
ENSMUSG00000029673	Auts2	NA	autism susceptibility candidate 2	-2.25337	2.08945	-12.486	5.23254e-07	8.19656e-06	6.91946
ENSMUSG00000039063	Echdc3	67856	enoyl Coenzyme A hydratase domain containing 3	2.32815	3.26802	12.4848	5.23662e-07	8.19656e-06	6.91448
ENSMUSG00000019235	Rps6kl1	238323	ribosomal protein S6 kinase-like 1	-2.30607	2.57933	-12.4818	5.24766e-07	8.20548e-06	6.93381
ENSMUSG00000070056	Mfhas1	52065	malignant fibrous histiocytoma amplified sequence 1	-1.10261	4.97686	-12.4796	5.2557e-07	8.2097e-06	6.67707
ENSMUSG00000025427	Rnf165	225743	ring finger protein 165	-5.9265	-0.73038	-12.4705	5.28861e-07	8.24503e-06	5.52117
ENSMUSG00000056698	Elmod3	232089	ELMO/CED-12 domain containing 3	1.42724	4.44353	12.4704	5.28906e-07	8.24503e-06	6.76017
ENSMUSG00000024165	Hn1l	52009	hematological and neurological expressed 1-like	-0.603067	9.26678	-12.461	5.32348e-07	8.29027e-06	6.09451
ENSMUSG00000039787	Cercam	99151	cerebral endothelial cell adhesion molecule	-1.06669	4.7088	-12.4484	5.3697e-07	8.35377e-06	6.69782
ENSMUSG00000019843	Fyn	14360	Fyn proto-oncogene	-1.16007	5.41082	-12.4339	5.42367e-07	8.4292e-06	6.57181
ENSMUSG00000030834	Abcc6	27421	ATP-binding cassette, sub-family C (CFTR/MRP), member 6	-3.77706	2.55411	-12.4291	5.44195e-07	8.432e-06	6.88076
ENSMUSG00000039236	Isg20	57444	interferon-stimulated protein	5.26086	0.971278	12.4303	5.43752e-07	8.432e-06	6.46343
ENSMUSG00000035805	Mlc1	170790	megalencephalic leukoencephalopathy with subcortical cysts 1 homolog (human)	7.9822	-1.97516	12.4311	5.43452e-07	8.432e-06	5.46736
ENSMUSG00000041423	Paqr6	68957	progestin and adipoQ receptor family member VI	2.46084	1.88767	12.4271	5.44938e-07	8.435e-06	6.86516
ENSMUSG00000052459	Atp6v1a	11964	ATPase, H+ transporting, lysosomal V1 subunit A	0.664701	7.23195	12.4227	5.46612e-07	8.44388e-06	6.29104
ENSMUSG00000072946	Ptgr2	77219	prostaglandin reductase 2	0.961481	5.83278	12.423	5.46492e-07	8.44388e-06	6.48095
ENSMUSG00000038855	Itpkb	320404	inositol 1,4,5-trisphosphate 3-kinase B	1.83164	3.97224	12.4194	5.47861e-07	8.45468e-06	6.79552
ENSMUSG00000028277	Ube2j1	56228	ubiquitin-conjugating enzyme E2J 1	0.765127	6.30455	12.4144	5.49762e-07	8.47549e-06	6.40039
ENSMUSG00000027016	Zfp385b	241494	zinc finger protein 385B	1.80411	3.38415	12.3984	5.55886e-07	8.56132e-06	6.83786
ENSMUSG00000026918	Brd3	67382	bromodomain containing 3	-0.720471	7.71306	-12.3948	5.57244e-07	8.57363e-06	6.21767
ENSMUSG00000040640	Erc2	238988	ELKS/RAB6-interacting/CAST family member 2	-2.05879	2.8476	-12.3882	5.59801e-07	8.60434e-06	6.8658
ENSMUSG00000029687	Ezh2	14056	enhancer of zeste 2 polycomb repressive complex 2 subunit	-0.656012	7.46865	-12.3856	5.60841e-07	8.60469e-06	6.2375
ENSMUSG00000030800	Prss8	76560	protease, serine 8 (prostasin)	0.656592	7.53158	12.3853	5.60944e-07	8.60469e-06	6.22866
ENSMUSG00000022906	Parp9	80285	poly (ADP-ribose) polymerase family, member 9	1.5697	3.5524	12.3805	5.62817e-07	8.62481e-06	6.80736
ENSMUSG00000027763	Mbnl1	56758	muscleblind-like 1 (Drosophila)	1.31092	7.87337	12.3735	5.65537e-07	8.65351e-06	6.18725
ENSMUSG00000032194	Kank2	235041	KN motif and ankyrin repeat domains 2	1.8475	4.78946	12.3728	5.65817e-07	8.65351e-06	6.6477
ENSMUSG00000021028	Mbip	217588	MAP3K12 binding inhibitory protein 1	0.601419	8.45809	12.3636	5.69464e-07	8.70062e-06	6.11086
ENSMUSG00000071226	Cecr2	330409	CECR2, histone acetyl-lysine reader	-1.16206	5.46237	-12.3578	5.71739e-07	8.72608e-06	6.50665
ENSMUSG00000036594	H2-Aa	14960	histocompatibility 2, class II antigen A, alpha	6.44209	-2.74349	12.3565	5.72267e-07	8.72608e-06	5.29652
ENSMUSG00000038732	Mboat1	218121	membrane bound O-acyltransferase domain containing 1	1.0906	5.72409	12.3532	5.73566e-07	8.73721e-06	6.45
ENSMUSG00000033318	Gstt2	14872	glutathione S-transferase, theta 2	1.82051	5.30371	12.3515	5.74254e-07	8.73902e-06	6.54748
ENSMUSG00000023886	Smoc2	64074	SPARC related modular calcium binding 2	-1.54367	7.87207	-12.3453	5.76752e-07	8.76564e-06	6.17169
ENSMUSG00000032366	Tpm1	22003	tropomyosin 1, alpha	0.772247	8.6762	12.3443	5.77145e-07	8.76564e-06	6.07273
ENSMUSG00000049295	Zfp219	69890	zinc finger protein 219	-0.954679	6.33353	-12.3386	5.79449e-07	8.79193e-06	6.34732
ENSMUSG00000027186	Elf5	13711	E74-like factor 5	3.59162	4.17231	12.3358	5.80544e-07	8.79986e-06	6.76543
ENSMUSG00000021253	Tgfb3	21809	transforming growth factor, beta 3	0.805312	6.00068	12.3314	5.82329e-07	8.80763e-06	6.38248
ENSMUSG00000019823	Mical1	171580	microtubule associated monooxygenase, calponin and LIM domain containing 1	0.873366	7.385	12.3303	5.82778e-07	8.80763e-06	6.20526
ENSMUSG00000055866	Per2	18627	period circadian clock 2	1.28466	5.63647	12.3328	5.81786e-07	8.80763e-06	6.45508
ENSMUSG00000010047	Hyal2	15587	hyaluronoglucosaminidase 2	-0.830844	7.49757	-12.325	5.84957e-07	8.8232e-06	6.18996
ENSMUSG00000024421	Lama3	16774	laminin, alpha 3	1.31748	7.12592	12.3252	5.84867e-07	8.8232e-06	6.23624
ENSMUSG00000053898	Ech1	51798	enoyl coenzyme A hydratase 1, peroxisomal	1.04274	6.19737	12.3167	5.88325e-07	8.86529e-06	6.34772
ENSMUSG00000041658	Rragb	245670	Ras-related GTP binding B	-1.66804	4.41517	-12.3151	5.88991e-07	8.86663e-06	6.66315
ENSMUSG00000052698	Tln2	70549	talin 2	-1.34816	5.12295	-12.3114	5.90517e-07	8.88088e-06	6.53679
ENSMUSG00000036412	Arsi	545260	arylsulfatase i	-6.67204	-2.37504	-12.3099	5.91123e-07	8.88131e-06	5.34246
ENSMUSG00000032006	Pdgfd	71785	platelet-derived growth factor, D polypeptide	-3.58872	0.87911	-12.3069	5.92357e-07	8.88209e-06	6.53141
ENSMUSG00000030796	Tead2	21677	TEA domain family member 2	-1.01005	7.67614	-12.3056	5.9291e-07	8.88209e-06	6.157
ENSMUSG00000046449	C77370	245555	expressed sequence C77370	1.22318	6.02449	12.3065	5.9253e-07	8.88209e-06	6.37061
ENSMUSG00000078695	Cisd3	217149	CDGSH iron sulfur domain 3	2.57465	3.36721	12.3019	5.94422e-07	8.89605e-06	6.78202
ENSMUSG00000001025	S100a6	20200	S100 calcium binding protein A6 (calcyclin)	3.11366	2.98177	12.3005	5.95027e-07	8.89644e-06	6.80717
ENSMUSG00000049521	Cdc42ep1	104445	CDC42 effector protein (Rho GTPase binding) 1	-0.935629	6.78256	-12.2954	5.97136e-07	8.90718e-06	6.25325
ENSMUSG00000004270	Lpcat3	14792	lysophosphatidylcholine acyltransferase 3	0.868845	6.18492	12.2946	5.97486e-07	8.90718e-06	6.32892
ENSMUSG00000018217	Pmp22	18858	peripheral myelin protein 22	4.59336	3.51547	12.2951	5.97285e-07	8.90718e-06	6.80298
ENSMUSG00000037049	Smpd1	20597	sphingomyelin phosphodiesterase 1, acid lysosomal	0.825622	5.75212	12.2916	5.98734e-07	8.91714e-06	6.39188
ENSMUSG00000017929	B4galt5	56336	UDP-Gal:betaGlcNAc beta 1,4-galactosyltransferase, polypeptide 5	-1.89578	5.18354	-12.2878	6.00321e-07	8.92636e-06	6.53283
ENSMUSG00000032355	Mlip	69642	muscular LMNA-interacting protein	3.01906	0.849132	12.2873	6.00517e-07	8.92636e-06	6.57935
ENSMUSG00000027230	Creb3l1	26427	cAMP responsive element binding protein 3-like 1	5.30336	1.35307	12.2834	6.02152e-07	8.94201e-06	6.49202
ENSMUSG00000039989	Cbx4	12418	chromobox 4	1.3437	4.31483	12.2777	6.04579e-07	8.96939e-06	6.63576
ENSMUSG00000002908	Kcnn1	84036	potassium intermediate/small conductance calcium-activated channel, subfamily N, member 1	-3.42627	0.779861	-12.2751	6.05657e-07	8.97671e-06	6.50236
ENSMUSG00000022584	Ly6c2	100041546	lymphocyte antigen 6 complex, locus C2	5.55435	-1.17537	12.2736	6.06292e-07	8.97745e-06	5.37489
ENSMUSG00000015714	Cers2	76893	ceramide synthase 2	0.677417	8.1077	12.2663	6.09399e-07	9.01477e-06	6.07501
ENSMUSG00000028681	Ptch2	19207	patched 2	-3.76911	2.01947	-12.2642	6.10299e-07	9.01938e-06	6.72309
ENSMUSG00000070858	Gm1673	381633	predicted gene 1673	-1.5015	3.79375	-12.2611	6.11623e-07	9.03027e-06	6.69857
ENSMUSG00000041245	Wnk3	279561	WNK lysine deficient protein kinase 3	-2.18036	3.04615	-12.257	6.13393e-07	9.04769e-06	6.76694
ENSMUSG00000051154	Commd3	12238	COMM domain containing 3	0.899099	6.78539	12.2503	6.16279e-07	9.07283e-06	6.21545
ENSMUSG00000022514	Il1rap	16180	interleukin 1 receptor accessory protein	1.02409	5.23417	12.2505	6.1616e-07	9.07283e-06	6.45425
ENSMUSG00000060716	Plekhh1	211945	pleckstrin homology domain containing, family H (with MyTH4 domain) member 1	-0.944315	5.58869	-12.2363	6.22346e-07	9.15338e-06	6.38626
ENSMUSG00000066894	Vsig10	231668	V-set and immunoglobulin domain containing 10	1.43603	5.44725	12.2349	6.22953e-07	9.15354e-06	6.41891
ENSMUSG00000024530	Prelid3a	225655	PRELI domain containing 3A	-5.73665	-0.399377	-12.2304	6.24935e-07	9.17389e-06	5.61183
ENSMUSG00000063870	Chd4	107932	chromodomain helicase DNA binding protein 4	-0.831868	7.3879	-12.2278	6.26081e-07	9.18193e-06	6.12838
ENSMUSG00000041889	Shisa4	77552	shisa family member 4	-1.99356	4.04499	-12.2261	6.26811e-07	9.18385e-06	6.65558
ENSMUSG00000020467	Efemp1	216616	epidermal growth factor-containing fibulin-like extracellular matrix protein 1	3.7516	2.82841	12.2232	6.28081e-07	9.19369e-06	6.75572
ENSMUSG00000029436	Mmp17	23948	matrix metallopeptidase 17	-1.47626	3.48914	-12.2098	6.3402e-07	9.26376e-06	6.69167
ENSMUSG00000090841	Myl6	17904	myosin, light polypeptide 6, alkali, smooth muscle and non-muscle	0.632349	8.0617	12.2097	6.34074e-07	9.26376e-06	6.03646
ENSMUSG00000053141	Ptprt	19281	protein tyrosine phosphatase, receptor type, T	-1.35758	3.86438	-12.2067	6.35387e-07	9.27411e-06	6.64804
ENSMUSG00000034551	Hdx	245596	highly divergent homeobox	-2.31619	1.76267	-12.204	6.36595e-07	9.27683e-06	6.70536
ENSMUSG00000028906	Epb41	269587	erythrocyte membrane protein band 4.1	-0.983711	7.24826	-12.2031	6.37024e-07	9.27683e-06	6.12732
ENSMUSG00000028233	Tgs1	116940	trimethylguanosine synthase 1	-0.819933	6.51142	-12.2015	6.37707e-07	9.27683e-06	6.2155
ENSMUSG00000043924	Ncmap	230822	noncompact myelin associated protein	1.80138	3.61784	12.2009	6.3799e-07	9.27683e-06	6.67478
ENSMUSG00000026764	Kif5c	16574	kinesin family member 5C	-5.21828	1.52278	-12.1985	6.39081e-07	9.2839e-06	6.47375
ENSMUSG00000028849	Map7d1	245877	MAP7 domain containing 1	-0.994177	5.90201	-12.1936	6.41262e-07	9.30678e-06	6.30411
ENSMUSG00000025658	Cnksr2	245684	connector enhancer of kinase suppressor of Ras 2	-2.3721	3.93457	-12.19	6.42901e-07	9.31279e-06	6.65241
ENSMUSG00000027035	Cers6	241447	ceramide synthase 6	-1.31675	5.1638	-12.1881	6.43756e-07	9.31279e-06	6.43616
ENSMUSG00000032477	Cdc25a	12530	cell division cycle 25A	-0.673006	7.12727	-12.1874	6.44101e-07	9.31279e-06	6.12602
ENSMUSG00000024268	Celf4	108013	CUGBP, Elav-like family member 4	1.651	3.39351	12.1902	6.42833e-07	9.31279e-06	6.68555
ENSMUSG00000068877	Selenbp2	20342	selenium binding protein 2	4.21676	1.56106	12.185	6.45164e-07	9.31937e-06	6.58289
ENSMUSG00000036186	Fam69b	56279	family with sequence similarity 69, member B	-1.30137	4.64658	-12.1819	6.46568e-07	9.33088e-06	6.51711
ENSMUSG00000026587	Astn1	11899	astrotactin 1	-5.60965	0.0243546	-12.1794	6.4774e-07	9.33901e-06	5.83109
ENSMUSG00000030557	Mef2a	17258	myocyte enhancer factor 2A	0.90639	6.19138	12.1755	6.495e-07	9.3556e-06	6.23815
ENSMUSG00000022837	Iqcb1	320299	IQ calmodulin-binding motif containing 1	-0.762635	6.1804	-12.1684	6.52777e-07	9.39399e-06	6.23557
ENSMUSG00000028927	Padi2	18600	peptidyl arginine deiminase, type II	-2.78162	2.51042	-12.1631	6.5521e-07	9.41136e-06	6.71311
ENSMUSG00000055681	Cope	59042	coatomer protein complex, subunit epsilon	0.645291	7.70233	12.1632	6.55159e-07	9.41136e-06	6.04014
ENSMUSG00000031636	Pdlim3	53318	PDZ and LIM domain 3	2.91785	2.16177	12.158	6.57549e-07	9.43614e-06	6.69679
ENSMUSG00000034460	Six4	20474	sine oculis-related homeobox 4	-1.53605	5.03977	-12.1533	6.59732e-07	9.45863e-06	6.43965
ENSMUSG00000043668	Tox3	244579	TOX high mobility group box family member 3	-2.43716	3.005	-12.1418	6.65115e-07	9.50032e-06	6.69023
ENSMUSG00000038456	Dennd2a	209773	DENN/MADD domain containing 2A	-1.14944	6.02562	-12.1429	6.64616e-07	9.50032e-06	6.25062
ENSMUSG00000026568	Mpc2	70456	mitochondrial pyruvate carrier 2	1.01622	5.41	12.1431	6.64515e-07	9.50032e-06	6.34238
ENSMUSG00000046352	Gjb2	14619	gap junction protein, beta 2	7.28597	-1.68137	12.1424	6.64814e-07	9.50032e-06	5.34511
ENSMUSG00000039747	Orai2	269717	ORAI calcium release-activated calcium modulator 2	1.54951	3.92567	12.1403	6.65838e-07	9.50181e-06	6.59124
ENSMUSG00000008136	Fhl2	14200	four and a half LIM domains 2	-2.86365	1.54557	-12.1356	6.68052e-07	9.52455e-06	6.61615
ENSMUSG00000030513	Pcsk6	18553	proprotein convertase subtilisin/kexin type 6	1.92713	5.21277	12.1159	6.77374e-07	9.6485e-06	6.38921
ENSMUSG00000038967	Pdk2	18604	pyruvate dehydrogenase kinase, isoenzyme 2	1.50854	5.59924	12.1135	6.78532e-07	9.65174e-06	6.30422
ENSMUSG00000037405	Icam1	15894	intercellular adhesion molecule 1	1.61301	6.49886	12.1125	6.79022e-07	9.65174e-06	6.16317
ENSMUSG00000031750	Il34	76527	interleukin 34	3.15244	1.97627	12.1115	6.79487e-07	9.65174e-06	6.64737
ENSMUSG00000018102	Hist1h2bc	68024	histone cluster 1, H2bc	1.67582	4.38369	12.1079	6.81231e-07	9.66757e-06	6.5078
ENSMUSG00000024589	Nedd4l	83814	neural precursor cell expressed, developmentally down-regulated gene 4-like	1.88155	7.00661	12.0993	6.85409e-07	9.71787e-06	6.08971
ENSMUSG00000020160	Meis1	17268	Meis homeobox 1	-3.46561	1.92051	-12.0918	6.89038e-07	9.76031e-06	6.61058
ENSMUSG00000109305	1810010D01Rik	NA	RIKEN cDNA 1810010D01 gene	-5.58424	1.88057	-12.0803	6.94707e-07	9.82673e-06	6.45669
ENSMUSG00000005054	Cstb	13014	cystatin B	0.788226	6.5012	12.0797	6.95007e-07	9.82673e-06	6.11969
ENSMUSG00000000154	Slc22a18	18400	solute carrier family 22 (organic cation transporter), member 18	2.30659	1.73539	12.072	6.9881e-07	9.87142e-06	6.6202
ENSMUSG00000064037	Gpn1	74254	GPN-loop GTPase 1	-0.786491	7.36282	-12.0683	7.00604e-07	9.88766e-06	6.00814
ENSMUSG00000008475	Arpc5	67771	actin related protein 2/3 complex, subunit 5	0.621459	7.96436	12.0611	7.0421e-07	9.92942e-06	5.93237
ENSMUSG00000018974	Sart3	53890	squamous cell carcinoma antigen recognized by T cells 3	-0.674897	7.35359	-12.0593	7.05133e-07	9.93331e-06	6.00115
ENSMUSG00000057286	St6galnac2	20446	ST6 (alpha-N-acetyl-neuraminyl-2,3-beta-galactosyl-1,3)-N-acetylgalactosaminide alpha-2,6-sialyltransferase 2	1.60151	5.24966	12.0521	7.08726e-07	9.97479e-06	6.321
ENSMUSG00000074207	Adh1	11522	alcohol dehydrogenase 1 (class I)	4.08449	0.00623099	12.0507	7.09446e-07	9.97577e-06	6.06121
ENSMUSG00000010175	Prox1	19130	prospero homeobox 1	-3.47202	2.74469	-12.042	7.13834e-07	1.00124e-05	6.62927
ENSMUSG00000019986	Ahi1	52906	Abelson helper integration site 1	-1.5807	3.63087	-12.0414	7.14132e-07	1.00124e-05	6.55637
ENSMUSG00000005899	Smpd4	77626	sphingomyelin phosphodiesterase 4	-0.674123	7.06238	-12.0441	7.12766e-07	1.00124e-05	6.02334
ENSMUSG00000023046	Igfbp6	16012	insulin-like growth factor binding protein 6	5.30297	0.580892	12.0404	7.14658e-07	1.00124e-05	6.1054
ENSMUSG00000045639	Zfp629	320683	zinc finger protein 629	-0.842882	6.06433	-12.0386	7.15584e-07	1.00162e-05	6.15539
ENSMUSG00000039244	E130309D02Rik	231868	RIKEN cDNA E130309D02 gene	-0.845888	5.70387	-12.0257	7.22177e-07	1.00901e-05	6.20329
ENSMUSG00000024044	Epb41l3	13823	erythrocyte membrane protein band 4.1 like 3	-0.791898	7.80136	-12.0262	7.21932e-07	1.00901e-05	5.92577
ENSMUSG00000040543	Pitpnm3	327958	PITPNM family member 3	4.14998	2.59347	12.0237	7.23193e-07	1.00951e-05	6.60712
ENSMUSG00000035493	Tgfbi	21810	transforming growth factor, beta induced	2.26245	4.70867	12.01	7.30287e-07	1.01849e-05	6.40721
ENSMUSG00000032177	Pde4a	18577	phosphodiesterase 4A, cAMP specific	-1.20764	4.30188	-12.0007	7.35142e-07	1.02278e-05	6.43254
ENSMUSG00000020288	Ahsa2	268390	AHA1, activator of heat shock protein ATPase 2	-0.977274	5.80747	-12.0008	7.35077e-07	1.02278e-05	6.17103
ENSMUSG00000027425	Csrp2bp	228714	cysteine and glycine-rich protein 2 binding protein	-0.728416	6.51732	-12.0003	7.35359e-07	1.02278e-05	6.05829
ENSMUSG00000000131	Xpo6	74204	exportin 6	-0.755801	7.57061	-11.995	7.38151e-07	1.02573e-05	5.92723
ENSMUSG00000047617	BC029214	227622	cDNA sequence BC029214	1.60767	3.64673	11.9856	7.43124e-07	1.03171e-05	6.5102
ENSMUSG00000028161	Ppp3ca	19055	protein phosphatase 3, catalytic subunit, alpha isoform	0.868026	7.09372	11.9815	7.45291e-07	1.03378e-05	5.97089
ENSMUSG00000034586	Hid1	217310	HID1 domain containing	0.988635	5.42533	11.9797	7.46277e-07	1.03421e-05	6.21378
ENSMUSG00000006442	Srm	20810	spermidine synthase	-0.720985	7.04169	-11.9742	7.49216e-07	1.03735e-05	5.97188
ENSMUSG00000027827	Kcnab1	16497	potassium voltage-gated channel, shaker-related subfamily, beta member 1	-2.31211	2.29085	-11.9716	7.50608e-07	1.03834e-05	6.57833
ENSMUSG00000024799	Tm7sf2	73166	transmembrane 7 superfamily member 2	-1.27918	3.93681	-11.9582	7.5782e-07	1.04461e-05	6.45316
ENSMUSG00000095567	Noc2l	57741	NOC2 like nucleolar associated transcriptional repressor	-0.901151	7.5909	-11.9605	7.5656e-07	1.04461e-05	5.89952
ENSMUSG00000045827	Serpinb9	20723	serine (or cysteine) peptidase inhibitor, clade B, member 9	0.618177	7.3305	11.9584	7.57713e-07	1.04461e-05	5.92343
ENSMUSG00000036278	Macrod1	107227	MACRO domain containing 1	1.30713	4.13869	11.9581	7.57861e-07	1.04461e-05	6.42189
ENSMUSG00000044367	Slc16a13	69309	solute carrier family 16 (monocarboxylic acid transporters), member 13	-1.50818	3.72044	-11.9561	7.58945e-07	1.04517e-05	6.48182
ENSMUSG00000020075	Ddx21	56200	DEAD (Asp-Glu-Ala-Asp) box polypeptide 21	-0.83902	5.95491	-11.9524	7.60989e-07	1.0461e-05	6.10556
ENSMUSG00000052712	BC004004	80748	cDNA sequence BC004004	0.844984	5.94181	11.9527	7.608e-07	1.0461e-05	6.10293
ENSMUSG00000015937	H2afy	26914	H2A histone family, member Y	-0.554795	8.52997	-11.9483	7.63208e-07	1.04822e-05	5.78313
ENSMUSG00000022519	Srl	106393	sarcalumenin	-1.04899	5.32056	-11.9435	7.65838e-07	1.05059e-05	6.21229
ENSMUSG00000032278	Paqr5	74090	progestin and adipoQ receptor family member V	2.34294	2.78371	11.9414	7.6699e-07	1.05059e-05	6.55242
ENSMUSG00000009876	Cox4i2	84682	cytochrome c oxidase subunit IV isoform 2	5.4658	2.16656	11.9426	7.66345e-07	1.05059e-05	6.44986
ENSMUSG00000015214	Mtmr1	53332	myotubularin related protein 1	0.980641	5.35074	11.9341	7.70977e-07	1.05511e-05	6.19137
ENSMUSG00000043183	Simc1	319719	SUMO-interacting motifs containing 1	-1.24919	4.99134	-11.9301	7.73216e-07	1.05723e-05	6.26685
ENSMUSG00000025130	P4hb	18453	prolyl 4-hydroxylase, beta polypeptide	0.539925	9.82017	11.9268	7.75072e-07	1.05883e-05	5.6167
ENSMUSG00000032199	Polr2m	28015	polymerase (RNA) II (DNA directed) polypeptide M	-0.559103	8.81612	-11.9208	7.78387e-07	1.06241e-05	5.72968
ENSMUSG00000020218	Wif1	24117	Wnt inhibitory factor 1	5.59021	0.0855737	11.9167	7.80679e-07	1.06459e-05	5.7837
ENSMUSG00000028706	Nsun4	72181	NOL1/NOP2/Sun domain family, member 4	1.08679	5.40742	11.9098	7.84576e-07	1.06896e-05	6.16589
ENSMUSG00000005968	Tuft1	22156	tuftelin 1	1.02299	4.82327	11.9041	7.87766e-07	1.07235e-05	6.2627
ENSMUSG00000030272	Camk1	52163	calcium/calmodulin-dependent protein kinase I	0.849883	6.45221	11.9003	7.89911e-07	1.07432e-05	5.98807
ENSMUSG00000034035	Ccdc17	622665	coiled-coil domain containing 17	2.72953	1.68748	11.8793	8.01965e-07	1.08975e-05	6.47566
ENSMUSG00000021814	Anxa7	11750	annexin A7	1.10332	5.50941	11.8774	8.03066e-07	1.09028e-05	6.1234
ENSMUSG00000018593	Sparc	20692	secreted acidic cysteine rich glycoprotein	0.678142	9.46387	11.87	8.07319e-07	1.09509e-05	5.61471
ENSMUSG00000036461	Elf1	13709	E74-like factor 1	0.911918	6.27857	11.8675	8.08792e-07	1.09612e-05	5.98758
ENSMUSG00000037242	Clic4	29876	chloride intracellular channel 4 (mitochondrial)	-0.571873	8.29367	-11.862	8.11995e-07	1.09949e-05	5.74139
ENSMUSG00000025780	Itih5	209378	inter-alpha (globulin) inhibitor H5	-2.09326	2.34493	-11.8475	8.20536e-07	1.11007e-05	6.49241
ENSMUSG00000025500	Lmntd2	72000	lamin tail domain containing 2	-1.57091	3.15114	-11.8442	8.22479e-07	1.11172e-05	6.45354
ENSMUSG00000060950	Trmt61a	328162	tRNA methyltransferase 61A	-1.05246	4.93243	-11.8305	8.307e-07	1.12185e-05	6.19342
ENSMUSG00000032314	Etfa	110842	electron transferring flavoprotein, alpha polypeptide	0.683877	7.70698	11.8255	8.33685e-07	1.12489e-05	5.7768
ENSMUSG00000021947	Cryl1	68631	crystallin, lambda 1	1.86785	4.16909	11.8241	8.34536e-07	1.12505e-05	6.33043
ENSMUSG00000003279	Dlgap1	224997	discs, large (Drosophila) homolog-associated protein 1	-3.97209	0.656833	-11.8214	8.36168e-07	1.12626e-05	6.14561
ENSMUSG00000031216	Stard8	236920	START domain containing 8	1.29983	4.54325	11.8147	8.40219e-07	1.1298e-05	6.24947
ENSMUSG00000032202	Rab27a	11891	RAB27A, member RAS oncogene family	2.39901	3.29237	11.8146	8.40267e-07	1.1298e-05	6.43036
ENSMUSG00000026080	Chst10	98388	carbohydrate sulfotransferase 10	-2.55707	2.88701	-11.8085	8.43969e-07	1.13378e-05	6.45649
ENSMUSG00000029348	Asphd2	72898	aspartate beta-hydroxylase domain containing 2	-8.40229	0.00452236	-11.8059	8.45591e-07	1.13497e-05	5.28245
ENSMUSG00000053024	Cntn2	21367	contactin 2	-7.56423	-0.104895	-11.7952	8.52176e-07	1.14082e-05	5.26512
ENSMUSG00000031302	Nlgn3	245537	neuroligin 3	-2.41259	1.74141	-11.7962	8.51554e-07	1.14082e-05	6.42707
ENSMUSG00000007872	Id3	15903	inhibitor of DNA binding 3	0.892993	7.4128	11.7956	8.51937e-07	1.14082e-05	5.7882
ENSMUSG00000025938	Slco5a1	240726	solute carrier organic anion transporter family, member 5A1	-4.65248	1.20767	-11.7904	8.55133e-07	1.14373e-05	6.20911
ENSMUSG00000029992	Gfpt1	14583	glutamine fructose-6-phosphate transaminase 1	1.27456	6.5584	11.7893	8.5584e-07	1.14373e-05	5.89426
ENSMUSG00000000184	Ccnd2	12444	cyclin D2	-1.27711	8.65001	-11.7777	8.63046e-07	1.15235e-05	5.63935
ENSMUSG00000045730	Adrb2	11555	adrenergic receptor, beta 2	7.30432	-0.47651	11.7686	8.68745e-07	1.15896e-05	5.235
ENSMUSG00000056612	Ppp1r14b	18938	protein phosphatase 1, regulatory (inhibitor) subunit 14B	-0.846551	7.20826	-11.7663	8.70217e-07	1.15991e-05	5.79035
ENSMUSG00000028617	Lrrc42	77809	leucine rich repeat containing 42	-0.645648	7.14008	-11.762	8.72922e-07	1.16251e-05	5.79301
ENSMUSG00000040009	Gnaz	14687	guanine nucleotide binding protein, alpha z subunit	-1.61484	3.01568	-11.7587	8.75018e-07	1.16429e-05	6.40077
ENSMUSG00000032280	Tle3	21887	transducin-like enhancer of split 3	-1.29565	5.88221	-11.7521	8.79219e-07	1.16685e-05	5.97703
ENSMUSG00000000568	Hnrnpd	11991	heterogeneous nuclear ribonucleoprotein D	-0.621218	8.39453	-11.7529	8.78687e-07	1.16685e-05	5.6442
ENSMUSG00000006310	Zbtb32	58206	zinc finger and BTB domain containing 32	2.85657	1.70952	11.753	8.78664e-07	1.16685e-05	6.38866
ENSMUSG00000049382	Krt8	16691	keratin 8	0.562998	8.85504	11.7411	8.86311e-07	1.17524e-05	5.58252
ENSMUSG00000024614	Tmx3	67988	thioredoxin-related transmembrane protein 3	0.755114	6.39451	11.7357	8.89789e-07	1.17884e-05	5.86502
ENSMUSG00000057948	Unc13d	70450	unc-13 homolog D (C. elegans)	2.95399	3.3002	11.7344	8.90621e-07	1.17892e-05	6.38104
ENSMUSG00000033096	Apmap	71881	adipocyte plasma membrane associated protein	0.721869	6.28158	11.7269	8.95467e-07	1.18431e-05	5.87334
ENSMUSG00000020453	Patz1	56218	POZ (BTB) and AT hook containing zinc finger 1	-0.822901	6.94559	-11.7248	8.96848e-07	1.18512e-05	5.78868
ENSMUSG00000029206	Nsun7	70918	NOL1/NOP2/Sun domain family, member 7	3.91715	2.03881	11.7108	9.06043e-07	1.19624e-05	6.35868
ENSMUSG00000002015	Bcap31	27061	B cell receptor associated protein 31	0.726117	7.83595	11.706	9.09251e-07	1.19945e-05	5.66792
ENSMUSG00000067369	Trmt2b	215201	TRM2 tRNA methyltransferase 2B	1.34755	4.86293	11.7028	9.11373e-07	1.20121e-05	6.10918
ENSMUSG00000075410	Prcd	100038570	photoreceptor disc component	3.4755	0.334107	11.6996	9.1349e-07	1.20297e-05	6.04726
ENSMUSG00000022091	Sorbs3	20410	sorbin and SH3 domain containing 3	0.844165	5.74533	11.6973	9.15009e-07	1.20394e-05	5.93475
ENSMUSG00000027227	Sord	20322	sorbitol dehydrogenase	1.25659	4.43451	11.6916	9.18835e-07	1.20628e-05	6.17118
ENSMUSG00000019852	Arfgef3	215821	ARFGEF family member 3	2.13189	4.93274	11.6911	9.19143e-07	1.20628e-05	6.11916
ENSMUSG00000028838	Extl1	56219	exostoses (multiple)-like 1	2.51286	3.16121	11.6927	9.18108e-07	1.20628e-05	6.35153
ENSMUSG00000019467	Arhgef25	52666	Rho guanine nucleotide exchange factor (GEF) 25	-1.66705	3.31743	-11.687	9.21938e-07	1.20891e-05	6.3237
ENSMUSG00000025932	Eya1	14048	EYA transcriptional coactivator and phosphatase 1	-1.32199	5.10068	-11.6798	9.26805e-07	1.21426e-05	6.05613
ENSMUSG00000024785	Rcl1	59028	RNA terminal phosphate cyclase-like 1	-0.798525	6.05676	-11.6766	9.28971e-07	1.21606e-05	5.87228
ENSMUSG00000032854	Ugt8a	22239	UDP galactosyltransferase 8A	-1.24023	4.03469	-11.6673	9.35314e-07	1.22332e-05	6.21799
ENSMUSG00000044707	Ccnjl	380694	cyclin J-like	-0.873007	5.72742	-11.6651	9.36775e-07	1.22419e-05	5.91878
ENSMUSG00000018378	Cuedc1	103841	CUE domain containing 1	-1.62064	4.15298	-11.6608	9.39732e-07	1.227e-05	6.2056
ENSMUSG00000022371	Col14a1	12818	collagen, type XIV, alpha 1	3.06493	2.74881	11.6595	9.40637e-07	1.22714e-05	6.35492
ENSMUSG00000079445	B3gnt7	227327	UDP-GlcNAc:betaGal beta-1,3-N-acetylglucosaminyltransferase 7	-1.03688	5.12568	-11.6522	9.45666e-07	1.23161e-05	6.01947
ENSMUSG00000038366	Lasp1	16796	LIM and SH3 protein 1	0.904096	7.75447	11.6527	9.45365e-07	1.23161e-05	5.63576
ENSMUSG00000018167	Stard3	59045	START domain containing 3	1.0154	5.53052	11.6493	9.47709e-07	1.23323e-05	5.93842
ENSMUSG00000045215	Asxl3	211961	additional sex combs like 3 (Drosophila)	-2.86401	2.04254	-11.642	9.52774e-07	1.23877e-05	6.33137
ENSMUSG00000087365	C430049B03Rik	NA	RIKEN cDNA C430049B03 gene	1.62379	3.54084	11.633	9.59098e-07	1.24593e-05	6.25635
ENSMUSG00000050549	5730508B09Rik	70617	RIKEN cDNA 5730508B09 gene	1.48796	3.47771	11.63	9.6121e-07	1.2471e-05	6.25886
ENSMUSG00000028475	5430416O09Rik	71406	RIKEN cDNA 5430416O09 gene	3.989	1.28548	11.6294	9.61618e-07	1.2471e-05	6.19135
ENSMUSG00000071253	Slc25a16	73132	solute carrier family 25 (mitochondrial carrier, Graves disease autoantigen), member 16	1.17697	4.94297	11.6238	9.65611e-07	1.25122e-05	6.02773
ENSMUSG00000049001	Ndnf	68169	neuron-derived neurotrophic factor	2.7634	6.57056	11.6222	9.66732e-07	1.25162e-05	5.81744
ENSMUSG00000031712	Il15	16168	interleukin 15	-1.49534	4.5778	-11.6189	9.69058e-07	1.25357e-05	6.10481
ENSMUSG00000046879	Irgm1	15944	immunity-related GTPase family M member 1	2.73821	2.89144	11.6153	9.71637e-07	1.25585e-05	6.31431
ENSMUSG00000003541	Ier3	15937	immediate early response 3	1.96216	2.95603	11.609	9.76097e-07	1.26055e-05	6.29506
ENSMUSG00000060600	Eno3	13808	enolase 3, beta muscle	-1.37461	5.5936	-11.6035	9.8008e-07	1.26357e-05	5.91186
ENSMUSG00000009248	Ascl2	17173	achaete-scute family bHLH transcription factor 2	3.1079	1.24681	11.6045	9.79372e-07	1.26357e-05	6.22106
ENSMUSG00000022307	Oxr1	170719	oxidation resistance 1	0.91063	7.56325	11.6002	9.82467e-07	1.26559e-05	5.61552
ENSMUSG00000040329	Il7	16196	interleukin 7	3.22296	0.276367	11.5957	9.85749e-07	1.26875e-05	5.98988
ENSMUSG00000029528	Pxn	19303	paxillin	0.851916	6.2983	11.5945	9.86599e-07	1.26878e-05	5.76792
ENSMUSG00000074505	Fat3	270120	FAT atypical cadherin 3	-6.32855	-2.63844	-11.5916	9.88671e-07	1.27038e-05	4.99363
ENSMUSG00000026547	Tagln2	21346	transgelin 2	0.644648	7.9844	11.5842	9.9412e-07	1.27631e-05	5.55355
ENSMUSG00000039853	Trim14	74735	tripartite motif-containing 14	5.07417	-0.705067	11.5783	9.98449e-07	1.2808e-05	5.33186
ENSMUSG00000053441	Adamts19	240322	a disintegrin-like and metallopeptidase (reprolysin type) with thrombospondin type 1 motif, 19	-5.83188	1.78346	-11.5716	1.00337e-06	1.28603e-05	6.09733
ENSMUSG00000023755	Rhebl1	69159	Ras homolog enriched in brain like 1	-1.71868	3.12044	-11.5688	1.00542e-06	1.28682e-05	6.252
ENSMUSG00000022435	Upk3a	22270	uroplakin 3A	3.00844	3.13055	11.5685	1.00565e-06	1.28682e-05	6.27064
ENSMUSG00000017707	Serinc3	26943	serine incorporator 3	0.724549	7.19425	11.5644	1.00871e-06	1.28859e-05	5.62803
ENSMUSG00000029377	Ereg	13874	epiregulin	7.2417	-1.7119	11.5652	1.00808e-06	1.28859e-05	5.08785
ENSMUSG00000085323	9130410C08Rik	NA	RIKEN cDNA 9130410C08 gene	-6.32532	-2.79311	-11.5522	1.01782e-06	1.29553e-05	4.96134
ENSMUSG00000024921	Smarca2	67155	SWI/SNF related, matrix associated, actin dependent regulator of chromatin, subfamily a, member 2	0.986251	5.37343	11.5529	1.01727e-06	1.29553e-05	5.88906
ENSMUSG00000048078	Tenm4	23966	teneurin transmembrane protein 4	1.26874	5.04249	11.5515	1.01832e-06	1.29553e-05	5.95535
ENSMUSG00000020583	Matn3	17182	matrilin 3	1.91995	2.33787	11.5515	1.01837e-06	1.29553e-05	6.27825
ENSMUSG00000074785	Plxnc1	54712	plexin C1	2.91637	1.73328	11.5522	1.01781e-06	1.29553e-05	6.25006
ENSMUSG00000056370	Sftpb	20388	surfactant associated protein B	4.83137	1.44532	11.5477	1.02118e-06	1.29804e-05	6.11003
ENSMUSG00000038776	Ephx1	13849	epoxide hydrolase 1, microsomal	3.23428	1.46238	11.5464	1.02214e-06	1.29818e-05	6.20649
ENSMUSG00000020423	Btg2	12227	B cell translocation gene 2, anti-proliferative	0.97941	7.7983	11.5405	1.02663e-06	1.3028e-05	5.54136
ENSMUSG00000020929	Eftud2	20624	elongation factor Tu GTP binding domain containing 2	-0.570581	8.7283	-11.5292	1.03528e-06	1.3127e-05	5.42742
ENSMUSG00000041798	Gck	103988	glucokinase	-2.34159	2.71828	-11.5257	1.03793e-06	1.31388e-05	6.253
ENSMUSG00000033712	Ccar2	219158	cell cycle activator and apoptosis regulator 2	-0.676354	7.96304	-11.5261	1.03765e-06	1.31388e-05	5.51043
ENSMUSG00000032051	Fdx1	14148	ferredoxin 1	0.796268	5.56157	11.5156	1.04569e-06	1.32261e-05	5.82086
ENSMUSG00000095115	Itpripl2	319622	inositol 1,4,5-triphosphate receptor interacting protein-like 2	3.16864	2.36722	11.5107	1.04951e-06	1.32636e-05	6.24864
ENSMUSG00000025150	Cbr2	12409	carbonyl reductase 2	8.33962	1.07296	11.5093	1.05059e-06	1.32664e-05	5.46491
ENSMUSG00000034543	Morc2a	74522	microrchidia 2A	-0.694201	7.10096	-11.5074	1.05211e-06	1.32746e-05	5.59462
ENSMUSG00000010122	Slc47a1	67473	solute carrier family 47, member 1	-5.22928	-1.15853	-11.506	1.0532e-06	1.32774e-05	5.04226
ENSMUSG00000032109	Nlrx1	270151	NLR family member X1	2.10993	2.21981	11.502	1.05631e-06	1.33057e-05	6.24326
ENSMUSG00000025050	Pcgf6	71041	polycomb group ring finger 6	-0.727236	6.05535	-11.4993	1.05839e-06	1.33107e-05	5.72945
ENSMUSG00000023885	Thbs2	21826	thrombospondin 2	2.25053	3.37454	11.4993	1.05844e-06	1.33107e-05	6.18239
ENSMUSG00000022394	L3mbtl2	214669	l(3)mbt-like 2 (Drosophila)	-0.727026	6.16786	-11.4939	1.06263e-06	1.33415e-05	5.70796
ENSMUSG00000036111	Lmo1	109594	LIM domain only 1	2.47268	2.3231	11.4941	1.0625e-06	1.33415e-05	6.23748
ENSMUSG00000098188	Sowahc	268301	sosondowah ankyrin repeat domain family member C	1.18367	5.00737	11.4906	1.06524e-06	1.33524e-05	5.91083
ENSMUSG00000031523	Dlc1	50768	deleted in liver cancer 1	3.81521	2.37715	11.4917	1.06437e-06	1.33524e-05	6.22947
ENSMUSG00000029174	Tbc1d1	57915	TBC1 domain family, member 1	-0.774198	6.07391	-11.4883	1.06704e-06	1.33642e-05	5.71892
ENSMUSG00000027347	Rasgrp1	19419	RAS guanyl releasing protein 1	-1.58024	4.1025	-11.4773	1.07578e-06	1.34516e-05	6.0695
ENSMUSG00000052751	Repin1	58887	replication initiator 1	-0.762152	6.07468	-11.4778	1.07544e-06	1.34516e-05	5.70993
ENSMUSG00000038777	Sema6c	20360	sema domain, transmembrane domain (TM), and cytoplasmic domain, (semaphorin) 6C	-1.60389	3.29394	-11.4699	1.08176e-06	1.35154e-05	6.15984
ENSMUSG00000037172	E330009J07Rik	243780	RIKEN cDNA E330009J07 gene	-1.12324	5.56281	-11.4657	1.08515e-06	1.35468e-05	5.79706
ENSMUSG00000006585	Cdt1	67177	chromatin licensing and DNA replication factor 1	-0.748894	6.38286	-11.464	1.08649e-06	1.35525e-05	5.65304
ENSMUSG00000072244	Trim6	94088	tripartite motif-containing 6	-3.00914	2.68321	-11.458	1.09136e-06	1.36021e-05	6.20937
ENSMUSG00000030980	Knop1	66356	lysine rich nucleolar protein 1	-0.609694	7.40848	-11.4551	1.09374e-06	1.36207e-05	5.51541
ENSMUSG00000028633	Ctps	51797	cytidine 5'-triphosphate synthase	-0.555666	7.71752	-11.4504	1.09757e-06	1.36574e-05	5.47581
ENSMUSG00000063873	Slc24a3	94249	solute carrier family 24 (sodium/potassium/calcium exchanger), member 3	-2.51127	3.10028	-11.4442	1.10261e-06	1.3709e-05	6.17316
ENSMUSG00000026223	Itm2c	64294	integral membrane protein 2C	0.810827	7.4352	11.4373	1.10824e-06	1.37678e-05	5.4979
ENSMUSG00000023832	Acat2	110460	acetyl-Coenzyme A acetyltransferase 2	-1.04438	7.70619	-11.4319	1.11273e-06	1.38124e-05	5.46671
ENSMUSG00000061802	Armc4	74934	armadillo repeat containing 4	6.59106	-2.67965	11.4288	1.11528e-06	1.38329e-05	4.91973
ENSMUSG00000025665	Rps6ka6	67071	ribosomal protein S6 kinase polypeptide 6	-0.706826	7.27876	-11.427	1.1168e-06	1.38406e-05	5.50859
ENSMUSG00000074622	Mafb	16658	v-maf musculoaponeurotic fibrosarcoma oncogene family, protein B (avian)	-3.70518	0.452073	-11.4217	1.12119e-06	1.38838e-05	5.86945
ENSMUSG00000061100	Retnla	57262	resistin like alpha	9.32957	0.660361	11.4132	1.12838e-06	1.39616e-05	5.11448
ENSMUSG00000042734	Ttc9	69480	tetratricopeptide repeat domain 9	-1.64381	5.54739	-11.4094	1.13157e-06	1.39898e-05	5.77669
ENSMUSG00000040860	Crocc	230872	ciliary rootlet coiled-coil, rootletin	-1.25713	4.75788	-11.399	1.14035e-06	1.4087e-05	5.8921
ENSMUSG00000028551	Cdkn2c	12580	cyclin-dependent kinase inhibitor 2C (p18, inhibits CDK4)	2.29855	2.96387	11.3914	1.14686e-06	1.4156e-05	6.13506
ENSMUSG00000022216	Psme1	19186	proteasome (prosome, macropain) activator subunit 1 (PA28 alpha)	0.879468	6.82694	11.3884	1.14944e-06	1.41764e-05	5.53154
ENSMUSG00000038286	Bphl	68021	biphenyl hydrolase-like (serine hydrolase, breast epithelial mucin-associated antigen)	0.758741	6.15047	11.3839	1.15334e-06	1.42131e-05	5.61817
ENSMUSG00000033697	Arhgap39	223666	Rho GTPase activating protein 39	-1.08076	5.64178	-11.3686	1.16661e-06	1.43651e-05	5.70357
ENSMUSG00000009545	Kcnq1	16535	potassium voltage-gated channel, subfamily Q, member 1	2.24069	2.44476	11.3661	1.16878e-06	1.43803e-05	6.14035
ENSMUSG00000020023	Tmcc3	319880	transmembrane and coiled coil domains 3	1.52947	3.04533	11.3623	1.17213e-06	1.441e-05	6.0955
ENSMUSG00000051397	Tacstd2	56753	tumor-associated calcium signal transducer 2	2.42575	4.23218	11.3565	1.17722e-06	1.4461e-05	5.97617
ENSMUSG00000052534	Pbx1	18514	pre B cell leukemia homeobox 1	-1.04664	5.95254	-11.3424	1.18971e-06	1.45977e-05	5.6283
ENSMUSG00000026961	Lrrc26	227618	leucine rich repeat containing 26	7.89925	-2.01248	11.3418	1.19025e-06	1.45977e-05	4.98587
ENSMUSG00000024529	Lox	16948	lysyl oxidase	2.87482	1.45816	11.338	1.19364e-06	1.46276e-05	6.07633
ENSMUSG00000015224	Cyp2j9	74519	cytochrome P450, family 2, subfamily j, polypeptide 9	2.91998	1.24731	11.3347	1.19658e-06	1.46519e-05	6.04595
ENSMUSG00000028559	Osbpl9	100273	oxysterol binding protein-like 9	0.720058	6.93091	11.3269	1.20363e-06	1.46914e-05	5.46705
ENSMUSG00000028128	F3	14066	coagulation factor III	1.52117	5.14857	11.3273	1.20326e-06	1.46914e-05	5.76642
ENSMUSG00000044037	Als2cl	235633	ALS2 C-terminal like	2.05392	3.86136	11.3282	1.20241e-06	1.46914e-05	5.99123
ENSMUSG00000029375	Cxcl15	20309	chemokine (C-X-C motif) ligand 15	2.414	5.53524	11.3276	1.20298e-06	1.46914e-05	5.74362
ENSMUSG00000027408	Cpxm1	56264	carboxypeptidase X 1 (M14 family)	-2.62366	4.44034	-11.3243	1.20601e-06	1.47087e-05	5.93813
ENSMUSG00000040282	BC052040	399568	cDNA sequence BC052040	-0.979647	4.95572	-11.3055	1.22316e-06	1.49015e-05	5.77182
ENSMUSG00000029730	Mcm7	17220	minichromosome maintenance complex component 7	-0.494256	8.83338	-11.3048	1.22376e-06	1.49015e-05	5.23215
ENSMUSG00000039154	Shd	20420	src homology 2 domain-containing transforming protein D	-2.79221	2.02682	-11.2978	1.23021e-06	1.49683e-05	6.0858
ENSMUSG00000037353	Letmd1	68614	LETM1 domain containing 1	-0.852888	5.7446	-11.292	1.23558e-06	1.50216e-05	5.61561
ENSMUSG00000045319	Proser2	227545	proline and serine rich 2	2.23945	2.69837	11.2801	1.24671e-06	1.5145e-05	6.06542
ENSMUSG00000032740	Ccdc88a	108686	coiled coil domain containing 88A	-1.12335	5.56461	-11.2773	1.2494e-06	1.51656e-05	5.64443
ENSMUSG00000028863	Meaf6	70088	MYST/Esa1-associated factor 6	-0.792946	5.49433	-11.2746	1.25191e-06	1.51841e-05	5.64346
ENSMUSG00000019905	Gprc6a	210198	G protein-coupled receptor, family C, group 6, member A	-5.98445	-2.53365	-11.2692	1.25706e-06	1.52345e-05	4.84182
ENSMUSG00000014704	Hoxa2	15399	homeobox A2	-6.43377	-2.35374	-11.2542	1.27133e-06	1.53832e-05	4.8747
ENSMUSG00000022836	Mylk	107589	myosin, light polypeptide kinase	2.84678	1.41444	11.2549	1.2707e-06	1.53832e-05	6.01396
ENSMUSG00000038668	Lpar1	14745	lysophosphatidic acid receptor 1	-0.842449	6.19851	-11.2442	1.28098e-06	1.5479e-05	5.50304
ENSMUSG00000034168	Irf2bpl	238330	interferon regulatory factor 2 binding protein-like	1.70499	6.14953	11.2439	1.28127e-06	1.5479e-05	5.5321
ENSMUSG00000021636	Marveld2	218518	MARVEL (membrane-associating) domain containing 2	-0.697328	6.08697	-11.2404	1.28463e-06	1.55075e-05	5.51363
ENSMUSG00000044162	Tnip3	414084	TNFAIP3 interacting protein 3	3.20579	2.08532	11.2386	1.2864e-06	1.55166e-05	6.04261
ENSMUSG00000002010	Idh3g	15929	isocitrate dehydrogenase 3 (NAD+), gamma	0.665044	7.53976	11.2318	1.29301e-06	1.55841e-05	5.31645
ENSMUSG00000038587	Akap12	83397	A kinase (PRKA) anchor protein (gravin) 12	-1.68592	3.44067	-11.2279	1.29691e-06	1.56188e-05	5.95826
ENSMUSG00000074886	Grk6	26385	G protein-coupled receptor kinase 6	-0.749484	6.98879	-11.2258	1.29889e-06	1.56304e-05	5.37902
ENSMUSG00000057156	Homez	239099	homeodomain leucine zipper-encoding gene	-0.76169	5.75148	-11.2216	1.30305e-06	1.5656e-05	5.55414
ENSMUSG00000045594	Glb1	12091	galactosidase, beta 1	0.683092	6.28979	11.2219	1.30278e-06	1.5656e-05	5.46426
ENSMUSG00000053293	Pom121	107939	nuclear pore membrane protein 121	-0.971551	6.5865	-11.2194	1.30522e-06	1.56672e-05	5.42935
ENSMUSG00000001785	Pwp1	103136	PWP1 homolog, endonuclein	-0.59531	6.94974	-11.2186	1.30602e-06	1.56672e-05	5.37636
ENSMUSG00000031980	Agt	11606	angiotensinogen (serpin peptidase inhibitor, clade A, member 8)	-3.61302	1.98703	-11.2175	1.30714e-06	1.56683e-05	6.01077
ENSMUSG00000066621	Tecpr1	70381	tectonin beta-propeller repeat containing 1	0.852872	5.62196	11.2106	1.31398e-06	1.5738e-05	5.56446
ENSMUSG00000037458	Azin1	54375	antizyme inhibitor 1	0.686235	7.44245	11.1977	1.32685e-06	1.58798e-05	5.29962
ENSMUSG00000021087	Rtn1	104001	reticulon 1	-4.46727	1.26654	-11.1928	1.33185e-06	1.59148e-05	5.85576
ENSMUSG00000020888	Dvl2	13543	dishevelled segment polarity protein 2	-0.735179	6.02319	-11.1931	1.33154e-06	1.59148e-05	5.48545
ENSMUSG00000006675	P4htm	74443	prolyl 4-hydroxylase, transmembrane (endoplasmic reticulum)	-1.48981	3.92601	-11.1913	1.33338e-06	1.59207e-05	5.86511
ENSMUSG00000029368	Alb	11657	albumin	7.11944	-1.7039	11.1896	1.33502e-06	1.5928e-05	4.90848
ENSMUSG00000024837	Dmrt1	50796	doublesex and mab-3 related transcription factor 1	-6.79023	-2.58733	-11.1876	1.33704e-06	1.59397e-05	4.8366
ENSMUSG00000090035	Galnt4	14426	UDP-N-acetyl-alpha-D-galactosamine:polypeptide N-acetylgalactosaminyltransferase 4	1.26561	4.66411	11.1829	1.34184e-06	1.59844e-05	5.72837
ENSMUSG00000025630	Hprt	15452	hypoxanthine guanine phosphoribosyl transferase	0.721099	6.94093	11.1772	1.34772e-06	1.60421e-05	5.34261
ENSMUSG00000024197	Plin3	66905	perilipin 3	0.659873	7.39772	11.174	1.35091e-06	1.60675e-05	5.28503
ENSMUSG00000046169	Adamts6	108154	a disintegrin-like and metallopeptidase (reprolysin type) with thrombospondin type 1 motif, 6	1.73489	3.46706	11.1721	1.35295e-06	1.60794e-05	5.90854
ENSMUSG00000023988	Bysl	53414	bystin-like	-0.814685	5.99839	-11.1692	1.35589e-06	1.61018e-05	5.47182
ENSMUSG00000031207	Msn	17698	moesin	0.879582	8.6954	11.1621	1.36323e-06	1.61765e-05	5.13028
ENSMUSG00000073409	H2-Q6	15019	histocompatibility 2, Q region locus 6	-2.89673	1.31592	-11.1508	1.37498e-06	1.62926e-05	5.9206
ENSMUSG00000021025	Nfkbia	18035	nuclear factor of kappa light polypeptide gene enhancer in B cells inhibitor, alpha	0.827553	5.39036	11.1507	1.37513e-06	1.62926e-05	5.55631
ENSMUSG00000031066	Usp11	236733	ubiquitin specific peptidase 11	-0.869726	6.47961	-11.1417	1.38458e-06	1.63918e-05	5.37813
ENSMUSG00000036334	Igsf10	242050	immunoglobulin superfamily, member 10	-1.80733	2.75424	-11.136	1.39061e-06	1.64505e-05	5.94866
ENSMUSG00000027359	Slc27a2	26458	solute carrier family 27 (fatty acid transporter), member 2	-2.09448	2.2315	-11.132	1.39482e-06	1.64623e-05	5.96864
ENSMUSG00000027300	Ubox5	140629	U box domain containing 5	-0.836659	5.50354	-11.1327	1.39409e-06	1.64623e-05	5.52688
ENSMUSG00000039768	Dnajc11	230935	DnaJ heat shock protein family (Hsp40) member C11	-0.618639	7.35848	-11.1339	1.3928e-06	1.64623e-05	5.25754
ENSMUSG00000036813	Entpd8	72090	ectonucleoside triphosphate diphosphohydrolase 8	6.30955	-2.13135	11.1289	1.3981e-06	1.64884e-05	4.82023
ENSMUSG00000046380	Jrk	16469	jerky	-0.895646	5.41	-11.1277	1.39944e-06	1.64915e-05	5.54143
ENSMUSG00000028466	Creb3	12913	cAMP responsive element binding protein 3	0.950434	5.38471	11.1255	1.40176e-06	1.64935e-05	5.53979
ENSMUSG00000008384	Sertad1	55942	SERTA domain containing 1	1.02237	4.53935	11.1259	1.40139e-06	1.64935e-05	5.69761
ENSMUSG00000052889	Prkcb	18751	protein kinase C, beta	-5.4426	0.353531	-11.1175	1.41033e-06	1.65346e-05	5.43772
ENSMUSG00000064264	Zfp428	232969	zinc finger protein 428	-1.29676	4.21598	-11.1162	1.41171e-06	1.65346e-05	5.75713
ENSMUSG00000042680	Garem1	381126	GRB2 associated regulator of MAPK1 subtype 1	-0.992764	5.19692	-11.1193	1.40842e-06	1.65346e-05	5.57657
ENSMUSG00000028223	Decr1	67460	2,4-dienoyl CoA reductase 1, mitochondrial	0.712811	6.1592	11.1171	1.41082e-06	1.65346e-05	5.39717
ENSMUSG00000029185	Fam114a1	68303	family with sequence similarity 114, member A1	0.916744	5.37954	11.1174	1.41045e-06	1.65346e-05	5.53323
ENSMUSG00000023367	Tmem176a	66058	transmembrane protein 176A	1.26948	5.74678	11.118	1.40978e-06	1.65346e-05	5.47958
ENSMUSG00000048503	Tmem136	235300	transmembrane protein 136	-2.79579	2.09594	-11.1104	1.418e-06	1.65955e-05	5.95017
ENSMUSG00000022175	Lrp10	65107	low-density lipoprotein receptor-related protein 10	1.11994	6.79745	11.1092	1.41932e-06	1.65984e-05	5.30856
ENSMUSG00000073002	Vamp5	53620	vesicle-associated membrane protein 5	5.0715	-0.299856	11.1034	1.42558e-06	1.66589e-05	5.26459
ENSMUSG00000033184	Tmed7	66676	transmembrane p24 trafficking protein 7	0.643775	8.01061	11.0954	1.43433e-06	1.67376e-05	5.14998
ENSMUSG00000039934	Gsap	212167	gamma-secretase activating protein	4.49587	2.0926	11.0953	1.4345e-06	1.67376e-05	5.91246
ENSMUSG00000017344	Vtn	22370	vitronectin	-6.85936	-1.32516	-11.0942	1.43564e-06	1.67383e-05	4.87998
ENSMUSG00000039693	Msantd3	66665	Myb/SANT-like DNA-binding domain containing 3	-1.05846	4.74029	-11.0893	1.44103e-06	1.67883e-05	5.63773
ENSMUSG00000033227	Wnt6	22420	wingless-type MMTV integration site family, member 6	-5.5281	-2.19128	-11.0845	1.44638e-06	1.68379e-05	4.76679
ENSMUSG00000025017	Pik3ap1	83490	phosphoinositide-3-kinase adaptor protein 1	-2.31203	3.40462	-11.0834	1.44763e-06	1.68396e-05	5.86221
ENSMUSG00000028955	Vamp3	22319	vesicle-associated membrane protein 3	0.75881	6.93483	11.0818	1.44932e-06	1.68466e-05	5.26443
ENSMUSG00000006567	Atp7b	11979	ATPase, Cu++ transporting, beta polypeptide	-1.6175	3.8081	-11.0669	1.46597e-06	1.70162e-05	5.7848
ENSMUSG00000041959	S100a10	20194	S100 calcium binding protein A10 (calpactin)	1.26128	5.15125	11.0668	1.46613e-06	1.70162e-05	5.54385
ENSMUSG00000021670	Hmgcr	15357	3-hydroxy-3-methylglutaryl-Coenzyme A reductase	-0.947484	7.47837	-11.0631	1.47028e-06	1.70257e-05	5.18782
ENSMUSG00000050244	Heatr1	217995	HEAT repeat containing 1	-0.67637	6.67257	-11.0632	1.47016e-06	1.70257e-05	5.28328
ENSMUSG00000024653	Scgb1a1	22287	secretoglobin, family 1A, member 1 (uteroglobin)	8.21747	-1.21388	11.0632	1.47017e-06	1.70257e-05	4.89103
ENSMUSG00000048351	Coa7	69893	cytochrome c oxidase assembly factor 7	-0.720812	5.82166	-11.0485	1.48679e-06	1.71942e-05	5.39824
ENSMUSG00000032372	Plscr2	18828	phospholipid scramblase 2	6.46856	-1.18192	11.0483	1.48707e-06	1.71942e-05	4.84936
ENSMUSG00000029767	Calu	12321	calumenin	0.504786	9.40212	11.0466	1.48896e-06	1.72032e-05	4.9505
ENSMUSG00000058690	Ccser2	72972	coiled-coil serine rich 2	0.874798	6.00222	11.0446	1.49125e-06	1.72167e-05	5.3642
ENSMUSG00000024986	Hhex	15242	hematopoietically expressed homeobox	3.25807	1.15855	11.043	1.49309e-06	1.72249e-05	5.81804
ENSMUSG00000019975	Ikbip	67454	IKBKB interacting protein	1.1835	4.53303	11.0387	1.4981e-06	1.72697e-05	5.63172
ENSMUSG00000039055	Eme1	268465	essential meiotic structure-specific endonuclease 1	-1.24441	5.87775	-11.0365	1.5006e-06	1.72727e-05	5.39594
ENSMUSG00000056131	Pgm3	109785	phosphoglucomutase 3	0.866641	6.01783	11.0366	1.50049e-06	1.72727e-05	5.35504
ENSMUSG00000038552	Fndc4	64339	fibronectin type III domain containing 4	-0.834976	6.21611	-11.0328	1.50487e-06	1.72958e-05	5.32523
ENSMUSG00000039176	Polg	18975	polymerase (DNA directed), gamma	0.675545	7.06414	11.0336	1.50397e-06	1.72958e-05	5.20768
ENSMUSG00000001120	Pcbp3	59093	poly(rC) binding protein 3	-1.2209	4.32658	-11.03	1.50808e-06	1.73198e-05	5.66685
ENSMUSG00000035984	Nme5	75533	NME/NM23 family member 5	3.8041	1.3156	11.0277	1.51079e-06	1.73379e-05	5.80412
ENSMUSG00000044694	2010007H06Rik	NA	RIKEN cDNA 2010007H06 gene	2.75052	1.32734	11.0219	1.51749e-06	1.74019e-05	5.84267
ENSMUSG00000073802	Cdkn2b	12579	cyclin-dependent kinase inhibitor 2B (p15, inhibits CDK4)	3.18188	1.79705	11.0184	1.52164e-06	1.74364e-05	5.86747
ENSMUSG00000008958	Vps72	21427	vacuolar protein sorting 72	-0.606442	7.14467	-11.0153	1.52526e-06	1.74649e-05	5.18362
ENSMUSG00000037148	Arhgap10	78514	Rho GTPase activating protein 10	-1.11948	4.48006	-10.9975	1.54626e-06	1.76921e-05	5.61099
ENSMUSG00000007613	Tgfbr1	21812	transforming growth factor, beta receptor I	-0.595237	7.78229	-10.9896	1.55573e-06	1.77872e-05	5.08769
ENSMUSG00000034484	Snx2	67804	sorting nexin 2	0.713137	7.35786	10.988	1.55765e-06	1.77959e-05	5.13466
ENSMUSG00000021866	Anxa11	11744	annexin A11	1.56448	2.72754	10.9853	1.56091e-06	1.78199e-05	5.82738
ENSMUSG00000068856	Sf3b4	107701	splicing factor 3b, subunit 4	-0.626736	7.1124	-10.9757	1.57244e-06	1.79315e-05	5.15446
ENSMUSG00000021270	Hsp90aa1	15519	heat shock protein 90, alpha (cytosolic), class A member 1	-0.59097	9.00312	-10.9753	1.57302e-06	1.79315e-05	4.93806
ENSMUSG00000000216	Scnn1g	20278	sodium channel, nonvoltage-gated 1 gamma	1.59675	4.78184	10.9722	1.5767e-06	1.79602e-05	5.5459
ENSMUSG00000039630	Hnrnpu	51810	heterogeneous nuclear ribonucleoprotein U	-0.494242	9.88491	-10.9639	1.58692e-06	1.80632e-05	4.82353
ENSMUSG00000020427	Igfbp3	16009	insulin-like growth factor binding protein 3	-2.17571	3.00569	-10.9621	1.58911e-06	1.80747e-05	5.79966
ENSMUSG00000074577	Fam65c	69553	family with sequence similarity 65, member C	3.53629	-0.147026	10.958	1.5942e-06	1.81191e-05	5.44006
ENSMUSG00000028433	Ubap2	68926	ubiquitin-associated protein 2	-0.632842	7.82941	-10.9551	1.5977e-06	1.81258e-05	5.05354
ENSMUSG00000039208	Metrnl	210029	meteorin, glial cell differentiation regulator-like	0.932028	4.87447	10.9558	1.59683e-06	1.81258e-05	5.49393
ENSMUSG00000042444	Fam63b	235461	family with sequence similarity 63, member B	1.02889	5.13061	10.9546	1.59833e-06	1.81258e-05	5.44726
ENSMUSG00000040254	Sema3d	108151	sema domain, immunoglobulin domain (Ig), short basic domain, secreted, (semaphorin) 3D	-1.57969	3.49738	-10.9533	1.6e-06	1.81314e-05	5.73081
ENSMUSG00000032898	Fbxo21	231670	F-box protein 21	-0.629102	7.37566	-10.9492	1.605e-06	1.81747e-05	5.10087
ENSMUSG00000038990	Cables2	252966	CDK5 and Abl enzyme substrate 2	-0.634918	6.45953	-10.9424	1.61353e-06	1.82578e-05	5.21014
ENSMUSG00000040703	Cyp2s1	74134	cytochrome P450, family 2, subfamily s, polypeptide 1	1.94957	3.04708	10.9408	1.61549e-06	1.82664e-05	5.7713
ENSMUSG00000081752	Gm14680	NA	predicted gene 14680	-1.53453	2.89042	-10.9368	1.62051e-06	1.83097e-05	5.77846
ENSMUSG00000001098	Kctd10	330171	potassium channel tetramerisation domain containing 10	1.06502	6.01876	10.9325	1.62595e-06	1.83577e-05	5.2728
ENSMUSG00000053552	Ebf4	228598	early B cell factor 4	-1.93834	2.10834	-10.9309	1.62793e-06	1.83666e-05	5.8165
ENSMUSG00000049916	2610318N02Rik	70458	RIKEN cDNA 2610318N02 gene	-0.915961	5.24756	-10.9271	1.63269e-06	1.84068e-05	5.40531
ENSMUSG00000087201	Gm15261	NA	predicted gene 15261	2.67962	1.61309	10.9258	1.63434e-06	1.84118e-05	5.79719
ENSMUSG00000092274	Neat1	NA	nuclear paraspeckle assembly transcript 1 (non-protein coding)	3.85775	3.92065	10.9242	1.63638e-06	1.84213e-05	5.7252
ENSMUSG00000041879	Ipo9	226432	importin 9	-0.672266	8.54872	-10.9142	1.64914e-06	1.85466e-05	4.93841
ENSMUSG00000037990	Sh3rf3	237353	SH3 domain containing ring finger 3	1.55823	3.98499	10.9136	1.64993e-06	1.85466e-05	5.6283
ENSMUSG00000062661	Ncs1	14299	neuronal calcium sensor 1	-1.72024	5.50114	-10.9068	1.65861e-06	1.86305e-05	5.37695
ENSMUSG00000024922	Ovol1	18426	ovo like zinc finger 1	2.21704	1.83318	10.9053	1.66059e-06	1.86392e-05	5.79544
ENSMUSG00000020695	Mrc2	17534	mannose receptor, C type 2	1.10173	6.42855	10.9032	1.66322e-06	1.8655e-05	5.18636
ENSMUSG00000025579	Gaa	14387	glucosidase, alpha, acid	0.618362	7.54185	10.8929	1.67664e-06	1.87918e-05	5.03218
ENSMUSG00000002957	Ap2a2	11772	adaptor-related protein complex 2, alpha 2 subunit	-0.59645	7.56354	-10.8756	1.69928e-06	1.90228e-05	5.01637
ENSMUSG00000024906	Mus81	71711	MUS81 structure-specific endonuclease subunit	0.822724	5.32199	10.8753	1.69973e-06	1.90228e-05	5.34004
ENSMUSG00000037664	Cdkn1c	12577	cyclin-dependent kinase inhibitor 1C (P57)	-0.574048	8.91445	-10.8722	1.70377e-06	1.90542e-05	4.86079
ENSMUSG00000058952	Cfi	12630	complement component factor i	2.19005	5.31577	10.865	1.7134e-06	1.91479e-05	5.3891
ENSMUSG00000002881	Nab1	17936	Ngfi-A binding protein 1	1.69667	5.16792	10.8604	1.71957e-06	1.92029e-05	5.38546
ENSMUSG00000021256	Vash1	238328	vasohibin 1	-3.923	-0.373298	-10.8585	1.72205e-06	1.92166e-05	5.23588
ENSMUSG00000045349	Sh2d5	230863	SH2 domain containing 5	-2.84611	0.962054	-10.8559	1.72559e-06	1.92422e-05	5.66732
ENSMUSG00000029470	P2rx4	18438	purinergic receptor P2X, ligand-gated ion channel 4	1.15747	3.84849	10.8523	1.73039e-06	1.92817e-05	5.59032
ENSMUSG00000043079	Synpo	104027	synaptopodin	1.4855	4.42824	10.8463	1.73857e-06	1.93588e-05	5.49944
ENSMUSG00000063445	Nmral1	67824	NmrA-like family domain containing 1	-0.970904	7.01986	-10.8427	1.74339e-06	1.93983e-05	5.05689
ENSMUSG00000062991	Nrg1	211323	neuregulin 1	-2.86395	1.19324	-10.835	1.75399e-06	1.95022e-05	5.68215
ENSMUSG00000020255	D10Wsu102e	28109	DNA segment, Chr 10, Wayne State University 102, expressed	-0.657846	6.45068	-10.8325	1.7573e-06	1.95249e-05	5.11884
ENSMUSG00000024805	Pcgf5	76073	polycomb group ring finger 5	1.16172	3.91449	10.8307	1.75979e-06	1.95384e-05	5.56267
ENSMUSG00000000555	Itga5	16402	integrin alpha 5 (fibronectin receptor alpha)	-1.19679	4.00477	-10.8266	1.76543e-06	1.95868e-05	5.55052
ENSMUSG00000041736	Tspo	12257	translocator protein	1.50106	4.96638	10.8223	1.77141e-06	1.9639e-05	5.38362
ENSMUSG00000051674	Dcun1d4	100737	DCN1, defective in cullin neddylation 1, domain containing 4 (S. cerevisiae)	-0.788467	6.33641	-10.8181	1.77725e-06	1.96895e-05	5.12549
ENSMUSG00000003573	Homer3	26558	homer scaffolding protein 3	-1.11934	5.1623	-10.8149	1.78172e-06	1.97014e-05	5.33437
ENSMUSG00000016477	E2f3	13557	E2F transcription factor 3	-0.835045	5.54368	-10.8164	1.77966e-06	1.97014e-05	5.25553
ENSMUSG00000035441	Myo1d	338367	myosin ID	0.946501	5.50479	10.8146	1.78217e-06	1.97014e-05	5.25802
ENSMUSG00000054967	Zfp647	239546	zinc finger protein 647	-1.21859	4.4942	-10.8091	1.78978e-06	1.97713e-05	5.45567
ENSMUSG00000050751	Pgbd5	209966	piggyBac transposable element derived 5	-4.09837	0.689628	-10.8067	1.79315e-06	1.97943e-05	5.50013
ENSMUSG00000028719	Cmpk1	66588	cytidine monophosphate (UMP-CMP) kinase 1	0.679504	6.92989	10.8027	1.79875e-06	1.98418e-05	5.02896
ENSMUSG00000023039	Krt7	110310	keratin 7	0.561002	8.64933	10.7956	1.80882e-06	1.99386e-05	4.82489
ENSMUSG00000070469	Adamtsl3	269959	ADAMTS-like 3	6.64762	0.351022	10.7913	1.81484e-06	1.99905e-05	5.09414
ENSMUSG00000029330	Cds1	74596	CDP-diacylglycerol synthase 1	1.53241	4.31876	10.7883	1.81916e-06	2.00238e-05	5.47144
ENSMUSG00000022055	Nefl	18039	neurofilament, light polypeptide	-3.9698	0.0387387	-10.7843	1.82489e-06	2.00294e-05	5.32384
ENSMUSG00000082229	Nap1l2	17954	nucleosome assembly protein 1-like 2	-2.47237	1.76104	-10.7868	1.82132e-06	2.00294e-05	5.70015
ENSMUSG00000020027	Socs2	216233	suppressor of cytokine signaling 2	0.751557	5.76189	10.7849	1.82396e-06	2.00294e-05	5.18258
ENSMUSG00000027447	Cst3	13010	cystatin C	0.831106	7.12961	10.7843	1.82488e-06	2.00294e-05	4.99003
ENSMUSG00000028883	Sema3a	20346	sema domain, immunoglobulin domain (Ig), short basic domain, secreted, (semaphorin) 3A	2.30369	6.00348	10.7783	1.83351e-06	2.01097e-05	5.19747
ENSMUSG00000066113	Adamtsl1	77739	ADAMTS-like 1	2.97804	4.18171	10.7759	1.83701e-06	2.01337e-05	5.53505
ENSMUSG00000023861	Mpc1	55951	mitochondrial pyruvate carrier 1	1.47549	4.34382	10.7714	1.84346e-06	2.019e-05	5.4521
ENSMUSG00000039470	Zdhhc2	70546	zinc finger, DHHC domain containing 2	0.656041	6.25569	10.7681	1.84824e-06	2.02278e-05	5.08855
ENSMUSG00000031981	Capn9	73647	calpain 9	-3.08268	0.21707	-10.7662	1.85102e-06	2.02439e-05	5.44436
ENSMUSG00000042700	Sipa1l1	217692	signal-induced proliferation-associated 1 like 1	-0.958009	6.4883	-10.7611	1.85835e-06	2.03096e-05	5.05863
ENSMUSG00000030852	Tacc2	57752	transforming, acidic coiled-coil containing protein 2	-0.861602	6.42366	-10.7584	1.86239e-06	2.03392e-05	5.06354
ENSMUSG00000078607	1810010H24Rik	69066	RIKEN cDNA 1810010H24 gene	2.26446	2.316	10.7523	1.87131e-06	2.04222e-05	5.67377
ENSMUSG00000022828	Gtf2e1	74197	general transcription factor II E, polypeptide 1 (alpha subunit)	-0.708022	5.93953	-10.751	1.87313e-06	2.04275e-05	5.12782
ENSMUSG00000022949	Clic6	209195	chloride intracellular channel 6	0.585003	7.38286	10.7495	1.87548e-06	2.04386e-05	4.92819
ENSMUSG00000025964	Adam23	23792	a disintegrin and metallopeptidase domain 23	-5.48945	-1.08787	-10.7485	1.87684e-06	2.04389e-05	4.68273
ENSMUSG00000033706	Smyd5	232187	SET and MYND domain containing 5	-0.579381	7.10688	-10.7456	1.88115e-06	2.04713e-05	4.95923
ENSMUSG00000024990	Rbp4	19662	retinol binding protein 4, plasma	-2.284	2.49797	-10.7378	1.89275e-06	2.05727e-05	5.65711
ENSMUSG00000039199	Zdhhc1	70796	zinc finger, DHHC domain containing 1	0.794902	5.80309	10.7375	1.89314e-06	2.05727e-05	5.13609
ENSMUSG00000050908	Tvp23a	383103	trans-golgi network vesicle protein 23A	-1.77537	2.54111	-10.7365	1.89469e-06	2.05749e-05	5.64787
ENSMUSG00000035451	Foxa1	15375	forkhead box A1	-1.14241	7.42327	-10.7319	1.90158e-06	2.06352e-05	4.91601
ENSMUSG00000034607	Pof1b	69693	premature ovarian failure 1B	4.7196	-0.135532	10.7285	1.9067e-06	2.06761e-05	5.17135
ENSMUSG00000042372	Dmrt3	240590	doublesex and mab-3 related transcription factor 3	-9.33293	-0.101798	-10.7242	1.91314e-06	2.07284e-05	4.75729
ENSMUSG00000027247	Arhgap1	228359	Rho GTPase activating protein 1	0.688037	7.52259	10.7235	1.91422e-06	2.07284e-05	4.89015
ENSMUSG00000000197	Nalcn	338370	sodium leak channel, non-selective	-6.03883	0.148513	-10.7215	1.91713e-06	2.07452e-05	5.04026
ENSMUSG00000047686	Zcchc5	213436	zinc finger, CCHC domain containing 5	4.29658	1.28962	10.7158	1.92586e-06	2.08251e-05	5.55608
ENSMUSG00000053460	Ggcx	56316	gamma-glutamyl carboxylase	0.778641	5.33952	10.7131	1.92992e-06	2.08543e-05	5.19838
ENSMUSG00000049728	Zfp668	244219	zinc finger protein 668	-1.0942	5.05615	-10.7112	1.93277e-06	2.08574e-05	5.26552
ENSMUSG00000055912	Tmem150a	232086	transmembrane protein 150A	2.31292	2.67908	10.7111	1.93293e-06	2.08574e-05	5.62343
ENSMUSG00000090534	Gm4675	NA	predicted gene 4675	-4.94384	-2.27399	-10.7016	1.94743e-06	2.09992e-05	4.53979
ENSMUSG00000038349	Plcl1	227120	phospholipase C-like 1	-5.36004	1.30803	-10.6982	1.95278e-06	2.10421e-05	5.45201
ENSMUSG00000051306	Usp42	76800	ubiquitin specific peptidase 42	-0.935682	5.81428	-10.6962	1.95583e-06	2.10477e-05	5.10885
ENSMUSG00000036875	Dna2	327762	DNA replication helicase/nuclease 2	-0.774858	6.25095	-10.696	1.95605e-06	2.10477e-05	5.03374
ENSMUSG00000034928	Rnf44	105239	ring finger protein 44	-1.17287	6.5838	-10.6873	1.96955e-06	2.11338e-05	4.98668
ENSMUSG00000029777	Gars	353172	glycyl-tRNA synthetase	-0.560076	7.98852	-10.6888	1.96731e-06	2.11338e-05	4.8076
ENSMUSG00000096971	4930556M19Rik	NA	RIKEN cDNA 4930556M19 gene	1.2719	4.76089	10.6896	1.96609e-06	2.11338e-05	5.30073
ENSMUSG00000032508	Myd88	17874	myeloid differentiation primary response gene 88	1.40145	4.40809	10.6874	1.96945e-06	2.11338e-05	5.3676
ENSMUSG00000027070	Lrp2	14725	low density lipoprotein receptor-related protein 2	-2.31032	1.72726	-10.6797	1.9815e-06	2.12472e-05	5.61902
ENSMUSG00000025666	Tmem47	192216	transmembrane protein 47	-1.11255	5.75156	-10.6754	1.98824e-06	2.13046e-05	5.1083
ENSMUSG00000026213	Stk11ip	71728	serine/threonine kinase 11 interacting protein	-0.852544	6.26662	-10.6744	1.98973e-06	2.13057e-05	5.01463
ENSMUSG00000024534	Sncaip	67847	synuclein, alpha interacting protein (synphilin)	-2.61745	1.41644	-10.6681	1.99966e-06	2.13622e-05	5.58917
ENSMUSG00000025190	Got1	14718	glutamic-oxaloacetic transaminase 1, soluble	-0.90613	5.31263	-10.6686	1.9989e-06	2.13622e-05	5.17466
ENSMUSG00000020611	Gna13	14674	guanine nucleotide binding protein, alpha 13	0.677525	6.05688	10.6669	2.00165e-06	2.13622e-05	5.03202
ENSMUSG00000034973	Dopey1	320615	dopey family member 1	1.10533	4.42553	10.6693	1.99782e-06	2.13622e-05	5.34148
ENSMUSG00000034282	Evpl	14027	envoplakin	1.28898	5.02673	10.6667	2.00197e-06	2.13622e-05	5.23186
ENSMUSG00000037552	Plekhg2	101497	pleckstrin homology domain containing, family G (with RhoGef domain) member 2	-0.924095	5.95653	-10.6647	2.00513e-06	2.13811e-05	5.05714
ENSMUSG00000034614	Pik3ip1	216505	phosphoinositide-3-kinase interacting protein 1	-1.20256	4.17393	-10.6637	2.00663e-06	2.13822e-05	5.38779
ENSMUSG00000024222	Fkbp5	14229	FK506 binding protein 5	-0.811482	6.68179	-10.6558	2.01931e-06	2.14581e-05	4.93828
ENSMUSG00000049764	Zfp280b	64453	zinc finger protein 280B	-0.701918	6.66411	-10.6558	2.01934e-06	2.14581e-05	4.93906
ENSMUSG00000022951	Rcan1	54720	regulator of calcineurin 1	-0.693408	6.5875	-10.6566	2.01806e-06	2.14581e-05	4.94982
ENSMUSG00000030717	Nupr1	56312	nuclear protein transcription regulator 1	5.62302	0.391708	10.6565	2.01824e-06	2.14581e-05	5.17755
ENSMUSG00000036782	Klhl13	67455	kelch-like 13	-0.794533	5.30529	-10.6535	2.02305e-06	2.14827e-05	5.15953
ENSMUSG00000010936	Vac14	234729	Vac14 homolog (S. cerevisiae)	-0.688401	6.38983	-10.6445	2.03749e-06	2.1621e-05	4.96705
ENSMUSG00000041594	Tmtc4	70551	transmembrane and tetratricopeptide repeat containing 4	-1.1391	5.09637	-10.6432	2.03951e-06	2.16276e-05	5.201
ENSMUSG00000037750	Fam222b	216971	family with sequence similarity 222, member B	-0.79622	5.47117	-10.6377	2.04839e-06	2.16918e-05	5.11536
ENSMUSG00000021417	Eci2	23986	enoyl-Coenzyme A delta isomerase 2	0.737462	6.42285	10.6385	2.04724e-06	2.16918e-05	4.95472
ENSMUSG00000031617	Tmem184c	234463	transmembrane protein 184C	-0.772637	6.0402	-10.6366	2.0502e-06	2.16959e-05	5.01514
ENSMUSG00000047821	Trim16	94092	tripartite motif-containing 16	1.89546	3.76044	10.6355	2.05208e-06	2.17008e-05	5.43886
ENSMUSG00000033916	Chmp2a	68953	charged multivesicular body protein 2A	0.823722	6.30673	10.6326	2.0567e-06	2.17348e-05	4.96773
ENSMUSG00000029844	Hoxa1	15394	homeobox A1	-7.05493	-1.85919	-10.6279	2.06442e-06	2.18013e-05	4.62106
ENSMUSG00000109324	Prmt1	15469	protein arginine N-methyltransferase 1	-0.489475	8.89126	-10.6216	2.07486e-06	2.18966e-05	4.64736
ENSMUSG00000028948	Nol9	74035	nucleolar protein 9	-0.61748	6.64482	-10.6181	2.08065e-06	2.19124e-05	4.90795
ENSMUSG00000036019	Tmtc2	278279	transmembrane and tetratricopeptide repeat containing 2	2.53008	1.87941	10.6196	2.07813e-06	2.19124e-05	5.57592
ENSMUSG00000061082	Plac1	56096	placental specific protein 1	3.40746	2.32464	10.6189	2.07927e-06	2.19124e-05	5.5757
ENSMUSG00000032480	Dhx30	72831	DEAH (Asp-Glu-Ala-His) box polypeptide 30	-0.588686	7.84311	-10.6147	2.08619e-06	2.19557e-05	4.7601
ENSMUSG00000014791	Elmo3	234683	engulfment and cell motility 3	1.21881	4.74042	10.6102	2.09369e-06	2.20196e-05	5.23632
ENSMUSG00000029723	Tsc22d4	78829	TSC22 domain family, member 4	0.803812	5.89097	10.606	2.10067e-06	2.20627e-05	5.00874
ENSMUSG00000023249	Parp3	235587	poly (ADP-ribose) polymerase family, member 3	4.16325	-0.129168	10.6068	2.0994e-06	2.20627e-05	5.16061
ENSMUSG00000025496	Drd4	13491	dopamine receptor D4	-2.72863	0.520233	-10.604	2.1041e-06	2.20837e-05	5.42195
ENSMUSG00000006356	Crip2	68337	cysteine rich protein 2	0.985795	7.71204	10.6009	2.10928e-06	2.21229e-05	4.76478
ENSMUSG00000003721	Insig2	72999	insulin induced gene 2	0.754064	5.87575	10.5981	2.11389e-06	2.21464e-05	5.00347
ENSMUSG00000052105	Mtcl1	68617	microtubule crosslinking factor 1	1.02028	5.76275	10.5978	2.1144e-06	2.21464e-05	5.02893
ENSMUSG00000029504	Ddx51	69663	DEAD (Asp-Glu-Ala-Asp) box polypeptide 51	-0.722214	6.07434	-10.5965	2.11661e-06	2.21545e-05	4.97385
ENSMUSG00000014158	Trpv4	63873	transient receptor potential cation channel, subfamily V, member 4	2.81522	1.6379	10.5945	2.12001e-06	2.21749e-05	5.54708
ENSMUSG00000048388	Fam171b	241520	family with sequence similarity 171, member B	-5.7291	0.334116	-10.5904	2.12688e-06	2.22317e-05	5.07528
ENSMUSG00000033770	Clcnka	12733	chloride channel, voltage-sensitive Ka	-2.51279	2.05871	-10.5887	2.12979e-06	2.22317e-05	5.55237
ENSMUSG00000054252	Fgfr3	14184	fibroblast growth factor receptor 3	0.878201	7.38917	10.5892	2.12894e-06	2.22317e-05	4.79121
ENSMUSG00000023951	Vegfa	22339	vascular endothelial growth factor A	0.903853	6.90605	10.5872	2.13238e-06	2.22437e-05	4.84832
ENSMUSG00000033294	Noc4l	100608	NOC4 like	-0.683232	6.76492	-10.5841	2.13764e-06	2.22834e-05	4.86348
ENSMUSG00000091472	Gm3739	NA	predicted gene 3739	-3.54374	0.740673	-10.5795	2.14543e-06	2.23495e-05	5.39943
ENSMUSG00000029287	Tgfbr3	21814	transforming growth factor, beta receptor III	1.64359	4.5322	10.5776	2.1488e-06	2.23693e-05	5.26078
ENSMUSG00000028402	Mpdz	17475	multiple PDZ domain protein	-0.861754	5.89783	-10.576	2.15147e-06	2.2382e-05	4.98882
ENSMUSG00000029475	Kdm2b	30841	lysine (K)-specific demethylase 2B	-1.15737	5.97754	-10.5732	2.15619e-06	2.24159e-05	4.98288
ENSMUSG00000091475	2810468N07Rik	NA	RIKEN cDNA 2810468N07 gene	-2.13777	1.66735	-10.5702	2.1615e-06	2.24559e-05	5.53421
ENSMUSG00000054850	Smim10l2a	320237	small integral membrane protein 10 like 2A	-1.07392	5.56819	-10.5637	2.17266e-06	2.25566e-05	5.04293
ENSMUSG00000002204	Napsa	16541	napsin A aspartic peptidase	9.1283	2.62075	10.5607	2.17795e-06	2.25962e-05	5.28489
ENSMUSG00000052854	Nrk	27206	Nik related kinase	-2.17374	2.60517	-10.5568	2.18472e-06	2.26512e-05	5.50479
ENSMUSG00000028069	Gpatch4	66614	G patch domain containing 4	-0.844042	5.35272	-10.5512	2.19454e-06	2.2724e-05	5.06418
ENSMUSG00000068323	Slc4a5	232156	solute carrier family 4, sodium bicarbonate cotransporter, member 5	4.23735	2.31372	10.5511	2.1947e-06	2.2724e-05	5.52104
ENSMUSG00000037940	Inpp4b	234515	inositol polyphosphate-4-phosphatase, type II	3.72928	3.29986	10.5489	2.19846e-06	2.27475e-05	5.47621
ENSMUSG00000025047	Pdcd11	18572	programmed cell death 11	-0.911042	5.73868	-10.546	2.20362e-06	2.27801e-05	4.99177
ENSMUSG00000034333	Zbed4	223773	zinc finger, BED type containing 4	-0.766186	5.57243	-10.5454	2.20457e-06	2.27801e-05	5.01649
ENSMUSG00000037907	Ankrd13b	268445	ankyrin repeat domain 13b	-1.50423	3.56399	-10.536	2.22123e-06	2.29368e-05	5.37798
ENSMUSG00000022673	Mcm4	17217	minichromosome maintenance complex component 4	-0.570415	8.40384	-10.5317	2.22897e-06	2.30013e-05	4.6246
ENSMUSG00000031447	Lamp1	16783	lysosomal-associated membrane protein 1	0.511997	8.5427	10.5292	2.23336e-06	2.3031e-05	4.60608
ENSMUSG00000020182	Ddc	13195	dopa decarboxylase	-1.5919	5.47455	-10.5269	2.23748e-06	2.3058e-05	5.05036
ENSMUSG00000024781	Lipa	16889	lysosomal acid lipase A	-1.37482	5.15157	-10.5109	2.2664e-06	2.33405e-05	5.08744
ENSMUSG00000038146	Notch3	18131	notch 3	-1.54084	6.37267	-10.5062	2.27498e-06	2.34131e-05	4.87396
ENSMUSG00000023206	Il15ra	16169	interleukin 15 receptor, alpha chain	3.08749	0.660895	10.5045	2.27808e-06	2.34136e-05	5.37024
ENSMUSG00000024818	Slc25a45	107375	solute carrier family 25, member 45	3.90057	-0.500186	10.505	2.27703e-06	2.34136e-05	5.00087
ENSMUSG00000033955	Tnks1bp1	228140	tankyrase 1 binding protein 1	1.21603	5.11438	10.4987	2.28863e-06	2.35063e-05	5.06873
ENSMUSG00000021589	Rhobtb3	73296	Rho-related BTB domain containing 3	-0.647445	7.41989	-10.4912	2.30252e-06	2.36272e-05	4.70187
ENSMUSG00000036885	Arhgef26	622434	Rho guanine nucleotide exchange factor (GEF) 26	1.21331	5.22249	10.4906	2.30348e-06	2.36272e-05	5.0414
ENSMUSG00000023186	Vwa5a	67776	von Willebrand factor A domain containing 5A	1.05893	5.17239	10.4888	2.30696e-06	2.36472e-05	5.04453
ENSMUSG00000024312	Wdr46	57315	WD repeat domain 46	-0.813483	6.04056	-10.4862	2.31169e-06	2.36797e-05	4.8857
ENSMUSG00000024083	Pja2	224938	praja 2, RING-H2 motif containing	0.619856	7.46611	10.4823	2.31901e-06	2.3739e-05	4.68682
ENSMUSG00000044626	Liph	239759	lipase, member H	3.05445	0.97395	10.4758	2.33104e-06	2.38462e-05	5.39543
ENSMUSG00000037376	Trmt6	66926	tRNA methyltransferase 6	-0.671898	6.31383	-10.4741	2.33437e-06	2.38643e-05	4.82982
ENSMUSG00000027955	Fam198b	68659	family with sequence similarity 198, member B	1.00695	4.60371	10.4724	2.33742e-06	2.38796e-05	5.13783
ENSMUSG00000040006	Ginm1	215751	glycoprotein integral membrane 1	0.753504	6.00773	10.4655	2.35058e-06	2.39981e-05	4.8667
ENSMUSG00000020941	Map3k14	53859	mitogen-activated protein kinase kinase kinase 14	-1.32361	3.34258	-10.4619	2.35727e-06	2.40504e-05	5.34024
ENSMUSG00000019989	Enpp3	209558	ectonucleotide pyrophosphatase/phosphodiesterase 3	-4.64212	-0.219114	-10.4586	2.36351e-06	2.40865e-05	4.95669
ENSMUSG00000097504	4930516B21Rik	NA	RIKEN cDNA 4930516B21 gene	-2.12683	2.66347	-10.4584	2.36394e-06	2.40865e-05	5.42007
ENSMUSG00000029651	Mtus2	77521	microtubule associated tumor suppressor candidate 2	-1.29353	4.55176	-10.457	2.36656e-06	2.40971e-05	5.14911
ENSMUSG00000023169	Slc38a1	105727	solute carrier family 38, member 1	-0.618489	7.48747	-10.4548	2.37081e-06	2.41244e-05	4.66174
ENSMUSG00000029761	Cald1	109624	caldesmon 1	-2.37693	3.93922	-10.4535	2.37329e-06	2.41337e-05	5.28279
ENSMUSG00000062563	Cys1	12879	cystin 1	3.18928	1.12332	10.4517	2.37671e-06	2.41525e-05	5.38904
ENSMUSG00000032715	Trib3	228775	tribbles pseudokinase 3	2.2421	2.52482	10.4467	2.38631e-06	2.4234e-05	5.41835
ENSMUSG00000030898	Cckbr	12426	cholecystokinin B receptor	-3.54605	1.1383	-10.4449	2.38975e-06	2.42529e-05	5.36514
ENSMUSG00000023987	Pgc	109820	progastricsin (pepsinogen C)	4.779	3.25904	10.4427	2.39409e-06	2.42809e-05	5.42131
ENSMUSG00000034917	Tjp3	27375	tight junction protein 3	0.807329	6.23948	10.4394	2.40044e-06	2.43155e-05	4.80915
ENSMUSG00000038600	Atp6v0a4	140494	ATPase, H+ transporting, lysosomal V0 subunit A4	7.34638	-0.328427	10.4393	2.40067e-06	2.43155e-05	4.57679
ENSMUSG00000037887	Dusp8	18218	dual specificity phosphatase 8	-3.02067	0.55328	-10.4366	2.4058e-06	2.43514e-05	5.29325
ENSMUSG00000015405	Ace2	70008	angiotensin I converting enzyme (peptidyl-dipeptidase A) 2	6.26997	0.00291064	10.4288	2.42098e-06	2.44889e-05	4.80049
ENSMUSG00000029923	Rab19	19331	RAB19, member RAS oncogene family	1.183	3.98234	10.4277	2.42317e-06	2.44949e-05	5.21387
ENSMUSG00000052369	Tmem106c	380967	transmembrane protein 106C	1.04237	5.59773	10.4203	2.43773e-06	2.46258e-05	4.90529
ENSMUSG00000030870	Ubfd1	28018	ubiquitin family domain containing 1	-0.520903	8.12969	-10.4193	2.43955e-06	2.46281e-05	4.55632
ENSMUSG00000041355	Ssr2	66256	signal sequence receptor, beta	0.694905	8.28105	10.4174	2.44349e-06	2.46516e-05	4.53755
ENSMUSG00000078502	Gm13212	433801	predicted gene 13212	-3.5619	0.334601	-10.4084	2.4613e-06	2.4815e-05	5.19274
ENSMUSG00000054871	Tmem158	72309	transmembrane protein 158	-1.53034	2.69129	-10.4038	2.47034e-06	2.48735e-05	5.3629
ENSMUSG00000005823	Gpr108	78308	G protein-coupled receptor 108	0.801208	5.73814	10.4022	2.47358e-06	2.48735e-05	4.8576
ENSMUSG00000047793	Sned1	208777	sushi, nidogen and EGF-like domains 1	2.48112	1.24462	10.4029	2.47218e-06	2.48735e-05	5.38329
ENSMUSG00000067219	Nipal1	70701	NIPA-like domain containing 1	5.50394	0.17044	10.4033	2.4714e-06	2.48735e-05	4.95981
ENSMUSG00000010051	Hyal1	15586	hyaluronoglucosaminidase 1	-1.43596	3.43382	-10.3943	2.48939e-06	2.50161e-05	5.27385
ENSMUSG00000023110	Prmt5	27374	protein arginine N-methyltransferase 5	-0.49757	7.91867	-10.3855	2.50717e-06	2.51782e-05	4.55007
ENSMUSG00000026121	Sema4c	20353	sema domain, immunoglobulin domain (Ig), transmembrane domain (TM) and short cytoplasmic domain, (semaphorin) 4C	-0.949541	5.82316	-10.3831	2.51206e-06	2.52109e-05	4.83623
ENSMUSG00000038712	Fam63a	75007	family with sequence similarity 63, member A	0.753624	6.13324	10.3793	2.51989e-06	2.52555e-05	4.77148
ENSMUSG00000050410	Tcf19	106795	transcription factor 19	0.803405	5.93043	10.3785	2.52143e-06	2.52555e-05	4.80403
ENSMUSG00000039396	Neil3	234258	nei like 3 (E. coli)	1.19333	5.18316	10.3788	2.52098e-06	2.52555e-05	4.95123
ENSMUSG00000039621	Prex1	277360	phosphatidylinositol-3,4,5-trisphosphate-dependent Rac exchange factor 1	-1.64861	4.37476	-10.3753	2.52812e-06	2.53059e-05	5.12262
ENSMUSG00000022031	Elp3	74195	elongator acetyltransferase complex subunit 3	-0.609543	7.29542	-10.3681	2.54275e-06	2.54358e-05	4.60793
ENSMUSG00000025374	Nabp2	69917	nucleic acid binding protein 2	-0.769348	5.39868	-10.3621	2.55528e-06	2.55445e-05	4.889
ENSMUSG00000015488	Cacfd1	381356	calcium channel flower domain containing 1	-0.670727	7.03326	-10.3575	2.56488e-06	2.56238e-05	4.63083
ENSMUSG00000048814	Lonrf2	381338	LON peptidase N-terminal domain and ring finger 2	-2.89485	1.93279	-10.354	2.57202e-06	2.56492e-05	5.36594
ENSMUSG00000046572	Zfp518b	100515	zinc finger protein 518B	-1.17852	5.06694	-10.3538	2.57244e-06	2.56492e-05	4.95877
ENSMUSG00000024972	Lgals12	56072	lectin, galactose binding, soluble 12	1.38498	3.01621	10.3541	2.57185e-06	2.56492e-05	5.2849
ENSMUSG00000025092	Hspa12a	73442	heat shock protein 12A	-1.35287	3.18409	-10.3431	2.59504e-06	2.58578e-05	5.25942
ENSMUSG00000021939	Ctsb	13030	cathepsin B	0.729655	8.15547	10.3394	2.60268e-06	2.59171e-05	4.48271
ENSMUSG00000074736	Syndig1	433485	synapse differentiation inducing 1	2.92267	2.32548	10.3316	2.61925e-06	2.60652e-05	5.34286
ENSMUSG00000042502	Cd2bp2	70233	CD2 antigen (cytoplasmic tail) binding protein 2	-0.595022	6.72197	-10.3292	2.62441e-06	2.60996e-05	4.64456
ENSMUSG00000003380	Rabac1	14470	Rab acceptor 1 (prenylated)	1.03266	5.70339	10.3282	2.62665e-06	2.6105e-05	4.80502
ENSMUSG00000036699	Zcchc12	72693	zinc finger, CCHC domain containing 12	-3.6632	0.945655	-10.3236	2.63637e-06	2.61847e-05	5.24356
ENSMUSG00000024866	Acy3	71670	aspartoacylase (aminoacylase) 3	2.1339	1.63351	10.3228	2.63811e-06	2.6185e-05	5.34083
ENSMUSG00000039831	Arhgap29	214137	Rho GTPase activating protein 29	0.947721	6.54132	10.3198	2.64461e-06	2.62326e-05	4.6626
ENSMUSG00000030872	Gga2	74105	golgi associated, gamma adaptin ear containing, ARF binding protein 2	-0.52311	7.7293	-10.3167	2.65139e-06	2.62828e-05	4.51071
ENSMUSG00000022814	Umps	22247	uridine monophosphate synthetase	-0.724761	7.7463	-10.3111	2.66338e-06	2.63766e-05	4.50536
ENSMUSG00000037366	Pafah2	100163	platelet-activating factor acetylhydrolase 2	1.07224	5.05497	10.3107	2.66428e-06	2.63766e-05	4.91233
ENSMUSG00000031749	St3gal2	20444	ST3 beta-galactoside alpha-2,3-sialyltransferase 2	-1.13088	4.24512	-10.3093	2.66729e-06	2.63893e-05	5.07121
ENSMUSG00000026123	Plekhb2	226971	pleckstrin homology domain containing, family B (evectins) member 2	0.859567	6.76432	10.3067	2.67302e-06	2.64289e-05	4.61975
ENSMUSG00000040618	Pck2	74551	phosphoenolpyruvate carboxykinase 2 (mitochondrial)	1.12272	5.57495	10.3049	2.67687e-06	2.645e-05	4.81042
ENSMUSG00000007207	Stx1a	20907	syntaxin 1A (brain)	1.24449	3.72716	10.2984	2.69122e-06	2.65747e-05	5.14368
ENSMUSG00000024953	Prdx5	54683	peroxiredoxin 5	0.858205	5.83989	10.2945	2.6998e-06	2.66423e-05	4.74626
ENSMUSG00000031146	Plp2	18824	proteolipid protein 2	0.592092	6.7815	10.2911	2.70718e-06	2.6698e-05	4.60134
ENSMUSG00000052373	Mpp3	13384	membrane protein, palmitoylated 3 (MAGUK p55 subfamily member 3)	-1.50364	3.66653	-10.2866	2.71716e-06	2.67537e-05	5.15209
ENSMUSG00000097180	2700038G22Rik	NA	RIKEN cDNA 2700038G22 gene	-1.26307	3.86855	-10.2878	2.7146e-06	2.67537e-05	5.11759
ENSMUSG00000030609	Aen	68048	apoptosis enhancing nuclease	-1.03465	5.78452	-10.2862	2.71806e-06	2.67537e-05	4.76051
ENSMUSG00000041062	Mslnl	328783	mesothelin-like	5.90021	-0.755457	10.2839	2.72327e-06	2.67878e-05	4.49243
ENSMUSG00000079559	Gm684	100502940	predicted gene 684	1.92804	2.07176	10.2686	2.75744e-06	2.71066e-05	5.29189
ENSMUSG00000020020	Usp44	327799	ubiquitin specific peptidase 44	-3.88146	0.951682	-10.2663	2.7627e-06	2.71233e-05	5.19207
ENSMUSG00000087651	1500009L16Rik	69784	RIKEN cDNA 1500009L16 gene	-1.24263	3.84977	-10.2647	2.7662e-06	2.71233e-05	5.09991
ENSMUSG00000021190	Lgmn	19141	legumain	0.664479	5.9793	10.2653	2.76483e-06	2.71233e-05	4.69323
ENSMUSG00000020581	Agr2	23795	anterior gradient 2	4.75784	-1.31296	10.267	2.76108e-06	2.71233e-05	4.42003
ENSMUSG00000061397	Krt79	223917	keratin 79	6.06775	-1.56206	10.2638	2.76823e-06	2.71259e-05	4.40694
ENSMUSG00000046159	Chrm3	12671	cholinergic receptor, muscarinic 3, cardiac	-5.74054	-0.669271	-10.2595	2.77805e-06	2.72047e-05	4.48753
ENSMUSG00000000805	Car4	12351	carbonic anhydrase 4	-7.08895	-0.440132	-10.2527	2.7936e-06	2.73395e-05	4.46956
ENSMUSG00000019894	Slc6a15	103098	solute carrier family 6 (neurotransmitter transporter), member 15	-3.10148	1.05253	-10.2448	2.81161e-06	2.74983e-05	5.22217
ENSMUSG00000051768	Xrcc1	22594	X-ray repair complementing defective repair in Chinese hamster cells 1	-0.572558	7.09287	-10.24	2.82276e-06	2.75898e-05	4.51815
ENSMUSG00000028445	Enho	69638	energy homeostasis associated	-3.79671	0.574563	-10.2377	2.82799e-06	2.76233e-05	5.10754
ENSMUSG00000061414	Cracr2a	381812	calcium release activated channel regulator 2A	1.6252	2.56786	10.2327	2.8396e-06	2.7719e-05	5.22879
ENSMUSG00000063268	Parp10	671535	poly (ADP-ribose) polymerase family, member 10	3.97518	0.772865	10.2303	2.84529e-06	2.77569e-05	5.14344
ENSMUSG00000036854	Hspb6	243912	heat shock protein, alpha-crystallin-related, B6	1.61255	3.01365	10.2265	2.85415e-06	2.78257e-05	5.18068
ENSMUSG00000032349	Elovl5	68801	ELOVL family member 5, elongation of long chain fatty acids (yeast)	0.522843	7.48116	10.2164	2.87785e-06	2.80389e-05	4.44871
ENSMUSG00000059674	Cdh24	239096	cadherin-like 24	-1.30582	3.16944	-10.2102	2.89267e-06	2.81555e-05	5.14711
ENSMUSG00000043019	Edem3	66967	ER degradation enhancer, mannosidase alpha-like 3	0.694453	6.48308	10.2098	2.8935e-06	2.81555e-05	4.56909
ENSMUSG00000062352	Itgb1bp1	16413	integrin beta 1 binding protein 1	1.18566	5.3087	10.2091	2.89531e-06	2.81555e-05	4.77796
ENSMUSG00000024426	Atat1	73242	alpha tubulin acetyltransferase 1	-0.774753	5.8822	-10.2032	2.90938e-06	2.82565e-05	4.66127
ENSMUSG00000022947	Cbr3	109857	carbonyl reductase 3	3.47681	1.25587	10.2037	2.90812e-06	2.82565e-05	5.2067
ENSMUSG00000040624	Plekhg1	213783	pleckstrin homology domain containing, family G (with RhoGef domain) member 1	-1.72575	4.4691	-10.2002	2.91641e-06	2.83069e-05	4.95736
ENSMUSG00000025795	Rassf3	192678	Ras association (RalGDS/AF-6) domain family member 3	1.1915	5.74601	10.1957	2.92734e-06	2.8395e-05	4.68487
ENSMUSG00000025860	Xiap	11798	X-linked inhibitor of apoptosis	1.13731	4.92239	10.1935	2.93255e-06	2.84276e-05	4.83618
ENSMUSG00000046491	C1qtnf2	69183	C1q and tumor necrosis factor related protein 2	-3.86154	0.267019	-10.1858	2.95118e-06	2.85902e-05	5.00369
ENSMUSG00000038525	Armc10	67211	armadillo repeat containing 10	-0.635743	7.00319	-10.185	2.95313e-06	2.8591e-05	4.4805
ENSMUSG00000062054	Iah1	67732	isoamyl acetate-hydrolyzing esterase 1 homolog	1.02249	4.66708	10.1829	2.9582e-06	2.86221e-05	4.87369
ENSMUSG00000026890	Lhx6	16874	LIM homeobox protein 6	-3.8148	0.507079	-10.1677	2.99554e-06	2.89651e-05	5.04353
ENSMUSG00000033585	Ndn	17984	necdin	-0.867097	6.39178	-10.1663	2.99905e-06	2.89807e-05	4.5497
ENSMUSG00000027520	Zdbf2	73884	zinc finger, DBF-type containing 2	-1.63798	4.61994	-10.1653	3.00161e-06	2.89872e-05	4.89572
ENSMUSG00000027650	Tti1	75425	TELO2 interacting protein 1	-0.704429	6.48988	-10.1636	3.00573e-06	2.90088e-05	4.52987
ENSMUSG00000040152	Thbs1	21825	thrombospondin 1	-0.753214	10.3973	-10.1549	3.02728e-06	2.91984e-05	4.0538
ENSMUSG00000034640	Tiparp	99929	TCDD-inducible poly(ADP-ribose) polymerase	-0.87651	6.81739	-10.1489	3.04231e-06	2.93088e-05	4.47447
ENSMUSG00000028037	Ifi44	99899	interferon-induced protein 44	5.58176	-1.80436	10.1488	3.04254e-06	2.93088e-05	4.31064
ENSMUSG00000027405	Nop56	67134	NOP56 ribonucleoprotein	-0.702468	8.66485	-10.1469	3.04749e-06	2.9338e-05	4.25328
ENSMUSG00000040675	Mthfd1l	270685	methylenetetrahydrofolate dehydrogenase (NADP+ dependent) 1-like	-1.05779	5.41791	-10.1388	3.06784e-06	2.95155e-05	4.69717
ENSMUSG00000070822	Zscan18	232875	zinc finger and SCAN domain containing 18	-1.29837	3.80747	-10.1377	3.07069e-06	2.95244e-05	4.99723
ENSMUSG00000007610	Gtpbp3	70359	GTP binding protein 3	-1.30056	4.02538	-10.136	3.0751e-06	2.95298e-05	4.96142
ENSMUSG00000034161	Scx	20289	scleraxis	1.1252	5.96493	10.1361	3.07478e-06	2.95298e-05	4.5916
ENSMUSG00000037362	Nov	18133	nephroblastoma overexpressed gene	4.15062	1.75469	10.1345	3.07894e-06	2.95482e-05	5.17407
ENSMUSG00000024843	Chka	12660	choline kinase alpha	0.838428	7.38647	10.1294	3.09174e-06	2.96525e-05	4.38386
ENSMUSG00000106847	Peg13	NA	paternally expressed 13	-1.29904	4.39281	-10.1284	3.09445e-06	2.966e-05	4.89113
ENSMUSG00000040852	Plekhh2	213556	pleckstrin homology domain containing, family H (with MyTH4 domain) member 2	1.29967	5.98924	10.1261	3.10022e-06	2.96968e-05	4.58392
ENSMUSG00000075592	Nynrin	277154	NYN domain and retroviral integrase containing	-0.849141	5.7463	-10.1214	3.11237e-06	2.97946e-05	4.61388
ENSMUSG00000054728	Phactr1	218194	phosphatase and actin regulator 1	3.93487	1.09563	10.1194	3.11763e-06	2.98263e-05	5.11001
ENSMUSG00000024500	Ppp2r2b	72930	protein phosphatase 2, regulatory subunit B, beta	-1.09955	5.27502	-10.1173	3.12299e-06	2.9859e-05	4.70609
ENSMUSG00000004100	Ppan	235036	peter pan homolog (Drosophila)	-0.645111	6.25629	-10.1153	3.12823e-06	2.98905e-05	4.51934
ENSMUSG00000021408	Ripk1	19766	receptor (TNFRSF)-interacting serine-threonine kinase 1	0.831378	5.22762	10.114	3.13154e-06	2.99034e-05	4.69777
ENSMUSG00000028702	Rad54l	19366	RAD54 like (S. cerevisiae)	-0.756164	6.70768	-10.1117	3.13735e-06	2.99403e-05	4.45383
ENSMUSG00000037989	Wnk2	75607	WNK lysine deficient protein kinase 2	-1.66786	4.37277	-10.1107	3.14006e-06	2.99476e-05	4.89273
ENSMUSG00000032834	Pwp2	110816	PWP2 periodic tryptophan protein homolog (yeast)	-0.70011	6.05569	-10.1028	3.16065e-06	3.01066e-05	4.54063
ENSMUSG00000031217	Efnb1	13641	ephrin B1	0.939231	5.64003	10.1028	3.1606e-06	3.01066e-05	4.61261
ENSMUSG00000052430	Bmpr1b	12167	bone morphogenetic protein receptor, type 1B	-1.0152	4.90301	-10.095	3.18114e-06	3.0283e-05	4.75549
ENSMUSG00000085385	Snhg17	NA	small nucleolar RNA host gene 17	-0.690341	5.675	-10.0931	3.18635e-06	3.03137e-05	4.59641
ENSMUSG00000039781	Cep131	12009	centrosomal protein 131	-0.944792	5.73483	-10.0875	3.20111e-06	3.04142e-05	4.58878
ENSMUSG00000025529	Zfp711	245595	zinc finger protein 711	-0.840968	5.11312	-10.0868	3.20285e-06	3.04142e-05	4.70149
ENSMUSG00000032096	Arcn1	213827	archain 1	0.542878	8.87752	10.0881	3.19948e-06	3.04142e-05	4.17428
ENSMUSG00000046079	Lrrc8d	231549	leucine rich repeat containing 8D	-0.623059	6.41326	-10.0832	3.21247e-06	3.04867e-05	4.46694
ENSMUSG00000004791	Pgf	18654	placental growth factor	-1.41997	3.35265	-10.0767	3.22994e-06	3.06176e-05	5.01085
ENSMUSG00000025195	Dnmbp	71972	dynamin binding protein	-0.711472	6.23461	-10.0766	3.23025e-06	3.06176e-05	4.48906
ENSMUSG00000036109	Mbnl3	171170	muscleblind-like 3 (Drosophila)	1.52851	3.50431	10.0699	3.24814e-06	3.07681e-05	4.98313
ENSMUSG00000063297	Luzp2	233271	leucine zipper protein 2	-5.73575	-2.1621	-10.0681	3.25309e-06	3.07771e-05	4.25181
ENSMUSG00000028699	Tspan1	66805	tetraspanin 1	1.32514	4.77779	10.0686	3.25175e-06	3.07771e-05	4.75977
ENSMUSG00000026321	Tnfrsf11a	21934	tumor necrosis factor receptor superfamily, member 11a, NFKB activator	2.41784	2.79063	10.067	3.25612e-06	3.07868e-05	5.08335
ENSMUSG00000030170	Wnt5b	22419	wingless-type MMTV integration site family, member 5B	-1.53995	3.53478	-10.0583	3.27962e-06	3.09708e-05	4.97309
ENSMUSG00000019923	Zwint	52696	ZW10 interactor	-0.673722	8.2029	-10.0587	3.27859e-06	3.09708e-05	4.22553
ENSMUSG00000031555	Adam9	11502	a disintegrin and metallopeptidase domain 9 (meltrin gamma)	0.926712	6.33456	10.0569	3.28353e-06	3.09887e-05	4.45636
ENSMUSG00000086389	Gm15998	NA	predicted gene 15998	2.34644	1.66544	10.0519	3.29732e-06	3.10997e-05	5.12253
ENSMUSG00000000531	Grasp	56149	GRP1 (general receptor for phosphoinositides 1)-associated scaffold protein	1.38404	3.81851	10.0482	3.30738e-06	3.11754e-05	4.91412
ENSMUSG00000030754	Copb1	70349	coatomer protein complex, subunit beta 1	0.553411	7.9852	10.0471	3.31054e-06	3.11861e-05	4.23804
ENSMUSG00000025375	Aatk	11302	apoptosis-associated tyrosine kinase	-2.78011	1.45373	-10.0439	3.31939e-06	3.12311e-05	5.10588
ENSMUSG00000022945	Chaf1b	110749	chromatin assembly factor 1, subunit B (p60)	-0.677073	7.1041	-10.0443	3.31827e-06	3.12311e-05	4.34121
ENSMUSG00000040564	Apoc1	11812	apolipoprotein C-I	2.16078	2.22486	10.0409	3.32764e-06	3.12896e-05	5.09859
ENSMUSG00000060703	Cd302	66205	CD302 antigen	1.52107	3.54037	10.039	3.3328e-06	3.13189e-05	4.95075
ENSMUSG00000025854	Fam20c	80752	family with sequence similarity 20, member C	-0.825164	5.58722	-10.0349	3.34434e-06	3.13889e-05	4.56379
ENSMUSG00000028894	Inpp5b	16330	inositol polyphosphate-5-phosphatase B	0.710856	6.19494	10.0354	3.34274e-06	3.13889e-05	4.45392
ENSMUSG00000030861	Acadsb	66885	acyl-Coenzyme A dehydrogenase, short/branched chain	0.650187	6.10118	10.0336	3.34788e-06	3.1403e-05	4.46562
ENSMUSG00000032373	Car12	76459	carbonic anhydrase 12	-3.68875	0.679843	-10.0285	3.36221e-06	3.15182e-05	4.98101
ENSMUSG00000018169	Mfng	17305	MFNG O-fucosylpeptide 3-beta-N-acetylglucosaminyltransferase	-2.26705	1.18371	-10.0213	3.38244e-06	3.15663e-05	5.08173
ENSMUSG00000021262	Evl	14026	Ena-vasodilator stimulated phosphoprotein	-1.27622	5.41038	-10.0208	3.3838e-06	3.15663e-05	4.60184
ENSMUSG00000024556	Me2	107029	malic enzyme 2, NAD(+)-dependent, mitochondrial	-0.643999	6.89934	-10.0227	3.37851e-06	3.15663e-05	4.34689
ENSMUSG00000035828	Pim3	223775	proviral integration site 3	0.658333	6.70647	10.0243	3.37405e-06	3.15663e-05	4.37147
ENSMUSG00000029397	Rchy1	68098	ring finger and CHY zinc finger domain containing 1	0.700281	5.8711	10.0215	3.38177e-06	3.15663e-05	4.493
ENSMUSG00000035011	Zbtb7a	16969	zinc finger and BTB domain containing 7a	1.01389	4.57428	10.023	3.37765e-06	3.15663e-05	4.74876
ENSMUSG00000030681	Mvp	78388	major vault protein	1.53179	3.1298	10.024	3.37486e-06	3.15663e-05	4.99143
ENSMUSG00000026875	Traf1	22029	TNF receptor-associated factor 1	3.93346	0.625302	10.0257	3.37001e-06	3.15663e-05	4.96864
ENSMUSG00000028399	Ptprd	19266	protein tyrosine phosphatase, receptor type, D	-2.73098	1.72133	-10.0177	3.39273e-06	3.16305e-05	5.09347
ENSMUSG00000043439	Epop	103551	elongin BC and polycomb repressive complex 2 associated protein	-1.11408	4.59661	-10.0119	3.409e-06	3.17628e-05	4.74365
ENSMUSG00000002129	Sf3a1	67465	splicing factor 3a, subunit 1	-0.752078	7.47738	-10.0106	3.41283e-06	3.17793e-05	4.26636
ENSMUSG00000033792	Atp7a	11977	ATPase, Cu++ transporting, alpha polypeptide	0.986314	5.19558	9.99956	3.44441e-06	3.20539e-05	4.60512
ENSMUSG00000058056	Palld	72333	palladin, cytoskeletal associated protein	-1.221	4.53381	-9.99742	3.45058e-06	3.20919e-05	4.74652
ENSMUSG00000020432	Tcn2	21452	transcobalamin 2	0.964689	4.88431	9.99589	3.45501e-06	3.21094e-05	4.6624
ENSMUSG00000108807	4833404L02Rik	NA	RIKEN cDNA 4833404L02 gene	4.23995	-0.605283	9.99532	3.45665e-06	3.21094e-05	4.60706
ENSMUSG00000014859	E2f4	104394	E2F transcription factor 4	-0.601522	7.03169	-9.9918	3.46686e-06	3.21847e-05	4.30172
ENSMUSG00000071645	Tut1	70044	terminal uridylyl transferase 1, U6 snRNA-specific	-0.693636	5.79375	-9.99032	3.47114e-06	3.2205e-05	4.48243
ENSMUSG00000026234	Ncl	17975	nucleolin	-0.60148	9.5342	-9.98428	3.48876e-06	3.2349e-05	4.00264
ENSMUSG00000036745	Ttll7	70892	tubulin tyrosine ligase-like family, member 7	2.51158	2.5768	9.98254	3.49383e-06	3.23764e-05	5.03176
ENSMUSG00000034435	Tmem30b	238257	transmembrane protein 30B	0.901817	4.45136	9.9805	3.49981e-06	3.24123e-05	4.73206
ENSMUSG00000026933	Camsap1	227634	calmodulin regulated spectrin-associated protein 1	-1.03898	6.20651	-9.97059	3.52901e-06	3.2663e-05	4.40613
ENSMUSG00000033763	Mtss1l	244654	metastasis suppressor 1-like	-1.80612	4.07676	-9.96492	3.54581e-06	3.2779e-05	4.81761
ENSMUSG00000050335	Lgals3	16854	lectin, galactose binding, soluble 3	5.66261	2.63707	9.96554	3.54398e-06	3.2779e-05	5.04971
ENSMUSG00000028073	Pear1	73182	platelet endothelial aggregation receptor 1	2.00658	2.77046	9.96417	3.54804e-06	3.27799e-05	4.98816
ENSMUSG00000055333	Fat2	245827	FAT atypical cadherin 2	1.71607	2.27333	9.95969	3.56142e-06	3.28639e-05	5.02119
ENSMUSG00000097339	Gm26671	NA	predicted gene, 26671	5.53129	0.135363	9.96005	3.56033e-06	3.28639e-05	4.65848
ENSMUSG00000030662	Ipo5	70572	importin 5	-0.526512	8.06954	-9.95344	3.58014e-06	3.30088e-05	4.1437
ENSMUSG00000001496	Nkx2-1	21869	NK2 homeobox 1	0.535767	8.67778	9.95301	3.58142e-06	3.30088e-05	4.07389
ENSMUSG00000019726	Lyst	17101	lysosomal trafficking regulator	1.35886	3.33855	9.95079	3.58811e-06	3.30507e-05	4.89788
ENSMUSG00000059552	Trp53	22059	transformation related protein 53	-0.590241	7.44166	-9.94952	3.59195e-06	3.30661e-05	4.21321
ENSMUSG00000049300	Prmt6	99890	protein arginine N-methyltransferase 6	-0.851303	5.32315	-9.94482	3.60615e-06	3.3078e-05	4.533
ENSMUSG00000002307	Daxx	13163	Fas death domain-associated protein	-0.611532	6.47241	-9.94721	3.59891e-06	3.3078e-05	4.3347
ENSMUSG00000020496	Rnf187	108660	ring finger protein 187	-0.488058	8.57854	-9.94732	3.59858e-06	3.3078e-05	4.08042
ENSMUSG00000062908	Acadm	11364	acyl-Coenzyme A dehydrogenase, medium chain	0.732092	6.13652	9.94484	3.60608e-06	3.3078e-05	4.38085
ENSMUSG00000054065	Pkp3	56460	plakophilin 3	0.80908	5.29827	9.94503	3.60552e-06	3.3078e-05	4.53123
ENSMUSG00000023019	Gpd1	14555	glycerol-3-phosphate dehydrogenase 1 (soluble)	3.42789	1.46204	9.94651	3.60105e-06	3.3078e-05	5.02148
ENSMUSG00000046636	Gm7729	NA	predicted gene 7729	-1.44072	3.44178	-9.94343	3.61037e-06	3.30968e-05	4.88271
ENSMUSG00000056091	St3gal5	20454	ST3 beta-galactoside alpha-2,3-sialyltransferase 5	0.814469	6.16779	9.94257	3.61298e-06	3.3101e-05	4.37559
ENSMUSG00000030413	Pglyrp1	21946	peptidoglycan recognition protein 1	3.3673	0.496126	9.93323	3.64145e-06	3.33419e-05	4.90886
ENSMUSG00000055435	Maf	17132	avian musculoaponeurotic fibrosarcoma oncogene homolog	-2.94998	0.415265	-9.9276	3.65873e-06	3.34802e-05	4.90292
ENSMUSG00000040430	Pitpnc1	71795	phosphatidylinositol transfer protein, cytoplasmic 1	-0.955096	5.08306	-9.92648	3.66218e-06	3.34918e-05	4.56632
ENSMUSG00000061048	Cdh3	12560	cadherin 3	-1.00415	7.61121	-9.92344	3.67157e-06	3.35577e-05	4.17346
ENSMUSG00000028524	Sgip1	73094	SH3-domain GRB2-like (endophilin) interacting protein 1	-5.25512	-1.6725	-9.92205	3.67587e-06	3.3577e-05	4.1878
ENSMUSG00000062901	Klhl24	75785	kelch-like 24	1.00466	5.95752	9.92014	3.68178e-06	3.3611e-05	4.39347
ENSMUSG00000070348	Ccnd1	12443	cyclin D1	-2.20253	7.62641	-9.91941	3.68407e-06	3.3612e-05	4.18862
ENSMUSG00000035246	Pcyt1b	236899	phosphate cytidylyltransferase 1, choline, beta isoform	-2.14854	2.0235	-9.91703	3.69144e-06	3.36392e-05	5.00543
ENSMUSG00000042626	Shc1	20416	src homology 2 domain-containing transforming protein C1	0.682858	7.06604	9.91729	3.69064e-06	3.36392e-05	4.22831
ENSMUSG00000105813	Gm42928	NA	predicted gene 42928	-2.74055	0.306186	-9.91627	3.69381e-06	3.36408e-05	4.88588
ENSMUSG00000079436	Kcnj13	100040591	potassium inwardly-rectifying channel, subfamily J, member 13	2.76578	0.850489	9.91225	3.70633e-06	3.37348e-05	4.96302
ENSMUSG00000000303	Cdh1	12550	cadherin 1	0.848476	9.35759	9.91007	3.71314e-06	3.37769e-05	3.95567
ENSMUSG00000032353	Tmed3	66111	transmembrane p24 trafficking protein 3	0.914365	5.88288	9.90724	3.72201e-06	3.38375e-05	4.3919
ENSMUSG00000061080	Lsamp	268890	limbic system-associated membrane protein	-5.49093	-2.46869	-9.90388	3.73257e-06	3.38548e-05	4.12343
ENSMUSG00000031137	Fgf13	14168	fibroblast growth factor 13	-1.2975	3.64966	-9.9058	3.72654e-06	3.38548e-05	4.81658
ENSMUSG00000028488	Sh3gl2	20404	SH3-domain GRB2-like 2	-0.812585	5.03037	-9.90313	3.73494e-06	3.38548e-05	4.55114
ENSMUSG00000024826	Dpf2	19708	D4, zinc and double PHD fingers family 2	-0.488597	7.55426	-9.9033	3.73442e-06	3.38548e-05	4.15662
ENSMUSG00000073481	2017-03-02	67247	mitochondrial amidoxime reducing component 2	0.945683	5.82461	9.90429	3.73128e-06	3.38548e-05	4.4001
ENSMUSG00000021913	Ogdhl	239017	oxoglutarate dehydrogenase-like	-1.74558	3.02498	-9.90199	3.73854e-06	3.38674e-05	4.9054
ENSMUSG00000000628	Hk2	15277	hexokinase 2	-1.30418	6.02116	-9.90125	3.74087e-06	3.38685e-05	4.38308
ENSMUSG00000040433	Zbtb38	245007	zinc finger and BTB domain containing 38	0.748765	5.69627	9.89645	3.75605e-06	3.39859e-05	4.41055
ENSMUSG00000037339	Fam53a	74504	family with sequence similarity 53, member A	-0.674233	6.02406	-9.89497	3.76074e-06	3.40084e-05	4.35613
ENSMUSG00000041642	Kif21b	16565	kinesin family member 21B	-2.34599	2.47233	-9.88903	3.77963e-06	3.4159e-05	4.96034
ENSMUSG00000079679	Vwde	232585	von Willebrand factor D and EGF domains	-6.65306	-1.30745	-9.88693	3.78635e-06	3.41997e-05	4.22427
ENSMUSG00000035198	Tubg1	103733	tubulin, gamma 1	-0.572047	6.97752	-9.87861	3.81306e-06	3.44207e-05	4.20443
ENSMUSG00000027067	Ssrp1	20833	structure specific recognition protein 1	-0.400126	9.22033	-9.87531	3.82369e-06	3.44964e-05	3.93894
ENSMUSG00000056666	Retsat	67442	retinol saturase (all trans retinol 13,14 reductase)	1.72963	3.86006	9.87126	3.83682e-06	3.45945e-05	4.75937
ENSMUSG00000024498	Tcerg1	56070	transcription elongation regulator 1 (CA150)	-0.504135	7.97757	-9.86983	3.84147e-06	3.46161e-05	4.07696
ENSMUSG00000079560	Hoxa3	15400	homeobox A3	-6.11491	-1.80583	-9.86586	3.85438e-06	3.4712e-05	4.17443
ENSMUSG00000049420	Tmem200a	77220	transmembrane protein 200A	-6.39587	-1.92592	-9.86174	3.86782e-06	3.48007e-05	4.17362
ENSMUSG00000030228	Pik3c2g	18705	phosphatidylinositol 3-kinase, C2 domain containing, gamma polypeptide	3.25485	1.65393	9.86146	3.86876e-06	3.48007e-05	4.96287
ENSMUSG00000031139	Mcf2	109904	mcf.2 transforming sequence	-2.18545	1.98857	-9.85429	3.8923e-06	3.49813e-05	4.95409
ENSMUSG00000037992	Rara	19401	retinoic acid receptor, alpha	-1.00596	4.84119	-9.85396	3.89339e-06	3.49813e-05	4.54944
ENSMUSG00000048387	Osr1	23967	odd-skipped related 1 (Drosophila)	-3.02546	0.690974	-9.85083	3.90372e-06	3.50536e-05	4.88102
ENSMUSG00000054934	Kcnmb4	58802	potassium large conductance calcium-activated channel, subfamily M, beta member 4	-2.58141	0.630398	-9.84207	3.93282e-06	3.52533e-05	4.88323
ENSMUSG00000024824	Rad9a	19367	RAD9 checkpoint clamp component A	-0.853587	5.23199	-9.84206	3.93285e-06	3.52533e-05	4.45698
ENSMUSG00000020607	Fam84a	105005	family with sequence similarity 84, member A	1.93313	2.42593	9.84281	3.93035e-06	3.52533e-05	4.9129
ENSMUSG00000028226	Mmp16	17389	matrix metallopeptidase 16	-5.60854	0.757229	-9.84064	3.93758e-06	3.52546e-05	4.70958
ENSMUSG00000021149	Gtpbp4	69237	GTP binding protein 4	-0.585272	7.02567	-9.84122	3.93563e-06	3.52546e-05	4.16398
ENSMUSG00000026185	Igfbp5	16011	insulin-like growth factor binding protein 5	-1.4293	8.75671	-9.83853	3.94464e-06	3.52972e-05	3.96522
ENSMUSG00000043782	Bicdl2	212733	BICD family like cargo adaptor 2	1.90129	2.16906	9.83586	3.95359e-06	3.53566e-05	4.92439
ENSMUSG00000031565	Fgfr1	14182	fibroblast growth factor receptor 1	-1.25667	6.10034	-9.83512	3.95604e-06	3.5358e-05	4.30668
ENSMUSG00000044636	Csrnp2	207785	cysteine-serine-rich nuclear protein 2	-0.794582	5.78583	-9.81329	4.03006e-06	3.59876e-05	4.32474
ENSMUSG00000026558	Uck2	80914	uridine-cytidine kinase 2	-0.785365	7.23046	-9.81296	4.03118e-06	3.59876e-05	4.1145
ENSMUSG00000018446	C1qbp	12261	complement component 1, q subcomponent binding protein	-0.567931	7.38427	-9.80243	4.06743e-06	3.62902e-05	4.08411
ENSMUSG00000028228	Cpne3	70568	copine III	0.643617	6.42129	9.79669	4.08736e-06	3.64468e-05	4.20087
ENSMUSG00000085125	Gm16070	NA	predicted gene 16070	-6.06818	-2.36779	-9.79014	4.11019e-06	3.66291e-05	4.08985
ENSMUSG00000038879	Nipal2	223473	NIPA-like domain containing 2	0.917904	5.1259	9.78824	4.11686e-06	3.6646e-05	4.42448
ENSMUSG00000003154	Foxj2	60611	forkhead box J2	0.978941	4.66188	9.78871	4.11519e-06	3.6646e-05	4.51872
ENSMUSG00000035245	Eogt	101351	EGF domain-specific O-linked N-acetylglucosamine (GlcNAc) transferase	0.905382	5.13645	9.78362	4.13309e-06	3.67691e-05	4.4176
ENSMUSG00000057914	Cacnb2	12296	calcium channel, voltage-dependent, beta 2 subunit	-1.63687	2.90122	-9.78139	4.14094e-06	3.67782e-05	4.81093
ENSMUSG00000057113	Npm1	18148	nucleophosmin 1	-0.434259	9.13699	-9.78129	4.14129e-06	3.67782e-05	3.86156
ENSMUSG00000004951	Hspb1	15507	heat shock protein 1	2.07316	1.89439	9.78139	4.14094e-06	3.67782e-05	4.89261
ENSMUSG00000034780	B3galt1	26877	UDP-Gal:betaGlcNAc beta 1,3-galactosyltransferase, polypeptide 1	-2.70484	0.853014	-9.77951	4.14759e-06	3.68129e-05	4.85524
ENSMUSG00000057614	Gnai1	14677	guanine nucleotide binding protein (G protein), alpha inhibiting 1	0.921507	5.60335	9.77364	4.16838e-06	3.6976e-05	4.31872
ENSMUSG00000049657	Zbtb5	230119	zinc finger and BTB domain containing 5	-0.615203	5.91036	-9.76784	4.18907e-06	3.71166e-05	4.25632
ENSMUSG00000035852	Misp	78906	mitotic spindle positioning	1.01929	4.32485	9.76831	4.18737e-06	3.71166e-05	4.56672
ENSMUSG00000046722	Cdc42se1	57912	CDC42 small effector 1	0.516588	7.54321	9.76706	4.19186e-06	3.71199e-05	4.03062
ENSMUSG00000022602	Arc	11838	activity regulated cytoskeletal-associated protein	-2.27265	2.19054	-9.76331	4.20526e-06	3.72172e-05	4.86893
ENSMUSG00000023055	Calcoco1	67488	calcium binding and coiled coil domain 1	0.745443	6.16665	9.762	4.20997e-06	3.72373e-05	4.20791
ENSMUSG00000013622	Atraid	381629	all-trans retinoic acid induced differentiation factor	0.880294	6.23917	9.7593	4.21971e-06	3.72806e-05	4.1971
ENSMUSG00000036181	Hist1h1c	50708	histone cluster 1, H1c	1.73938	3.86395	9.75953	4.21887e-06	3.72806e-05	4.65801
ENSMUSG00000031919	Tmed6	66269	transmembrane p24 trafficking protein 6	2.79262	0.662079	9.75558	4.23312e-06	3.73776e-05	4.81936
ENSMUSG00000002341	Ncan	13004	neurocan	-3.4958	-0.521335	-9.75374	4.23978e-06	3.74149e-05	4.5232
ENSMUSG00000030339	Ltbr	17000	lymphotoxin B receptor	0.793529	5.82566	9.74957	4.25491e-06	3.75268e-05	4.25316
ENSMUSG00000030770	Parva	57342	parvin, alpha	0.598529	7.89521	9.74703	4.26414e-06	3.75435e-05	3.97168
ENSMUSG00000059555	Tor4a	227612	torsin family 4, member A	1.42431	4.21313	9.74742	4.26272e-06	3.75435e-05	4.57888
ENSMUSG00000029403	Cdkl2	53886	cyclin-dependent kinase-like 2 (CDC2-related kinase)	1.59302	2.77117	9.7474	4.26281e-06	3.75435e-05	4.79067
ENSMUSG00000028150	Rorc	19885	RAR-related orphan receptor gamma	1.76616	3.94143	9.74578	4.26871e-06	3.75622e-05	4.63433
ENSMUSG00000018401	Mtmr4	170749	myotubularin related protein 4	-0.910246	7.56389	-9.74136	4.28488e-06	3.76613e-05	4.00927
ENSMUSG00000022594	Lynx1	23936	Ly6/neurotoxin 1	3.33199	1.51405	9.74165	4.28381e-06	3.76613e-05	4.85947
ENSMUSG00000069378	Prdm6	225518	PR domain containing 6	-1.78229	2.87843	-9.74028	4.28882e-06	3.76721e-05	4.78076
ENSMUSG00000024892	Pcx	18563	pyruvate carboxylase	1.15121	5.8087	9.73969	4.29101e-06	3.76721e-05	4.25714
ENSMUSG00000024420	Zfp521	225207	zinc finger protein 521	-0.852698	5.67774	-9.73834	4.29596e-06	3.7694e-05	4.27668
ENSMUSG00000027858	Tspan2	70747	tetraspanin 2	1.73142	3.3334	9.73634	4.3033e-06	3.77368e-05	4.7145
ENSMUSG00000004865	Srpk1	20815	serine/arginine-rich protein specific kinase 1	-0.512487	7.28116	-9.73414	4.31142e-06	3.77864e-05	4.03253
ENSMUSG00000061024	Rrs1	59014	ribosome biogenesis regulator 1	-0.946859	6.20798	-9.73278	4.31643e-06	3.78088e-05	4.18391
ENSMUSG00000024833	Pola2	18969	polymerase (DNA directed), alpha 2	-0.527	7.08684	-9.72021	4.36314e-06	3.81744e-05	4.04343
ENSMUSG00000029364	Wsb2	59043	WD repeat and SOCS box-containing 2	0.610395	6.55047	9.72065	4.36151e-06	3.81744e-05	4.11198
ENSMUSG00000028960	Ube4b	63958	ubiquitination factor E4B	-0.604525	6.91733	-9.71835	4.37011e-06	3.82136e-05	4.06359
ENSMUSG00000036499	Eea1	216238	early endosome antigen 1	1.04263	4.07176	9.71438	4.38497e-06	3.83217e-05	4.56457
ENSMUSG00000101356	Gm28876	NA	predicted gene 28876	-6.66544	-2.36405	-9.70808	4.40875e-06	3.83766e-05	4.0638
ENSMUSG00000030592	Ryr1	20190	ryanodine receptor 1, skeletal muscle	-2.6337	0.930809	-9.70838	4.40759e-06	3.83766e-05	4.80655
ENSMUSG00000038256	Bcl9	77578	B cell CLL/lymphoma 9	-0.920129	4.69508	-9.7089	4.40563e-06	3.83766e-05	4.44285
ENSMUSG00000007817	Zmiz1	328365	zinc finger, MIZ-type containing 1	-0.919401	6.31922	-9.70984	4.40209e-06	3.83766e-05	4.1445
ENSMUSG00000017861	Mybl2	17865	myeloblastosis oncogene-like 2	-0.689437	6.32187	-9.70984	4.40208e-06	3.83766e-05	4.13863
ENSMUSG00000001674	Ddx18	66942	DEAD (Asp-Glu-Ala-Asp) box polypeptide 18	-0.574586	6.59094	-9.70855	4.40694e-06	3.83766e-05	4.09703
ENSMUSG00000055116	Arntl	11865	aryl hydrocarbon receptor nuclear translocator-like	0.800796	4.97153	9.70855	4.40697e-06	3.83766e-05	4.37871
ENSMUSG00000031561	Tenm3	23965	teneurin transmembrane protein 3	-7.69992	0.502882	-9.7055	4.41851e-06	3.8418e-05	4.27591
ENSMUSG00000024817	Uhrf2	109113	ubiquitin-like, containing PHD and RING finger domains 2	-0.516436	7.1901	-9.70581	4.41732e-06	3.8418e-05	4.01717
ENSMUSG00000097415	AU020206	NA	expressed sequence AU020206	-1.21619	3.88079	-9.70065	4.43692e-06	3.84963e-05	4.59331
ENSMUSG00000048799	Cep120	225523	centrosomal protein 120	-0.733602	6.28219	-9.70138	4.43414e-06	3.84963e-05	4.13777
ENSMUSG00000035274	Tpbg	21983	trophoblast glycoprotein	-0.602259	6.02797	-9.70148	4.43376e-06	3.84963e-05	4.17487
ENSMUSG00000015002	Efr3a	76740	EFR3 homolog A	0.512839	7.23347	9.70049	4.43754e-06	3.84963e-05	4.00561
ENSMUSG00000034610	Zcchc11	230594	zinc finger, CCHC domain containing 11	-0.864155	6.66961	-9.69015	4.47709e-06	3.88174e-05	4.07331
ENSMUSG00000073293	Nudt10	102954	nudix (nucleoside diphosphate linked moiety X)-type motif 10	-1.59927	2.9311	-9.68834	4.48405e-06	3.88347e-05	4.72451
ENSMUSG00000074604	Mgst2	211666	microsomal glutathione S-transferase 2	2.2279	1.65091	9.68832	4.48413e-06	3.88347e-05	4.82024
ENSMUSG00000054115	Skp2	27401	S-phase kinase-associated protein 2 (p45)	-0.615025	6.22132	-9.68416	4.50017e-06	3.88859e-05	4.12846
ENSMUSG00000039770	Ypel5	383295	yippee-like 5 (Drosophila)	0.801646	5.66381	9.68572	4.49418e-06	3.88859e-05	4.22291
ENSMUSG00000023044	Csad	246277	cysteine sulfinic acid decarboxylase	0.8405	5.26338	9.68364	4.50219e-06	3.88859e-05	4.29836
ENSMUSG00000021895	Arhgef3	71704	Rho guanine nucleotide exchange factor (GEF) 3	2.4257	1.51762	9.68416	4.50019e-06	3.88859e-05	4.81719
ENSMUSG00000053559	Smagp	207818	small cell adhesion glycoprotein	3.34523	0.154313	9.68351	4.50272e-06	3.88859e-05	4.6633
ENSMUSG00000070287	Slc35g2	245020	solute carrier family 35, member G2	1.71936	2.94861	9.6823	4.50741e-06	3.89046e-05	4.7152
ENSMUSG00000021171	Esyt2	52635	extended synaptotagmin-like protein 2	0.649799	6.64399	9.67856	4.52189e-06	3.90077e-05	4.06044
ENSMUSG00000036893	Ehmt1	77683	euchromatic histone methyltransferase 1	-0.810696	7.86424	-9.67724	4.52704e-06	3.90083e-05	3.91276
ENSMUSG00000001750	Tcirg1	27060	T cell, immune regulator 1, ATPase, H+ transporting, lysosomal V0 protein A3	0.905278	4.74154	9.67744	4.52625e-06	3.90083e-05	4.39863
ENSMUSG00000044949	Ubtd2	327900	ubiquitin domain containing 2	-0.72004	5.73046	-9.67437	4.53822e-06	3.90699e-05	4.20357
ENSMUSG00000020547	Bzw2	66912	basic leucine zipper and W2 domains 2	-0.528613	7.76514	-9.6741	4.53928e-06	3.90699e-05	3.91906
ENSMUSG00000027954	Efna1	13636	ephrin A1	0.625753	7.21557	9.67157	4.54917e-06	3.91281e-05	3.9813
ENSMUSG00000027111	Itga6	16403	integrin alpha 6	0.957994	7.32775	9.67106	4.55115e-06	3.91281e-05	3.96989
ENSMUSG00000001089	Luzp1	269593	leucine zipper protein 1	-0.843732	6.48958	-9.66495	4.57514e-06	3.93124e-05	4.075
ENSMUSG00000021994	Wnt5a	22418	wingless-type MMTV integration site family, member 5A	-2.04513	2.20342	-9.66357	4.5806e-06	3.93373e-05	4.77855
ENSMUSG00000057378	Ryr3	20192	ryanodine receptor 3	1.79949	1.68775	9.66251	4.58477e-06	3.93511e-05	4.79568
ENSMUSG00000004626	Stxbp2	20911	syntaxin binding protein 2	0.51932	7.36218	9.65855	4.60043e-06	3.94635e-05	3.95066
ENSMUSG00000070780	Rbm47	245945	RNA binding motif protein 47	1.1687	5.85942	9.65424	4.61752e-06	3.9588e-05	4.16886
ENSMUSG00000057058	Skap1	78473	src family associated phosphoprotein 1	-2.43583	0.572025	-9.65209	4.62611e-06	3.96395e-05	4.73237
ENSMUSG00000055322	Tns1	21961	tensin 1	1.21394	4.92167	9.6451	4.65406e-06	3.98567e-05	4.34072
ENSMUSG00000023791	Pigx	72084	phosphatidylinositol glycan anchor biosynthesis, class X	-0.634923	6.11059	-9.64328	4.66137e-06	3.9897e-05	4.10778
ENSMUSG00000037466	4930427A07Rik	104732	RIKEN cDNA 4930427A07 gene	-0.678748	6.94455	-9.64085	4.67116e-06	3.9949e-05	3.98817
ENSMUSG00000044030	Irf2bp1	272359	interferon regulatory factor 2 binding protein 1	-0.579251	6.94705	-9.64048	4.67265e-06	3.9949e-05	3.98659
ENSMUSG00000016024	Lbp	16803	lipopolysaccharide binding protein	3.09105	2.76807	9.63922	4.67772e-06	3.99702e-05	4.73166
ENSMUSG00000019987	Arg1	11846	arginase, liver	-2.37305	2.2514	-9.63257	4.70462e-06	4.01777e-05	4.75362
ENSMUSG00000047013	Fbxo41	330369	F-box protein 41	-2.37804	0.689533	-9.62874	4.72021e-06	4.02437e-05	4.7278
ENSMUSG00000038214	Bend3	331623	BEN domain containing 3	-1.49045	3.88135	-9.62939	4.71758e-06	4.02437e-05	4.53541
ENSMUSG00000040723	Rcsd1	226594	RCSD domain containing 1	3.25229	1.06281	9.62893	4.71944e-06	4.02437e-05	4.74372
ENSMUSG00000054520	Sh3bp2	24055	SH3-domain binding protein 2	-1.42146	4.43275	-9.62663	4.72883e-06	4.02896e-05	4.4342
ENSMUSG00000023906	Cldn6	54419	claudin 6	-0.492709	9.02135	-9.62614	4.73084e-06	4.02896e-05	3.72968
ENSMUSG00000036046	5031439G07Rik	223739	RIKEN cDNA 5031439G07 gene	-1.64856	5.65668	-9.6248	4.73631e-06	4.02976e-05	4.21003
ENSMUSG00000022025	Cnmd	16840	chondromodulin	3.21606	3.20271	9.62462	4.73703e-06	4.02976e-05	4.67701
ENSMUSG00000099928	Gm29202	NA	predicted gene 29202	-6.0386	-2.2599	-9.62377	4.74052e-06	4.03049e-05	3.99781
ENSMUSG00000035407	Kank4	242553	KN motif and ankyrin repeat domains 4	5.38755	0.210395	9.62095	4.7521e-06	4.0381e-05	4.46911
ENSMUSG00000050103	Agmo	319660	alkylglycerol monooxygenase	7.06191	-2.43655	9.6181	4.76382e-06	4.04582e-05	4.01085
ENSMUSG00000032815	Fanca	14087	Fanconi anemia, complementation group A	-0.650165	5.84092	-9.61523	4.77564e-06	4.05138e-05	4.12667
ENSMUSG00000038418	Egr1	13653	early growth response 1	3.81558	3.87789	9.61586	4.77305e-06	4.05138e-05	4.6092
ENSMUSG00000034947	Tmem106a	217203	transmembrane protein 106A	2.08126	1.01597	9.61139	4.79152e-06	4.0626e-05	4.74558
ENSMUSG00000027584	Oprl1	18389	opioid receptor-like 1	-2.5158	1.5015	-9.60849	4.80354e-06	4.07055e-05	4.75259
ENSMUSG00000030084	Plxna1	18844	plexin A1	-1.05942	6.62105	-9.60773	4.80672e-06	4.071e-05	4.00681
ENSMUSG00000020534	Shmt1	20425	serine hydroxymethyltransferase 1 (soluble)	-0.742417	7.292	-9.6069	4.81016e-06	4.07167e-05	3.91367
ENSMUSG00000029634	Rnf6	74132	ring finger protein (C3H2C3 type) 6	0.655185	6.47356	9.60527	4.81695e-06	4.07517e-05	4.01475
ENSMUSG00000031639	Tlr3	142980	toll-like receptor 3	2.57651	2.04131	9.59634	4.85434e-06	4.10454e-05	4.73294
ENSMUSG00000052593	Adam17	11491	a disintegrin and metallopeptidase domain 17	0.501771	7.34449	9.59541	4.85822e-06	4.10556e-05	3.89317
ENSMUSG00000027109	Sp3	20687	trans-acting transcription factor 3	0.570068	7.19242	9.58797	4.88965e-06	4.12985e-05	3.90502
ENSMUSG00000041164	Zmiz2	52915	zinc finger, MIZ-type containing 2	-0.948214	5.99672	-9.58573	4.89914e-06	4.13559e-05	4.08112
ENSMUSG00000042766	Trim46	360213	tripartite motif-containing 46	0.906412	4.47124	9.58424	4.90549e-06	4.13867e-05	4.36624
ENSMUSG00000000876	Pxmp4	59038	peroxisomal membrane protein 4	1.16328	4.76733	9.57992	4.92387e-06	4.15109e-05	4.30996
ENSMUSG00000052861	Dnah6	330355	dynein, axonemal, heavy chain 6	3.15366	-0.579049	9.57951	4.92562e-06	4.15109e-05	4.42977
ENSMUSG00000035954	Dock4	238130	dedicator of cytokinesis 4	-1.34992	3.22394	-9.57604	4.9405e-06	4.16135e-05	4.58099
ENSMUSG00000041491	Cep78	208518	centrosomal protein 78	-0.666721	6.3932	-9.57498	4.94505e-06	4.1629e-05	4.001
ENSMUSG00000031434	Morc4	75746	microrchidia 4	1.04093	5.00204	9.57322	4.95258e-06	4.16695e-05	4.25257
ENSMUSG00000063632	Sox11	20666	SRY (sex determining region Y)-box 11	-1.26858	6.96837	-9.57031	4.9651e-06	4.17519e-05	3.92752
ENSMUSG00000104913	Gm6560	NA	predicted gene 6560	-0.923048	5.11144	-9.56774	4.97619e-06	4.1777e-05	4.22869
ENSMUSG00000073758	Sh3d21	66938	SH3 domain containing 21	1.20748	3.33604	9.56773	4.97624e-06	4.1777e-05	4.55227
ENSMUSG00000000731	Aire	11634	autoimmune regulator (autoimmune polyendocrinopathy candidiasis ectodermal dystrophy)	3.62502	1.18734	9.56813	4.9745e-06	4.1777e-05	4.69529
ENSMUSG00000020978	Klhdc2	69554	kelch domain containing 2	-0.621783	7.55656	-9.56642	4.98188e-06	4.18015e-05	3.84258
ENSMUSG00000039252	Lgi2	246316	leucine-rich repeat LGI family, member 2	-1.11542	4.06027	-9.56259	4.99848e-06	4.19179e-05	4.43353
ENSMUSG00000030510	Cers3	545975	ceramide synthase 3	1.70676	3.49921	9.56162	5.00273e-06	4.19306e-05	4.53215
ENSMUSG00000030137	Tuba8	53857	tubulin, alpha 8	5.49334	2.37767	9.56086	5.00601e-06	4.19352e-05	4.71076
ENSMUSG00000040462	Os9	216440	amplified in osteosarcoma	0.594542	7.18488	9.55635	5.02565e-06	4.20768e-05	3.87615
ENSMUSG00000002058	Unc119	22248	unc-119 lipid binding chaperone	-0.74648	5.41607	-9.55464	5.03311e-06	4.21163e-05	4.15095
ENSMUSG00000034245	Hdac11	232232	histone deacetylase 11	-1.07205	3.83245	-9.54336	5.08275e-06	4.25085e-05	4.45378
ENSMUSG00000021495	Fam193b	212483	family with sequence similarity 193, member B	-0.74847	5.77338	-9.53997	5.09776e-06	4.26108e-05	4.07054
ENSMUSG00000056758	Hmga2	15364	high mobility group AT-hook 2	-2.08454	6.82211	-9.53784	5.1072e-06	4.26143e-05	3.94316
ENSMUSG00000031839	Hsbp1	68196	heat shock factor binding protein 1	0.520603	7.5106	9.53738	5.10927e-06	4.26143e-05	3.81835
ENSMUSG00000021619	Atg10	66795	autophagy related 10	1.58875	3.29165	9.53769	5.10787e-06	4.26143e-05	4.53771
ENSMUSG00000024339	Tap2	21355	transporter 2, ATP-binding cassette, sub-family B (MDR/TAP)	4.60759	0.318458	9.53922	5.10108e-06	4.26143e-05	4.50462
ENSMUSG00000051727	Kctd14	233529	potassium channel tetramerisation domain containing 14	5.37951	1.62376	9.52906	5.14642e-06	4.29008e-05	4.6444
ENSMUSG00000029571	Tmem106b	71900	transmembrane protein 106B	0.987736	5.89241	9.5265	5.15791e-06	4.29733e-05	4.03743
ENSMUSG00000023387	Kcnk16	74571	potassium channel, subfamily K, member 16	-4.27207	0.0282167	-9.52476	5.16573e-06	4.30151e-05	4.43604
ENSMUSG00000037605	Adgrl3	319387	adhesion G protein-coupled receptor L3	-5.67206	-0.43516	-9.52258	5.17554e-06	4.30734e-05	4.14834
ENSMUSG00000026857	Ntmt1	66617	N-terminal Xaa-Pro-Lys N-methyltransferase 1	-0.826013	6.56487	-9.52134	5.18115e-06	4.30734e-05	3.92815
ENSMUSG00000042363	Lgalsl	216551	lectin, galactoside binding-like	0.736816	5.9934	9.52146	5.1806e-06	4.30734e-05	4.00962
ENSMUSG00000067367	Lyar	17089	Ly1 antibody reactive clone	-0.773316	6.31735	-9.51585	5.20601e-06	4.32567e-05	3.95847
ENSMUSG00000021273	Fdft1	14137	farnesyl diphosphate farnesyl transferase 1	-0.745387	7.15828	-9.51103	5.22792e-06	4.33518e-05	3.83921
ENSMUSG00000030894	Tpp1	12751	tripeptidyl peptidase I	0.747185	6.93391	9.51117	5.2273e-06	4.33518e-05	3.86564
ENSMUSG00000024215	Spdef	30051	SAM pointed domain containing ets transcription factor	1.84055	1.58477	9.5114	5.22623e-06	4.33518e-05	4.66836
ENSMUSG00000012519	Mlkl	74568	mixed lineage kinase domain-like	6.36422	-0.889385	9.51085	5.22876e-06	4.33518e-05	4.00195
ENSMUSG00000034898	Filip1	70598	filamin A interacting protein 1	3.84204	0.122939	9.50577	5.25196e-06	4.35207e-05	4.49479
ENSMUSG00000029238	Clock	12753	circadian locomotor output cycles kaput	0.879477	4.98223	9.50456	5.25753e-06	4.35434e-05	4.18781
ENSMUSG00000022248	Rad1	19355	RAD1 checkpoint DNA exonuclease	-0.669363	5.78063	-9.50124	5.27277e-06	4.3646e-05	4.03019
ENSMUSG00000036098	Myrf	225908	myelin regulatory factor	-1.2289	5.99796	-9.49958	5.28044e-06	4.36645e-05	4.00988
ENSMUSG00000076146	Mir449c	NA	microRNA 449c	4.24394	-1.58813	9.49953	5.28069e-06	4.36645e-05	3.92893
ENSMUSG00000047749	Zc3hav1l	209032	zinc finger CCCH-type, antiviral 1-like	-1.12002	5.68469	-9.49676	5.29344e-06	4.36994e-05	4.05906
ENSMUSG00000029267	Mtf2	17765	metal response element binding transcription factor 2	-0.770526	7.07215	-9.49698	5.29244e-06	4.36994e-05	3.83679
ENSMUSG00000032294	Pkm	18746	pyruvate kinase, muscle	-0.542038	10.5731	-9.49768	5.2892e-06	4.36994e-05	3.41872
ENSMUSG00000040289	Hey1	15213	hairy/enhancer-of-split related with YRPW motif 1	-1.74114	2.41581	-9.49127	5.31892e-06	4.38389e-05	4.60479
ENSMUSG00000020766	Galk1	14635	galactokinase 1	-0.877065	8.35939	-9.49187	5.3161e-06	4.38389e-05	3.68026
ENSMUSG00000054951	9130008F23Rik	71583	RIKEN cDNA 9130008F23 gene	1.45942	3.37102	9.49152	5.31772e-06	4.38389e-05	4.48176
ENSMUSG00000021958	Pinx1	72400	PIN2/TERF1 interacting, telomerase inhibitor 1	-0.874802	4.4755	-9.48963	5.32653e-06	4.38781e-05	4.28121
ENSMUSG00000024151	Msh2	17685	mutS homolog 2	-0.5813	8.15068	-9.48761	5.33594e-06	4.39086e-05	3.69842
ENSMUSG00000043131	Mob1a	232157	MOB kinase activator 1A	0.482112	7.6984	9.48807	5.33378e-06	4.39086e-05	3.74915
ENSMUSG00000106022	Gm42929	NA	predicted gene 42929	-1.90184	1.84196	-9.48415	5.3521e-06	4.40179e-05	4.63857
ENSMUSG00000024697	Gna14	14675	guanine nucleotide binding protein, alpha 14	2.65093	2.01322	9.48311	5.35697e-06	4.40344e-05	4.63647
ENSMUSG00000029599	Ddx54	71990	DEAD (Asp-Glu-Ala-Asp) box polypeptide 54	-0.619405	6.31459	-9.47847	5.37878e-06	4.419e-05	3.92031
ENSMUSG00000033732	Sf3b3	101943	splicing factor 3b, subunit 3	-0.431774	9.16248	-9.47749	5.3834e-06	4.42043e-05	3.57129
ENSMUSG00000044134	Fam109a	231717	family with sequence similarity 109, member A	-0.856623	5.51656	-9.47107	5.4137e-06	4.44294e-05	4.05632
ENSMUSG00000014426	Map3k4	26407	mitogen-activated protein kinase kinase kinase 4	-0.59889	6.55636	-9.46844	5.4262e-06	4.45082e-05	3.87542
ENSMUSG00000040710	St8sia4	20452	ST8 alpha-N-acetyl-neuraminide alpha-2,8-sialyltransferase 4	-2.30842	1.38174	-9.4664	5.43591e-06	4.45165e-05	4.63138
ENSMUSG00000005410	Mcm5	17218	minichromosome maintenance complex component 5	-0.459326	8.83529	-9.46643	5.43574e-06	4.45165e-05	3.59935
ENSMUSG00000047409	Ctdspl	69274	CTD (carboxy-terminal domain, RNA polymerase II, polypeptide A) small phosphatase-like	0.948997	4.82311	9.46754	5.43046e-06	4.45165e-05	4.1869
ENSMUSG00000024757	Slc22a19	207151	solute carrier family 22 (organic anion transporter), member 19	3.88288	-0.109709	9.46183	5.45768e-06	4.4671e-05	4.40781
ENSMUSG00000030403	Vasp	22323	vasodilator-stimulated phosphoprotein	0.964809	6.14585	9.45928	5.46989e-06	4.47471e-05	3.93111
ENSMUSG00000091423	Gm17509	NA	predicted gene, 17509	-5.99932	-2.13887	-9.45704	5.48065e-06	4.48112e-05	3.90366
ENSMUSG00000029860	Zyx	22793	zyxin	-0.695515	6.27743	-9.45485	5.49119e-06	4.48735e-05	3.90497
ENSMUSG00000013150	Gfod2	70575	glucose-fructose oxidoreductase domain containing 2	-0.889128	5.33826	-9.45092	5.51013e-06	4.50043e-05	4.07233
ENSMUSG00000027333	Smox	228608	spermine oxidase	-0.683645	6.27854	-9.44925	5.51822e-06	4.50464e-05	3.89904
ENSMUSG00000029569	Tmem168	101118	transmembrane protein 168	0.64513	7.01644	9.4477	5.52571e-06	4.50596e-05	3.79392
ENSMUSG00000085419	Gm11734	NA	predicted gene 11734	4.05786	-0.737196	9.44827	5.52299e-06	4.50596e-05	4.21478
ENSMUSG00000037747	Phyhipl	70911	phytanoyl-CoA hydroxylase interacting protein-like	-1.97844	1.29293	-9.44601	5.53393e-06	4.51027e-05	4.61396
ENSMUSG00000040648	Ppip5k2	227399	diphosphoinositol pentakisphosphate kinase 2	-0.53367	7.60529	-9.44411	5.54315e-06	4.51539e-05	3.71956
ENSMUSG00000022960	Donson	60364	downstream neighbor of SON	-0.746361	5.52413	-9.44303	5.5484e-06	4.51693e-05	4.02482
ENSMUSG00000022508	Bcl6	12053	B cell leukemia/lymphoma 6	2.58912	1.30065	9.44252	5.55093e-06	4.51693e-05	4.60951
ENSMUSG00000066191	Anks6	75691	ankyrin repeat and sterile alpha motif domain containing 6	2.22257	2.14881	9.44115	5.55757e-06	4.51821e-05	4.58569
ENSMUSG00000027377	Mall	228576	mal, T cell differentiation protein-like	2.95346	0.519053	9.44098	5.55839e-06	4.51821e-05	4.54872
ENSMUSG00000084989	Crocc2	381284	ciliary rootlet coiled-coil, rootletin family member 2	4.28926	0.708118	9.43568	5.58432e-06	4.53689e-05	4.51152
ENSMUSG00000005267	Zfp287	170740	zinc finger protein 287	-1.76068	3.00596	-9.43334	5.59584e-06	4.54385e-05	4.4882
ENSMUSG00000050777	Tmem37	170706	transmembrane protein 37	1.97051	2.85991	9.43092	5.60776e-06	4.55112e-05	4.50404
ENSMUSG00000002835	Chaf1a	27221	chromatin assembly factor 1, subunit A (p150)	-0.761315	7.2113	-9.42916	5.61644e-06	4.55575e-05	3.75464
ENSMUSG00000021879	Dnah12	NA	dynein, axonemal, heavy chain 12	6.54116	-2.05569	9.42676	5.6283e-06	4.56296e-05	3.90098
ENSMUSG00000003865	Gys1	14936	glycogen synthase 1, muscle	0.580585	6.61612	9.42435	5.6402e-06	4.5702e-05	3.82274
ENSMUSG00000022856	Tmem41a	66664	transmembrane protein 41a	-0.904802	4.6157	-9.42314	5.6462e-06	4.57265e-05	4.19152
ENSMUSG00000031403	Dkc1	245474	dyskeratosis congenita 1, dyskerin	-0.644243	7.68628	-9.42077	5.658e-06	4.57737e-05	3.68849
ENSMUSG00000045954	Sdpr	20324	serum deprivation response	3.86651	3.68496	9.4212	5.65587e-06	4.57737e-05	4.45819
ENSMUSG00000006445	Epha2	13836	Eph receptor A2	1.03452	4.87048	9.41824	5.6706e-06	4.58516e-05	4.13284
ENSMUSG00000039004	Bmp6	12161	bone morphogenetic protein 6	-3.3634	-0.130744	-9.41315	5.69603e-06	4.60329e-05	4.38902
ENSMUSG00000022864	D16Ertd472e	67102	DNA segment, Chr 16, ERATO Doi 472, expressed	-1.35271	4.31262	-9.41022	5.71073e-06	4.61275e-05	4.25253
ENSMUSG00000031391	L1cam	16728	L1 cell adhesion molecule	4.45688	2.43654	9.40249	5.74972e-06	4.6418e-05	4.5717
ENSMUSG00000079018	Ly6c1	17067	lymphocyte antigen 6 complex, locus C1	2.42535	2.42106	9.40096	5.75749e-06	4.64563e-05	4.53344
ENSMUSG00000022463	Srebf2	20788	sterol regulatory element binding factor 2	-0.79418	7.32464	-9.39613	5.78206e-06	4.663e-05	3.70944
ENSMUSG00000069733	Ube2u	381534	ubiquitin-conjugating enzyme E2U (putative)	-3.76376	-0.2838	-9.39361	5.79489e-06	4.66787e-05	4.31013
ENSMUSG00000057335	Cep170	545389	centrosomal protein 170	-1.64156	4.70002	-9.39322	5.7969e-06	4.66787e-05	4.17539
ENSMUSG00000042328	Hps4	192232	HPS4, biogenesis of lysosomal organelles complex 3 subunit 2	-0.746728	5.0562	-9.39256	5.80026e-06	4.66787e-05	4.06886
ENSMUSG00000028536	2610528J11Rik	66451	RIKEN cDNA 2610528J11 gene	1.23016	3.59523	9.39266	5.79978e-06	4.66787e-05	4.35185
ENSMUSG00000026442	Nfasc	269116	neurofascin	-4.05168	0.763439	-9.39045	5.81108e-06	4.67413e-05	4.48433
ENSMUSG00000027314	Dll4	54485	delta-like 4 (Drosophila)	-1.47576	3.90624	-9.38271	5.85086e-06	4.69874e-05	4.30221
ENSMUSG00000028587	Orc1	18392	origin recognition complex, subunit 1	-0.7869	5.05511	-9.3836	5.84629e-06	4.69874e-05	4.06158
ENSMUSG00000029373	Pf4	56744	platelet factor 4	6.78238	-1.25263	9.38317	5.84853e-06	4.69874e-05	3.91634
ENSMUSG00000059208	Hnrnpm	76936	heterogeneous nuclear ribonucleoprotein M	-0.440579	9.47613	-9.38014	5.86419e-06	4.70698e-05	3.44
ENSMUSG00000036596	Cpz	242939	carboxypeptidase Z	-5.2241	-0.149556	-9.3789	5.87061e-06	4.70967e-05	4.19697
ENSMUSG00000005204	Senp3	80886	SUMO/sentrin specific peptidase 3	-0.677173	6.4518	-9.37724	5.87921e-06	4.71411e-05	3.80415
ENSMUSG00000034285	Nipsnap1	18082	nipsnap homolog 1 (C. elegans)	-0.581852	6.79306	-9.37338	5.89926e-06	4.72772e-05	3.75218
ENSMUSG00000034902	Pip5k1c	18717	phosphatidylinositol-4-phosphate 5-kinase, type 1 gamma	-0.568127	7.05947	-9.37188	5.90707e-06	4.73151e-05	3.71661
ENSMUSG00000050390	C77080	97130	expressed sequence C77080	1.32315	4.49005	9.3698	5.91794e-06	4.73774e-05	4.1724
ENSMUSG00000079396	Gm3411	100861615	predicted gene 3411	-3.53457	-0.314782	-9.36835	5.92553e-06	4.74135e-05	4.30114
ENSMUSG00000053819	Camk2d	108058	calcium/calmodulin-dependent protein kinase II, delta	0.745444	6.60039	9.36735	5.93077e-06	4.74307e-05	3.77171
ENSMUSG00000040562	Gstm2	14863	glutathione S-transferase, mu 2	1.00893	5.22981	9.36407	5.948e-06	4.75438e-05	4.00863
ENSMUSG00000030134	Rasgef1a	70727	RasGEF domain family, member 1A	2.33884	2.02127	9.36284	5.95444e-06	4.75704e-05	4.52545
ENSMUSG00000099083	Atf7	223922	activating transcription factor 7	0.877847	5.37	9.3565	5.98795e-06	4.78133e-05	3.96969
ENSMUSG00000020773	Trim47	217333	tripartite motif-containing 47	3.57193	-0.323023	9.35518	5.99492e-06	4.78441e-05	4.30278
ENSMUSG00000063646	Jakmip1	76071	janus kinase and microtubule interacting protein 1	-4.69098	-0.0425657	-9.35258	6.00871e-06	4.79043e-05	4.25595
ENSMUSG00000014837	4931428F04Rik	74356	RIKEN cDNA 4931428F04 gene	-1.03507	4.23337	-9.35297	6.00665e-06	4.79043e-05	4.20366
ENSMUSG00000043909	Trp53bp1	27223	transformation related protein 53 binding protein 1	-0.603656	7.3368	-9.34742	6.03622e-06	4.80987e-05	3.65918
ENSMUSG00000024424	Ttc39c	72747	tetratricopeptide repeat domain 39C	-1.11336	3.5908	-9.34474	6.05054e-06	4.81878e-05	4.30929
ENSMUSG00000061689	Dlgap4	228836	discs, large homolog-associated protein 4 (Drosophila)	-0.682091	6.34807	-9.3422	6.06419e-06	4.82714e-05	3.786
ENSMUSG00000023964	Calcr	12311	calcitonin receptor	-2.98128	0.122136	-9.3376	6.08895e-06	4.84434e-05	4.40083
ENSMUSG00000021975	Ints9	210925	integrator complex subunit 9	-0.700844	6.24989	-9.33374	6.10978e-06	4.8584e-05	3.79305
ENSMUSG00000026828	Galnt5	241391	UDP-N-acetyl-alpha-D-galactosamine:polypeptide N-acetylgalactosaminyltransferase 5	3.31065	1.19815	9.32631	6.15017e-06	4.88798e-05	4.50001
ENSMUSG00000006519	Cyba	13057	cytochrome b-245, alpha polypeptide	0.700923	6.12115	9.32395	6.16307e-06	4.89571e-05	3.79968
ENSMUSG00000020918	Kat2a	14534	K(lysine) acetyltransferase 2A	-0.766675	6.84121	-9.32239	6.17157e-06	4.89992e-05	3.69871
ENSMUSG00000024743	Syt7	54525	synaptotagmin VII	-2.45459	3.87349	-9.31746	6.19864e-06	4.91686e-05	4.2818
ENSMUSG00000038352	Arl5c	217151	ADP-ribosylation factor-like 5C	-1.66613	2.45458	-9.31734	6.19931e-06	4.91686e-05	4.44254
ENSMUSG00000047878	A4galt	239559	alpha 1,4-galactosyltransferase	-7.8019	-0.0337197	-9.31245	6.22625e-06	4.93568e-05	3.91357
ENSMUSG00000041907	Gpr45	93690	G protein-coupled receptor 45	-3.32564	0.313876	-9.3108	6.23541e-06	4.93784e-05	4.39318
ENSMUSG00000028745	Capzb	12345	capping protein (actin filament) muscle Z-line, beta	0.461036	8.36621	9.31133	6.23248e-06	4.93784e-05	3.50315
ENSMUSG00000066026	Dhrs3	20148	dehydrogenase/reductase (SDR family) member 3	1.2427	4.75677	9.30972	6.2414e-06	4.94004e-05	4.05954
ENSMUSG00000026036	Nif3l1	65102	Ngg1 interacting factor 3-like 1 (S. pombe)	-0.634161	6.55295	-9.3084	6.24871e-06	4.94328e-05	3.72255
ENSMUSG00000048696	Mex3d	237400	mex3 RNA binding family member D	-1.27195	3.67493	-9.30666	6.25835e-06	4.94736e-05	4.26354
ENSMUSG00000089929	Bcl2a1b	12045	B cell leukemia/lymphoma 2 related protein A1b	4.15312	-1.01507	9.30631	6.26031e-06	4.94736e-05	4.01639
ENSMUSG00000056537	Rlim	19820	ring finger protein, LIM domain interacting	0.866405	7.67865	9.30378	6.2744e-06	4.95593e-05	3.57652
ENSMUSG00000021868	Ppif	105675	peptidylprolyl isomerase F (cyclophilin F)	-0.685007	6.13648	-9.30284	6.27962e-06	4.95751e-05	3.78058
ENSMUSG00000108348	Gm42372	105247240	predicted gene, 42372	-3.63231	0.0299932	-9.30064	6.29192e-06	4.96318e-05	4.31849
ENSMUSG00000034227	Foxj1	15223	forkhead box J1	3.85904	2.34229	9.29982	6.2965e-06	4.96318e-05	4.47671
ENSMUSG00000085483	Gm14198	NA	predicted gene 14198	5.32023	-2.60753	9.30028	6.29397e-06	4.96318e-05	3.73487
ENSMUSG00000033715	Akr1c14	105387	aldo-keto reductase family 1, member C14	6.01549	0.24937	9.29602	6.3178e-06	4.97741e-05	4.17985
ENSMUSG00000032816	Igdcc4	56741	immunoglobulin superfamily, DCC subclass, member 4	-1.95109	3.7345	-9.28737	6.36662e-06	5.01331e-05	4.25535
ENSMUSG00000000538	Tom1l2	216810	target of myb1-like 2 (chicken)	0.622396	6.02866	9.28358	6.38814e-06	5.02768e-05	3.77404
ENSMUSG00000020961	Ston2	108800	stonin 2	-0.884351	4.54458	-9.28255	6.39396e-06	5.02968e-05	4.07143
ENSMUSG00000070526	Peg12	27412	paternally expressed 12	-1.72188	4.12736	-9.27759	6.4223e-06	5.04938e-05	4.17353
ENSMUSG00000022900	Ildr1	106347	immunoglobulin-like domain containing receptor 1	0.983935	4.35598	9.27011	6.46521e-06	5.08052e-05	4.09444
ENSMUSG00000026274	Pask	269224	PAS domain containing serine/threonine kinase	-0.621155	6.1055	-9.2651	6.49416e-06	5.10066e-05	3.74773
ENSMUSG00000015749	Anp32e	66471	acidic (leucine-rich) nuclear phosphoprotein 32 family, member E	-0.457866	8.46506	-9.26378	6.50182e-06	5.10406e-05	3.44612
ENSMUSG00000025196	Cpn1	93721	carboxypeptidase N, polypeptide 1	-1.13986	4.73988	-9.26124	6.51653e-06	5.11299e-05	4.01953
ENSMUSG00000018819	Lsp1	16985	lymphocyte specific 1	-1.96158	1.30578	-9.25904	6.52939e-06	5.12047e-05	4.45263
ENSMUSG00000029408	Abcb9	56325	ATP-binding cassette, sub-family B (MDR/TAP), member 9	3.03688	1.61386	9.25831	6.53361e-06	5.12116e-05	4.45188
ENSMUSG00000028463	Car9	230099	carbonic anhydrase 9	2.75002	0.618884	9.25635	6.54507e-06	5.12753e-05	4.41345
ENSMUSG00000042097	Zfp239	22685	zinc finger protein 239	-0.926374	4.60441	-9.25408	6.55834e-06	5.1353e-05	4.03306
ENSMUSG00000046865	Fbl	14113	fibrillarin	-0.571495	6.93587	-9.25337	6.56248e-06	5.13592e-05	3.6175
ENSMUSG00000031148	Gpkow	209416	G patch domain and KOW motifs	0.531272	7.05111	9.25257	6.56714e-06	5.13695e-05	3.60056
ENSMUSG00000000958	Slc7a7	20540	solute carrier family 7 (cationic amino acid transporter, y+ system), member 7	1.93782	3.61119	9.24851	6.59103e-06	5.15302e-05	4.22976
ENSMUSG00000090626	Tex9	21778	testis expressed gene 9	-0.88262	4.81113	-9.24652	6.60274e-06	5.15692e-05	3.98254
ENSMUSG00000030587	2200002D01Rik	72275	RIKEN cDNA 2200002D01 gene	1.20896	3.08816	9.24673	6.60147e-06	5.15692e-05	4.28982
ENSMUSG00000039286	Fndc3b	72007	fibronectin type III domain containing 3B	0.55451	6.95513	9.24552	6.60863e-06	5.15703e-05	3.60591
ENSMUSG00000040364	Sec1	56546	secretory blood group 1	4.16753	-0.64528	9.24536	6.60959e-06	5.15703e-05	4.0881
ENSMUSG00000015357	Clpx	270166	caseinolytic mitochondrial matrix peptidase chaperone subunit	0.526644	6.45129	9.24252	6.62634e-06	5.16747e-05	3.66922
ENSMUSG00000104963	Gm42974	NA	predicted gene 42974	-5.2868	-2.19562	-9.23363	6.67922e-06	5.19713e-05	3.73489
ENSMUSG00000063506	Arhgap22	239027	Rho GTPase activating protein 22	-2.01497	3.14536	-9.23272	6.68469e-06	5.19713e-05	4.29125
ENSMUSG00000026193	Fn1	14268	fibronectin 1	-1.80827	7.95685	-9.23289	6.68366e-06	5.19713e-05	3.48916
ENSMUSG00000027932	Slc27a3	26568	solute carrier family 27 (fatty acid transporter), member 3	-1.16198	5.06448	-9.23507	6.67065e-06	5.19713e-05	3.92994
ENSMUSG00000079547	H2-DMb1	14999	histocompatibility 2, class II, locus Mb1	2.69439	1.25626	9.23288	6.68373e-06	5.19713e-05	4.42797
ENSMUSG00000069917	Hba-a2	110257	hemoglobin alpha, adult chain 2	7.5479	0.57781	9.23487	6.67181e-06	5.19713e-05	4.02627
ENSMUSG00000022240	Ctnnd2	18163	catenin (cadherin associated protein), delta 2	0.871083	6.55674	9.23163	6.69119e-06	5.19955e-05	3.64798
ENSMUSG00000027876	Reg4	67709	regenerating islet-derived family, member 4	-5.5473	-2.34951	-9.22917	6.70592e-06	5.20306e-05	3.7303
ENSMUSG00000058922	Gm10052	NA	predicted pseudogene 10052	-0.790395	5.05541	-9.22978	6.70224e-06	5.20306e-05	3.91389
ENSMUSG00000023938	Aars2	224805	alanyl-tRNA synthetase 2, mitochondrial	-0.619497	5.7507	-9.22861	6.70925e-06	5.20306e-05	3.77279
ENSMUSG00000030048	Gkn3	68888	gastrokine 3	1.89887	2.84622	9.22874	6.70852e-06	5.20306e-05	4.31794
ENSMUSG00000026342	Slc35f5	74150	solute carrier family 35, member F5	0.756881	6.00738	9.22597	6.72513e-06	5.21274e-05	3.72419
ENSMUSG00000054693	Adam10	11487	a disintegrin and metallopeptidase domain 10	0.549982	7.90211	9.22525	6.72946e-06	5.21346e-05	3.47206
ENSMUSG00000026174	Cnot9	58184	CCR4-NOT transcription complex, subunit 9	-0.549175	7.25839	-9.22274	6.74459e-06	5.21992e-05	3.54717
ENSMUSG00000022139	Mbnl2	105559	muscleblind-like 2	0.666281	6.82909	9.2228	6.74425e-06	5.21992e-05	3.6006
ENSMUSG00000033545	Znrf1	170737	zinc and ring finger 1	-0.747614	6.09536	-9.21972	6.76286e-06	5.23142e-05	3.70817
ENSMUSG00000024302	Dtna	13527	dystrobrevin alpha	-1.16895	5.16183	-9.21588	6.78613e-06	5.24678e-05	3.89294
ENSMUSG00000027395	Polr1b	20017	polymerase (RNA) I polypeptide B	-0.818556	6.6133	-9.21318	6.80258e-06	5.25685e-05	3.62459
ENSMUSG00000029547	Ints1	68510	integrator complex subunit 1	-0.729842	6.79082	-9.20845	6.83146e-06	5.27651e-05	3.59426
ENSMUSG00000009647	Mcu	215999	mitochondrial calcium uniporter	1.11336	5.21502	9.20384	6.85978e-06	5.29572e-05	3.86013
ENSMUSG00000033214	Slitrk5	75409	SLIT and NTRK-like family, member 5	-6.1654	-2.8899	-9.18789	6.95861e-06	5.36622e-05	3.6853
ENSMUSG00000033767	D930015E06Rik	229473	RIKEN cDNA D930015E06 gene	-1.02928	7.01415	-9.18742	6.96158e-06	5.36622e-05	3.54858
ENSMUSG00000063628	Gm7665	NA	predicted pseudogene 7665	1.74709	1.80969	9.18813	6.95714e-06	5.36622e-05	4.37297
ENSMUSG00000021929	Kpna3	16648	karyopherin (importin) alpha 3	-0.631311	7.41568	-9.18196	6.99579e-06	5.38988e-05	3.48883
ENSMUSG00000078926	Cdc20b	238896	cell division cycle 20B	5.78344	-0.0538003	9.18111	7.00109e-06	5.39126e-05	4.03879
ENSMUSG00000027078	Ube2l6	56791	ubiquitin-conjugating enzyme E2L 6	1.42544	3.90173	9.18024	7.0066e-06	5.3928e-05	4.10391
ENSMUSG00000027931	Npr1	18160	natriuretic peptide receptor 1	2.80234	1.15522	9.17897	7.01459e-06	5.39624e-05	4.37827
ENSMUSG00000033781	Asb13	142688	ankyrin repeat and SOCS box-containing 13	-0.773592	5.49642	-9.17551	7.03643e-06	5.40569e-05	3.77304
ENSMUSG00000041438	Utp4	21771	UTP4 small subunit processome component	-0.598603	6.92567	-9.17607	7.03288e-06	5.40569e-05	3.54355
[truncated: 7,129 more rows]
