# Supplementary material for: PI3K signaling specifies proximal-distal fate by driving a developmental gene regulatory network in SOX9+ mouse lung progenitors
Source: eLife. 2022 Aug 17;11:e67954. doi: 10.7554/eLife.67954 (PMC9427112; doi:10.7554/eLife.67954)
Supplement: Supplementary file 2. [file elife-67954-supp2.xlsx]

## Sheet: Sheet1
Supplemental File 2. Annotated E11.5 ATAC-Seq Peaks
PeakID	Chr	Start	End	Strand	Peak Score	Focus Ratio/Region Size	Annotation	Detailed Annotation	Distance to TSS	Nearest PromoterID	Entrez ID	Nearest Unigene	Nearest Refseq	Nearest Ensembl	Gene Name	Gene Alias	Gene Description	Gene Type
Sox9_E11_Sample1_peak_269	chr1	3670777	3672555	+	501	NA	promoter-TSS (ENSMUST00000070533.4)	protein_coding-promoter-TSS (ENSMUST00000070533.4)	-168	ENSMUST00000070533.4	ENSMUSG00000051951	ENSMUST00000070533			Xkr4			protein_coding
Sox9_E11_Sample1_peak_270	chr1	3913359	3914205	+	44	NA	intron (ENSMUST00000194643.1, intron 2 of 2)	lncRNA-intron (ENSMUST00000194643.1, intron 2 of 2)	72202	ENSMUST00000192427.1	ENSMUSG00000102343	ENSMUST00000194643			Gm37381			lncRNA
Sox9_E11_Sample1_peak_271	chr1	3955810	3956474	+	39	NA	intron (ENSMUST00000194643.1, intron 2 of 2)	lncRNA-intron (ENSMUST00000194643.1, intron 2 of 2)	29842	ENSMUST00000192427.1	ENSMUSG00000102343	ENSMUST00000194643			Gm37381			lncRNA
Sox9_E11_Sample1_peak_272	chr1	4256958	4258596	+	92	NA	intron (ENSMUST00000195384.1, intron 1 of 1)	processed_pseudogene-intron (ENSMUST00000195384.1, intron 1 of 1)	2742	ENSMUST00000195384.1	ENSMUSG00000102948	ENSMUST00000195384			Gm6101			processed_pseudogene
Sox9_E11_Sample1_peak_274	chr1	4491827	4493593	+	119	NA	exon (ENSMUST00000192505.1, exon 1 of 1)	protein_coding-exon (ENSMUST00000192505.1, exon 1 of 1)	894	ENSMUST00000192505.1	ENSMUSG00000025902	ENSMUST00000192505			Sox17			protein_coding
Sox9_E11_Sample1_peak_275	chr1	4497014	4497637	+	50	NA	promoter-TSS (ENSMUST00000027035.9)	protein_coding-promoter-TSS (ENSMUST00000027035.9)	29	ENSMUST00000192650.5	ENSMUSG00000025902	ENSMUST00000192505			Sox17			protein_coding
Sox9_E11_Sample1_peak_277	chr1	4571293	4572306	+	460	NA	Intergenic	Intergenic	14453	ENSMUST00000195771.1	ENSMUSG00000104328	ENSMUST00000195771			Gm37323			lncRNA
Sox9_E11_Sample1_peak_278	chr1	4644680	4645261	+	122	NA	Intergenic	Intergenic	34499	ENSMUST00000192738.1	ENSMUSG00000102735	ENSMUST00000192738			Gm7369			processed_pseudogene
Sox9_E11_Sample1_peak_282	chr1	4785097	4786238	+	313	NA	promoter-TSS (ENSMUST00000045689.13)	protein_coding-promoter-TSS (ENSMUST00000045689.13)	25	ENSMUST00000132625.1	ENSMUSG00000033845	ENSMUST00000130201			Mrpl15			protein_coding
Sox9_E11_Sample1_peak_283	chr1	4807449	4808730	+	534	NA	promoter-TSS (ENSMUST00000131119.1)	protein_coding-promoter-TSS (ENSMUST00000131119.1)	-148	ENSMUST00000131119.1	ENSMUSG00000025903	ENSMUST00000134384			Lypla1			protein_coding
Sox9_E11_Sample1_peak_284	chr1	4857134	4858596	+	529	NA	promoter-TSS (ENSMUST00000081551.13)	protein_coding-promoter-TSS (ENSMUST00000081551.13)	51	ENSMUST00000081551.13	ENSMUSG00000033813	ENSMUST00000081551			Tcea1			protein_coding
Sox9_E11_Sample1_peak_285	chr1	5018292	5020445	+	168	NA	promoter-TSS (ENSMUST00000119256.7)	protein_coding-promoter-TSS (ENSMUST00000119256.7)	11	ENSMUST00000156289.1	ENSMUSG00000002459	ENSMUST00000156289			Rgs20			protein_coding
Sox9_E11_Sample1_peak_286	chr1	5072377	5073009	+	85	NA	intron (ENSMUST00000192847.5, intron 1 of 12)	protein_coding-intron (ENSMUST00000192847.5, intron 1 of 12)	-2408	ENSMUST00000118000.7	ENSMUSG00000002459	ENSMUST00000156289			Rgs20			protein_coding
Sox9_E11_Sample1_peak_287	chr1	5082839	5083598	+	374	NA	promoter-TSS (ENSMUST00000192029.5)	protein_coding-promoter-TSS (ENSMUST00000192029.5)	54	ENSMUST00000192142.1	ENSMUSG00000033793	ENSMUST00000192142			Atp6v1h			protein_coding
Sox9_E11_Sample1_peak_288	chr1	5109698	5112642	+	1571	NA	intron (ENSMUST00000192847.5, intron 7 of 12)	protein_coding-intron (ENSMUST00000044369.12, intron 7 of 13)	28006	ENSMUST00000192142.1	ENSMUSG00000033793	ENSMUST00000192142			Atp6v1h			protein_coding
Sox9_E11_Sample1_peak_289	chr1	5504674	5505396	+	104	NA	Intergenic	Intergenic	-83431	ENSMUST00000192685.1	ENSMUSG00000025905	ENSMUST00000159083			Oprk1			protein_coding
Sox9_E11_Sample1_peak_290	chr1	5588135	5589112	+	380	NA	promoter-TSS (ENSMUST00000027038.10)	protein_coding-promoter-TSS (ENSMUST00000027038.10)	66	ENSMUST00000027038.10	ENSMUSG00000025905	ENSMUST00000159083			Oprk1			protein_coding
Sox9_E11_Sample1_peak_291	chr1	5915555	5917942	+	199	NA	exon (ENSMUST00000044180.4, exon 1 of 1)	protein_coding-exon (ENSMUST00000044180.4, exon 1 of 1)	650	ENSMUST00000044180.4	ENSMUSG00000033774	ENSMUST00000044180			Npbwr1			protein_coding
Sox9_E11_Sample1_peak_292	chr1	6076561	6077115	+	97	NA	Intergenic	Intergenic	-26793	ENSMUST00000191956.1	ENSMUSG00000103090	ENSMUST00000191956			Gm19214			processed_pseudogene
Sox9_E11_Sample1_peak_293	chr1	6214105	6215454	+	580	NA	promoter-TSS (ENSMUST00000159618.1)	lncRNA-promoter-TSS (ENSMUST00000159618.1)	116	ENSMUST00000162210.7	ENSMUSG00000025907	ENSMUST00000162795			Rb1cc1			protein_coding
Sox9_E11_Sample1_peak_295	chr1	6282454	6283000	+	61	NA	Intergenic	Intergenic	12049	ENSMUST00000159656.1	ENSMUSG00000025907	ENSMUST00000162795			Rb1cc1			protein_coding
Sox9_E11_Sample1_peak_296	chr1	6287025	6287463	+	53	NA	Intergenic	Intergenic	16566	ENSMUST00000159656.1	ENSMUSG00000025907	ENSMUST00000162795			Rb1cc1			protein_coding
Sox9_E11_Sample1_peak_297	chr1	6358783	6359908	+	274	NA	exon (ENSMUST00000133144.3, exon 1 of 5)	protein_coding-exon (ENSMUST00000133144.3, exon 1 of 5)	127	ENSMUST00000133144.3	ENSMUSG00000087247	ENSMUST00000133144			Alkal1			protein_coding
Sox9_E11_Sample1_peak_298	chr1	6382619	6383592	+	401	NA	promoter-TSS (ENSMUST00000192950.1)	processed_pseudogene-promoter-TSS (ENSMUST00000192950.1)	1	ENSMUST00000192950.1	ENSMUSG00000102706	ENSMUST00000192950			Gm7417			processed_pseudogene
Sox9_E11_Sample1_peak_299	chr1	6406270	6406778	+	39	NA	Intergenic	Intergenic	-23418	ENSMUST00000192950.1	ENSMUSG00000102706	ENSMUST00000192950			Gm7417			processed_pseudogene
Sox9_E11_Sample1_peak_300	chr1	6441053	6441871	+	270	NA	promoter-TSS (ENSMUST00000194240.1)	processed_pseudogene-promoter-TSS (ENSMUST00000194240.1)	-166	ENSMUST00000194240.1	ENSMUSG00000103845	ENSMUST00000194240			Gm19026			processed_pseudogene
Sox9_E11_Sample1_peak_301	chr1	6668478	6668955	+	62	NA	intron (ENSMUST00000131494.7, intron 2 of 22)	protein_coding-intron (ENSMUST00000131494.7, intron 2 of 22)	-61335	ENSMUST00000043578.12	ENSMUSG00000033740	ENSMUST00000132207			St18			protein_coding
Sox9_E11_Sample1_peak_302	chr1	6751008	6751607	+	93	NA	intron (ENSMUST00000163727.3, intron 1 of 21)	protein_coding-intron (ENSMUST00000140079.7, intron 3 of 23)	13732	ENSMUST00000163727.3	ENSMUSG00000033740	ENSMUST00000132207			St18			protein_coding
Sox9_E11_Sample1_peak_303	chr1	6936880	6937618	+	92	NA	Intergenic	Intergenic	7490	ENSMUST00000191703.1	ENSMUSG00000103282	ENSMUST00000191703			Gm37275			processed_pseudogene
Sox9_E11_Sample1_peak_304	chr1	6973839	6974400	+	45	NA	Intergenic	Intergenic	-24098	ENSMUST00000193423.1	ENSMUSG00000102534	ENSMUST00000193423			Gm37225			processed_pseudogene
Sox9_E11_Sample1_peak_305	chr1	7088237	7089827	+	695	NA	promoter-TSS (ENSMUST00000182306.1)	protein_coding-promoter-TSS (ENSMUST00000182306.1)	-72	ENSMUST00000182306.1	ENSMUSG00000051285	ENSMUST00000182675			Pcmtd1			protein_coding
Sox9_E11_Sample1_peak_306	chr1	7206056	7207052	+	332	NA	Intergenic	Intergenic	-16635	ENSMUST00000195269.1	ENSMUSG00000103709	ENSMUST00000195269			Nras-ps2			processed_pseudogene
Sox9_E11_Sample1_peak_307	chr1	7397213	7398657	+	633	NA	promoter-TSS (ENSMUST00000181554.1)	lncRNA-promoter-TSS (ENSMUST00000181554.1)	-66	ENSMUST00000193732.1	ENSMUSG00000097797	ENSMUST00000193428			Gm26901			lncRNA
Sox9_E11_Sample1_peak_309	chr1	7498613	7499543	+	138	NA	intron (ENSMUST00000194886.1, intron 1 of 2)	lncRNA-intron (ENSMUST00000194886.1, intron 1 of 2)	1110	ENSMUST00000194886.1	ENSMUSG00000103067	ENSMUST00000194886			Gm30414			lncRNA
Sox9_E11_Sample1_peak_310	chr1	7776890	7778305	+	221	NA	Intergenic	Intergenic	-47032	ENSMUST00000194872.1	ENSMUSG00000103557	ENSMUST00000194872			Gm38216			processed_pseudogene
Sox9_E11_Sample1_peak_314	chr1	9298519	9299892	+	180	NA	promoter-TSS (ENSMUST00000126083.1)	protein_coding-promoter-TSS (ENSMUST00000126083.1)	33	ENSMUST00000140295.7	ENSMUSG00000025909	ENSMUST00000115484			Sntg1			protein_coding
Sox9_E11_Sample1_peak_315	chr1	9469437	9470116	+	118	NA	Intergenic	Intergenic	11106	ENSMUST00000083691.1	ENSMUSG00000065625	ENSMUST00000083691			Gm24765			snRNA
Sox9_E11_Sample1_peak_317	chr1	9535534	9536202	+	46	NA	Intergenic	Intergenic	-9540	ENSMUST00000072079.8	ENSMUSG00000061024	ENSMUST00000072079			Rrs1			protein_coding
Sox9_E11_Sample1_peak_318	chr1	9544953	9546432	+	610	NA	exon (ENSMUST00000072079.8, exon 1 of 1)	protein_coding-exon (ENSMUST00000072079.8, exon 1 of 1)	284	ENSMUST00000072079.8	ENSMUSG00000061024	ENSMUST00000072079			Rrs1			protein_coding
Sox9_E11_Sample1_peak_319	chr1	9638863	9639317	+	41	NA	TTS (ENSMUST00000191209.1)	lncRNA-TTS (ENSMUST00000191209.1)	1492	ENSMUST00000191209.1	ENSMUSG00000099827	ENSMUST00000191209			Gm29520			lncRNA
Sox9_E11_Sample1_peak_320	chr1	9699640	9701099	+	528	NA	promoter-TSS (ENSMUST00000088658.10)	protein_coding-promoter-TSS (ENSMUST00000088658.10)	-160	ENSMUST00000088658.10	ENSMUSG00000025912	ENSMUST00000160022			Mybl1			protein_coding
Sox9_E11_Sample1_peak_321	chr1	9747503	9748823	+	510	NA	promoter-TSS (ENSMUST00000189431.1)	lncRNA-promoter-TSS (ENSMUST00000189431.1)	207	ENSMUST00000181358.7	ENSMUSG00000097893	ENSMUST00000207445			1700034P13Rik			lncRNA
Sox9_E11_Sample1_peak_322	chr1	9755541	9756619	+	240	NA	intron (ENSMUST00000181821.7, intron 2 of 3)	lncRNA-intron (ENSMUST00000181358.7, intron 2 of 6)	7454	ENSMUST00000209020.1	ENSMUSG00000097893	ENSMUST00000207445			1700034P13Rik			lncRNA
Sox9_E11_Sample1_peak_323	chr1	9772926	9773576	+	174	NA	intron (ENSMUST00000181821.7, intron 2 of 3)	lncRNA-intron (ENSMUST00000181358.7, intron 2 of 6)	-10527	ENSMUST00000189322.1	ENSMUSG00000097893	ENSMUST00000207445			1700034P13Rik			lncRNA
Sox9_E11_Sample1_peak_324	chr1	9797814	9798780	+	193	NA	promoter-TSS (ENSMUST00000188298.6)	protein_coding-promoter-TSS (ENSMUST00000188298.6)	89	ENSMUST00000188298.6	ENSMUSG00000025915	ENSMUST00000188298			Sgk3			protein_coding
Sox9_E11_Sample1_peak_325	chr1	9847719	9848987	+	347	NA	promoter-TSS (ENSMUST00000097826.5)	protein_coding-promoter-TSS (ENSMUST00000097826.5)	32	ENSMUST00000188830.6	ENSMUSG00000025915	ENSMUST00000188298			Sgk3			protein_coding
Sox9_E11_Sample1_peak_327	chr1	9943120	9944511	+	384	NA	promoter-TSS (ENSMUST00000182043.7)	lncRNA-promoter-TSS (ENSMUST00000182043.7)	288	ENSMUST00000182498.7	ENSMUSG00000098234	ENSMUST00000182580			Snhg6			lncRNA
Sox9_E11_Sample1_peak_328	chr1	9967168	9968230	+	154	NA	TTS (ENSMUST00000027049.9)	protein_coding-TTS (ENSMUST00000027049.9)	233	ENSMUST00000185184.1	ENSMUSG00000099032	ENSMUST00000185184			Tcf24			protein_coding
Sox9_E11_Sample1_peak_329	chr1	10008742	10009421	+	179	NA	promoter-TSS (ENSMUST00000027049.9)	protein_coding-promoter-TSS (ENSMUST00000027049.9)	49	ENSMUST00000176398.7	ENSMUSG00000025916	ENSMUST00000130102			Ppp1r42			protein_coding
Sox9_E11_Sample1_peak_330	chr1	10037561	10040275	+	465	NA	promoter-TSS (ENSMUST00000027050.9)	protein_coding-promoter-TSS (ENSMUST00000027050.9)	656	ENSMUST00000117415.7	ENSMUSG00000056763	ENSMUST00000117415			Cspp1			protein_coding
Sox9_E11_Sample1_peak_331	chr1	10100756	10101392	+	27	NA	intron (ENSMUST00000185422.1, intron 1 of 1)	protein_coding-intron (ENSMUST00000071087.11, intron 16 of 29)	-3154	ENSMUST00000190625.1	ENSMUSG00000056763	ENSMUST00000117415			Cspp1			protein_coding
Sox9_E11_Sample1_peak_332	chr1	10231926	10233634	+	343	NA	promoter-TSS (ENSMUST00000088615.10)	protein_coding-promoter-TSS (ENSMUST00000088615.10)	-110	ENSMUST00000088615.10	ENSMUSG00000067851	ENSMUST00000142497			Arfgef1			protein_coding
Sox9_E11_Sample1_peak_333	chr1	10256787	10257680	+	161	NA	Intergenic	Intergenic	-24563	ENSMUST00000088615.10	ENSMUSG00000067851	ENSMUST00000142497			Arfgef1			protein_coding
Sox9_E11_Sample1_peak_334	chr1	10285120	10286516	+	455	NA	Intergenic	Intergenic	-53148	ENSMUST00000088615.10	ENSMUSG00000067851	ENSMUST00000142497			Arfgef1			protein_coding
Sox9_E11_Sample1_peak_335	chr1	10300278	10301264	+	232	NA	Intergenic	Intergenic	-68101	ENSMUST00000088615.10	ENSMUSG00000067851	ENSMUST00000142497			Arfgef1			protein_coding
Sox9_E11_Sample1_peak_336	chr1	10337376	10338701	+	272	NA	intron (ENSMUST00000153695.7, intron 7 of 9)	protein_coding-intron (ENSMUST00000035577.6, intron 8 of 10)	-105368	ENSMUST00000088615.10	ENSMUSG00000067851	ENSMUST00000142497			Arfgef1			protein_coding
Sox9_E11_Sample1_peak_337	chr1	10396805	10398121	+	114	NA	intron (ENSMUST00000153695.7, intron 7 of 9)	protein_coding-intron (ENSMUST00000035577.6, intron 8 of 10)	54526	ENSMUST00000194845.1	ENSMUSG00000103810	ENSMUST00000194845			Gm38005			TEC
Sox9_E11_Sample1_peak_339	chr1	10719937	10720308	+	26	NA	promoter-TSS (ENSMUST00000035577.6)	protein_coding-promoter-TSS (ENSMUST00000035577.6)	-177	ENSMUST00000035577.6	ENSMUSG00000042501	ENSMUST00000147575			Cpa6			protein_coding
Sox9_E11_Sample1_peak_340	chr1	10848907	10849730	+	79	NA	Intergenic	Intergenic	-19370	ENSMUST00000188013.1	ENSMUSG00000100648	ENSMUST00000188013			Gm28659			processed_pseudogene
Sox9_E11_Sample1_peak_341	chr1	10932329	10933367	+	131	NA	Intergenic	Intergenic	11178	ENSMUST00000157960.1	ENSMUSG00000088585	ENSMUST00000157960			Gm22963			snoRNA
Sox9_E11_Sample1_peak_342	chr1	10938896	10939429	+	53	NA	Intergenic	Intergenic	17492	ENSMUST00000157960.1	ENSMUSG00000088585	ENSMUST00000157960			Gm22963			snoRNA
Sox9_E11_Sample1_peak_343	chr1	10993274	10994664	+	300	NA	exon (ENSMUST00000190935.1, exon 1 of 1)	protein_coding-exon (ENSMUST00000190935.1, exon 1 of 1)	451	ENSMUST00000190935.1	ENSMUSG00000048960	ENSMUST00000187694			Prex2			protein_coding
Sox9_E11_Sample1_peak_345	chr1	11329398	11330469	+	128	NA	Intergenic	Intergenic	37031	ENSMUST00000193623.1	ENSMUSG00000103494	ENSMUST00000193623			Gm37410			TEC
Sox9_E11_Sample1_peak_346	chr1	11340290	11341088	+	146	NA	Intergenic	Intergenic	26275	ENSMUST00000193623.1	ENSMUSG00000103494	ENSMUST00000193623			Gm37410			TEC
Sox9_E11_Sample1_peak_347	chr1	11413581	11414916	+	340	NA	promoter-TSS (ENSMUST00000135014.7)	protein_coding-promoter-TSS (ENSMUST00000135014.7)	-21	ENSMUST00000135014.7	ENSMUSG00000057715	ENSMUST00000135014			A830018L16Rik			protein_coding
Sox9_E11_Sample1_peak_348	chr1	11595357	11596025	+	100	NA	intron (ENSMUST00000191437.1, intron 2 of 2)	protein_coding-intron (ENSMUST00000048613.13, intron 6 of 13)	12709	ENSMUST00000188880.1	ENSMUSG00000099845	ENSMUST00000188880			Gm29273			processed_pseudogene
Sox9_E11_Sample1_peak_349	chr1	11624232	11624807	+	207	NA	intron (ENSMUST00000179089.7, intron 7 of 12)	protein_coding-intron (ENSMUST00000141512.7, intron 7 of 10)	-16119	ENSMUST00000188880.1	ENSMUSG00000099845	ENSMUST00000188880			Gm29273			processed_pseudogene
Sox9_E11_Sample1_peak_350	chr1	11983142	11984112	+	43	NA	Intergenic	Intergenic	-137333	ENSMUST00000187748.1	ENSMUSG00000101610	ENSMUST00000187748			Gm7560			processed_pseudogene
Sox9_E11_Sample1_peak_351	chr1	12287695	12288787	+	44	NA	Intergenic	Intergenic	-86695	ENSMUST00000179834.1	ENSMUSG00000093864	ENSMUST00000179834			Gm22633			snRNA
Sox9_E11_Sample1_peak_352	chr1	12397952	12398915	+	83	NA	Intergenic	Intergenic	23497	ENSMUST00000179834.1	ENSMUSG00000093864	ENSMUST00000179834			Gm22633			snRNA
Sox9_E11_Sample1_peak_353	chr1	12435402	12436470	+	51	NA	Intergenic	Intergenic	9950	ENSMUST00000183490.1	ENSMUSG00000098555	ENSMUST00000183490			Mir6341			miRNA
Sox9_E11_Sample1_peak_354	chr1	12572244	12573265	+	97	NA	Intergenic	Intergenic	7177	ENSMUST00000181461.1	ENSMUSG00000097628	ENSMUST00000181461			Gm2383			processed_pseudogene
Sox9_E11_Sample1_peak_355	chr1	12670201	12671043	+	49	NA	exon (ENSMUST00000186962.1, exon 1 of 1)	lncRNA-exon (ENSMUST00000186962.1, exon 1 of 1)	554	ENSMUST00000186962.1	ENSMUSG00000101314	ENSMUST00000186962			Gm29663			lncRNA
Sox9_E11_Sample1_peak_356	chr1	12683994	12684269	+	39	NA	Intergenic	Intergenic	-8146	ENSMUST00000177608.7	ENSMUSG00000016918	ENSMUST00000187376			Sulf1			protein_coding
Sox9_E11_Sample1_peak_357	chr1	12691932	12693446	+	545	NA	intron (ENSMUST00000180062.7, intron 1 of 20)	protein_coding-intron (ENSMUST00000177608.7, intron 1 of 21)	157	ENSMUST00000186051.6	ENSMUSG00000016918	ENSMUST00000187376			Sulf1			protein_coding
Sox9_E11_Sample1_peak_358	chr1	12710744	12711711	+	153	NA	intron (ENSMUST00000180062.7, intron 1 of 20)	protein_coding-intron (ENSMUST00000177608.7, intron 1 of 21)	-7232	ENSMUST00000187376.6	ENSMUSG00000016918	ENSMUST00000187376			Sulf1			protein_coding
Sox9_E11_Sample1_peak_359	chr1	12717989	12718875	+	180	NA	promoter-TSS (ENSMUST00000088585.9)	protein_coding-promoter-TSS (ENSMUST00000088585.9)	-27	ENSMUST00000187376.6	ENSMUSG00000016918	ENSMUST00000187376			Sulf1			protein_coding
Sox9_E11_Sample1_peak_360	chr1	12744725	12745226	+	93	NA	intron (ENSMUST00000088585.9, intron 2 of 21)	protein_coding-intron (ENSMUST00000088585.9, intron 2 of 21)	16856	ENSMUST00000186405.6	ENSMUSG00000016918	ENSMUST00000187376			Sulf1			protein_coding
Sox9_E11_Sample1_peak_361	chr1	12811241	12811905	+	30	NA	intron (ENSMUST00000177608.7, intron 7 of 21)	protein_coding-intron (ENSMUST00000088585.9, intron 7 of 21)	-24455	ENSMUST00000189447.1	ENSMUSG00000016918	ENSMUST00000187376			Sulf1			protein_coding
Sox9_E11_Sample1_peak_362	chr1	12835739	12836949	+	253	NA	intron (ENSMUST00000177608.7, intron 13 of 21)	protein_coding-intron (ENSMUST00000088585.9, intron 13 of 21)	316	ENSMUST00000189447.1	ENSMUSG00000016918	ENSMUST00000187376			Sulf1			protein_coding
Sox9_E11_Sample1_peak_363	chr1	12864044	12864688	+	44	NA	Intergenic	Intergenic	21575	ENSMUST00000185780.1	ENSMUSG00000016918	ENSMUST00000187376			Sulf1			protein_coding
Sox9_E11_Sample1_peak_364	chr1	12865133	12865242	+	32	NA	Intergenic	Intergenic	22396	ENSMUST00000185780.1	ENSMUSG00000016918	ENSMUST00000187376			Sulf1			protein_coding
Sox9_E11_Sample1_peak_365	chr1	12875601	12875900	+	85	NA	intron (ENSMUST00000115402.7, intron 7 of 7)	protein_coding-intron (ENSMUST00000115402.7, intron 7 of 7)	32959	ENSMUST00000185780.1	ENSMUSG00000016918	ENSMUST00000187376			Sulf1			protein_coding
Sox9_E11_Sample1_peak_366	chr1	12990413	12992805	+	335	NA	promoter-TSS (ENSMUST00000115402.7)	protein_coding-promoter-TSS (ENSMUST00000115402.7)	-432	ENSMUST00000115402.7	ENSMUSG00000025938	ENSMUST00000115403			Slco5a1			protein_coding
Sox9_E11_Sample1_peak_368	chr1	13069432	13069857	+	68	NA	intron (ENSMUST00000187394.1, intron 1 of 3)	lncRNA-intron (ENSMUST00000187394.1, intron 1 of 3)	806	ENSMUST00000187394.1	ENSMUSG00000099498	ENSMUST00000187394			Gm29283			lncRNA
Sox9_E11_Sample1_peak_369	chr1	13103503	13104326	+	54	NA	Intergenic	Intergenic	23249	ENSMUST00000047577.6	ENSMUSG00000042414	ENSMUST00000047577			Prdm14			protein_coding
Sox9_E11_Sample1_peak_371	chr1	13125224	13127087	+	35	NA	intron (ENSMUST00000047577.6, intron 1 of 7)	protein_coding-intron (ENSMUST00000047577.6, intron 1 of 7)	1008	ENSMUST00000047577.6	ENSMUSG00000042414	ENSMUST00000047577			Prdm14			protein_coding
Sox9_E11_Sample1_peak_372	chr1	13128230	13128859	+	90	NA	Intergenic	Intergenic	-1381	ENSMUST00000047577.6	ENSMUSG00000042414	ENSMUST00000047577			Prdm14			protein_coding
Sox9_E11_Sample1_peak_374	chr1	13244551	13244803	+	31	NA	intron (ENSMUST00000145280.1, intron 1 of 3)	protein_coding-intron (ENSMUST00000139970.7, intron 2 of 6)	-8243	ENSMUST00000195811.1	ENSMUSG00000103495	ENSMUST00000195811			Gm37409			TEC
Sox9_E11_Sample1_peak_375	chr1	13277975	13278686	+	124	NA	intron (ENSMUST00000145280.1, intron 1 of 3)	protein_coding-intron (ENSMUST00000006037.12, intron 2 of 22)	12176	ENSMUST00000194484.1	ENSMUSG00000102639	ENSMUST00000194484			Gm38223			TEC
Sox9_E11_Sample1_peak_376	chr1	13291009	13291795	+	145	NA	promoter-TSS (ENSMUST00000194484.1)	TEC-promoter-TSS (ENSMUST00000194484.1)	-896	ENSMUST00000194484.1	ENSMUSG00000102639	ENSMUST00000194484			Gm38223			TEC
Sox9_E11_Sample1_peak_377	chr1	13300412	13301436	+	157	NA	intron (ENSMUST00000143603.7, intron 1 of 12)	protein_coding-intron (ENSMUST00000143603.7, intron 1 of 12)	-1202	ENSMUST00000145280.1	ENSMUSG00000005886	ENSMUST00000143603			Ncoa2			protein_coding
Sox9_E11_Sample1_peak_378	chr1	13314084	13314676	+	106	NA	intron (ENSMUST00000143603.7, intron 1 of 12)	protein_coding-intron (ENSMUST00000143603.7, intron 1 of 12)	-14658	ENSMUST00000145280.1	ENSMUSG00000005886	ENSMUST00000143603			Ncoa2			protein_coding
Sox9_E11_Sample1_peak_379	chr1	13364228	13365193	+	146	NA	intron (ENSMUST00000143603.7, intron 1 of 12)	protein_coding-intron (ENSMUST00000006037.12, intron 1 of 22)	7719	ENSMUST00000139970.7	ENSMUSG00000005886	ENSMUST00000143603			Ncoa2			protein_coding
Sox9_E11_Sample1_peak_380	chr1	13372160	13374585	+	397	NA	promoter-TSS (ENSMUST00000081713.10)	protein_coding-promoter-TSS (ENSMUST00000081713.10)	657	ENSMUST00000124088.1	ENSMUSG00000005886	ENSMUST00000143603			Ncoa2			protein_coding
Sox9_E11_Sample1_peak_381	chr1	13426305	13426988	+	127	NA	Intergenic	Intergenic	-18991	ENSMUST00000187246.1	ENSMUSG00000101171	ENSMUST00000187246			Gm7593			processed_pseudogene
Sox9_E11_Sample1_peak_383	chr1	13496057	13496767	+	98	NA	Intergenic	Intergenic	83386	ENSMUST00000185447.1	ENSMUSG00000025935	ENSMUST00000027068			Tram1			protein_coding
Sox9_E11_Sample1_peak_384	chr1	13561502	13561927	+	23	NA	Intergenic	Intergenic	18084	ENSMUST00000185447.1	ENSMUSG00000025935	ENSMUST00000027068			Tram1			protein_coding
Sox9_E11_Sample1_peak_385	chr1	13589177	13590521	+	189	NA	promoter-TSS (ENSMUST00000027068.10)	protein_coding-promoter-TSS (ENSMUST00000027068.10)	26	ENSMUST00000188377.1	ENSMUSG00000025935	ENSMUST00000027068			Tram1			protein_coding
Sox9_E11_Sample1_peak_386	chr1	13599079	13600035	+	81	NA	Intergenic	Intergenic	-9647	ENSMUST00000027068.10	ENSMUSG00000025935	ENSMUST00000027068			Tram1			protein_coding
Sox9_E11_Sample1_peak_387	chr1	13621815	13622327	+	111	NA	Intergenic	Intergenic	16340	ENSMUST00000156222.1	ENSMUSG00000025937	ENSMUST00000027071			Lactb2			protein_coding
Sox9_E11_Sample1_peak_388	chr1	13659667	13660863	+	384	NA	intron (ENSMUST00000027071.6, intron 1 of 6)	protein_coding-intron (ENSMUST00000027071.6, intron 1 of 6)	281	ENSMUST00000027071.6	ENSMUSG00000025937	ENSMUST00000027071			Lactb2			protein_coding
Sox9_E11_Sample1_peak_389	chr1	13771590	13772093	+	26	NA	Intergenic	Intergenic	2623	ENSMUST00000104180.1	ENSMUSG00000077368	ENSMUST00000104180			Gm26273			snoRNA
Sox9_E11_Sample1_peak_390	chr1	13789365	13789438	+	20	NA	Intergenic	Intergenic	-2522	ENSMUST00000180415.1	ENSMUSG00000097711	ENSMUST00000180415			Gm5523			processed_pseudogene
Sox9_E11_Sample1_peak_393	chr1	14139375	14140515	+	214	NA	Intergenic	Intergenic	-27126	ENSMUST00000193148.1	ENSMUSG00000104209	ENSMUST00000193148			Gm37400			TEC
Sox9_E11_Sample1_peak_394	chr1	14150543	14151583	+	206	NA	Intergenic	Intergenic	-31515	ENSMUST00000179783.1	ENSMUSG00000095853	ENSMUST00000179783			Gm22616			miRNA
Sox9_E11_Sample1_peak_395	chr1	14181323	14182166	+	112	NA	promoter-TSS (ENSMUST00000179783.1)	miRNA-promoter-TSS (ENSMUST00000179783.1)	-834	ENSMUST00000179783.1	ENSMUSG00000095853	ENSMUST00000179783			Gm22616			miRNA
Sox9_E11_Sample1_peak_397	chr1	14308608	14310588	+	276	NA	intron (ENSMUST00000080664.13, intron 1 of 16)	protein_coding-intron (ENSMUST00000027066.12, intron 1 of 17)	238	ENSMUST00000187790.1	ENSMUSG00000025932	ENSMUST00000027066			Eya1			protein_coding
Sox9_E11_Sample1_peak_398	chr1	14506433	14507537	+	211	NA	Intergenic	Intergenic	-196750	ENSMUST00000168081.8	ENSMUSG00000025932	ENSMUST00000027066			Eya1			protein_coding
Sox9_E11_Sample1_peak_400	chr1	14739899	14740266	+	53	NA	Intergenic	Intergenic	-12855	ENSMUST00000187401.1	ENSMUSG00000054493	ENSMUST00000067599			Gm9947			lncRNA
Sox9_E11_Sample1_peak_401	chr1	14755222	14756342	+	229	NA	promoter-TSS (ENSMUST00000190719.1)	protein_coding-promoter-TSS (ENSMUST00000190719.1)	208	ENSMUST00000027062.6	ENSMUSG00000025930	ENSMUST00000027062			Msc			protein_coding
Sox9_E11_Sample1_peak_402	chr1	14800023	14801136	+	67	NA	Intergenic	Intergenic	11934	ENSMUST00000194866.1	ENSMUSG00000103492	ENSMUST00000194866			Gm37412			TEC
Sox9_E11_Sample1_peak_403	chr1	14823454	14823871	+	60	NA	Intergenic	Intergenic	16494	ENSMUST00000121569.1	ENSMUSG00000081201	ENSMUST00000121569			Smt3h2-ps4			processed_pseudogene
Sox9_E11_Sample1_peak_404	chr1	14869285	14870033	+	86	NA	Intergenic	Intergenic	4587	ENSMUST00000121367.1	ENSMUSG00000082193	ENSMUST00000121367			Rpl5-ps1			processed_pseudogene
Sox9_E11_Sample1_peak_405	chr1	14918338	14919344	+	76	NA	promoter-TSS (ENSMUST00000041447.4)	protein_coding-promoter-TSS (ENSMUST00000041447.4)	-6	ENSMUST00000235071.1	ENSMUSG00000032769	ENSMUST00000235071			Trpa1			protein_coding
Sox9_E11_Sample1_peak_406	chr1	15017733	15018151	+	76	NA	Intergenic	Intergenic	1217	ENSMUST00000157534.1	ENSMUSG00000088159	ENSMUST00000157534			Gm26345			snoRNA
Sox9_E11_Sample1_peak_407	chr1	15143764	15144676	+	292	NA	Intergenic	Intergenic	-125061	ENSMUST00000157534.1	ENSMUSG00000088159	ENSMUST00000157534			Gm26345			snoRNA
Sox9_E11_Sample1_peak_408	chr1	15286298	15287491	+	389	NA	promoter-TSS (ENSMUST00000175681.2)	protein_coding-promoter-TSS (ENSMUST00000175681.2)	-360	ENSMUST00000175681.2	ENSMUSG00000092083	ENSMUST00000175681			Kcnb2			protein_coding
Sox9_E11_Sample1_peak_409	chr1	15296822	15297408	+	75	NA	intron (ENSMUST00000175681.2, intron 1 of 2)	protein_coding-intron (ENSMUST00000175681.2, intron 1 of 2)	9861	ENSMUST00000175681.2	ENSMUSG00000092083	ENSMUST00000175681			Kcnb2			protein_coding
Sox9_E11_Sample1_peak_410	chr1	15306951	15308015	+	274	NA	intron (ENSMUST00000175681.2, intron 1 of 2)	protein_coding-intron (ENSMUST00000175681.2, intron 1 of 2)	-4969	ENSMUST00000170146.2	ENSMUSG00000092083	ENSMUST00000175681			Kcnb2			protein_coding
Sox9_E11_Sample1_peak_412	chr1	15455701	15456568	+	85	NA	intron (ENSMUST00000175681.2, intron 2 of 2)	protein_coding-intron (ENSMUST00000170146.2, intron 1 of 1)	91832	ENSMUST00000193873.1	ENSMUSG00000102937	ENSMUST00000193873			Gm38116			TEC
Sox9_E11_Sample1_peak_414	chr1	15791225	15792140	+	180	NA	Intergenic	Intergenic	-13964	ENSMUST00000188371.6	ENSMUSG00000025925	ENSMUST00000188684			Terf1			protein_coding
Sox9_E11_Sample1_peak_415	chr1	15805181	15806481	+	579	NA	exon (ENSMUST00000027057.7, exon 1 of 9)	protein_coding-exon (ENSMUST00000027057.7, exon 1 of 9)	167	ENSMUST00000027057.7	ENSMUSG00000025925	ENSMUST00000188684			Terf1			protein_coding
Sox9_E11_Sample1_peak_416	chr1	15892337	15893352	+	140	NA	promoter-TSS (ENSMUST00000040695.4)	protein_coding-promoter-TSS (ENSMUST00000040695.4)	-122	ENSMUST00000040695.4	ENSMUSG00000032719	ENSMUST00000040695			Sbspon			protein_coding
Sox9_E11_Sample1_peak_417	chr1	15996341	15996952	+	76	NA	Intergenic	Intergenic	-56689	ENSMUST00000185778.1	ENSMUSG00000100652	ENSMUST00000185778			Gm7634			processed_pseudogene
Sox9_E11_Sample1_peak_418	chr1	16071827	16073977	+	46	NA	intron (ENSMUST00000145070.7, intron 4 of 5)	protein_coding-intron (ENSMUST00000115367.7, intron 2 of 3)	8310	ENSMUST00000115367.7	ENSMUSG00000067795	ENSMUST00000115367			4930444P10Rik			protein_coding
Sox9_E11_Sample1_peak_419	chr1	16092726	16093460	+	193	NA	exon (ENSMUST00000145070.7, exon 1 of 6)	protein_coding-exon (ENSMUST00000145070.7, exon 1 of 6)	232	ENSMUST00000145070.7	ENSMUSG00000067795	ENSMUST00000115367			4930444P10Rik			protein_coding
Sox9_E11_Sample1_peak_420	chr1	16104180	16106370	+	474	NA	promoter-TSS (ENSMUST00000027053.7)	protein_coding-promoter-TSS (ENSMUST00000027053.7)	-499	ENSMUST00000027053.7	ENSMUSG00000025921	ENSMUST00000027053			Rdh10			protein_coding
Sox9_E11_Sample1_peak_421	chr1	16153002	16153273	+	39	NA	Intergenic	Intergenic	22635	ENSMUST00000152626.1	ENSMUSG00000025921	ENSMUST00000027053			Rdh10			protein_coding
Sox9_E11_Sample1_peak_422	chr1	16212284	16213081	+	142	NA	Intergenic	Intergenic	-2165	ENSMUST00000192560.1	ENSMUSG00000104165	ENSMUST00000192560			Gm38249			TEC
Sox9_E11_Sample1_peak_423	chr1	16234725	16235866	+	219	NA	intron (ENSMUST00000162627.7, intron 12 of 13)	protein_coding-intron (ENSMUST00000027052.12, intron 11 of 12)	6789	ENSMUST00000186343.1	ENSMUSG00000100868	ENSMUST00000186343			Gm28095			lncRNA
Sox9_E11_Sample1_peak_424	chr1	16249281	16249930	+	37	NA	intron (ENSMUST00000162627.7, intron 12 of 13)	protein_coding-intron (ENSMUST00000027052.12, intron 11 of 12)	-3987	ENSMUST00000160446.7	ENSMUSG00000089982	ENSMUST00000161626			Gm7568			lncRNA
Sox9_E11_Sample1_peak_426	chr1	16265175	16265904	+	71	NA	intron (ENSMUST00000160446.7, intron 3 of 3)	protein_coding-intron (ENSMUST00000027052.12, intron 11 of 12)	11910	ENSMUST00000159190.1	ENSMUSG00000089982	ENSMUST00000161626			Gm7568			lncRNA
Sox9_E11_Sample1_peak_428	chr1	16518574	16520113	+	467	NA	promoter-TSS (ENSMUST00000027052.12)	protein_coding-promoter-TSS (ENSMUST00000027052.12)	-36	ENSMUST00000149320.8	ENSMUSG00000025920	ENSMUST00000162751			Stau2			protein_coding
Sox9_E11_Sample1_peak_429	chr1	16618293	16619888	+	572	NA	exon (ENSMUST00000195710.1, exon 1 of 1)	TEC-exon (ENSMUST00000195710.1, exon 1 of 1)	169	ENSMUST00000133639.1	ENSMUSG00000025939	ENSMUST00000117146			Ube2w			protein_coding
Sox9_E11_Sample1_peak_430	chr1	16656309	16657568	+	711	NA	promoter-TSS (ENSMUST00000181371.1)	lncRNA-promoter-TSS (ENSMUST00000181371.1)	-23	ENSMUST00000186541.1	ENSMUSG00000079658	ENSMUST00000185771			Eloc			protein_coding
Sox9_E11_Sample1_peak_431	chr1	16664764	16665983	+	502	NA	exon (ENSMUST00000065373.5, exon 1 of 3)	protein_coding-exon (ENSMUST00000065373.5, exon 1 of 3)	137	ENSMUST00000176451.1	ENSMUSG00000025940	ENSMUST00000177501			Tmem70			protein_coding
Sox9_E11_Sample1_peak_432	chr1	16688013	16689248	+	226	NA	intron (ENSMUST00000191260.1, intron 2 of 2)	protein_coding-intron (ENSMUST00000026881.10, intron 1 of 4)	122	ENSMUST00000190366.1	ENSMUSG00000025779	ENSMUST00000190366			Ly96			protein_coding
Sox9_E11_Sample1_peak_433	chr1	16824377	16824869	+	111	NA	Intergenic	Intergenic	-54485	ENSMUST00000071842.9	ENSMUSG00000091020	ENSMUST00000071842			Gm5828			processed_pseudogene
Sox9_E11_Sample1_peak_434	chr1	17096827	17098910	+	427	NA	promoter-TSS (ENSMUST00000038382.4)	protein_coding-promoter-TSS (ENSMUST00000038382.4)	21	ENSMUST00000038382.4	ENSMUSG00000042686	ENSMUST00000186024			Jph1			protein_coding
Sox9_E11_Sample1_peak_435	chr1	17122981	17123829	+	50	NA	Intergenic	Intergenic	-1342	ENSMUST00000188872.1	ENSMUSG00000100110	ENSMUST00000188872			Gm28783			lncRNA
Sox9_E11_Sample1_peak_436	chr1	17145373	17145840	+	102	NA	intron (ENSMUST00000150457.1, intron 1 of 2)	protein_coding-intron (ENSMUST00000026879.7, intron 1 of 5)	138	ENSMUST00000189736.1	ENSMUSG00000025777	ENSMUST00000150457			Gdap1			protein_coding
Sox9_E11_Sample1_peak_437	chr1	17163672	17164096	+	32	NA	exon (ENSMUST00000026879.7, exon 6 of 6)	protein_coding-exon (ENSMUST00000026879.7, exon 6 of 6)	-4519	ENSMUST00000187817.1	ENSMUSG00000099899	ENSMUST00000187817			Gm28784			lncRNA
Sox9_E11_Sample1_peak_438	chr1	17415937	17416670	+	135	NA	Intergenic	Intergenic	13225	ENSMUST00000186816.1	ENSMUSG00000102048	ENSMUST00000186816			Gm6075			processed_pseudogene
Sox9_E11_Sample1_peak_439	chr1	17506297	17507248	+	111	NA	Intergenic	Intergenic	-13229	ENSMUST00000158909.1	ENSMUSG00000089534	ENSMUST00000158909			Gm25166			snoRNA
Sox9_E11_Sample1_peak_440	chr1	17726866	17728132	+	371	NA	promoter-TSS (ENSMUST00000149914.1)	lncRNA-promoter-TSS (ENSMUST00000149914.1)	147	ENSMUST00000127328.1	ENSMUSG00000085125	ENSMUST00000149914			Gm16070			lncRNA
Sox9_E11_Sample1_peak_442	chr1	18057431	18058922	+	243	NA	promoter-TSS (ENSMUST00000188360.1)	transcribed_unprocessed_pseudogene-promoter-TSS (ENSMUST00000188360.1)	93	ENSMUST00000188360.1	ENSMUSG00000101717	ENSMUST00000188360			Gm45784			transcribed_unprocessed_pseudogene
Sox9_E11_Sample1_peak_443	chr1	18106316	18106907	+	117	NA	Intergenic	Intergenic	30440	ENSMUST00000115340.7	ENSMUSG00000025774	ENSMUST00000026876			Crisp4			protein_coding
Sox9_E11_Sample1_peak_444	chr1	18223335	18223646	+	32	NA	promoter-TSS (ENSMUST00000126871.1)	unprocessed_pseudogene-promoter-TSS (ENSMUST00000126871.1)	74	ENSMUST00000126871.1	ENSMUSG00000070977	ENSMUST00000126871			Defb44-ps			unprocessed_pseudogene
Sox9_E11_Sample1_peak_445	chr1	19104288	19104765	+	28	NA	exon (ENSMUST00000037294.7, exon 2 of 8)	protein_coding-exon (ENSMUST00000037294.7, exon 2 of 8)	314	ENSMUST00000159108.2	ENSMUSG00000089787	ENSMUST00000159108			Gm15825			lncRNA
Sox9_E11_Sample1_peak_446	chr1	19178997	19179509	+	39	NA	Intergenic	Intergenic	-25287	ENSMUST00000162030.1	ENSMUSG00000100720	ENSMUST00000162030			Gm10075			processed_pseudogene
Sox9_E11_Sample1_peak_447	chr1	19205820	19206355	+	86	NA	Intergenic	Intergenic	-2827	ENSMUST00000027059.10	ENSMUSG00000025927	ENSMUST00000191068			Tfap2b			protein_coding
Sox9_E11_Sample1_peak_448	chr1	19210032	19211256	+	119	NA	intron (ENSMUST00000187754.6, intron 1 of 7)	protein_coding-intron (ENSMUST00000027059.10, intron 1 of 6)	-1410	ENSMUST00000064976.5	ENSMUSG00000025927	ENSMUST00000191068			Tfap2b			protein_coding
Sox9_E11_Sample1_peak_450	chr1	19234871	19235327	+	60	NA	TTS (ENSMUST00000064976.5)	protein_coding-TTS (ENSMUST00000064976.5)	-7626	ENSMUST00000189218.1	ENSMUSG00000100538	ENSMUST00000189218			Gm28340			lncRNA
Sox9_E11_Sample1_peak_451	chr1	19241151	19242307	+	64	NA	promoter-TSS (ENSMUST00000189218.1)	lncRNA-promoter-TSS (ENSMUST00000189218.1)	-996	ENSMUST00000189218.1	ENSMUSG00000100538	ENSMUST00000189218			Gm28340			lncRNA
Sox9_E11_Sample1_peak_453	chr1	19321286	19322358	+	267	NA	Intergenic	Intergenic	-1125	ENSMUST00000190883.1	ENSMUSG00000101117	ENSMUST00000190883			Gm28341			processed_pseudogene
Sox9_E11_Sample1_peak_454	chr1	19473412	19474231	+	152	NA	Intergenic	Intergenic	40098	ENSMUST00000122719.1	ENSMUSG00000084668	ENSMUST00000122719			Gm24633			snoRNA
Sox9_E11_Sample1_peak_457	chr1	20138833	20139168	+	54	NA	intron (ENSMUST00000088448.11, intron 60 of 66)	protein_coding-intron (ENSMUST00000088448.11, intron 60 of 66)	-73452	ENSMUST00000194347.1	ENSMUSG00000104095	ENSMUST00000194347			Gm37315			TEC
Sox9_E11_Sample1_peak_459	chr1	20477531	20478453	+	124	NA	intron (ENSMUST00000088448.11, intron 35 of 66)	protein_coding-intron (ENSMUST00000088448.11, intron 35 of 66)	-33080	ENSMUST00000093665.1	ENSMUSG00000070175	ENSMUST00000093665			Gm24162			snRNA
Sox9_E11_Sample1_peak_460	chr1	20554548	20554647	+	68	NA	intron (ENSMUST00000088448.11, intron 22 of 66)	protein_coding-intron (ENSMUST00000088448.11, intron 22 of 66)	63443	ENSMUST00000128051.1	ENSMUSG00000043760	ENSMUST00000088448			Pkhd1			protein_coding
Sox9_E11_Sample1_peak_461	chr1	20617717	20618574	+	227	NA	promoter-TSS (ENSMUST00000088448.11)	protein_coding-promoter-TSS (ENSMUST00000088448.11)	-81	ENSMUST00000088448.11	ENSMUSG00000043760	ENSMUST00000088448			Pkhd1			protein_coding
Sox9_E11_Sample1_peak_462	chr1	20654015	20654774	+	101	NA	Intergenic	Intergenic	-15488	ENSMUST00000227082.1	ENSMUSG00000099906	ENSMUST00000185494			Gm28653			lncRNA
Sox9_E11_Sample1_peak_463	chr1	20819655	20820684	+	404	NA	promoter-TSS (ENSMUST00000185296.1)	protein_coding-promoter-TSS (ENSMUST00000185296.1)	91	ENSMUST00000185296.1	ENSMUSG00000041859	ENSMUST00000188112			Mcm3			protein_coding
Sox9_E11_Sample1_peak_465	chr1	20890081	20891540	+	511	NA	promoter-TSS (ENSMUST00000181654.1)	lncRNA-promoter-TSS (ENSMUST00000181654.1)	204	ENSMUST00000189400.6	ENSMUSG00000025931	ENSMUST00000189400			Paqr8			protein_coding
Sox9_E11_Sample1_peak_467	chr1	20939278	20940634	+	72	NA	TTS (ENSMUST00000068880.13)	protein_coding-TTS (ENSMUST00000068880.13)	-5755	ENSMUST00000185639.1	ENSMUSG00000100929	ENSMUST00000185639			Gm28064			processed_pseudogene
Sox9_E11_Sample1_peak_468	chr1	20951096	20952175	+	332	NA	promoter-TSS (ENSMUST00000038447.5)	protein_coding-promoter-TSS (ENSMUST00000038447.5)	9	ENSMUST00000160782.1	ENSMUSG00000041809	ENSMUST00000038447			Efhc1			protein_coding
Sox9_E11_Sample1_peak_469	chr1	20996595	20998275	+	199	NA	exon (ENSMUST00000037998.5, exon 11 of 11)	protein_coding-exon (ENSMUST00000037998.5, exon 11 of 11)	45747	ENSMUST00000038447.5	ENSMUSG00000041809	ENSMUST00000038447			Efhc1			protein_coding
Sox9_E11_Sample1_peak_470	chr1	21050990	21052819	+	120	NA	intron (ENSMUST00000037998.5, intron 1 of 10)	protein_coding-intron (ENSMUST00000037998.5, intron 1 of 10)	-8248	ENSMUST00000187210.1	ENSMUSG00000041779	ENSMUST00000187210			Tram2			protein_coding
Sox9_E11_Sample1_peak_471	chr1	21078526	21079733	+	294	NA	promoter-TSS (ENSMUST00000037998.5)	protein_coding-promoter-TSS (ENSMUST00000037998.5)	100	ENSMUST00000037998.5	ENSMUSG00000041779	ENSMUST00000187210			Tram2			protein_coding
Sox9_E11_Sample1_peak_472	chr1	21101204	21101688	+	53	NA	Intergenic	Intergenic	21332	ENSMUST00000186612.1	ENSMUSG00000099971	ENSMUST00000186612			Gm28287			lncRNA
Sox9_E11_Sample1_peak_473	chr1	21132164	21132982	+	108	NA	Intergenic	Intergenic	-46415	ENSMUST00000189119.1	ENSMUSG00000100819	ENSMUST00000189119			Gm2693			unprocessed_pseudogene
Sox9_E11_Sample1_peak_475	chr1	21166136	21167134	+	300	NA	Intergenic	Intergenic	-12353	ENSMUST00000189119.1	ENSMUSG00000100819	ENSMUST00000189119			Gm2693			unprocessed_pseudogene
Sox9_E11_Sample1_peak_476	chr1	21210367	21210800	+	74	NA	Intergenic	Intergenic	-7992	ENSMUST00000027065.11	ENSMUSG00000025933	ENSMUST00000027065			Tmem14a			protein_coding
Sox9_E11_Sample1_peak_477	chr1	21218516	21219448	+	363	NA	intron (ENSMUST00000027065.11, intron 1 of 4)	protein_coding-intron (ENSMUST00000027064.7, intron 1 of 4)	320	ENSMUST00000027064.7	ENSMUSG00000025933	ENSMUST00000027065			Tmem14a			protein_coding
Sox9_E11_Sample1_peak_478	chr1	21252505	21253088	+	60	NA	promoter-TSS (ENSMUST00000190711.1)	protein_coding-promoter-TSS (ENSMUST00000190711.1)	-725	ENSMUST00000190711.1	ENSMUSG00000025934	ENSMUST00000121676			Gsta3			protein_coding
Sox9_E11_Sample1_peak_479	chr1	21271352	21272365	+	165	NA	promoter-TSS (ENSMUST00000178379.2)	unprocessed_pseudogene-promoter-TSS (ENSMUST00000178379.2)	-265	ENSMUST00000185842.1	ENSMUSG00000099343	ENSMUST00000185842			Gm28836			lncRNA
Sox9_E11_Sample1_peak_480	chr1	21278996	21279408	+	51	NA	Intergenic	Intergenic	6799	ENSMUST00000178379.2	ENSMUSG00000096375	ENSMUST00000178379			Gm7094			unprocessed_pseudogene
Sox9_E11_Sample1_peak_481	chr1	21650696	21651444	+	46	NA	intron (ENSMUST00000115299.7, intron 1 of 8)	protein_coding-intron (ENSMUST00000029667.12, intron 1 of 13)	-138014	ENSMUST00000119064.1	ENSMUSG00000082935	ENSMUST00000119064			Gm7658			processed_pseudogene
Sox9_E11_Sample1_peak_483	chr1	21855747	21856441	+	26	NA	promoter-TSS (ENSMUST00000134505.1)	protein_coding-promoter-TSS (ENSMUST00000134505.1)	-192	ENSMUST00000134505.1	ENSMUSG00000028033	ENSMUST00000174183			Kcnq5			protein_coding
Sox9_E11_Sample1_peak_484	chr1	21890746	21890808	+	76	NA	intron (ENSMUST00000115299.7, intron 1 of 8)	protein_coding-intron (ENSMUST00000029667.12, intron 1 of 13)	-34875	ENSMUST00000134505.1	ENSMUSG00000028033	ENSMUST00000174183			Kcnq5			protein_coding
Sox9_E11_Sample1_peak_485	chr1	21960439	21962250	+	329	NA	exon (ENSMUST00000029667.12, exon 1 of 14)	protein_coding-exon (ENSMUST00000029667.12, exon 1 of 14)	237	ENSMUST00000029667.12	ENSMUSG00000028033	ENSMUST00000174183			Kcnq5			protein_coding
Sox9_E11_Sample1_peak_487	chr1	22206607	22207415	+	145	NA	Intergenic	Intergenic	-30838	ENSMUST00000190225.1	ENSMUSG00000100418	ENSMUST00000190225			Gm28239			processed_pseudogene
Sox9_E11_Sample1_peak_490	chr1	22533203	22534120	+	298	NA	TTS (ENSMUST00000218140.1)	protein_coding-TTS (ENSMUST00000218140.1)	-21132	ENSMUST00000239255.1	ENSMUSG00000041670	ENSMUST00000097808			Rims1			protein_coding
Sox9_E11_Sample1_peak_491	chr1	22805414	22806474	+	278	NA	promoter-TSS (ENSMUST00000081544.12)	protein_coding-promoter-TSS (ENSMUST00000081544.12)	50	ENSMUST00000218140.1	ENSMUSG00000041670	ENSMUST00000097808			Rims1			protein_coding
Sox9_E11_Sample1_peak_493	chr1	23061778	23062478	+	69	NA	intron (ENSMUST00000191045.1, intron 3 of 3)	lncRNA-intron (ENSMUST00000191045.1, intron 3 of 3)	40125	ENSMUST00000073179.5	ENSMUSG00000073730	ENSMUST00000073179			Ppp1r14bl			protein_coding
Sox9_E11_Sample1_peak_494	chr1	23084580	23084912	+	68	NA	intron (ENSMUST00000191045.1, intron 3 of 3)	lncRNA-intron (ENSMUST00000191045.1, intron 3 of 3)	17507	ENSMUST00000073179.5	ENSMUSG00000073730	ENSMUST00000073179			Ppp1r14bl			protein_coding
Sox9_E11_Sample1_peak_495	chr1	23113978	23114789	+	35	NA	intron (ENSMUST00000191045.1, intron 3 of 3)	lncRNA-intron (ENSMUST00000191045.1, intron 3 of 3)	-12130	ENSMUST00000073179.5	ENSMUSG00000073730	ENSMUST00000073179			Ppp1r14bl			protein_coding
Sox9_E11_Sample1_peak_498	chr1	23190337	23190838	+	104	NA	intron (ENSMUST00000191045.1, intron 2 of 3)	lncRNA-intron (ENSMUST00000191045.1, intron 2 of 3)	45086	ENSMUST00000191045.1	ENSMUSG00000101227	ENSMUST00000191045			Gm29506			lncRNA
Sox9_E11_Sample1_peak_499	chr1	23200397	23200991	+	38	NA	intron (ENSMUST00000191045.1, intron 2 of 3)	lncRNA-intron (ENSMUST00000191045.1, intron 2 of 3)	34979	ENSMUST00000191045.1	ENSMUSG00000101227	ENSMUST00000191045			Gm29506			lncRNA
Sox9_E11_Sample1_peak_500	chr1	23255712	23257355	+	706	NA	promoter-TSS (ENSMUST00000193885.1)	TEC-promoter-TSS (ENSMUST00000193885.1)	-126	ENSMUST00000193885.1	ENSMUSG00000102766	ENSMUST00000195365			Gm6420			TEC
Sox9_E11_Sample1_peak_502	chr1	23270642	23272169	+	278	NA	promoter-TSS (ENSMUST00000083471.3)	miRNA-promoter-TSS (ENSMUST00000083471.3)	-864	ENSMUST00000083471.3	ENSMUSG00000065405	ENSMUST00000083471			Mir30a			miRNA
Sox9_E11_Sample1_peak_504	chr1	23321379	23321896	+	60	NA	Intergenic	Intergenic	24962	ENSMUST00000189078.1	ENSMUSG00000101226	ENSMUST00000189078			Gm20954			processed_pseudogene
Sox9_E11_Sample1_peak_506	chr1	23382499	23383748	+	619	NA	promoter-TSS (ENSMUST00000027343.5)	protein_coding-promoter-TSS (ENSMUST00000027343.5)	52	ENSMUST00000027343.5	ENSMUSG00000026158	ENSMUST00000189537			Ogfrl1			protein_coding
Sox9_E11_Sample1_peak_509	chr1	23747372	23747999	+	53	NA	Intergenic	Intergenic	-14068	ENSMUST00000144602.1	ENSMUSG00000026156	ENSMUST00000063663			B3gat2			protein_coding
Sox9_E11_Sample1_peak_510	chr1	23761687	23764184	+	374	NA	exon (ENSMUST00000063663.5, exon 1 of 4)	protein_coding-exon (ENSMUST00000063663.5, exon 1 of 4)	924	ENSMUST00000140583.1	ENSMUSG00000026156	ENSMUST00000063663			B3gat2			protein_coding
Sox9_E11_Sample1_peak_513	chr1	23827023	23827563	+	102	NA	intron (ENSMUST00000063663.5, intron 2 of 3)	protein_coding-intron (ENSMUST00000063663.5, intron 2 of 3)	20484	ENSMUST00000136506.1	ENSMUSG00000026155	ENSMUST00000148710			Smap1			protein_coding
Sox9_E11_Sample1_peak_514	chr1	23891956	23892600	+	64	NA	promoter-TSS (ENSMUST00000133398.1)	protein_coding-promoter-TSS (ENSMUST00000133398.1)	-284	ENSMUST00000133398.1	ENSMUSG00000026155	ENSMUST00000148710			Smap1			protein_coding
Sox9_E11_Sample1_peak_515	chr1	23921646	23922657	+	446	NA	exon (ENSMUST00000027339.13, exon 1 of 10)	protein_coding-exon (ENSMUST00000027339.13, exon 1 of 10)	166	ENSMUST00000027339.13	ENSMUSG00000026155	ENSMUST00000148710			Smap1			protein_coding
Sox9_E11_Sample1_peak_516	chr1	23959017	23959551	+	102	NA	Intergenic	Intergenic	-36967	ENSMUST00000027339.13	ENSMUSG00000026155	ENSMUST00000148710			Smap1			protein_coding
Sox9_E11_Sample1_peak_517	chr1	24004647	24005911	+	308	NA	promoter-TSS (ENSMUST00000192339.1)	TEC-promoter-TSS (ENSMUST00000192339.1)	-226	ENSMUST00000192339.1	ENSMUSG00000102495	ENSMUST00000192339			Gm26524			TEC
Sox9_E11_Sample1_peak_518	chr1	24099495	24100787	+	425	NA	promoter-TSS (ENSMUST00000186999.6)	protein_coding-promoter-TSS (ENSMUST00000186999.6)	41	ENSMUST00000187369.6	ENSMUSG00000026153	ENSMUST00000185525			Fam135a			protein_coding
Sox9_E11_Sample1_peak_519	chr1	24107547	24108602	+	224	NA	Intergenic	Intergenic	7449	ENSMUST00000192408.1	ENSMUSG00000102398	ENSMUST00000192408			Gm37580			TEC
Sox9_E11_Sample1_peak_520	chr1	24171394	24171890	+	20	NA	Intergenic	Intergenic	-5968	ENSMUST00000054588.14	ENSMUSG00000026147	ENSMUST00000054588			Col9a1			protein_coding
Sox9_E11_Sample1_peak_521	chr1	24195202	24196622	+	157	NA	intron (ENSMUST00000054588.14, intron 7 of 37)	protein_coding-intron (ENSMUST00000054588.14, intron 7 of 37)	725	ENSMUST00000088349.2	ENSMUSG00000026147	ENSMUST00000054588			Col9a1			protein_coding
Sox9_E11_Sample1_peak_522	chr1	24230180	24230977	+	129	NA	intron (ENSMUST00000088349.2, intron 23 of 31)	protein_coding-intron (ENSMUST00000054588.14, intron 29 of 37)	1061	ENSMUST00000147902.1	ENSMUSG00000026147	ENSMUST00000054588			Col9a1			protein_coding
Sox9_E11_Sample1_peak_524	chr1	24302591	24303419	+	68	NA	intron (ENSMUST00000115244.8, intron 37 of 50)	protein_coding-intron (ENSMUST00000051344.5, intron 37 of 47)	73488	ENSMUST00000147902.1	ENSMUSG00000026147	ENSMUST00000054588			Col9a1			protein_coding
Sox9_E11_Sample1_peak_525	chr1	24378264	24378834	+	94	NA	intron (ENSMUST00000051344.5, intron 15 of 47)	protein_coding-intron (ENSMUST00000051344.5, intron 15 of 47)	74196	ENSMUST00000144297.1	ENSMUSG00000026141	ENSMUST00000051344			Col19a1			protein_coding
Sox9_E11_Sample1_peak_526	chr1	24586202	24587466	+	141	NA	intron (ENSMUST00000115244.8, intron 1 of 50)	protein_coding-intron (ENSMUST00000051344.5, intron 1 of 47)	577	ENSMUST00000051344.5	ENSMUSG00000026141	ENSMUST00000051344			Col19a1			protein_coding
Sox9_E11_Sample1_peak_527	chr1	24633314	24634006	+	85	NA	Intergenic	Intergenic	-17463	ENSMUST00000187117.1	ENSMUSG00000101249	ENSMUST00000187117			Gm29216			unprocessed_pseudogene
Sox9_E11_Sample1_peak_528	chr1	24677994	24679478	+	389	NA	promoter-TSS (ENSMUST00000095062.9)	protein_coding-promoter-TSS (ENSMUST00000095062.9)	-3	ENSMUST00000186190.1	ENSMUSG00000073725	ENSMUST00000187468			Lmbrd1			protein_coding
Sox9_E11_Sample1_peak_529	chr1	24699075	24699824	+	92	NA	intron (ENSMUST00000186096.6, intron 3 of 5)	protein_coding-intron (ENSMUST00000095062.9, intron 3 of 15)	20523	ENSMUST00000095062.9	ENSMUSG00000073725	ENSMUST00000187468			Lmbrd1			protein_coding
Sox9_E11_Sample1_peak_531	chr1	24741744	24742553	+	55	NA	intron (ENSMUST00000095062.9, intron 9 of 15)	protein_coding-intron (ENSMUST00000095062.9, intron 9 of 15)	-2725	ENSMUST00000190195.1	ENSMUSG00000073725	ENSMUST00000187468			Lmbrd1			protein_coding
Sox9_E11_Sample1_peak_532	chr1	24991560	24992446	+	71	NA	Intergenic	Intergenic	-19938	ENSMUST00000188406.1	ENSMUSG00000100450	ENSMUST00000188406			Gm9443			processed_pseudogene
Sox9_E11_Sample1_peak_534	chr1	25063718	25064682	+	76	NA	Intergenic	Intergenic	-36968	ENSMUST00000185379.1	ENSMUSG00000099392	ENSMUST00000185379			Gm29414			lncRNA
Sox9_E11_Sample1_peak_536	chr1	25107647	25108598	+	148	NA	intron (ENSMUST00000135518.7, intron 26 of 31)	protein_coding-intron (ENSMUST00000041838.6, intron 24 of 29)	-80890	ENSMUST00000185379.1	ENSMUSG00000099392	ENSMUST00000185379			Gm29414			lncRNA
Sox9_E11_Sample1_peak_537	chr1	25204441	25205044	+	54	NA	promoter-TSS (ENSMUST00000154102.1)	protein_coding-promoter-TSS (ENSMUST00000154102.1)	-19	ENSMUST00000154102.1	ENSMUSG00000033569	ENSMUST00000190202			Adgrb3			protein_coding
Sox9_E11_Sample1_peak_538	chr1	25228304	25229050	+	243	NA	exon (ENSMUST00000126096.7, exon 1 of 12)	protein_coding-exon (ENSMUST00000126096.7, exon 1 of 12)	149	ENSMUST00000126626.7	ENSMUSG00000033569	ENSMUST00000190202			Adgrb3			protein_coding
Sox9_E11_Sample1_peak_539	chr1	25510274	25510740	+	39	NA	intron (ENSMUST00000041838.6, intron 6 of 29)	protein_coding-intron (ENSMUST00000041838.6, intron 6 of 29)	59436	ENSMUST00000122791.1	ENSMUSG00000084740	ENSMUST00000122791			Gm25294			snRNA
Sox9_E11_Sample1_peak_540	chr1	25576961	25577989	+	47	NA	intron (ENSMUST00000146592.7, intron 1 of 28)	protein_coding-intron (ENSMUST00000146592.7, intron 1 of 28)	33709	ENSMUST00000195543.1	ENSMUSG00000103889	ENSMUST00000195543			Gm37011			TEC
Sox9_E11_Sample1_peak_541	chr1	25829750	25830915	+	267	NA	promoter-TSS (ENSMUST00000135518.7)	protein_coding-promoter-TSS (ENSMUST00000135518.7)	-325	ENSMUST00000194343.1	ENSMUSG00000104516	ENSMUST00000194343			Gm9884			TEC
Sox9_E11_Sample1_peak_542	chr1	26759804	26760601	+	71	NA	Intergenic	Intergenic	-72742	ENSMUST00000097801.3	ENSMUSG00000073722	ENSMUST00000097801			4931408C20Rik			protein_coding
Sox9_E11_Sample1_peak_543	chr1	28720888	28722034	+	101	NA	Intergenic	Intergenic	58791	ENSMUST00000059937.4	ENSMUSG00000048411	ENSMUST00000059937			Gm597			protein_coding
Sox9_E11_Sample1_peak_544	chr1	30464366	30464820	+	60	NA	Intergenic	Intergenic	-131196	ENSMUST00000184585.1	ENSMUSG00000098883	ENSMUST00000184585			Gm27430			miRNA
Sox9_E11_Sample1_peak_545	chr1	30683709	30685161	+	78	NA	Intergenic	Intergenic	35527	ENSMUST00000065469.2	ENSMUSG00000053185	ENSMUST00000065469			Gm9898			lncRNA
Sox9_E11_Sample1_peak_546	chr1	30718235	30719312	+	207	NA	exon (ENSMUST00000065469.2, exon 2 of 2)	lncRNA-exon (ENSMUST00000065469.2, exon 2 of 2)	1189	ENSMUST00000065469.2	ENSMUSG00000053185	ENSMUST00000065469			Gm9898			lncRNA
Sox9_E11_Sample1_peak_547	chr1	30808263	30808648	+	52	NA	intron (ENSMUST00000088310.9, intron 13 of 14)	protein_coding-intron (ENSMUST00000088310.9, intron 13 of 14)	650	ENSMUST00000190190.1	ENSMUSG00000048874	ENSMUST00000191329			Phf3			protein_coding
Sox9_E11_Sample1_peak_548	chr1	30872823	30874206	+	488	NA	promoter-TSS (ENSMUST00000185604.1)	protein_coding-promoter-TSS (ENSMUST00000185604.1)	-39	ENSMUST00000185604.1	ENSMUSG00000048874	ENSMUST00000191329			Phf3			protein_coding
Sox9_E11_Sample1_peak_549	chr1	30908880	30909338	+	79	NA	Intergenic	Intergenic	-35188	ENSMUST00000191245.6	ENSMUSG00000048874	ENSMUST00000191329			Phf3			protein_coding
Sox9_E11_Sample1_peak_550	chr1	30939482	30940314	+	35	NA	TTS (ENSMUST00000027232.14)	protein_coding-TTS (ENSMUST00000027232.14)	4406	ENSMUST00000130934.1	ENSMUSG00000026064	ENSMUST00000130934			Ptp4a1			protein_coding
Sox9_E11_Sample1_peak_551	chr1	30948835	30950598	+	466	NA	promoter-TSS (ENSMUST00000027232.14)	protein_coding-promoter-TSS (ENSMUST00000027232.14)	-25	ENSMUST00000238874.1	ENSMUSG00000117310	ENSMUST00000233506			Ptp4a1			protein_coding
Sox9_E11_Sample1_peak_553	chr1	31051111	31051837	+	32	NA	intron (ENSMUST00000233331.1, intron 2 of 4)	protein_coding-intron (ENSMUST00000187892.7, intron 4 of 5)	9555	ENSMUST00000191364.1	ENSMUSG00000100237	ENSMUST00000191364			Gm28644			lncRNA
Sox9_E11_Sample1_peak_554	chr1	31094403	31096318	+	247	NA	intron (ENSMUST00000187892.7, intron 3 of 5)	protein_coding-intron (ENSMUST00000187892.7, intron 3 of 5)	1094	ENSMUST00000188605.1	ENSMUSG00000086727	ENSMUST00000187892			4931428L18Rik			protein_coding
Sox9_E11_Sample1_peak_555	chr1	31102914	31103558	+	60	NA	intron (ENSMUST00000187892.7, intron 3 of 5)	protein_coding-intron (ENSMUST00000187892.7, intron 3 of 5)	-6782	ENSMUST00000188605.1	ENSMUSG00000086727	ENSMUST00000187892			4931428L18Rik			protein_coding
Sox9_E11_Sample1_peak_557	chr1	31149725	31150737	+	193	NA	TTS (ENSMUST00000186448.1)	lncRNA-TTS (ENSMUST00000186448.1)	14205	ENSMUST00000186448.1	ENSMUSG00000100910	ENSMUST00000186448			Gm29128			lncRNA
Sox9_E11_Sample1_peak_558	chr1	31156398	31156970	+	143	NA	intron (ENSMUST00000127775.7, intron 2 of 2)	protein_coding-intron (ENSMUST00000127775.7, intron 2 of 2)	-7865	ENSMUST00000189666.1	ENSMUSG00000099796	ENSMUST00000189666			Gm7893			processed_pseudogene
Sox9_E11_Sample1_peak_560	chr1	31640575	31641364	+	72	NA	Intergenic	Intergenic	15769	ENSMUST00000157995.1	ENSMUSG00000088620	ENSMUST00000157995			Gm23032			snRNA
Sox9_E11_Sample1_peak_562	chr1	32172173	32173200	+	402	NA	promoter-TSS (ENSMUST00000027226.11)	protein_coding-promoter-TSS (ENSMUST00000027226.11)	-28	ENSMUST00000027226.11	ENSMUSG00000026058	ENSMUST00000185666			Khdrbs2			protein_coding
Sox9_E11_Sample1_peak_564	chr1	33271436	33271916	+	46	NA	Intergenic	Intergenic	-22000	ENSMUST00000083289.1	ENSMUSG00000065223	ENSMUST00000083289			Gm25792			snRNA
Sox9_E11_Sample1_peak_565	chr1	33500067	33500266	+	82	NA	intron (ENSMUST00000027312.10, intron 10 of 13)	protein_coding-intron (ENSMUST00000027312.10, intron 10 of 13)	18065	ENSMUST00000185489.1	ENSMUSG00000101682	ENSMUST00000185489			Gm29228			processed_pseudogene
Sox9_E11_Sample1_peak_566	chr1	33567592	33569119	+	53	NA	intron (ENSMUST00000027312.10, intron 7 of 13)	protein_coding-intron (ENSMUST00000027312.10, intron 7 of 13)	48477	ENSMUST00000192891.1	ENSMUSG00000102714	ENSMUST00000192891			Gm37618			TEC
Sox9_E11_Sample1_peak_567	chr1	33583711	33584319	+	32	NA	intron (ENSMUST00000027312.10, intron 7 of 13)	protein_coding-intron (ENSMUST00000027312.10, intron 7 of 13)	32817	ENSMUST00000192891.1	ENSMUSG00000102714	ENSMUST00000192891			Gm37618			TEC
Sox9_E11_Sample1_peak_570	chr1	33657586	33658472	+	102	NA	TTS (ENSMUST00000185377.1)	processed_pseudogene-TTS (ENSMUST00000185377.1)	248	ENSMUST00000185377.1	ENSMUSG00000102093	ENSMUST00000185377			Gm17813			processed_pseudogene
Sox9_E11_Sample1_peak_571	chr1	33669372	33670647	+	576	NA	promoter-TSS (ENSMUST00000027312.10)	protein_coding-promoter-TSS (ENSMUST00000027312.10)	166	ENSMUST00000191965.1	ENSMUSG00000103746	ENSMUST00000191779			1700001G17Rik			TEC
Sox9_E11_Sample1_peak_573	chr1	33719784	33720717	+	409	NA	promoter-TSS (ENSMUST00000115174.3)	protein_coding-promoter-TSS (ENSMUST00000115174.3)	112	ENSMUST00000151482.7	ENSMUSG00000004768	ENSMUST00000151482			Rab23			protein_coding
Sox9_E11_Sample1_peak_574	chr1	33739254	33739494	+	48	NA	TTS (ENSMUST00000122822.1)	protein_coding-TTS (ENSMUST00000122822.1)	1237	ENSMUST00000132066.3	ENSMUSG00000004768	ENSMUST00000151482			Rab23			protein_coding
Sox9_E11_Sample1_peak_575	chr1	33756506	33758218	+	172	NA	exon (ENSMUST00000189741.1, exon 1 of 1)	protein_coding-exon (ENSMUST00000189741.1, exon 1 of 1)	365	ENSMUST00000189741.1	ENSMUSG00000042215	ENSMUST00000044691			Bag2			protein_coding
Sox9_E11_Sample1_peak_576	chr1	33766949	33767584	+	199	NA	intron (ENSMUST00000139143.7, intron 11 of 12)	protein_coding-intron (ENSMUST00000019861.12, intron 13 of 14)	-9471	ENSMUST00000044691.8	ENSMUSG00000042215	ENSMUST00000044691			Bag2			protein_coding
Sox9_E11_Sample1_peak_577	chr1	33813661	33814908	+	398	NA	promoter-TSS (ENSMUST00000130376.2)	protein_coding-promoter-TSS (ENSMUST00000130376.2)	-73	ENSMUST00000130376.2	ENSMUSG00000042197	ENSMUST00000125723			Zfp451			protein_coding
Sox9_E11_Sample1_peak_579	chr1	33906997	33908589	+	232	NA	promoter-TSS (ENSMUST00000062289.10)	protein_coding-promoter-TSS (ENSMUST00000062289.10)	-2	ENSMUST00000129464.7	ENSMUSG00000042182	ENSMUST00000126724			Bend6			protein_coding
Sox9_E11_Sample1_peak_580	chr1	33945104	33945528	+	53	NA	intron (ENSMUST00000183034.4, intron 2 of 102)	protein_coding-intron (ENSMUST00000183034.4, intron 2 of 102)	18369	ENSMUST00000190740.1	ENSMUSG00000099382	ENSMUST00000190740			Gm28631			processed_pseudogene
Sox9_E11_Sample1_peak_581	chr1	34005405	34006552	+	171	NA	promoter-TSS (ENSMUST00000182314.7)	protein_coding-promoter-TSS (ENSMUST00000182314.7)	96	ENSMUST00000182697.7	ENSMUSG00000026131	ENSMUST00000189952			Dst			protein_coding
Sox9_E11_Sample1_peak_582	chr1	34011096	34012117	+	96	NA	promoter-TSS (ENSMUST00000097785.9)	protein_coding-promoter-TSS (ENSMUST00000097785.9)	-207	ENSMUST00000097786.9	ENSMUSG00000026131	ENSMUST00000189952			Dst			protein_coding
Sox9_E11_Sample1_peak_584	chr1	34060502	34061766	+	234	NA	intron (ENSMUST00000097785.9, intron 1 of 97)	protein_coding-intron (ENSMUST00000097785.9, intron 1 of 97)	-16093	ENSMUST00000239001.1	ENSMUSG00000026131	ENSMUST00000189952			Dst			protein_coding
Sox9_E11_Sample1_peak_587	chr1	34104368	34105245	+	68	NA	intron (ENSMUST00000182410.2, intron 1 of 3)	protein_coding-intron (ENSMUST00000182410.2, intron 1 of 3)	-12553	ENSMUST00000198033.1	ENSMUSG00000105982	ENSMUST00000198033			Mir6896			miRNA
Sox9_E11_Sample1_peak_588	chr1	34120742	34121775	+	89	NA	promoter-TSS (ENSMUST00000183006.4)	protein_coding-promoter-TSS (ENSMUST00000183006.4)	8	ENSMUST00000183006.4	ENSMUSG00000026131	ENSMUST00000189952			Dst			protein_coding
Sox9_E11_Sample1_peak_589	chr1	34139720	34140564	+	43	NA	intron (ENSMUST00000115104.9, intron 6 of 97)	protein_coding-intron (ENSMUST00000097785.9, intron 6 of 97)	18892	ENSMUST00000183006.4	ENSMUSG00000026131	ENSMUST00000189952			Dst			protein_coding
Sox9_E11_Sample1_peak_590	chr1	34223778	34224375	+	62	NA	intron (ENSMUST00000097785.9, intron 55 of 97)	protein_coding-intron (ENSMUST00000097785.9, intron 55 of 97)	-12520	ENSMUST00000194192.2	ENSMUSG00000026131	ENSMUST00000189952			Dst			protein_coding
Sox9_E11_Sample1_peak_591	chr1	34236277	34237778	+	203	NA	exon (ENSMUST00000194192.2, exon 1 of 23)	protein_coding-exon (ENSMUST00000194192.2, exon 1 of 23)	431	ENSMUST00000194192.2	ENSMUSG00000026131	ENSMUST00000189952			Dst			protein_coding
Sox9_E11_Sample1_peak_592	chr1	34434054	34435200	+	142	NA	Intergenic	Intergenic	-1363	ENSMUST00000192173.1	ENSMUSG00000102336	ENSMUST00000192173			Gm37233			lncRNA
Sox9_E11_Sample1_peak_593	chr1	34439146	34440285	+	546	NA	promoter-TSS (ENSMUST00000027303.13)	protein_coding-promoter-TSS (ENSMUST00000027303.13)	-43	ENSMUST00000042493.9	ENSMUSG00000042111	ENSMUST00000188583			Ccdc115			protein_coding
Sox9_E11_Sample1_peak_594	chr1	34459272	34460371	+	228	NA	promoter-TSS (ENSMUST00000027302.13)	protein_coding-promoter-TSS (ENSMUST00000027302.13)	29	ENSMUST00000188884.2	ENSMUSG00000026126	ENSMUST00000188019			Ptpn18			protein_coding
Sox9_E11_Sample1_peak_595	chr1	34472619	34473466	+	160	NA	promoter-TSS (ENSMUST00000185881.1)	lncRNA-promoter-TSS (ENSMUST00000185881.1)	70	ENSMUST00000185881.1	ENSMUSG00000100280	ENSMUST00000185218			Gm28417			lncRNA
Sox9_E11_Sample1_peak_596	chr1	34485660	34486211	+	68	NA	promoter-TSS (ENSMUST00000186117.1)	lncRNA-promoter-TSS (ENSMUST00000186117.1)	-2	ENSMUST00000186117.1	ENSMUSG00000101223	ENSMUST00000186117			4930568A12Rik			lncRNA
Sox9_E11_Sample1_peak_597	chr1	34536386	34537491	+	145	NA	intron (ENSMUST00000027298.4, intron 3 of 5)	protein_coding-intron (ENSMUST00000027298.4, intron 3 of 5)	1290	ENSMUST00000027298.4	ENSMUSG00000026124	ENSMUST00000027298			Cfc1			protein_coding
Sox9_E11_Sample1_peak_598	chr1	34579045	34579928	+	113	NA	promoter-TSS (ENSMUST00000052670.10)	protein_coding-promoter-TSS (ENSMUST00000052670.10)	127	ENSMUST00000062557.3	ENSMUSG00000045815	ENSMUST00000062557			1700101I19Rik			lncRNA
Sox9_E11_Sample1_peak_599	chr1	34601942	34602538	+	60	NA	Intergenic	Intergenic	5479	ENSMUST00000186179.1	ENSMUSG00000100524	ENSMUST00000186179			Gm28418			processed_pseudogene
Sox9_E11_Sample1_peak_600	chr1	34677581	34678980	+	196	NA	promoter-TSS (ENSMUST00000159747.8)	protein_coding-promoter-TSS (ENSMUST00000159747.8)	92	ENSMUST00000159747.8	ENSMUSG00000037509	ENSMUST00000160855			Arhgef4			protein_coding
Sox9_E11_Sample1_peak_601	chr1	34738517	34739308	+	142	NA	intron (ENSMUST00000162599.7, intron 1 of 10)	protein_coding-intron (ENSMUST00000159747.8, intron 3 of 13)	6797	ENSMUST00000162599.7	ENSMUSG00000037509	ENSMUST00000160855			Arhgef4			protein_coding
Sox9_E11_Sample1_peak_602	chr1	34749904	34751449	+	101	NA	promoter-TSS (ENSMUST00000159021.8)	protein_coding-promoter-TSS (ENSMUST00000159021.8)	95	ENSMUST00000159021.8	ENSMUSG00000037509	ENSMUST00000160855			Arhgef4			protein_coding
Sox9_E11_Sample1_peak_603	chr1	34783448	34783963	+	53	NA	intron (ENSMUST00000159021.8, intron 1 of 5)	protein_coding-intron (ENSMUST00000159021.8, intron 1 of 5)	-17999	ENSMUST00000047664.15	ENSMUSG00000037509	ENSMUST00000160855			Arhgef4			protein_coding
Sox9_E11_Sample1_peak_604	chr1	34793426	34794088	+	131	NA	intron (ENSMUST00000159021.8, intron 2 of 5)	protein_coding-intron (ENSMUST00000159021.8, intron 2 of 5)	-7947	ENSMUST00000047664.15	ENSMUSG00000037509	ENSMUST00000160855			Arhgef4			protein_coding
Sox9_E11_Sample1_peak_605	chr1	34801470	34802513	+	284	NA	TTS (ENSMUST00000211073.1)	protein_coding-TTS (ENSMUST00000211073.1)	197	ENSMUST00000211073.1	ENSMUSG00000118272	ENSMUST00000211073			Arhgef4			protein_coding
Sox9_E11_Sample1_peak_606	chr1	34842477	34843498	+	307	NA	promoter-TSS (ENSMUST00000047534.11)	protein_coding-promoter-TSS (ENSMUST00000047534.11)	-2	ENSMUST00000185469.6	ENSMUSG00000037503	ENSMUST00000185279			Fam168b			protein_coding
Sox9_E11_Sample1_peak_607	chr1	34849743	34850738	+	194	NA	intron (ENSMUST00000027297.10, intron 1 of 7)	protein_coding-intron (ENSMUST00000027297.10, intron 1 of 7)	248	ENSMUST00000027297.10	ENSMUSG00000026123	ENSMUST00000152654			Plekhb2			protein_coding
Sox9_E11_Sample1_peak_608	chr1	34864209	34864697	+	35	NA	TTS (ENSMUST00000152654.2)	protein_coding-TTS (ENSMUST00000152654.2)	12616	ENSMUST00000152654.2	ENSMUSG00000026123	ENSMUST00000152654			Plekhb2			protein_coding
Sox9_E11_Sample1_peak_610	chr1	34877522	34877984	+	39	NA	promoter-TSS (ENSMUST00000191722.1)	protein_coding-promoter-TSS (ENSMUST00000191722.1)	97	ENSMUST00000191722.1	ENSMUSG00000026123	ENSMUST00000152654			Plekhb2			protein_coding
Sox9_E11_Sample1_peak_611	chr1	34891575	34892022	+	39	NA	Intergenic	Intergenic	14142	ENSMUST00000191722.1	ENSMUSG00000026123	ENSMUST00000152654			Plekhb2			protein_coding
Sox9_E11_Sample1_peak_613	chr1	35813921	35814919	+	150	NA	Intergenic	Intergenic	7446	ENSMUST00000187528.1	ENSMUSG00000101714	ENSMUST00000187528			Gm28415			lncRNA
Sox9_E11_Sample1_peak_614	chr1	35824294	35825914	+	71	NA	Intergenic	Intergenic	18130	ENSMUST00000187528.1	ENSMUSG00000101714	ENSMUST00000187528			Gm28415			lncRNA
Sox9_E11_Sample1_peak_616	chr1	36016892	36017831	+	111	NA	Intergenic	Intergenic	6289	ENSMUST00000192017.1	ENSMUSG00000104201	ENSMUST00000192017			4930535G08Rik			lncRNA
Sox9_E11_Sample1_peak_617	chr1	36060021	36060838	+	129	NA	Intergenic	Intergenic	-7971	ENSMUST00000088174.3	ENSMUSG00000045216	ENSMUST00000088174			Hs6st1			protein_coding
Sox9_E11_Sample1_peak_618	chr1	36065109	36065556	+	57	NA	Intergenic	Intergenic	-3068	ENSMUST00000088174.3	ENSMUSG00000045216	ENSMUST00000088174			Hs6st1			protein_coding
Sox9_E11_Sample1_peak_619	chr1	36068205	36070268	+	102	NA	intron (ENSMUST00000088174.3, intron 1 of 1)	protein_coding-intron (ENSMUST00000088174.3, intron 1 of 1)	836	ENSMUST00000088174.3	ENSMUSG00000045216	ENSMUST00000088174			Hs6st1			protein_coding
Sox9_E11_Sample1_peak_622	chr1	36243650	36244647	+	165	NA	promoter-TSS (ENSMUST00000174266.7)	protein_coding-promoter-TSS (ENSMUST00000174266.7)	13	ENSMUST00000174266.7	ENSMUSG00000037470	ENSMUST00000046875			Uggt1			protein_coding
Sox9_E11_Sample1_peak_623	chr1	36269439	36269870	+	73	NA	exon (ENSMUST00000056946.7, exon 2 of 4)	protein_coding-exon (ENSMUST00000056946.7, exon 2 of 4)	3781	ENSMUST00000056946.7	ENSMUSG00000047180	ENSMUST00000188666			Neurl3			protein_coding
Sox9_E11_Sample1_peak_624	chr1	36307428	36308758	+	191	NA	exon (ENSMUST00000192874.1, exon 1 of 1)	protein_coding-exon (ENSMUST00000192874.1, exon 1 of 1)	314	ENSMUST00000140218.1	ENSMUSG00000037447	ENSMUST00000140218			Arid5a			protein_coding
Sox9_E11_Sample1_peak_625	chr1	36323439	36324498	+	144	NA	TTS (ENSMUST00000115029.1)	protein_coding-TTS (ENSMUST00000115029.1)	6941	ENSMUST00000141121.1	ENSMUSG00000037447	ENSMUST00000140218			Arid5a			protein_coding
Sox9_E11_Sample1_peak_626	chr1	36368295	36369326	+	219	NA	promoter-TSS (ENSMUST00000186470.1)	protein_coding-promoter-TSS (ENSMUST00000186470.1)	292	ENSMUST00000188957.1	ENSMUSG00000010453	ENSMUST00000010597			Kansl3			protein_coding
Sox9_E11_Sample1_peak_627	chr1	36444606	36445644	+	405	NA	exon (ENSMUST00000001171.12, exon 1 of 7)	protein_coding-exon (ENSMUST00000001171.12, exon 1 of 7)	132	ENSMUST00000193502.1	ENSMUSG00000001143	ENSMUST00000123583			Lman2l			protein_coding
Sox9_E11_Sample1_peak_628	chr1	36471167	36472198	+	237	NA	promoter-TSS (ENSMUST00000153128.1)	protein_coding-promoter-TSS (ENSMUST00000153128.1)	62	ENSMUST00000153128.1	ENSMUSG00000037408	ENSMUST00000153128			Cnnm4			protein_coding
Sox9_E11_Sample1_peak_629	chr1	36511495	36512772	+	500	NA	promoter-TSS (ENSMUST00000154225.1)	protein_coding-promoter-TSS (ENSMUST00000154225.1)	266	ENSMUST00000097776.3	ENSMUSG00000001138	ENSMUST00000154225			Cnnm3			protein_coding
Sox9_E11_Sample1_peak_630	chr1	36546740	36547800	+	212	NA	promoter-TSS (ENSMUST00000194894.3)	protein_coding-promoter-TSS (ENSMUST00000194894.3)	-39	ENSMUST00000194894.3	ENSMUSG00000079610	ENSMUST00000194894			Ankrd39			protein_coding
Sox9_E11_Sample1_peak_631	chr1	36556587	36558895	+	253	NA	promoter-TSS (ENSMUST00000149224.2)	lncRNA-promoter-TSS (ENSMUST00000149224.2)	40	ENSMUST00000194426.1	ENSMUSG00000087589	ENSMUST00000149224			D430040D24Rik			lncRNA
Sox9_E11_Sample1_peak_632	chr1	36580079	36580933	+	264	NA	intron (ENSMUST00000170295.7, intron 11 of 14)	protein_coding-intron (ENSMUST00000170295.7, intron 11 of 14)	7181	ENSMUST00000193155.5	ENSMUSG00000046337	ENSMUST00000114981			Fam178b			protein_coding
Sox9_E11_Sample1_peak_633	chr1	36587428	36587473	+	23	NA	intron (ENSMUST00000194839.5, intron 2 of 5)	protein_coding-intron (ENSMUST00000195729.1, intron 2 of 4)	237	ENSMUST00000193155.5	ENSMUSG00000046337	ENSMUST00000114981			Fam178b			protein_coding
Sox9_E11_Sample1_peak_636	chr1	36665105	36665851	+	102	NA	intron (ENSMUST00000114981.2, intron 1 of 9)	protein_coding-intron (ENSMUST00000114981.2, intron 1 of 9)	1513	ENSMUST00000104746.1	ENSMUSG00000077939	ENSMUST00000104746			Gm24133			miRNA
Sox9_E11_Sample1_peak_638	chr1	36691201	36692077	+	142	NA	promoter-TSS (ENSMUST00000191790.5)	protein_coding-promoter-TSS (ENSMUST00000191790.5)	-3	ENSMUST00000192859.1	ENSMUSG00000061518	ENSMUST00000195151			Cox5b			protein_coding
Sox9_E11_Sample1_peak_639	chr1	36709166	36710165	+	461	NA	promoter-TSS (ENSMUST00000159448.7)	protein_coding-promoter-TSS (ENSMUST00000159448.7)	13	ENSMUST00000159448.7	ENSMUSG00000037351	ENSMUST00000160084			Actr1b			protein_coding
Sox9_E11_Sample1_peak_640	chr1	36744402	36744754	+	39	NA	exon (ENSMUST00000193459.2, exon 2 of 4)	protein_coding-exon (ENSMUST00000193459.2, exon 2 of 4)	214	ENSMUST00000193853.1	ENSMUSG00000104237	ENSMUST00000193853			Gm33533			lncRNA
Sox9_E11_Sample1_peak_641	chr1	36784786	36785699	+	227	NA	Intergenic	Intergenic	6258	ENSMUST00000190128.1	ENSMUSG00000026117	ENSMUST00000185871			Zap70			protein_coding
Sox9_E11_Sample1_peak_642	chr1	36870824	36872018	+	68	NA	TTS (ENSMUST00000192008.1)	TEC-TTS (ENSMUST00000192008.1)	624	ENSMUST00000192008.1	ENSMUSG00000103016	ENSMUST00000192008			Gm37506			TEC
Sox9_E11_Sample1_peak_643	chr1	36920061	36920790	+	46	NA	intron (ENSMUST00000185964.2, intron 1 of 5)	protein_coding-intron (ENSMUST00000027290.11, intron 1 of 40)	-3886	ENSMUST00000194317.1	ENSMUSG00000102930	ENSMUST00000194317			Gm38115			lncRNA
Sox9_E11_Sample1_peak_644	chr1	36939055	36940218	+	272	NA	promoter-TSS (ENSMUST00000027290.11)	protein_coding-promoter-TSS (ENSMUST00000027290.11)	-109	ENSMUST00000027290.11	ENSMUSG00000026116	ENSMUST00000191381			Tmem131			protein_coding
Sox9_E11_Sample1_peak_645	chr1	37028874	37029662	+	111	NA	promoter-TSS (ENSMUST00000067178.13)	protein_coding-promoter-TSS (ENSMUST00000067178.13)	-36	ENSMUST00000124404.7	ENSMUSG00000050122	ENSMUST00000067178			Vwa3b			protein_coding
Sox9_E11_Sample1_peak_647	chr1	37299705	37300624	+	227	NA	promoter-TSS (ENSMUST00000132401.7)	protein_coding-promoter-TSS (ENSMUST00000132401.7)	-144	ENSMUST00000132401.7	ENSMUSG00000026113	ENSMUST00000140264			Inpp4a			protein_coding
Sox9_E11_Sample1_peak_648	chr1	37317713	37318201	+	32	NA	intron (ENSMUST00000136846.7, intron 1 of 25)	protein_coding-intron (ENSMUST00000027287.10, intron 1 of 25)	13547	ENSMUST00000192652.1	ENSMUSG00000102879	ENSMUST00000192652			Gm37135			TEC
Sox9_E11_Sample1_peak_649	chr1	37336531	37337488	+	81	NA	intron (ENSMUST00000136846.7, intron 1 of 25)	protein_coding-intron (ENSMUST00000027287.10, intron 1 of 25)	-2837	ENSMUST00000141402.1	ENSMUSG00000086064	ENSMUST00000141402			4930439A04Rik			lncRNA
Sox9_E11_Sample1_peak_650	chr1	37350654	37351682	+	104	NA	intron (ENSMUST00000136846.7, intron 1 of 25)	protein_coding-intron (ENSMUST00000027287.10, intron 1 of 25)	-6229	ENSMUST00000193774.5	ENSMUSG00000026113	ENSMUST00000140264			Inpp4a			protein_coding
Sox9_E11_Sample1_peak_651	chr1	37398955	37399763	+	60	NA	exon (ENSMUST00000140264.7, exon 24 of 24)	protein_coding-exon (ENSMUST00000140264.7, exon 24 of 24)	21687	ENSMUST00000123124.1	ENSMUSG00000026113	ENSMUST00000140264			Inpp4a			protein_coding
Sox9_E11_Sample1_peak_652	chr1	37429498	37430659	+	304	NA	promoter-TSS (ENSMUST00000027285.12)	protein_coding-promoter-TSS (ENSMUST00000027285.12)	25	ENSMUST00000027286.6	ENSMUSG00000026112	ENSMUST00000027286			Coa5			protein_coding
Sox9_E11_Sample1_peak_653	chr1	37540370	37541408	+	200	NA	intron (ENSMUST00000151952.7, intron 1 of 15)	protein_coding-intron (ENSMUST00000151952.7, intron 1 of 15)	127	ENSMUST00000151952.7	ENSMUSG00000026110	ENSMUST00000151952			Mgat4a			protein_coding
Sox9_E11_Sample1_peak_654	chr1	37614948	37616430	+	117	NA	TTS (ENSMUST00000160659.1)	lncRNA-TTS (ENSMUST00000160659.1)	1430	ENSMUST00000160659.1	ENSMUSG00000089767	ENSMUST00000160659			4930556I23Rik			lncRNA
Sox9_E11_Sample1_peak_655	chr1	37665833	37667220	+	161	NA	intron (ENSMUST00000162875.7, intron 1 of 9)	protein_coding-intron (ENSMUST00000160589.1, intron 2 of 3)	5804	ENSMUST00000192005.1	ENSMUSG00000104365	ENSMUST00000192005			4930470B04Rik			TEC
Sox9_E11_Sample1_peak_656	chr1	37687017	37688197	+	98	NA	intron (ENSMUST00000160589.1, intron 1 of 3)	protein_coding-intron (ENSMUST00000160589.1, intron 1 of 3)	9057	ENSMUST00000192480.1	ENSMUSG00000102650	ENSMUST00000192480			Gm19863			TEC
Sox9_E11_Sample1_peak_657	chr1	37694461	37694992	+	104	NA	exon (ENSMUST00000192480.1, exon 1 of 1)	TEC-exon (ENSMUST00000192480.1, exon 1 of 1)	1938	ENSMUST00000192480.1	ENSMUSG00000102650	ENSMUST00000192480			Gm19863			TEC
Sox9_E11_Sample1_peak_658	chr1	37718637	37720378	+	152	NA	intron (ENSMUST00000160589.1, intron 1 of 3)	protein_coding-intron (ENSMUST00000160589.1, intron 1 of 3)	288	ENSMUST00000160589.1	ENSMUSG00000026090	ENSMUST00000162875			2010300C02Rik			protein_coding
Sox9_E11_Sample1_peak_659	chr1	37864540	37865606	+	430	NA	promoter-TSS (ENSMUST00000041815.14)	protein_coding-promoter-TSS (ENSMUST00000041815.14)	0	ENSMUST00000155852.6	ENSMUSG00000060771	ENSMUST00000041815			Tsga10			protein_coding
Sox9_E11_Sample1_peak_660	chr1	37871725	37872858	+	221	NA	promoter-TSS (ENSMUST00000041621.4)	protein_coding-promoter-TSS (ENSMUST00000041621.4)	-83	ENSMUST00000142670.1	ENSMUSG00000037216	ENSMUST00000144440			Lipt1			protein_coding
Sox9_E11_Sample1_peak_661	chr1	37889790	37891165	+	173	NA	promoter-TSS (ENSMUST00000027256.11)	protein_coding-promoter-TSS (ENSMUST00000027256.11)	0	ENSMUST00000027256.11	ENSMUSG00000026087	ENSMUST00000195373			Mrpl30			protein_coding
Sox9_E11_Sample1_peak_662	chr1	37971674	37972059	+	39	NA	Intergenic	Intergenic	-2101	ENSMUST00000158516.1	ENSMUSG00000089141	ENSMUST00000158516			Gm23409			misc_RNA
Sox9_E11_Sample1_peak_663	chr1	37996935	37998592	+	348	NA	promoter-TSS (ENSMUST00000027252.7)	protein_coding-promoter-TSS (ENSMUST00000027252.7)	130	ENSMUST00000195247.5	ENSMUSG00000058407	ENSMUST00000192960			Txndc9			protein_coding
Sox9_E11_Sample1_peak_664	chr1	38128752	38130562	+	171	NA	promoter-TSS (ENSMUST00000027251.11)	protein_coding-promoter-TSS (ENSMUST00000027251.11)	5	ENSMUST00000027251.11	ENSMUSG00000026082	ENSMUST00000027251			Rev1			protein_coding
Sox9_E11_Sample1_peak_665	chr1	38358034	38358679	+	85	NA	intron (ENSMUST00000095027.8, intron 5 of 21)	protein_coding-intron (ENSMUST00000027250.13, intron 6 of 7)	-26593	ENSMUST00000143261.7	ENSMUSG00000087131	ENSMUST00000131663			Gm16152			lncRNA
Sox9_E11_Sample1_peak_666	chr1	38393166	38393767	+	60	NA	intron (ENSMUST00000143261.7, intron 4 of 4)	protein_coding-intron (ENSMUST00000027250.13, intron 6 of 7)	4637	ENSMUST00000131663.1	ENSMUSG00000087131	ENSMUST00000131663			Gm16152			lncRNA
Sox9_E11_Sample1_peak_667	chr1	38626534	38628066	+	204	NA	promoter-TSS (ENSMUST00000095027.8)	protein_coding-promoter-TSS (ENSMUST00000095027.8)	-99	ENSMUST00000238906.1	ENSMUSG00000037138	ENSMUST00000027250			Aff3			protein_coding
Sox9_E11_Sample1_peak_668	chr1	38767180	38768025	+	76	NA	TTS (ENSMUST00000192930.1)	TEC-TTS (ENSMUST00000192930.1)	418	ENSMUST00000192930.1	ENSMUSG00000103531	ENSMUST00000192930			2610300A13Rik			TEC
Sox9_E11_Sample1_peak_669	chr1	38835134	38836787	+	184	NA	exon (ENSMUST00000147695.8, exon 1 of 12)	protein_coding-exon (ENSMUST00000147695.8, exon 1 of 12)	414	ENSMUST00000191724.1	ENSMUSG00000048814	ENSMUST00000191724			Lonrf2			protein_coding
Sox9_E11_Sample1_peak_670	chr1	38897460	38898237	+	220	NA	intron (ENSMUST00000193435.5, intron 1 of 4)	protein_coding-intron (ENSMUST00000027249.11, intron 1 of 6)	138	ENSMUST00000192175.1	ENSMUSG00000026080	ENSMUST00000194361			Chst10			protein_coding
Sox9_E11_Sample1_peak_671	chr1	38987190	38988493	+	304	NA	promoter-TSS (ENSMUST00000193489.1)	protein_coding-promoter-TSS (ENSMUST00000193489.1)	0	ENSMUST00000193489.1	ENSMUSG00000026078	ENSMUST00000194552			Pdcl3			protein_coding
Sox9_E11_Sample1_peak_673	chr1	39192706	39194716	+	91	NA	promoter-TSS (ENSMUST00000056815.8)	protein_coding-promoter-TSS (ENSMUST00000056815.8)	-20	ENSMUST00000173050.7	ENSMUSG00000026077	ENSMUST00000056815			Npas2			protein_coding
Sox9_E11_Sample1_peak_674	chr1	39281388	39281866	+	46	NA	intron (ENSMUST00000056815.8, intron 2 of 20)	protein_coding-intron (ENSMUST00000056815.8, intron 2 of 20)	-5062	ENSMUST00000174365.1	ENSMUSG00000092553	ENSMUST00000174365			Gm20428			processed_pseudogene
Sox9_E11_Sample1_peak_675	chr1	39292033	39292506	+	120	NA	intron (ENSMUST00000056815.8, intron 3 of 20)	protein_coding-intron (ENSMUST00000056815.8, intron 3 of 20)	-15704	ENSMUST00000174365.1	ENSMUSG00000092553	ENSMUST00000174365			Gm20428			processed_pseudogene
Sox9_E11_Sample1_peak_676	chr1	39335679	39336259	+	144	NA	intron (ENSMUST00000056815.8, intron 14 of 20)	protein_coding-intron (ENSMUST00000056815.8, intron 14 of 20)	-5586	ENSMUST00000172825.1	ENSMUSG00000026077	ENSMUST00000056815			Npas2			protein_coding
Sox9_E11_Sample1_peak_677	chr1	39340269	39340896	+	81	NA	promoter-TSS (ENSMUST00000172825.1)	protein_coding-promoter-TSS (ENSMUST00000172825.1)	-973	ENSMUST00000172825.1	ENSMUSG00000026077	ENSMUST00000056815			Npas2			protein_coding
Sox9_E11_Sample1_peak_678	chr1	39367332	39368828	+	218	NA	promoter-TSS (ENSMUST00000195123.5)	protein_coding-promoter-TSS (ENSMUST00000195123.5)	-69	ENSMUST00000195123.5	ENSMUSG00000073702	ENSMUST00000086535			Rpl31			protein_coding
Sox9_E11_Sample1_peak_679	chr1	39392417	39394399	+	59	NA	promoter-TSS (ENSMUST00000195854.1)	protein_coding-promoter-TSS (ENSMUST00000195854.1)	-777	ENSMUST00000195854.1	ENSMUSG00000003134	ENSMUST00000193823			Tbc1d8			protein_coding
Sox9_E11_Sample1_peak_680	chr1	39408688	39409590	+	71	NA	intron (ENSMUST00000054462.10, intron 2 of 19)	protein_coding-intron (ENSMUST00000054462.10, intron 2 of 19)	10793	ENSMUST00000191698.1	ENSMUSG00000102607	ENSMUST00000191698			Gm37265			TEC
Sox9_E11_Sample1_peak_682	chr1	39445304	39446156	+	46	NA	intron (ENSMUST00000193823.1, intron 1 of 18)	protein_coding-intron (ENSMUST00000054462.10, intron 1 of 19)	-25798	ENSMUST00000191698.1	ENSMUSG00000102607	ENSMUST00000191698			Gm37265			TEC
Sox9_E11_Sample1_peak_683	chr1	39477818	39479152	+	252	NA	exon (ENSMUST00000054462.10, exon 1 of 20)	protein_coding-exon (ENSMUST00000054462.10, exon 1 of 20)	176	ENSMUST00000192531.5	ENSMUSG00000003134	ENSMUST00000193823			Tbc1d8			protein_coding
Sox9_E11_Sample1_peak_684	chr1	39535394	39536287	+	348	NA	promoter-TSS (ENSMUST00000003219.13)	protein_coding-promoter-TSS (ENSMUST00000003219.13)	38	ENSMUST00000003219.13	ENSMUSG00000003135	ENSMUST00000160145			Cnot11			protein_coding
Sox9_E11_Sample1_peak_685	chr1	39551972	39552998	+	111	NA	promoter-TSS (ENSMUST00000146314.1)	lncRNA-promoter-TSS (ENSMUST00000146314.1)	-483	ENSMUST00000146314.1	ENSMUSG00000085894	ENSMUST00000146314			Gm15832			lncRNA
Sox9_E11_Sample1_peak_686	chr1	39576492	39577561	+	230	NA	exon (ENSMUST00000062525.10, exon 1 of 7)	protein_coding-exon (ENSMUST00000062525.10, exon 1 of 7)	277	ENSMUST00000195705.1	ENSMUSG00000048234	ENSMUST00000062525			Rnf149			protein_coding
Sox9_E11_Sample1_peak_687	chr1	39636652	39636862	+	32	NA	intron (ENSMUST00000053355.5, intron 2 of 3)	protein_coding-intron (ENSMUST00000053355.5, intron 2 of 3)	-13419	ENSMUST00000181841.1	ENSMUSG00000097083	ENSMUST00000181841			D930019O06Rik			lncRNA
Sox9_E11_Sample1_peak_688	chr1	39650188	39651261	+	160	NA	exon (ENSMUST00000053355.5, exon 1 of 4)	protein_coding-exon (ENSMUST00000053355.5, exon 1 of 4)	548	ENSMUST00000181841.1	ENSMUSG00000097083	ENSMUST00000181841			D930019O06Rik			lncRNA
Sox9_E11_Sample1_peak_689	chr1	39670376	39670910	+	76	NA	intron (ENSMUST00000151913.2, intron 13 of 14)	protein_coding-intron (ENSMUST00000151913.2, intron 13 of 14)	-19169	ENSMUST00000053355.5	ENSMUSG00000050967	ENSMUST00000053355			Creg2			protein_coding
Sox9_E11_Sample1_peak_690	chr1	39678783	39679547	+	68	NA	intron (ENSMUST00000151913.2, intron 11 of 14)	protein_coding-intron (ENSMUST00000151913.2, intron 11 of 14)	12706	ENSMUST00000126760.1	ENSMUSG00000057173	ENSMUST00000126760			Rfx8			protein_coding
Sox9_E11_Sample1_peak_691	chr1	39695124	39695606	+	40	NA	intron (ENSMUST00000151913.2, intron 5 of 14)	protein_coding-intron (ENSMUST00000151913.2, intron 5 of 14)	-3494	ENSMUST00000126760.1	ENSMUSG00000057173	ENSMUST00000126760			Rfx8			protein_coding
Sox9_E11_Sample1_peak_692	chr1	39700591	39703208	+	58	NA	intron (ENSMUST00000151913.2, intron 4 of 14)	protein_coding-intron (ENSMUST00000151913.2, intron 4 of 14)	-10028	ENSMUST00000126760.1	ENSMUSG00000057173	ENSMUST00000126760			Rfx8			protein_coding
Sox9_E11_Sample1_peak_693	chr1	39720750	39721173	+	46	NA	promoter-TSS (ENSMUST00000151913.2)	protein_coding-promoter-TSS (ENSMUST00000151913.2)	36	ENSMUST00000151913.2	ENSMUSG00000057173	ENSMUST00000126760			Rfx8			protein_coding
Sox9_E11_Sample1_peak_694	chr1	39755971	39756653	+	55	NA	Intergenic	Intergenic	-35315	ENSMUST00000151913.2	ENSMUSG00000057173	ENSMUST00000126760			Rfx8			protein_coding
Sox9_E11_Sample1_peak_695	chr1	39761603	39762212	+	90	NA	Intergenic	Intergenic	-40910	ENSMUST00000151913.2	ENSMUSG00000057173	ENSMUST00000126760			Rfx8			protein_coding
Sox9_E11_Sample1_peak_696	chr1	39779355	39779879	+	68	NA	Intergenic	Intergenic	25715	ENSMUST00000171319.3	ENSMUSG00000091937	ENSMUST00000171319			Gm3646			protein_coding
Sox9_E11_Sample1_peak_697	chr1	39812475	39813235	+	54	NA	Intergenic	Intergenic	-7523	ENSMUST00000171319.3	ENSMUSG00000091937	ENSMUST00000171319			Gm3646			protein_coding
Sox9_E11_Sample1_peak_698	chr1	39832227	39832356	+	68	NA	Intergenic	Intergenic	13408	ENSMUST00000187091.6	ENSMUSG00000101634	ENSMUST00000186683			1700066B17Rik			lncRNA
Sox9_E11_Sample1_peak_700	chr1	39900326	39901895	+	149	NA	promoter-TSS (ENSMUST00000191761.5)	protein_coding-promoter-TSS (ENSMUST00000191761.5)	-60	ENSMUST00000193661.1	ENSMUSG00000026074	ENSMUST00000193661			Map4k4			protein_coding
Sox9_E11_Sample1_peak_702	chr1	39935946	39936709	+	90	NA	intron (ENSMUST00000168431.6, intron 2 of 29)	protein_coding-intron (ENSMUST00000163854.8, intron 2 of 30)	-27828	ENSMUST00000193514.6	ENSMUSG00000026074	ENSMUST00000193661			Map4k4			protein_coding
Sox9_E11_Sample1_peak_704	chr1	39956466	39956912	+	93	NA	intron (ENSMUST00000168431.6, intron 2 of 29)	protein_coding-intron (ENSMUST00000163854.8, intron 2 of 30)	-7466	ENSMUST00000193514.6	ENSMUSG00000026074	ENSMUST00000193661			Map4k4			protein_coding
Sox9_E11_Sample1_peak_705	chr1	40062934	40063960	+	173	NA	Intergenic	Intergenic	-10632	ENSMUST00000191671.5	ENSMUSG00000026073	ENSMUST00000027243			Il1r2			protein_coding
Sox9_E11_Sample1_peak_706	chr1	40085480	40085959	+	76	NA	promoter-TSS (ENSMUST00000194913.1)	protein_coding-promoter-TSS (ENSMUST00000194913.1)	132	ENSMUST00000181756.2	ENSMUSG00000097899	ENSMUST00000181756			Gm16894			lncRNA
Sox9_E11_Sample1_peak_709	chr1	40225090	40225635	+	68	NA	intron (ENSMUST00000027241.10, intron 1 of 10)	protein_coding-intron (ENSMUST00000027241.10, intron 1 of 10)	282	ENSMUST00000027241.10	ENSMUSG00000026072	ENSMUST00000195402			Il1r1			protein_coding
Sox9_E11_Sample1_peak_710	chr1	40234127	40234159	+	26	NA	intron (ENSMUST00000027241.10, intron 1 of 10)	protein_coding-intron (ENSMUST00000027241.10, intron 1 of 10)	-3877	ENSMUST00000191850.1	ENSMUSG00000103560	ENSMUST00000191850			Gm38070			TEC
Sox9_E11_Sample1_peak_711	chr1	40254445	40254877	+	53	NA	intron (ENSMUST00000027241.10, intron 1 of 10)	protein_coding-intron (ENSMUST00000027241.10, intron 1 of 10)	-11925	ENSMUST00000114795.2	ENSMUSG00000026072	ENSMUST00000195402			Il1r1			protein_coding
Sox9_E11_Sample1_peak_712	chr1	40266331	40267117	+	123	NA	promoter-TSS (ENSMUST00000195402.1)	protein_coding-promoter-TSS (ENSMUST00000195402.1)	67	ENSMUST00000195402.1	ENSMUSG00000026072	ENSMUST00000195402			Il1r1			protein_coding
Sox9_E11_Sample1_peak_713	chr1	40324775	40326160	+	122	NA	promoter-TSS (ENSMUST00000193388.1)	protein_coding-promoter-TSS (ENSMUST00000193388.1)	-144	ENSMUST00000193388.1	ENSMUSG00000070942	ENSMUST00000193388			Il1rl2			protein_coding
Sox9_E11_Sample1_peak_716	chr1	40665610	40666368	+	40	NA	Intergenic	Intergenic	-14585	ENSMUST00000027231.12	ENSMUSG00000026062	ENSMUST00000027231			Slc9a2			protein_coding
Sox9_E11_Sample1_peak_717	chr1	40680764	40681980	+	179	NA	promoter-TSS (ENSMUST00000192345.1)	protein_coding-promoter-TSS (ENSMUST00000192345.1)	-225	ENSMUST00000192345.1	ENSMUSG00000026062	ENSMUST00000027231			Slc9a2			protein_coding
Sox9_E11_Sample1_peak_718	chr1	40790289	40791083	+	207	NA	promoter-TSS (ENSMUST00000039672.5)	protein_coding-promoter-TSS (ENSMUST00000039672.5)	1	ENSMUST00000131390.7	ENSMUSG00000041945	ENSMUST00000144385			Mfsd9			protein_coding
Sox9_E11_Sample1_peak_720	chr1	41157589	41158481	+	117	NA	Intergenic	Intergenic	23217	ENSMUST00000194002.1	ENSMUSG00000104072	ENSMUST00000194002			4930448I06Rik			lncRNA
Sox9_E11_Sample1_peak_721	chr1	41274727	41275694	+	72	NA	Intergenic	Intergenic	-93958	ENSMUST00000194002.1	ENSMUSG00000104072	ENSMUST00000194002			4930448I06Rik			lncRNA
Sox9_E11_Sample1_peak_722	chr1	41389693	41390846	+	141	NA	Intergenic	Intergenic	139274	ENSMUST00000191087.1	ENSMUSG00000100185	ENSMUST00000191087			Gm28634			lncRNA
Sox9_E11_Sample1_peak_723	chr1	41810462	41810948	+	209	NA	intron (ENSMUST00000186391.1, intron 1 of 5)	lncRNA-intron (ENSMUST00000186391.1, intron 1 of 5)	28897	ENSMUST00000186391.1	ENSMUSG00000100832	ENSMUST00000186391			Gm29260			lncRNA
Sox9_E11_Sample1_peak_724	chr1	42491017	42492104	+	163	NA	promoter-TSS (ENSMUST00000191992.1)	TEC-promoter-TSS (ENSMUST00000191992.1)	-253	ENSMUST00000191992.1	ENSMUSG00000103106	ENSMUST00000191992			Gm37047			TEC
Sox9_E11_Sample1_peak_725	chr1	42539503	42540239	+	76	NA	Intergenic	Intergenic	48058	ENSMUST00000191992.1	ENSMUSG00000103106	ENSMUST00000191992			Gm37047			TEC
Sox9_E11_Sample1_peak_727	chr1	42686158	42686958	+	69	NA	intron (ENSMUST00000188153.6, intron 1 of 2)	lncRNA-intron (ENSMUST00000180689.7, intron 1 of 3)	6535	ENSMUST00000186656.6	ENSMUSG00000060424	ENSMUST00000181660			Pantr1			lncRNA
Sox9_E11_Sample1_peak_728	chr1	42694457	42696691	+	135	NA	promoter-TSS (ENSMUST00000054883.3)	protein_coding-promoter-TSS (ENSMUST00000054883.3)	-194	ENSMUST00000054883.3	ENSMUSG00000045515	ENSMUST00000239323			Pou3f3			protein_coding
Sox9_E11_Sample1_peak_729	chr1	42713407	42714952	+	77	NA	promoter-TSS (ENSMUST00000180589.1)	lncRNA-promoter-TSS (ENSMUST00000180589.1)	-725	ENSMUST00000180589.1	ENSMUSG00000097063	ENSMUST00000192894			Pantr2			lncRNA
Sox9_E11_Sample1_peak_730	chr1	42850876	42852086	+	408	NA	intron (ENSMUST00000188174.6, intron 1 of 3)	protein_coding-intron (ENSMUST00000057208.12, intron 1 of 10)	196	ENSMUST00000188174.6	ENSMUSG00000060679	ENSMUST00000187414			Mrps9			protein_coding
Sox9_E11_Sample1_peak_731	chr1	42878607	42879054	+	39	NA	intron (ENSMUST00000188174.6, intron 2 of 3)	protein_coding-intron (ENSMUST00000057208.12, intron 2 of 10)	-8907	ENSMUST00000201108.3	ENSMUSG00000060679	ENSMUST00000187414			Mrps9			protein_coding
Sox9_E11_Sample1_peak_733	chr1	42952757	42953660	+	182	NA	promoter-TSS (ENSMUST00000179655.1)	protein_coding-promoter-TSS (ENSMUST00000179655.1)	26	ENSMUST00000187998.1	ENSMUSG00000041907	ENSMUST00000188621			Gpr45			protein_coding
Sox9_E11_Sample1_peak_734	chr1	43046745	43047445	+	67	NA	TTS (ENSMUST00000095014.7)	protein_coding-TTS (ENSMUST00000095014.7)	-9172	ENSMUST00000185980.1	ENSMUSG00000100269	ENSMUST00000185980			Gm28782			lncRNA
Sox9_E11_Sample1_peak_735	chr1	43091957	43093069	+	277	NA	promoter-TSS (ENSMUST00000039080.3)	lncRNA-promoter-TSS (ENSMUST00000039080.3)	-50	ENSMUST00000187525.1	ENSMUSG00000070939	ENSMUST00000187525			Tgfbrap1			protein_coding
Sox9_E11_Sample1_peak_736	chr1	43098267	43099212	+	373	NA	promoter-TSS (ENSMUST00000010434.7)	protein_coding-promoter-TSS (ENSMUST00000010434.7)	29	ENSMUST00000010434.7	ENSMUSG00000010290	ENSMUST00000010434			AI597479			protein_coding
Sox9_E11_Sample1_peak_738	chr1	43151710	43153106	+	170	NA	intron (ENSMUST00000187357.1, intron 1 of 2)	protein_coding-intron (ENSMUST00000008280.13, intron 2 of 5)	11553	ENSMUST00000008280.13	ENSMUSG00000008136	ENSMUST00000008280			Fhl2			protein_coding
Sox9_E11_Sample1_peak_739	chr1	43163305	43164382	+	316	NA	exon (ENSMUST00000008280.13, exon 1 of 6)	protein_coding-exon (ENSMUST00000008280.13, exon 1 of 6)	118	ENSMUST00000008280.13	ENSMUSG00000008136	ENSMUST00000008280			Fhl2			protein_coding
Sox9_E11_Sample1_peak_741	chr1	43299375	43299949	+	46	NA	intron (ENSMUST00000189899.1, intron 2 of 5)	lncRNA-intron (ENSMUST00000189899.1, intron 2 of 5)	3263	ENSMUST00000189899.1	ENSMUSG00000099576	ENSMUST00000189899			Gm29040			lncRNA
Sox9_E11_Sample1_peak_742	chr1	43305375	43306787	+	358	NA	Intergenic	Intergenic	-3156	ENSMUST00000189899.1	ENSMUSG00000099576	ENSMUST00000189899			Gm29040			lncRNA
Sox9_E11_Sample1_peak_743	chr1	43361141	43361373	+	85	NA	Intergenic	Intergenic	-48327	ENSMUST00000189199.1	ENSMUSG00000101923	ENSMUST00000189199			Gm29041			processed_pseudogene
Sox9_E11_Sample1_peak_744	chr1	43413323	43414081	+	129	NA	Intergenic	Intergenic	4118	ENSMUST00000189199.1	ENSMUSG00000101923	ENSMUST00000189199			Gm29041			processed_pseudogene
Sox9_E11_Sample1_peak_745	chr1	43445023	43446846	+	481	NA	exon (ENSMUST00000086421.8, exon 1 of 5)	protein_coding-exon (ENSMUST00000086421.8, exon 1 of 5)	183	ENSMUST00000086421.8	ENSMUSG00000066877	ENSMUST00000124817			Nck2			protein_coding
Sox9_E11_Sample1_peak_746	chr1	43463974	43464652	+	52	NA	intron (ENSMUST00000086421.8, intron 1 of 4)	protein_coding-intron (ENSMUST00000086421.8, intron 1 of 4)	7040	ENSMUST00000124817.1	ENSMUSG00000066877	ENSMUST00000124817			Nck2			protein_coding
Sox9_E11_Sample1_peak_747	chr1	43471832	43472842	+	152	NA	intron (ENSMUST00000086421.8, intron 1 of 4)	protein_coding-intron (ENSMUST00000086421.8, intron 1 of 4)	15064	ENSMUST00000124817.1	ENSMUSG00000066877	ENSMUST00000124817			Nck2			protein_coding
Sox9_E11_Sample1_peak_748	chr1	43501087	43501715	+	30	NA	intron (ENSMUST00000086421.8, intron 1 of 4)	protein_coding-intron (ENSMUST00000086421.8, intron 1 of 4)	12954	ENSMUST00000194710.1	ENSMUSG00000103422	ENSMUST00000194710			Gm37536			TEC
Sox9_E11_Sample1_peak_749	chr1	43502439	43502600	+	28	NA	intron (ENSMUST00000086421.8, intron 1 of 4)	protein_coding-intron (ENSMUST00000086421.8, intron 1 of 4)	14072	ENSMUST00000194710.1	ENSMUSG00000103422	ENSMUST00000194710			Gm37536			TEC
Sox9_E11_Sample1_peak_750	chr1	43523470	43524478	+	76	NA	intron (ENSMUST00000187435.6, intron 2 of 2)	protein_coding-intron (ENSMUST00000086421.8, intron 2 of 4)	-8431	ENSMUST00000202540.1	ENSMUSG00000066877	ENSMUST00000124817			Nck2			protein_coding
Sox9_E11_Sample1_peak_751	chr1	43545002	43545339	+	55	NA	intron (ENSMUST00000114744.2, intron 1 of 1)	protein_coding-intron (ENSMUST00000086421.8, intron 3 of 4)	11601	ENSMUST00000114744.2	ENSMUSG00000066877	ENSMUST00000124817			Nck2			protein_coding
Sox9_E11_Sample1_peak_752	chr1	43554949	43556181	+	174	NA	intron (ENSMUST00000086421.8, intron 4 of 4)	protein_coding-intron (ENSMUST00000086421.8, intron 4 of 4)	-4708	ENSMUST00000193169.1	ENSMUSG00000103945	ENSMUST00000193169			Gm38228			TEC
Sox9_E11_Sample1_peak_753	chr1	43562032	43562783	+	199	NA	TTS (ENSMUST00000193169.1)	TEC-TTS (ENSMUST00000193169.1)	2134	ENSMUST00000193169.1	ENSMUSG00000103945	ENSMUST00000193169			Gm38228			TEC
Sox9_E11_Sample1_peak_754	chr1	43698393	43699161	+	132	NA	Intergenic	Intergenic	-31825	ENSMUST00000027217.8	ENSMUSG00000026051	ENSMUST00000027217			Ecrg4			protein_coding
Sox9_E11_Sample1_peak_755	chr1	43730450	43730854	+	53	NA	promoter-TSS (ENSMUST00000027217.8)	protein_coding-promoter-TSS (ENSMUST00000027217.8)	50	ENSMUST00000027217.8	ENSMUSG00000026051	ENSMUST00000027217			Ecrg4			protein_coding
Sox9_E11_Sample1_peak_756	chr1	43783389	43784071	+	84	NA	intron (ENSMUST00000153317.5, intron 1 of 3)	protein_coding-intron (ENSMUST00000076997.12, intron 6 of 14)	-2180	ENSMUST00000163003.1	ENSMUSG00000090243	ENSMUST00000163003			Gm16103			processed_pseudogene
Sox9_E11_Sample1_peak_757	chr1	43826704	43828354	+	513	NA	promoter-TSS (ENSMUST00000136179.7)	protein_coding-promoter-TSS (ENSMUST00000136179.7)	212	ENSMUST00000076997.12	ENSMUSG00000057363	ENSMUST00000126008			Uxs1			protein_coding
Sox9_E11_Sample1_peak_758	chr1	43882357	43882771	+	39	NA	Intergenic	Intergenic	-5487	ENSMUST00000191395.1	ENSMUSG00000100701	ENSMUST00000191395			Gm19587			processed_pseudogene
Sox9_E11_Sample1_peak_759	chr1	43899156	43899576	+	179	NA	TTS (ENSMUST00000189286.1)	processed_pseudogene-TTS (ENSMUST00000189286.1)	1072	ENSMUST00000189286.1	ENSMUSG00000101395	ENSMUST00000189286			Gm8241			processed_pseudogene
Sox9_E11_Sample1_peak_760	chr1	43933265	43934594	+	384	NA	promoter-TSS (ENSMUST00000087933.9)	protein_coding-promoter-TSS (ENSMUST00000087933.9)	-78	ENSMUST00000087933.9	ENSMUSG00000041763	ENSMUST00000187115			Tpp2			protein_coding
Sox9_E11_Sample1_peak_761	chr1	44041687	44042704	+	242	NA	Intergenic	Intergenic	19741	ENSMUST00000168641.1	ENSMUSG00000091844	ENSMUST00000168641			Gm8251			protein_coding
Sox9_E11_Sample1_peak_762	chr1	44101571	44103092	+	496	NA	promoter-TSS (ENSMUST00000027215.11)	protein_coding-promoter-TSS (ENSMUST00000027215.11)	12	ENSMUST00000128190.7	ENSMUSG00000026049	ENSMUST00000147661			Tex30			protein_coding
Sox9_E11_Sample1_peak_763	chr1	44118395	44120250	+	568	NA	promoter-TSS (ENSMUST00000027213.13)	protein_coding-promoter-TSS (ENSMUST00000027213.13)	160	ENSMUST00000035991.7	ENSMUSG00000041684	ENSMUST00000114709			Bivm			protein_coding
Sox9_E11_Sample1_peak_764	chr1	44147219	44148942	+	511	NA	exon (ENSMUST00000027214.3, exon 1 of 15)	protein_coding-exon (ENSMUST00000027214.3, exon 1 of 15)	148	ENSMUST00000145406.1	ENSMUSG00000026048	ENSMUST00000139510			Ercc5			protein_coding
Sox9_E11_Sample1_peak_765	chr1	44198387	44199161	+	116	NA	Intergenic	Intergenic	-13388	ENSMUST00000161563.1	ENSMUSG00000089703	ENSMUST00000161563			Gm15833			processed_pseudogene
Sox9_E11_Sample1_peak_766	chr1	44347832	44348992	+	111	NA	Intergenic	Intergenic	-17376	ENSMUST00000191483.1	ENSMUSG00000100966	ENSMUST00000191483			Gm5700			processed_pseudogene
Sox9_E11_Sample1_peak_767	chr1	44551324	44553002	+	544	NA	promoter-TSS (ENSMUST00000161066.7)	protein_coding-promoter-TSS (ENSMUST00000161066.7)	-434	ENSMUST00000161066.7	ENSMUSG00000056870	ENSMUST00000161793			Gulp1			protein_coding
Sox9_E11_Sample1_peak_768	chr1	44584901	44585327	+	102	NA	intron (ENSMUST00000161066.7, intron 2 of 3)	protein_coding-intron (ENSMUST00000074525.9, intron 1 of 10)	24229	ENSMUST00000194332.1	ENSMUSG00000102319	ENSMUST00000194332			Gm37626			TEC
Sox9_E11_Sample1_peak_769	chr1	44663768	44664637	+	153	NA	intron (ENSMUST00000161066.7, intron 2 of 3)	protein_coding-intron (ENSMUST00000074525.9, intron 1 of 10)	19923	ENSMUST00000160955.1	ENSMUSG00000089877	ENSMUST00000160955			Gm16102			processed_pseudogene
Sox9_E11_Sample1_peak_770	chr1	44825695	44826246	+	219	NA	Intergenic	Intergenic	-13201	ENSMUST00000190083.1	ENSMUSG00000100434	ENSMUST00000190083			Gm3489			processed_pseudogene
Sox9_E11_Sample1_peak_773	chr1	45501653	45503276	+	159	NA	intron (ENSMUST00000086430.4, intron 1 of 53)	protein_coding-intron (ENSMUST00000086430.4, intron 1 of 53)	818	ENSMUST00000134681.7	ENSMUSG00000026042	ENSMUST00000134681			Col5a2			protein_coding
Sox9_E11_Sample1_peak_774	chr1	45580350	45581105	+	172	NA	Intergenic	Intergenic	-21299	ENSMUST00000185744.1	ENSMUSG00000100894	ENSMUST00000185744			Gm8304			processed_pseudogene
Sox9_E11_Sample1_peak_776	chr1	45761215	45761641	+	18	NA	Intergenic	Intergenic	-6909	ENSMUST00000187682.1	ENSMUSG00000100843	ENSMUST00000187682			Gm8307			processed_pseudogene
Sox9_E11_Sample1_peak_778	chr1	45780549	45781645	+	227	NA	Intergenic	Intergenic	8135	ENSMUST00000157139.1	ENSMUSG00000087764	ENSMUST00000157139			Gm23984			ribozyme
Sox9_E11_Sample1_peak_779	chr1	45794799	45796136	+	457	NA	promoter-TSS (ENSMUST00000142145.1)	protein_coding-promoter-TSS (ENSMUST00000142145.1)	18	ENSMUST00000154436.7	ENSMUSG00000025995	ENSMUST00000186308			Wdr75			protein_coding
Sox9_E11_Sample1_peak_781	chr1	45865937	45867120	+	152	NA	Intergenic	Intergenic	-8774	ENSMUST00000153604.1	ENSMUSG00000084817	ENSMUST00000153604			Gm5526			processed_pseudogene
Sox9_E11_Sample1_peak_782	chr1	45887006	45887420	+	26	NA	Intergenic	Intergenic	2865	ENSMUST00000183590.1	ENSMUSG00000098549	ENSMUST00000183590			Gm5269			protein_coding
Sox9_E11_Sample1_peak_783	chr1	45913140	45913843	+	87	NA	intron (ENSMUST00000027137.10, intron 5 of 7)	protein_coding-intron (ENSMUST00000027137.10, intron 5 of 7)	7868	ENSMUST00000190055.1	ENSMUSG00000099381	ENSMUST00000190055			Gm18303			processed_pseudogene
Sox9_E11_Sample1_peak_784	chr1	45924992	45926636	+	807	NA	promoter-TSS (ENSMUST00000027137.10)	protein_coding-promoter-TSS (ENSMUST00000027137.10)	-205	ENSMUST00000191247.6	ENSMUSG00000025993	ENSMUST00000027137			Slc40a1			protein_coding
Sox9_E11_Sample1_peak_785	chr1	45985795	45986792	+	124	NA	Intergenic	Intergenic	4745	ENSMUST00000085632.3	ENSMUSG00000070896	ENSMUST00000085632			Rpl23a-ps1			processed_pseudogene
Sox9_E11_Sample1_peak_788	chr1	46018569	46019276	+	73	NA	Intergenic	Intergenic	-6902	ENSMUST00000182781.1	ENSMUSG00000090682	ENSMUST00000182781			Gm3852			processed_pseudogene
Sox9_E11_Sample1_peak_789	chr1	46066322	46067472	+	520	NA	promoter-TSS (ENSMUST00000238212.1)	protein_coding-promoter-TSS (ENSMUST00000238212.1)	44	ENSMUST00000238212.1	ENSMUSG00000041144	ENSMUST00000238212			Dnah7b			protein_coding
Sox9_E11_Sample1_peak_790	chr1	46425060	46425834	+	118	NA	promoter-TSS (ENSMUST00000189749.6)	protein_coding-promoter-TSS (ENSMUST00000189749.6)	-145	ENSMUST00000189749.6	ENSMUSG00000101337	ENSMUST00000187094			Dnah7c			protein_coding
Sox9_E11_Sample1_peak_792	chr1	46852442	46854326	+	466	NA	intron (ENSMUST00000186852.1, intron 1 of 1)	protein_coding-intron (ENSMUST00000027131.5, intron 1 of 9)	662	ENSMUST00000027131.5	ENSMUSG00000025986	ENSMUST00000027131			Slc39a10			protein_coding
Sox9_E11_Sample1_peak_793	chr1	46863116	46864188	+	209	NA	intron (ENSMUST00000186852.1, intron 1 of 1)	protein_coding-intron (ENSMUST00000185520.1, intron 1 of 1)	-9606	ENSMUST00000027131.5	ENSMUSG00000025986	ENSMUST00000027131			Slc39a10			protein_coding
Sox9_E11_Sample1_peak_794	chr1	46885301	46888836	+	269	NA	intron (ENSMUST00000186852.1, intron 1 of 1)	protein_coding-intron (ENSMUST00000185520.1, intron 1 of 1)	1002	ENSMUST00000185520.1	ENSMUSG00000025986	ENSMUST00000027131			Slc39a10			protein_coding
Sox9_E11_Sample1_peak_795	chr1	46894368	46894722	+	31	NA	Intergenic	Intergenic	-1693	ENSMUST00000186852.1	ENSMUSG00000025986	ENSMUST00000027131			Slc39a10			protein_coding
Sox9_E11_Sample1_peak_798	chr1	47629466	47630155	+	53	NA	Intergenic	Intergenic	23814	ENSMUST00000194762.1	ENSMUSG00000104067	ENSMUST00000194762			Gm37196			TEC
Sox9_E11_Sample1_peak_801	chr1	50682839	50683494	+	42	NA	Intergenic	Intergenic	123404	ENSMUST00000122582.1	ENSMUSG00000084531	ENSMUST00000122582			Gm25843			misc_RNA
Sox9_E11_Sample1_peak_803	chr1	50926620	50928271	+	345	NA	promoter-TSS (ENSMUST00000081851.3)	protein_coding-promoter-TSS (ENSMUST00000081851.3)	-74	ENSMUST00000081851.3	ENSMUSG00000026109	ENSMUST00000186103			Tmeff2			protein_coding
Sox9_E11_Sample1_peak_804	chr1	50964402	50964918	+	26	NA	intron (ENSMUST00000081851.3, intron 4 of 9)	protein_coding-intron (ENSMUST00000081851.3, intron 4 of 9)	37141	ENSMUST00000081851.3	ENSMUSG00000026109	ENSMUST00000186103			Tmeff2			protein_coding
Sox9_E11_Sample1_peak_805	chr1	51058014	51058877	+	69	NA	intron (ENSMUST00000081851.3, intron 4 of 9)	protein_coding-intron (ENSMUST00000081851.3, intron 4 of 9)	43132	ENSMUST00000175165.1	ENSMUSG00000092906	ENSMUST00000175165			Gm25736			miRNA
Sox9_E11_Sample1_peak_807	chr1	51152185	51152768	+	26	NA	intron (ENSMUST00000081851.3, intron 7 of 9)	protein_coding-intron (ENSMUST00000081851.3, intron 7 of 9)	4167	ENSMUST00000187777.1	ENSMUSG00000099924	ENSMUST00000187777			Gm28320			lncRNA
Sox9_E11_Sample1_peak_808	chr1	51241899	51242701	+	53	NA	intron (ENSMUST00000189867.1, intron 4 of 4)	lncRNA-intron (ENSMUST00000189867.1, intron 4 of 4)	-46826	ENSMUST00000051572.7	ENSMUSG00000045954	ENSMUST00000051572			Cavin2			protein_coding
Sox9_E11_Sample1_peak_809	chr1	51265348	51265947	+	52	NA	intron (ENSMUST00000189867.1, intron 2 of 4)	lncRNA-intron (ENSMUST00000189867.1, intron 2 of 4)	-23479	ENSMUST00000051572.7	ENSMUSG00000045954	ENSMUST00000051572			Cavin2			protein_coding
Sox9_E11_Sample1_peak_810	chr1	51288347	51289935	+	343	NA	promoter-TSS (ENSMUST00000051572.7)	protein_coding-promoter-TSS (ENSMUST00000051572.7)	15	ENSMUST00000051572.7	ENSMUSG00000045954	ENSMUST00000051572			Cavin2			protein_coding
Sox9_E11_Sample1_peak_811	chr1	51331527	51332028	+	59	NA	intron (ENSMUST00000189867.1, intron 1 of 4)	lncRNA-intron (ENSMUST00000189867.1, intron 1 of 4)	2002	ENSMUST00000189867.1	ENSMUSG00000101799	ENSMUST00000189867			9330175M20Rik			lncRNA
Sox9_E11_Sample1_peak_812	chr1	51333429	51334399	+	146	NA	promoter-TSS (ENSMUST00000189867.1)	lncRNA-promoter-TSS (ENSMUST00000189867.1)	-135	ENSMUST00000189867.1	ENSMUSG00000101799	ENSMUST00000189867			9330175M20Rik			lncRNA
Sox9_E11_Sample1_peak_814	chr1	51477655	51478839	+	612	NA	promoter-TSS (ENSMUST00000186003.6)	protein_coding-promoter-TSS (ENSMUST00000186003.6)	152	ENSMUST00000190103.6	ENSMUSG00000026107	ENSMUST00000185534			Nabp1			protein_coding
Sox9_E11_Sample1_peak_815	chr1	51508701	51509936	+	244	NA	TTS (ENSMUST00000189410.1)	lncRNA-TTS (ENSMUST00000189410.1)	3011	ENSMUST00000190169.1	ENSMUSG00000099413	ENSMUST00000190169			Gm17767			lncRNA
Sox9_E11_Sample1_peak_816	chr1	51530059	51531648	+	92	NA	intron (ENSMUST00000189410.1, intron 3 of 3)	lncRNA-intron (ENSMUST00000189410.1, intron 3 of 3)	-1484	ENSMUST00000194442.1	ENSMUSG00000103424	ENSMUST00000194442			Gm37535			TEC
Sox9_E11_Sample1_peak_817	chr1	51566244	51567290	+	80	NA	intron (ENSMUST00000189410.1, intron 3 of 3)	lncRNA-intron (ENSMUST00000189410.1, intron 3 of 3)	29951	ENSMUST00000189410.1	ENSMUSG00000099413	ENSMUST00000190169			Gm17767			lncRNA
Sox9_E11_Sample1_peak_818	chr1	51596740	51597677	+	163	NA	promoter-TSS (ENSMUST00000189410.1)	lncRNA-promoter-TSS (ENSMUST00000189410.1)	-490	ENSMUST00000189410.1	ENSMUSG00000099413	ENSMUST00000190169			Gm17767			lncRNA
Sox9_E11_Sample1_peak_819	chr1	51643397	51644599	+	234	NA	Intergenic	Intergenic	-47280	ENSMUST00000189410.1	ENSMUSG00000099413	ENSMUST00000190169			Gm17767			lncRNA
Sox9_E11_Sample1_peak_820	chr1	51687480	51688354	+	92	NA	Intergenic	Intergenic	9983	ENSMUST00000189576.1	ENSMUSG00000101741	ENSMUST00000189576			Gm28055			lncRNA
Sox9_E11_Sample1_peak_821	chr1	51697407	51697775	+	76	NA	intron (ENSMUST00000186769.1, intron 1 of 1)	lncRNA-intron (ENSMUST00000186769.1, intron 1 of 1)	309	ENSMUST00000189576.1	ENSMUSG00000101741	ENSMUST00000189576			Gm28055			lncRNA
Sox9_E11_Sample1_peak_823	chr1	51747717	51748444	+	81	NA	Intergenic	Intergenic	-1137	ENSMUST00000186769.1	ENSMUSG00000101741	ENSMUST00000189576			Gm28055			lncRNA
Sox9_E11_Sample1_peak_824	chr1	51782099	51782732	+	85	NA	promoter-TSS (ENSMUST00000126952.1)	protein_coding-promoter-TSS (ENSMUST00000126952.1)	-211	ENSMUST00000126952.1	ENSMUSG00000018417	ENSMUST00000114537			Myo1b			protein_coding
Sox9_E11_Sample1_peak_825	chr1	51820087	51820524	+	26	NA	intron (ENSMUST00000151525.7, intron 5 of 6)	protein_coding-intron (ENSMUST00000018561.13, intron 5 of 30)	241	ENSMUST00000135125.7	ENSMUSG00000018417	ENSMUST00000114537			Myo1b			protein_coding
Sox9_E11_Sample1_peak_826	chr1	51848987	51850163	+	113	NA	promoter-TSS (ENSMUST00000186428.1)	lncRNA-promoter-TSS (ENSMUST00000186428.1)	-457	ENSMUST00000186428.1	ENSMUSG00000101724	ENSMUST00000186428			Gm29453			lncRNA
Sox9_E11_Sample1_peak_827	chr1	51856075	51857279	+	198	NA	intron (ENSMUST00000018561.13, intron 3 of 30)	protein_coding-intron (ENSMUST00000018561.13, intron 3 of 30)	-5571	ENSMUST00000123299.1	ENSMUSG00000018417	ENSMUST00000114537			Myo1b			protein_coding
Sox9_E11_Sample1_peak_828	chr1	51870758	51871256	+	56	NA	intron (ENSMUST00000126657.1, intron 3 of 3)	protein_coding-intron (ENSMUST00000018561.13, intron 2 of 30)	8601	ENSMUST00000186817.1	ENSMUSG00000100313	ENSMUST00000186817			Gm28323			lncRNA
Sox9_E11_Sample1_peak_829	chr1	51915077	51916243	+	484	NA	intron (ENSMUST00000126657.1, intron 1 of 3)	protein_coding-intron (ENSMUST00000018561.13, intron 1 of 30)	252	ENSMUST00000151525.7	ENSMUSG00000018417	ENSMUST00000114537			Myo1b			protein_coding
Sox9_E11_Sample1_peak_830	chr1	51944626	51945042	+	60	NA	Intergenic	Intergenic	-3573	ENSMUST00000097103.4	ENSMUSG00000072324	ENSMUST00000097103			Gm8420			processed_pseudogene
Sox9_E11_Sample1_peak_831	chr1	51996505	51997291	+	140	NA	intron (ENSMUST00000168302.7, intron 2 of 24)	protein_coding-intron (ENSMUST00000168302.7, intron 2 of 24)	9750	ENSMUST00000168302.7	ENSMUSG00000062939	ENSMUST00000168302			Stat4			protein_coding
Sox9_E11_Sample1_peak_832	chr1	52008390	52008912	+	71	NA	promoter-TSS (ENSMUST00000187053.1)	protein_coding-promoter-TSS (ENSMUST00000187053.1)	25	ENSMUST00000187053.1	ENSMUSG00000062939	ENSMUST00000168302			Stat4			protein_coding
Sox9_E11_Sample1_peak_833	chr1	52088586	52089659	+	143	NA	intron (ENSMUST00000168302.7, intron 15 of 24)	protein_coding-intron (ENSMUST00000027277.6, intron 14 of 23)	1944	ENSMUST00000105087.1	ENSMUSG00000078291	ENSMUST00000105087			Gm3940			processed_pseudogene
Sox9_E11_Sample1_peak_834	chr1	52102727	52103371	+	97	NA	intron (ENSMUST00000185516.1, intron 11 of 33)	protein_coding-intron (ENSMUST00000027277.6, intron 21 of 23)	-2400	ENSMUST00000187554.1	ENSMUSG00000062939	ENSMUST00000168302			Stat4			protein_coding
Sox9_E11_Sample1_peak_835	chr1	52113293	52114007	+	216	NA	intron (ENSMUST00000210323.1, intron 1 of 1)	lncRNA-intron (ENSMUST00000185516.1, intron 11 of 33)	101	ENSMUST00000210323.1	ENSMUSG00000109599	ENSMUST00000210323			Gm31812			lncRNA
Sox9_E11_Sample1_peak_836	chr1	52118962	52120040	+	267	NA	promoter-TSS (ENSMUST00000070968.13)	protein_coding-promoter-TSS (ENSMUST00000070968.13)	3	ENSMUST00000188681.6	ENSMUSG00000026104	ENSMUST00000188681			Stat1			protein_coding
Sox9_E11_Sample1_peak_837	chr1	52146527	52146997	+	39	NA	intron (ENSMUST00000185516.1, intron 26 of 33)	protein_coding-intron (ENSMUST00000070968.13, intron 15 of 24)	-3342	ENSMUST00000189075.1	ENSMUSG00000026104	ENSMUST00000188681			Stat1			protein_coding
Sox9_E11_Sample1_peak_839	chr1	52232118	52233670	+	698	NA	promoter-TSS (ENSMUST00000114512.7)	protein_coding-promoter-TSS (ENSMUST00000114512.7)	-83	ENSMUST00000142976.1	ENSMUSG00000026103	ENSMUST00000129107			Gls			protein_coding
Sox9_E11_Sample1_peak_840	chr1	52251299	52251687	+	19	NA	Intergenic	Intergenic	-18261	ENSMUST00000114510.7	ENSMUSG00000026103	ENSMUST00000129107			Gls			protein_coding
Sox9_E11_Sample1_peak_841	chr1	52290505	52291048	+	39	NA	Intergenic	Intergenic	-1681	ENSMUST00000185256.1	ENSMUSG00000099648	ENSMUST00000185256			Gm5975			processed_pseudogene
Sox9_E11_Sample1_peak_842	chr1	52302551	52303064	+	39	NA	Intergenic	Intergenic	-13712	ENSMUST00000185256.1	ENSMUSG00000099648	ENSMUST00000185256			Gm5975			processed_pseudogene
Sox9_E11_Sample1_peak_843	chr1	52364292	52364864	+	46	NA	Intergenic	Intergenic	-75483	ENSMUST00000185256.1	ENSMUSG00000099648	ENSMUST00000185256			Gm5975			processed_pseudogene
Sox9_E11_Sample1_peak_845	chr1	52499775	52501683	+	136	NA	promoter-TSS (ENSMUST00000069792.13)	protein_coding-promoter-TSS (ENSMUST00000069792.13)	-50	ENSMUST00000069792.13	ENSMUSG00000002881	ENSMUST00000170269			Nab1			protein_coding
Sox9_E11_Sample1_peak_848	chr1	52597757	52598236	+	67	NA	Intergenic	Intergenic	13478	ENSMUST00000179821.2	ENSMUSG00000100007	ENSMUST00000179821			Gm5527			processed_pseudogene
Sox9_E11_Sample1_peak_849	chr1	52630536	52631827	+	441	NA	exon (ENSMUST00000190108.6, exon 1 of 4)	protein_coding-exon (ENSMUST00000190108.6, exon 1 of 4)	384	ENSMUST00000185790.6	ENSMUSG00000043015	ENSMUST00000190108			Nemp2			protein_coding
Sox9_E11_Sample1_peak_850	chr1	52640118	52640721	+	76	NA	intron (ENSMUST00000190108.6, intron 2 of 3)	protein_coding-intron (ENSMUST00000165859.7, intron 2 of 8)	-1097	ENSMUST00000186903.6	ENSMUSG00000043015	ENSMUST00000190108			Nemp2			protein_coding
Sox9_E11_Sample1_peak_851	chr1	52683382	52684210	+	151	NA	intron (ENSMUST00000156876.7, intron 2 of 6)	protein_coding-intron (ENSMUST00000087701.3, intron 2 of 5)	-14445	ENSMUST00000149887.1	ENSMUSG00000041439	ENSMUST00000147421			Mfsd6			protein_coding
Sox9_E11_Sample1_peak_852	chr1	52726386	52727786	+	396	NA	exon (ENSMUST00000087701.3, exon 1 of 6)	protein_coding-exon (ENSMUST00000087701.3, exon 1 of 6)	272	ENSMUST00000147421.1	ENSMUSG00000041439	ENSMUST00000147421			Mfsd6			protein_coding
Sox9_E11_Sample1_peak_853	chr1	52816997	52817930	+	412	NA	promoter-TSS (ENSMUST00000162351.1)	protein_coding-promoter-TSS (ENSMUST00000162351.1)	-12	ENSMUST00000162351.1	ENSMUSG00000026102	ENSMUST00000159725			Inpp1			protein_coding
Sox9_E11_Sample1_peak_854	chr1	52844323	52845665	+	345	NA	promoter-TSS (ENSMUST00000044478.6)	protein_coding-promoter-TSS (ENSMUST00000044478.6)	-19	ENSMUST00000159352.7	ENSMUSG00000041426	ENSMUST00000161125			Hibch			protein_coding
Sox9_E11_Sample1_peak_855	chr1	52951072	52951594	+	22	NA	intron (ENSMUST00000191441.1, intron 1 of 1)	protein_coding-intron (ENSMUST00000050567.10, intron 1 of 1)	1511	ENSMUST00000050567.10	ENSMUSG00000043629	ENSMUST00000186266			1700019D03Rik			protein_coding
Sox9_E11_Sample1_peak_856	chr1	52952305	52953455	+	206	NA	promoter-TSS (ENSMUST00000050567.10)	protein_coding-promoter-TSS (ENSMUST00000050567.10)	-36	ENSMUST00000050567.10	ENSMUSG00000043629	ENSMUST00000186266			1700019D03Rik			protein_coding
Sox9_E11_Sample1_peak_857	chr1	53060370	53060691	+	28	NA	Intergenic	Intergenic	-1110	ENSMUST00000027269.6	ENSMUSG00000026100	ENSMUST00000027269			Mstn			protein_coding
Sox9_E11_Sample1_peak_858	chr1	53296332	53297836	+	376	NA	promoter-TSS (ENSMUST00000027266.3)	protein_coding-promoter-TSS (ENSMUST00000027266.3)	-11	ENSMUST00000135746.7	ENSMUSG00000026097	ENSMUST00000135746			Ormdl1			protein_coding
Sox9_E11_Sample1_peak_859	chr1	53312998	53314083	+	235	NA	promoter-TSS (ENSMUST00000027265.9)	protein_coding-promoter-TSS (ENSMUST00000027265.9)	-84	ENSMUST00000027265.9	ENSMUSG00000026096	ENSMUST00000150115			Osgepl1			protein_coding
Sox9_E11_Sample1_peak_860	chr1	53352043	53352961	+	379	NA	promoter-TSS (ENSMUST00000136468.1)	protein_coding-promoter-TSS (ENSMUST00000136468.1)	68	ENSMUST00000136468.1	ENSMUSG00000026095	ENSMUST00000147021			Asnsd1			protein_coding
Sox9_E11_Sample1_peak_861	chr1	53485007	53485891	+	61	NA	intron (ENSMUST00000094964.6, intron 46 of 65)	protein_coding-intron (ENSMUST00000094964.6, intron 46 of 65)	-42054	ENSMUST00000174916.1	ENSMUSG00000092657	ENSMUST00000174916			Gm25240			miRNA
Sox9_E11_Sample1_peak_862	chr1	53646377	53646759	+	85	NA	intron (ENSMUST00000094964.6, intron 9 of 65)	protein_coding-intron (ENSMUST00000094964.6, intron 9 of 65)	60193	ENSMUST00000094964.6	ENSMUSG00000096141	ENSMUST00000189677			Dnah7a			protein_coding
Sox9_E11_Sample1_peak_863	chr1	53706448	53707077	+	213	NA	promoter-TSS (ENSMUST00000094964.6)	protein_coding-promoter-TSS (ENSMUST00000094964.6)	-1	ENSMUST00000094964.6	ENSMUSG00000096141	ENSMUST00000189677			Dnah7a			protein_coding
Sox9_E11_Sample1_peak_864	chr1	53728566	53729522	+	75	NA	Intergenic	Intergenic	-22260	ENSMUST00000189677.1	ENSMUSG00000096141	ENSMUST00000189677			Dnah7a			protein_coding
Sox9_E11_Sample1_peak_865	chr1	53784303	53785611	+	463	NA	intron (ENSMUST00000027263.13, intron 1 of 7)	protein_coding-intron (ENSMUST00000027263.13, intron 1 of 7)	200	ENSMUST00000185920.1	ENSMUSG00000026094	ENSMUST00000185920			Stk17b			protein_coding
Sox9_E11_Sample1_peak_866	chr1	53823727	53824234	+	165	NA	intron (ENSMUST00000087659.10, intron 28 of 28)	protein_coding-intron (ENSMUST00000087659.10, intron 28 of 28)	17191	ENSMUST00000150677.7	ENSMUSG00000042807	ENSMUST00000120904			Hecw2			protein_coding
Sox9_E11_Sample1_peak_867	chr1	53838653	53839162	+	53	NA	TTS (ENSMUST00000152870.1)	protein_coding-TTS (ENSMUST00000152870.1)	2264	ENSMUST00000150677.7	ENSMUSG00000042807	ENSMUST00000120904			Hecw2			protein_coding
Sox9_E11_Sample1_peak_868	chr1	53846004	53846174	+	30	NA	intron (ENSMUST00000152870.1, intron 4 of 5)	protein_coding-intron (ENSMUST00000087659.10, intron 21 of 28)	-3335	ENSMUST00000184834.1	ENSMUSG00000098443	ENSMUST00000184834			Mir7681			miRNA
Sox9_E11_Sample1_peak_871	chr1	54193974	54195203	+	266	NA	promoter-TSS (ENSMUST00000120904.7)	protein_coding-promoter-TSS (ENSMUST00000120904.7)	446	ENSMUST00000097741.2	ENSMUSG00000042807	ENSMUST00000120904			Hecw2			protein_coding
Sox9_E11_Sample1_peak_872	chr1	54250110	54251095	+	315	NA	promoter-TSS (ENSMUST00000027128.10)	protein_coding-promoter-TSS (ENSMUST00000027128.10)	-81	ENSMUST00000161988.1	ENSMUSG00000025983	ENSMUST00000163072			Ccdc150			protein_coding
Sox9_E11_Sample1_peak_873	chr1	54438468	54439267	+	219	NA	exon (ENSMUST00000041638.7, exon 1 of 18)	protein_coding-exon (ENSMUST00000041638.7, exon 1 of 18)	104	ENSMUST00000041638.7	ENSMUSG00000041303	ENSMUST00000190419			Gtf3c3			protein_coding
Sox9_E11_Sample1_peak_874	chr1	54556979	54558017	+	380	NA	exon (ENSMUST00000097739.4, exon 1 of 27)	protein_coding-exon (ENSMUST00000097739.4, exon 1 of 27)	129	ENSMUST00000189506.1	ENSMUSG00000073678	ENSMUST00000187949			Pgap1			protein_coding
Sox9_E11_Sample1_peak_875	chr1	54612251	54613342	+	169	NA	Intergenic	Intergenic	35817	ENSMUST00000189563.1	ENSMUSG00000052331	ENSMUST00000179242			Ankrd44			protein_coding
Sox9_E11_Sample1_peak_876	chr1	54639901	54641030	+	93	NA	Intergenic	Intergenic	8148	ENSMUST00000189563.1	ENSMUSG00000052331	ENSMUST00000179242			Ankrd44			protein_coding
Sox9_E11_Sample1_peak_877	chr1	54726107	54726953	+	93	NA	intron (ENSMUST00000044359.15, intron 15 of 27)	protein_coding-intron (ENSMUST00000044359.15, intron 15 of 27)	-2107	ENSMUST00000179398.1	ENSMUSG00000052331	ENSMUST00000179242			Ankrd44			protein_coding
Sox9_E11_Sample1_peak_878	chr1	54815268	54815751	+	129	NA	intron (ENSMUST00000044359.15, intron 2 of 27)	protein_coding-intron (ENSMUST00000044359.15, intron 2 of 27)	-2066	ENSMUST00000178905.1	ENSMUSG00000052331	ENSMUST00000179242			Ankrd44			protein_coding
Sox9_E11_Sample1_peak_879	chr1	54830087	54830592	+	35	NA	intron (ENSMUST00000180327.7, intron 1 of 7)	protein_coding-intron (ENSMUST00000044359.15, intron 1 of 27)	-16896	ENSMUST00000178905.1	ENSMUSG00000052331	ENSMUST00000179242			Ankrd44			protein_coding
Sox9_E11_Sample1_peak_880	chr1	54849835	54850173	+	26	NA	intron (ENSMUST00000180327.7, intron 1 of 7)	protein_coding-intron (ENSMUST00000044359.15, intron 1 of 27)	34707	ENSMUST00000177679.1	ENSMUSG00000052331	ENSMUST00000179242			Ankrd44			protein_coding
Sox9_E11_Sample1_peak_881	chr1	54867433	54868506	+	39	NA	intron (ENSMUST00000180327.7, intron 1 of 7)	protein_coding-intron (ENSMUST00000044359.15, intron 1 of 27)	16742	ENSMUST00000177679.1	ENSMUSG00000052331	ENSMUST00000179242			Ankrd44			protein_coding
Sox9_E11_Sample1_peak_883	chr1	54881306	54882707	+	113	NA	intron (ENSMUST00000180327.7, intron 1 of 7)	protein_coding-intron (ENSMUST00000044359.15, intron 1 of 27)	2705	ENSMUST00000177679.1	ENSMUSG00000052331	ENSMUST00000179242			Ankrd44			protein_coding
Sox9_E11_Sample1_peak_884	chr1	54925575	54926960	+	264	NA	promoter-TSS (ENSMUST00000178935.7)	protein_coding-promoter-TSS (ENSMUST00000178935.7)	87	ENSMUST00000178935.7	ENSMUSG00000052331	ENSMUST00000179242			Ankrd44			protein_coding
Sox9_E11_Sample1_peak_885	chr1	54983290	54984106	+	47	NA	Intergenic	Intergenic	7417	ENSMUST00000190175.1	ENSMUSG00000025982	ENSMUST00000188419			Sf3b1			protein_coding
Sox9_E11_Sample1_peak_886	chr1	55026416	55027811	+	272	NA	intron (ENSMUST00000191303.1, intron 1 of 6)	protein_coding-intron (ENSMUST00000027127.13, intron 1 of 24)	260	ENSMUST00000189051.1	ENSMUSG00000025982	ENSMUST00000188419			Sf3b1			protein_coding
Sox9_E11_Sample1_peak_887	chr1	55052311	55053424	+	486	NA	promoter-TSS (ENSMUST00000027125.6)	protein_coding-promoter-TSS (ENSMUST00000027125.6)	-2	ENSMUST00000185474.1	ENSMUSG00000025981	ENSMUST00000185918			Coq10b			protein_coding
Sox9_E11_Sample1_peak_888	chr1	55075205	55075928	+	31	NA	Intergenic	Intergenic	9302	ENSMUST00000190239.1	ENSMUSG00000101122	ENSMUST00000190239			Gm17971			processed_pseudogene
Sox9_E11_Sample1_peak_889	chr1	55087153	55088652	+	298	NA	promoter-TSS (ENSMUST00000075242.6)	protein_coding-promoter-TSS (ENSMUST00000075242.6)	122	ENSMUST00000027123.14	ENSMUSG00000025980	ENSMUST00000127861			Hspd1			protein_coding
Sox9_E11_Sample1_peak_890	chr1	55131053	55131941	+	536	NA	exon (ENSMUST00000162553.1, exon 1 of 8)	protein_coding-exon (ENSMUST00000162553.1, exon 1 of 8)	171	ENSMUST00000159743.1	ENSMUSG00000025979	ENSMUST00000187422			Mob4			protein_coding
Sox9_E11_Sample1_peak_891	chr1	55213231	55214057	+	64	NA	intron (ENSMUST00000114428.2, intron 2 of 5)	protein_coding-intron (ENSMUST00000027121.14, intron 2 of 8)	-7155	ENSMUST00000133294.1	ENSMUSG00000025978	ENSMUST00000132055			Rftn2			protein_coding
Sox9_E11_Sample1_peak_892	chr1	55226260	55226753	+	50	NA	exon (ENSMUST00000027121.14, exon 1 of 9)	protein_coding-exon (ENSMUST00000027121.14, exon 1 of 9)	208	ENSMUST00000209801.1	ENSMUSG00000097649	ENSMUST00000209801			Gm10561			lncRNA
Sox9_E11_Sample1_peak_893	chr1	55236870	55238086	+	253	NA	exon (ENSMUST00000061334.9, exon 1 of 1)	protein_coding-exon (ENSMUST00000061334.9, exon 1 of 1)	301	ENSMUST00000061334.9	ENSMUSG00000046994	ENSMUST00000061334			Mars2			protein_coding
Sox9_E11_Sample1_peak_894	chr1	55363154	55364028	+	243	NA	promoter-TSS (ENSMUST00000087585.9)	protein_coding-promoter-TSS (ENSMUST00000087585.9)	-122	ENSMUST00000159398.1	ENSMUSG00000025977	ENSMUST00000161810			Boll			protein_coding
Sox9_E11_Sample1_peak_895	chr1	55404592	55406843	+	378	NA	promoter-TSS (ENSMUST00000042986.9)	protein_coding-promoter-TSS (ENSMUST00000042986.9)	-204	ENSMUST00000042986.9	ENSMUSG00000038349	ENSMUST00000042986			Plcl1			protein_coding
Sox9_E11_Sample1_peak_896	chr1	55436193	55437555	+	164	NA	intron (ENSMUST00000042986.9, intron 1 of 5)	protein_coding-intron (ENSMUST00000042986.9, intron 1 of 5)	-4030	ENSMUST00000193928.1	ENSMUSG00000102145	ENSMUST00000193928			Gm38056			TEC
Sox9_E11_Sample1_peak_897	chr1	55445432	55446439	+	130	NA	promoter-TSS (ENSMUST00000186507.1)	processed_pseudogene-promoter-TSS (ENSMUST00000186507.1)	-911	ENSMUST00000186507.1	ENSMUSG00000100309	ENSMUST00000186507			Gm6644			processed_pseudogene
Sox9_E11_Sample1_peak_898	chr1	55500506	55501173	+	82	NA	intron (ENSMUST00000042986.9, intron 1 of 5)	protein_coding-intron (ENSMUST00000042986.9, intron 1 of 5)	-55815	ENSMUST00000186507.1	ENSMUSG00000100309	ENSMUST00000186507			Gm6644			processed_pseudogene
Sox9_E11_Sample1_peak_900	chr1	55552035	55552653	+	85	NA	intron (ENSMUST00000042986.9, intron 1 of 5)	protein_coding-intron (ENSMUST00000042986.9, intron 1 of 5)	-7116	ENSMUST00000193032.1	ENSMUSG00000102831	ENSMUST00000193032			Gm37382			TEC
Sox9_E11_Sample1_peak_901	chr1	55576076	55576560	+	46	NA	intron (ENSMUST00000042986.9, intron 1 of 5)	protein_coding-intron (ENSMUST00000042986.9, intron 1 of 5)	16858	ENSMUST00000193032.1	ENSMUSG00000102831	ENSMUST00000193032			Gm37382			TEC
Sox9_E11_Sample1_peak_902	chr1	55605259	55605898	+	53	NA	intron (ENSMUST00000042986.9, intron 1 of 5)	protein_coding-intron (ENSMUST00000042986.9, intron 1 of 5)	46118	ENSMUST00000193032.1	ENSMUSG00000102831	ENSMUST00000193032			Gm37382			TEC
Sox9_E11_Sample1_peak_903	chr1	55618112	55618823	+	39	NA	intron (ENSMUST00000042986.9, intron 1 of 5)	protein_coding-intron (ENSMUST00000042986.9, intron 1 of 5)	59007	ENSMUST00000193032.1	ENSMUSG00000102831	ENSMUST00000193032			Gm37382			TEC
Sox9_E11_Sample1_peak_908	chr1	55888399	55889552	+	114	NA	Intergenic	Intergenic	-42266	ENSMUST00000189293.1	ENSMUSG00000099950	ENSMUST00000188040			9130227L01Rik			lncRNA
Sox9_E11_Sample1_peak_909	chr1	56359798	56360458	+	70	NA	Intergenic	Intergenic	-91279	ENSMUST00000185232.1	ENSMUSG00000100944	ENSMUST00000185232			Gm28900			processed_pseudogene
Sox9_E11_Sample1_peak_910	chr1	56886455	56886891	+	30	NA	intron (ENSMUST00000177424.1, intron 2 of 6)	protein_coding-intron (ENSMUST00000042857.13, intron 5 of 9)	83167	ENSMUST00000176759.1	ENSMUSG00000038331	ENSMUST00000114415			Satb2			protein_coding
Sox9_E11_Sample1_peak_912	chr1	56971969	56973730	+	184	NA	promoter-TSS (ENSMUST00000042857.13)	protein_coding-promoter-TSS (ENSMUST00000042857.13)	-347	ENSMUST00000042857.13	ENSMUSG00000038331	ENSMUST00000114415			Satb2			protein_coding
Sox9_E11_Sample1_peak_913	chr1	57077624	57078760	+	98	NA	Intergenic	Intergenic	37799	ENSMUST00000187858.1	ENSMUSG00000087022	ENSMUST00000187927			9130024F11Rik			lncRNA
Sox9_E11_Sample1_peak_914	chr1	57205108	57206057	+	191	NA	intron (ENSMUST00000190488.1, intron 5 of 6)	lncRNA-intron (ENSMUST00000190488.1, intron 5 of 6)	9411	ENSMUST00000190488.1	ENSMUSG00000101429	ENSMUST00000190488			BC055402			lncRNA
Sox9_E11_Sample1_peak_916	chr1	57331222	57332189	+	99	NA	Intergenic	Intergenic	-39304	ENSMUST00000188353.1	ENSMUSG00000101129	ENSMUST00000188353			Gm5254			processed_pseudogene
Sox9_E11_Sample1_peak_917	chr1	57377231	57378290	+	354	NA	promoter-TSS (ENSMUST00000181949.2)	lncRNA-promoter-TSS (ENSMUST00000181949.2)	120	ENSMUST00000187255.1	ENSMUSG00000038323	ENSMUST00000185952			1700066M21Rik			protein_coding
Sox9_E11_Sample1_peak_918	chr1	57406167	57407290	+	324	NA	promoter-TSS (ENSMUST00000079998.12)	protein_coding-promoter-TSS (ENSMUST00000079998.12)	-31	ENSMUST00000185709.1	ENSMUSG00000025971	ENSMUST00000027114			Maip1			protein_coding
Sox9_E11_Sample1_peak_919	chr1	57543871	57544625	+	120	NA	Intergenic	Intergenic	19803	ENSMUST00000186851.1	ENSMUSG00000101151	ENSMUST00000186851			Gm17929			processed_pseudogene
Sox9_E11_Sample1_peak_920	chr1	57613167	57613581	+	53	NA	Intergenic	Intergenic	-49323	ENSMUST00000186851.1	ENSMUSG00000101151	ENSMUST00000186851			Gm17929			processed_pseudogene
Sox9_E11_Sample1_peak_922	chr1	57774099	57775614	+	277	NA	promoter-TSS (ENSMUST00000165235.1)	protein_coding-promoter-TSS (ENSMUST00000165235.1)	-5	ENSMUST00000167085.7	ENSMUSG00000038305	ENSMUST00000172287			Spats2l			protein_coding
Sox9_E11_Sample1_peak_923	chr1	57847093	57847993	+	66	NA	intron (ENSMUST00000169772.2, intron 1 of 11)	protein_coding-intron (ENSMUST00000163239.7, intron 2 of 11)	1972	ENSMUST00000169772.2	ENSMUSG00000038305	ENSMUST00000172287			Spats2l			protein_coding
Sox9_E11_Sample1_peak_924	chr1	57941442	57941931	+	20	NA	intron (ENSMUST00000167085.7, intron 12 of 13)	protein_coding-intron (ENSMUST00000163239.7, intron 10 of 11)	20416	ENSMUST00000163006.1	ENSMUSG00000054770	ENSMUST00000160130			Kctd18			protein_coding
Sox9_E11_Sample1_peak_925	chr1	57947544	57948457	+	161	NA	exon (ENSMUST00000167085.7, exon 14 of 14)	protein_coding-exon (ENSMUST00000167085.7, exon 14 of 14)	14102	ENSMUST00000163006.1	ENSMUSG00000054770	ENSMUST00000160130			Kctd18			protein_coding
Sox9_E11_Sample1_peak_926	chr1	57969287	57970281	+	296	NA	promoter-TSS (ENSMUST00000161608.7)	protein_coding-promoter-TSS (ENSMUST00000161608.7)	-260	ENSMUST00000161608.7	ENSMUSG00000054770	ENSMUST00000160130			Kctd18			protein_coding
Sox9_E11_Sample1_peak_927	chr1	57995638	57996652	+	254	NA	exon (ENSMUST00000027202.8, exon 1 of 9)	protein_coding-exon (ENSMUST00000027202.8, exon 1 of 9)	174	ENSMUST00000027202.8	ENSMUSG00000026039	ENSMUST00000027202			Sgo2a			protein_coding
Sox9_E11_Sample1_peak_928	chr1	58029569	58030533	+	126	NA	promoter-TSS (ENSMUST00000160168.1)	protein_coding-promoter-TSS (ENSMUST00000160168.1)	87	ENSMUST00000160168.1	ENSMUSG00000063558	ENSMUST00000001027			Aox1			protein_coding
Sox9_E11_Sample1_peak_929	chr1	58030954	58031410	+	33	NA	intron (ENSMUST00000160168.1, intron 1 of 14)	protein_coding-intron (ENSMUST00000001027.6, intron 1 of 34)	1218	ENSMUST00000160168.1	ENSMUSG00000063558	ENSMUST00000001027			Aox1			protein_coding
Sox9_E11_Sample1_peak_930	chr1	58148411	58149031	+	32	NA	intron (ENSMUST00000040999.13, intron 12 of 34)	protein_coding-intron (ENSMUST00000040999.13, intron 12 of 34)	6367	ENSMUST00000158650.1	ENSMUSG00000089275	ENSMUST00000158650			Gm24548			snoRNA
Sox9_E11_Sample1_peak_931	chr1	58290325	58290749	+	39	NA	intron (ENSMUST00000114366.2, intron 7 of 35)	protein_coding-intron (ENSMUST00000114366.2, intron 7 of 35)	12211	ENSMUST00000114366.2	ENSMUSG00000079554	ENSMUST00000114366			Aox2			protein_coding
Sox9_E11_Sample1_peak_932	chr1	58392291	58393940	+	319	NA	promoter-TSS (ENSMUST00000186949.1)	protein_coding-promoter-TSS (ENSMUST00000186949.1)	-9	ENSMUST00000188898.6	ENSMUSG00000051223	ENSMUST00000188630			Bzw1			protein_coding
Sox9_E11_Sample1_peak_933	chr1	58408818	58409332	+	33	NA	Intergenic	Intergenic	3786	ENSMUST00000139787.7	ENSMUSG00000026034	ENSMUST00000129303			Clk1			protein_coding
Sox9_E11_Sample1_peak_934	chr1	58422933	58424197	+	210	NA	intron (ENSMUST00000156931.7, intron 1 of 10)	protein_coding-intron (ENSMUST00000034868.13, intron 1 of 12)	501	ENSMUST00000129577.7	ENSMUSG00000026034	ENSMUST00000129303			Clk1			protein_coding
Sox9_E11_Sample1_peak_935	chr1	58444923	58446071	+	270	NA	promoter-TSS (ENSMUST00000081677.11)	protein_coding-promoter-TSS (ENSMUST00000081677.11)	-11	ENSMUST00000081677.11	ENSMUSG00000026035	ENSMUST00000190048			Ppil3			protein_coding
Sox9_E11_Sample1_peak_936	chr1	58504315	58505416	+	195	NA	promoter-TSS (ENSMUST00000129740.2)	lncRNA-promoter-TSS (ENSMUST00000129740.2)	60	ENSMUST00000190695.1	ENSMUSG00000026037	ENSMUST00000027198			Orc2			protein_coding
Sox9_E11_Sample1_peak_937	chr1	58585795	58586845	+	218	NA	promoter-TSS (ENSMUST00000027193.8)	protein_coding-promoter-TSS (ENSMUST00000027193.8)	3	ENSMUST00000161600.7	ENSMUSG00000038174	ENSMUST00000161600			Fam126b			protein_coding
Sox9_E11_Sample1_peak_938	chr1	58652299	58653000	+	79	NA	promoter-TSS (ENSMUST00000185352.1)	transcribed_unprocessed_pseudogene-promoter-TSS (ENSMUST00000185352.1)	8	ENSMUST00000185352.1	ENSMUSG00000102059	ENSMUST00000188643			Gm20257			transcribed_unprocessed_pseudogene
Sox9_E11_Sample1_peak_939	chr1	58711401	58712739	+	179	NA	intron (ENSMUST00000114313.7, intron 1 of 9)	protein_coding-intron (ENSMUST00000156870.1, intron 1 of 2)	510	ENSMUST00000114313.7	ENSMUSG00000026031	ENSMUST00000123553			Cflar			protein_coding
Sox9_E11_Sample1_peak_939-2	chr1	58713221	58713665	+	179	NA	promoter-TSS (ENSMUST00000189858.1)	protein_coding-promoter-TSS (ENSMUST00000189858.1)	126	ENSMUST00000069333.7	ENSMUSG00000026031	ENSMUST00000123553			Cflar			protein_coding
Sox9_E11_Sample1_peak_940	chr1	58795071	58796379	+	345	NA	exon (ENSMUST00000027189.14, exon 1 of 9)	protein_coding-exon (ENSMUST00000027189.14, exon 1 of 9)	248	ENSMUST00000191201.6	ENSMUSG00000026029	ENSMUST00000027189			Casp8			protein_coding
Sox9_E11_Sample1_peak_941	chr1	58859254	58860168	+	129	NA	intron (ENSMUST00000188624.1, intron 8 of 11)	unprocessed_pseudogene-intron (ENSMUST00000188624.1, intron 8 of 11)	33081	ENSMUST00000188624.1	ENSMUSG00000099719	ENSMUST00000188624			Gm28802			unprocessed_pseudogene
Sox9_E11_Sample1_peak_942	chr1	58951007	58951971	+	219	NA	intron (ENSMUST00000173719.1, intron 1 of 1)	protein_coding-intron (ENSMUST00000027186.11, intron 1 of 15)	-5152	ENSMUST00000174120.1	ENSMUSG00000026028	ENSMUST00000173590			Trak2			protein_coding
Sox9_E11_Sample1_peak_943	chr1	58973035	58974153	+	329	NA	promoter-TSS (ENSMUST00000027185.10)	protein_coding-promoter-TSS (ENSMUST00000027185.10)	72	ENSMUST00000147637.7	ENSMUSG00000026027	ENSMUST00000027185			Stradb			protein_coding
Sox9_E11_Sample1_peak_944	chr1	59119611	59120425	+	366	NA	promoter-TSS (ENSMUST00000087475.10)	protein_coding-promoter-TSS (ENSMUST00000087475.10)	76	ENSMUST00000094917.9	ENSMUSG00000038079	ENSMUST00000185951			Tmem237			protein_coding
Sox9_E11_Sample1_peak_946	chr1	59236872	59238165	+	288	NA	promoter-TSS (ENSMUST00000027178.12)	protein_coding-promoter-TSS (ENSMUST00000027178.12)	-287	ENSMUST00000027178.12	ENSMUSG00000026024	ENSMUST00000188469			Als2			protein_coding
Sox9_E11_Sample1_peak_947	chr1	59252928	59253746	+	68	NA	Intergenic	Intergenic	-3569	ENSMUST00000160662.7	ENSMUSG00000026023	ENSMUST00000114248			Cdk15			protein_coding
Sox9_E11_Sample1_peak_948	chr1	59321431	59322478	+	72	NA	intron (ENSMUST00000162906.1, intron 3 of 4)	protein_coding-intron (ENSMUST00000114248.2, intron 10 of 13)	23018	ENSMUST00000162906.1	ENSMUSG00000026023	ENSMUST00000114248			Cdk15			protein_coding
Sox9_E11_Sample1_peak_949	chr1	59341034	59341457	+	46	NA	intron (ENSMUST00000160662.7, intron 12 of 13)	protein_coding-intron (ENSMUST00000114248.2, intron 12 of 13)	-37685	ENSMUST00000187523.1	ENSMUSG00000099922	ENSMUST00000187523			Gm29016			lncRNA
Sox9_E11_Sample1_peak_950	chr1	59367980	59368721	+	120	NA	Intergenic	Intergenic	-10580	ENSMUST00000187523.1	ENSMUSG00000099922	ENSMUST00000187523			Gm29016			lncRNA
Sox9_E11_Sample1_peak_951	chr1	59422900	59423258	+	39	NA	Intergenic	Intergenic	26423	ENSMUST00000195013.1	ENSMUSG00000104502	ENSMUST00000195013			Gm37737			TEC
Sox9_E11_Sample1_peak_952	chr1	59449154	59449818	+	40	NA	promoter-TSS (ENSMUST00000195013.1)	TEC-promoter-TSS (ENSMUST00000195013.1)	16	ENSMUST00000195013.1	ENSMUSG00000104502	ENSMUST00000195013			Gm37737			TEC
Sox9_E11_Sample1_peak_954	chr1	59472608	59473615	+	68	NA	Intergenic	Intergenic	-9313	ENSMUST00000114246.3	ENSMUSG00000041075	ENSMUST00000114246			Fzd7			protein_coding
Sox9_E11_Sample1_peak_955	chr1	59481329	59484078	+	258	NA	exon (ENSMUST00000114246.3, exon 1 of 1)	protein_coding-exon (ENSMUST00000114246.3, exon 1 of 1)	279	ENSMUST00000114246.3	ENSMUSG00000041075	ENSMUST00000114246			Fzd7			protein_coding
Sox9_E11_Sample1_peak_956	chr1	59491419	59491878	+	31	NA	exon (ENSMUST00000180778.1, exon 2 of 2)	lncRNA-exon (ENSMUST00000180778.1, exon 2 of 2)	957	ENSMUST00000180778.1	ENSMUSG00000097819	ENSMUST00000180778			Gm26813			lncRNA
Sox9_E11_Sample1_peak_957	chr1	59497674	59498677	+	76	NA	Intergenic	Intergenic	-5570	ENSMUST00000180778.1	ENSMUSG00000097819	ENSMUST00000180778			Gm26813			lncRNA
Sox9_E11_Sample1_peak_958	chr1	59516030	59517005	+	163	NA	exon (ENSMUST00000114243.7, exon 1 of 20)	protein_coding-exon (ENSMUST00000114243.7, exon 1 of 20)	253	ENSMUST00000114243.7	ENSMUSG00000047361	ENSMUST00000185753			Gm973			protein_coding
Sox9_E11_Sample1_peak_959	chr1	59579313	59580383	+	91	NA	intron (ENSMUST00000114243.7, intron 11 of 19)	protein_coding-intron (ENSMUST00000114243.7, intron 11 of 19)	-2548	ENSMUST00000212835.1	ENSMUSG00000047361	ENSMUST00000185753			Gm973			protein_coding
Sox9_E11_Sample1_peak_961	chr1	59670036	59671254	+	176	NA	promoter-TSS (ENSMUST00000185265.1)	protein_coding-promoter-TSS (ENSMUST00000185265.1)	94	ENSMUST00000185265.1	ENSMUSG00000026021	ENSMUST00000123857			Sumo1			protein_coding
Sox9_E11_Sample1_peak_962	chr1	59684666	59685706	+	156	NA	exon (ENSMUST00000027174.9, exon 1 of 13)	protein_coding-exon (ENSMUST00000027174.9, exon 1 of 13)	132	ENSMUST00000189327.6	ENSMUSG00000026020	ENSMUST00000190231			Nop58			protein_coding
Sox9_E11_Sample1_peak_963	chr1	59719789	59720399	+	46	NA	Intergenic	Intergenic	15304	ENSMUST00000158468.3	ENSMUSG00000089093	ENSMUST00000158468			Snord11			snoRNA
Sox9_E11_Sample1_peak_964	chr1	59762698	59764715	+	214	NA	exon (ENSMUST00000087435.6, exon 1 of 13)	protein_coding-exon (ENSMUST00000087435.6, exon 1 of 13)	306	ENSMUST00000087435.6	ENSMUSG00000067336	ENSMUST00000190659			Bmpr2			protein_coding
Sox9_E11_Sample1_peak_965	chr1	59883058	59884142	+	66	NA	Intergenic	Intergenic	4089	ENSMUST00000193096.1	ENSMUSG00000103131	ENSMUST00000193096			Gm37977			TEC
Sox9_E11_Sample1_peak_966	chr1	59912551	59913961	+	281	NA	exon (ENSMUST00000036540.11, exon 1 of 8)	protein_coding-exon (ENSMUST00000036540.11, exon 1 of 8)	250	ENSMUST00000036540.11	ENSMUSG00000041040	ENSMUST00000189790			Fam117b			protein_coding
Sox9_E11_Sample1_peak_967	chr1	60042466	60043438	+	187	NA	exon (ENSMUST00000027172.12, exon 1 of 11)	protein_coding-exon (ENSMUST00000027172.12, exon 1 of 11)	135	ENSMUST00000027172.12	ENSMUSG00000026018	ENSMUST00000187364			Ica1l			protein_coding
Sox9_E11_Sample1_peak_968	chr1	60097241	60098794	+	268	NA	promoter-TSS (ENSMUST00000027173.14)	protein_coding-promoter-TSS (ENSMUST00000027173.14)	108	ENSMUST00000143342.7	ENSMUSG00000026019	ENSMUST00000027173			Wdr12			protein_coding
Sox9_E11_Sample1_peak_969	chr1	60179683	60181220	+	355	NA	promoter-TSS (ENSMUST00000160834.7)	protein_coding-promoter-TSS (ENSMUST00000160834.7)	-148	ENSMUST00000160834.7	ENSMUSG00000073664	ENSMUST00000187195			Nbeal1			protein_coding
Sox9_E11_Sample1_peak_970	chr1	60342922	60343970	+	336	NA	exon (ENSMUST00000060608.12, exon 1 of 13)	protein_coding-exon (ENSMUST00000060608.12, exon 1 of 13)	123	ENSMUST00000148443.2	ENSMUSG00000049439	ENSMUST00000060608			Cyp20a1			protein_coding
Sox9_E11_Sample1_peak_971	chr1	60409001	60410458	+	213	NA	promoter-TSS (ENSMUST00000187709.6)	protein_coding-promoter-TSS (ENSMUST00000187709.6)	-5	ENSMUST00000189980.6	ENSMUSG00000026782	ENSMUST00000189649			Abi2			protein_coding
Sox9_E11_Sample1_peak_972	chr1	60565430	60567302	+	200	NA	intron (ENSMUST00000142258.2, intron 1 of 3)	protein_coding-intron (ENSMUST00000027168.11, intron 1 of 15)	399	ENSMUST00000027168.11	ENSMUSG00000026014	ENSMUST00000142258			Raph1			protein_coding
Sox9_E11_Sample1_peak_973	chr1	60595975	60596946	+	60	NA	promoter-TSS (ENSMUST00000195569.1)	TEC-promoter-TSS (ENSMUST00000195569.1)	-224	ENSMUST00000195569.1	ENSMUSG00000103215	ENSMUST00000195569			Gm38388			TEC
Sox9_E11_Sample1_peak_974	chr1	60609158	60609892	+	60	NA	Intergenic	Intergenic	4278	ENSMUST00000158348.1	ENSMUSG00000088973	ENSMUST00000158348			Gm23762			miRNA
Sox9_E11_Sample1_peak_975	chr1	61135850	61136713	+	133	NA	Intergenic	Intergenic	-12277	ENSMUST00000118999.1	ENSMUSG00000082661	ENSMUST00000118999			Gm11590			processed_pseudogene
Sox9_E11_Sample1_peak_976	chr1	61180920	61181790	+	84	NA	Intergenic	Intergenic	15887	ENSMUST00000120063.1	ENSMUSG00000080785	ENSMUST00000120063			Gm11591			processed_pseudogene
Sox9_E11_Sample1_peak_977	chr1	61203199	61203796	+	85	NA	Intergenic	Intergenic	-6255	ENSMUST00000120063.1	ENSMUSG00000080785	ENSMUST00000120063			Gm11591			processed_pseudogene
Sox9_E11_Sample1_peak_978	chr1	61638516	61639686	+	230	NA	promoter-TSS (ENSMUST00000046673.10)	protein_coding-promoter-TSS (ENSMUST00000046673.10)	-142	ENSMUST00000094906.3	ENSMUSG00000052062	ENSMUST00000138768			Pard3b			protein_coding
Sox9_E11_Sample1_peak_979	chr1	61927410	61928081	+	53	NA	intron (ENSMUST00000046673.10, intron 2 of 21)	protein_coding-intron (ENSMUST00000046673.10, intron 2 of 21)	53462	ENSMUST00000187972.1	ENSMUSG00000100344	ENSMUST00000187972			Gm29640			processed_pseudogene
Sox9_E11_Sample1_peak_980	chr1	62142229	62142771	+	76	NA	intron (ENSMUST00000075374.9, intron 4 of 22)	protein_coding-intron (ENSMUST00000046673.10, intron 4 of 21)	-6391	ENSMUST00000127498.2	ENSMUSG00000085019	ENSMUST00000127498			Pard3bos2			lncRNA
Sox9_E11_Sample1_peak_982	chr1	62405763	62406692	+	79	NA	intron (ENSMUST00000094906.3, intron 18 of 21)	protein_coding-intron (ENSMUST00000046673.10, intron 17 of 21)	93034	ENSMUST00000147177.1	ENSMUSG00000085400	ENSMUST00000147177			Pard3bos3			lncRNA
Sox9_E11_Sample1_peak_984	chr1	62580427	62580885	+	70	NA	intron (ENSMUST00000046673.10, intron 20 of 21)	protein_coding-intron (ENSMUST00000046673.10, intron 20 of 21)	-44714	ENSMUST00000185587.1	ENSMUSG00000100750	ENSMUST00000185587			Gm29084			lncRNA
Sox9_E11_Sample1_peak_985	chr1	62625628	62626903	+	99	NA	intron (ENSMUST00000094906.3, intron 21 of 21)	protein_coding-intron (ENSMUST00000046673.10, intron 21 of 21)	31523	ENSMUST00000119592.1	ENSMUSG00000081950	ENSMUST00000119592			Gm11600			processed_pseudogene
Sox9_E11_Sample1_peak_986	chr1	62631666	62632757	+	88	NA	intron (ENSMUST00000094906.3, intron 21 of 21)	protein_coding-intron (ENSMUST00000046673.10, intron 21 of 21)	25577	ENSMUST00000119592.1	ENSMUSG00000081950	ENSMUST00000119592			Gm11600			processed_pseudogene
Sox9_E11_Sample1_peak_987	chr1	62647854	62648820	+	76	NA	Intergenic	Intergenic	9451	ENSMUST00000119592.1	ENSMUSG00000081950	ENSMUST00000119592			Gm11600			processed_pseudogene
Sox9_E11_Sample1_peak_989	chr1	62703058	62703569	+	60	NA	promoter-TSS (ENSMUST00000027112.12)	protein_coding-promoter-TSS (ENSMUST00000027112.12)	28	ENSMUST00000102822.8	ENSMUSG00000025969	ENSMUST00000075144			Nrp2			protein_coding
Sox9_E11_Sample1_peak_990	chr1	62706407	62707751	+	146	NA	intron (ENSMUST00000126344.1, intron 1 of 2)	protein_coding-intron (ENSMUST00000027112.12, intron 1 of 15)	3377	ENSMUST00000114155.7	ENSMUSG00000025969	ENSMUST00000075144			Nrp2			protein_coding
Sox9_E11_Sample1_peak_991	chr1	62777240	62778047	+	47	NA	intron (ENSMUST00000075144.11, intron 12 of 15)	protein_coding-intron (ENSMUST00000027112.12, intron 12 of 15)	-31659	ENSMUST00000192219.1	ENSMUSG00000103032	ENSMUST00000192219			Gm37121			TEC
Sox9_E11_Sample1_peak_992	chr1	62794547	62796443	+	106	NA	intron (ENSMUST00000075144.11, intron 15 of 15)	protein_coding-intron (ENSMUST00000027112.12, intron 15 of 15)	-13807	ENSMUST00000192219.1	ENSMUSG00000103032	ENSMUST00000192219			Gm37121			TEC
Sox9_E11_Sample1_peak_993	chr1	62813384	62814596	+	229	NA	intron (ENSMUST00000114157.2, intron 16 of 16)	protein_coding-intron (ENSMUST00000063594.12, intron 16 of 16)	4688	ENSMUST00000192219.1	ENSMUSG00000103032	ENSMUST00000192219			Gm37121			TEC
Sox9_E11_Sample1_peak_994	chr1	62827599	62828265	+	46	NA	intron (ENSMUST00000189802.1, intron 1 of 1)	lncRNA-intron (ENSMUST00000189802.1, intron 1 of 1)	4438	ENSMUST00000189802.1	ENSMUSG00000100426	ENSMUST00000189802			Gm4208			lncRNA
Sox9_E11_Sample1_peak_996	chr1	62942267	62943260	+	97	NA	Intergenic	Intergenic	-82979	ENSMUST00000199516.1	ENSMUSG00000104991	ENSMUST00000199516			Gm44468			miRNA
Sox9_E11_Sample1_peak_997	chr1	62947787	62947878	+	26	NA	Intergenic	Intergenic	-77910	ENSMUST00000199516.1	ENSMUSG00000104991	ENSMUST00000199516			Gm44468			miRNA
Sox9_E11_Sample1_peak_998	chr1	62964242	62964689	+	60	NA	intron (ENSMUST00000133236.7, intron 11 of 12)	protein_coding-intron (ENSMUST00000133236.7, intron 11 of 12)	-61277	ENSMUST00000199516.1	ENSMUSG00000104991	ENSMUST00000199516			Gm44468			miRNA
Sox9_E11_Sample1_peak_999	chr1	63004723	63005729	+	181	NA	intron (ENSMUST00000133236.7, intron 9 of 12)	protein_coding-intron (ENSMUST00000133236.7, intron 9 of 12)	-20516	ENSMUST00000199516.1	ENSMUSG00000104991	ENSMUST00000199516			Gm44468			miRNA
Sox9_E11_Sample1_peak_1000	chr1	63113332	63115583	+	180	NA	promoter-TSS (ENSMUST00000137511.7)	protein_coding-promoter-TSS (ENSMUST00000137511.7)	-14	ENSMUST00000138611.7	ENSMUSG00000084799	ENSMUST00000186786			Ino80dos			lncRNA
Sox9_E11_Sample1_peak_1001	chr1	63129817	63130342	+	95	NA	intron (ENSMUST00000188602.1, intron 1 of 3)	lncRNA-intron (ENSMUST00000138611.7, intron 1 of 3)	12961	ENSMUST00000185480.1	ENSMUSG00000101599	ENSMUST00000185480			Gm20342			lncRNA
Sox9_E11_Sample1_peak_1002	chr1	63176384	63177347	+	186	NA	promoter-TSS (ENSMUST00000027108.12)	protein_coding-promoter-TSS (ENSMUST00000027108.12)	-32	ENSMUST00000189664.1	ENSMUSG00000025968	ENSMUST00000187756			Ndufs1			protein_coding
Sox9_E11_Sample1_peak_1004	chr1	63203667	63204895	+	76	NA	intron (ENSMUST00000189722.1, intron 1 of 1)	protein_coding-intron (ENSMUST00000050536.13, intron 2 of 2)	3573	ENSMUST00000189722.1	ENSMUSG00000086730	ENSMUST00000141027			Platr12			lncRNA
Sox9_E11_Sample1_peak_1006	chr1	63247087	63248244	+	147	NA	TTS (ENSMUST00000194370.1)	TEC-TTS (ENSMUST00000194370.1)	834	ENSMUST00000194370.1	ENSMUSG00000102536	ENSMUST00000194370			1700039I01Rik			TEC
Sox9_E11_Sample1_peak_1007	chr1	63272887	63274152	+	144	NA	promoter-TSS (ENSMUST00000151616.1)	lncRNA-promoter-TSS (ENSMUST00000151616.1)	-156	ENSMUST00000174964.1	ENSMUSG00000092705	ENSMUST00000174964			Gm24513			miRNA
Sox9_E11_Sample1_peak_1008	chr1	63445561	63446655	+	139	NA	promoter-TSS (ENSMUST00000114103.7)	protein_coding-promoter-TSS (ENSMUST00000114103.7)	-103	ENSMUST00000114107.2	ENSMUSG00000025964	ENSMUST00000087374			Adam23			protein_coding
Sox9_E11_Sample1_peak_1009	chr1	63730124	63731069	+	227	NA	promoter-TSS (ENSMUST00000027103.6)	protein_coding-promoter-TSS (ENSMUST00000027103.6)	-18	ENSMUST00000027103.6	ENSMUSG00000025962	ENSMUST00000131478			Fastkd2			protein_coding
Sox9_E11_Sample1_peak_1010	chr1	63857873	63858394	+	32	NA	Intergenic	Intergenic	-12555	ENSMUST00000120280.1	ENSMUSG00000080817	ENSMUST00000120280			Gm13751			processed_pseudogene
Sox9_E11_Sample1_peak_1012	chr1	63994012	63994933	+	59	NA	Intergenic	Intergenic	29745	ENSMUST00000133244.1	ENSMUSG00000044689	ENSMUST00000133244			Gm13749			lncRNA
Sox9_E11_Sample1_peak_1013	chr1	64018979	64019386	+	32	NA	Intergenic	Intergenic	23319	ENSMUST00000184798.1	ENSMUSG00000098487	ENSMUST00000184798			Mir6899			miRNA
Sox9_E11_Sample1_peak_1016	chr1	64087978	64089102	+	158	NA	intron (ENSMUST00000149820.1, intron 3 of 3)	protein_coding-intron (ENSMUST00000055001.9, intron 2 of 3)	9886	ENSMUST00000149820.1	ENSMUSG00000086836	ENSMUST00000149820			Gm13748			lncRNA
Sox9_E11_Sample1_peak_1017	chr1	64105471	64106904	+	274	NA	intron (ENSMUST00000114086.7, intron 1 of 3)	protein_coding-intron (ENSMUST00000055001.9, intron 2 of 3)	15295	ENSMUST00000055001.9	ENSMUSG00000025959	ENSMUST00000135075			Klf7			protein_coding
Sox9_E11_Sample1_peak_1018	chr1	64120987	64122586	+	342	NA	promoter-TSS (ENSMUST00000055001.9)	protein_coding-promoter-TSS (ENSMUST00000055001.9)	-295	ENSMUST00000114086.7	ENSMUSG00000025959	ENSMUST00000135075			Klf7			protein_coding
Sox9_E11_Sample1_peak_1019	chr1	64226029	64226692	+	130	NA	intron (ENSMUST00000190863.1, intron 1 of 1)	lncRNA-intron (ENSMUST00000190863.1, intron 1 of 1)	76159	ENSMUST00000117621.1	ENSMUSG00000086721	ENSMUST00000117621			Gm13750			processed_pseudogene
Sox9_E11_Sample1_peak_1020	chr1	64337866	64338353	+	32	NA	Intergenic	Intergenic	-35066	ENSMUST00000190863.1	ENSMUSG00000101895	ENSMUST00000190863			Gm28981			lncRNA
Sox9_E11_Sample1_peak_1021	chr1	64381182	64381588	+	39	NA	Intergenic	Intergenic	-14949	ENSMUST00000175487.1	ENSMUSG00000093228	ENSMUST00000175487			Gm25748			miRNA
Sox9_E11_Sample1_peak_1022	chr1	64532022	64533528	+	457	NA	promoter-TSS (ENSMUST00000049932.11)	protein_coding-promoter-TSS (ENSMUST00000049932.11)	-22	ENSMUST00000171164.7	ENSMUSG00000025958	ENSMUST00000190876			Creb1			protein_coding
Sox9_E11_Sample1_peak_1023	chr1	64616690	64617869	+	451	NA	promoter-TSS (ENSMUST00000053469.1)	protein_coding-promoter-TSS (ENSMUST00000053469.1)	-37	ENSMUST00000114079.8	ENSMUSG00000025956	ENSMUST00000053469			Mettl21a			protein_coding
Sox9_E11_Sample1_peak_1024	chr1	64690046	64691763	+	451	NA	promoter-TSS (ENSMUST00000094898.4)	protein_coding-promoter-TSS (ENSMUST00000094898.4)	82	ENSMUST00000187170.6	ENSMUSG00000070871	ENSMUST00000114077			Ccnyl1			protein_coding
Sox9_E11_Sample1_peak_1025	chr1	64736606	64738806	+	326	NA	promoter-TSS (ENSMUST00000063982.6)	protein_coding-promoter-TSS (ENSMUST00000063982.6)	43	ENSMUST00000116133.3	ENSMUSG00000045005	ENSMUST00000063982			Fzd5			protein_coding
Sox9_E11_Sample1_peak_1026	chr1	64756621	64757700	+	100	NA	Intergenic	Intergenic	-19409	ENSMUST00000063982.6	ENSMUSG00000045005	ENSMUST00000063982			Fzd5			protein_coding
Sox9_E11_Sample1_peak_1027	chr1	64773050	64773964	+	140	NA	Intergenic	Intergenic	-35756	ENSMUST00000063982.6	ENSMUSG00000045005	ENSMUST00000063982			Fzd5			protein_coding
Sox9_E11_Sample1_peak_1028	chr1	64787689	64788185	+	30	NA	intron (ENSMUST00000139649.7, intron 8 of 8)	protein_coding-intron (ENSMUST00000139649.7, intron 8 of 8)	48827	ENSMUST00000187188.1	ENSMUSG00000051344	ENSMUST00000140857			Plekhm3			protein_coding
Sox9_E11_Sample1_peak_1029	chr1	64808790	64809882	+	230	NA	intron (ENSMUST00000187188.1, intron 2 of 2)	protein_coding-intron (ENSMUST00000097713.1, intron 7 of 7)	27428	ENSMUST00000187188.1	ENSMUSG00000051344	ENSMUST00000140857			Plekhm3			protein_coding
Sox9_E11_Sample1_peak_1030	chr1	64829181	64829861	+	47	NA	intron (ENSMUST00000139649.7, intron 6 of 8)	protein_coding-intron (ENSMUST00000097713.1, intron 6 of 7)	7243	ENSMUST00000187188.1	ENSMUSG00000051344	ENSMUST00000140857			Plekhm3			protein_coding
Sox9_E11_Sample1_peak_1032	chr1	64853968	64854478	+	54	NA	intron (ENSMUST00000139649.7, intron 6 of 8)	protein_coding-intron (ENSMUST00000097713.1, intron 6 of 7)	-17459	ENSMUST00000187188.1	ENSMUSG00000051344	ENSMUST00000140857			Plekhm3			protein_coding
Sox9_E11_Sample1_peak_1033	chr1	64859644	64860472	+	84	NA	TTS (ENSMUST00000140857.1)	protein_coding-TTS (ENSMUST00000140857.1)	-23294	ENSMUST00000187188.1	ENSMUSG00000051344	ENSMUST00000140857			Plekhm3			protein_coding
Sox9_E11_Sample1_peak_1035	chr1	64917890	64917899	+	39	NA	intron (ENSMUST00000140857.1, intron 2 of 4)	protein_coding-intron (ENSMUST00000097713.1, intron 3 of 7)	10203	ENSMUST00000140857.1	ENSMUSG00000051344	ENSMUST00000140857			Plekhm3			protein_coding
Sox9_E11_Sample1_peak_1035-2	chr1	64918365	64919074	+	39	NA	intron (ENSMUST00000140857.1, intron 2 of 4)	protein_coding-intron (ENSMUST00000097713.1, intron 3 of 7)	9378	ENSMUST00000140857.1	ENSMUSG00000051344	ENSMUST00000140857			Plekhm3			protein_coding
Sox9_E11_Sample1_peak_1036	chr1	64949144	64949977	+	102	NA	intron (ENSMUST00000097713.1, intron 1 of 7)	protein_coding-intron (ENSMUST00000097713.1, intron 1 of 7)	7167	ENSMUST00000134097.1	ENSMUSG00000051344	ENSMUST00000140857			Plekhm3			protein_coding
Sox9_E11_Sample1_peak_1037	chr1	64956253	64957194	+	148	NA	promoter-TSS (ENSMUST00000123225.1)	protein_coding-promoter-TSS (ENSMUST00000123225.1)	4	ENSMUST00000134097.1	ENSMUSG00000051344	ENSMUST00000140857			Plekhm3			protein_coding
Sox9_E11_Sample1_peak_1038	chr1	65112244	65113018	+	96	NA	intron (ENSMUST00000148020.7, intron 5 of 7)	protein_coding-intron (ENSMUST00000050047.3, intron 5 of 7)	6927	ENSMUST00000144760.2	ENSMUSG00000100846	ENSMUST00000144760			Gm28845			protein_coding
Sox9_E11_Sample1_peak_1039	chr1	65163875	65164282	+	46	NA	intron (ENSMUST00000097709.10, intron 6 of 8)	protein_coding-intron (ENSMUST00000097709.10, intron 6 of 8)	11486	ENSMUST00000149310.7	ENSMUSG00000025950	ENSMUST00000097709			Idh1			protein_coding
Sox9_E11_Sample1_peak_1040	chr1	65178155	65180034	+	565	NA	promoter-TSS (ENSMUST00000097709.10)	protein_coding-promoter-TSS (ENSMUST00000097709.10)	87	ENSMUST00000097709.10	ENSMUSG00000025950	ENSMUST00000097709			Idh1			protein_coding
Sox9_E11_Sample1_peak_1041	chr1	65186058	65187182	+	354	NA	promoter-TSS (ENSMUST00000081154.13)	protein_coding-promoter-TSS (ENSMUST00000081154.13)	-63	ENSMUST00000185317.6	ENSMUSG00000025949	ENSMUST00000081154			Pikfyve			protein_coding
Sox9_E11_Sample1_peak_1043	chr1	65311216	65313085	+	119	NA	intron (ENSMUST00000027083.6, intron 1 of 12)	protein_coding-intron (ENSMUST00000027083.6, intron 1 of 12)	893	ENSMUST00000027083.6	ENSMUSG00000025946	ENSMUST00000027083			Pth2r			protein_coding
Sox9_E11_Sample1_peak_1044	chr1	65352655	65353652	+	224	NA	intron (ENSMUST00000027083.6, intron 8 of 12)	protein_coding-intron (ENSMUST00000027083.6, intron 8 of 12)	41896	ENSMUST00000027083.6	ENSMUSG00000025946	ENSMUST00000027083			Pth2r			protein_coding
Sox9_E11_Sample1_peak_1046	chr1	65439998	65440691	+	158	NA	Intergenic	Intergenic	-1359	ENSMUST00000187755.1	ENSMUSG00000100340	ENSMUST00000187755			Gm28923			processed_pseudogene
Sox9_E11_Sample1_peak_1047	chr1	65535299	65536262	+	252	NA	Intergenic	Intergenic	-11705	ENSMUST00000189087.1	ENSMUSG00000099819	ENSMUST00000189087			Gm28728			processed_pseudogene
Sox9_E11_Sample1_peak_1049	chr1	66003981	66004638	+	69	NA	Intergenic	Intergenic	28616	ENSMUST00000119367.1	ENSMUSG00000081623	ENSMUST00000119367			Gm8809			processed_pseudogene
Sox9_E11_Sample1_peak_1050	chr1	66174753	66176076	+	423	NA	promoter-TSS (ENSMUST00000114015.7)	protein_coding-promoter-TSS (ENSMUST00000114015.7)	-57	ENSMUST00000124873.7	ENSMUSG00000015222	ENSMUST00000141148			Map2			protein_coding
Sox9_E11_Sample1_peak_1051	chr1	66186879	66187483	+	53	NA	intron (ENSMUST00000124873.7, intron 1 of 3)	protein_coding-intron (ENSMUST00000114015.7, intron 1 of 13)	11631	ENSMUST00000125844.1	ENSMUSG00000015222	ENSMUST00000141148			Map2			protein_coding
Sox9_E11_Sample1_peak_1052	chr1	66251843	66252463	+	39	NA	intron (ENSMUST00000024639.11, intron 1 of 11)	protein_coding-intron (ENSMUST00000024639.11, intron 1 of 11)	491	ENSMUST00000024639.11	ENSMUSG00000015222	ENSMUST00000141148			Map2			protein_coding
Sox9_E11_Sample1_peak_1053	chr1	66467877	66468626	+	243	NA	promoter-TSS (ENSMUST00000061620.16)	protein_coding-promoter-TSS (ENSMUST00000061620.16)	-116	ENSMUST00000061620.16	ENSMUSG00000055567	ENSMUST00000061620			Unc80			protein_coding
Sox9_E11_Sample1_peak_1054	chr1	66647875	66648338	+	32	NA	intron (ENSMUST00000061620.16, intron 44 of 64)	protein_coding-intron (ENSMUST00000061620.16, intron 44 of 64)	-25624	ENSMUST00000187179.1	ENSMUSG00000055567	ENSMUST00000061620			Unc80			protein_coding
Sox9_E11_Sample1_peak_1055	chr1	66654862	66655970	+	508	NA	intron (ENSMUST00000212557.2, intron 50 of 63)	protein_coding-intron (ENSMUST00000061620.16, intron 51 of 64)	-18314	ENSMUST00000187179.1	ENSMUSG00000055567	ENSMUST00000061620			Unc80			protein_coding
Sox9_E11_Sample1_peak_1057	chr1	66700688	66701543	+	575	NA	exon (ENSMUST00000151016.1, exon 1 of 4)	protein_coding-exon (ENSMUST00000151016.1, exon 1 of 4)	208	ENSMUST00000190404.1	ENSMUSG00000026005	ENSMUST00000142920			Rpe			protein_coding
Sox9_E11_Sample1_peak_1058	chr1	66816269	66818182	+	447	NA	intron (ENSMUST00000113987.1, intron 1 of 7)	protein_coding-intron (ENSMUST00000068168.9, intron 1 of 13)	321	ENSMUST00000189846.1	ENSMUSG00000026004	ENSMUST00000068168			Kansl1l			protein_coding
Sox9_E11_Sample1_peak_1059	chr1	66832527	66833531	+	68	NA	intron (ENSMUST00000027153.5, intron 10 of 10)	protein_coding-intron (ENSMUST00000027153.5, intron 10 of 10)	-7115	ENSMUST00000193555.1	ENSMUSG00000103553	ENSMUST00000193555			Gm38218			TEC
Sox9_E11_Sample1_peak_1060	chr1	66838463	66838908	+	22	NA	intron (ENSMUST00000027153.5, intron 8 of 10)	protein_coding-intron (ENSMUST00000027153.5, intron 8 of 10)	10917	ENSMUST00000121857.1	ENSMUSG00000082769	ENSMUST00000121857			Gm15793			processed_pseudogene
Sox9_E11_Sample1_peak_1061	chr1	66862333	66863706	+	415	NA	intron (ENSMUST00000027153.5, intron 1 of 10)	protein_coding-intron (ENSMUST00000027153.5, intron 1 of 10)	258	ENSMUST00000027153.5	ENSMUSG00000026003	ENSMUST00000139208			Acadl			protein_coding
Sox9_E11_Sample1_peak_1062	chr1	66895905	66896555	+	168	NA	Intergenic	Intergenic	29433	ENSMUST00000104140.1	ENSMUSG00000077328	ENSMUST00000104140			Gm25832			snoRNA
Sox9_E11_Sample1_peak_1063	chr1	66960657	66961125	+	76	NA	Intergenic	Intergenic	9062	ENSMUST00000121328.1	ENSMUSG00000082212	ENSMUST00000121328			Gm15826			processed_pseudogene
Sox9_E11_Sample1_peak_1064	chr1	66996684	66997616	+	125	NA	Intergenic	Intergenic	23915	ENSMUST00000133508.1	ENSMUSG00000026000	ENSMUST00000133508			Lancl1			protein_coding
Sox9_E11_Sample1_peak_1066	chr1	67020416	67021159	+	133	NA	exon (ENSMUST00000189210.1, exon 1 of 1)	protein_coding-exon (ENSMUST00000189210.1, exon 1 of 1)	278	ENSMUST00000133508.1	ENSMUSG00000026000	ENSMUST00000133508			Lancl1			protein_coding
Sox9_E11_Sample1_peak_1067	chr1	67032081	67032916	+	81	NA	intron (ENSMUST00000119559.7, intron 3 of 9)	protein_coding-intron (ENSMUST00000027149.11, intron 3 of 9)	6336	ENSMUST00000149996.1	ENSMUSG00000026000	ENSMUST00000133508			Lancl1			protein_coding
Sox9_E11_Sample1_peak_1068	chr1	67038289	67039199	+	382	NA	promoter-TSS (ENSMUST00000119559.7)	protein_coding-promoter-TSS (ENSMUST00000119559.7)	90	ENSMUST00000149996.1	ENSMUSG00000026000	ENSMUST00000133508			Lancl1			protein_coding
Sox9_E11_Sample1_peak_1069	chr1	67061042	67062235	+	155	NA	Intergenic	Intergenic	-22766	ENSMUST00000113979.9	ENSMUSG00000026000	ENSMUST00000133508			Lancl1			protein_coding
Sox9_E11_Sample1_peak_1070	chr1	67077632	67078577	+	95	NA	Intergenic	Intergenic	-39232	ENSMUST00000113979.9	ENSMUSG00000026000	ENSMUST00000133508			Lancl1			protein_coding
Sox9_E11_Sample1_peak_1071	chr1	67268161	67268540	+	60	NA	intron (ENSMUST00000140506.1, intron 3 of 4)	lncRNA-intron (ENSMUST00000140506.1, intron 3 of 4)	11126	ENSMUST00000104557.1	ENSMUSG00000077745	ENSMUST00000104557			Gm26342			snoRNA
Sox9_E11_Sample1_peak_1072	chr1	67640519	67640985	+	93	NA	Intergenic	Intergenic	23777	ENSMUST00000174899.2	ENSMUSG00000095282	ENSMUST00000174899			Gm22548			miRNA
Sox9_E11_Sample1_peak_1073	chr1	68049788	68050626	+	123	NA	intron (ENSMUST00000119142.7, intron 25 of 27)	protein_coding-intron (ENSMUST00000119142.7, intron 25 of 27)	25964	ENSMUST00000124160.3	ENSMUSG00000087329	ENSMUST00000124160			Gm15671			lncRNA
Sox9_E11_Sample1_peak_1075	chr1	68779951	68781168	+	281	NA	intron (ENSMUST00000153432.1, intron 1 of 18)	protein_coding-intron (ENSMUST00000119142.7, intron 1 of 27)	-18832	ENSMUST00000195066.1	ENSMUSG00000103809	ENSMUST00000195066			Gm37061			TEC
Sox9_E11_Sample1_peak_1076	chr1	68956972	68957648	+	127	NA	intron (ENSMUST00000153432.1, intron 1 of 18)	protein_coding-intron (ENSMUST00000119142.7, intron 1 of 27)	149430	ENSMUST00000140116.1	ENSMUSG00000087514	ENSMUST00000140116			Gm16076			lncRNA
Sox9_E11_Sample1_peak_1078	chr1	69105651	69108773	+	188	NA	promoter-TSS (ENSMUST00000140116.1)	lncRNA-promoter-TSS (ENSMUST00000140116.1)	-472	ENSMUST00000140116.1	ENSMUSG00000087514	ENSMUST00000140116			Gm16076			lncRNA
Sox9_E11_Sample1_peak_1080	chr1	69209964	69210682	+	85	NA	Intergenic	Intergenic	-79024	ENSMUST00000122454.1	ENSMUSG00000084332	ENSMUST00000122454			Gm8840			processed_pseudogene
Sox9_E11_Sample1_peak_1081	chr1	69241946	69242448	+	60	NA	Intergenic	Intergenic	-110898	ENSMUST00000122454.1	ENSMUSG00000084332	ENSMUST00000122454			Gm8840			processed_pseudogene
Sox9_E11_Sample1_peak_1083	chr1	69367843	69368445	+	60	NA	Intergenic	Intergenic	-9177	ENSMUST00000187740.1	ENSMUSG00000101387	ENSMUST00000187740			Pced1c-ps			processed_pseudogene
Sox9_E11_Sample1_peak_1084	chr1	69433560	69434526	+	219	NA	Intergenic	Intergenic	-7013	ENSMUST00000189646.1	ENSMUSG00000099804	ENSMUST00000189646			Gm28497			lncRNA
Sox9_E11_Sample1_peak_1086	chr1	69466680	69467249	+	113	NA	Intergenic	Intergenic	25908	ENSMUST00000189646.1	ENSMUSG00000099804	ENSMUST00000189646			Gm28497			lncRNA
Sox9_E11_Sample1_peak_1087	chr1	69470630	69471277	+	72	NA	Intergenic	Intergenic	22835	ENSMUST00000185991.1	ENSMUSG00000100354	ENSMUST00000185991			Gm29113			lncRNA
Sox9_E11_Sample1_peak_1088	chr1	69513544	69514114	+	77	NA	promoter-TSS (ENSMUST00000187100.1)	lncRNA-promoter-TSS (ENSMUST00000187100.1)	-103	ENSMUST00000187100.1	ENSMUSG00000101156	ENSMUST00000187100			Gm29114			lncRNA
Sox9_E11_Sample1_peak_1089	chr1	69578000	69578540	+	46	NA	intron (ENSMUST00000027146.8, intron 3 of 7)	protein_coding-intron (ENSMUST00000027146.8, intron 3 of 7)	20252	ENSMUST00000188962.1	ENSMUSG00000100815	ENSMUST00000188962			Gm29112			lncRNA
Sox9_E11_Sample1_peak_1090	chr1	69610513	69611564	+	216	NA	intron (ENSMUST00000027146.8, intron 3 of 7)	protein_coding-intron (ENSMUST00000027146.8, intron 3 of 7)	-12516	ENSMUST00000188962.1	ENSMUSG00000100815	ENSMUST00000188962			Gm29112			lncRNA
Sox9_E11_Sample1_peak_1091	chr1	69656774	69658052	+	99	NA	intron (ENSMUST00000027146.8, intron 3 of 7)	protein_coding-intron (ENSMUST00000027146.8, intron 3 of 7)	4648	ENSMUST00000190898.1	ENSMUSG00000099954	ENSMUST00000190898			Gm28112			lncRNA
Sox9_E11_Sample1_peak_1092	chr1	69685928	69687953	+	311	NA	intron (ENSMUST00000187184.6, intron 1 of 8)	protein_coding-intron (ENSMUST00000187184.6, intron 1 of 8)	200	ENSMUST00000188919.1	ENSMUSG00000025997	ENSMUST00000027146			Ikzf2			protein_coding
Sox9_E11_Sample1_peak_1093	chr1	69688626	69689158	+	36	NA	Intergenic	Intergenic	-1647	ENSMUST00000187184.6	ENSMUSG00000025997	ENSMUST00000027146			Ikzf2			protein_coding
Sox9_E11_Sample1_peak_1094	chr1	69728177	69729146	+	81	NA	Intergenic	Intergenic	-41416	ENSMUST00000187184.6	ENSMUSG00000025997	ENSMUST00000027146			Ikzf2			protein_coding
Sox9_E11_Sample1_peak_1096	chr1	69786817	69787478	+	77	NA	Intergenic	Intergenic	16279	ENSMUST00000194308.1	ENSMUSG00000103402	ENSMUST00000194308			Gm37930			TEC
Sox9_E11_Sample1_peak_1097	chr1	69826430	69827308	+	201	NA	promoter-TSS (ENSMUST00000065425.11)	protein_coding-promoter-TSS (ENSMUST00000065425.11)	-101	ENSMUST00000187159.6	ENSMUSG00000053153	ENSMUST00000190833			Spag16			protein_coding
Sox9_E11_Sample1_peak_1098	chr1	70754658	70755768	+	87	NA	intron (ENSMUST00000162182.1, intron 5 of 5)	protein_coding-intron (ENSMUST00000053922.11, intron 3 of 3)	29290	ENSMUST00000162182.1	ENSMUSG00000045648	ENSMUST00000161937			Vwc2l			protein_coding
Sox9_E11_Sample1_peak_1099	chr1	71102188	71103638	+	507	NA	exon (ENSMUST00000027393.7, exon 1 of 11)	protein_coding-exon (ENSMUST00000027393.7, exon 1 of 11)	233	ENSMUST00000027393.7	ENSMUSG00000026196	ENSMUST00000027393			Bard1			protein_coding
Sox9_E11_Sample1_peak_1102	chr1	71432475	71433000	+	93	NA	Intergenic	Intergenic	-17827	ENSMUST00000087268.6	ENSMUSG00000050296	ENSMUST00000189102			Abca12			protein_coding
Sox9_E11_Sample1_peak_1103	chr1	71556803	71557865	+	423	NA	exon (ENSMUST00000187982.1, exon 1 of 1)	protein_coding-exon (ENSMUST00000187982.1, exon 1 of 1)	121	ENSMUST00000136443.1	ENSMUSG00000026192	ENSMUST00000154855			Atic			protein_coding
Sox9_E11_Sample1_peak_1105	chr1	71652606	71654096	+	545	NA	promoter-TSS (ENSMUST00000055226.12)	protein_coding-promoter-TSS (ENSMUST00000055226.12)	12	ENSMUST00000125934.1	ENSMUSG00000073652	ENSMUST00000125934			Apol7d			lncRNA
Sox9_E11_Sample1_peak_1106	chr1	71723277	71724275	+	134	NA	Intergenic	Intergenic	-8852	ENSMUST00000191412.1	ENSMUSG00000100319	ENSMUST00000191412			Gm5256			processed_pseudogene
Sox9_E11_Sample1_peak_1107	chr1	71764912	71765343	+	52	NA	Intergenic	Intergenic	-50203	ENSMUST00000191412.1	ENSMUSG00000100319	ENSMUST00000191412			Gm5256			processed_pseudogene
Sox9_E11_Sample1_peak_1109	chr1	71886464	71887253	+	81	NA	Intergenic	Intergenic	-1254	ENSMUST00000189680.6	ENSMUSG00000099707	ENSMUST00000188676			Gm8883			lncRNA
Sox9_E11_Sample1_peak_1110	chr1	71893358	71894230	+	76	NA	TTS (ENSMUST00000187553.1)	lncRNA-TTS (ENSMUST00000187553.1)	5141	ENSMUST00000189983.1	ENSMUSG00000101211	ENSMUST00000187553			Gm28818			lncRNA
Sox9_E11_Sample1_peak_1111	chr1	71936343	71938344	+	114	NA	Intergenic	Intergenic	-20218	ENSMUST00000187553.1	ENSMUSG00000101211	ENSMUST00000187553			Gm28818			lncRNA
Sox9_E11_Sample1_peak_1113	chr1	72123557	72124088	+	93	NA	Intergenic	Intergenic	-1821	ENSMUST00000191139.1	ENSMUSG00000102123	ENSMUST00000191139			Gm4319			lncRNA
Sox9_E11_Sample1_peak_1115	chr1	72165644	72166154	+	37	NA	intron (ENSMUST00000048860.8, intron 2 of 4)	protein_coding-intron (ENSMUST00000048860.8, intron 2 of 4)	-43898	ENSMUST00000191139.1	ENSMUSG00000102123	ENSMUST00000191139			Gm4319			lncRNA
Sox9_E11_Sample1_peak_1116	chr1	72173467	72174346	+	68	NA	intron (ENSMUST00000048860.8, intron 2 of 4)	protein_coding-intron (ENSMUST00000048860.8, intron 2 of 4)	38401	ENSMUST00000048860.8	ENSMUSG00000039395	ENSMUST00000048860			Mreg			protein_coding
Sox9_E11_Sample1_peak_1117	chr1	72182631	72183701	+	81	NA	intron (ENSMUST00000048860.8, intron 2 of 4)	protein_coding-intron (ENSMUST00000048860.8, intron 2 of 4)	29141	ENSMUST00000048860.8	ENSMUSG00000039395	ENSMUST00000048860			Mreg			protein_coding
Sox9_E11_Sample1_peak_1118	chr1	72211623	72212581	+	165	NA	exon (ENSMUST00000048860.8, exon 1 of 5)	protein_coding-exon (ENSMUST00000048860.8, exon 1 of 5)	205	ENSMUST00000048860.8	ENSMUSG00000039395	ENSMUST00000048860			Mreg			protein_coding
Sox9_E11_Sample1_peak_1119	chr1	72225709	72226941	+	299	NA	promoter-TSS (ENSMUST00000178786.1)	snRNA-promoter-TSS (ENSMUST00000178786.1)	85	ENSMUST00000178786.1	ENSMUSG00000094655	ENSMUST00000178786			Gm25360			snRNA
Sox9_E11_Sample1_peak_1120	chr1	72236349	72237448	+	274	NA	promoter-TSS (ENSMUST00000101806.2)	snRNA-promoter-TSS (ENSMUST00000101806.2)	-48	ENSMUST00000101806.2	ENSMUSG00000094050	ENSMUST00000101806			Gm23472			snRNA
Sox9_E11_Sample1_peak_1121	chr1	72243666	72244781	+	282	NA	promoter-TSS (ENSMUST00000177868.1)	snRNA-promoter-TSS (ENSMUST00000177868.1)	10	ENSMUST00000177868.1	ENSMUSG00000093956	ENSMUST00000177868			Gm24497			snRNA
Sox9_E11_Sample1_peak_1122	chr1	72254653	72255850	+	399	NA	TTS (ENSMUST00000179876.1)	snRNA-TTS (ENSMUST00000179876.1)	243	ENSMUST00000179876.1	ENSMUSG00000093843	ENSMUST00000179876			Gm25939			snRNA
Sox9_E11_Sample1_peak_1123	chr1	72283913	72284456	+	229	NA	promoter-TSS (ENSMUST00000027380.11)	protein_coding-promoter-TSS (ENSMUST00000027380.11)	75	ENSMUST00000134840.7	ENSMUSG00000026189	ENSMUST00000134840			Pecr			protein_coding
Sox9_E11_Sample1_peak_1124	chr1	72307000	72307700	+	210	NA	promoter-TSS (ENSMUST00000027379.9)	protein_coding-promoter-TSS (ENSMUST00000027379.9)	-77	ENSMUST00000027379.9	ENSMUSG00000026187	ENSMUST00000027379			Xrcc5			protein_coding
Sox9_E11_Sample1_peak_1125	chr1	72316332	72317087	+	211	NA	intron (ENSMUST00000027379.9, intron 5 of 20)	protein_coding-intron (ENSMUST00000027379.9, intron 5 of 20)	9282	ENSMUST00000027379.9	ENSMUSG00000026187	ENSMUST00000027379			Xrcc5			protein_coding
Sox9_E11_Sample1_peak_1126	chr1	72400042	72400708	+	60	NA	Intergenic	Intergenic	-59124	ENSMUST00000146593.1	ENSMUSG00000085812	ENSMUST00000146593			Gm15843			processed_pseudogene
Sox9_E11_Sample1_peak_1127	chr1	72536594	72537386	+	53	NA	promoter-TSS (ENSMUST00000047786.5)	protein_coding-promoter-TSS (ENSMUST00000047786.5)	-60	ENSMUST00000047786.5	ENSMUSG00000039372	ENSMUST00000047786			2021-03-04			protein_coding
Sox9_E11_Sample1_peak_1128	chr1	72582849	72583743	+	290	NA	promoter-TSS (ENSMUST00000047615.14)	protein_coding-promoter-TSS (ENSMUST00000047615.14)	45	ENSMUST00000156797.7	ENSMUSG00000039354	ENSMUST00000145868			Smarcal1			protein_coding
Sox9_E11_Sample1_peak_1130	chr1	72672890	72673613	+	120	NA	intron (ENSMUST00000212573.1, intron 9 of 22)	protein_coding-intron (ENSMUST00000053499.5, intron 10 of 23)	-19613	ENSMUST00000211962.1	ENSMUSG00000110487	ENSMUST00000211962			Gm18035			processed_pseudogene
Sox9_E11_Sample1_peak_1131	chr1	72710950	72711915	+	135	NA	promoter-TSS (ENSMUST00000211963.1)	protein_coding-promoter-TSS (ENSMUST00000211963.1)	118	ENSMUST00000212432.1	ENSMUSG00000046330	ENSMUST00000212335			Rpl37a			protein_coding
Sox9_E11_Sample1_peak_1133	chr1	72761177	72761706	+	76	NA	Intergenic	Intergenic	49660	ENSMUST00000211963.1	ENSMUSG00000046330	ENSMUST00000212335			Rpl37a			protein_coding
Sox9_E11_Sample1_peak_1134	chr1	72778785	72779299	+	76	NA	Intergenic	Intergenic	-45461	ENSMUST00000047328.10	ENSMUSG00000039323	ENSMUST00000120564			Igfbp2			protein_coding
Sox9_E11_Sample1_peak_1135	chr1	72806068	72806526	+	69	NA	Intergenic	Intergenic	-18206	ENSMUST00000047328.10	ENSMUSG00000039323	ENSMUST00000120564			Igfbp2			protein_coding
Sox9_E11_Sample1_peak_1136	chr1	72813526	72814385	+	46	NA	Intergenic	Intergenic	-10548	ENSMUST00000047328.10	ENSMUSG00000039323	ENSMUST00000120564			Igfbp2			protein_coding
Sox9_E11_Sample1_peak_1137	chr1	72823838	72825395	+	127	NA	promoter-TSS (ENSMUST00000120564.1)	protein_coding-promoter-TSS (ENSMUST00000120564.1)	113	ENSMUST00000047328.10	ENSMUSG00000039323	ENSMUST00000120564			Igfbp2			protein_coding
Sox9_E11_Sample1_peak_1138	chr1	72854792	72855615	+	70	NA	Intergenic	Intergenic	6504	ENSMUST00000155703.1	ENSMUSG00000039323	ENSMUST00000120564			Igfbp2			protein_coding
Sox9_E11_Sample1_peak_1139	chr1	72870480	72871298	+	41	NA	intron (ENSMUST00000027377.8, intron 1 of 3)	protein_coding-intron (ENSMUST00000027377.8, intron 1 of 3)	3386	ENSMUST00000137339.1	ENSMUSG00000026185	ENSMUST00000137339			Igfbp5			protein_coding
Sox9_E11_Sample1_peak_1140	chr1	72872697	72873978	+	75	NA	intron (ENSMUST00000027377.8, intron 1 of 3)	protein_coding-intron (ENSMUST00000027377.8, intron 1 of 3)	938	ENSMUST00000137339.1	ENSMUSG00000026185	ENSMUST00000137339			Igfbp5			protein_coding
Sox9_E11_Sample1_peak_1140-2	chr1	72874577	72875173	+	75	NA	promoter-TSS (ENSMUST00000027377.8)	protein_coding-promoter-TSS (ENSMUST00000027377.8)	9	ENSMUST00000027377.8	ENSMUSG00000026185	ENSMUST00000137339			Igfbp5			protein_coding
Sox9_E11_Sample1_peak_1142	chr1	72929662	72930195	+	85	NA	Intergenic	Intergenic	-54916	ENSMUST00000188793.1	ENSMUSG00000101968	ENSMUST00000190525			1700027A15Rik			lncRNA
Sox9_E11_Sample1_peak_1143	chr1	72944744	72946021	+	192	NA	Intergenic	Intergenic	-39462	ENSMUST00000188793.1	ENSMUSG00000101968	ENSMUST00000190525			1700027A15Rik			lncRNA
Sox9_E11_Sample1_peak_1144	chr1	73026832	73027829	+	102	NA	Intergenic	Intergenic	2761	ENSMUST00000190525.1	ENSMUSG00000101968	ENSMUST00000190525			1700027A15Rik			lncRNA
Sox9_E11_Sample1_peak_1145	chr1	73116404	73117335	+	130	NA	Intergenic	Intergenic	92300	ENSMUST00000190525.1	ENSMUSG00000101968	ENSMUST00000190525			1700027A15Rik			lncRNA
Sox9_E11_Sample1_peak_1146	chr1	73169778	73171080	+	53	NA	Intergenic	Intergenic	38994	ENSMUST00000194107.1	ENSMUSG00000102266	ENSMUST00000194107			Gm38106			TEC
Sox9_E11_Sample1_peak_1147	chr1	73251817	73252344	+	76	NA	Intergenic	Intergenic	-16984	ENSMUST00000190578.1	ENSMUSG00000101112	ENSMUST00000190578			Gm29185			lncRNA
Sox9_E11_Sample1_peak_1148	chr1	73306965	73307994	+	270	NA	Intergenic	Intergenic	4571	ENSMUST00000190038.1	ENSMUSG00000100697	ENSMUST00000190038			Gm29184			processed_pseudogene
Sox9_E11_Sample1_peak_1149	chr1	73362855	73363996	+	98	NA	Intergenic	Intergenic	-28821	ENSMUST00000183977.1	ENSMUSG00000098697	ENSMUST00000183977			Gm27315			misc_RNA
Sox9_E11_Sample1_peak_1150	chr1	73479230	73480215	+	115	NA	Intergenic	Intergenic	-32324	ENSMUST00000185703.1	ENSMUSG00000100044	ENSMUST00000185703			Gm9553			processed_pseudogene
Sox9_E11_Sample1_peak_1151	chr1	73681954	73682125	+	30	NA	intron (ENSMUST00000189514.1, intron 6 of 8)	lncRNA-intron (ENSMUST00000189514.1, intron 6 of 8)	61908	ENSMUST00000191114.6	ENSMUSG00000100301	ENSMUST00000191114			6030407O03Rik			lncRNA
Sox9_E11_Sample1_peak_1152	chr1	73683275	73684121	+	93	NA	intron (ENSMUST00000189514.1, intron 6 of 8)	lncRNA-intron (ENSMUST00000189514.1, intron 6 of 8)	60249	ENSMUST00000191114.6	ENSMUSG00000100301	ENSMUST00000191114			6030407O03Rik			lncRNA
Sox9_E11_Sample1_peak_1153	chr1	73744144	73744563	+	60	NA	promoter-TSS (ENSMUST00000191114.6)	lncRNA-promoter-TSS (ENSMUST00000191114.6)	-406	ENSMUST00000191114.6	ENSMUSG00000100301	ENSMUST00000191114			6030407O03Rik			lncRNA
Sox9_E11_Sample1_peak_1154	chr1	73826039	73826552	+	131	NA	intron (ENSMUST00000188600.1, intron 2 of 7)	lncRNA-intron (ENSMUST00000188600.1, intron 2 of 7)	15622	ENSMUST00000188600.1	ENSMUSG00000101344	ENSMUST00000188600			Gm29183			lncRNA
Sox9_E11_Sample1_peak_1155	chr1	73862531	73863303	+	122	NA	exon (ENSMUST00000189514.1, exon 2 of 9)	lncRNA-exon (ENSMUST00000189514.1, exon 2 of 9)	1549	ENSMUST00000189514.1	ENSMUSG00000100301	ENSMUST00000191114			6030407O03Rik			lncRNA
Sox9_E11_Sample1_peak_1156	chr1	73914211	73915060	+	76	NA	exon (ENSMUST00000169786.7, exon 35 of 35)	protein_coding-exon (ENSMUST00000169786.7, exon 35 of 35)	13582	ENSMUST00000191527.6	ENSMUSG00000055322	ENSMUST00000169786			Tns1			protein_coding
Sox9_E11_Sample1_peak_1157	chr1	73932588	73933407	+	60	NA	intron (ENSMUST00000187584.6, intron 22 of 32)	protein_coding-intron (ENSMUST00000169786.7, intron 24 of 34)	-2186	ENSMUST00000185264.6	ENSMUSG00000055322	ENSMUST00000169786			Tns1			protein_coding
Sox9_E11_Sample1_peak_1158	chr1	73962797	73963456	+	90	NA	promoter-TSS (ENSMUST00000191367.1)	protein_coding-promoter-TSS (ENSMUST00000191367.1)	-83	ENSMUST00000191367.1	ENSMUSG00000055322	ENSMUST00000169786			Tns1			protein_coding
Sox9_E11_Sample1_peak_1159	chr1	74000062	74000654	+	74	NA	intron (ENSMUST00000191104.6, intron 6 of 32)	protein_coding-intron (ENSMUST00000169786.7, intron 6 of 34)	1209	ENSMUST00000190389.6	ENSMUSG00000055322	ENSMUST00000169786			Tns1			protein_coding
Sox9_E11_Sample1_peak_1160	chr1	74008639	74009475	+	76	NA	intron (ENSMUST00000187584.6, intron 4 of 32)	protein_coding-intron (ENSMUST00000169786.7, intron 4 of 34)	7365	ENSMUST00000186381.6	ENSMUSG00000055322	ENSMUST00000169786			Tns1			protein_coding
Sox9_E11_Sample1_peak_1161	chr1	74024687	74025323	+	93	NA	intron (ENSMUST00000191204.6, intron 3 of 7)	protein_coding-intron (ENSMUST00000191204.6, intron 3 of 7)	-8583	ENSMUST00000186381.6	ENSMUSG00000055322	ENSMUST00000169786			Tns1			protein_coding
Sox9_E11_Sample1_peak_1162	chr1	74036924	74037242	+	64	NA	promoter-TSS (ENSMUST00000187281.6)	protein_coding-promoter-TSS (ENSMUST00000187281.6)	50	ENSMUST00000187281.6	ENSMUSG00000055322	ENSMUST00000169786			Tns1			protein_coding
Sox9_E11_Sample1_peak_1163	chr1	74053771	74054694	+	119	NA	intron (ENSMUST00000191204.6, intron 3 of 7)	protein_coding-intron (ENSMUST00000169786.7, intron 3 of 34)	-17075	ENSMUST00000190599.1	ENSMUSG00000055322	ENSMUST00000169786			Tns1			protein_coding
Sox9_E11_Sample1_peak_1164	chr1	74067824	74069504	+	122	NA	intron (ENSMUST00000191204.6, intron 2 of 7)	protein_coding-intron (ENSMUST00000169786.7, intron 2 of 34)	22687	ENSMUST00000187584.6	ENSMUSG00000055322	ENSMUST00000169786			Tns1			protein_coding
Sox9_E11_Sample1_peak_1165	chr1	74098215	74099292	+	183	NA	intron (ENSMUST00000212888.1, intron 1 of 33)	protein_coding-intron (ENSMUST00000169786.7, intron 1 of 34)	-1885	ENSMUST00000188208.1	ENSMUSG00000055322	ENSMUST00000169786			Tns1			protein_coding
Sox9_E11_Sample1_peak_1166	chr1	74124215	74125353	+	100	NA	promoter-TSS (ENSMUST00000080167.10)	protein_coding-promoter-TSS (ENSMUST00000080167.10)	-335	ENSMUST00000191104.6	ENSMUSG00000055322	ENSMUST00000169786			Tns1			protein_coding
Sox9_E11_Sample1_peak_1167	chr1	74236106	74237322	+	181	NA	exon (ENSMUST00000006467.13, exon 1 of 10)	protein_coding-exon (ENSMUST00000006467.13, exon 1 of 10)	164	ENSMUST00000113819.1	ENSMUSG00000006304	ENSMUST00000185733			Arpc2			protein_coding
Sox9_E11_Sample1_peak_1168	chr1	74284256	74285455	+	340	NA	promoter-TSS (ENSMUST00000006462.13)	protein_coding-promoter-TSS (ENSMUST00000006462.13)	-75	ENSMUST00000113805.7	ENSMUSG00000026179	ENSMUST00000027370			Pnkd			protein_coding
Sox9_E11_Sample1_peak_1169	chr1	74295600	74296760	+	46	NA	promoter-TSS (ENSMUST00000152603.7)	protein_coding-promoter-TSS (ENSMUST00000152603.7)	-485	ENSMUST00000152603.7	ENSMUSG00000006301	ENSMUST00000135384			Tmbim1			protein_coding
Sox9_E11_Sample1_peak_1170	chr1	74303627	74304447	+	111	NA	promoter-TSS (ENSMUST00000141560.1)	protein_coding-promoter-TSS (ENSMUST00000141560.1)	83	ENSMUST00000141560.1	ENSMUSG00000006301	ENSMUST00000135384			Tmbim1			protein_coding
Sox9_E11_Sample1_peak_1171	chr1	74332122	74333124	+	258	NA	promoter-TSS (ENSMUST00000087225.5)	protein_coding-promoter-TSS (ENSMUST00000087225.5)	13	ENSMUST00000087225.5	ENSMUSG00000026179	ENSMUST00000027370			Pnkd			protein_coding
Sox9_E11_Sample1_peak_1172	chr1	74386760	74387271	+	141	NA	TTS (ENSMUST00000027368.5)	protein_coding-TTS (ENSMUST00000027368.5)	3415	ENSMUST00000134189.1	ENSMUSG00000026177	ENSMUST00000027368			Slc11a1			protein_coding
Sox9_E11_Sample1_peak_1173	chr1	74390711	74392544	+	174	NA	promoter-TSS (ENSMUST00000141175.1)	protein_coding-promoter-TSS (ENSMUST00000141175.1)	118	ENSMUST00000027367.13	ENSMUSG00000026176	ENSMUST00000152659			Ctdsp1			protein_coding
Sox9_E11_Sample1_peak_1174	chr1	74397082	74398301	+	215	NA	TTS (ENSMUST00000027367.13)	protein_coding-TTS (ENSMUST00000027367.13)	3381	ENSMUST00000083534.1	ENSMUSG00000065468	ENSMUST00000083534			Mir26b			miRNA
Sox9_E11_Sample1_peak_1175	chr1	74505417	74506708	+	284	NA	promoter-TSS (ENSMUST00000044260.10)	protein_coding-promoter-TSS (ENSMUST00000044260.10)	2	ENSMUST00000137100.1	ENSMUSG00000026174	ENSMUST00000137100			Cnot9			protein_coding
Sox9_E11_Sample1_peak_1176	chr1	74587565	74588552	+	387	NA	promoter-TSS (ENSMUST00000027315.13)	protein_coding-promoter-TSS (ENSMUST00000027315.13)	-30	ENSMUST00000113737.7	ENSMUSG00000026135	ENSMUST00000127921			Zfp142			protein_coding
Sox9_E11_Sample1_peak_1177	chr1	74601024	74601875	+	93	NA	promoter-TSS (ENSMUST00000027357.11)	protein_coding-promoter-TSS (ENSMUST00000027357.11)	4	ENSMUST00000087183.10	ENSMUSG00000033276	ENSMUST00000155473			Stk36			protein_coding
Sox9_E11_Sample1_peak_1178	chr1	74643679	74644097	+	60	NA	Intergenic	Intergenic	17423	ENSMUST00000123154.1	ENSMUSG00000033276	ENSMUST00000155473			Stk36			protein_coding
Sox9_E11_Sample1_peak_1179	chr1	74661470	74662472	+	234	NA	intron (ENSMUST00000129890.7, intron 1 of 4)	protein_coding-intron (ENSMUST00000042125.14, intron 1 of 19)	154	ENSMUST00000153636.7	ENSMUSG00000033257	ENSMUST00000129890			Ttll4			protein_coding
Sox9_E11_Sample1_peak_1180	chr1	74713134	74714172	+	145	NA	promoter-TSS (ENSMUST00000027356.6)	protein_coding-promoter-TSS (ENSMUST00000027356.6)	79	ENSMUST00000027356.6	ENSMUSG00000026170	ENSMUST00000189083			Cyp27a1			protein_coding
Sox9_E11_Sample1_peak_1181	chr1	74771288	74773367	+	113	NA	intron (ENSMUST00000006716.7, intron 1 of 3)	protein_coding-intron (ENSMUST00000006716.7, intron 1 of 3)	435	ENSMUST00000006716.7	ENSMUSG00000033227	ENSMUST00000189544			Wnt6			protein_coding
Sox9_E11_Sample1_peak_1182	chr1	74783616	74784641	+	129	NA	intron (ENSMUST00000189544.1, intron 1 of 1)	protein_coding-intron (ENSMUST00000006716.7, intron 3 of 3)	1689	ENSMUST00000189544.1	ENSMUSG00000033227	ENSMUST00000189544			Wnt6			protein_coding
Sox9_E11_Sample1_peak_1183	chr1	74803165	74803642	+	100	NA	TTS (ENSMUST00000187238.1)	protein_coding-TTS (ENSMUST00000187238.1)	10040	ENSMUST00000187238.1	ENSMUSG00000026167	ENSMUST00000006718			Wnt10a			protein_coding
Sox9_E11_Sample1_peak_1184	chr1	74808059	74808596	+	22	NA	Intergenic	Intergenic	14964	ENSMUST00000187238.1	ENSMUSG00000026167	ENSMUST00000006718			Wnt10a			protein_coding
Sox9_E11_Sample1_peak_1185	chr1	74816655	74817483	+	72	NA	Intergenic	Intergenic	23706	ENSMUST00000187238.1	ENSMUSG00000026167	ENSMUST00000006718			Wnt10a			protein_coding
Sox9_E11_Sample1_peak_1186	chr1	74854603	74855514	+	99	NA	exon (ENSMUST00000160379.3, exon 1 of 1)	protein_coding-exon (ENSMUST00000160379.3, exon 1 of 1)	124	ENSMUST00000160379.3	ENSMUSG00000090071	ENSMUST00000160379			Cdk5r2			protein_coding
Sox9_E11_Sample1_peak_1187	chr1	74884829	74885356	+	24	NA	promoter-TSS (ENSMUST00000162938.1)	protein_coding-promoter-TSS (ENSMUST00000162938.1)	230	ENSMUST00000159232.1	ENSMUSG00000055197	ENSMUST00000159232			Fev			protein_coding
Sox9_E11_Sample1_peak_1188	chr1	74900612	74901668	+	78	NA	promoter-TSS (ENSMUST00000083682.3)	miRNA-promoter-TSS (ENSMUST00000083682.3)	-419	ENSMUST00000083682.3	ENSMUSG00000065616	ENSMUST00000083682			Mir375			miRNA
Sox9_E11_Sample1_peak_1190	chr1	74948370	74950117	+	79	NA	intron (ENSMUST00000164097.3, intron 1 of 2)	protein_coding-intron (ENSMUST00000164097.3, intron 1 of 2)	2199	ENSMUST00000189364.1	ENSMUSG00000006538	ENSMUST00000164097			Ihh			protein_coding
Sox9_E11_Sample1_peak_1191	chr1	74964619	74965119	+	26	NA	Intergenic	Intergenic	10617	ENSMUST00000194616.1	ENSMUSG00000103145	ENSMUST00000194616			Gm37744			TEC
Sox9_E11_Sample1_peak_1192	chr1	75014041	75014458	+	47	NA	intron (ENSMUST00000152855.1, intron 2 of 4)	protein_coding-intron (ENSMUST00000152855.1, intron 2 of 4)	32390	ENSMUST00000152855.1	ENSMUSG00000026162	ENSMUST00000152855			Nhej1			protein_coding
Sox9_E11_Sample1_peak_1193	chr1	75016236	75017100	+	68	NA	intron (ENSMUST00000152855.1, intron 2 of 4)	protein_coding-intron (ENSMUST00000152855.1, intron 2 of 4)	29971	ENSMUST00000152855.1	ENSMUSG00000026162	ENSMUST00000152855			Nhej1			protein_coding
Sox9_E11_Sample1_peak_1194	chr1	75124612	75125480	+	262	NA	TTS (ENSMUST00000027405.5)	protein_coding-TTS (ENSMUST00000027405.5)	154	ENSMUST00000188033.1	ENSMUSG00000026162	ENSMUST00000152855			Nhej1			protein_coding
Sox9_E11_Sample1_peak_1195	chr1	75141413	75143271	+	194	NA	promoter-TSS (ENSMUST00000097694.10)	protein_coding-promoter-TSS (ENSMUST00000097694.10)	296	ENSMUST00000168720.7	ENSMUSG00000033159	ENSMUST00000187888			Cnppd1			protein_coding
Sox9_E11_Sample1_peak_1196	chr1	75168329	75169310	+	478	NA	promoter-TSS (ENSMUST00000160282.1)	protein_coding-promoter-TSS (ENSMUST00000160282.1)	41	ENSMUST00000160282.1	ENSMUSG00000026197	ENSMUST00000161106			Zfand2b			protein_coding
Sox9_E11_Sample1_peak_1197	chr1	75179744	75180472	+	217	NA	TTS (ENSMUST00000040689.14)	protein_coding-TTS (ENSMUST00000040689.14)	178	ENSMUST00000159219.7	ENSMUSG00000026198	ENSMUST00000161215			Abcb6			protein_coding
Sox9_E11_Sample1_peak_1198	chr1	75191494	75192641	+	246	NA	promoter-TSS (ENSMUST00000040689.14)	protein_coding-promoter-TSS (ENSMUST00000040689.14)	-84	ENSMUST00000151887.8	ENSMUSG00000026199	ENSMUST00000152233			Ankzf1			protein_coding
Sox9_E11_Sample1_peak_1199	chr1	75210575	75211260	+	42	NA	promoter-TSS (ENSMUST00000027401.10)	protein_coding-promoter-TSS (ENSMUST00000027401.10)	37	ENSMUST00000142052.7	ENSMUSG00000026201	ENSMUST00000189242			Stk16			protein_coding
Sox9_E11_Sample1_peak_1200	chr1	75218407	75219875	+	266	NA	promoter-TSS (ENSMUST00000079464.12)	protein_coding-promoter-TSS (ENSMUST00000079464.12)	102	ENSMUST00000187103.1	ENSMUSG00000026202	ENSMUST00000186971			Tuba4a			protein_coding
Sox9_E11_Sample1_peak_1201	chr1	75236128	75236980	+	308	NA	promoter-TSS (ENSMUST00000055223.13)	protein_coding-promoter-TSS (ENSMUST00000055223.13)	-2	ENSMUST00000187058.6	ENSMUSG00000026203	ENSMUST00000187058			Dnajb2			protein_coding
Sox9_E11_Sample1_peak_1202	chr1	75316752	75318082	+	427	NA	promoter-TSS (ENSMUST00000113605.9)	protein_coding-promoter-TSS (ENSMUST00000113605.9)	-8	ENSMUST00000187791.1	ENSMUSG00000026209	ENSMUST00000113605			Dnpep			protein_coding
Sox9_E11_Sample1_peak_1203	chr1	75337383	75338613	+	85	NA	Intergenic	Intergenic	-20008	ENSMUST00000188652.6	ENSMUSG00000026209	ENSMUST00000113605			Dnpep			protein_coding
Sox9_E11_Sample1_peak_1204	chr1	75360233	75361067	+	139	NA	promoter-TSS (ENSMUST00000144894.1)	protein_coding-promoter-TSS (ENSMUST00000144894.1)	321	ENSMUST00000027409.9	ENSMUSG00000026208	ENSMUST00000144894			Des			protein_coding
Sox9_E11_Sample1_peak_1206	chr1	75381734	75382886	+	88	NA	intron (ENSMUST00000187214.1, intron 1 of 1)	protein_coding-intron (ENSMUST00000087122.11, intron 1 of 40)	172	ENSMUST00000125306.1	ENSMUSG00000026207	ENSMUST00000132222			Speg			protein_coding
Sox9_E11_Sample1_peak_1207	chr1	75388319	75388670	+	66	NA	TTS (ENSMUST00000125118.1)	protein_coding-TTS (ENSMUST00000125118.1)	2884	ENSMUST00000137868.7	ENSMUSG00000026207	ENSMUST00000132222			Speg			protein_coding
Sox9_E11_Sample1_peak_1208	chr1	75398778	75400566	+	200	NA	promoter-TSS (ENSMUST00000113587.7)	protein_coding-promoter-TSS (ENSMUST00000113587.7)	-413	ENSMUST00000113589.7	ENSMUSG00000026207	ENSMUST00000132222			Speg			protein_coding
Sox9_E11_Sample1_peak_1209	chr1	75422736	75423542	+	102	NA	promoter-TSS (ENSMUST00000143679.1)	protein_coding-promoter-TSS (ENSMUST00000143679.1)	-371	ENSMUST00000143679.1	ENSMUSG00000026207	ENSMUST00000132222			Speg			protein_coding
Sox9_E11_Sample1_peak_1210	chr1	75435652	75436504	+	205	NA	promoter-TSS (ENSMUST00000131545.7)	protein_coding-promoter-TSS (ENSMUST00000131545.7)	-9	ENSMUST00000131545.7	ENSMUSG00000033021	ENSMUST00000145166			Gmppa			protein_coding
Sox9_E11_Sample1_peak_1211	chr1	75450100	75451017	+	46	NA	promoter-TSS (ENSMUST00000037708.9)	protein_coding-promoter-TSS (ENSMUST00000037708.9)	122	ENSMUST00000113577.7	ENSMUSG00000033007	ENSMUST00000037708			Asic4			protein_coding
Sox9_E11_Sample1_peak_1212	chr1	75458503	75459109	+	42	NA	intron (ENSMUST00000113577.7, intron 1 of 8)	protein_coding-intron (ENSMUST00000037708.9, intron 1 of 9)	8107	ENSMUST00000037708.9	ENSMUSG00000033007	ENSMUST00000037708			Asic4			protein_coding
Sox9_E11_Sample1_peak_1213	chr1	75461278	75462146	+	114	NA	intron (ENSMUST00000113577.7, intron 1 of 8)	protein_coding-intron (ENSMUST00000037708.9, intron 1 of 9)	9049	ENSMUST00000194916.1	ENSMUSG00000102605	ENSMUST00000194916			Gm37264			TEC
Sox9_E11_Sample1_peak_1215	chr1	75478814	75479845	+	296	NA	promoter-TSS (ENSMUST00000050899.6)	protein_coding-promoter-TSS (ENSMUST00000050899.6)	-22	ENSMUST00000094818.3	ENSMUSG00000032997	ENSMUST00000124042			Chpf			protein_coding
Sox9_E11_Sample1_peak_1216	chr1	75486808	75487903	+	143	NA	promoter-TSS (ENSMUST00000156499.1)	protein_coding-promoter-TSS (ENSMUST00000156499.1)	-122	ENSMUST00000156499.1	ENSMUSG00000026211	ENSMUST00000113565			Obsl1			protein_coding
Sox9_E11_Sample1_peak_1217	chr1	75495147	75495665	+	64	NA	TTS (ENSMUST00000113565.2)	protein_coding-TTS (ENSMUST00000113565.2)	-2339	ENSMUST00000132252.1	ENSMUSG00000026211	ENSMUST00000113565			Obsl1			protein_coding
Sox9_E11_Sample1_peak_1218	chr1	75505223	75506859	+	256	NA	promoter-TSS (ENSMUST00000155084.7)	protein_coding-promoter-TSS (ENSMUST00000155084.7)	320	ENSMUST00000113567.8	ENSMUSG00000026211	ENSMUST00000113565			Obsl1			protein_coding
Sox9_E11_Sample1_peak_1219	chr1	75521427	75522003	+	349	NA	promoter-TSS (ENSMUST00000129652.1)	protein_coding-promoter-TSS (ENSMUST00000129652.1)	-76	ENSMUST00000140963.7	ENSMUSG00000026213	ENSMUST00000129794			Stk11ip			protein_coding
Sox9_E11_Sample1_peak_1220	chr1	75546172	75547063	+	160	NA	promoter-TSS (ENSMUST00000132612.7)	protein_coding-promoter-TSS (ENSMUST00000132612.7)	-27	ENSMUST00000132612.7	ENSMUSG00000006576	ENSMUST00000154101			Slc4a3			protein_coding
Sox9_E11_Sample1_peak_1221	chr1	75559269	75559824	+	76	NA	TTS (ENSMUST00000027415.11)	protein_coding-TTS (ENSMUST00000027415.11)	7837	ENSMUST00000132110.1	ENSMUSG00000006576	ENSMUST00000154101			Slc4a3			protein_coding
Sox9_E11_Sample1_peak_1223	chr1	75662573	75663026	+	26	NA	Intergenic	Intergenic	26409	ENSMUST00000121823.1	ENSMUSG00000082012	ENSMUST00000121823			Gm5257			processed_pseudogene
Sox9_E11_Sample1_peak_1225	chr1	75733195	75733857	+	176	NA	Intergenic	Intergenic	97136	ENSMUST00000121823.1	ENSMUSG00000082012	ENSMUST00000121823			Gm5257			processed_pseudogene
Sox9_E11_Sample1_peak_1227	chr1	75925696	75926157	+	32	NA	Intergenic	Intergenic	92830	ENSMUST00000188786.1	ENSMUSG00000099996	ENSMUST00000188786			Gm29065			lncRNA
Sox9_E11_Sample1_peak_1228	chr1	75936794	75937482	+	85	NA	Intergenic	Intergenic	81618	ENSMUST00000188786.1	ENSMUSG00000099996	ENSMUST00000188786			Gm29065			lncRNA
Sox9_E11_Sample1_peak_1229	chr1	76018734	76019609	+	118	NA	promoter-TSS (ENSMUST00000188786.1)	lncRNA-promoter-TSS (ENSMUST00000188786.1)	-415	ENSMUST00000188786.1	ENSMUSG00000099996	ENSMUST00000188786			Gm29065			lncRNA
Sox9_E11_Sample1_peak_1230	chr1	76024792	76025527	+	110	NA	Intergenic	Intergenic	-6403	ENSMUST00000188786.1	ENSMUSG00000099996	ENSMUST00000188786			Gm29065			lncRNA
Sox9_E11_Sample1_peak_1231	chr1	76030410	76031282	+	76	NA	Intergenic	Intergenic	-12090	ENSMUST00000188786.1	ENSMUSG00000099996	ENSMUST00000188786			Gm29065			lncRNA
Sox9_E11_Sample1_peak_1232	chr1	76942521	76943492	+	192	NA	intron (ENSMUST00000191156.1, intron 1 of 1)	lncRNA-intron (ENSMUST00000191156.1, intron 1 of 1)	84786	ENSMUST00000191156.1	ENSMUSG00000100534	ENSMUST00000191156			Gm816			lncRNA
Sox9_E11_Sample1_peak_1233	chr1	77050963	77051772	+	85	NA	Intergenic	Intergenic	-23575	ENSMUST00000191156.1	ENSMUSG00000100534	ENSMUST00000191156			Gm816			lncRNA
Sox9_E11_Sample1_peak_1234	chr1	77080892	77081772	+	120	NA	Intergenic	Intergenic	-53540	ENSMUST00000191156.1	ENSMUSG00000100534	ENSMUST00000191156			Gm816			lncRNA
Sox9_E11_Sample1_peak_1235	chr1	77174666	77175616	+	76	NA	Intergenic	Intergenic	-28149	ENSMUST00000193479.1	ENSMUSG00000102904	ENSMUST00000193479			Gm38265			TEC
Sox9_E11_Sample1_peak_1236	chr1	77184210	77184963	+	39	NA	Intergenic	Intergenic	-37594	ENSMUST00000193479.1	ENSMUSG00000102904	ENSMUST00000193479			Gm38265			TEC
Sox9_E11_Sample1_peak_1237	chr1	77213356	77214345	+	158	NA	Intergenic	Intergenic	-66858	ENSMUST00000193479.1	ENSMUSG00000102904	ENSMUST00000193479			Gm38265			TEC
Sox9_E11_Sample1_peak_1239	chr1	77258614	77259346	+	134	NA	Intergenic	Intergenic	-111988	ENSMUST00000193479.1	ENSMUSG00000102904	ENSMUST00000193479			Gm38265			TEC
Sox9_E11_Sample1_peak_1241	chr1	77468722	77469356	+	74	NA	intron (ENSMUST00000027451.12, intron 3 of 17)	protein_coding-intron (ENSMUST00000027451.12, intron 3 of 17)	27729	ENSMUST00000184495.1	ENSMUSG00000099141	ENSMUST00000184495			Mir6352			miRNA
Sox9_E11_Sample1_peak_1242	chr1	77473685	77473919	+	32	NA	intron (ENSMUST00000027451.12, intron 3 of 17)	protein_coding-intron (ENSMUST00000027451.12, intron 3 of 17)	22966	ENSMUST00000184495.1	ENSMUSG00000099141	ENSMUST00000184495			Mir6352			miRNA
Sox9_E11_Sample1_peak_1244	chr1	77514576	77516758	+	150	NA	promoter-TSS (ENSMUST00000027451.12)	protein_coding-promoter-TSS (ENSMUST00000027451.12)	387	ENSMUST00000189147.1	ENSMUSG00000101849	ENSMUST00000189147			Gm28386			lncRNA
Sox9_E11_Sample1_peak_1245	chr1	77926132	77927308	+	68	NA	Intergenic	Intergenic	-28274	ENSMUST00000083281.1	ENSMUSG00000065215	ENSMUST00000083281			Gm26263			snRNA
Sox9_E11_Sample1_peak_1246	chr1	77981429	77982236	+	90	NA	Intergenic	Intergenic	-9456	ENSMUST00000189245.1	ENSMUSG00000102052	ENSMUST00000189245			Gm28387			lncRNA
Sox9_E11_Sample1_peak_1247	chr1	78008977	78009368	+	85	NA	Intergenic	Intergenic	-36796	ENSMUST00000189245.1	ENSMUSG00000102052	ENSMUST00000189245			Gm28387			lncRNA
Sox9_E11_Sample1_peak_1248	chr1	78140516	78141326	+	176	NA	intron (ENSMUST00000004994.15, intron 4 of 8)	protein_coding-intron (ENSMUST00000004994.15, intron 4 of 8)	55917	ENSMUST00000004994.15	ENSMUSG00000004872	ENSMUST00000172555			Pax3			protein_coding
Sox9_E11_Sample1_peak_1249	chr1	78157462	78158315	+	39	NA	intron (ENSMUST00000004994.15, intron 4 of 8)	protein_coding-intron (ENSMUST00000004994.15, intron 4 of 8)	38950	ENSMUST00000004994.15	ENSMUSG00000004872	ENSMUST00000172555			Pax3			protein_coding
Sox9_E11_Sample1_peak_1250	chr1	78203164	78203656	+	30	NA	Intergenic	Intergenic	-6276	ENSMUST00000087086.6	ENSMUSG00000004872	ENSMUST00000172555			Pax3			protein_coding
Sox9_E11_Sample1_peak_1251	chr1	78216066	78217608	+	70	NA	exon (ENSMUST00000238744.1, exon 1 of 1)	processed_pseudogene-exon (ENSMUST00000238744.1, exon 1 of 1)	639	ENSMUST00000238744.1	ENSMUSG00000118426	ENSMUST00000238744			Gm2102			processed_pseudogene
Sox9_E11_Sample1_peak_1252	chr1	78309746	78311236	+	182	NA	exon (ENSMUST00000036172.9, exon 1 of 5)	protein_coding-exon (ENSMUST00000036172.9, exon 1 of 5)	146	ENSMUST00000036172.9	ENSMUSG00000032908	ENSMUST00000036172			Sgpp2			protein_coding
Sox9_E11_Sample1_peak_1254	chr1	78364130	78364653	+	25	NA	intron (ENSMUST00000036172.9, intron 2 of 4)	protein_coding-intron (ENSMUST00000036172.9, intron 2 of 4)	-11223	ENSMUST00000191857.1	ENSMUSG00000102945	ENSMUST00000191857			Gm37884			TEC
Sox9_E11_Sample1_peak_1257	chr1	78488481	78489621	+	270	NA	promoter-TSS (ENSMUST00000068333.13)	protein_coding-promoter-TSS (ENSMUST00000068333.13)	-154	ENSMUST00000068333.13	ENSMUSG00000026245	ENSMUST00000170217			Farsb			protein_coding
Sox9_E11_Sample1_peak_1258	chr1	78511280	78512275	+	61	NA	promoter-TSS (ENSMUST00000012331.6)	protein_coding-promoter-TSS (ENSMUST00000012331.6)	-35	ENSMUST00000152111.1	ENSMUSG00000012187	ENSMUST00000149732			Mogat1			protein_coding
Sox9_E11_Sample1_peak_1259	chr1	78536936	78537798	+	78	NA	promoter-TSS (ENSMUST00000125458.1)	protein_coding-promoter-TSS (ENSMUST00000125458.1)	-261	ENSMUST00000125458.1	ENSMUSG00000012187	ENSMUST00000149732			Mogat1			protein_coding
Sox9_E11_Sample1_peak_1260	chr1	78615796	78616217	+	53	NA	intron (ENSMUST00000186132.1, intron 1 of 1)	lncRNA-intron (ENSMUST00000186132.1, intron 1 of 1)	539	ENSMUST00000186132.1	ENSMUSG00000100562	ENSMUST00000186132			Gm29611			lncRNA
Sox9_E11_Sample1_peak_1262	chr1	78647122	78647697	+	51	NA	Intergenic	Intergenic	-10416	ENSMUST00000035779.14	ENSMUSG00000032883	ENSMUST00000134566			Acsl3			protein_coding
Sox9_E11_Sample1_peak_1263	chr1	78648964	78649799	+	89	NA	Intergenic	Intergenic	-8444	ENSMUST00000035779.14	ENSMUSG00000032883	ENSMUST00000134566			Acsl3			protein_coding
Sox9_E11_Sample1_peak_1264	chr1	78656700	78658909	+	341	NA	promoter-TSS (ENSMUST00000035779.14)	protein_coding-promoter-TSS (ENSMUST00000035779.14)	-21	ENSMUST00000035779.14	ENSMUSG00000032883	ENSMUST00000134566			Acsl3			protein_coding
Sox9_E11_Sample1_peak_1266	chr1	78745273	78745610	+	37	NA	Intergenic	Intergenic	39418	ENSMUST00000191249.1	ENSMUSG00000099377	ENSMUST00000191249			Gm6159			processed_pseudogene
Sox9_E11_Sample1_peak_1267	chr1	79439798	79440520	+	93	NA	promoter-TSS (ENSMUST00000049972.5)	protein_coding-promoter-TSS (ENSMUST00000049972.5)	-39	ENSMUST00000049972.5	ENSMUSG00000050711	ENSMUST00000049972			Scg2			protein_coding
Sox9_E11_Sample1_peak_1268	chr1	79580958	79581778	+	142	NA	Intergenic	Intergenic	39666	ENSMUST00000195349.1	ENSMUSG00000102235	ENSMUST00000195349			Gm37886			TEC
Sox9_E11_Sample1_peak_1270	chr1	79671111	79672737	+	359	NA	promoter-TSS (ENSMUST00000159312.1)	protein_coding-promoter-TSS (ENSMUST00000159312.1)	41	ENSMUST00000159312.1	ENSMUSG00000054702	ENSMUST00000160706			Ap1s3			protein_coding
Sox9_E11_Sample1_peak_1271	chr1	79678023	79679147	+	255	NA	Intergenic	Intergenic	-6613	ENSMUST00000162342.7	ENSMUSG00000054702	ENSMUST00000160706			Ap1s3			protein_coding
Sox9_E11_Sample1_peak_1272	chr1	79696947	79698257	+	190	NA	Intergenic	Intergenic	25054	ENSMUST00000127771.7	ENSMUSG00000073643	ENSMUST00000048820			Wdfy1			protein_coding
Sox9_E11_Sample1_peak_1273	chr1	79745930	79746653	+	76	NA	intron (ENSMUST00000113512.7, intron 1 of 11)	protein_coding-intron (ENSMUST00000048820.13, intron 1 of 4)	15430	ENSMUST00000186464.1	ENSMUSG00000073643	ENSMUST00000048820			Wdfy1			protein_coding
Sox9_E11_Sample1_peak_1274	chr1	79760868	79762156	+	258	NA	intron (ENSMUST00000113512.7, intron 1 of 11)	protein_coding-intron (ENSMUST00000048820.13, intron 1 of 4)	209	ENSMUST00000186464.1	ENSMUSG00000073643	ENSMUST00000048820			Wdfy1			protein_coding
Sox9_E11_Sample1_peak_1275	chr1	79775625	79776536	+	229	NA	promoter-TSS (ENSMUST00000027464.8)	protein_coding-promoter-TSS (ENSMUST00000027464.8)	-36	ENSMUST00000189176.1	ENSMUSG00000026248	ENSMUST00000189176			Mrpl44			protein_coding
Sox9_E11_Sample1_peak_1276	chr1	79848229	79848807	+	66	NA	intron (ENSMUST00000190724.1, intron 1 of 4)	protein_coding-intron (ENSMUST00000027467.10, intron 1 of 8)	10117	ENSMUST00000191026.1	ENSMUSG00000026249	ENSMUST00000191529			Serpine2			protein_coding
Sox9_E11_Sample1_peak_1277	chr1	79857998	79859187	+	194	NA	promoter-TSS (ENSMUST00000191026.1)	protein_coding-promoter-TSS (ENSMUST00000191026.1)	43	ENSMUST00000191026.1	ENSMUSG00000026249	ENSMUST00000191529			Serpine2			protein_coding
Sox9_E11_Sample1_peak_1278	chr1	79931942	79933083	+	170	NA	Intergenic	Intergenic	-9086	ENSMUST00000165691.2	ENSMUSG00000067106	ENSMUST00000165691			Gm5529			processed_pseudogene
Sox9_E11_Sample1_peak_1279	chr1	80180823	80181240	+	76	NA	Intergenic	Intergenic	-3688	ENSMUST00000191325.1	ENSMUSG00000099552	ENSMUST00000185548			9830004L10Rik			lncRNA
Sox9_E11_Sample1_peak_1281	chr1	80339838	80341331	+	436	NA	promoter-TSS (ENSMUST00000163119.7)	protein_coding-promoter-TSS (ENSMUST00000163119.7)	-104	ENSMUST00000163119.7	ENSMUSG00000004364	ENSMUST00000163119			Cul3			protein_coding
Sox9_E11_Sample1_peak_1282	chr1	80757642	80758922	+	247	NA	intron (ENSMUST00000191505.1, intron 1 of 13)	protein_coding-intron (ENSMUST00000077946.11, intron 1 of 55)	166	ENSMUST00000077946.11	ENSMUSG00000038608	ENSMUST00000191449			Dock10			protein_coding
Sox9_E11_Sample1_peak_1284	chr1	81520760	81521359	+	84	NA	exon (ENSMUST00000192484.1, exon 1 of 1)	TEC-exon (ENSMUST00000192484.1, exon 1 of 1)	1282	ENSMUST00000192484.1	ENSMUSG00000104029	ENSMUST00000192484			Gm37210			TEC
Sox9_E11_Sample1_peak_1285	chr1	81593344	81594925	+	208	NA	Intergenic	Intergenic	-36651	ENSMUST00000191337.1	ENSMUSG00000101986	ENSMUST00000191337			Gm6198			processed_pseudogene
Sox9_E11_Sample1_peak_1286	chr1	81718018	81718840	+	176	NA	Intergenic	Intergenic	24540	ENSMUST00000117185.1	ENSMUSG00000087008	ENSMUST00000117185			Gm5530			processed_pseudogene
Sox9_E11_Sample1_peak_1287	chr1	81744414	81745250	+	115	NA	Intergenic	Intergenic	-1863	ENSMUST00000117185.1	ENSMUSG00000087008	ENSMUST00000117185			Gm5530			processed_pseudogene
Sox9_E11_Sample1_peak_1288	chr1	81754013	81755793	+	126	NA	Intergenic	Intergenic	-11934	ENSMUST00000117185.1	ENSMUSG00000087008	ENSMUST00000117185			Gm5530			processed_pseudogene
Sox9_E11_Sample1_peak_1290	chr1	82070096	82071088	+	217	NA	Intergenic	Intergenic	-34588	ENSMUST00000195065.1	ENSMUSG00000103571	ENSMUST00000195065			Gm37114			TEC
Sox9_E11_Sample1_peak_1291	chr1	82124501	82124980	+	111	NA	Intergenic	Intergenic	-7176	ENSMUST00000183462.1	ENSMUSG00000098797	ENSMUST00000183462			Mir6344			miRNA
Sox9_E11_Sample1_peak_1292	chr1	82220804	82221932	+	99	NA	Intergenic	Intergenic	-11744	ENSMUST00000023262.5	ENSMUSG00000022591	ENSMUST00000023262			Gm9747			protein_coding
Sox9_E11_Sample1_peak_1293	chr1	82274290	82274597	+	63	NA	intron (ENSMUST00000069799.2, intron 1 of 1)	protein_coding-intron (ENSMUST00000069799.2, intron 1 of 1)	16973	ENSMUST00000069799.2	ENSMUSG00000055980	ENSMUST00000069799			Irs1			protein_coding
Sox9_E11_Sample1_peak_1294	chr1	82283085	82284027	+	133	NA	intron (ENSMUST00000069799.2, intron 1 of 1)	protein_coding-intron (ENSMUST00000069799.2, intron 1 of 1)	7860	ENSMUST00000069799.2	ENSMUSG00000055980	ENSMUST00000069799			Irs1			protein_coding
Sox9_E11_Sample1_peak_1295	chr1	82290352	82292944	+	431	NA	promoter-TSS (ENSMUST00000069799.2)	protein_coding-promoter-TSS (ENSMUST00000069799.2)	-232	ENSMUST00000069799.2	ENSMUSG00000055980	ENSMUST00000069799			Irs1			protein_coding
Sox9_E11_Sample1_peak_1296	chr1	82316262	82317038	+	461	NA	promoter-TSS (ENSMUST00000187475.1)	protein_coding-promoter-TSS (ENSMUST00000187475.1)	8	ENSMUST00000187475.1	ENSMUSG00000026142	ENSMUST00000187475			Rhbdd1			protein_coding
Sox9_E11_Sample1_peak_1299	chr1	82476437	82477445	+	102	NA	intron (ENSMUST00000087050.6, intron 37 of 47)	protein_coding-intron (ENSMUST00000087050.6, intron 37 of 47)	-74195	ENSMUST00000187929.1	ENSMUSG00000100786	ENSMUST00000187929			Gm28940			lncRNA
Sox9_E11_Sample1_peak_1300	chr1	82554563	82555281	+	106	NA	intron (ENSMUST00000135271.1, intron 4 of 6)	protein_coding-intron (ENSMUST00000087050.6, intron 4 of 47)	31870	ENSMUST00000135271.1	ENSMUSG00000067158	ENSMUST00000135271			Col4a4			protein_coding
Sox9_E11_Sample1_peak_1301	chr1	82577448	82578626	+	196	NA	intron (ENSMUST00000087050.6, intron 1 of 47)	protein_coding-intron (ENSMUST00000087050.6, intron 1 of 47)	8755	ENSMUST00000135271.1	ENSMUSG00000067158	ENSMUST00000135271			Col4a4			protein_coding
Sox9_E11_Sample1_peak_1302	chr1	82586576	82587458	+	170	NA	promoter-TSS (ENSMUST00000087050.6)	protein_coding-promoter-TSS (ENSMUST00000087050.6)	41	ENSMUST00000113457.8	ENSMUSG00000079465	ENSMUST00000125563			Col4a3			protein_coding
Sox9_E11_Sample1_peak_1303	chr1	82603381	82603970	+	93	NA	intron (ENSMUST00000141994.1, intron 1 of 1)	protein_coding-intron (ENSMUST00000113457.8, intron 1 of 51)	16699	ENSMUST00000113457.8	ENSMUSG00000079465	ENSMUST00000125563			Col4a3			protein_coding
Sox9_E11_Sample1_peak_1305	chr1	82682456	82682846	+	102	NA	intron (ENSMUST00000113457.8, intron 33 of 51)	protein_coding-intron (ENSMUST00000113457.8, intron 33 of 51)	-32653	ENSMUST00000125563.7	ENSMUSG00000079465	ENSMUST00000125563			Col4a3			protein_coding
Sox9_E11_Sample1_peak_1306	chr1	82717655	82718325	+	85	NA	exon (ENSMUST00000113457.8, exon 51 of 52)	protein_coding-exon (ENSMUST00000113457.8, exon 51 of 52)	2686	ENSMUST00000152664.1	ENSMUSG00000079465	ENSMUST00000125563			Col4a3			protein_coding
Sox9_E11_Sample1_peak_1307	chr1	82724771	82725783	+	454	NA	promoter-TSS (ENSMUST00000181720.1)	lncRNA-promoter-TSS (ENSMUST00000181720.1)	-108	ENSMUST00000186858.1	ENSMUSG00000097564	ENSMUST00000187869			C430014B12Rik			lncRNA
Sox9_E11_Sample1_peak_1308	chr1	82766454	82767099	+	46	NA	intron (ENSMUST00000138787.1, intron 1 of 2)	protein_coding-intron (ENSMUST00000027331.2, intron 1 of 3)	1685	ENSMUST00000027331.2	ENSMUSG00000026149	ENSMUST00000027331			Tm4sf20			protein_coding
Sox9_E11_Sample1_peak_1309	chr1	82787284	82787722	+	48	NA	Intergenic	Intergenic	-10293	ENSMUST00000186121.1	ENSMUSG00000099771	ENSMUST00000186121			Gm19257			processed_pseudogene
Sox9_E11_Sample1_peak_1310	chr1	82815153	82816159	+	93	NA	Intergenic	Intergenic	-4179	ENSMUST00000186334.1	ENSMUSG00000100170	ENSMUST00000186334			Gm28942			lncRNA
Sox9_E11_Sample1_peak_1311	chr1	82839247	82840318	+	384	NA	promoter-TSS (ENSMUST00000186043.1)	protein_coding-promoter-TSS (ENSMUST00000186043.1)	48	ENSMUST00000190046.6	ENSMUSG00000026159	ENSMUST00000186302			Agfg1			protein_coding
Sox9_E11_Sample1_peak_1313	chr1	83037819	83038828	+	105	NA	intron (ENSMUST00000045560.14, intron 1 of 6)	protein_coding-intron (ENSMUST00000045560.14, intron 1 of 6)	108	ENSMUST00000164473.1	ENSMUSG00000038496	ENSMUST00000142805			Slc19a3			protein_coding
Sox9_E11_Sample1_peak_1314	chr1	83075902	83076299	+	20	NA	Intergenic	Intergenic	8998	ENSMUST00000190858.1	ENSMUSG00000099691	ENSMUST00000190858			Gm29518			processed_pseudogene
Sox9_E11_Sample1_peak_1315	chr1	83084820	83085149	+	68	NA	Intergenic	Intergenic	17882	ENSMUST00000190858.1	ENSMUSG00000099691	ENSMUST00000190858			Gm29518			processed_pseudogene
Sox9_E11_Sample1_peak_1317	chr1	83135521	83136473	+	108	NA	Intergenic	Intergenic	19204	ENSMUST00000186832.1	ENSMUSG00000026166	ENSMUST00000027351			Ccl20			protein_coding
Sox9_E11_Sample1_peak_1318	chr1	83159307	83160200	+	277	NA	promoter-TSS (ENSMUST00000065403.6)	protein_coding-promoter-TSS (ENSMUST00000065403.6)	1	ENSMUST00000133079.1	ENSMUSG00000053161	ENSMUST00000133079			Daw1			protein_coding
Sox9_E11_Sample1_peak_1321	chr1	83345793	83346840	+	130	NA	intron (ENSMUST00000160237.1, intron 2 of 2)	protein_coding-intron (ENSMUST00000053075.14, intron 3 of 9)	-13730	ENSMUST00000194004.1	ENSMUSG00000104374	ENSMUST00000194004			Gm37517			TEC
Sox9_E11_Sample1_peak_1322	chr1	83407280	83408625	+	248	NA	intron (ENSMUST00000160567.1, intron 1 of 1)	protein_coding-intron (ENSMUST00000053075.14, intron 1 of 9)	187	ENSMUST00000160237.1	ENSMUSG00000026163	ENSMUST00000159078			Sphkap			protein_coding
Sox9_E11_Sample1_peak_1323	chr1	83712930	83713622	+	111	NA	intron (ENSMUST00000189405.6, intron 3 of 4)	lncRNA-intron (ENSMUST00000189405.6, intron 3 of 4)	-82636	ENSMUST00000178653.1	ENSMUSG00000094946	ENSMUST00000178653			Gm25754			miRNA
Sox9_E11_Sample1_peak_1324	chr1	83722644	83723106	+	32	NA	intron (ENSMUST00000189405.6, intron 3 of 4)	lncRNA-intron (ENSMUST00000189405.6, intron 3 of 4)	-73037	ENSMUST00000178653.1	ENSMUSG00000094946	ENSMUST00000178653			Gm25754			miRNA
Sox9_E11_Sample1_peak_1326	chr1	84283793	84285049	+	161	NA	promoter-TSS (ENSMUST00000176720.1)	protein_coding-promoter-TSS (ENSMUST00000176720.1)	2	ENSMUST00000176720.1	ENSMUSG00000045658	ENSMUST00000175996			Pid1			protein_coding
Sox9_E11_Sample1_peak_1328	chr1	84387485	84388178	+	51	NA	intron (ENSMUST00000049126.12, intron 11 of 12)	protein_coding-intron (ENSMUST00000049126.12, intron 11 of 12)	7568	ENSMUST00000191700.1	ENSMUSG00000104396	ENSMUST00000191700			Gm37959			TEC
Sox9_E11_Sample1_peak_1329	chr1	84395478	84396472	+	176	NA	promoter-TSS (ENSMUST00000191700.1)	TEC-promoter-TSS (ENSMUST00000191700.1)	-576	ENSMUST00000191700.1	ENSMUSG00000104396	ENSMUST00000191700			Gm37959			TEC
Sox9_E11_Sample1_peak_1330	chr1	84404859	84405588	+	59	NA	intron (ENSMUST00000049126.12, intron 10 of 12)	protein_coding-intron (ENSMUST00000049126.12, intron 10 of 12)	-9824	ENSMUST00000191700.1	ENSMUSG00000104396	ENSMUST00000191700			Gm37959			TEC
Sox9_E11_Sample1_peak_1331	chr1	84695248	84696612	+	345	NA	promoter-TSS (ENSMUST00000175513.1)	miRNA-promoter-TSS (ENSMUST00000175513.1)	89	ENSMUST00000191306.1	ENSMUSG00000036766	ENSMUST00000185606			Dner			protein_coding
Sox9_E11_Sample1_peak_1332	chr1	84838270	84840503	+	327	NA	promoter-TSS (ENSMUST00000027421.12)	protein_coding-promoter-TSS (ENSMUST00000027421.12)	-75	ENSMUST00000185909.6	ENSMUSG00000026219	ENSMUST00000185672			Trip12			protein_coding
Sox9_E11_Sample1_peak_1333	chr1	84851379	84852067	+	53	NA	intron (ENSMUST00000143656.7, intron 2 of 4)	protein_coding-intron (ENSMUST00000097672.3, intron 1 of 3)	-11207	ENSMUST00000186465.6	ENSMUSG00000026219	ENSMUST00000185672			Trip12			protein_coding
Sox9_E11_Sample1_peak_1334	chr1	84933682	84935282	+	202	NA	intron (ENSMUST00000027422.6, intron 1 of 4)	protein_coding-intron (ENSMUST00000027422.6, intron 1 of 4)	375	ENSMUST00000186980.1	ENSMUSG00000026220	ENSMUST00000027422			Slc16a14			protein_coding
Sox9_E11_Sample1_peak_1335	chr1	85581724	85582217	+	106	NA	intron (ENSMUST00000131950.7, intron 9 of 10)	protein_coding-intron (ENSMUST00000093508.6, intron 9 of 11)	2308	ENSMUST00000186740.1	ENSMUSG00000070034	ENSMUST00000151690			Sp110			protein_coding
Sox9_E11_Sample1_peak_1336	chr1	85649715	85650685	+	43	NA	intron (ENSMUST00000147552.7, intron 1 of 15)	protein_coding-intron (ENSMUST00000054279.14, intron 1 of 11)	150	ENSMUST00000066427.10	ENSMUSG00000026222	ENSMUST00000066427			Sp100			protein_coding
Sox9_E11_Sample1_peak_1337	chr1	85703204	85704008	+	307	NA	intron (ENSMUST00000141709.1, intron 1 of 4)	protein_coding-intron (ENSMUST00000066427.10, intron 17 of 19)	164	ENSMUST00000141709.1	ENSMUSG00000026222	ENSMUST00000066427			Sp100			protein_coding
Sox9_E11_Sample1_peak_1339	chr1	85735880	85736659	+	246	NA	intron (ENSMUST00000159325.2, intron 1 of 2)	protein_coding-intron (ENSMUST00000064788.13, intron 1 of 5)	285	ENSMUST00000161453.1	ENSMUSG00000052760	ENSMUST00000159122			A630001G21Rik			protein_coding
Sox9_E11_Sample1_peak_1340	chr1	85758591	85759059	+	93	NA	intron (ENSMUST00000159122.7, intron 3 of 7)	protein_coding-intron (ENSMUST00000159122.7, intron 3 of 7)	-4969	ENSMUST00000175454.3	ENSMUSG00000094834	ENSMUST00000175454			Gm25472			miRNA
Sox9_E11_Sample1_peak_1341	chr1	85793126	85794725	+	439	NA	promoter-TSS (ENSMUST00000097666.3)	protein_coding-promoter-TSS (ENSMUST00000097666.3)	384	ENSMUST00000126962.2	ENSMUSG00000036707	ENSMUST00000187623			Cab39			protein_coding
Sox9_E11_Sample1_peak_1342	chr1	85810043	85811203	+	108	NA	intron (ENSMUST00000097666.3, intron 2 of 9)	protein_coding-intron (ENSMUST00000097666.3, intron 2 of 9)	16112	ENSMUST00000097666.3	ENSMUSG00000036707	ENSMUST00000187623			Cab39			protein_coding
Sox9_E11_Sample1_peak_1343	chr1	85838164	85839561	+	39	NA	intron (ENSMUST00000113360.7, intron 4 of 8)	protein_coding-intron (ENSMUST00000097666.3, intron 5 of 9)	-4218	ENSMUST00000187623.1	ENSMUSG00000036707	ENSMUST00000187623			Cab39			protein_coding
Sox9_E11_Sample1_peak_1345	chr1	85894221	85895690	+	217	NA	intron (ENSMUST00000027425.15, intron 1 of 5)	protein_coding-intron (ENSMUST00000027425.15, intron 1 of 5)	336	ENSMUST00000185569.1	ENSMUSG00000026223	ENSMUST00000185569			Itm2c			protein_coding
Sox9_E11_Sample1_peak_1346	chr1	85908868	85909797	+	165	NA	TTS (ENSMUST00000027425.15)	protein_coding-TTS (ENSMUST00000027425.15)	3171	ENSMUST00000139837.1	ENSMUSG00000026223	ENSMUST00000185569			Itm2c			protein_coding
Sox9_E11_Sample1_peak_1347	chr1	85916087	85917547	+	113	NA	Intergenic	Intergenic	10656	ENSMUST00000139837.1	ENSMUSG00000026223	ENSMUST00000185569			Itm2c			protein_coding
Sox9_E11_Sample1_peak_1348	chr1	85933835	85934149	+	58	NA	exon (ENSMUST00000190367.1, exon 2 of 2)	lncRNA-exon (ENSMUST00000190367.1, exon 2 of 2)	3340	ENSMUST00000190367.1	ENSMUSG00000099767	ENSMUST00000190367			Gm28884			lncRNA
Sox9_E11_Sample1_peak_1349	chr1	85936371	85937119	+	30	NA	exon (ENSMUST00000190367.1, exon 1 of 2)	lncRNA-exon (ENSMUST00000190367.1, exon 1 of 2)	587	ENSMUST00000190367.1	ENSMUSG00000099767	ENSMUST00000190367			Gm28884			lncRNA
Sox9_E11_Sample1_peak_1350	chr1	86018232	86019079	+	171	NA	exon (ENSMUST00000149469.2, exon 1 of 4)	protein_coding-exon (ENSMUST00000149469.2, exon 1 of 4)	587	ENSMUST00000149469.2	ENSMUSG00000026226	ENSMUST00000113344			Spata3			protein_coding
Sox9_E11_Sample1_peak_1351	chr1	86038456	86038942	+	46	NA	Intergenic	Intergenic	-7164	ENSMUST00000165824.2	ENSMUSG00000026227	ENSMUST00000027429			2810459M11Rik			protein_coding
Sox9_E11_Sample1_peak_1352	chr1	86045749	86047184	+	136	NA	exon (ENSMUST00000027429.10, exon 1 of 3)	protein_coding-exon (ENSMUST00000027429.10, exon 1 of 3)	603	ENSMUST00000027429.10	ENSMUSG00000026227	ENSMUST00000027429			2810459M11Rik			protein_coding
Sox9_E11_Sample1_peak_1353	chr1	86059161	86059868	+	159	NA	Intergenic	Intergenic	-4873	ENSMUST00000147807.7	ENSMUSG00000026229	ENSMUST00000149946			Psmd1			protein_coding
Sox9_E11_Sample1_peak_1354	chr1	86064286	86065226	+	306	NA	promoter-TSS (ENSMUST00000127104.1)	protein_coding-promoter-TSS (ENSMUST00000127104.1)	64	ENSMUST00000133480.7	ENSMUSG00000026229	ENSMUST00000149946			Psmd1			protein_coding
Sox9_E11_Sample1_peak_1355	chr1	86154213	86155187	+	334	NA	promoter-TSS (ENSMUST00000027434.14)	protein_coding-promoter-TSS (ENSMUST00000027434.14)	-80	ENSMUST00000123618.7	ENSMUSG00000062590	ENSMUST00000155168			Armc9			protein_coding
Sox9_E11_Sample1_peak_1356	chr1	86302901	86303931	+	294	NA	promoter-TSS (ENSMUST00000188695.1)	protein_coding-promoter-TSS (ENSMUST00000188695.1)	-115	ENSMUST00000188695.1	ENSMUSG00000079445	ENSMUST00000113306			B3gnt7			protein_coding
Sox9_E11_Sample1_peak_1357	chr1	86310755	86311835	+	192	NA	Intergenic	Intergenic	-7236	ENSMUST00000187004.1	ENSMUSG00000099644	ENSMUST00000187004			Gm28626			lncRNA
Sox9_E11_Sample1_peak_1358	chr1	86339366	86339686	+	41	NA	Intergenic	Intergenic	11487	ENSMUST00000186141.1	ENSMUSG00000101853	ENSMUST00000186141			Gm28627			processed_pseudogene
Sox9_E11_Sample1_peak_1359	chr1	86358759	86360141	+	418	NA	promoter-TSS (ENSMUST00000027438.7)	protein_coding-promoter-TSS (ENSMUST00000027438.7)	-50	ENSMUST00000027438.7	ENSMUSG00000026234	ENSMUST00000188682			Ncl			protein_coding
Sox9_E11_Sample1_peak_1360	chr1	86434137	86435529	+	223	NA	Intergenic	Intergenic	8504	ENSMUST00000046004.5	ENSMUSG00000036574	ENSMUST00000046004			Tex44			protein_coding
Sox9_E11_Sample1_peak_1361	chr1	86440639	86442982	+	220	NA	Intergenic	Intergenic	15481	ENSMUST00000046004.5	ENSMUSG00000036574	ENSMUST00000046004			Tex44			protein_coding
Sox9_E11_Sample1_peak_1362	chr1	86449693	86450414	+	53	NA	Intergenic	Intergenic	-23606	ENSMUST00000163337.3	ENSMUSG00000101328	ENSMUST00000163337			Rpl30-ps6			processed_pseudogene
Sox9_E11_Sample1_peak_1363	chr1	86471838	86472868	+	87	NA	Intergenic	Intergenic	-1306	ENSMUST00000163337.3	ENSMUSG00000101328	ENSMUST00000163337			Rpl30-ps6			processed_pseudogene
Sox9_E11_Sample1_peak_1365	chr1	86487165	86488142	+	259	NA	Intergenic	Intergenic	13994	ENSMUST00000163337.3	ENSMUSG00000101328	ENSMUST00000163337			Rpl30-ps6			processed_pseudogene
Sox9_E11_Sample1_peak_1366	chr1	86502902	86504621	+	448	NA	Intergenic	Intergenic	-22965	ENSMUST00000045897.14	ENSMUSG00000026238	ENSMUST00000045897			Ptma			protein_coding
Sox9_E11_Sample1_peak_1367	chr1	86525067	86526932	+	150	NA	promoter-TSS (ENSMUST00000045897.14)	protein_coding-promoter-TSS (ENSMUST00000045897.14)	-727	ENSMUST00000045897.14	ENSMUSG00000026238	ENSMUST00000045897			Ptma			protein_coding
Sox9_E11_Sample1_peak_1368	chr1	86531574	86532628	+	134	NA	Intergenic	Intergenic	5294	ENSMUST00000188533.1	ENSMUSG00000026238	ENSMUST00000045897			Ptma			protein_coding
Sox9_E11_Sample1_peak_1369	chr1	86581950	86582909	+	553	NA	promoter-TSS (ENSMUST00000121534.7)	protein_coding-promoter-TSS (ENSMUST00000121534.7)	88	ENSMUST00000150653.1	ENSMUSG00000026239	ENSMUST00000027444			Pde6d			protein_coding
Sox9_E11_Sample1_peak_1370	chr1	86669669	86670994	+	309	NA	intron (ENSMUST00000027449.5, intron 1 of 2)	protein_coding-intron (ENSMUST00000027449.5, intron 1 of 2)	240	ENSMUST00000027449.5	ENSMUSG00000026241	ENSMUST00000027449			Nppc			protein_coding
Sox9_E11_Sample1_peak_1371	chr1	86703348	86704395	+	223	NA	promoter-TSS (ENSMUST00000065694.7)	protein_coding-promoter-TSS (ENSMUST00000065694.7)	28	ENSMUST00000065694.7	ENSMUSG00000053333	ENSMUST00000186682			Dis3l2			protein_coding
Sox9_E11_Sample1_peak_1372	chr1	87011260	87012154	+	76	NA	intron (ENSMUST00000190618.6, intron 14 of 20)	protein_coding-intron (ENSMUST00000065694.7, intron 13 of 20)	23437	ENSMUST00000195266.1	ENSMUSG00000102956	ENSMUST00000195266			Gm37017			TEC
Sox9_E11_Sample1_peak_1373	chr1	87030511	87031145	+	66	NA	intron (ENSMUST00000168237.7, intron 15 of 21)	protein_coding-intron (ENSMUST00000065694.7, intron 14 of 20)	-5895	ENSMUST00000195625.1	ENSMUSG00000103984	ENSMUST00000195625			Gm37447			TEC
Sox9_E11_Sample1_peak_1374	chr1	87035529	87036473	+	123	NA	promoter-TSS (ENSMUST00000195625.1)	TEC-promoter-TSS (ENSMUST00000195625.1)	-722	ENSMUST00000195625.1	ENSMUSG00000103984	ENSMUST00000195625			Gm37447			TEC
Sox9_E11_Sample1_peak_1375	chr1	87041322	87042212	+	103	NA	intron (ENSMUST00000168237.7, intron 15 of 21)	protein_coding-intron (ENSMUST00000065694.7, intron 14 of 20)	5044	ENSMUST00000195625.1	ENSMUSG00000103984	ENSMUST00000195625			Gm37447			TEC
Sox9_E11_Sample1_peak_1377	chr1	87154289	87154617	+	22	NA	TTS (ENSMUST00000159662.1)	protein_coding-TTS (ENSMUST00000159662.1)	574	ENSMUST00000027463.10	ENSMUSG00000026247	ENSMUST00000159662			Ecel1			protein_coding
Sox9_E11_Sample1_peak_1379	chr1	87186301	87187190	+	98	NA	exon (ENSMUST00000044533.8, exon 9 of 13)	protein_coding-exon (ENSMUST00000044533.8, exon 9 of 13)	3432	ENSMUST00000044533.8	ENSMUSG00000036480	ENSMUST00000044533			Prss56			protein_coding
Sox9_E11_Sample1_peak_1380	chr1	87213669	87214982	+	380	NA	promoter-TSS (ENSMUST00000113231.3)	protein_coding-promoter-TSS (ENSMUST00000113231.3)	39	ENSMUST00000113231.3	ENSMUSG00000026254	ENSMUST00000076362			Eif4e2			protein_coding
Sox9_E11_Sample1_peak_1382	chr1	87264290	87265300	+	50	NA	intron (ENSMUST00000118687.7, intron 1 of 4)	protein_coding-intron (ENSMUST00000027472.6, intron 1 of 3)	379	ENSMUST00000138844.2	ENSMUSG00000089821	ENSMUST00000138844			Efhd1os			lncRNA
Sox9_E11_Sample1_peak_1383	chr1	87270249	87271150	+	100	NA	intron (ENSMUST00000118687.7, intron 1 of 4)	protein_coding-intron (ENSMUST00000027472.6, intron 1 of 3)	-5525	ENSMUST00000138844.2	ENSMUSG00000089821	ENSMUST00000138844			Efhd1os			lncRNA
Sox9_E11_Sample1_peak_1384	chr1	87326762	87327853	+	260	NA	exon (ENSMUST00000187038.1, exon 1 of 1)	protein_coding-exon (ENSMUST00000187038.1, exon 1 of 1)	241	ENSMUST00000173173.7	ENSMUSG00000048000	ENSMUST00000172794			Gigyf2			protein_coding
Sox9_E11_Sample1_peak_1385	chr1	87393726	87394921	+	113	NA	intron (ENSMUST00000113212.3, intron 1 of 2)	protein_coding-intron (ENSMUST00000027475.14, intron 8 of 28)	406	ENSMUST00000113212.3	ENSMUSG00000079436	ENSMUST00000174179			Kcnj13			protein_coding
Sox9_E11_Sample1_peak_1386	chr1	87475316	87475748	+	46	NA	TTS (ENSMUST00000027476.5)	protein_coding-TTS (ENSMUST00000027476.5)	2993	ENSMUST00000191095.1	ENSMUSG00000026258	ENSMUST00000027476			Snorc			protein_coding
Sox9_E11_Sample1_peak_1387	chr1	87509488	87510797	+	108	NA	exon (ENSMUST00000027477.14, exon 1 of 13)	protein_coding-exon (ENSMUST00000027477.14, exon 1 of 13)	220	ENSMUST00000027477.14	ENSMUSG00000026259	ENSMUST00000068681			Ngef			protein_coding
Sox9_E11_Sample1_peak_1388	chr1	87755655	87756573	+	166	NA	promoter-TSS (ENSMUST00000113186.7)	protein_coding-promoter-TSS (ENSMUST00000113186.7)	21	ENSMUST00000134603.1	ENSMUSG00000026289	ENSMUST00000113186			Atg16l1			protein_coding
Sox9_E11_Sample1_peak_1389	chr1	87852947	87854002	+	315	NA	exon (ENSMUST00000187511.1, exon 2 of 2)	lncRNA-exon (ENSMUST00000187511.1, exon 2 of 2)	187	ENSMUST00000027517.13	ENSMUSG00000070738	ENSMUST00000189448			Dgkd			protein_coding
Sox9_E11_Sample1_peak_1390	chr1	88007862	88008622	+	148	NA	promoter-TSS (ENSMUST00000187871.1)	protein_coding-promoter-TSS (ENSMUST00000187871.1)	-13	ENSMUST00000187871.1	ENSMUSG00000005501	ENSMUST00000187871			Usp40			protein_coding
Sox9_E11_Sample1_peak_1392	chr1	88205475	88205968	+	111	NA	promoter-TSS (ENSMUST00000119972.3)	protein_coding-promoter-TSS (ENSMUST00000119972.3)	61	ENSMUST00000119972.3	ENSMUSG00000081984	ENSMUST00000119972			Dnajb3			protein_coding
Sox9_E11_Sample1_peak_1393	chr1	88428547	88429025	+	74	NA	Intergenic	Intergenic	21380	ENSMUST00000189225.1	ENSMUSG00000026295	ENSMUST00000176708			Spp2			protein_coding
Sox9_E11_Sample1_peak_1394	chr1	88475331	88476074	+	73	NA	Intergenic	Intergenic	-13094	ENSMUST00000190783.1	ENSMUSG00000099553	ENSMUST00000190783			Gm29538			lncRNA
Sox9_E11_Sample1_peak_1395	chr1	88502691	88503354	+	81	NA	intron (ENSMUST00000067625.8, intron 2 of 2)	protein_coding-intron (ENSMUST00000067625.8, intron 2 of 2)	7044	ENSMUST00000067625.8	ENSMUSG00000062310	ENSMUST00000067625			Glrp1			protein_coding
Sox9_E11_Sample1_peak_1396	chr1	88534026	88534718	+	68	NA	Intergenic	Intergenic	-17145	ENSMUST00000189394.1	ENSMUSG00000100798	ENSMUST00000189394			Gm19589			lncRNA
Sox9_E11_Sample1_peak_1399	chr1	88605683	88606325	+	41	NA	Intergenic	Intergenic	-47081	ENSMUST00000194311.1	ENSMUSG00000104057	ENSMUST00000194311			Gm38130			TEC
Sox9_E11_Sample1_peak_1400	chr1	88608274	88608703	+	49	NA	Intergenic	Intergenic	-44597	ENSMUST00000194311.1	ENSMUSG00000104057	ENSMUST00000194311			Gm38130			TEC
Sox9_E11_Sample1_peak_1401	chr1	88638859	88640527	+	132	NA	Intergenic	Intergenic	-13392	ENSMUST00000194311.1	ENSMUSG00000104057	ENSMUST00000194311			Gm38130			TEC
Sox9_E11_Sample1_peak_1402	chr1	88669448	88670863	+	46	NA	Intergenic	Intergenic	13847	ENSMUST00000186042.1	ENSMUSG00000100367	ENSMUST00000186042			Gm29336			lncRNA
Sox9_E11_Sample1_peak_1403	chr1	88700407	88702508	+	85	NA	exon (ENSMUST00000051236.10, exon 1 of 3)	protein_coding-exon (ENSMUST00000051236.10, exon 1 of 3)	419	ENSMUST00000187810.1	ENSMUSG00000049866	ENSMUST00000051236			Arl4c			protein_coding
Sox9_E11_Sample1_peak_1404	chr1	88705376	88705960	+	37	NA	Intergenic	Intergenic	-3447	ENSMUST00000159814.1	ENSMUSG00000049866	ENSMUST00000051236			Arl4c			protein_coding
Sox9_E11_Sample1_peak_1407	chr1	88938301	88938737	+	46	NA	Intergenic	Intergenic	6200	ENSMUST00000188327.1	ENSMUSG00000101333	ENSMUST00000188327			Gm4753			processed_pseudogene
Sox9_E11_Sample1_peak_1408	chr1	89069669	89071116	+	271	NA	promoter-TSS (ENSMUST00000066279.10)	protein_coding-promoter-TSS (ENSMUST00000066279.10)	-23	ENSMUST00000066279.10	ENSMUSG00000036206	ENSMUST00000066279			Sh3bp4			protein_coding
Sox9_E11_Sample1_peak_1409	chr1	89092232	89093070	+	143	NA	intron (ENSMUST00000066279.10, intron 1 of 5)	protein_coding-intron (ENSMUST00000066279.10, intron 1 of 5)	-4422	ENSMUST00000195426.1	ENSMUSG00000102700	ENSMUST00000195426			Gm38312			TEC
Sox9_E11_Sample1_peak_1410	chr1	89103823	89104403	+	32	NA	intron (ENSMUST00000066279.10, intron 1 of 5)	protein_coding-intron (ENSMUST00000066279.10, intron 1 of 5)	7040	ENSMUST00000195426.1	ENSMUSG00000102700	ENSMUST00000195426			Gm38312			TEC
Sox9_E11_Sample1_peak_1411	chr1	89108453	89110174	+	77	NA	intron (ENSMUST00000066279.10, intron 2 of 5)	protein_coding-intron (ENSMUST00000066279.10, intron 2 of 5)	12240	ENSMUST00000195426.1	ENSMUSG00000102700	ENSMUST00000195426			Gm38312			TEC
Sox9_E11_Sample1_peak_1412	chr1	89164818	89165912	+	108	NA	Intergenic	Intergenic	68292	ENSMUST00000195426.1	ENSMUSG00000102700	ENSMUST00000195426			Gm38312			TEC
Sox9_E11_Sample1_peak_1413	chr1	89183039	89183979	+	140	NA	Intergenic	Intergenic	73472	ENSMUST00000191231.1	ENSMUSG00000102083	ENSMUST00000191231			Gm5259			processed_pseudogene
Sox9_E11_Sample1_peak_1414	chr1	89191266	89191724	+	181	NA	Intergenic	Intergenic	65486	ENSMUST00000191231.1	ENSMUSG00000102083	ENSMUST00000191231			Gm5259			processed_pseudogene
Sox9_E11_Sample1_peak_1415	chr1	89454086	89456064	+	178	NA	promoter-TSS (ENSMUST00000185417.1)	protein_coding-promoter-TSS (ENSMUST00000185417.1)	-181	ENSMUST00000185417.1	ENSMUSG00000055013	ENSMUST00000190096			Agap1			protein_coding
Sox9_E11_Sample1_peak_1416	chr1	89494762	89495292	+	32	NA	intron (ENSMUST00000190096.6, intron 1 of 16)	protein_coding-intron (ENSMUST00000027521.14, intron 1 of 17)	11589	ENSMUST00000192974.1	ENSMUSG00000104114	ENSMUST00000192974			Gm37297			TEC
Sox9_E11_Sample1_peak_1417	chr1	89516146	89518390	+	81	NA	intron (ENSMUST00000190096.6, intron 1 of 16)	protein_coding-intron (ENSMUST00000027521.14, intron 1 of 17)	33830	ENSMUST00000192974.1	ENSMUSG00000104114	ENSMUST00000192974			Gm37297			TEC
Sox9_E11_Sample1_peak_1420	chr1	89580114	89581704	+	171	NA	exon (ENSMUST00000074945.7, exon 1 of 18)	protein_coding-exon (ENSMUST00000074945.7, exon 1 of 18)	673	ENSMUST00000074945.7	ENSMUSG00000055013	ENSMUST00000190096			Agap1			protein_coding
Sox9_E11_Sample1_peak_1422	chr1	89646354	89646857	+	100	NA	intron (ENSMUST00000074945.7, intron 7 of 17)	protein_coding-intron (ENSMUST00000027521.14, intron 6 of 17)	37283	ENSMUST00000187011.1	ENSMUSG00000102009	ENSMUST00000187295			4933400F21Rik			lncRNA
Sox9_E11_Sample1_peak_1423	chr1	89673197	89673780	+	60	NA	intron (ENSMUST00000190096.6, intron 9 of 16)	protein_coding-intron (ENSMUST00000027521.14, intron 9 of 17)	10400	ENSMUST00000187011.1	ENSMUSG00000102009	ENSMUST00000187295			4933400F21Rik			lncRNA
Sox9_E11_Sample1_peak_1424	chr1	89718352	89719433	+	103	NA	intron (ENSMUST00000190096.6, intron 9 of 16)	protein_coding-intron (ENSMUST00000027521.14, intron 9 of 17)	34090	ENSMUST00000158150.1	ENSMUSG00000088775	ENSMUST00000158150			Gm26037			misc_RNA
Sox9_E11_Sample1_peak_1426	chr1	89885337	89886069	+	68	NA	intron (ENSMUST00000190096.6, intron 15 of 16)	protein_coding-intron (ENSMUST00000027521.14, intron 16 of 17)	43482	ENSMUST00000187633.1	ENSMUSG00000034486	ENSMUST00000036954			Gbx2			protein_coding
Sox9_E11_Sample1_peak_1427	chr1	89930486	89931562	+	71	NA	exon (ENSMUST00000036954.8, exon 1 of 2)	protein_coding-exon (ENSMUST00000036954.8, exon 1 of 2)	155	ENSMUST00000036954.8	ENSMUSG00000034486	ENSMUST00000036954			Gbx2			protein_coding
Sox9_E11_Sample1_peak_1428	chr1	89940157	89940633	+	37	NA	Intergenic	Intergenic	-9216	ENSMUST00000036954.8	ENSMUSG00000034486	ENSMUST00000036954			Gbx2			protein_coding
Sox9_E11_Sample1_peak_1429	chr1	89943447	89943857	+	38	NA	Intergenic	Intergenic	-12473	ENSMUST00000036954.8	ENSMUSG00000034486	ENSMUST00000036954			Gbx2			protein_coding
Sox9_E11_Sample1_peak_1430	chr1	89968195	89969023	+	166	NA	exon (ENSMUST00000086882.7, exon 4 of 6)	protein_coding-exon (ENSMUST00000086882.7, exon 4 of 6)	27843	ENSMUST00000238685.1	ENSMUSG00000067081	ENSMUST00000238685			Asb18			protein_coding
Sox9_E11_Sample1_peak_1431	chr1	90152967	90154023	+	78	NA	promoter-TSS (ENSMUST00000113094.8)	protein_coding-promoter-TSS (ENSMUST00000113094.8)	-94	ENSMUST00000113094.8	ENSMUSG00000026301	ENSMUST00000212394			Iqca			protein_coding
Sox9_E11_Sample1_peak_1432	chr1	90202306	90203903	+	145	NA	promoter-TSS (ENSMUST00000065587.4)	protein_coding-promoter-TSS (ENSMUST00000065587.4)	-876	ENSMUST00000065587.4	ENSMUSG00000044337	ENSMUST00000159654			Ackr3			protein_coding
Sox9_E11_Sample1_peak_1433	chr1	90297646	90298348	+	110	NA	Intergenic	Intergenic	17539	ENSMUST00000188640.1	ENSMUSG00000101028	ENSMUST00000188640			Gm28723			lncRNA
Sox9_E11_Sample1_peak_1434	chr1	90442521	90442941	+	26	NA	Intergenic	Intergenic	11770	ENSMUST00000187630.1	ENSMUSG00000101997	ENSMUST00000187630			Gm28722			lncRNA
Sox9_E11_Sample1_peak_1435	chr1	90451446	90451895	+	60	NA	Intergenic	Intergenic	2831	ENSMUST00000187630.1	ENSMUSG00000101997	ENSMUST00000187630			Gm28722			lncRNA
Sox9_E11_Sample1_peak_1436	chr1	90602935	90603714	+	122	NA	promoter-TSS (ENSMUST00000186152.6)	protein_coding-promoter-TSS (ENSMUST00000186152.6)	-152	ENSMUST00000191510.6	ENSMUSG00000034432	ENSMUST00000186882			Cops8			protein_coding
Sox9_E11_Sample1_peak_1437	chr1	90775628	90776311	+	60	NA	exon (ENSMUST00000056925.15, exon 40 of 44)	protein_coding-exon (ENSMUST00000056925.15, exon 40 of 44)	-2754	ENSMUST00000150769.1	ENSMUSG00000048126	ENSMUST00000056925			Col6a3			protein_coding
Sox9_E11_Sample1_peak_1438	chr1	90927574	90928780	+	158	NA	exon (ENSMUST00000027528.6, exon 3 of 16)	protein_coding-exon (ENSMUST00000027528.6, exon 3 of 16)	498	ENSMUST00000125149.1	ENSMUSG00000026303	ENSMUST00000136220			Mlph			protein_coding
Sox9_E11_Sample1_peak_1439	chr1	90962708	90963308	+	85	NA	intron (ENSMUST00000128226.7, intron 1 of 4)	protein_coding-intron (ENSMUST00000027529.11, intron 2 of 5)	4609	ENSMUST00000135819.1	ENSMUSG00000026304	ENSMUST00000131428			Rab17			protein_coding
Sox9_E11_Sample1_peak_1441	chr1	90998321	90999506	+	111	NA	intron (ENSMUST00000189505.6, intron 1 of 12)	protein_coding-intron (ENSMUST00000068116.12, intron 1 of 12)	134	ENSMUST00000068116.12	ENSMUSG00000026305	ENSMUST00000185531			Lrrfip1			protein_coding
Sox9_E11_Sample1_peak_1442	chr1	91044116	91045042	+	71	NA	intron (ENSMUST00000189505.6, intron 1 of 12)	protein_coding-intron (ENSMUST00000068116.12, intron 1 of 12)	-8865	ENSMUST00000068167.12	ENSMUSG00000026305	ENSMUST00000185531			Lrrfip1			protein_coding
Sox9_E11_Sample1_peak_1443	chr1	91052735	91054228	+	304	NA	promoter-TSS (ENSMUST00000068167.12)	protein_coding-promoter-TSS (ENSMUST00000068167.12)	-26	ENSMUST00000186762.6	ENSMUSG00000026305	ENSMUST00000185531			Lrrfip1			protein_coding
Sox9_E11_Sample1_peak_1444	chr1	91076946	91078382	+	38	NA	intron (ENSMUST00000097650.9, intron 4 of 22)	protein_coding-intron (ENSMUST00000068116.12, intron 2 of 12)	24078	ENSMUST00000189617.2	ENSMUSG00000026305	ENSMUST00000185531			Lrrfip1			protein_coding
Sox9_E11_Sample1_peak_1445	chr1	91085955	91086656	+	76	NA	intron (ENSMUST00000186762.6, intron 3 of 4)	protein_coding-intron (ENSMUST00000068116.12, intron 2 of 12)	-24909	ENSMUST00000188094.6	ENSMUSG00000026305	ENSMUST00000185531			Lrrfip1			protein_coding
Sox9_E11_Sample1_peak_1446	chr1	91179279	91181933	+	102	NA	intron (ENSMUST00000188475.6, intron 1 of 3)	protein_coding-intron (ENSMUST00000097648.5, intron 1 of 2)	560	ENSMUST00000097648.5	ENSMUSG00000034353	ENSMUST00000097648			Ramp1			protein_coding
Sox9_E11_Sample1_peak_1447	chr1	91249726	91251110	+	296	NA	promoter-TSS (ENSMUST00000171112.7)	protein_coding-promoter-TSS (ENSMUST00000171112.7)	53	ENSMUST00000191368.6	ENSMUSG00000034343	ENSMUST00000191533			Ube2f			protein_coding
Sox9_E11_Sample1_peak_1448	chr1	91297920	91298957	+	284	NA	promoter-TSS (ENSMUST00000027532.12)	protein_coding-promoter-TSS (ENSMUST00000027532.12)	11	ENSMUST00000142802.1	ENSMUSG00000026307	ENSMUST00000142802			Scly			protein_coding
Sox9_E11_Sample1_peak_1449	chr1	91345061	91345502	+	32	NA	exon (ENSMUST00000088904.9, exon 9 of 9)	protein_coding-exon (ENSMUST00000088904.9, exon 9 of 9)	-5735	ENSMUST00000027533.8	ENSMUSG00000026308	ENSMUST00000027533			Klhl30			protein_coding
Sox9_E11_Sample1_peak_1451	chr1	91366212	91367064	+	243	NA	exon (ENSMUST00000086861.11, exon 1 of 8)	protein_coding-exon (ENSMUST00000086861.11, exon 1 of 8)	208	ENSMUST00000086861.11	ENSMUSG00000047443	ENSMUST00000086861			Erfe			protein_coding
Sox9_E11_Sample1_peak_1452	chr1	91398134	91399082	+	260	NA	promoter-TSS (ENSMUST00000187049.6)	protein_coding-promoter-TSS (ENSMUST00000187049.6)	92	ENSMUST00000187049.6	ENSMUSG00000026309	ENSMUST00000187306			Ilkap			protein_coding
Sox9_E11_Sample1_peak_1453	chr1	91412625	91414521	+	274	NA	promoter-TSS (ENSMUST00000086851.1)	protein_coding-promoter-TSS (ENSMUST00000086851.1)	-351	ENSMUST00000086851.1	ENSMUSG00000067071	ENSMUST00000086851			Hes6			protein_coding
Sox9_E11_Sample1_peak_1454	chr1	91442401	91443234	+	111	NA	intron (ENSMUST00000069620.9, intron 6 of 22)	protein_coding-intron (ENSMUST00000069620.9, intron 6 of 22)	7048	ENSMUST00000185298.1	ENSMUSG00000055866	ENSMUST00000185298			Per2			protein_coding
Sox9_E11_Sample1_peak_1455	chr1	91448688	91449225	+	76	NA	intron (ENSMUST00000069620.9, intron 3 of 22)	protein_coding-intron (ENSMUST00000069620.9, intron 3 of 22)	909	ENSMUST00000185298.1	ENSMUSG00000055866	ENSMUST00000185298			Per2			protein_coding
Sox9_E11_Sample1_peak_1456	chr1	91456235	91456610	+	62	NA	intron (ENSMUST00000069620.9, intron 1 of 22)	protein_coding-intron (ENSMUST00000069620.9, intron 1 of 22)	2902	ENSMUST00000069620.9	ENSMUSG00000055866	ENSMUST00000185298			Per2			protein_coding
Sox9_E11_Sample1_peak_1457	chr1	91458472	91459843	+	245	NA	intron (ENSMUST00000069620.9, intron 1 of 22)	protein_coding-intron (ENSMUST00000069620.9, intron 1 of 22)	167	ENSMUST00000069620.9	ENSMUSG00000055866	ENSMUST00000185298			Per2			protein_coding
Sox9_E11_Sample1_peak_1458	chr1	91465205	91465526	+	39	NA	Intergenic	Intergenic	4733	ENSMUST00000188403.1	ENSMUSG00000101911	ENSMUST00000188403			Gm28381			processed_pseudogene
Sox9_E11_Sample1_peak_1459	chr1	91494175	91495304	+	132	NA	promoter-TSS (ENSMUST00000047242.8)	protein_coding-promoter-TSS (ENSMUST00000047242.8)	45	ENSMUST00000047242.8	ENSMUSG00000034292	ENSMUST00000187588			Traf3ip1			protein_coding
Sox9_E11_Sample1_peak_1460	chr1	91539957	91541105	+	222	NA	promoter-TSS (ENSMUST00000027538.8)	protein_coding-promoter-TSS (ENSMUST00000027538.8)	-13	ENSMUST00000086843.10	ENSMUSG00000026311	ENSMUST00000086843			Asb1			protein_coding
Sox9_E11_Sample1_peak_1463	chr1	91801412	91802049	+	32	NA	exon (ENSMUST00000007949.3, exon 1 of 2)	protein_coding-exon (ENSMUST00000007949.3, exon 1 of 2)	260	ENSMUST00000186075.1	ENSMUSG00000007805	ENSMUST00000186075			Twist2			protein_coding
Sox9_E11_Sample1_peak_1464	chr1	91872029	91872918	+	61	NA	Intergenic	Intergenic	-43787	ENSMUST00000193764.1	ENSMUSG00000102745	ENSMUST00000193764			Gm37600			TEC
Sox9_E11_Sample1_peak_1465	chr1	92051303	92052196	+	119	NA	intron (ENSMUST00000212408.1, intron 3 of 3)	protein_coding-intron (ENSMUST00000008995.14, intron 2 of 25)	-29652	ENSMUST00000192836.1	ENSMUSG00000102565	ENSMUST00000192836			Gm37036			TEC
Sox9_E11_Sample1_peak_1466	chr1	92179686	92181109	+	318	NA	promoter-TSS (ENSMUST00000097644.8)	protein_coding-promoter-TSS (ENSMUST00000097644.8)	-56	ENSMUST00000097644.8	ENSMUSG00000026313	ENSMUST00000212408			Hdac4			protein_coding
Sox9_E11_Sample1_peak_1467	chr1	92437730	92438667	+	119	NA	TTS (ENSMUST00000027478.6)	protein_coding-TTS (ENSMUST00000027478.6)	-7666	ENSMUST00000190873.1	ENSMUSG00000101522	ENSMUST00000190873			Gm7837			processed_pseudogene
Sox9_E11_Sample1_peak_1468	chr1	92473446	92474360	+	181	NA	promoter-TSS (ENSMUST00000027478.6)	protein_coding-promoter-TSS (ENSMUST00000027478.6)	-43	ENSMUST00000027478.6	ENSMUSG00000026260	ENSMUST00000185466			Ndufa10			protein_coding
Sox9_E11_Sample1_peak_1469	chr1	92641540	92642512	+	128	NA	promoter-TSS (ENSMUST00000097642.3)	protein_coding-promoter-TSS (ENSMUST00000097642.3)	-41	ENSMUST00000129730.1	ENSMUSG00000073616	ENSMUST00000148508			Cops9			protein_coding
Sox9_E11_Sample1_peak_1470	chr1	92647789	92648929	+	132	NA	promoter-TSS (ENSMUST00000159803.1)	protein_coding-promoter-TSS (ENSMUST00000159803.1)	-105	ENSMUST00000159803.1	ENSMUSG00000044055	ENSMUST00000053144			Otos			protein_coding
Sox9_E11_Sample1_peak_1471	chr1	92774412	92775463	+	139	NA	Intergenic	Intergenic	-14457	ENSMUST00000187845.1	ENSMUSG00000099665	ENSMUST00000187845			Gm29482			lncRNA
Sox9_E11_Sample1_peak_1472	chr1	92790571	92791723	+	117	NA	Intergenic	Intergenic	-30667	ENSMUST00000187845.1	ENSMUSG00000099665	ENSMUST00000187845			Gm29482			lncRNA
Sox9_E11_Sample1_peak_1473	chr1	92831225	92832966	+	320	NA	exon (ENSMUST00000045970.7, exon 1 of 9)	protein_coding-exon (ENSMUST00000045970.7, exon 1 of 9)	126	ENSMUST00000191373.1	ENSMUSG00000034220	ENSMUST00000045970			Gpc1			protein_coding
Sox9_E11_Sample1_peak_1475	chr1	92906931	92907528	+	311	NA	exon (ENSMUST00000060913.7, exon 1 of 2)	protein_coding-exon (ENSMUST00000060913.7, exon 1 of 2)	248	ENSMUST00000060913.7	ENSMUSG00000047067	ENSMUST00000060913			Dusp28			protein_coding
Sox9_E11_Sample1_peak_1476	chr1	92910646	92911432	+	178	NA	promoter-TSS (ENSMUST00000178116.7)	protein_coding-promoter-TSS (ENSMUST00000178116.7)	-82	ENSMUST00000178116.7	ENSMUSG00000026269	ENSMUST00000178778			Rnpepl1			protein_coding
Sox9_E11_Sample1_peak_1477	chr1	92934109	92935332	+	510	NA	promoter-TSS (ENSMUST00000117814.7)	protein_coding-promoter-TSS (ENSMUST00000117814.7)	-46	ENSMUST00000117814.7	ENSMUSG00000026270	ENSMUST00000136598			Capn10			protein_coding
Sox9_E11_Sample1_peak_1479	chr1	92976299	92976775	+	86	NA	intron (ENSMUST00000064480.6, intron 1 of 1)	protein_coding-intron (ENSMUST00000027489.8, intron 1 of 1)	1190	ENSMUST00000064480.6	ENSMUSG00000026271	ENSMUST00000027489			Gpr35			protein_coding
Sox9_E11_Sample1_peak_1480	chr1	92978750	92979492	+	68	NA	exon (ENSMUST00000169198.2, exon 1 of 2)	protein_coding-exon (ENSMUST00000169198.2, exon 1 of 2)	199	ENSMUST00000169198.2	ENSMUSG00000026271	ENSMUST00000027489			Gpr35			protein_coding
Sox9_E11_Sample1_peak_1481	chr1	93100299	93102012	+	175	NA	intron (ENSMUST00000186861.1, intron 1 of 4)	protein_coding-intron (ENSMUST00000186861.1, intron 1 of 4)	667	ENSMUST00000171796.7	ENSMUSG00000014602	ENSMUST00000190249			Kif1a			protein_coding
Sox9_E11_Sample1_peak_1482	chr1	93114959	93115760	+	300	NA	Intergenic	Intergenic	8744	ENSMUST00000191586.1	ENSMUSG00000101378	ENSMUST00000191586			Gm28086			lncRNA
Sox9_E11_Sample1_peak_1483	chr1	93129795	93130988	+	195	NA	Intergenic	Intergenic	-4849	ENSMUST00000027491.6	ENSMUSG00000026272	ENSMUST00000191039			Agxt			protein_coding
Sox9_E11_Sample1_peak_1484	chr1	93160225	93160947	+	57	NA	intron (ENSMUST00000043718.11, intron 1 of 5)	protein_coding-intron (ENSMUST00000043718.11, intron 1 of 5)	284	ENSMUST00000143419.1	ENSMUSG00000034159	ENSMUST00000143419			Mab21l4			protein_coding
Sox9_E11_Sample1_peak_1485	chr1	93161518	93162056	+	43	NA	promoter-TSS (ENSMUST00000043718.11)	protein_coding-promoter-TSS (ENSMUST00000043718.11)	-839	ENSMUST00000043718.11	ENSMUSG00000034159	ENSMUST00000143419			Mab21l4			protein_coding
Sox9_E11_Sample1_peak_1486	chr1	93168199	93168991	+	146	NA	promoter-TSS (ENSMUST00000138595.2)	protein_coding-promoter-TSS (ENSMUST00000138595.2)	-130	ENSMUST00000138595.2	ENSMUSG00000084989	ENSMUST00000138595			Crocc2			protein_coding
Sox9_E11_Sample1_peak_1487	chr1	93176304	93176985	+	130	NA	intron (ENSMUST00000138595.2, intron 1 of 31)	protein_coding-intron (ENSMUST00000138595.2, intron 1 of 31)	7919	ENSMUST00000138595.2	ENSMUSG00000084989	ENSMUST00000138595			Crocc2			protein_coding
Sox9_E11_Sample1_peak_1488	chr1	93223893	93224148	+	46	NA	intron (ENSMUST00000138595.2, intron 29 of 31)	protein_coding-intron (ENSMUST00000138595.2, intron 29 of 31)	-11821	ENSMUST00000062202.13	ENSMUSG00000047793	ENSMUST00000165883			Sned1			protein_coding
Sox9_E11_Sample1_peak_1489	chr1	93235556	93236720	+	332	NA	exon (ENSMUST00000062202.13, exon 1 of 31)	protein_coding-exon (ENSMUST00000062202.13, exon 1 of 31)	287	ENSMUST00000172289.7	ENSMUSG00000047793	ENSMUST00000165883			Sned1			protein_coding
Sox9_E11_Sample1_peak_1490	chr1	93305560	93306222	+	208	NA	promoter-TSS (ENSMUST00000027492.13)	protein_coding-promoter-TSS (ENSMUST00000027492.13)	-12	ENSMUST00000152307.1	ENSMUSG00000026273	ENSMUST00000152307			Mterf4			protein_coding
Sox9_E11_Sample1_peak_1491	chr1	93342566	93343987	+	680	NA	promoter-TSS (ENSMUST00000027493.3)	protein_coding-promoter-TSS (ENSMUST00000027493.3)	189	ENSMUST00000139028.1	ENSMUSG00000026274	ENSMUST00000133886			Pask			protein_coding
Sox9_E11_Sample1_peak_1492	chr1	93401291	93401749	+	46	NA	promoter-TSS (ENSMUST00000190340.1)	protein_coding-promoter-TSS (ENSMUST00000190340.1)	-341	ENSMUST00000190340.1	ENSMUSG00000034107	ENSMUST00000186641			Ano7			protein_coding
Sox9_E11_Sample1_peak_1493	chr1	93444819	93446111	+	368	NA	promoter-TSS (ENSMUST00000186787.6)	protein_coding-promoter-TSS (ENSMUST00000186787.6)	-33	ENSMUST00000186787.6	ENSMUSG00000034088	ENSMUST00000189951			Hdlbp			protein_coding
Sox9_E11_Sample1_peak_1494	chr1	93465997	93467120	+	93	NA	intron (ENSMUST00000189025.6, intron 1 of 5)	protein_coding-intron (ENSMUST00000170883.7, intron 1 of 27)	11819	ENSMUST00000188165.1	ENSMUSG00000034088	ENSMUST00000189951			Hdlbp			protein_coding
Sox9_E11_Sample1_peak_1495	chr1	93478002	93479644	+	539	NA	promoter-TSS (ENSMUST00000027495.14)	protein_coding-promoter-TSS (ENSMUST00000027495.14)	-8	ENSMUST00000189025.6	ENSMUSG00000034088	ENSMUST00000189951			Hdlbp			protein_coding
Sox9_E11_Sample1_peak_1496	chr1	93511411	93512513	+	539	NA	promoter-TSS (ENSMUST00000120301.7)	protein_coding-promoter-TSS (ENSMUST00000120301.7)	-117	ENSMUST00000120301.7	ENSMUSG00000034066	ENSMUST00000120301			Farp2			protein_coding
Sox9_E11_Sample1_peak_1497	chr1	93560402	93560838	+	46	NA	intron (ENSMUST00000122402.2, intron 3 of 12)	protein_coding-intron (ENSMUST00000120301.7, intron 3 of 26)	28805	ENSMUST00000194919.1	ENSMUSG00000103854	ENSMUST00000194919			Gm37250			TEC
Sox9_E11_Sample1_peak_1499	chr1	93634865	93636367	+	618	NA	promoter-TSS (ENSMUST00000133769.7)	protein_coding-promoter-TSS (ENSMUST00000133769.7)	13	ENSMUST00000151068.7	ENSMUSG00000026277	ENSMUST00000151068			Stk25			protein_coding
Sox9_E11_Sample1_peak_1500	chr1	93667963	93669300	+	291	NA	Intergenic	Intergenic	-9972	ENSMUST00000186287.2	ENSMUSG00000026277	ENSMUST00000151068			Stk25			protein_coding
Sox9_E11_Sample1_peak_1501	chr1	93685480	93686940	+	420	NA	promoter-TSS (ENSMUST00000188394.1)	protein_coding-promoter-TSS (ENSMUST00000188394.1)	-53	ENSMUST00000188394.1	ENSMUSG00000026278	ENSMUST00000200888			Bok			protein_coding
Sox9_E11_Sample1_peak_1502	chr1	93704751	93706057	+	60	NA	TTS (ENSMUST00000112905.3)	protein_coding-TTS (ENSMUST00000112905.3)	9578	ENSMUST00000187445.1	ENSMUSG00000026279	ENSMUST00000190116			Thap4			protein_coding
Sox9_E11_Sample1_peak_1503	chr1	93726934	93727631	+	111	NA	intron (ENSMUST00000112905.3, intron 2 of 5)	protein_coding-intron (ENSMUST00000112905.3, intron 2 of 5)	-3822	ENSMUST00000188846.1	ENSMUSG00000101952	ENSMUST00000188846			Gm10550			lncRNA
Sox9_E11_Sample1_peak_1504	chr1	93754025	93755479	+	523	NA	promoter-TSS (ENSMUST00000027502.15)	protein_coding-promoter-TSS (ENSMUST00000027502.15)	28	ENSMUST00000190116.6	ENSMUSG00000026279	ENSMUST00000190116			Thap4			protein_coding
Sox9_E11_Sample1_peak_1505	chr1	93803560	93804427	+	775	NA	promoter-TSS (ENSMUST00000027505.12)	protein_coding-promoter-TSS (ENSMUST00000027505.12)	10	ENSMUST00000188402.1	ENSMUSG00000026283	ENSMUST00000190476			Ing5			protein_coding
Sox9_E11_Sample1_peak_1506	chr1	93824737	93826002	+	411	NA	promoter-TSS (ENSMUST00000112881.7)	protein_coding-promoter-TSS (ENSMUST00000112881.7)	95	ENSMUST00000112881.7	ENSMUSG00000073609	ENSMUST00000149397			D2hgdh			protein_coding
Sox9_E11_Sample1_peak_1507	chr1	93881356	93882117	+	151	NA	Intergenic	Intergenic	19910	ENSMUST00000187896.1	ENSMUSG00000094651	ENSMUST00000187896			Gal3st2			protein_coding
Sox9_E11_Sample1_peak_1511	chr1	93948663	93949464	+	103	NA	Intergenic	Intergenic	21026	ENSMUST00000177958.1	ENSMUSG00000093805	ENSMUST00000178757			Gal3st2b			protein_coding
Sox9_E11_Sample1_peak_1512	chr1	94035009	94035917	+	532	NA	Intergenic	Intergenic	14970	ENSMUST00000050890.7	ENSMUSG00000034000	ENSMUST00000190212			Neu4			protein_coding
Sox9_E11_Sample1_peak_1513	chr1	94079009	94080754	+	105	NA	Intergenic	Intergenic	-27328	ENSMUST00000027507.7	ENSMUSG00000026285	ENSMUST00000027507			Pdcd1			protein_coding
Sox9_E11_Sample1_peak_1514	chr1	94426420	94426866	+	52	NA	Intergenic	Intergenic	43244	ENSMUST00000187459.1	ENSMUSG00000100347	ENSMUST00000187459			Gm7895			processed_pseudogene
Sox9_E11_Sample1_peak_1515	chr1	94971706	94972869	+	139	NA	Intergenic	Intergenic	67756	ENSMUST00000158685.1	ENSMUSG00000089310	ENSMUST00000158685			Gm23181			snoRNA
Sox9_E11_Sample1_peak_1516	chr1	95029043	95029561	+	39	NA	Intergenic	Intergenic	10741	ENSMUST00000158685.1	ENSMUSG00000089310	ENSMUST00000158685			Gm23181			snoRNA
Sox9_E11_Sample1_peak_1517	chr1	95313305	95314448	+	755	NA	exon (ENSMUST00000059975.7, exon 1 of 3)	protein_coding-exon (ENSMUST00000059975.7, exon 1 of 3)	248	ENSMUST00000186780.1	ENSMUSG00000051185	ENSMUST00000186780			Fam174a			protein_coding
Sox9_E11_Sample1_peak_1518	chr1	95666322	95668547	+	322	NA	exon (ENSMUST00000043336.10, exon 1 of 5)	protein_coding-exon (ENSMUST00000043336.10, exon 1 of 5)	101	ENSMUST00000189556.1	ENSMUSG00000040710	ENSMUST00000043336			St8sia4			protein_coding
Sox9_E11_Sample1_peak_1520	chr1	96805056	96806099	+	742	NA	Intergenic	Intergenic	43546	ENSMUST00000104067.1	ENSMUSG00000077255	ENSMUST00000104067			Gm26078			snoRNA
Sox9_E11_Sample1_peak_1521	chr1	96848388	96849395	+	259	NA	intron (ENSMUST00000071985.5, intron 2 of 12)	protein_coding-intron (ENSMUST00000071985.5, intron 2 of 12)	-22235	ENSMUST00000188631.4	ENSMUSG00000097814	ENSMUST00000202118			Panct2			lncRNA
Sox9_E11_Sample1_peak_1522	chr1	96871110	96872594	+	208	NA	promoter-TSS (ENSMUST00000181489.2)	lncRNA-promoter-TSS (ENSMUST00000181489.2)	319	ENSMUST00000071985.5	ENSMUSG00000040693	ENSMUST00000071985			Slco4c1			protein_coding
Sox9_E11_Sample1_peak_1523	chr1	96883695	96884397	+	48	NA	intron (ENSMUST00000188631.4, intron 3 of 3)	lncRNA-intron (ENSMUST00000188631.4, intron 3 of 3)	11813	ENSMUST00000202118.1	ENSMUSG00000097814	ENSMUST00000202118			Panct2			lncRNA
Sox9_E11_Sample1_peak_1524	chr1	97038412	97039222	+	53	NA	Intergenic	Intergenic	-13252	ENSMUST00000188810.1	ENSMUSG00000100454	ENSMUST00000188810			Gm28901			lncRNA
Sox9_E11_Sample1_peak_1526	chr1	97660567	97662439	+	463	NA	exon (ENSMUST00000153115.7, exon 1 of 3)	protein_coding-exon (ENSMUST00000153115.7, exon 1 of 3)	173	ENSMUST00000153115.7	ENSMUSG00000044768	ENSMUST00000153115			D1Ertd622e			protein_coding
Sox9_E11_Sample1_peak_1527	chr1	97698764	97699270	+	48	NA	Intergenic	Intergenic	16132	ENSMUST00000137758.1	ENSMUSG00000040648	ENSMUST00000152788			Ppip5k2			protein_coding
Sox9_E11_Sample1_peak_1528	chr1	97726881	97727782	+	46	NA	intron (ENSMUST00000042509.12, intron 22 of 27)	protein_coding-intron (ENSMUST00000042509.12, intron 22 of 27)	-6024	ENSMUST00000189992.1	ENSMUSG00000040648	ENSMUST00000152788			Ppip5k2			protein_coding
Sox9_E11_Sample1_peak_1529	chr1	97769182	97770868	+	499	NA	promoter-TSS (ENSMUST00000027571.12)	protein_coding-promoter-TSS (ENSMUST00000027571.12)	-147	ENSMUST00000112844.9	ENSMUSG00000026333	ENSMUST00000189031			Gin1			protein_coding
Sox9_E11_Sample1_peak_1530	chr1	97822181	97822527	+	47	NA	TTS (ENSMUST00000160210.1)	protein_coding-TTS (ENSMUST00000160210.1)	3631	ENSMUST00000160210.1	ENSMUSG00000026335	ENSMUST00000097625			Pam			protein_coding
Sox9_E11_Sample1_peak_1531	chr1	97916252	97916632	+	56	NA	intron (ENSMUST00000097625.9, intron 7 of 25)	protein_coding-intron (ENSMUST00000058762.14, intron 7 of 25)	-19958	ENSMUST00000158544.1	ENSMUSG00000089169	ENSMUST00000158544			Gm25413			misc_RNA
Sox9_E11_Sample1_peak_1532	chr1	97918320	97918928	+	112	NA	intron (ENSMUST00000097625.9, intron 7 of 25)	protein_coding-intron (ENSMUST00000058762.14, intron 7 of 25)	-17776	ENSMUST00000158544.1	ENSMUSG00000089169	ENSMUST00000158544			Gm25413			misc_RNA
Sox9_E11_Sample1_peak_1533	chr1	97976299	97977400	+	291	NA	intron (ENSMUST00000058762.14, intron 2 of 25)	protein_coding-intron (ENSMUST00000058762.14, intron 2 of 25)	219	ENSMUST00000159428.7	ENSMUSG00000026335	ENSMUST00000097625			Pam			protein_coding
Sox9_E11_Sample1_peak_1534	chr1	97996796	97997268	+	76	NA	intron (ENSMUST00000097625.9, intron 1 of 25)	protein_coding-intron (ENSMUST00000058762.14, intron 1 of 25)	-19777	ENSMUST00000161567.7	ENSMUSG00000026335	ENSMUST00000097625			Pam			protein_coding
Sox9_E11_Sample1_peak_1535	chr1	98047416	98048330	+	90	NA	promoter-TSS (ENSMUST00000159324.7)	lncRNA-promoter-TSS (ENSMUST00000159324.7)	-80	ENSMUST00000161661.1	ENSMUSG00000089706	ENSMUST00000161661			B230216N24Rik			lncRNA
Sox9_E11_Sample1_peak_1536	chr1	98068309	98068986	+	147	NA	intron (ENSMUST00000163007.1, intron 2 of 2)	protein_coding-intron (ENSMUST00000058762.14, intron 1 of 25)	-10764	ENSMUST00000186731.1	ENSMUSG00000026335	ENSMUST00000097625			Pam			protein_coding
Sox9_E11_Sample1_peak_1539	chr1	98094771	98096151	+	647	NA	intron (ENSMUST00000163007.1, intron 1 of 2)	protein_coding-intron (ENSMUST00000163007.1, intron 1 of 2)	160	ENSMUST00000058762.14	ENSMUSG00000026335	ENSMUST00000097625			Pam			protein_coding
Sox9_E11_Sample1_peak_1540	chr1	98139081	98139920	+	57	NA	intron (ENSMUST00000186473.1, intron 2 of 2)	lncRNA-intron (ENSMUST00000186473.1, intron 2 of 2)	8033	ENSMUST00000186473.1	ENSMUSG00000100182	ENSMUST00000186473			1810006J02Rik			lncRNA
Sox9_E11_Sample1_peak_1541	chr1	99201370	99202280	+	194	NA	Intergenic	Intergenic	184461	ENSMUST00000157179.1	ENSMUSG00000087804	ENSMUST00000157179			Gm23434			snRNA
Sox9_E11_Sample1_peak_1542	chr1	99772013	99772668	+	76	NA	promoter-TSS (ENSMUST00000086738.9)	protein_coding-promoter-TSS (ENSMUST00000086738.9)	-425	ENSMUST00000086738.9	ENSMUSG00000067028	ENSMUST00000086738			Cntnap5b			protein_coding
Sox9_E11_Sample1_peak_1543	chr1	100231134	100232037	+	290	NA	intron (ENSMUST00000086738.9, intron 11 of 23)	protein_coding-intron (ENSMUST00000086738.9, intron 11 of 23)	-21044	ENSMUST00000185484.1	ENSMUSG00000067028	ENSMUST00000086738			Cntnap5b			protein_coding
Sox9_E11_Sample1_peak_1544	chr1	100805534	100806026	+	38	NA	Intergenic	Intergenic	-56013	ENSMUST00000103851.1	ENSMUSG00000077039	ENSMUST00000103851			Gm25537			miRNA
Sox9_E11_Sample1_peak_1545	chr1	101105239	101107165	+	68	NA	Intergenic	Intergenic	-49607	ENSMUST00000187932.1	ENSMUSG00000100684	ENSMUST00000187932			Gm20268			lncRNA
Sox9_E11_Sample1_peak_1546	chr1	103231212	103231616	+	46	NA	intron (ENSMUST00000186155.1, intron 3 of 4)	unprocessed_pseudogene-intron (ENSMUST00000186155.1, intron 3 of 4)	5353	ENSMUST00000157969.1	ENSMUSG00000088594	ENSMUST00000157969			Gm23965			snoRNA
Sox9_E11_Sample1_peak_1548	chr1	104768380	104769982	+	299	NA	intron (ENSMUST00000062528.8, intron 1 of 11)	protein_coding-intron (ENSMUST00000062528.8, intron 1 of 11)	652	ENSMUST00000062528.8	ENSMUSG00000050840	ENSMUST00000062528			Cdh20			protein_coding
Sox9_E11_Sample1_peak_1549	chr1	104802948	104803746	+	26	NA	intron (ENSMUST00000062528.8, intron 1 of 11)	protein_coding-intron (ENSMUST00000062528.8, intron 1 of 11)	27233	ENSMUST00000191819.1	ENSMUSG00000103991	ENSMUST00000191819			Gm38031			TEC
Sox9_E11_Sample1_peak_1551	chr1	104932604	104933353	+	110	NA	intron (ENSMUST00000062528.8, intron 1 of 11)	protein_coding-intron (ENSMUST00000062528.8, intron 1 of 11)	-20645	ENSMUST00000159213.1	ENSMUSG00000089866	ENSMUST00000159213			Gm15699			lncRNA
Sox9_E11_Sample1_peak_1552	chr1	104944343	104945390	+	126	NA	intron (ENSMUST00000062528.8, intron 4 of 11)	protein_coding-intron (ENSMUST00000062528.8, intron 4 of 11)	-32533	ENSMUST00000159213.1	ENSMUSG00000089866	ENSMUST00000159213			Gm15699			lncRNA
Sox9_E11_Sample1_peak_1554	chr1	104986011	104986381	+	60	NA	intron (ENSMUST00000062528.8, intron 11 of 11)	protein_coding-intron (ENSMUST00000062528.8, intron 11 of 11)	-73863	ENSMUST00000159213.1	ENSMUSG00000089866	ENSMUST00000159213			Gm15699			lncRNA
Sox9_E11_Sample1_peak_1555	chr1	104993895	104994734	+	158	NA	exon (ENSMUST00000062528.8, exon 12 of 12)	protein_coding-exon (ENSMUST00000062528.8, exon 12 of 12)	-81981	ENSMUST00000159213.1	ENSMUSG00000089866	ENSMUST00000159213			Gm15699			lncRNA
Sox9_E11_Sample1_peak_1557	chr1	105092445	105092778	+	102	NA	Intergenic	Intergenic	-23843	ENSMUST00000187882.1	ENSMUSG00000099669	ENSMUST00000187882			Gm29012			lncRNA
Sox9_E11_Sample1_peak_1558	chr1	105118311	105119102	+	71	NA	intron (ENSMUST00000187882.1, intron 1 of 2)	lncRNA-intron (ENSMUST00000187882.1, intron 1 of 2)	2252	ENSMUST00000187882.1	ENSMUSG00000099669	ENSMUST00000187882			Gm29012			lncRNA
Sox9_E11_Sample1_peak_1559	chr1	105178477	105179824	+	232	NA	Intergenic	Intergenic	62696	ENSMUST00000187882.1	ENSMUSG00000099669	ENSMUST00000187882			Gm29012			lncRNA
Sox9_E11_Sample1_peak_1560	chr1	105187847	105189008	+	170	NA	Intergenic	Intergenic	-55998	ENSMUST00000187431.1	ENSMUSG00000099702	ENSMUST00000187431			Gm29013			unprocessed_pseudogene
Sox9_E11_Sample1_peak_1563	chr1	105355689	105357125	+	412	NA	promoter-TSS (ENSMUST00000186958.1)	lncRNA-promoter-TSS (ENSMUST00000186958.1)	263	ENSMUST00000058688.6	ENSMUSG00000047496	ENSMUST00000172299			Rnf152			protein_coding
Sox9_E11_Sample1_peak_1564	chr1	105663045	105664677	+	541	NA	promoter-TSS (ENSMUST00000039173.12)	protein_coding-promoter-TSS (ENSMUST00000039173.12)	0	ENSMUST00000189091.6	ENSMUSG00000026319	ENSMUST00000188588			Relch			protein_coding
Sox9_E11_Sample1_peak_1567	chr1	105780126	105781340	+	150	NA	promoter-TSS (ENSMUST00000027559.7)	protein_coding-promoter-TSS (ENSMUST00000027559.7)	15	ENSMUST00000027559.7	ENSMUSG00000026321	ENSMUST00000187812			Tnfrsf11a			protein_coding
Sox9_E11_Sample1_peak_1568	chr1	105802923	105803534	+	72	NA	intron (ENSMUST00000187812.1, intron 1 of 3)	protein_coding-intron (ENSMUST00000027559.7, intron 1 of 9)	-16642	ENSMUST00000187658.1	ENSMUSG00000026321	ENSMUST00000187812			Tnfrsf11a			protein_coding
Sox9_E11_Sample1_peak_1569	chr1	105817826	105818453	+	58	NA	intron (ENSMUST00000027559.7, intron 5 of 9)	protein_coding-intron (ENSMUST00000027559.7, intron 5 of 9)	-1731	ENSMUST00000187658.1	ENSMUSG00000026321	ENSMUST00000187812			Tnfrsf11a			protein_coding
Sox9_E11_Sample1_peak_1570	chr1	105842951	105844815	+	111	NA	intron (ENSMUST00000027559.7, intron 9 of 9)	protein_coding-intron (ENSMUST00000027559.7, intron 9 of 9)	24013	ENSMUST00000187658.1	ENSMUSG00000026321	ENSMUST00000187812			Tnfrsf11a			protein_coding
Sox9_E11_Sample1_peak_1571	chr1	105866626	105867500	+	105	NA	Intergenic	Intergenic	23949	ENSMUST00000194221.1	ENSMUSG00000102690	ENSMUST00000194221			Gm37779			TEC
Sox9_E11_Sample1_peak_1572	chr1	105879792	105881458	+	318	NA	Intergenic	Intergenic	10387	ENSMUST00000194221.1	ENSMUSG00000102690	ENSMUST00000194221			Gm37779			TEC
Sox9_E11_Sample1_peak_1573	chr1	105890834	105891334	+	51	NA	promoter-TSS (ENSMUST00000194221.1)	TEC-promoter-TSS (ENSMUST00000194221.1)	-72	ENSMUST00000194221.1	ENSMUSG00000102690	ENSMUST00000194221			Gm37779			TEC
Sox9_E11_Sample1_peak_1574	chr1	105911335	105912086	+	32	NA	Intergenic	Intergenic	-20698	ENSMUST00000194221.1	ENSMUSG00000102690	ENSMUST00000194221			Gm37779			TEC
Sox9_E11_Sample1_peak_1575	chr1	105989814	105991623	+	422	NA	promoter-TSS (ENSMUST00000119166.7)	protein_coding-promoter-TSS (ENSMUST00000119166.7)	29	ENSMUST00000119166.7	ENSMUSG00000038866	ENSMUST00000188954			Zcchc2			protein_coding
Sox9_E11_Sample1_peak_1576	chr1	106036861	106037391	+	60	NA	Intergenic	Intergenic	25382	ENSMUST00000131830.2	ENSMUSG00000038866	ENSMUST00000188954			Zcchc2			protein_coding
Sox9_E11_Sample1_peak_1577	chr1	106071225	106072293	+	120	NA	TTS (ENSMUST00000193577.1)	TEC-TTS (ENSMUST00000193577.1)	4135	ENSMUST00000193577.1	ENSMUSG00000102501	ENSMUST00000193577			Gm37372			TEC
Sox9_E11_Sample1_peak_1578	chr1	106171271	106173252	+	490	NA	promoter-TSS (ENSMUST00000190105.1)	lncRNA-promoter-TSS (ENSMUST00000190105.1)	509	ENSMUST00000061047.6	ENSMUSG00000044340	ENSMUST00000061047			Phlpp1			protein_coding
Sox9_E11_Sample1_peak_1579	chr1	106187733	106188140	+	32	NA	intron (ENSMUST00000061047.6, intron 1 of 16)	protein_coding-intron (ENSMUST00000061047.6, intron 1 of 16)	16184	ENSMUST00000061047.6	ENSMUSG00000044340	ENSMUST00000061047			Phlpp1			protein_coding
Sox9_E11_Sample1_peak_1580	chr1	106237079	106237479	+	53	NA	intron (ENSMUST00000061047.6, intron 1 of 16)	protein_coding-intron (ENSMUST00000061047.6, intron 1 of 16)	17965	ENSMUST00000194600.1	ENSMUSG00000103291	ENSMUST00000194600			Gm38235			TEC
Sox9_E11_Sample1_peak_1581	chr1	106240502	106241303	+	48	NA	intron (ENSMUST00000061047.6, intron 1 of 16)	protein_coding-intron (ENSMUST00000061047.6, intron 1 of 16)	21588	ENSMUST00000194600.1	ENSMUSG00000103291	ENSMUST00000194600			Gm38235			TEC
Sox9_E11_Sample1_peak_1582	chr1	106380128	106381053	+	138	NA	intron (ENSMUST00000061047.6, intron 14 of 16)	protein_coding-intron (ENSMUST00000061047.6, intron 14 of 16)	21397	ENSMUST00000187918.1	ENSMUSG00000100247	ENSMUST00000187918			A530053M12Rik			lncRNA
Sox9_E11_Sample1_peak_1585	chr1	106591040	106591968	+	155	NA	intron (ENSMUST00000112751.1, intron 1 of 1)	protein_coding-intron (ENSMUST00000112751.1, intron 1 of 1)	15366	ENSMUST00000192399.1	ENSMUSG00000103348	ENSMUST00000192399			Gm37053			TEC
Sox9_E11_Sample1_peak_1587	chr1	106628951	106630945	+	97	NA	intron (ENSMUST00000112751.1, intron 1 of 1)	protein_coding-intron (ENSMUST00000112751.1, intron 1 of 1)	-23078	ENSMUST00000192399.1	ENSMUSG00000103348	ENSMUST00000192399			Gm37053			TEC
Sox9_E11_Sample1_peak_1588	chr1	106713413	106714968	+	414	NA	promoter-TSS (ENSMUST00000112751.1)	protein_coding-promoter-TSS (ENSMUST00000112751.1)	84	ENSMUST00000112751.1	ENSMUSG00000057329	ENSMUST00000189999			Bcl2			protein_coding
Sox9_E11_Sample1_peak_1589	chr1	106758765	106760329	+	561	NA	exon (ENSMUST00000010049.5, exon 1 of 10)	protein_coding-exon (ENSMUST00000010049.5, exon 1 of 10)	136	ENSMUST00000187617.1	ENSMUSG00000009905	ENSMUST00000187319			Kdsr			protein_coding
Sox9_E11_Sample1_peak_1590	chr1	106795911	106796829	+	642	NA	intron (ENSMUST00000126057.1, intron 1 of 1)	protein_coding-intron (ENSMUST00000094646.5, intron 1 of 10)	207	ENSMUST00000126057.1	ENSMUSG00000009907	ENSMUST00000126057			Vps4b			protein_coding
Sox9_E11_Sample1_peak_1592	chr1	107350806	107351208	+	89	NA	Intergenic	Intergenic	-10191	ENSMUST00000191425.6	ENSMUSG00000026327	ENSMUST00000027566			Serpinb11			protein_coding
Sox9_E11_Sample1_peak_1593	chr1	107414141	107415049	+	102	NA	intron (ENSMUST00000154538.7, intron 1 of 3)	protein_coding-intron (ENSMUST00000154538.7, intron 1 of 3)	-8094	ENSMUST00000086690.5	ENSMUSG00000067001	ENSMUST00000086690			Serpinb7			protein_coding
Sox9_E11_Sample1_peak_1594	chr1	107481232	107481985	+	152	NA	Intergenic	Intergenic	-29815	ENSMUST00000009356.10	ENSMUSG00000062345	ENSMUST00000143832			Serpinb2			protein_coding
Sox9_E11_Sample1_peak_1595	chr1	107589926	107590927	+	195	NA	intron (ENSMUST00000000514.10, intron 1 of 6)	protein_coding-intron (ENSMUST00000000514.10, intron 1 of 6)	380	ENSMUST00000151283.1	ENSMUSG00000026315	ENSMUST00000112706			Serpinb8			protein_coding
Sox9_E11_Sample1_peak_1596	chr1	107607898	107608296	+	60	NA	TTS (ENSMUST00000123086.1)	protein_coding-TTS (ENSMUST00000123086.1)	2217	ENSMUST00000123086.1	ENSMUSG00000026315	ENSMUST00000112706			Serpinb8			protein_coding
Sox9_E11_Sample1_peak_1599	chr1	107748427	107749158	+	115	NA	Intergenic	Intergenic	7916	ENSMUST00000179841.1	ENSMUSG00000096241	ENSMUST00000179841			Gm24267			snRNA
Sox9_E11_Sample1_peak_1600	chr1	107774876	107775482	+	93	NA	Intergenic	Intergenic	-18471	ENSMUST00000179841.1	ENSMUSG00000096241	ENSMUST00000179841			Gm24267			snRNA
Sox9_E11_Sample1_peak_1602	chr1	107915031	107915617	+	38	NA	Intergenic	Intergenic	-1935	ENSMUST00000189845.6	ENSMUSG00000100457	ENSMUST00000189845			D830032E09Rik			lncRNA
Sox9_E11_Sample1_peak_1603	chr1	107941699	107942649	+	152	NA	intron (ENSMUST00000186875.6, intron 4 of 4)	lncRNA-intron (ENSMUST00000186875.6, intron 4 of 4)	5465	ENSMUST00000189497.1	ENSMUSG00000100457	ENSMUST00000189845			D830032E09Rik			lncRNA
Sox9_E11_Sample1_peak_1604	chr1	108094530	108095505	+	263	NA	Intergenic	Intergenic	-131710	ENSMUST00000186072.1	ENSMUSG00000099484	ENSMUST00000186072			Gm28282			processed_pseudogene
Sox9_E11_Sample1_peak_1605	chr1	108110608	108111637	+	192	NA	Intergenic	Intergenic	-147815	ENSMUST00000186072.1	ENSMUSG00000099484	ENSMUST00000186072			Gm28282			processed_pseudogene
Sox9_E11_Sample1_peak_1606	chr1	108182146	108183395	+	63	NA	Intergenic	Intergenic	196668	ENSMUST00000185629.1	ENSMUSG00000100041	ENSMUST00000185629			Gm5702			processed_pseudogene
Sox9_E11_Sample1_peak_1607	chr1	108670829	108671469	+	39	NA	Intergenic	Intergenic	-58635	ENSMUST00000185509.1	ENSMUSG00000101231	ENSMUST00000185509			Gm28283			processed_pseudogene
Sox9_E11_Sample1_peak_1608	chr1	109972223	109972846	+	46	NA	Intergenic	Intergenic	-9897	ENSMUST00000137092.7	ENSMUSG00000026312	ENSMUST00000145188			Cdh7			protein_coding
Sox9_E11_Sample1_peak_1609	chr1	109982065	109983512	+	356	NA	promoter-TSS (ENSMUST00000112701.7)	protein_coding-promoter-TSS (ENSMUST00000112701.7)	78	ENSMUST00000112701.7	ENSMUSG00000026312	ENSMUST00000145188			Cdh7			protein_coding
Sox9_E11_Sample1_peak_1610	chr1	110195077	110195751	+	46	NA	Intergenic	Intergenic	96119	ENSMUST00000134301.1	ENSMUSG00000026312	ENSMUST00000145188			Cdh7			protein_coding
Sox9_E11_Sample1_peak_1611	chr1	110590212	110591294	+	61	NA	Intergenic	Intergenic	-9268	ENSMUST00000189583.1	ENSMUSG00000099926	ENSMUST00000189583			Gm6693			processed_pseudogene
Sox9_E11_Sample1_peak_1612	chr1	111754138	111754755	+	95	NA	Intergenic	Intergenic	53329	ENSMUST00000186797.1	ENSMUSG00000100555	ENSMUST00000186797			Gm8173			processed_pseudogene
Sox9_E11_Sample1_peak_1613	chr1	111864116	111865351	+	752	NA	promoter-TSS (ENSMUST00000186365.1)	protein_coding-promoter-TSS (ENSMUST00000186365.1)	35	ENSMUST00000186365.1	ENSMUSG00000038702	ENSMUST00000189370			Dsel			protein_coding
Sox9_E11_Sample1_peak_1614	chr1	112378366	112378923	+	83	NA	Intergenic	Intergenic	26211	ENSMUST00000185872.1	ENSMUSG00000101054	ENSMUST00000185872			Gm18406			processed_pseudogene
Sox9_E11_Sample1_peak_1615	chr1	112384129	112384629	+	125	NA	Intergenic	Intergenic	20476	ENSMUST00000185872.1	ENSMUSG00000101054	ENSMUST00000185872			Gm18406			processed_pseudogene
Sox9_E11_Sample1_peak_1616	chr1	112416214	112417327	+	268	NA	Intergenic	Intergenic	-11915	ENSMUST00000185872.1	ENSMUSG00000101054	ENSMUST00000185872			Gm18406			processed_pseudogene
Sox9_E11_Sample1_peak_1617	chr1	112451901	112452534	+	28	NA	Intergenic	Intergenic	-15694	ENSMUST00000158066.1	ENSMUSG00000088691	ENSMUST00000158066			Gm22331			snoRNA
Sox9_E11_Sample1_peak_1618	chr1	114836025	114836456	+	53	NA	Intergenic	Intergenic	383523	ENSMUST00000185902.1	ENSMUSG00000101687	ENSMUST00000185902			Gm4854			processed_pseudogene
Sox9_E11_Sample1_peak_1619	chr1	114855947	114857050	+	169	NA	Intergenic	Intergenic	363265	ENSMUST00000185902.1	ENSMUSG00000101687	ENSMUST00000185902			Gm4854			processed_pseudogene
Sox9_E11_Sample1_peak_1620	chr1	115516681	115517213	+	53	NA	Intergenic	Intergenic	153642	ENSMUST00000187634.1	ENSMUSG00000100515	ENSMUST00000189918			Gm17916			transcribed_processed_pseudogene
Sox9_E11_Sample1_peak_1622	chr1	115684306	115685184	+	141	NA	promoter-TSS (ENSMUST00000043725.8)	protein_coding-promoter-TSS (ENSMUST00000043725.8)	-11	ENSMUST00000043725.8	ENSMUSG00000070695	ENSMUST00000043725			Cntnap5a			protein_coding
Sox9_E11_Sample1_peak_1623	chr1	115918021	115919064	+	281	NA	intron (ENSMUST00000043725.8, intron 3 of 23)	protein_coding-intron (ENSMUST00000043725.8, intron 3 of 23)	233786	ENSMUST00000043725.8	ENSMUSG00000070695	ENSMUST00000043725			Cntnap5a			protein_coding
Sox9_E11_Sample1_peak_1624	chr1	115931014	115932005	+	69	NA	intron (ENSMUST00000043725.8, intron 3 of 23)	protein_coding-intron (ENSMUST00000043725.8, intron 3 of 23)	246753	ENSMUST00000043725.8	ENSMUSG00000070695	ENSMUST00000043725			Cntnap5a			protein_coding
Sox9_E11_Sample1_peak_1625	chr1	116099148	116100203	+	281	NA	intron (ENSMUST00000043725.8, intron 5 of 23)	protein_coding-intron (ENSMUST00000043725.8, intron 5 of 23)	294738	ENSMUST00000175207.1	ENSMUSG00000092948	ENSMUST00000175207			Gm23393			miRNA
Sox9_E11_Sample1_peak_1626	chr1	116285697	116286294	+	108	NA	intron (ENSMUST00000043725.8, intron 12 of 23)	protein_coding-intron (ENSMUST00000043725.8, intron 12 of 23)	108418	ENSMUST00000175207.1	ENSMUSG00000092948	ENSMUST00000175207			Gm23393			miRNA
Sox9_E11_Sample1_peak_1627	chr1	116324226	116325013	+	57	NA	intron (ENSMUST00000043725.8, intron 13 of 23)	protein_coding-intron (ENSMUST00000043725.8, intron 13 of 23)	69794	ENSMUST00000175207.1	ENSMUSG00000092948	ENSMUST00000175207			Gm23393			miRNA
Sox9_E11_Sample1_peak_1629	chr1	117254010	117254597	+	26	NA	Intergenic	Intergenic	139229	ENSMUST00000189740.1	ENSMUSG00000101154	ENSMUST00000189740			Gm17777			processed_pseudogene
Sox9_E11_Sample1_peak_1630	chr1	118310628	118311753	+	368	NA	promoter-TSS (ENSMUST00000186608.6)	protein_coding-promoter-TSS (ENSMUST00000186608.6)	46	ENSMUST00000188882.1	ENSMUSG00000026374	ENSMUST00000186163			Tsn			protein_coding
Sox9_E11_Sample1_peak_1631	chr1	118321130	118322563	+	366	NA	promoter-TSS (ENSMUST00000027626.12)	protein_coding-promoter-TSS (ENSMUST00000027626.12)	7	ENSMUST00000027626.12	ENSMUSG00000026377	ENSMUST00000161495			Nifk			protein_coding
Sox9_E11_Sample1_peak_1632	chr1	118388257	118390265	+	537	NA	promoter-TSS (ENSMUST00000165223.7)	protein_coding-promoter-TSS (ENSMUST00000165223.7)	-83	ENSMUST00000189676.6	ENSMUSG00000064302	ENSMUST00000203870			Clasp1			protein_coding
Sox9_E11_Sample1_peak_1633	chr1	118398033	118399262	+	177	NA	intron (ENSMUST00000049404.12, intron 1 of 39)	protein_coding-intron (ENSMUST00000049404.12, intron 1 of 39)	9130	ENSMUST00000189262.6	ENSMUSG00000064302	ENSMUST00000203870			Clasp1			protein_coding
Sox9_E11_Sample1_peak_1634	chr1	118458796	118459897	+	557	NA	promoter-TSS (ENSMUST00000116892.1)	snRNA-promoter-TSS (ENSMUST00000116892.1)	-79	ENSMUST00000203191.1	ENSMUSG00000107722	ENSMUST00000204125			2900060B14Rik			lncRNA
Sox9_E11_Sample1_peak_1635	chr1	118480689	118482659	+	270	NA	promoter-TSS (ENSMUST00000191823.5)	protein_coding-promoter-TSS (ENSMUST00000191823.5)	-365	ENSMUST00000191823.5	ENSMUSG00000064302	ENSMUST00000203870			Clasp1			protein_coding
Sox9_E11_Sample1_peak_1636	chr1	118627563	118628594	+	242	NA	exon (ENSMUST00000027629.9, exon 1 of 15)	protein_coding-exon (ENSMUST00000027629.9, exon 1 of 15)	132	ENSMUST00000027629.9	ENSMUSG00000026380	ENSMUST00000027629			Tfcp2l1			protein_coding
Sox9_E11_Sample1_peak_1638	chr1	118650007	118650579	+	47	NA	intron (ENSMUST00000027629.9, intron 2 of 14)	protein_coding-intron (ENSMUST00000027629.9, intron 2 of 14)	1502	ENSMUST00000185504.1	ENSMUSG00000101624	ENSMUST00000185504			Gm28882			processed_pseudogene
Sox9_E11_Sample1_peak_1639	chr1	118661136	118661517	+	85	NA	intron (ENSMUST00000027629.9, intron 7 of 14)	protein_coding-intron (ENSMUST00000027629.9, intron 7 of 14)	-9531	ENSMUST00000185504.1	ENSMUSG00000101624	ENSMUST00000185504			Gm28882			processed_pseudogene
Sox9_E11_Sample1_peak_1640	chr1	118671873	118672427	+	76	NA	intron (ENSMUST00000027629.9, intron 13 of 14)	protein_coding-intron (ENSMUST00000027629.9, intron 13 of 14)	-9671	ENSMUST00000157738.1	ENSMUSG00000088363	ENSMUST00000157738			Gm23497			snRNA
Sox9_E11_Sample1_peak_1641	chr1	118689909	118690462	+	53	NA	Intergenic	Intergenic	8364	ENSMUST00000157738.1	ENSMUSG00000088363	ENSMUST00000157738			Gm23497			snRNA
Sox9_E11_Sample1_peak_1643	chr1	118840224	118840669	+	46	NA	exon (ENSMUST00000062483.14, exon 13 of 14)	protein_coding-exon (ENSMUST00000062483.14, exon 13 of 14)	30310	ENSMUST00000190981.1	ENSMUSG00000100040	ENSMUST00000190981			Gm28467			processed_pseudogene
Sox9_E11_Sample1_peak_1644	chr1	118878214	118879205	+	76	NA	intron (ENSMUST00000160991.7, intron 2 of 7)	protein_coding-intron (ENSMUST00000062483.14, intron 3 of 13)	68573	ENSMUST00000190981.1	ENSMUSG00000100040	ENSMUST00000190981			Gm28467			processed_pseudogene
Sox9_E11_Sample1_peak_1645	chr1	118913489	118914337	+	602	NA	intron (ENSMUST00000159839.7, intron 2 of 6)	protein_coding-intron (ENSMUST00000062483.14, intron 2 of 13)	-40307	ENSMUST00000183982.1	ENSMUSG00000098273	ENSMUST00000183982			Mir6346			miRNA
Sox9_E11_Sample1_peak_1646	chr1	118982080	118982923	+	68	NA	promoter-TSS (ENSMUST00000159678.2)	protein_coding-promoter-TSS (ENSMUST00000159678.2)	87	ENSMUST00000159678.2	ENSMUSG00000048402	ENSMUST00000161451			Gli2			protein_coding
Sox9_E11_Sample1_peak_1647	chr1	119047414	119048152	+	60	NA	intron (ENSMUST00000161301.7, intron 1 of 9)	protein_coding-intron (ENSMUST00000062483.14, intron 1 of 13)	5556	ENSMUST00000162552.7	ENSMUSG00000048402	ENSMUST00000161451			Gli2			protein_coding
Sox9_E11_Sample1_peak_1649	chr1	119053477	119054324	+	95	NA	promoter-TSS (ENSMUST00000062483.14)	protein_coding-promoter-TSS (ENSMUST00000062483.14)	-281	ENSMUST00000062483.14	ENSMUSG00000048402	ENSMUST00000161451			Gli2			protein_coding
Sox9_E11_Sample1_peak_1650	chr1	119077466	119077605	+	20	NA	Intergenic	Intergenic	19066	ENSMUST00000181458.1	ENSMUSG00000097408	ENSMUST00000181458			Gm26831			lncRNA
Sox9_E11_Sample1_peak_1651	chr1	119083332	119083824	+	46	NA	Intergenic	Intergenic	25109	ENSMUST00000181458.1	ENSMUSG00000097408	ENSMUST00000181458			Gm26831			lncRNA
Sox9_E11_Sample1_peak_1652	chr1	119189517	119190052	+	73	NA	Intergenic	Intergenic	32198	ENSMUST00000181691.1	ENSMUSG00000096939	ENSMUST00000181691			Gm8321			processed_pseudogene
Sox9_E11_Sample1_peak_1653	chr1	119196654	119197598	+	97	NA	Intergenic	Intergenic	39540	ENSMUST00000181691.1	ENSMUSG00000096939	ENSMUST00000181691			Gm8321			processed_pseudogene
Sox9_E11_Sample1_peak_1654	chr1	119217325	119217800	+	54	NA	Intergenic	Intergenic	25191	ENSMUST00000186012.1	ENSMUSG00000100767	ENSMUST00000186012			Gm3508			processed_pseudogene
Sox9_E11_Sample1_peak_1656	chr1	119278605	119279439	+	51	NA	Intergenic	Intergenic	-36269	ENSMUST00000186012.1	ENSMUSG00000100767	ENSMUST00000186012			Gm3508			processed_pseudogene
Sox9_E11_Sample1_peak_1657	chr1	119289984	119290779	+	226	NA	Intergenic	Intergenic	36452	ENSMUST00000189894.1	ENSMUSG00000099860	ENSMUST00000189894			Gm29456			lncRNA
Sox9_E11_Sample1_peak_1658	chr1	119304173	119306228	+	178	NA	TTS (ENSMUST00000189894.1)	lncRNA-TTS (ENSMUST00000189894.1)	21633	ENSMUST00000189894.1	ENSMUSG00000099860	ENSMUST00000189894			Gm29456			lncRNA
Sox9_E11_Sample1_peak_1659	chr1	119328668	119329752	+	147	NA	promoter-TSS (ENSMUST00000186504.1)	lncRNA-promoter-TSS (ENSMUST00000186504.1)	10	ENSMUST00000186697.1	ENSMUSG00000101179	ENSMUST00000186697			Gm29455			lncRNA
Sox9_E11_Sample1_peak_1661	chr1	119420930	119422414	+	183	NA	exon (ENSMUST00000038765.5, exon 1 of 2)	protein_coding-exon (ENSMUST00000038765.5, exon 1 of 2)	576	ENSMUST00000038765.5	ENSMUSG00000037035	ENSMUST00000038765			Inhbb			protein_coding
Sox9_E11_Sample1_peak_1663	chr1	119504232	119505325	+	268	NA	promoter-TSS (ENSMUST00000004565.14)	protein_coding-promoter-TSS (ENSMUST00000004565.14)	16	ENSMUST00000004565.14	ENSMUSG00000004451	ENSMUST00000004565			Ralb			protein_coding
Sox9_E11_Sample1_peak_1664	chr1	119525626	119526614	+	355	NA	promoter-TSS (ENSMUST00000183607.1)	protein_coding-promoter-TSS (ENSMUST00000183607.1)	-40	ENSMUST00000183952.1	ENSMUSG00000098923	ENSMUST00000183952			Tmem185b			protein_coding
Sox9_E11_Sample1_peak_1665	chr1	119541208	119542001	+	88	NA	Intergenic	Intergenic	-5439	ENSMUST00000188909.1	ENSMUSG00000101731	ENSMUST00000186206			3830432H09Rik			lncRNA
Sox9_E11_Sample1_peak_1666	chr1	119626679	119627490	+	60	NA	intron (ENSMUST00000027632.13, intron 3 of 16)	protein_coding-intron (ENSMUST00000027632.13, intron 3 of 16)	4585	ENSMUST00000192036.1	ENSMUSG00000102687	ENSMUST00000192036			Gm37219			TEC
Sox9_E11_Sample1_peak_1667	chr1	119648390	119650109	+	431	NA	promoter-TSS (ENSMUST00000027632.13)	protein_coding-promoter-TSS (ENSMUST00000027632.13)	-249	ENSMUST00000191046.6	ENSMUSG00000026383	ENSMUST00000189042			Epb41l5			protein_coding
Sox9_E11_Sample1_peak_1669	chr1	119836545	119838003	+	578	NA	promoter-TSS (ENSMUST00000163435.7)	protein_coding-promoter-TSS (ENSMUST00000163435.7)	73	ENSMUST00000163435.7	ENSMUSG00000026384	ENSMUST00000166422			Ptpn4			protein_coding
Sox9_E11_Sample1_peak_1670	chr1	119906984	119907482	+	26	NA	TTS (ENSMUST00000037906.5)	protein_coding-TTS (ENSMUST00000037906.5)	4103	ENSMUST00000187956.1	ENSMUSG00000101224	ENSMUST00000187956			Gm28209			lncRNA
Sox9_E11_Sample1_peak_1671	chr1	119912981	119913638	+	223	NA	promoter-TSS (ENSMUST00000037906.5)	protein_coding-promoter-TSS (ENSMUST00000037906.5)	-101	ENSMUST00000037906.5	ENSMUSG00000036975	ENSMUST00000037906			Tmem177			protein_coding
Sox9_E11_Sample1_peak_1672	chr1	119957280	119958016	+	26	NA	intron (ENSMUST00000037840.11, intron 6 of 22)	protein_coding-intron (ENSMUST00000037840.11, intron 6 of 22)	-29147	ENSMUST00000174509.1	ENSMUSG00000092245	ENSMUST00000174509			Gm17973			processed_pseudogene
Sox9_E11_Sample1_peak_1673	chr1	119965607	119966331	+	202	NA	intron (ENSMUST00000174458.1, intron 6 of 6)	protein_coding-intron (ENSMUST00000037840.11, intron 5 of 22)	-20826	ENSMUST00000174509.1	ENSMUSG00000092245	ENSMUST00000174509			Gm17973			processed_pseudogene
Sox9_E11_Sample1_peak_1674	chr1	119997009	119997917	+	363	NA	promoter-TSS (ENSMUST00000174370.7)	protein_coding-promoter-TSS (ENSMUST00000174370.7)	-229	ENSMUST00000174458.1	ENSMUSG00000036962	ENSMUST00000037840			Cfap221			protein_coding
Sox9_E11_Sample1_peak_1675	chr1	120006981	120007933	+	182	NA	intron (ENSMUST00000189037.1, intron 1 of 12)	protein_coding-intron (ENSMUST00000072886.10, intron 1 of 13)	423	ENSMUST00000189037.1	ENSMUSG00000026387	ENSMUST00000189037			Sctr			protein_coding
Sox9_E11_Sample1_peak_1676	chr1	120012782	120013271	+	46	NA	intron (ENSMUST00000189037.1, intron 1 of 12)	protein_coding-intron (ENSMUST00000072886.10, intron 1 of 13)	5992	ENSMUST00000189037.1	ENSMUSG00000026387	ENSMUST00000189037			Sctr			protein_coding
Sox9_E11_Sample1_peak_1677	chr1	120024553	120025253	+	128	NA	intron (ENSMUST00000072886.10, intron 3 of 13)	protein_coding-intron (ENSMUST00000072886.10, intron 3 of 13)	17869	ENSMUST00000189037.1	ENSMUSG00000026387	ENSMUST00000189037			Sctr			protein_coding
Sox9_E11_Sample1_peak_1678	chr1	120032901	120033342	+	68	NA	intron (ENSMUST00000189037.1, intron 3 of 12)	protein_coding-intron (ENSMUST00000072886.10, intron 4 of 13)	26087	ENSMUST00000189037.1	ENSMUSG00000026387	ENSMUST00000189037			Sctr			protein_coding
Sox9_E11_Sample1_peak_1679	chr1	120073015	120074463	+	265	NA	exon (ENSMUST00000056089.7, exon 1 of 2)	protein_coding-exon (ENSMUST00000056089.7, exon 1 of 2)	335	ENSMUST00000056089.7	ENSMUSG00000050777	ENSMUST00000056089			Tmem37			protein_coding
Sox9_E11_Sample1_peak_1681	chr1	120120182	120121752	+	454	NA	promoter-TSS (ENSMUST00000027637.12)	protein_coding-promoter-TSS (ENSMUST00000027637.12)	-30	ENSMUST00000151708.2	ENSMUSG00000026385	ENSMUST00000112648			Dbi			protein_coding
Sox9_E11_Sample1_peak_1683	chr1	120171563	120172034	+	284	NA	intron (ENSMUST00000112644.8, intron 5 of 5)	protein_coding-intron (ENSMUST00000027637.12, intron 4 of 4)	11318	ENSMUST00000128578.1	ENSMUSG00000026388	ENSMUST00000027637			3110009E18Rik			protein_coding
Sox9_E11_Sample1_peak_1685	chr1	120195684	120196046	+	100	NA	intron (ENSMUST00000140490.7, intron 4 of 4)	protein_coding-intron (ENSMUST00000140490.7, intron 4 of 4)	35385	ENSMUST00000128578.1	ENSMUSG00000026388	ENSMUST00000027637			3110009E18Rik			protein_coding
Sox9_E11_Sample1_peak_1686	chr1	120264818	120265652	+	360	NA	promoter-TSS (ENSMUST00000112640.7)	protein_coding-promoter-TSS (ENSMUST00000112640.7)	20	ENSMUST00000140490.7	ENSMUSG00000026389	ENSMUST00000112643			Steap3			protein_coding
Sox9_E11_Sample1_peak_1688	chr1	120340512	120342867	+	87	NA	exon (ENSMUST00000037286.9, exon 1 of 2)	protein_coding-exon (ENSMUST00000037286.9, exon 1 of 2)	1107	ENSMUST00000037286.9	ENSMUSG00000036907	ENSMUST00000037286			C1ql2			protein_coding
Sox9_E11_Sample1_peak_1689	chr1	120357055	120358207	+	437	NA	Intergenic	Intergenic	17049	ENSMUST00000037286.9	ENSMUSG00000036907	ENSMUST00000037286			C1ql2			protein_coding
Sox9_E11_Sample1_peak_1691	chr1	120480820	120481288	+	76	NA	intron (ENSMUST00000027639.7, intron 12 of 16)	protein_coding-intron (ENSMUST00000027639.7, intron 12 of 16)	23702	ENSMUST00000186432.2	ENSMUSG00000026390	ENSMUST00000027639			Marco			protein_coding
Sox9_E11_Sample1_peak_1692	chr1	120549452	120550404	+	39	NA	Intergenic	Intergenic	-44904	ENSMUST00000027639.7	ENSMUSG00000026390	ENSMUST00000027639			Marco			protein_coding
Sox9_E11_Sample1_peak_1694	chr1	120602835	120603952	+	82	NA	exon (ENSMUST00000079721.8, exon 1 of 2)	protein_coding-exon (ENSMUST00000079721.8, exon 1 of 2)	975	ENSMUST00000079721.8	ENSMUSG00000058665	ENSMUST00000079721			En1			protein_coding
Sox9_E11_Sample1_peak_1695	chr1	120614264	120614497	+	32	NA	Intergenic	Intergenic	-7360	ENSMUST00000186982.2	ENSMUSG00000099957	ENSMUST00000186982			2610027F03Rik			lncRNA
Sox9_E11_Sample1_peak_1696	chr1	120643077	120644004	+	71	NA	intron (ENSMUST00000186982.2, intron 1 of 6)	lncRNA-intron (ENSMUST00000186982.2, intron 1 of 6)	21800	ENSMUST00000186982.2	ENSMUSG00000099957	ENSMUST00000186982			2610027F03Rik			lncRNA
Sox9_E11_Sample1_peak_1698	chr1	120801646	120802169	+	43	NA	Intergenic	Intergenic	-14593	ENSMUST00000189213.1	ENSMUSG00000101922	ENSMUST00000189213			Gm29345			lncRNA
Sox9_E11_Sample1_peak_1699	chr1	120814483	120814960	+	26	NA	Intergenic	Intergenic	-1779	ENSMUST00000189213.1	ENSMUSG00000101922	ENSMUST00000189213			Gm29345			lncRNA
Sox9_E11_Sample1_peak_1701	chr1	120962084	120962519	+	31	NA	Intergenic	Intergenic	93305	ENSMUST00000194609.1	ENSMUSG00000102360	ENSMUST00000194609			Gm37043			TEC
Sox9_E11_Sample1_peak_1702	chr1	121096688	121097410	+	90	NA	intron (ENSMUST00000185678.1, intron 1 of 2)	lncRNA-intron (ENSMUST00000181433.7, intron 1 of 4)	9520	ENSMUST00000181183.2	ENSMUSG00000097881	ENSMUST00000181183			Celrr			lncRNA
Sox9_E11_Sample1_peak_1703	chr1	121177778	121178892	+	97	NA	exon (ENSMUST00000185678.1, exon 3 of 3)	lncRNA-exon (ENSMUST00000185678.1, exon 3 of 3)	-45941	ENSMUST00000191007.1	ENSMUSG00000101700	ENSMUST00000191007			Gm29359			lncRNA
Sox9_E11_Sample1_peak_1704	chr1	121203096	121204142	+	39	NA	Intergenic	Intergenic	-20657	ENSMUST00000191007.1	ENSMUSG00000101700	ENSMUST00000191007			Gm29359			lncRNA
Sox9_E11_Sample1_peak_1706	chr1	121327158	121328396	+	648	NA	promoter-TSS (ENSMUST00000159085.7)	protein_coding-promoter-TSS (ENSMUST00000159085.7)	-12	ENSMUST00000162582.1	ENSMUSG00000003721	ENSMUST00000161818			Insig2			protein_coding
Sox9_E11_Sample1_peak_1707	chr1	121343727	121344293	+	138	NA	Intergenic	Intergenic	-11421	ENSMUST00000071064.12	ENSMUSG00000003721	ENSMUST00000161818			Insig2			protein_coding
Sox9_E11_Sample1_peak_1708	chr1	121430778	121432009	+	431	NA	intron (ENSMUST00000156459.7, intron 1 of 5)	protein_coding-intron (ENSMUST00000036025.15, intron 1 of 23)	283	ENSMUST00000112621.1	ENSMUSG00000026339	ENSMUST00000112621			Ccdc93			protein_coding
Sox9_E11_Sample1_peak_1709	chr1	121527284	121528834	+	347	NA	exon (ENSMUST00000055884.7, exon 1 of 2)	protein_coding-exon (ENSMUST00000055884.7, exon 1 of 2)	406	ENSMUST00000055884.7	ENSMUSG00000050534	ENSMUST00000055884			Htr5b			protein_coding
Sox9_E11_Sample1_peak_1710	chr1	121567175	121568321	+	563	NA	promoter-TSS (ENSMUST00000131471.1)	protein_coding-promoter-TSS (ENSMUST00000131471.1)	-26	ENSMUST00000131471.1	ENSMUSG00000001674	ENSMUST00000131471			Ddx18			protein_coding
Sox9_E11_Sample1_peak_1711	chr1	121771517	121771696	+	20	NA	Intergenic	Intergenic	65091	ENSMUST00000192952.1	ENSMUSG00000102488	ENSMUST00000192952			Gm37920			TEC
Sox9_E11_Sample1_peak_1712	chr1	122109707	122110301	+	122	NA	Intergenic	Intergenic	-80217	ENSMUST00000185647.1	ENSMUSG00000100913	ENSMUST00000185647			Gm8392			processed_pseudogene
Sox9_E11_Sample1_peak_1713	chr1	122940148	122940600	+	46	NA	Intergenic	Intergenic	74332	ENSMUST00000193865.1	ENSMUSG00000104180	ENSMUST00000193865			Gm37970			TEC
Sox9_E11_Sample1_peak_1714	chr1	123068548	123069535	+	43	NA	Intergenic	Intergenic	80176	ENSMUST00000189712.1	ENSMUSG00000100762	ENSMUST00000189712			Gm8403			processed_pseudogene
Sox9_E11_Sample1_peak_1716	chr1	123193406	123194339	+	71	NA	Intergenic	Intergenic	-11277	ENSMUST00000188837.1	ENSMUSG00000100405	ENSMUST00000188837			Gm28911			processed_pseudogene
Sox9_E11_Sample1_peak_1717	chr1	123303743	123304349	+	93	NA	Intergenic	Intergenic	16472	ENSMUST00000189001.1	ENSMUSG00000101495	ENSMUST00000189001			Gm28912			processed_pseudogene
Sox9_E11_Sample1_peak_1719	chr1	123917177	123917744	+	17	NA	intron (ENSMUST00000239072.1, intron 1 of 25)	protein_coding-intron (ENSMUST00000112603.3, intron 1 of 25)	-87301	ENSMUST00000195556.1	ENSMUSG00000102940	ENSMUST00000195556			Gm37551			TEC
Sox9_E11_Sample1_peak_1720	chr1	124045002	124046397	+	308	NA	promoter-TSS (ENSMUST00000112603.3)	protein_coding-promoter-TSS (ENSMUST00000112603.3)	-140	ENSMUST00000112606.7	ENSMUSG00000036815	ENSMUST00000112606			Dpp10			protein_coding
Sox9_E11_Sample1_peak_1721	chr1	124517792	124518356	+	60	NA	intron (ENSMUST00000187286.1, intron 1 of 2)	protein_coding-intron (ENSMUST00000187286.1, intron 1 of 2)	27218	ENSMUST00000083406.1	ENSMUSG00000065340	ENSMUST00000083406			Gm25578			snRNA
Sox9_E11_Sample1_peak_1723	chr1	125223145	125223903	+	67	NA	Intergenic	Intergenic	-26069	ENSMUST00000187796.1	ENSMUSG00000099574	ENSMUST00000187796			1700121L03Rik			lncRNA
Sox9_E11_Sample1_peak_1725	chr1	125339208	125339663	+	87	NA	Intergenic	Intergenic	58177	ENSMUST00000186008.6	ENSMUSG00000026341	ENSMUST00000188497			Actr3			protein_coding
Sox9_E11_Sample1_peak_1726	chr1	125370728	125371538	+	155	NA	Intergenic	Intergenic	26479	ENSMUST00000186008.6	ENSMUSG00000026341	ENSMUST00000188497			Actr3			protein_coding
Sox9_E11_Sample1_peak_1728	chr1	125434894	125436051	+	416	NA	promoter-TSS (ENSMUST00000178474.7)	protein_coding-promoter-TSS (ENSMUST00000178474.7)	-2	ENSMUST00000185280.1	ENSMUSG00000026341	ENSMUST00000188497			Actr3			protein_coding
Sox9_E11_Sample1_peak_1729	chr1	125476296	125476542	+	24	NA	Intergenic	Intergenic	31852	ENSMUST00000186830.1	ENSMUSG00000102063	ENSMUST00000186830			Gm28706			lncRNA
Sox9_E11_Sample1_peak_1730	chr1	125481832	125482992	+	156	NA	Intergenic	Intergenic	37845	ENSMUST00000186830.1	ENSMUSG00000102063	ENSMUST00000186830			Gm28706			lncRNA
Sox9_E11_Sample1_peak_1731	chr1	125489306	125489852	+	111	NA	Intergenic	Intergenic	45012	ENSMUST00000186830.1	ENSMUSG00000102063	ENSMUST00000186830			Gm28706			lncRNA
Sox9_E11_Sample1_peak_1732	chr1	125508375	125509167	+	35	NA	Intergenic	Intergenic	-51824	ENSMUST00000190037.6	ENSMUSG00000026342	ENSMUST00000027580			Slc35f5			protein_coding
Sox9_E11_Sample1_peak_1733	chr1	125533081	125533688	+	140	NA	Intergenic	Intergenic	-27211	ENSMUST00000190037.6	ENSMUSG00000026342	ENSMUST00000027580			Slc35f5			protein_coding
Sox9_E11_Sample1_peak_1734	chr1	125549819	125551717	+	131	NA	Intergenic	Intergenic	-9827	ENSMUST00000190037.6	ENSMUSG00000026342	ENSMUST00000027580			Slc35f5			protein_coding
Sox9_E11_Sample1_peak_1735	chr1	125560253	125561494	+	903	NA	promoter-TSS (ENSMUST00000027580.10)	protein_coding-promoter-TSS (ENSMUST00000027580.10)	-143	ENSMUST00000027580.10	ENSMUSG00000026342	ENSMUST00000027580			Slc35f5			protein_coding
Sox9_E11_Sample1_peak_1736	chr1	125607153	125607885	+	129	NA	Intergenic	Intergenic	23006	ENSMUST00000189443.1	ENSMUSG00000026342	ENSMUST00000027580			Slc35f5			protein_coding
Sox9_E11_Sample1_peak_1737	chr1	125668598	125669397	+	85	NA	promoter-TSS (ENSMUST00000191239.1)	processed_pseudogene-promoter-TSS (ENSMUST00000191239.1)	-381	ENSMUST00000191239.1	ENSMUSG00000101015	ENSMUST00000191239			Gm18444			processed_pseudogene
Sox9_E11_Sample1_peak_1738	chr1	125676386	125677606	+	354	NA	promoter-TSS (ENSMUST00000027581.6)	protein_coding-promoter-TSS (ENSMUST00000027581.6)	1	ENSMUST00000027581.6	ENSMUSG00000026343	ENSMUST00000159359			Gpr39			protein_coding
Sox9_E11_Sample1_peak_1739	chr1	125687565	125688328	+	89	NA	intron (ENSMUST00000027581.6, intron 1 of 1)	protein_coding-intron (ENSMUST00000027581.6, intron 1 of 1)	10951	ENSMUST00000027581.6	ENSMUSG00000026343	ENSMUST00000159359			Gpr39			protein_coding
Sox9_E11_Sample1_peak_1741	chr1	125910716	125913080	+	255	NA	promoter-TSS (ENSMUST00000159529.1)	protein_coding-promoter-TSS (ENSMUST00000159529.1)	316	ENSMUST00000159417.1	ENSMUSG00000026344	ENSMUST00000161361			Lypd1			protein_coding
Sox9_E11_Sample1_peak_1742	chr1	126159409	126159856	+	68	NA	intron (ENSMUST00000094609.9, intron 7 of 12)	protein_coding-intron (ENSMUST00000057846.14, intron 4 of 12)	-88171	ENSMUST00000194647.1	ENSMUSG00000102723	ENSMUST00000194647			Gm37936			TEC
Sox9_E11_Sample1_peak_1743	chr1	126253889	126254624	+	46	NA	intron (ENSMUST00000161954.7, intron 4 of 14)	protein_coding-intron (ENSMUST00000057846.14, intron 3 of 12)	70418	ENSMUST00000192213.1	ENSMUSG00000103824	ENSMUST00000192213			Gm38177			TEC
Sox9_E11_Sample1_peak_1744	chr1	126350563	126351261	+	66	NA	intron (ENSMUST00000160693.1, intron 5 of 5)	protein_coding-intron (ENSMUST00000057846.14, intron 2 of 12)	-26238	ENSMUST00000192213.1	ENSMUSG00000103824	ENSMUST00000192213			Gm38177			TEC
Sox9_E11_Sample1_peak_1746	chr1	126472718	126473155	+	60	NA	intron (ENSMUST00000162646.7, intron 3 of 6)	protein_coding-intron (ENSMUST00000094609.9, intron 3 of 12)	19806	ENSMUST00000162877.7	ENSMUSG00000049690	ENSMUST00000162647			Nckap5			protein_coding
Sox9_E11_Sample1_peak_1747	chr1	126492187	126493135	+	207	NA	promoter-TSS (ENSMUST00000162877.7)	protein_coding-promoter-TSS (ENSMUST00000162877.7)	81	ENSMUST00000162877.7	ENSMUSG00000049690	ENSMUST00000162647			Nckap5			protein_coding
Sox9_E11_Sample1_peak_1748	chr1	126515202	126515639	+	61	NA	intron (ENSMUST00000162646.7, intron 3 of 6)	protein_coding-intron (ENSMUST00000094609.9, intron 3 of 12)	-22493	ENSMUST00000161954.7	ENSMUSG00000049690	ENSMUST00000162647			Nckap5			protein_coding
Sox9_E11_Sample1_peak_1749	chr1	126603752	126605222	+	148	NA	intron (ENSMUST00000162647.1, intron 2 of 2)	protein_coding-intron (ENSMUST00000094609.9, intron 2 of 12)	-111560	ENSMUST00000161954.7	ENSMUSG00000049690	ENSMUST00000162647			Nckap5			protein_coding
Sox9_E11_Sample1_peak_1750	chr1	126617334	126617994	+	92	NA	intron (ENSMUST00000162647.1, intron 2 of 2)	protein_coding-intron (ENSMUST00000094609.9, intron 2 of 12)	120526	ENSMUST00000162664.7	ENSMUSG00000049690	ENSMUST00000162647			Nckap5			protein_coding
Sox9_E11_Sample1_peak_1751	chr1	126622091	126622889	+	123	NA	intron (ENSMUST00000162647.1, intron 2 of 2)	protein_coding-intron (ENSMUST00000094609.9, intron 2 of 12)	115700	ENSMUST00000162664.7	ENSMUSG00000049690	ENSMUST00000162647			Nckap5			protein_coding
Sox9_E11_Sample1_peak_1752	chr1	126675021	126675761	+	81	NA	intron (ENSMUST00000162647.1, intron 2 of 2)	protein_coding-intron (ENSMUST00000094609.9, intron 2 of 12)	62799	ENSMUST00000162664.7	ENSMUSG00000049690	ENSMUST00000162647			Nckap5			protein_coding
Sox9_E11_Sample1_peak_1754	chr1	126737632	126738995	+	132	NA	promoter-TSS (ENSMUST00000160693.1)	protein_coding-promoter-TSS (ENSMUST00000160693.1)	-111	ENSMUST00000160693.1	ENSMUSG00000049690	ENSMUST00000162647			Nckap5			protein_coding
Sox9_E11_Sample1_peak_1756	chr1	126752522	126753063	+	93	NA	intron (ENSMUST00000112583.7, intron 1 of 16)	protein_coding-intron (ENSMUST00000094609.9, intron 1 of 12)	-14590	ENSMUST00000160693.1	ENSMUSG00000049690	ENSMUST00000162647			Nckap5			protein_coding
Sox9_E11_Sample1_peak_1757	chr1	126830085	126830858	+	82	NA	promoter-TSS (ENSMUST00000162647.1)	protein_coding-promoter-TSS (ENSMUST00000162647.1)	10	ENSMUST00000162647.1	ENSMUSG00000049690	ENSMUST00000162647			Nckap5			protein_coding
Sox9_E11_Sample1_peak_1758	chr1	126832740	126833579	+	112	NA	Intergenic	Intergenic	-2360	ENSMUST00000162646.7	ENSMUSG00000049690	ENSMUST00000162647			Nckap5			protein_coding
Sox9_E11_Sample1_peak_1760	chr1	126917893	126918324	+	46	NA	Intergenic	Intergenic	-41493	ENSMUST00000188266.1	ENSMUSG00000101600	ENSMUST00000186724			4930599A14Rik			lncRNA
Sox9_E11_Sample1_peak_1762	chr1	126931863	126932385	+	146	NA	Intergenic	Intergenic	-55509	ENSMUST00000188266.1	ENSMUSG00000101600	ENSMUST00000186724			4930599A14Rik			lncRNA
Sox9_E11_Sample1_peak_1763	chr1	127002782	127003191	+	39	NA	Intergenic	Intergenic	47710	ENSMUST00000185860.1	ENSMUSG00000101385	ENSMUST00000185860			Gm5261			processed_pseudogene
Sox9_E11_Sample1_peak_1764	chr1	127103117	127104168	+	72	NA	Intergenic	Intergenic	-52946	ENSMUST00000185860.1	ENSMUSG00000101385	ENSMUST00000185860			Gm5261			processed_pseudogene
Sox9_E11_Sample1_peak_1765	chr1	127131613	127132549	+	118	NA	Intergenic	Intergenic	-72934	ENSMUST00000189427.6	ENSMUSG00000036155	ENSMUST00000171405			Mgat5			protein_coding
Sox9_E11_Sample1_peak_1766	chr1	127204621	127206476	+	455	NA	intron (ENSMUST00000189427.6, intron 1 of 7)	protein_coding-intron (ENSMUST00000038361.10, intron 1 of 17)	520	ENSMUST00000190921.1	ENSMUSG00000036155	ENSMUST00000171405			Mgat5			protein_coding
Sox9_E11_Sample1_peak_1767	chr1	127217234	127217342	+	36	NA	intron (ENSMUST00000189427.6, intron 1 of 7)	protein_coding-intron (ENSMUST00000038361.10, intron 1 of 17)	12260	ENSMUST00000190921.1	ENSMUSG00000036155	ENSMUST00000171405			Mgat5			protein_coding
Sox9_E11_Sample1_peak_1768	chr1	127290860	127291210	+	39	NA	intron (ENSMUST00000190921.1, intron 2 of 10)	protein_coding-intron (ENSMUST00000038361.10, intron 2 of 17)	-7927	ENSMUST00000170338.2	ENSMUSG00000099471	ENSMUST00000170338			Gm8451			processed_pseudogene
Sox9_E11_Sample1_peak_1769	chr1	127365577	127366694	+	146	NA	intron (ENSMUST00000189427.6, intron 4 of 7)	protein_coding-intron (ENSMUST00000038361.10, intron 5 of 17)	-8996	ENSMUST00000083753.1	ENSMUSG00000065687	ENSMUST00000083753			Gm23734			snoRNA
Sox9_E11_Sample1_peak_1770	chr1	127425238	127425982	+	78	NA	intron (ENSMUST00000171405.1, intron 10 of 15)	protein_coding-intron (ENSMUST00000038361.10, intron 12 of 17)	18834	ENSMUST00000195573.1	ENSMUSG00000103390	ENSMUST00000195573			Gm38301			TEC
Sox9_E11_Sample1_peak_1771	chr1	127458688	127459418	+	80	NA	intron (ENSMUST00000171405.1, intron 11 of 15)	protein_coding-intron (ENSMUST00000038361.10, intron 13 of 17)	41291	ENSMUST00000160111.7	ENSMUSG00000026347	ENSMUST00000027585			Tmem163			protein_coding
Sox9_E11_Sample1_peak_1774	chr1	127536979	127537931	+	68	NA	promoter-TSS (ENSMUST00000162406.1)	protein_coding-promoter-TSS (ENSMUST00000162406.1)	-25	ENSMUST00000162406.1	ENSMUSG00000026347	ENSMUST00000027585			Tmem163			protein_coding
Sox9_E11_Sample1_peak_1775	chr1	127568458	127569309	+	80	NA	intron (ENSMUST00000160616.7, intron 2 of 8)	protein_coding-intron (ENSMUST00000027585.13, intron 2 of 8)	-31453	ENSMUST00000162406.1	ENSMUSG00000026347	ENSMUST00000027585			Tmem163			protein_coding
Sox9_E11_Sample1_peak_1776	chr1	127625760	127626185	+	93	NA	intron (ENSMUST00000160616.7, intron 2 of 8)	protein_coding-intron (ENSMUST00000027585.13, intron 2 of 8)	52049	ENSMUST00000160616.7	ENSMUSG00000026347	ENSMUST00000027585			Tmem163			protein_coding
Sox9_E11_Sample1_peak_1777	chr1	127661144	127661818	+	60	NA	intron (ENSMUST00000160616.7, intron 2 of 8)	protein_coding-intron (ENSMUST00000027585.13, intron 2 of 8)	16540	ENSMUST00000160616.7	ENSMUSG00000026347	ENSMUST00000027585			Tmem163			protein_coding
Sox9_E11_Sample1_peak_1778	chr1	127677287	127678222	+	218	NA	exon (ENSMUST00000027585.13, exon 1 of 9)	protein_coding-exon (ENSMUST00000027585.13, exon 1 of 9)	267	ENSMUST00000160616.7	ENSMUSG00000026347	ENSMUST00000027585			Tmem163			protein_coding
Sox9_E11_Sample1_peak_1779	chr1	127755551	127756505	+	98	NA	promoter-TSS (ENSMUST00000186537.1)	protein_coding-promoter-TSS (ENSMUST00000186537.1)	-729	ENSMUST00000186537.1	ENSMUSG00000026348	ENSMUST00000186537			Acmsd			protein_coding
Sox9_E11_Sample1_peak_1780	chr1	127773616	127774832	+	255	NA	promoter-TSS (ENSMUST00000027587.14)	protein_coding-promoter-TSS (ENSMUST00000027587.14)	60	ENSMUST00000126850.7	ENSMUSG00000026349	ENSMUST00000143513			Ccnt2			protein_coding
Sox9_E11_Sample1_peak_1783	chr1	127868474	127869255	+	375	NA	promoter-TSS (ENSMUST00000037649.5)	protein_coding-promoter-TSS (ENSMUST00000037649.5)	52	ENSMUST00000212506.1	ENSMUSG00000036104	ENSMUST00000150945			Rab3gap1			protein_coding
Sox9_E11_Sample1_peak_1784	chr1	128013959	128014522	+	26	NA	intron (ENSMUST00000127393.7, intron 2 of 2)	protein_coding-intron (ENSMUST00000086614.11, intron 8 of 20)	4453	ENSMUST00000131732.1	ENSMUSG00000036086	ENSMUST00000143389			Zranb3			protein_coding
Sox9_E11_Sample1_peak_1785	chr1	128102454	128103859	+	876	NA	promoter-TSS (ENSMUST00000036288.10)	protein_coding-promoter-TSS (ENSMUST00000036288.10)	-109	ENSMUST00000097597.6	ENSMUSG00000036086	ENSMUST00000143389			Zranb3			protein_coding
Sox9_E11_Sample1_peak_1786	chr1	128243804	128245090	+	589	NA	exon (ENSMUST00000027592.5, exon 1 of 13)	protein_coding-exon (ENSMUST00000027592.5, exon 1 of 13)	285	ENSMUST00000027592.5	ENSMUSG00000026353	ENSMUST00000187031			Ubxn4			protein_coding
Sox9_E11_Sample1_peak_1788	chr1	128358916	128360088	+	499	NA	exon (ENSMUST00000027601.10, exon 1 of 17)	protein_coding-exon (ENSMUST00000027601.10, exon 1 of 17)	145	ENSMUST00000190495.1	ENSMUSG00000026355	ENSMUST00000188755			Mcm6			protein_coding
Sox9_E11_Sample1_peak_1790	chr1	128416658	128417771	+	402	NA	exon (ENSMUST00000027602.14, exon 1 of 16)	protein_coding-exon (ENSMUST00000027602.14, exon 1 of 16)	145	ENSMUST00000027602.14	ENSMUSG00000026356	ENSMUST00000186398			Dars			protein_coding
Sox9_E11_Sample1_peak_1791	chr1	128456750	128457535	+	39	NA	Intergenic	Intergenic	-32898	ENSMUST00000157571.1	ENSMUSG00000088196	ENSMUST00000157571			Gm23902			snoRNA
Sox9_E11_Sample1_peak_1792	chr1	128471863	128472951	+	466	NA	Intergenic	Intergenic	-17633	ENSMUST00000157571.1	ENSMUSG00000088196	ENSMUST00000157571			Gm23902			snoRNA
Sox9_E11_Sample1_peak_1793	chr1	128498047	128498690	+	93	NA	Intergenic	Intergenic	-3936	ENSMUST00000188996.1	ENSMUSG00000100152	ENSMUST00000188996			Gm29598			processed_pseudogene
Sox9_E11_Sample1_peak_1794	chr1	128549142	128549179	+	22	NA	Intergenic	Intergenic	-27700	ENSMUST00000187672.1	ENSMUSG00000100078	ENSMUST00000187672			Gm6170			processed_pseudogene
Sox9_E11_Sample1_peak_1795	chr1	128551880	128552365	+	88	NA	Intergenic	Intergenic	-30662	ENSMUST00000187672.1	ENSMUSG00000100078	ENSMUST00000187672			Gm6170			processed_pseudogene
Sox9_E11_Sample1_peak_1796	chr1	128591388	128593405	+	367	NA	promoter-TSS (ENSMUST00000052172.6)	protein_coding-promoter-TSS (ENSMUST00000052172.6)	-103	ENSMUST00000142893.1	ENSMUSG00000045382	ENSMUST00000142893			Cxcr4			protein_coding
Sox9_E11_Sample1_peak_1797	chr1	128611852	128612322	+	94	NA	Intergenic	Intergenic	-19794	ENSMUST00000142893.1	ENSMUSG00000045382	ENSMUST00000142893			Cxcr4			protein_coding
Sox9_E11_Sample1_peak_1798	chr1	128622962	128623757	+	60	NA	Intergenic	Intergenic	-31066	ENSMUST00000142893.1	ENSMUSG00000045382	ENSMUST00000142893			Cxcr4			protein_coding
Sox9_E11_Sample1_peak_1799	chr1	128642682	128644013	+	109	NA	Intergenic	Intergenic	-51054	ENSMUST00000142893.1	ENSMUSG00000045382	ENSMUST00000142893			Cxcr4			protein_coding
Sox9_E11_Sample1_peak_1800	chr1	128653083	128653649	+	73	NA	Intergenic	Intergenic	-61073	ENSMUST00000142893.1	ENSMUSG00000045382	ENSMUST00000142893			Cxcr4			protein_coding
Sox9_E11_Sample1_peak_1801	chr1	128654217	128654708	+	71	NA	Intergenic	Intergenic	-62169	ENSMUST00000142893.1	ENSMUSG00000045382	ENSMUST00000142893			Cxcr4			protein_coding
Sox9_E11_Sample1_peak_1803	chr1	128679137	128679824	+	169	NA	Intergenic	Intergenic	-71446	ENSMUST00000185285.1	ENSMUSG00000099403	ENSMUST00000185285			Gm29599			processed_pseudogene
Sox9_E11_Sample1_peak_1804	chr1	128682941	128683634	+	93	NA	Intergenic	Intergenic	-67639	ENSMUST00000185285.1	ENSMUSG00000099403	ENSMUST00000185285			Gm29599			processed_pseudogene
Sox9_E11_Sample1_peak_1805	chr1	128766123	128766647	+	53	NA	Intergenic	Intergenic	8036	ENSMUST00000181951.1	ENSMUSG00000097283	ENSMUST00000181951			Gm26686			lncRNA
Sox9_E11_Sample1_peak_1806	chr1	128803692	128804277	+	72	NA	Intergenic	Intergenic	-29563	ENSMUST00000181951.1	ENSMUSG00000097283	ENSMUST00000181951			Gm26686			lncRNA
Sox9_E11_Sample1_peak_1807	chr1	128824169	128824744	+	100	NA	Intergenic	Intergenic	-50035	ENSMUST00000181951.1	ENSMUSG00000097283	ENSMUST00000181951			Gm26686			lncRNA
Sox9_E11_Sample1_peak_1808	chr1	128832163	128832848	+	183	NA	Intergenic	Intergenic	53514	ENSMUST00000082803.1	ENSMUSG00000064737	ENSMUST00000082803			Gm23056			snRNA
Sox9_E11_Sample1_peak_1809	chr1	128875182	128875375	+	27	NA	Intergenic	Intergenic	10741	ENSMUST00000082803.1	ENSMUSG00000064737	ENSMUST00000082803			Gm23056			snRNA
Sox9_E11_Sample1_peak_1810	chr1	129069416	129069930	+	39	NA	Intergenic	Intergenic	-183654	ENSMUST00000082803.1	ENSMUSG00000064737	ENSMUST00000082803			Gm23056			snRNA
Sox9_E11_Sample1_peak_1811	chr1	129082121	129082800	+	93	NA	Intergenic	Intergenic	-190842	ENSMUST00000148051.1	ENSMUSG00000042581	ENSMUST00000190870			Thsd7b			protein_coding
Sox9_E11_Sample1_peak_1812	chr1	129272845	129274105	+	195	NA	promoter-TSS (ENSMUST00000040311.13)	protein_coding-promoter-TSS (ENSMUST00000040311.13)	-10	ENSMUST00000140629.1	ENSMUSG00000042581	ENSMUST00000190870			Thsd7b			protein_coding
Sox9_E11_Sample1_peak_1813	chr1	129562615	129562978	+	75	NA	intron (ENSMUST00000152305.2, intron 1 of 3)	protein_coding-intron (ENSMUST00000040311.13, intron 2 of 15)	25285	ENSMUST00000152305.2	ENSMUSG00000042581	ENSMUST00000190870			Thsd7b			protein_coding
Sox9_E11_Sample1_peak_1814	chr1	130274721	130275200	+	34	NA	intron (ENSMUST00000155992.1, intron 1 of 1)	lncRNA-intron (ENSMUST00000155992.1, intron 1 of 1)	6298	ENSMUST00000155992.1	ENSMUSG00000086633	ENSMUST00000155992			Gm16081			lncRNA
Sox9_E11_Sample1_peak_1815	chr1	130299324	130300662	+	132	NA	Intergenic	Intergenic	-18735	ENSMUST00000155992.1	ENSMUSG00000086633	ENSMUST00000155992			Gm16081			lncRNA
Sox9_E11_Sample1_peak_1816	chr1	130372104	130372591	+	50	NA	Intergenic	Intergenic	50393	ENSMUST00000136497.1	ENSMUSG00000026401	ENSMUST00000136497			Cd55b			protein_coding
Sox9_E11_Sample1_peak_1819	chr1	130443002	130443701	+	74	NA	intron (ENSMUST00000122830.1, intron 2 of 2)	protein_coding-intron (ENSMUST00000027650.12, intron 9 of 9)	5498	ENSMUST00000122830.1	ENSMUSG00000026399	ENSMUST00000140400			Cd55			protein_coding
Sox9_E11_Sample1_peak_1820	chr1	130461821	130463039	+	442	NA	promoter-TSS (ENSMUST00000125681.1)	lncRNA-promoter-TSS (ENSMUST00000125681.1)	21	ENSMUST00000133057.1	ENSMUSG00000026399	ENSMUST00000140400			Cd55			protein_coding
Sox9_E11_Sample1_peak_1821	chr1	130633700	130634459	+	129	NA	TTS (ENSMUST00000027657.13)	protein_coding-TTS (ENSMUST00000027657.13)	-4458	ENSMUST00000128128.7	ENSMUSG00000042554	ENSMUST00000142416			Zp3r			protein_coding
Sox9_E11_Sample1_peak_1822	chr1	130661474	130661949	+	53	NA	promoter-TSS (ENSMUST00000027657.13)	protein_coding-promoter-TSS (ENSMUST00000027657.13)	-79	ENSMUST00000027657.13	ENSMUSG00000026405	ENSMUST00000137276			C4bp			protein_coding
Sox9_E11_Sample1_peak_1823	chr1	130715324	130717766	+	273	NA	promoter-TSS (ENSMUST00000049813.5)	protein_coding-promoter-TSS (ENSMUST00000049813.5)	693	ENSMUST00000186777.1	ENSMUSG00000026409	ENSMUST00000186777			Pfkfb2			protein_coding
Sox9_E11_Sample1_peak_1824	chr1	130731617	130732333	+	107	NA	promoter-TSS (ENSMUST00000039323.7)	protein_coding-promoter-TSS (ENSMUST00000039323.7)	-1	ENSMUST00000039323.7	ENSMUSG00000042510	ENSMUST00000186185			AA986860			protein_coding
Sox9_E11_Sample1_peak_1825	chr1	130763661	130764463	+	280	NA	Intergenic	Intergenic	-2322	ENSMUST00000189150.1	ENSMUSG00000100106	ENSMUST00000189150			Gm28856			lncRNA
Sox9_E11_Sample1_peak_1826	chr1	130770341	130771021	+	141	NA	intron (ENSMUST00000189150.1, intron 2 of 3)	lncRNA-intron (ENSMUST00000189150.1, intron 2 of 3)	4297	ENSMUST00000189150.1	ENSMUSG00000100106	ENSMUST00000189150			Gm28856			lncRNA
Sox9_E11_Sample1_peak_1828	chr1	130838474	130838919	+	19	NA	intron (ENSMUST00000137782.1, intron 2 of 3)	protein_coding-intron (ENSMUST00000027675.13, intron 2 of 10)	9686	ENSMUST00000137782.1	ENSMUSG00000026417	ENSMUST00000027675			Pigr			protein_coding
Sox9_E11_Sample1_peak_1830	chr1	130875383	130875801	+	40	NA	TTS (ENSMUST00000149355.1)	protein_coding-TTS (ENSMUST00000149355.1)	-2566	ENSMUST00000126821.1	ENSMUSG00000042474	ENSMUST00000145446			Fcmr			protein_coding
Sox9_E11_Sample1_peak_1831	chr1	130877156	130878786	+	116	NA	promoter-TSS (ENSMUST00000126821.1)	protein_coding-promoter-TSS (ENSMUST00000126821.1)	-187	ENSMUST00000126821.1	ENSMUSG00000042474	ENSMUST00000145446			Fcmr			protein_coding
Sox9_E11_Sample1_peak_1832	chr1	131020346	131021035	+	61	NA	intron (ENSMUST00000016673.5, intron 1 of 4)	protein_coding-intron (ENSMUST00000016673.5, intron 1 of 4)	845	ENSMUST00000016673.5	ENSMUSG00000016529	ENSMUST00000016673			Il10			protein_coding
Sox9_E11_Sample1_peak_1833	chr1	131052899	131053675	+	45	NA	TTS (ENSMUST00000016672.10)	protein_coding-TTS (ENSMUST00000016672.10)	19239	ENSMUST00000188459.3	ENSMUSG00000016528	ENSMUST00000016672			Mapkapk2			protein_coding
Sox9_E11_Sample1_peak_1834	chr1	131083752	131084861	+	143	NA	intron (ENSMUST00000016672.10, intron 1 of 9)	protein_coding-intron (ENSMUST00000016672.10, intron 1 of 9)	7843	ENSMUST00000191688.1	ENSMUSG00000102856	ENSMUST00000191688			Gm37084			TEC
Sox9_E11_Sample1_peak_1835	chr1	131088741	131089126	+	84	NA	exon (ENSMUST00000191688.1, exon 1 of 1)	TEC-exon (ENSMUST00000191688.1, exon 1 of 1)	3216	ENSMUST00000191688.1	ENSMUSG00000102856	ENSMUST00000191688			Gm37084			TEC
Sox9_E11_Sample1_peak_1836	chr1	131096279	131097962	+	328	NA	intron (ENSMUST00000016672.10, intron 1 of 9)	protein_coding-intron (ENSMUST00000016672.10, intron 1 of 9)	706	ENSMUST00000016672.10	ENSMUSG00000016528	ENSMUST00000016672			Mapkapk2			protein_coding
Sox9_E11_Sample1_peak_1837	chr1	131107668	131108480	+	210	NA	Intergenic	Intergenic	-5329	ENSMUST00000158631.1	ENSMUSG00000089256	ENSMUST00000158631			Gm25717			misc_RNA
Sox9_E11_Sample1_peak_1838	chr1	131137547	131138999	+	446	NA	promoter-TSS (ENSMUST00000016670.8)	protein_coding-promoter-TSS (ENSMUST00000016670.8)	-28	ENSMUST00000189756.1	ENSMUSG00000016526	ENSMUST00000189756			Dyrk3			protein_coding
Sox9_E11_Sample1_peak_1839	chr1	131153111	131153782	+	184	NA	intron (ENSMUST00000112446.8, intron 1 of 14)	protein_coding-intron (ENSMUST00000068791.10, intron 1 of 12)	265	ENSMUST00000112446.8	ENSMUSG00000026427	ENSMUST00000151874			Eif2d			protein_coding
Sox9_E11_Sample1_peak_1840	chr1	131181603	131182076	+	73	NA	intron (ENSMUST00000068564.14, intron 2 of 4)	protein_coding-intron (ENSMUST00000027688.14, intron 3 of 5)	15460	ENSMUST00000153651.1	ENSMUSG00000026427	ENSMUST00000151874			Eif2d			protein_coding
Sox9_E11_Sample1_peak_1841	chr1	131199852	131200781	+	68	NA	promoter-TSS (ENSMUST00000068564.14)	protein_coding-promoter-TSS (ENSMUST00000068564.14)	-181	ENSMUST00000068564.14	ENSMUSG00000026430	ENSMUST00000027688			Rassf5			protein_coding
Sox9_E11_Sample1_peak_1842	chr1	131244703	131246066	+	174	NA	promoter-TSS (ENSMUST00000027688.14)	protein_coding-promoter-TSS (ENSMUST00000027688.14)	-126	ENSMUST00000124796.1	ENSMUSG00000026430	ENSMUST00000027688			Rassf5			protein_coding
Sox9_E11_Sample1_peak_1843	chr1	131252322	131252942	+	76	NA	Intergenic	Intergenic	-6875	ENSMUST00000188115.1	ENSMUSG00000102027	ENSMUST00000188115			Gm28914			lncRNA
Sox9_E11_Sample1_peak_1844	chr1	131259026	131260791	+	55	NA	exon (ENSMUST00000162437.1, exon 2 of 4)	protein_coding-exon (ENSMUST00000162437.1, exon 2 of 4)	401	ENSMUST00000188115.1	ENSMUSG00000102027	ENSMUST00000188115			Gm28914			lncRNA
Sox9_E11_Sample1_peak_1845	chr1	131270031	131270467	+	58	NA	TTS (ENSMUST00000162285.1)	protein_coding-TTS (ENSMUST00000162285.1)	295	ENSMUST00000163029.1	ENSMUSG00000042349	ENSMUST00000161764			Ikbke			protein_coding
Sox9_E11_Sample1_peak_1846	chr1	131279742	131280017	+	85	NA	promoter-TSS (ENSMUST00000062108.9)	protein_coding-promoter-TSS (ENSMUST00000062108.9)	-273	ENSMUST00000062108.9	ENSMUSG00000042349	ENSMUST00000161764			Ikbke			protein_coding
Sox9_E11_Sample1_peak_1849	chr1	131427229	131427968	+	165	NA	intron (ENSMUST00000185445.2, intron 2 of 2)	protein_coding-intron (ENSMUST00000097588.8, intron 3 of 22)	-18385	ENSMUST00000191427.1	ENSMUSG00000101778	ENSMUST00000191427			Gm29488			lncRNA
Sox9_E11_Sample1_peak_1850	chr1	131525935	131528330	+	464	NA	promoter-TSS (ENSMUST00000068613.4)	protein_coding-promoter-TSS (ENSMUST00000068613.4)	215	ENSMUST00000186543.6	ENSMUSG00000026425	ENSMUST00000186543			Srgap2			protein_coding
Sox9_E11_Sample1_peak_1851	chr1	131555062	131555596	+	46	NA	Intergenic	Intergenic	27426	ENSMUST00000068613.4	ENSMUSG00000055184	ENSMUST00000068613			Fam72a			protein_coding
Sox9_E11_Sample1_peak_1852	chr1	131598794	131600285	+	69	NA	promoter-TSS (ENSMUST00000190410.1)	protein_coding-promoter-TSS (ENSMUST00000190410.1)	-184	ENSMUST00000190410.1	ENSMUSG00000026432	ENSMUST00000027690			Avpr1b			protein_coding
Sox9_E11_Sample1_peak_1853	chr1	131612821	131613839	+	71	NA	Intergenic	Intergenic	13607	ENSMUST00000190410.1	ENSMUSG00000026432	ENSMUST00000027690			Avpr1b			protein_coding
Sox9_E11_Sample1_peak_1854	chr1	131623592	131624594	+	67	NA	Intergenic	Intergenic	8876	ENSMUST00000179174.2	ENSMUSG00000095841	ENSMUST00000179174			Gm8532			processed_pseudogene
Sox9_E11_Sample1_peak_1855	chr1	131657927	131658361	+	111	NA	intron (ENSMUST00000112411.1, intron 1 of 8)	protein_coding-intron (ENSMUST00000073350.12, intron 1 of 9)	-3767	ENSMUST00000141061.1	ENSMUSG00000004552	ENSMUST00000073350			Ctse			protein_coding
Sox9_E11_Sample1_peak_1856	chr1	131743555	131744685	+	118	NA	promoter-TSS (ENSMUST00000049027.9)	protein_coding-promoter-TSS (ENSMUST00000049027.9)	82	ENSMUST00000186122.6	ENSMUSG00000042268	ENSMUST00000049027			Slc26a9			protein_coding
Sox9_E11_Sample1_peak_1857	chr1	131764510	131765813	+	104	NA	intron (ENSMUST00000049027.9, intron 18 of 20)	protein_coding-intron (ENSMUST00000049027.9, intron 18 of 20)	14670	ENSMUST00000147800.1	ENSMUSG00000042268	ENSMUST00000049027			Slc26a9			protein_coding
Sox9_E11_Sample1_peak_1858	chr1	131797172	131797923	+	212	NA	exon (ENSMUST00000048660.11, exon 1 of 14)	protein_coding-exon (ENSMUST00000048660.11, exon 1 of 14)	149	ENSMUST00000048660.11	ENSMUSG00000042251	ENSMUST00000132450			Pm20d1			protein_coding
Sox9_E11_Sample1_peak_1859	chr1	131827560	131828821	+	239	NA	exon (ENSMUST00000086559.6, exon 1 of 11)	protein_coding-exon (ENSMUST00000086559.6, exon 1 of 11)	213	ENSMUST00000086559.6	ENSMUSG00000013275	ENSMUST00000146360			Slc41a1			protein_coding
Sox9_E11_Sample1_peak_1860	chr1	131867139	131868174	+	344	NA	promoter-TSS (ENSMUST00000187084.1)	protein_coding-promoter-TSS (ENSMUST00000187084.1)	3	ENSMUST00000187084.1	ENSMUSG00000026433	ENSMUST00000112386			Rab29			protein_coding
Sox9_E11_Sample1_peak_1861	chr1	131910102	131911427	+	321	NA	intron (ENSMUST00000189946.6, intron 1 of 6)	protein_coding-intron (ENSMUST00000062264.7, intron 1 of 6)	208	ENSMUST00000062264.7	ENSMUSG00000026434	ENSMUST00000187405			Nucks1			protein_coding
Sox9_E11_Sample1_peak_1862	chr1	131962741	131963901	+	226	NA	intron (ENSMUST00000177943.7, intron 1 of 4)	protein_coding-intron (ENSMUST00000177943.7, intron 1 of 4)	354	ENSMUST00000177943.7	ENSMUSG00000026435	ENSMUST00000185387			Slc45a3			protein_coding
Sox9_E11_Sample1_peak_1863	chr1	131970283	131971245	+	98	NA	exon (ENSMUST00000027695.7, exon 1 of 5)	protein_coding-exon (ENSMUST00000027695.7, exon 1 of 5)	155	ENSMUST00000027695.7	ENSMUSG00000026435	ENSMUST00000185387			Slc45a3			protein_coding
Sox9_E11_Sample1_peak_1864	chr1	131982366	131983112	+	53	NA	TTS (ENSMUST00000185387.1)	protein_coding-TTS (ENSMUST00000185387.1)	3775	ENSMUST00000185387.1	ENSMUSG00000026435	ENSMUST00000185387			Slc45a3			protein_coding
Sox9_E11_Sample1_peak_1865	chr1	132007349	132008554	+	183	NA	promoter-TSS (ENSMUST00000027696.9)	protein_coding-promoter-TSS (ENSMUST00000027696.9)	75	ENSMUST00000027696.9	ENSMUSG00000026436	ENSMUST00000131159			Elk4			protein_coding
Sox9_E11_Sample1_peak_1866	chr1	132067521	132068257	+	95	NA	promoter-TSS (ENSMUST00000046658.9)	protein_coding-promoter-TSS (ENSMUST00000046658.9)	11	ENSMUST00000161864.1	ENSMUSG00000059149	ENSMUST00000159038			Mfsd4a			protein_coding
Sox9_E11_Sample1_peak_1867	chr1	132138805	132140309	+	230	NA	promoter-TSS (ENSMUST00000112362.2)	protein_coding-promoter-TSS (ENSMUST00000112362.2)	48	ENSMUST00000112362.2	ENSMUSG00000026437	ENSMUST00000188387			Cdk18			protein_coding
Sox9_E11_Sample1_peak_1868	chr1	132151365	132152032	+	59	NA	Intergenic	Intergenic	-12014	ENSMUST00000027697.11	ENSMUSG00000026437	ENSMUST00000188387			Cdk18			protein_coding
Sox9_E11_Sample1_peak_1869	chr1	132190175	132192330	+	108	NA	promoter-TSS (ENSMUST00000112357.8)	protein_coding-promoter-TSS (ENSMUST00000112357.8)	-179	ENSMUST00000188169.6	ENSMUSG00000079330	ENSMUST00000185223			Lemd1			protein_coding
Sox9_E11_Sample1_peak_1871	chr1	132200863	132201635	+	23	NA	intron (ENSMUST00000189062.1, intron 1 of 1)	protein_coding-intron (ENSMUST00000112357.8, intron 1 of 3)	286	ENSMUST00000189062.1	ENSMUSG00000079330	ENSMUST00000185223			Lemd1			protein_coding
Sox9_E11_Sample1_peak_1872	chr1	132211166	132212480	+	57	NA	intron (ENSMUST00000188169.6, intron 1 of 4)	protein_coding-intron (ENSMUST00000112357.8, intron 1 of 3)	7971	ENSMUST00000185223.1	ENSMUSG00000079330	ENSMUST00000185223			Lemd1			protein_coding
Sox9_E11_Sample1_peak_1874	chr1	132266882	132267591	+	76	NA	Intergenic	Intergenic	13175	ENSMUST00000185761.1	ENSMUSG00000101549	ENSMUST00000185761			Gm29630			lncRNA
Sox9_E11_Sample1_peak_1875	chr1	132294986	132295970	+	78	NA	Intergenic	Intergenic	-3148	ENSMUST00000046071.4	ENSMUSG00000042115	ENSMUST00000046071			Klhdc8a			protein_coding
Sox9_E11_Sample1_peak_1876	chr1	132298222	132299246	+	83	NA	exon (ENSMUST00000046071.4, exon 1 of 5)	protein_coding-exon (ENSMUST00000046071.4, exon 1 of 5)	108	ENSMUST00000046071.4	ENSMUSG00000042115	ENSMUST00000046071			Klhdc8a			protein_coding
Sox9_E11_Sample1_peak_1877	chr1	132315995	132316521	+	67	NA	promoter-TSS (ENSMUST00000128661.1)	protein_coding-promoter-TSS (ENSMUST00000128661.1)	93	ENSMUST00000128661.1	ENSMUSG00000009772	ENSMUST00000082125			Nuak2			protein_coding
Sox9_E11_Sample1_peak_1878	chr1	132318112	132318518	+	63	NA	TTS (ENSMUST00000128661.1)	protein_coding-TTS (ENSMUST00000128661.1)	2150	ENSMUST00000128661.1	ENSMUSG00000009772	ENSMUST00000082125			Nuak2			protein_coding
Sox9_E11_Sample1_peak_1879	chr1	132333885	132334594	+	42	NA	TTS (ENSMUST00000072177.13)	protein_coding-TTS (ENSMUST00000072177.13)	6643	ENSMUST00000133246.1	ENSMUSG00000009772	ENSMUST00000082125			Nuak2			protein_coding
Sox9_E11_Sample1_peak_1880	chr1	132335081	132335437	+	30	NA	Intergenic	Intergenic	-6764	ENSMUST00000189288.1	ENSMUSG00000100658	ENSMUST00000189288			F730311O21Rik			lncRNA
Sox9_E11_Sample1_peak_1881	chr1	132355196	132355973	+	60	NA	TTS (ENSMUST00000045473.15)	protein_coding-TTS (ENSMUST00000045473.15)	9364	ENSMUST00000125439.1	ENSMUSG00000042066	ENSMUST00000142609			Tmcc2			protein_coding
Sox9_E11_Sample1_peak_1882	chr1	132390482	132391865	+	217	NA	promoter-TSS (ENSMUST00000132435.1)	protein_coding-promoter-TSS (ENSMUST00000132435.1)	108	ENSMUST00000045473.15	ENSMUSG00000042066	ENSMUST00000142609			Tmcc2			protein_coding
Sox9_E11_Sample1_peak_1883	chr1	132417372	132418235	+	400	NA	promoter-TSS (ENSMUST00000188973.1)	protein_coding-promoter-TSS (ENSMUST00000188973.1)	199	ENSMUST00000188389.1	ENSMUSG00000042046	ENSMUST00000187092			Dstyk			protein_coding
Sox9_E11_Sample1_peak_1884	chr1	132476780	132478055	+	217	NA	promoter-TSS (ENSMUST00000027700.14)	protein_coding-promoter-TSS (ENSMUST00000027700.14)	11	ENSMUST00000187505.6	ENSMUSG00000026439	ENSMUST00000190825			Rbbp5			protein_coding
Sox9_E11_Sample1_peak_1885	chr1	132520480	132520966	+	46	NA	intron (ENSMUST00000186487.6, intron 15 of 21)	protein_coding-intron (ENSMUST00000086521.10, intron 16 of 22)	-1566	ENSMUST00000188143.1	ENSMUSG00000053024	ENSMUST00000086521			Cntn2			protein_coding
Sox9_E11_Sample1_peak_1886	chr1	132525948	132527112	+	60	NA	intron (ENSMUST00000190601.6, intron 6 of 21)	protein_coding-intron (ENSMUST00000086521.10, intron 7 of 22)	-3137	ENSMUST00000188065.6	ENSMUSG00000053024	ENSMUST00000086521			Cntn2			protein_coding
Sox9_E11_Sample1_peak_1887	chr1	132538397	132538999	+	55	NA	intron (ENSMUST00000186530.2, intron 2 of 2)	protein_coding-intron (ENSMUST00000086521.10, intron 1 of 22)	4167	ENSMUST00000190601.6	ENSMUSG00000053024	ENSMUST00000086521			Cntn2			protein_coding
Sox9_E11_Sample1_peak_1888	chr1	132586721	132587381	+	76	NA	promoter-TSS (ENSMUST00000186330.1)	protein_coding-promoter-TSS (ENSMUST00000186330.1)	89	ENSMUST00000186330.1	ENSMUSG00000026442	ENSMUST00000163770			Nfasc			protein_coding
Sox9_E11_Sample1_peak_1889	chr1	132594662	132595073	+	76	NA	intron (ENSMUST00000163770.7, intron 24 of 27)	protein_coding-intron (ENSMUST00000043189.13, intron 23 of 26)	-7727	ENSMUST00000186330.1	ENSMUSG00000026442	ENSMUST00000163770			Nfasc			protein_coding
Sox9_E11_Sample1_peak_1890	chr1	132766016	132766300	+	60	NA	Intergenic	Intergenic	-24361	ENSMUST00000188307.1	ENSMUSG00000026442	ENSMUST00000163770			Nfasc			protein_coding
Sox9_E11_Sample1_peak_1891	chr1	132880207	132881682	+	117	NA	intron (ENSMUST00000159088.1, intron 1 of 1)	protein_coding-intron (ENSMUST00000027706.3, intron 1 of 1)	589	ENSMUST00000159088.1	ENSMUSG00000026443	ENSMUST00000159088			Lrrn2			protein_coding
Sox9_E11_Sample1_peak_1892	chr1	133024998	133025708	+	227	NA	promoter-TSS (ENSMUST00000067398.12)	protein_coding-promoter-TSS (ENSMUST00000067398.12)	1	ENSMUST00000185398.6	ENSMUSG00000054387	ENSMUST00000187529			Mdm4			protein_coding
Sox9_E11_Sample1_peak_1893	chr1	133033385	133034354	+	160	NA	Intergenic	Intergenic	-3308	ENSMUST00000190807.1	ENSMUSG00000054387	ENSMUST00000187529			Mdm4			protein_coding
Sox9_E11_Sample1_peak_1894	chr1	133045450	133047200	+	227	NA	exon (ENSMUST00000077730.6, exon 1 of 33)	protein_coding-exon (ENSMUST00000077730.6, exon 1 of 33)	313	ENSMUST00000124934.7	ENSMUSG00000026447	ENSMUST00000124934			Pik3c2b			protein_coding
Sox9_E11_Sample1_peak_1895	chr1	133090075	133091822	+	91	NA	intron (ENSMUST00000077730.6, intron 19 of 32)	protein_coding-intron (ENSMUST00000077730.6, intron 19 of 32)	-22543	ENSMUST00000186515.1	ENSMUSG00000101102	ENSMUST00000186515			Gm28609			lncRNA
Sox9_E11_Sample1_peak_1896	chr1	133101343	133101580	+	68	NA	intron (ENSMUST00000077730.6, intron 28 of 32)	protein_coding-intron (ENSMUST00000077730.6, intron 28 of 32)	-29682	ENSMUST00000052529.3	ENSMUSG00000046062	ENSMUST00000122956			Ppp1r15b			protein_coding
Sox9_E11_Sample1_peak_1897	chr1	133130648	133132094	+	225	NA	promoter-TSS (ENSMUST00000122956.1)	protein_coding-promoter-TSS (ENSMUST00000122956.1)	27	ENSMUST00000122956.1	ENSMUSG00000046062	ENSMUST00000122956			Ppp1r15b			protein_coding
Sox9_E11_Sample1_peak_1898	chr1	133163946	133164919	+	85	NA	exon (ENSMUST00000212252.1, exon 1 of 10)	protein_coding-exon (ENSMUST00000212252.1, exon 1 of 10)	222	ENSMUST00000212252.1	ENSMUSG00000041757	ENSMUST00000212252			Plekha6			protein_coding
Sox9_E11_Sample1_peak_1899	chr1	133181157	133182767	+	97	NA	intron (ENSMUST00000187285.6, intron 1 of 22)	protein_coding-intron (ENSMUST00000187285.6, intron 1 of 22)	641	ENSMUST00000187285.6	ENSMUSG00000041757	ENSMUST00000212252			Plekha6			protein_coding
Sox9_E11_Sample1_peak_1901	chr1	133236920	133237537	+	85	NA	intron (ENSMUST00000187285.6, intron 1 of 22)	protein_coding-intron (ENSMUST00000187285.6, intron 1 of 22)	-8869	ENSMUST00000105082.8	ENSMUSG00000041757	ENSMUST00000212252			Plekha6			protein_coding
Sox9_E11_Sample1_peak_1902	chr1	133245610	133246375	+	62	NA	promoter-TSS (ENSMUST00000038295.14)	protein_coding-promoter-TSS (ENSMUST00000038295.14)	-105	ENSMUST00000105082.8	ENSMUSG00000041757	ENSMUST00000212252			Plekha6			protein_coding
Sox9_E11_Sample1_peak_1903	chr1	133255067	133256090	+	71	NA	promoter-TSS (ENSMUST00000212142.1)	protein_coding-promoter-TSS (ENSMUST00000212142.1)	774	ENSMUST00000186027.1	ENSMUSG00000101693	ENSMUST00000186799			Gm19461			lncRNA
Sox9_E11_Sample1_peak_1904	chr1	133307064	133307527	+	20	NA	Intergenic	Intergenic	-2505	ENSMUST00000094557.6	ENSMUSG00000103421	ENSMUST00000094557			Golt1a			protein_coding
Sox9_E11_Sample1_peak_1905	chr1	133329072	133329816	+	76	NA	exon (ENSMUST00000007433.4, exon 3 of 3)	protein_coding-exon (ENSMUST00000007433.4, exon 3 of 3)	2232	ENSMUST00000178033.4	ENSMUSG00000116158	ENSMUST00000007433			Kiss1			protein_coding
Sox9_E11_Sample1_peak_1906	chr1	133363237	133364501	+	358	NA	exon (ENSMUST00000135222.8, exon 1 of 8)	protein_coding-exon (ENSMUST00000135222.8, exon 1 of 8)	293	ENSMUST00000147909.7	ENSMUSG00000070644	ENSMUST00000147909			Etnk2			protein_coding
Sox9_E11_Sample1_peak_1907	chr1	133418081	133418677	+	45	NA	intron (ENSMUST00000153799.7, intron 1 of 13)	protein_coding-intron (ENSMUST00000153799.7, intron 1 of 13)	5998	ENSMUST00000153799.7	ENSMUSG00000070643	ENSMUST00000145922			Sox13			protein_coding
Sox9_E11_Sample1_peak_1908	chr1	133423245	133424467	+	95	NA	intron (ENSMUST00000153799.7, intron 1 of 13)	protein_coding-intron (ENSMUST00000153799.7, intron 1 of 13)	521	ENSMUST00000153799.7	ENSMUSG00000070643	ENSMUST00000145922			Sox13			protein_coding
Sox9_E11_Sample1_peak_1909	chr1	133434380	133434981	+	39	NA	Intergenic	Intergenic	-10303	ENSMUST00000153799.7	ENSMUSG00000070643	ENSMUST00000145922			Sox13			protein_coding
Sox9_E11_Sample1_peak_1910	chr1	133492397	133493766	+	115	NA	Intergenic	Intergenic	-36398	ENSMUST00000188004.1	ENSMUSG00000101004	ENSMUST00000188004			Gm8596			processed_pseudogene
Sox9_E11_Sample1_peak_1911	chr1	133609794	133610470	+	418	NA	promoter-TSS (ENSMUST00000164574.1)	protein_coding-promoter-TSS (ENSMUST00000164574.1)	83	ENSMUST00000164574.1	ENSMUSG00000090553	ENSMUST00000172079			Snrpe			protein_coding
Sox9_E11_Sample1_peak_1913	chr1	133660646	133661734	+	214	NA	promoter-TSS (ENSMUST00000191705.5)	protein_coding-promoter-TSS (ENSMUST00000191705.5)	91	ENSMUST00000191705.5	ENSMUSG00000102976	ENSMUST00000195424			Zc3h11a			protein_coding
Sox9_E11_Sample1_peak_1914	chr1	133693899	133695087	+	58	NA	Intergenic	Intergenic	-4385	ENSMUST00000169295.7	ENSMUSG00000051998	ENSMUST00000189524			Lax1			protein_coding
Sox9_E11_Sample1_peak_1915	chr1	133695664	133696404	+	92	NA	Intergenic	Intergenic	5847	ENSMUST00000167348.1	ENSMUSG00000026463	ENSMUST00000048953			Atp2b4			protein_coding
Sox9_E11_Sample1_peak_1916	chr1	133767179	133767860	+	20	NA	intron (ENSMUST00000143567.7, intron 1 of 20)	protein_coding-intron (ENSMUST00000128692.1, intron 2 of 2)	10902	ENSMUST00000193173.1	ENSMUSG00000102509	ENSMUST00000193173			Gm37368			TEC
Sox9_E11_Sample1_peak_1917	chr1	133800489	133801454	+	127	NA	promoter-TSS (ENSMUST00000128692.1)	protein_coding-promoter-TSS (ENSMUST00000128692.1)	65	ENSMUST00000128692.1	ENSMUSG00000026463	ENSMUST00000048953			Atp2b4			protein_coding
Sox9_E11_Sample1_peak_1919	chr1	133920366	133921623	+	62	NA	intron (ENSMUST00000048432.5, intron 1 of 2)	protein_coding-intron (ENSMUST00000048432.5, intron 1 of 2)	417	ENSMUST00000127583.1	ENSMUSG00000041577	ENSMUST00000048432			Prelp			protein_coding
Sox9_E11_Sample1_peak_1920	chr1	133961608	133962125	+	60	NA	promoter-TSS (ENSMUST00000188504.1)	lncRNA-promoter-TSS (ENSMUST00000188504.1)	-296	ENSMUST00000188504.1	ENSMUSG00000100987	ENSMUST00000188504			Gm1627			lncRNA
Sox9_E11_Sample1_peak_1921	chr1	134005827	134006998	+	262	NA	Intergenic	Intergenic	26966	ENSMUST00000186040.1	ENSMUSG00000099507	ENSMUST00000186040			Gm18970			processed_pseudogene
Sox9_E11_Sample1_peak_1922	chr1	134036908	134037713	+	68	NA	promoter-TSS (ENSMUST00000048183.7)	protein_coding-promoter-TSS (ENSMUST00000048183.7)	56	ENSMUST00000048183.7	ENSMUSG00000041559	ENSMUST00000162779			Fmod			protein_coding
Sox9_E11_Sample1_peak_1923	chr1	134060607	134061408	+	293	NA	Intergenic	Intergenic	18113	ENSMUST00000020692.6	ENSMUSG00000020423	ENSMUST00000020692			Btg2			protein_coding
Sox9_E11_Sample1_peak_1924	chr1	134070065	134070902	+	131	NA	Intergenic	Intergenic	8637	ENSMUST00000020692.6	ENSMUSG00000020423	ENSMUST00000020692			Btg2			protein_coding
Sox9_E11_Sample1_peak_1925	chr1	134078330	134079989	+	169	NA	promoter-TSS (ENSMUST00000020692.6)	protein_coding-promoter-TSS (ENSMUST00000020692.6)	-39	ENSMUST00000020692.6	ENSMUSG00000020423	ENSMUST00000020692			Btg2			protein_coding
Sox9_E11_Sample1_peak_1926	chr1	134092645	134093609	+	135	NA	Intergenic	Intergenic	6032	ENSMUST00000193617.1	ENSMUSG00000102380	ENSMUST00000193617			Gm38140			TEC
Sox9_E11_Sample1_peak_1927	chr1	134098942	134099815	+	123	NA	promoter-TSS (ENSMUST00000193617.1)	TEC-promoter-TSS (ENSMUST00000193617.1)	-219	ENSMUST00000193617.1	ENSMUSG00000102380	ENSMUST00000193617			Gm38140			TEC
Sox9_E11_Sample1_peak_1928	chr1	134106219	134106898	+	102	NA	Intergenic	Intergenic	-2810	ENSMUST00000097570.2	ENSMUSG00000073559	ENSMUST00000097570			Gm8618			processed_pseudogene
Sox9_E11_Sample1_peak_1929	chr1	134205697	134206205	+	46	NA	intron (ENSMUST00000187631.1, intron 2 of 2)	protein_coding-intron (ENSMUST00000038191.7, intron 1 of 1)	12494	ENSMUST00000191577.1	ENSMUSG00000042451	ENSMUST00000191577			Mybph			protein_coding
Sox9_E11_Sample1_peak_1930	chr1	134234836	134235756	+	93	NA	promoter-TSS (ENSMUST00000169927.1)	protein_coding-promoter-TSS (ENSMUST00000169927.1)	68	ENSMUST00000187631.1	ENSMUSG00000042429	ENSMUST00000187631			Adora1			protein_coding
Sox9_E11_Sample1_peak_1931	chr1	134243972	134244468	+	32	NA	Intergenic	Intergenic	-8789	ENSMUST00000086465.5	ENSMUSG00000042429	ENSMUST00000187631			Adora1			protein_coding
Sox9_E11_Sample1_peak_1933	chr1	134298805	134299340	+	53	NA	exon (ENSMUST00000168515.7, exon 28 of 29)	protein_coding-exon (ENSMUST00000168515.7, exon 28 of 29)	5736	ENSMUST00000189862.6	ENSMUSG00000026458	ENSMUST00000186730			Ppfia4			protein_coding
Sox9_E11_Sample1_peak_1934	chr1	134343843	134344878	+	173	NA	Intergenic	Intergenic	5945	ENSMUST00000189572.1	ENSMUSG00000042305	ENSMUST00000185903			Tmem183a			protein_coding
Sox9_E11_Sample1_peak_1935	chr1	134361507	134362363	+	197	NA	promoter-TSS (ENSMUST00000049470.10)	protein_coding-promoter-TSS (ENSMUST00000049470.10)	6	ENSMUST00000191237.6	ENSMUSG00000042305	ENSMUST00000185903			Tmem183a			protein_coding
Sox9_E11_Sample1_peak_1936	chr1	134382012	134382433	+	39	NA	Intergenic	Intergenic	-3718	ENSMUST00000162187.1	ENSMUSG00000050526	ENSMUST00000162187			Mgat4f			protein_coding
Sox9_E11_Sample1_peak_1937	chr1	134405737	134406409	+	217	NA	promoter-TSS (ENSMUST00000127412.8)	protein_coding-promoter-TSS (ENSMUST00000127412.8)	45	ENSMUST00000133686.7	ENSMUSG00000026456	ENSMUST00000174315			Cyb5r1			protein_coding
Sox9_E11_Sample1_peak_1938	chr1	134414906	134415972	+	339	NA	promoter-TSS (ENSMUST00000027727.14)	protein_coding-promoter-TSS (ENSMUST00000027727.14)	-17	ENSMUST00000112237.1	ENSMUSG00000026457	ENSMUST00000112237			Adipor1			protein_coding
Sox9_E11_Sample1_peak_1939	chr1	134454874	134455996	+	144	NA	promoter-TSS (ENSMUST00000027725.10)	protein_coding-promoter-TSS (ENSMUST00000027725.10)	38	ENSMUST00000192012.1	ENSMUSG00000102722	ENSMUST00000192012			Gm37935			TEC
Sox9_E11_Sample1_peak_1940	chr1	134494241	134495256	+	449	NA	promoter-TSS (ENSMUST00000047978.8)	protein_coding-promoter-TSS (ENSMUST00000047978.8)	100	ENSMUST00000047978.8	ENSMUSG00000042229	ENSMUST00000047978			Rabif			protein_coding
Sox9_E11_Sample1_peak_1941	chr1	134513268	134513948	+	83	NA	Intergenic	Intergenic	-4473	ENSMUST00000179718.1	ENSMUSG00000096712	ENSMUST00000179718			Gm15454			processed_pseudogene
Sox9_E11_Sample1_peak_1943	chr1	134555367	134557097	+	139	NA	Intergenic	Intergenic	-3939	ENSMUST00000047714.13	ENSMUSG00000042207	ENSMUST00000112198			Kdm5b			protein_coding
Sox9_E11_Sample1_peak_1944	chr1	134560285	134561416	+	70	NA	intron (ENSMUST00000047714.13, intron 1 of 26)	protein_coding-intron (ENSMUST00000047714.13, intron 1 of 26)	643	ENSMUST00000112197.2	ENSMUSG00000042207	ENSMUST00000112198			Kdm5b			protein_coding
Sox9_E11_Sample1_peak_1945	chr1	134643724	134644146	+	103	NA	exon (ENSMUST00000181197.1, exon 2 of 2)	lncRNA-exon (ENSMUST00000181197.1, exon 2 of 2)	2585	ENSMUST00000181197.1	ENSMUSG00000097435	ENSMUST00000181197			Gm26783			lncRNA
Sox9_E11_Sample1_peak_1946	chr1	134708649	134709484	+	79	NA	promoter-TSS (ENSMUST00000121990.1)	protein_coding-promoter-TSS (ENSMUST00000121990.1)	-234	ENSMUST00000121990.1	ENSMUSG00000026452	ENSMUST00000188842			Syt2			protein_coding
Sox9_E11_Sample1_peak_1947	chr1	134713483	134714168	+	78	NA	intron (ENSMUST00000121990.1, intron 1 of 8)	protein_coding-intron (ENSMUST00000121990.1, intron 1 of 8)	4525	ENSMUST00000121990.1	ENSMUSG00000026452	ENSMUST00000188842			Syt2			protein_coding
Sox9_E11_Sample1_peak_1948	chr1	134755058	134755454	+	21	NA	TTS (ENSMUST00000137022.1)	protein_coding-TTS (ENSMUST00000137022.1)	5097	ENSMUST00000137022.1	ENSMUSG00000073557	ENSMUST00000112163			Ppp1r12b			protein_coding
Sox9_E11_Sample1_peak_1949	chr1	134783944	134784702	+	182	NA	intron (ENSMUST00000156348.7, intron 6 of 12)	protein_coding-intron (ENSMUST00000045665.12, intron 18 of 23)	-1026	ENSMUST00000191540.1	ENSMUSG00000073557	ENSMUST00000112163			Ppp1r12b			protein_coding
Sox9_E11_Sample1_peak_1951	chr1	134940661	134941568	+	102	NA	intron (ENSMUST00000132025.1, intron 1 of 19)	protein_coding-intron (ENSMUST00000045665.12, intron 1 of 23)	14737	ENSMUST00000168381.7	ENSMUSG00000073557	ENSMUST00000112163			Ppp1r12b			protein_coding
Sox9_E11_Sample1_peak_1952	chr1	134955194	134956269	+	157	NA	exon (ENSMUST00000045665.12, exon 1 of 24)	protein_coding-exon (ENSMUST00000045665.12, exon 1 of 24)	120	ENSMUST00000168381.7	ENSMUSG00000073557	ENSMUST00000112163			Ppp1r12b			protein_coding
Sox9_E11_Sample1_peak_1953	chr1	134962114	134963026	+	207	NA	promoter-TSS (ENSMUST00000027687.7)	protein_coding-promoter-TSS (ENSMUST00000027687.7)	5	ENSMUST00000027687.7	ENSMUSG00000026429	ENSMUST00000188177			Ube2t			protein_coding
Sox9_E11_Sample1_peak_1954	chr1	135020857	135021416	+	39	NA	intron (ENSMUST00000044828.13, intron 6 of 17)	protein_coding-intron (ENSMUST00000044828.13, intron 6 of 17)	955	ENSMUST00000139369.1	ENSMUSG00000042793	ENSMUST00000137968			Lgr6			protein_coding
Sox9_E11_Sample1_peak_1955	chr1	135105272	135106195	+	62	NA	promoter-TSS (ENSMUST00000044828.13)	protein_coding-promoter-TSS (ENSMUST00000044828.13)	-457	ENSMUST00000044828.13	ENSMUSG00000042793	ENSMUST00000137968			Lgr6			protein_coding
Sox9_E11_Sample1_peak_1956	chr1	135146630	135147729	+	211	NA	promoter-TSS (ENSMUST00000125774.1)	protein_coding-promoter-TSS (ENSMUST00000125774.1)	355	ENSMUST00000027684.10	ENSMUSG00000026426	ENSMUST00000141177			Arl8a			protein_coding
Sox9_E11_Sample1_peak_1957	chr1	135154151	135154849	+	94	NA	TTS (ENSMUST00000123344.1)	protein_coding-TTS (ENSMUST00000123344.1)	318	ENSMUST00000141177.1	ENSMUSG00000026426	ENSMUST00000141177			Arl8a			protein_coding
Sox9_E11_Sample1_peak_1958	chr1	135171455	135171950	+	32	NA	Intergenic	Intergenic	-4021	ENSMUST00000027682.8	ENSMUSG00000026424	ENSMUST00000027682			Gpr37l1			protein_coding
Sox9_E11_Sample1_peak_1959	chr1	135198802	135199712	+	310	NA	Intergenic	Intergenic	-31576	ENSMUST00000027682.8	ENSMUSG00000026424	ENSMUST00000027682			Gpr37l1			protein_coding
Sox9_E11_Sample1_peak_1961	chr1	135248449	135248978	+	60	NA	intron (ENSMUST00000180981.1, intron 1 of 2)	lncRNA-intron (ENSMUST00000180981.1, intron 1 of 2)	152	ENSMUST00000180981.1	ENSMUSG00000097680	ENSMUST00000180981			Gm26642			lncRNA
Sox9_E11_Sample1_peak_1962	chr1	135258268	135259269	+	331	NA	promoter-TSS (ENSMUST00000003135.13)	protein_coding-promoter-TSS (ENSMUST00000003135.13)	-200	ENSMUST00000003135.13	ENSMUSG00000003051	ENSMUST00000188895			Elf3			protein_coding
Sox9_E11_Sample1_peak_1963	chr1	135283320	135284247	+	157	NA	exon (ENSMUST00000074357.7, exon 1 of 10)	protein_coding-exon (ENSMUST00000074357.7, exon 1 of 10)	301	ENSMUST00000074357.7	ENSMUSG00000041926	ENSMUST00000189615			Rnpep			protein_coding
Sox9_E11_Sample1_peak_1964	chr1	135313270	135314070	+	254	NA	promoter-TSS (ENSMUST00000134088.2)	protein_coding-promoter-TSS (ENSMUST00000134088.2)	21	ENSMUST00000134088.2	ENSMUSG00000062580	ENSMUST00000081104			Timm17a			protein_coding
Sox9_E11_Sample1_peak_1965	chr1	135324293	135325276	+	88	NA	promoter-TSS (ENSMUST00000059352.2)	protein_coding-promoter-TSS (ENSMUST00000059352.2)	-23	ENSMUST00000059352.2	ENSMUSG00000048096	ENSMUST00000059352			Lmod1			protein_coding
Sox9_E11_Sample1_peak_1966	chr1	135368181	135369306	+	155	NA	TTS (ENSMUST00000059352.2)	protein_coding-TTS (ENSMUST00000059352.2)	4707	ENSMUST00000159918.1	ENSMUSG00000041889	ENSMUST00000041240			Shisa4			protein_coding
Sox9_E11_Sample1_peak_1967	chr1	135374288	135375500	+	219	NA	exon (ENSMUST00000041240.3, exon 1 of 5)	protein_coding-exon (ENSMUST00000041240.3, exon 1 of 5)	183	ENSMUST00000159181.1	ENSMUSG00000041889	ENSMUST00000041240			Shisa4			protein_coding
Sox9_E11_Sample1_peak_1968	chr1	135429836	135430802	+	177	NA	promoter-TSS (ENSMUST00000159173.1)	protein_coding-promoter-TSS (ENSMUST00000159173.1)	100	ENSMUST00000159173.1	ENSMUSG00000041879	ENSMUST00000161838			Ipo9			protein_coding
Sox9_E11_Sample1_peak_1969	chr1	135499164	135499584	+	53	NA	intron (ENSMUST00000190298.7, intron 6 of 30)	protein_coding-intron (ENSMUST00000040599.14, intron 3 of 29)	11010	ENSMUST00000189362.6	ENSMUSG00000009418	ENSMUST00000187311			Nav1			protein_coding
Sox9_E11_Sample1_peak_1970	chr1	135509145	135511064	+	188	NA	intron (ENSMUST00000190298.7, intron 6 of 30)	protein_coding-intron (ENSMUST00000040599.14, intron 3 of 29)	280	ENSMUST00000189362.6	ENSMUSG00000009418	ENSMUST00000187311			Nav1			protein_coding
Sox9_E11_Sample1_peak_1971	chr1	135557914	135558272	+	58	NA	intron (ENSMUST00000190298.7, intron 4 of 30)	protein_coding-intron (ENSMUST00000040599.14, intron 1 of 29)	-26680	ENSMUST00000067468.5	ENSMUSG00000054412	ENSMUST00000067468			Gm4793			lncRNA
Sox9_E11_Sample1_peak_1972	chr1	135584780	135585765	+	93	NA	promoter-TSS (ENSMUST00000040599.14)	protein_coding-promoter-TSS (ENSMUST00000040599.14)	83	ENSMUST00000040599.14	ENSMUSG00000009418	ENSMUST00000187311			Nav1			protein_coding
Sox9_E11_Sample1_peak_1973	chr1	135670592	135671061	+	46	NA	intron (ENSMUST00000112103.1, intron 1 of 1)	protein_coding-intron (ENSMUST00000112103.1, intron 1 of 1)	17279	ENSMUST00000190298.7	ENSMUSG00000009418	ENSMUST00000187311			Nav1			protein_coding
Sox9_E11_Sample1_peak_1974	chr1	135686846	135688475	+	202	NA	intron (ENSMUST00000112103.1, intron 1 of 1)	protein_coding-intron (ENSMUST00000112103.1, intron 1 of 1)	445	ENSMUST00000190298.7	ENSMUSG00000009418	ENSMUST00000187311			Nav1			protein_coding
Sox9_E11_Sample1_peak_1975	chr1	135698595	135699598	+	76	NA	Intergenic	Intergenic	-10991	ENSMUST00000112103.1	ENSMUSG00000009418	ENSMUST00000187311			Nav1			protein_coding
Sox9_E11_Sample1_peak_1976	chr1	135719610	135720143	+	53	NA	promoter-TSS (ENSMUST00000097561.8)	protein_coding-promoter-TSS (ENSMUST00000097561.8)	-185	ENSMUST00000097561.8	ENSMUSG00000026421	ENSMUST00000027677			Csrp1			protein_coding
Sox9_E11_Sample1_peak_1977	chr1	135729133	135729874	+	105	NA	intron (ENSMUST00000027677.7, intron 1 of 5)	protein_coding-intron (ENSMUST00000027677.7, intron 1 of 5)	356	ENSMUST00000027677.7	ENSMUSG00000026421	ENSMUST00000027677			Csrp1			protein_coding
Sox9_E11_Sample1_peak_1978	chr1	135731535	135732362	+	178	NA	intron (ENSMUST00000027677.7, intron 1 of 5)	protein_coding-intron (ENSMUST00000027677.7, intron 1 of 5)	2801	ENSMUST00000027677.7	ENSMUSG00000026421	ENSMUST00000027677			Csrp1			protein_coding
Sox9_E11_Sample1_peak_1980	chr1	135752734	135753187	+	60	NA	TTS (ENSMUST00000027677.7)	protein_coding-TTS (ENSMUST00000027677.7)	-13159	ENSMUST00000038945.5	ENSMUSG00000041801	ENSMUST00000038945			Phlda3			protein_coding
Sox9_E11_Sample1_peak_1981	chr1	135765649	135766805	+	268	NA	promoter-TSS (ENSMUST00000136445.1)	protein_coding-promoter-TSS (ENSMUST00000136445.1)	108	ENSMUST00000038945.5	ENSMUSG00000041801	ENSMUST00000038945			Phlda3			protein_coding
Sox9_E11_Sample1_peak_1982	chr1	135780794	135781414	+	68	NA	intron (ENSMUST00000187830.6, intron 1 of 4)	protein_coding-intron (ENSMUST00000187830.6, intron 1 of 4)	1670	ENSMUST00000187830.6	ENSMUSG00000026418	ENSMUST00000148201			Tnni1			protein_coding
Sox9_E11_Sample1_peak_1984	chr1	135794098	135794768	+	65	NA	intron (ENSMUST00000132795.7, intron 2 of 6)	protein_coding-intron (ENSMUST00000132795.7, intron 2 of 6)	-4969	ENSMUST00000152208.7	ENSMUSG00000026418	ENSMUST00000148201			Tnni1			protein_coding
Sox9_E11_Sample1_peak_1985	chr1	135818442	135819654	+	278	NA	intron (ENSMUST00000038760.9, intron 1 of 9)	protein_coding-intron (ENSMUST00000038760.9, intron 1 of 9)	450	ENSMUST00000038760.9	ENSMUSG00000041782	ENSMUST00000038760			Lad1			protein_coding
Sox9_E11_Sample1_peak_1986	chr1	135918878	135919333	+	76	NA	promoter-TSS (ENSMUST00000163260.7)	protein_coding-promoter-TSS (ENSMUST00000163260.7)	15	ENSMUST00000163260.7	ENSMUSG00000026413	ENSMUST00000163260			Pkp1			protein_coding
Sox9_E11_Sample1_peak_1987	chr1	135945013	135945915	+	114	NA	Intergenic	Intergenic	17676	ENSMUST00000140703.7	ENSMUSG00000051985	ENSMUST00000166193			Igfn1			protein_coding
Sox9_E11_Sample1_peak_1988	chr1	136007455	136008323	+	251	NA	promoter-TSS (ENSMUST00000165125.7)	protein_coding-promoter-TSS (ENSMUST00000165125.7)	-261	ENSMUST00000165125.7	ENSMUSG00000026411	ENSMUST00000165125			Tmem9			protein_coding
Sox9_E11_Sample1_peak_1989	chr1	136017828	136019084	+	347	NA	intron (ENSMUST00000117950.1, intron 1 of 5)	protein_coding-intron (ENSMUST00000063719.14, intron 1 of 5)	394	ENSMUST00000117950.1	ENSMUSG00000026411	ENSMUST00000165125			Tmem9			protein_coding
Sox9_E11_Sample1_peak_1990	chr1	136040342	136041279	+	172	NA	Intergenic	Intergenic	7556	ENSMUST00000140545.1	ENSMUSG00000026411	ENSMUST00000165125			Tmem9			protein_coding
Sox9_E11_Sample1_peak_1991	chr1	136050855	136051746	+	167	NA	TTS (ENSMUST00000180436.1)	protein_coding-TTS (ENSMUST00000180436.1)	496	ENSMUST00000180436.1	ENSMUSG00000097918	ENSMUST00000180436			Ascl5			protein_coding
Sox9_E11_Sample1_peak_1992	chr1	136130988	136132112	+	272	NA	promoter-TSS (ENSMUST00000122892.1)	protein_coding-promoter-TSS (ENSMUST00000122892.1)	96	ENSMUST00000122892.1	ENSMUSG00000041642	ENSMUST00000122892			Kif21b			protein_coding
Sox9_E11_Sample1_peak_1993	chr1	136140068	136140624	+	344	NA	intron (ENSMUST00000075164.10, intron 1 of 34)	protein_coding-intron (ENSMUST00000075164.10, intron 1 of 34)	8892	ENSMUST00000122892.1	ENSMUSG00000041642	ENSMUST00000122892			Kif21b			protein_coding
Sox9_E11_Sample1_peak_1994	chr1	136174121	136175430	+	136	NA	exon (ENSMUST00000075164.10, exon 35 of 35)	protein_coding-exon (ENSMUST00000075164.10, exon 35 of 35)	5461	ENSMUST00000165333.1	ENSMUSG00000041642	ENSMUST00000122892			Kif21b			protein_coding
Sox9_E11_Sample1_peak_1995	chr1	136219912	136220833	+	134	NA	TTS (ENSMUST00000144464.6)	protein_coding-TTS (ENSMUST00000144464.6)	4298	ENSMUST00000180496.1	ENSMUSG00000097315	ENSMUST00000180496			Gm26568			lncRNA
Sox9_E11_Sample1_peak_1996	chr1	136231921	136232618	+	42	NA	intron (ENSMUST00000120339.7, intron 1 of 9)	protein_coding-intron (ENSMUST00000120339.7, intron 1 of 9)	1850	ENSMUST00000153910.1	ENSMUSG00000041605	ENSMUST00000150163			Inava			protein_coding
Sox9_E11_Sample1_peak_1997	chr1	136233683	136234590	+	201	NA	promoter-TSS (ENSMUST00000153910.1)	protein_coding-promoter-TSS (ENSMUST00000153910.1)	-17	ENSMUST00000153910.1	ENSMUSG00000041605	ENSMUST00000150163			Inava			protein_coding
Sox9_E11_Sample1_peak_1998	chr1	136259818	136260832	+	154	NA	exon (ENSMUST00000086395.6, exon 1 of 1)	protein_coding-exon (ENSMUST00000086395.6, exon 1 of 1)	548	ENSMUST00000086395.6	ENSMUSG00000052759	ENSMUST00000086395			Gpr25			protein_coding
Sox9_E11_Sample1_peak_2000	chr1	136344997	136346595	+	388	NA	promoter-TSS (ENSMUST00000192001.5)	protein_coding-promoter-TSS (ENSMUST00000192001.5)	-98	ENSMUST00000192001.5	ENSMUSG00000041570	ENSMUST00000192001			Camsap2			protein_coding
Sox9_E11_Sample1_peak_2001	chr1	136351257	136351904	+	69	NA	Intergenic	Intergenic	-5476	ENSMUST00000048309.11	ENSMUSG00000041570	ENSMUST00000192001			Camsap2			protein_coding
Sox9_E11_Sample1_peak_2002	chr1	136414914	136415676	+	554	NA	promoter-TSS (ENSMUST00000027655.7)	protein_coding-promoter-TSS (ENSMUST00000027655.7)	24	ENSMUST00000027655.7	ENSMUSG00000026404	ENSMUST00000149783			Ddx59			protein_coding
Sox9_E11_Sample1_peak_2003	chr1	136466125	136466857	+	476	NA	intron (ENSMUST00000187963.6, intron 1 of 14)	protein_coding-intron (ENSMUST00000187963.6, intron 1 of 14)	148	ENSMUST00000187963.6	ENSMUSG00000041498	ENSMUST00000189413			Kif14			protein_coding
Sox9_E11_Sample1_peak_2004	chr1	136525088	136525863	+	86	NA	intron (ENSMUST00000189413.6, intron 26 of 28)	protein_coding-intron (ENSMUST00000047817.11, intron 27 of 29)	1591	ENSMUST00000190220.1	ENSMUSG00000101413	ENSMUST00000190220			Gm29485			processed_pseudogene
Sox9_E11_Sample1_peak_2005	chr1	136541697	136542270	+	97	NA	intron (ENSMUST00000194018.1, intron 1 of 4)	lncRNA-intron (ENSMUST00000194018.1, intron 1 of 4)	378	ENSMUST00000194018.1	ENSMUSG00000104414	ENSMUST00000194018			Gm37799			lncRNA
Sox9_E11_Sample1_peak_2006	chr1	136551127	136551578	+	68	NA	intron (ENSMUST00000194018.1, intron 3 of 4)	lncRNA-intron (ENSMUST00000194018.1, intron 3 of 4)	9747	ENSMUST00000194018.1	ENSMUSG00000104414	ENSMUST00000194018			Gm37799			lncRNA
Sox9_E11_Sample1_peak_2007	chr1	136561668	136562656	+	182	NA	Intergenic	Intergenic	17315	ENSMUST00000193724.1	ENSMUSG00000104509	ENSMUST00000193724			Gm33994			lncRNA
Sox9_E11_Sample1_peak_2009	chr1	136605575	136606510	+	102	NA	promoter-TSS (ENSMUST00000193674.1)	lncRNA-promoter-TSS (ENSMUST00000193674.1)	-574	ENSMUST00000193674.1	ENSMUSG00000104366	ENSMUST00000193674			4933409D19Rik			lncRNA
Sox9_E11_Sample1_peak_2010	chr1	136614604	136615539	+	98	NA	Intergenic	Intergenic	9579	ENSMUST00000180797.1	ENSMUSG00000097229	ENSMUST00000180797			Platr23			lncRNA
Sox9_E11_Sample1_peak_2011	chr1	136624291	136625658	+	369	NA	promoter-TSS (ENSMUST00000047734.14)	protein_coding-promoter-TSS (ENSMUST00000047734.14)	73	ENSMUST00000112046.1	ENSMUSG00000041483	ENSMUST00000112046			Zfp281			protein_coding
Sox9_E11_Sample1_peak_2012	chr1	136653741	136654503	+	26	NA	Intergenic	Intergenic	-16647	ENSMUST00000180495.7	ENSMUSG00000097113	ENSMUST00000181524			Gm19705			lncRNA
Sox9_E11_Sample1_peak_2013	chr1	136661495	136662148	+	103	NA	Intergenic	Intergenic	-8948	ENSMUST00000180495.7	ENSMUSG00000097113	ENSMUST00000181524			Gm19705			lncRNA
Sox9_E11_Sample1_peak_2014	chr1	136664953	136665489	+	57	NA	Intergenic	Intergenic	-5548	ENSMUST00000180495.7	ENSMUSG00000097113	ENSMUST00000181524			Gm19705			lncRNA
Sox9_E11_Sample1_peak_2015	chr1	136672004	136672667	+	56	NA	intron (ENSMUST00000180495.7, intron 1 of 4)	lncRNA-intron (ENSMUST00000180495.7, intron 1 of 4)	1566	ENSMUST00000180495.7	ENSMUSG00000097113	ENSMUST00000181524			Gm19705			lncRNA
Sox9_E11_Sample1_peak_2016	chr1	136678445	136679109	+	72	NA	intron (ENSMUST00000181491.1, intron 2 of 3)	lncRNA-intron (ENSMUST00000180495.7, intron 3 of 4)	2304	ENSMUST00000181491.1	ENSMUSG00000097113	ENSMUST00000181524			Gm19705			lncRNA
Sox9_E11_Sample1_peak_2018	chr1	136717677	136718486	+	184	NA	intron (ENSMUST00000181274.1, intron 2 of 4)	lncRNA-intron (ENSMUST00000181274.1, intron 2 of 4)	20707	ENSMUST00000175171.1	ENSMUSG00000092912	ENSMUST00000175171			Gm24086			snRNA
Sox9_E11_Sample1_peak_2019	chr1	136768790	136769210	+	68	NA	Intergenic	Intergenic	-11391	ENSMUST00000175316.2	ENSMUSG00000096432	ENSMUST00000175316			Gm22132			miRNA
Sox9_E11_Sample1_peak_2020	chr1	136781931	136782569	+	128	NA	Intergenic	Intergenic	7270	ENSMUST00000193486.1	ENSMUSG00000104360	ENSMUST00000193486			Gm8762			processed_pseudogene
Sox9_E11_Sample1_peak_2021	chr1	136832681	136833092	+	32	NA	Intergenic	Intergenic	-33927	ENSMUST00000195232.1	ENSMUSG00000104261	ENSMUST00000195232			Gm17781			processed_pseudogene
Sox9_E11_Sample1_peak_2023	chr1	136890594	136891235	+	61	NA	intron (ENSMUST00000027649.13, intron 6 of 8)	protein_coding-intron (ENSMUST00000027649.13, intron 6 of 8)	49669	ENSMUST00000192587.1	ENSMUSG00000026398	ENSMUST00000192357			Nr5a2			protein_coding
Sox9_E11_Sample1_peak_2024	chr1	136948396	136949173	+	65	NA	exon (ENSMUST00000027649.13, exon 3 of 9)	protein_coding-exon (ENSMUST00000027649.13, exon 3 of 9)	389	ENSMUST00000195428.1	ENSMUSG00000026398	ENSMUST00000192357			Nr5a2			protein_coding
Sox9_E11_Sample1_peak_2026	chr1	136966387	136967131	+	53	NA	Intergenic	Intergenic	-6311	ENSMUST00000027649.13	ENSMUSG00000026398	ENSMUST00000192357			Nr5a2			protein_coding
Sox9_E11_Sample1_peak_2027	chr1	136980276	136980913	+	68	NA	Intergenic	Intergenic	9676	ENSMUST00000158345.1	ENSMUSG00000088970	ENSMUST00000158345			Gm23763			snRNA
Sox9_E11_Sample1_peak_2028	chr1	137079078	137080026	+	131	NA	Intergenic	Intergenic	-89282	ENSMUST00000158345.1	ENSMUSG00000088970	ENSMUST00000158345			Gm23763			snRNA
Sox9_E11_Sample1_peak_2030	chr1	137221522	137221924	+	50	NA	Intergenic	Intergenic	-6076	ENSMUST00000104019.1	ENSMUSG00000077207	ENSMUST00000104019			Gm25609			snRNA
Sox9_E11_Sample1_peak_2032	chr1	137280546	137281444	+	90	NA	Intergenic	Intergenic	28853	ENSMUST00000192624.1	ENSMUSG00000102751	ENSMUST00000192624			Gm37057			TEC
Sox9_E11_Sample1_peak_2033	chr1	137323264	137324427	+	299	NA	Intergenic	Intergenic	1997	ENSMUST00000191810.1	ENSMUSG00000102738	ENSMUST00000191810			1700006P03Rik			TEC
Sox9_E11_Sample1_peak_2034	chr1	137473982	137475122	+	184	NA	Intergenic	Intergenic	56678	ENSMUST00000192122.1	ENSMUSG00000103070	ENSMUST00000192122			Gm37903			TEC
Sox9_E11_Sample1_peak_2036	chr1	137654144	137655012	+	50	NA	Intergenic	Intergenic	-79740	ENSMUST00000158090.1	ENSMUSG00000088715	ENSMUST00000158090			Gm22727			snoRNA
Sox9_E11_Sample1_peak_2037	chr1	137849463	137849898	+	46	NA	Intergenic	Intergenic	37831	ENSMUST00000191658.1	ENSMUSG00000104112	ENSMUST00000191658			Gm37293			TEC
Sox9_E11_Sample1_peak_2038	chr1	137898556	137899110	+	330	NA	exon (ENSMUST00000187561.1, exon 1 of 1)	lncRNA-exon (ENSMUST00000187561.1, exon 1 of 1)	235	ENSMUST00000182127.1	ENSMUSG00000098243	ENSMUST00000187561			Gm4258			lncRNA
Sox9_E11_Sample1_peak_2038-2	chr1	137899532	137901093	+	330	NA	TTS (ENSMUST00000187561.1)	lncRNA-TTS (ENSMUST00000187561.1)	1714	ENSMUST00000182127.1	ENSMUSG00000098243	ENSMUST00000187561			Gm4258			lncRNA
Sox9_E11_Sample1_peak_2039	chr1	137919866	137920420	+	236	NA	intron (ENSMUST00000182971.1, intron 1 of 1)	lncRNA-intron (ENSMUST00000182127.1, intron 1 of 2)	1169	ENSMUST00000182971.1	ENSMUSG00000098045	ENSMUST00000182971			Gm26979			lncRNA
Sox9_E11_Sample1_peak_2042	chr1	138029023	138029633	+	68	NA	Intergenic	Intergenic	-41552	ENSMUST00000157939.1	ENSMUSG00000088564	ENSMUST00000157939			Gm23782			rRNA
Sox9_E11_Sample1_peak_2044	chr1	138328008	138328815	+	60	NA	Intergenic	Intergenic	-48853	ENSMUST00000190286.1	ENSMUSG00000101793	ENSMUST00000190286			Gm28500			processed_pseudogene
Sox9_E11_Sample1_peak_2045	chr1	138448898	138449885	+	72	NA	Intergenic	Intergenic	-66224	ENSMUST00000188729.2	ENSMUSG00000099510	ENSMUST00000188729			Gm28501			lncRNA
Sox9_E11_Sample1_peak_2047	chr1	138507206	138508208	+	76	NA	intron (ENSMUST00000186017.6, intron 7 of 9)	protein_coding-intron (ENSMUST00000027642.4, intron 7 of 7)	-7908	ENSMUST00000188729.2	ENSMUSG00000099510	ENSMUST00000188729			Gm28501			lncRNA
Sox9_E11_Sample1_peak_2048	chr1	138513841	138514595	+	139	NA	exon (ENSMUST00000191549.2, exon 7 of 7)	protein_coding-exon (ENSMUST00000191549.2, exon 7 of 7)	-1397	ENSMUST00000188729.2	ENSMUSG00000099510	ENSMUST00000188729			Gm28501			lncRNA
Sox9_E11_Sample1_peak_2049	chr1	138571343	138572335	+	258	NA	promoter-TSS (ENSMUST00000191656.1)	TEC-promoter-TSS (ENSMUST00000191656.1)	-483	ENSMUST00000191656.1	ENSMUSG00000102448	ENSMUST00000191656			Gm37101			TEC
Sox9_E11_Sample1_peak_2050	chr1	138587469	138588022	+	49	NA	intron (ENSMUST00000187407.6, intron 1 of 9)	protein_coding-intron (ENSMUST00000027642.4, intron 1 of 7)	-16389	ENSMUST00000191656.1	ENSMUSG00000102448	ENSMUST00000191656			Gm37101			TEC
Sox9_E11_Sample1_peak_2051	chr1	138617457	138620252	+	677	NA	intron (ENSMUST00000187407.6, intron 1 of 9)	protein_coding-intron (ENSMUST00000027642.4, intron 1 of 7)	820	ENSMUST00000027642.4	ENSMUSG00000026393	ENSMUST00000187407			Nek7			protein_coding
Sox9_E11_Sample1_peak_2052	chr1	138766821	138767333	+	39	NA	Intergenic	Intergenic	66582	ENSMUST00000192425.1	ENSMUSG00000019230	ENSMUST00000112030			Lhx9			protein_coding
Sox9_E11_Sample1_peak_2053	chr1	138801548	138802625	+	158	NA	Intergenic	Intergenic	31573	ENSMUST00000192425.1	ENSMUSG00000019230	ENSMUST00000112030			Lhx9			protein_coding
Sox9_E11_Sample1_peak_2054	chr1	138841355	138842078	+	93	NA	intron (ENSMUST00000019374.13, intron 1 of 4)	protein_coding-intron (ENSMUST00000019374.13, intron 1 of 4)	713	ENSMUST00000112026.3	ENSMUSG00000019230	ENSMUST00000112030			Lhx9			protein_coding
Sox9_E11_Sample1_peak_2055	chr1	138848042	138849033	+	67	NA	promoter-TSS (ENSMUST00000046870.12)	protein_coding-promoter-TSS (ENSMUST00000046870.12)	40	ENSMUST00000112030.8	ENSMUSG00000019230	ENSMUST00000112030			Lhx9			protein_coding
Sox9_E11_Sample1_peak_2056	chr1	138856105	138856963	+	808	NA	exon (ENSMUST00000193374.1, exon 1 of 3)	protein_coding-exon (ENSMUST00000193374.1, exon 1 of 3)	313	ENSMUST00000193374.1	ENSMUSG00000079283	ENSMUST00000195075			2310009B15Rik			protein_coding
Sox9_E11_Sample1_peak_2057	chr1	138912184	138913080	+	60	NA	Intergenic	Intergenic	3411	ENSMUST00000195391.1	ENSMUSG00000103850	ENSMUST00000195391			Gm3933			processed_pseudogene
Sox9_E11_Sample1_peak_2058	chr1	138928864	138930322	+	46	NA	Intergenic	Intergenic	-13550	ENSMUST00000195391.1	ENSMUSG00000103850	ENSMUST00000195391			Gm3933			processed_pseudogene
Sox9_E11_Sample1_peak_2059	chr1	138963073	138964334	+	440	NA	promoter-TSS (ENSMUST00000168527.7)	protein_coding-promoter-TSS (ENSMUST00000168527.7)	-6	ENSMUST00000168527.7	ENSMUSG00000056268	ENSMUST00000094505			Dennd1b			protein_coding
Sox9_E11_Sample1_peak_2060	chr1	139128094	139128892	+	87	NA	intron (ENSMUST00000199634.1, intron 2 of 9)	protein_coding-intron (ENSMUST00000094505.5, intron 13 of 20)	6172	ENSMUST00000129972.1	ENSMUSG00000085481	ENSMUST00000129972			Gm16304			processed_pseudogene
Sox9_E11_Sample1_peak_2061	chr1	139159577	139160299	+	80	NA	intron (ENSMUST00000200429.4, intron 17 of 19)	protein_coding-intron (ENSMUST00000094505.5, intron 18 of 20)	4786	ENSMUST00000191655.1	ENSMUSG00000102243	ENSMUST00000191655			Gm37718			TEC
Sox9_E11_Sample1_peak_2062	chr1	139212270	139212998	+	80	NA	intron (ENSMUST00000059825.11, intron 11 of 11)	protein_coding-intron (ENSMUST00000059825.11, intron 11 of 11)	-10348	ENSMUST00000199479.1	ENSMUSG00000063681	ENSMUST00000197035			Crb1			protein_coding
Sox9_E11_Sample1_peak_2063	chr1	139267997	139268431	+	46	NA	intron (ENSMUST00000198445.4, intron 4 of 9)	protein_coding-intron (ENSMUST00000059825.11, intron 5 of 11)	-12452	ENSMUST00000199291.1	ENSMUSG00000063681	ENSMUST00000197035			Crb1			protein_coding
Sox9_E11_Sample1_peak_2064	chr1	139379254	139379674	+	46	NA	promoter-TSS (ENSMUST00000192824.1)	lncRNA-promoter-TSS (ENSMUST00000192824.1)	12	ENSMUST00000192824.1	ENSMUSG00000103844	ENSMUST00000192824			4933436E23Rik			lncRNA
Sox9_E11_Sample1_peak_2065	chr1	139421711	139423270	+	542	NA	intron (ENSMUST00000039867.9, intron 1 of 10)	protein_coding-intron (ENSMUST00000039867.9, intron 1 of 10)	108	ENSMUST00000039867.9	ENSMUSG00000033964	ENSMUST00000039867			Zbtb41			protein_coding
Sox9_E11_Sample1_peak_2067	chr1	139454176	139455480	+	620	NA	promoter-TSS (ENSMUST00000053364.11)	protein_coding-promoter-TSS (ENSMUST00000053364.11)	9	ENSMUST00000197096.1	ENSMUSG00000033952	ENSMUST00000200083			Aspm			protein_coding
Sox9_E11_Sample1_peak_2068	chr1	140070707	140071240	+	20	NA	Intergenic	Intergenic	-21944	ENSMUST00000195133.1	ENSMUSG00000103691	ENSMUST00000195133			Gm38019			processed_pseudogene
Sox9_E11_Sample1_peak_2069	chr1	140245170	140246444	+	386	NA	promoter-TSS (ENSMUST00000119786.7)	protein_coding-promoter-TSS (ENSMUST00000119786.7)	-351	ENSMUST00000120709.7	ENSMUSG00000052726	ENSMUST00000120796			Kcnt2			protein_coding
Sox9_E11_Sample1_peak_2070	chr1	140661184	140661796	+	63	NA	Intergenic	Intergenic	-5086	ENSMUST00000193820.1	ENSMUSG00000102368	ENSMUST00000193820			4930590L20Rik			lncRNA
Sox9_E11_Sample1_peak_2071	chr1	141296697	141297563	+	153	NA	promoter-TSS (ENSMUST00000179509.1)	snRNA-promoter-TSS (ENSMUST00000179509.1)	-970	ENSMUST00000179509.1	ENSMUSG00000093879	ENSMUST00000179509			Gm25457			snRNA
Sox9_E11_Sample1_peak_2072	chr1	142007936	142008524	+	32	NA	Intergenic	Intergenic	447584	ENSMUST00000191024.2	ENSMUSG00000099671	ENSMUST00000191024			Gm18183			processed_pseudogene
Sox9_E11_Sample1_peak_2073	chr1	142063808	142064563	+	94	NA	Intergenic	Intergenic	391629	ENSMUST00000191024.2	ENSMUSG00000099671	ENSMUST00000191024			Gm18183			processed_pseudogene
Sox9_E11_Sample1_peak_2074	chr1	142108737	142109657	+	204	NA	Intergenic	Intergenic	346617	ENSMUST00000191024.2	ENSMUSG00000099671	ENSMUST00000191024			Gm18183			processed_pseudogene
Sox9_E11_Sample1_peak_2075	chr1	142742164	142742713	+	68	NA	Intergenic	Intergenic	-12755	ENSMUST00000195327.1	ENSMUSG00000102818	ENSMUST00000195327			Gm37796			TEC
Sox9_E11_Sample1_peak_2077	chr1	143644477	143644670	+	26	NA	intron (ENSMUST00000038252.3, intron 1 of 1)	protein_coding-intron (ENSMUST00000018337.8, intron 10 of 16)	-2048	ENSMUST00000189597.1	ENSMUSG00000026361	ENSMUST00000188838			Cdc73			protein_coding
Sox9_E11_Sample1_peak_2079	chr1	143702102	143703507	+	592	NA	promoter-TSS (ENSMUST00000018337.8)	protein_coding-promoter-TSS (ENSMUST00000018337.8)	89	ENSMUST00000018337.8	ENSMUSG00000026361	ENSMUST00000188838			Cdc73			protein_coding
Sox9_E11_Sample1_peak_2080	chr1	143709181	143710439	+	244	NA	Intergenic	Intergenic	-6528	ENSMUST00000185367.1	ENSMUSG00000018196	ENSMUST00000190211			Glrx2			protein_coding
Sox9_E11_Sample1_peak_2081	chr1	143727464	143728335	+	342	NA	intron (ENSMUST00000185367.1, intron 5 of 9)	protein_coding-intron (ENSMUST00000185367.1, intron 5 of 9)	-11130	ENSMUST00000145969.7	ENSMUSG00000018196	ENSMUST00000190211			Glrx2			protein_coding
Sox9_E11_Sample1_peak_2082	chr1	143739021	143740346	+	607	NA	promoter-TSS (ENSMUST00000050491.10)	protein_coding-promoter-TSS (ENSMUST00000050491.10)	37	ENSMUST00000050491.10	ENSMUSG00000018196	ENSMUST00000190211			Glrx2			protein_coding
Sox9_E11_Sample1_peak_2083	chr1	143770330	143770973	+	111	NA	exon (ENSMUST00000018343.9, exon 1 of 7)	protein_coding-exon (ENSMUST00000018343.9, exon 1 of 7)	375	ENSMUST00000018343.9	ENSMUSG00000018199	ENSMUST00000018343			Ro60			protein_coding
Sox9_E11_Sample1_peak_2084	chr1	143776583	143777939	+	709	NA	promoter-TSS (ENSMUST00000018333.12)	protein_coding-promoter-TSS (ENSMUST00000018333.12)	-11	ENSMUST00000189936.6	ENSMUSG00000018189	ENSMUST00000190258			Uchl5			protein_coding
Sox9_E11_Sample1_peak_2085	chr1	143813867	143814348	+	73	NA	Intergenic	Intergenic	19390	ENSMUST00000185539.1	ENSMUSG00000018189	ENSMUST00000190258			Uchl5			protein_coding
Sox9_E11_Sample1_peak_2086	chr1	143819764	143820902	+	104	NA	Intergenic	Intergenic	25616	ENSMUST00000185539.1	ENSMUSG00000018189	ENSMUST00000190258			Uchl5			protein_coding
Sox9_E11_Sample1_peak_2087	chr1	143881046	143881648	+	72	NA	Intergenic	Intergenic	86630	ENSMUST00000185539.1	ENSMUSG00000018189	ENSMUST00000190258			Uchl5			protein_coding
Sox9_E11_Sample1_peak_2088	chr1	144003515	144005049	+	470	NA	promoter-TSS (ENSMUST00000027606.3)	protein_coding-promoter-TSS (ENSMUST00000027606.3)	-121	ENSMUST00000127206.7	ENSMUSG00000026360	ENSMUST00000027606			Rgs2			protein_coding
Sox9_E11_Sample1_peak_2090	chr1	144116054	144116474	+	32	NA	Intergenic	Intergenic	61011	ENSMUST00000111941.1	ENSMUSG00000051079	ENSMUST00000052375			Rgs13			protein_coding
Sox9_E11_Sample1_peak_2091	chr1	144406352	144407287	+	90	NA	Intergenic	Intergenic	-94383	ENSMUST00000187999.1	ENSMUSG00000100441	ENSMUST00000187999			Gm7266			processed_pseudogene
Sox9_E11_Sample1_peak_2093	chr1	145018906	145019564	+	46	NA	Intergenic	Intergenic	-39650	ENSMUST00000177687.1	ENSMUSG00000096352	ENSMUST00000177687			Gm25708			miRNA
Sox9_E11_Sample1_peak_2094	chr1	145570070	145570764	+	60	NA	Intergenic	Intergenic	-243726	ENSMUST00000194549.1	ENSMUSG00000103055	ENSMUST00000194549			Gm38269			TEC
Sox9_E11_Sample1_peak_2095	chr1	146442674	146443212	+	39	NA	intron (ENSMUST00000186665.6, intron 2 of 6)	lncRNA-intron (ENSMUST00000185686.1, intron 1 of 3)	22507	ENSMUST00000163646.2	ENSMUSG00000090323	ENSMUST00000163646			Gm5263			processed_pseudogene
Sox9_E11_Sample1_peak_2096	chr1	146497442	146498913	+	322	NA	intron (ENSMUST00000125331.1, intron 1 of 2)	protein_coding-intron (ENSMUST00000074622.10, intron 1 of 7)	439	ENSMUST00000125331.1	ENSMUSG00000035131	ENSMUST00000132847			Brinp3			protein_coding
Sox9_E11_Sample1_peak_2099	chr1	147491106	147491637	+	26	NA	Intergenic	Intergenic	14671	ENSMUST00000188981.1	ENSMUSG00000100380	ENSMUST00000188981			Gm17867			unprocessed_pseudogene
Sox9_E11_Sample1_peak_2103	chr1	149617375	149617858	+	46	NA	Intergenic	Intergenic	89866	ENSMUST00000157542.1	ENSMUSG00000088167	ENSMUST00000157542			Gm23535			snRNA
Sox9_E11_Sample1_peak_2104	chr1	149712550	149713106	+	208	NA	Intergenic	Intergenic	-5346	ENSMUST00000157542.1	ENSMUSG00000088167	ENSMUST00000157542			Gm23535			snRNA
Sox9_E11_Sample1_peak_2105	chr1	149713765	149714256	+	26	NA	Intergenic	Intergenic	-6528	ENSMUST00000157542.1	ENSMUSG00000088167	ENSMUST00000157542			Gm23535			snRNA
Sox9_E11_Sample1_peak_2106	chr1	149758240	149758643	+	68	NA	Intergenic	Intergenic	-23583	ENSMUST00000122583.1	ENSMUSG00000084532	ENSMUST00000122583			n-R5s218			rRNA
Sox9_E11_Sample1_peak_2107	chr1	149913028	149913712	+	152	NA	intron (ENSMUST00000190507.1, intron 2 of 5)	protein_coding-intron (ENSMUST00000070200.14, intron 3 of 17)	9069	ENSMUST00000111926.8	ENSMUSG00000056220	ENSMUST00000155438			Pla2g4a			protein_coding
Sox9_E11_Sample1_peak_2108	chr1	149921245	149922710	+	238	NA	exon (ENSMUST00000142040.1, exon 3 of 3)	protein_coding-exon (ENSMUST00000142040.1, exon 3 of 3)	462	ENSMUST00000111926.8	ENSMUSG00000056220	ENSMUST00000155438			Pla2g4a			protein_coding
Sox9_E11_Sample1_peak_2109	chr1	149960669	149961682	+	278	NA	promoter-TSS (ENSMUST00000134676.1)	protein_coding-promoter-TSS (ENSMUST00000134676.1)	80	ENSMUST00000134676.1	ENSMUSG00000056220	ENSMUST00000155438			Pla2g4a			protein_coding
Sox9_E11_Sample1_peak_2110	chr1	150099408	150100369	+	359	NA	promoter-TSS (ENSMUST00000035065.8)	protein_coding-promoter-TSS (ENSMUST00000035065.8)	-71	ENSMUST00000181915.1	ENSMUSG00000097028	ENSMUST00000181915			Ptgs2os			lncRNA
Sox9_E11_Sample1_peak_2111	chr1	150115351	150115737	+	39	NA	Intergenic	Intergenic	15212	ENSMUST00000190784.1	ENSMUSG00000032487	ENSMUST00000190784			Ptgs2			protein_coding
Sox9_E11_Sample1_peak_2113	chr1	150266452	150267002	+	173	NA	promoter-TSS (ENSMUST00000121422.1)	processed_pseudogene-promoter-TSS (ENSMUST00000121422.1)	-728	ENSMUST00000121422.1	ENSMUSG00000099875	ENSMUST00000121422			Rbm3-ps			processed_pseudogene
Sox9_E11_Sample1_peak_2114	chr1	150392514	150394010	+	790	NA	promoter-TSS (ENSMUST00000006167.12)	protein_coding-promoter-TSS (ENSMUST00000006167.12)	12	ENSMUST00000119161.8	ENSMUSG00000006005	ENSMUST00000150752			Tpr			protein_coding
Sox9_E11_Sample1_peak_2116-2	chr1	150536209	150536464	+	81	NA	Intergenic	Intergenic	-12981	ENSMUST00000186208.1	ENSMUSG00000101519	ENSMUST00000186208			Ska2l-ps			processed_pseudogene
Sox9_E11_Sample1_peak_2116	chr1	150537363	150538180	+	81	NA	Intergenic	Intergenic	-11546	ENSMUST00000186208.1	ENSMUSG00000101519	ENSMUST00000186208			Ska2l-ps			processed_pseudogene
Sox9_E11_Sample1_peak_2117	chr1	150770993	150771501	+	85	NA	intron (ENSMUST00000137197.8, intron 13 of 105)	protein_coding-intron (ENSMUST00000074783.11, intron 13 of 106)	145948	ENSMUST00000177268.1	ENSMUSG00000093650	ENSMUST00000177239			Gm20631			lncRNA
Sox9_E11_Sample1_peak_2118	chr1	150804152	150804991	+	76	NA	intron (ENSMUST00000074783.11, intron 9 of 106)	protein_coding-intron (ENSMUST00000074783.11, intron 9 of 106)	179272	ENSMUST00000177268.1	ENSMUSG00000093650	ENSMUST00000177239			Gm20631			lncRNA
Sox9_E11_Sample1_peak_2119	chr1	150827137	150827627	+	20	NA	intron (ENSMUST00000137197.8, intron 4 of 105)	protein_coding-intron (ENSMUST00000074783.11, intron 4 of 106)	165669	ENSMUST00000137197.8	ENSMUSG00000066842	ENSMUST00000137909			Hmcn1			protein_coding
Sox9_E11_Sample1_peak_2121	chr1	150897802	150898543	+	288	NA	intron (ENSMUST00000074783.11, intron 1 of 106)	protein_coding-intron (ENSMUST00000074783.11, intron 1 of 106)	94879	ENSMUST00000137197.8	ENSMUSG00000066842	ENSMUST00000137909			Hmcn1			protein_coding
Sox9_E11_Sample1_peak_2123	chr1	150991954	150993833	+	299	NA	exon (ENSMUST00000074783.11, exon 1 of 107)	protein_coding-exon (ENSMUST00000074783.11, exon 1 of 107)	158	ENSMUST00000137197.8	ENSMUSG00000066842	ENSMUST00000137909			Hmcn1			protein_coding
Sox9_E11_Sample1_peak_2124	chr1	151000390	151001663	+	107	NA	promoter-TSS (ENSMUST00000191173.1)	lncRNA-promoter-TSS (ENSMUST00000191173.1)	-14	ENSMUST00000191173.1	ENSMUSG00000099622	ENSMUST00000191173			Gm29188			lncRNA
Sox9_E11_Sample1_peak_2125	chr1	151009368	151009854	+	53	NA	Intergenic	Intergenic	8571	ENSMUST00000191173.1	ENSMUSG00000099622	ENSMUST00000191173			Gm29188			lncRNA
Sox9_E11_Sample1_peak_2126	chr1	151024468	151025694	+	197	NA	Intergenic	Intergenic	24041	ENSMUST00000191173.1	ENSMUSG00000099622	ENSMUST00000191173			Gm29188			lncRNA
Sox9_E11_Sample1_peak_2127	chr1	151064487	151065941	+	176	NA	Intergenic	Intergenic	-3104	ENSMUST00000180118.1	ENSMUSG00000096851	ENSMUST00000180118			Gm22756			snRNA
Sox9_E11_Sample1_peak_2129	chr1	151129958	151130406	+	49	NA	Intergenic	Intergenic	-6325	ENSMUST00000181451.1	ENSMUSG00000097426	ENSMUST00000181451			Gm8941			processed_pseudogene
Sox9_E11_Sample1_peak_2129-2	chr1	151131345	151131979	+	49	NA	Intergenic	Intergenic	-4845	ENSMUST00000181451.1	ENSMUSG00000097426	ENSMUST00000181451			Gm8941			processed_pseudogene
Sox9_E11_Sample1_peak_2130	chr1	151144252	151145249	+	133	NA	Intergenic	Intergenic	6716	ENSMUST00000188305.1	ENSMUSG00000102095	ENSMUST00000188305			C730036E19Rik			lncRNA
Sox9_E11_Sample1_peak_2131	chr1	151167522	151168481	+	39	NA	Intergenic	Intergenic	-14536	ENSMUST00000225278.1	ENSMUSG00000114212	ENSMUST00000225278			Gm47985			protein_coding
Sox9_E11_Sample1_peak_2132	chr1	151177217	151178278	+	258	NA	Intergenic	Intergenic	-4790	ENSMUST00000225278.1	ENSMUSG00000114212	ENSMUST00000225278			Gm47985			protein_coding
Sox9_E11_Sample1_peak_2133	chr1	151235645	151236521	+	126	NA	Intergenic	Intergenic	24831	ENSMUST00000157873.1	ENSMUSG00000088498	ENSMUST00000157873			Gm24402			snRNA
Sox9_E11_Sample1_peak_2134	chr1	151251561	151253036	+	178	NA	Intergenic	Intergenic	8616	ENSMUST00000157873.1	ENSMUSG00000088498	ENSMUST00000157873			Gm24402			snRNA
Sox9_E11_Sample1_peak_2135	chr1	151258159	151259456	+	76	NA	Intergenic	Intergenic	2107	ENSMUST00000157873.1	ENSMUSG00000088498	ENSMUST00000157873			Gm24402			snRNA
Sox9_E11_Sample1_peak_2138	chr1	151343724	151345363	+	492	NA	promoter-TSS (ENSMUST00000023918.12)	protein_coding-promoter-TSS (ENSMUST00000023918.12)	25	ENSMUST00000097543.7	ENSMUSG00000023150	ENSMUST00000190872			Ivns1abp			protein_coding
Sox9_E11_Sample1_peak_2139	chr1	151427146	151429125	+	473	NA	promoter-TSS (ENSMUST00000065625.11)	protein_coding-promoter-TSS (ENSMUST00000065625.11)	301	ENSMUST00000111883.8	ENSMUSG00000052748	ENSMUST00000139244			Swt1			protein_coding
Sox9_E11_Sample1_peak_2140	chr1	151500018	151501340	+	551	NA	intron (ENSMUST00000187048.6, intron 1 of 7)	protein_coding-intron (ENSMUST00000076110.10, intron 1 of 6)	115	ENSMUST00000187991.1	ENSMUSG00000026484	ENSMUST00000187991			Rnf2			protein_coding
Sox9_E11_Sample1_peak_2141	chr1	151571002	151572691	+	174	NA	intron (ENSMUST00000134499.7, intron 2 of 4)	protein_coding-intron (ENSMUST00000097541.9, intron 1 of 14)	350	ENSMUST00000111875.1	ENSMUSG00000026483	ENSMUST00000134499			Fam129a			protein_coding
Sox9_E11_Sample1_peak_2142	chr1	151591611	151592088	+	26	NA	intron (ENSMUST00000134499.7, intron 2 of 4)	protein_coding-intron (ENSMUST00000097541.9, intron 1 of 14)	20353	ENSMUST00000111875.1	ENSMUSG00000026483	ENSMUST00000134499			Fam129a			protein_coding
Sox9_E11_Sample1_peak_2144	chr1	151631235	151632294	+	148	NA	intron (ENSMUST00000134499.7, intron 2 of 4)	protein_coding-intron (ENSMUST00000097541.9, intron 1 of 14)	-45403	ENSMUST00000086267.5	ENSMUSG00000026483	ENSMUST00000134499			Fam129a			protein_coding
Sox9_E11_Sample1_peak_2145	chr1	151651209	151651642	+	60	NA	intron (ENSMUST00000148810.7, intron 5 of 13)	protein_coding-intron (ENSMUST00000097541.9, intron 5 of 14)	-25742	ENSMUST00000086267.5	ENSMUSG00000026483	ENSMUST00000134499			Fam129a			protein_coding
Sox9_E11_Sample1_peak_2146	chr1	151665082	151665591	+	120	NA	intron (ENSMUST00000148810.7, intron 5 of 13)	protein_coding-intron (ENSMUST00000097541.9, intron 5 of 14)	-11831	ENSMUST00000086267.5	ENSMUSG00000026483	ENSMUST00000134499			Fam129a			protein_coding
Sox9_E11_Sample1_peak_2149	chr1	151709165	151709602	+	90	NA	intron (ENSMUST00000086267.5, intron 8 of 9)	protein_coding-intron (ENSMUST00000086267.5, intron 8 of 9)	32216	ENSMUST00000086267.5	ENSMUSG00000026483	ENSMUST00000134499			Fam129a			protein_coding
Sox9_E11_Sample1_peak_2150	chr1	151727386	151728220	+	96	NA	Intergenic	Intergenic	27215	ENSMUST00000186444.1	ENSMUSG00000100594	ENSMUST00000186444			2810414N06Rik			lncRNA
Sox9_E11_Sample1_peak_2151	chr1	151754818	151756050	+	551	NA	promoter-TSS (ENSMUST00000059498.11)	protein_coding-promoter-TSS (ENSMUST00000059498.11)	-26	ENSMUST00000191070.1	ENSMUSG00000043019	ENSMUST00000188145			Edem3			protein_coding
Sox9_E11_Sample1_peak_2152	chr1	151861485	151862219	+	113	NA	intron (ENSMUST00000187603.6, intron 6 of 6)	protein_coding-intron (ENSMUST00000187603.6, intron 6 of 6)	-6897	ENSMUST00000122608.1	ENSMUSG00000084557	ENSMUST00000122608			Gm25279			snRNA
Sox9_E11_Sample1_peak_2154	chr1	152049734	152050245	+	34	NA	intron (ENSMUST00000187603.6, intron 1 of 6)	protein_coding-intron (ENSMUST00000044581.13, intron 1 of 5)	5303	ENSMUST00000121533.2	ENSMUSG00000032666	ENSMUST00000121533			1700025G04Rik			protein_coding
Sox9_E11_Sample1_peak_2156	chr1	152089569	152091160	+	233	NA	promoter-TSS (ENSMUST00000044581.13)	protein_coding-promoter-TSS (ENSMUST00000044581.13)	-239	ENSMUST00000044581.13	ENSMUSG00000032666	ENSMUST00000121533			1700025G04Rik			protein_coding
Sox9_E11_Sample1_peak_2158	chr1	152259450	152260067	+	34	NA	Intergenic	Intergenic	32770	ENSMUST00000194334.1	ENSMUSG00000103744	ENSMUST00000194334			Gm38238			TEC
Sox9_E11_Sample1_peak_2159	chr1	152386158	152387034	+	292	NA	promoter-TSS (ENSMUST00000015124.14)	protein_coding-promoter-TSS (ENSMUST00000015124.14)	-4	ENSMUST00000162371.1	ENSMUSG00000014980	ENSMUST00000188105			Tsen15			protein_coding
Sox9_E11_Sample1_peak_2160	chr1	152399850	152401156	+	296	NA	intron (ENSMUST00000127586.7, intron 1 of 13)	protein_coding-intron (ENSMUST00000044311.8, intron 1 of 11)	673	ENSMUST00000044311.8	ENSMUSG00000032649	ENSMUST00000044311			Colgalt2			protein_coding
Sox9_E11_Sample1_peak_2161	chr1	152456388	152456985	+	83	NA	intron (ENSMUST00000127586.7, intron 1 of 13)	protein_coding-intron (ENSMUST00000044311.8, intron 1 of 11)	-49161	ENSMUST00000121610.1	ENSMUSG00000080878	ENSMUST00000121610			Gm15618			processed_pseudogene
Sox9_E11_Sample1_peak_2162	chr1	152555983	152556822	+	235	NA	intron (ENSMUST00000111857.2, intron 5 of 17)	protein_coding-intron (ENSMUST00000027760.13, intron 5 of 17)	-3358	ENSMUST00000188395.1	ENSMUSG00000026482	ENSMUST00000027760			Rgl1			protein_coding
Sox9_E11_Sample1_peak_2163	chr1	152624138	152625605	+	200	NA	intron (ENSMUST00000111859.7, intron 2 of 18)	protein_coding-intron (ENSMUST00000111859.7, intron 2 of 18)	158	ENSMUST00000149536.2	ENSMUSG00000026482	ENSMUST00000027760			Rgl1			protein_coding
Sox9_E11_Sample1_peak_2164	chr1	152689732	152691334	+	167	NA	intron (ENSMUST00000111859.7, intron 1 of 18)	protein_coding-intron (ENSMUST00000111857.2, intron 1 of 17)	-3032	ENSMUST00000139309.1	ENSMUSG00000086145	ENSMUST00000139309			Gm15479			lncRNA
Sox9_E11_Sample1_peak_2166	chr1	152765963	152767266	+	256	NA	promoter-TSS (ENSMUST00000077755.10)	protein_coding-promoter-TSS (ENSMUST00000077755.10)	72	ENSMUST00000077755.10	ENSMUSG00000008475	ENSMUST00000097536			Arpc5			protein_coding
Sox9_E11_Sample1_peak_2167	chr1	152790394	152791593	+	370	NA	Intergenic	Intergenic	-9201	ENSMUST00000186568.6	ENSMUSG00000026480	ENSMUST00000186568			Ncf2			protein_coding
Sox9_E11_Sample1_peak_2168	chr1	152815257	152815732	+	105	NA	intron (ENSMUST00000186568.6, intron 3 of 15)	protein_coding-intron (ENSMUST00000027754.6, intron 2 of 14)	4604	ENSMUST00000189135.1	ENSMUSG00000026480	ENSMUST00000186568			Ncf2			protein_coding
Sox9_E11_Sample1_peak_2170	chr1	152829038	152829418	+	35	NA	intron (ENSMUST00000186568.6, intron 8 of 15)	protein_coding-intron (ENSMUST00000027754.6, intron 7 of 14)	5659	ENSMUST00000187235.1	ENSMUSG00000026480	ENSMUST00000186568			Ncf2			protein_coding
Sox9_E11_Sample1_peak_2171	chr1	152901892	152903902	+	289	NA	promoter-TSS (ENSMUST00000073441.12)	protein_coding-promoter-TSS (ENSMUST00000073441.12)	-251	ENSMUST00000111836.3	ENSMUSG00000042772	ENSMUST00000043560			Smg7			protein_coding
Sox9_E11_Sample1_peak_2172	chr1	152955311	152956448	+	76	NA	intron (ENSMUST00000185241.1, intron 1 of 4)	protein_coding-intron (ENSMUST00000043313.14, intron 1 of 10)	605	ENSMUST00000185241.1	ENSMUSG00000042751	ENSMUST00000043313			Nmnat2			protein_coding
Sox9_E11_Sample1_peak_2173	chr1	153040010	153040677	+	116	NA	intron (ENSMUST00000187569.1, intron 1 of 1)	protein_coding-intron (ENSMUST00000043313.14, intron 1 of 10)	6969	ENSMUST00000187569.1	ENSMUSG00000042751	ENSMUST00000043313			Nmnat2			protein_coding
Sox9_E11_Sample1_peak_2174	chr1	153072295	153072493	+	42	NA	intron (ENSMUST00000190117.1, intron 1 of 1)	protein_coding-intron (ENSMUST00000043313.14, intron 1 of 10)	17113	ENSMUST00000190117.1	ENSMUSG00000099969	ENSMUST00000190117			Gm28960			lncRNA
Sox9_E11_Sample1_peak_2175	chr1	153091608	153092428	+	110	NA	intron (ENSMUST00000186621.1, intron 8 of 8)	protein_coding-intron (ENSMUST00000043313.14, intron 7 of 10)	-1462	ENSMUST00000190960.1	ENSMUSG00000042751	ENSMUST00000043313			Nmnat2			protein_coding
Sox9_E11_Sample1_peak_2177	chr1	153134234	153134700	+	92	NA	intron (ENSMUST00000185356.6, intron 15 of 22)	protein_coding-intron (ENSMUST00000027753.12, intron 16 of 23)	-7233	ENSMUST00000189005.1	ENSMUSG00000026479	ENSMUST00000027753			Lamc2			protein_coding
Sox9_E11_Sample1_peak_2178	chr1	153140340	153141444	+	137	NA	intron (ENSMUST00000027753.12, intron 12 of 23)	protein_coding-intron (ENSMUST00000027753.12, intron 12 of 23)	11194	ENSMUST00000185328.1	ENSMUSG00000026479	ENSMUST00000027753			Lamc2			protein_coding
Sox9_E11_Sample1_peak_2179	chr1	153172064	153173200	+	140	NA	intron (ENSMUST00000027753.12, intron 2 of 23)	protein_coding-intron (ENSMUST00000027753.12, intron 2 of 23)	13415	ENSMUST00000185356.6	ENSMUSG00000026479	ENSMUST00000027753			Lamc2			protein_coding
Sox9_E11_Sample1_peak_2180	chr1	153185599	153187014	+	183	NA	promoter-TSS (ENSMUST00000185356.6)	protein_coding-promoter-TSS (ENSMUST00000185356.6)	141	ENSMUST00000188831.1	ENSMUSG00000026479	ENSMUST00000027753			Lamc2			protein_coding
Sox9_E11_Sample1_peak_2182	chr1	153273923	153275134	+	209	NA	intron (ENSMUST00000027752.14, intron 1 of 27)	protein_coding-intron (ENSMUST00000027752.14, intron 1 of 27)	12662	ENSMUST00000194884.1	ENSMUSG00000103818	ENSMUST00000194884			Gm38009			TEC
Sox9_E11_Sample1_peak_2183	chr1	153308128	153308606	+	88	NA	intron (ENSMUST00000027752.14, intron 1 of 27)	protein_coding-intron (ENSMUST00000027752.14, intron 1 of 27)	2935	ENSMUST00000110797.1	ENSMUSG00000079138	ENSMUST00000110797			Gm8818			processed_pseudogene
Sox9_E11_Sample1_peak_2184	chr1	153320384	153322007	+	76	NA	intron (ENSMUST00000027752.14, intron 1 of 27)	protein_coding-intron (ENSMUST00000027752.14, intron 1 of 27)	11591	ENSMUST00000027752.14	ENSMUSG00000026478	ENSMUST00000159251			Lamc1			protein_coding
Sox9_E11_Sample1_peak_2185	chr1	153331922	153333719	+	437	NA	promoter-TSS (ENSMUST00000027752.14)	protein_coding-promoter-TSS (ENSMUST00000027752.14)	-34	ENSMUST00000027752.14	ENSMUSG00000026478	ENSMUST00000159251			Lamc1			protein_coding
Sox9_E11_Sample1_peak_2186	chr1	153354600	153355369	+	68	NA	Intergenic	Intergenic	-22198	ENSMUST00000027752.14	ENSMUSG00000026478	ENSMUST00000159251			Lamc1			protein_coding
Sox9_E11_Sample1_peak_2188	chr1	153401774	153402230	+	60	NA	Intergenic	Intergenic	5788	ENSMUST00000186785.6	ENSMUSG00000073538	ENSMUST00000186785			E330020D12Rik			lncRNA
Sox9_E11_Sample1_peak_2189	chr1	153416038	153416629	+	38	NA	Intergenic	Intergenic	-2100	ENSMUST00000188717.1	ENSMUSG00000073538	ENSMUST00000186785			E330020D12Rik			lncRNA
Sox9_E11_Sample1_peak_2190	chr1	153424265	153425475	+	212	NA	promoter-TSS (ENSMUST00000042373.11)	protein_coding-promoter-TSS (ENSMUST00000042373.11)	-292	ENSMUST00000042373.11	ENSMUSG00000042708	ENSMUST00000137861			Shcbp1l			protein_coding
Sox9_E11_Sample1_peak_2191	chr1	153480539	153481219	+	65	NA	promoter-TSS (ENSMUST00000190383.1)	protein_coding-promoter-TSS (ENSMUST00000190383.1)	-329	ENSMUST00000190383.1	ENSMUSG00000042699	ENSMUST00000186966			Dhx9			protein_coding
Sox9_E11_Sample1_peak_2192	chr1	153486878	153487822	+	143	NA	intron (ENSMUST00000186966.6, intron 1 of 19)	protein_coding-intron (ENSMUST00000042141.11, intron 1 of 27)	258	ENSMUST00000186380.6	ENSMUSG00000042699	ENSMUST00000186966			Dhx9			protein_coding
Sox9_E11_Sample1_peak_2193	chr1	153531832	153532723	+	98	NA	intron (ENSMUST00000041874.8, intron 4 of 11)	protein_coding-intron (ENSMUST00000041874.8, intron 4 of 11)	17434	ENSMUST00000187747.1	ENSMUSG00000042684	ENSMUST00000187747			Npl			protein_coding
Sox9_E11_Sample1_peak_2194	chr1	153549374	153550020	+	54	NA	promoter-TSS (ENSMUST00000187747.1)	protein_coding-promoter-TSS (ENSMUST00000187747.1)	14	ENSMUST00000187747.1	ENSMUSG00000042684	ENSMUST00000187747			Npl			protein_coding
Sox9_E11_Sample1_peak_2195	chr1	153641411	153642370	+	229	NA	Intergenic	Intergenic	-11135	ENSMUST00000041776.11	ENSMUSG00000042671	ENSMUST00000111815			Rgs8			protein_coding
Sox9_E11_Sample1_peak_2196	chr1	153652723	153653548	+	102	NA	exon (ENSMUST00000041776.11, exon 1 of 7)	protein_coding-exon (ENSMUST00000041776.11, exon 1 of 7)	110	ENSMUST00000041776.11	ENSMUSG00000042671	ENSMUST00000111815			Rgs8			protein_coding
Sox9_E11_Sample1_peak_2197	chr1	153661334	153661859	+	73	NA	intron (ENSMUST00000124500.7, intron 1 of 5)	protein_coding-intron (ENSMUST00000041776.11, intron 1 of 6)	515	ENSMUST00000124500.7	ENSMUSG00000042671	ENSMUST00000111815			Rgs8			protein_coding
Sox9_E11_Sample1_peak_2198	chr1	153679198	153679934	+	102	NA	intron (ENSMUST00000111814.7, intron 4 of 5)	protein_coding-intron (ENSMUST00000041776.11, intron 5 of 6)	12077	ENSMUST00000147794.1	ENSMUSG00000042671	ENSMUST00000111815			Rgs8			protein_coding
Sox9_E11_Sample1_peak_2200	chr1	153739991	153740773	+	55	NA	promoter-TSS (ENSMUST00000027748.7)	protein_coding-promoter-TSS (ENSMUST00000027748.7)	33	ENSMUST00000027748.7	ENSMUSG00000026475	ENSMUST00000027748			Rgs16			protein_coding
Sox9_E11_Sample1_peak_2201	chr1	153749353	153750386	+	132	NA	promoter-TSS (ENSMUST00000187415.1)	lncRNA-promoter-TSS (ENSMUST00000187415.1)	365	ENSMUST00000182722.7	ENSMUSG00000066800	ENSMUST00000086209			Rnasel			protein_coding
Sox9_E11_Sample1_peak_2203	chr1	153899497	153901313	+	449	NA	promoter-TSS (ENSMUST00000123490.1)	protein_coding-promoter-TSS (ENSMUST00000123490.1)	-177	ENSMUST00000190620.1	ENSMUSG00000045968	ENSMUST00000059607			Teddm2			protein_coding
Sox9_E11_Sample1_peak_2205	chr1	153962108	153962586	+	76	NA	Intergenic	Intergenic	23121	ENSMUST00000185385.1	ENSMUSG00000100014	ENSMUST00000185385			Gm29290			lncRNA
Sox9_E11_Sample1_peak_2206	chr1	154034027	154034555	+	36	NA	promoter-TSS (ENSMUST00000188704.1)	lncRNA-promoter-TSS (ENSMUST00000188704.1)	10	ENSMUST00000188704.1	ENSMUSG00000100502	ENSMUST00000188704			Gm28286			lncRNA
Sox9_E11_Sample1_peak_2207	chr1	154112336	154112975	+	73	NA	intron (ENSMUST00000190485.1, intron 1 of 3)	lncRNA-intron (ENSMUST00000185465.6, intron 1 of 2)	3498	ENSMUST00000185465.6	ENSMUSG00000100627	ENSMUST00000190485			A830008E24Rik			lncRNA
Sox9_E11_Sample1_peak_2208	chr1	154118030	154118804	+	100	NA	promoter-TSS (ENSMUST00000190485.1)	lncRNA-promoter-TSS (ENSMUST00000190485.1)	-466	ENSMUST00000190485.1	ENSMUSG00000100627	ENSMUST00000190485			A830008E24Rik			lncRNA
Sox9_E11_Sample1_peak_2209	chr1	154143722	154144201	+	39	NA	Intergenic	Intergenic	-26010	ENSMUST00000190485.1	ENSMUSG00000100627	ENSMUST00000190485			A830008E24Rik			lncRNA
Sox9_E11_Sample1_peak_2210	chr1	154149903	154150498	+	67	NA	Intergenic	Intergenic	-32249	ENSMUST00000190485.1	ENSMUSG00000100627	ENSMUST00000190485			A830008E24Rik			lncRNA
Sox9_E11_Sample1_peak_2211	chr1	154180672	154181097	+	25	NA	Intergenic	Intergenic	-20303	ENSMUST00000086195.6	ENSMUSG00000066797	ENSMUST00000086195			Zfp648			protein_coding
Sox9_E11_Sample1_peak_2212	chr1	154182928	154183512	+	85	NA	Intergenic	Intergenic	-17967	ENSMUST00000086195.6	ENSMUSG00000066797	ENSMUST00000086195			Zfp648			protein_coding
Sox9_E11_Sample1_peak_2213	chr1	154204825	154205455	+	142	NA	exon (ENSMUST00000086195.6, exon 2 of 2)	protein_coding-exon (ENSMUST00000086195.6, exon 2 of 2)	3953	ENSMUST00000086195.6	ENSMUSG00000066797	ENSMUST00000086195			Zfp648			protein_coding
Sox9_E11_Sample1_peak_2214	chr1	154726524	154727232	+	156	NA	promoter-TSS (ENSMUST00000004214.14)	protein_coding-promoter-TSS (ENSMUST00000004214.14)	-522	ENSMUST00000187541.6	ENSMUSG00000004110	ENSMUST00000211821			Cacna1e			protein_coding
Sox9_E11_Sample1_peak_2215	chr1	154785946	154786442	+	50	NA	intron (ENSMUST00000188321.1, intron 1 of 3)	protein_coding-intron (ENSMUST00000188321.1, intron 1 of 3)	30747	ENSMUST00000238369.1	ENSMUSG00000004110	ENSMUST00000211821			Cacna1e			protein_coding
Sox9_E11_Sample1_peak_2217	chr1	154883590	154885119	+	91	NA	promoter-TSS (ENSMUST00000186256.1)	protein_coding-promoter-TSS (ENSMUST00000186256.1)	147	ENSMUST00000188321.1	ENSMUSG00000004110	ENSMUST00000211821			Cacna1e			protein_coding
Sox9_E11_Sample1_peak_2218	chr1	155013846	155014528	+	68	NA	intron (ENSMUST00000190720.1, intron 3 of 3)	lncRNA-intron (ENSMUST00000190720.1, intron 3 of 3)	-17552	ENSMUST00000191584.1	ENSMUSG00000101433	ENSMUST00000191584			Gm29441			processed_pseudogene
Sox9_E11_Sample1_peak_2219	chr1	155030768	155031296	+	60	NA	promoter-TSS (ENSMUST00000191584.1)	processed_pseudogene-promoter-TSS (ENSMUST00000191584.1)	-707	ENSMUST00000191584.1	ENSMUSG00000101433	ENSMUST00000191584			Gm29441			processed_pseudogene
Sox9_E11_Sample1_peak_2220	chr1	155052059	155053095	+	152	NA	intron (ENSMUST00000190720.1, intron 1 of 3)	lncRNA-intron (ENSMUST00000190720.1, intron 1 of 3)	4602	ENSMUST00000190720.1	ENSMUSG00000101880	ENSMUST00000190720			Gm29282			lncRNA
Sox9_E11_Sample1_peak_2222	chr1	155082945	155084145	+	432	NA	promoter-TSS (ENSMUST00000181160.2)	lncRNA-promoter-TSS (ENSMUST00000181160.2)	-279	ENSMUST00000181160.2	ENSMUSG00000096950	ENSMUST00000181160			Gm9530			lncRNA
Sox9_E11_Sample1_peak_2223	chr1	155093378	155093949	+	51	NA	Intergenic	Intergenic	5973	ENSMUST00000055322.5	ENSMUSG00000056708	ENSMUST00000055322			Ier5			protein_coding
Sox9_E11_Sample1_peak_2224	chr1	155098008	155099781	+	328	NA	exon (ENSMUST00000055322.5, exon 1 of 1)	protein_coding-exon (ENSMUST00000055322.5, exon 1 of 1)	742	ENSMUST00000055322.5	ENSMUSG00000056708	ENSMUST00000055322			Ier5			protein_coding
Sox9_E11_Sample1_peak_2225	chr1	155108007	155109452	+	85	NA	Intergenic	Intergenic	-9093	ENSMUST00000055322.5	ENSMUSG00000056708	ENSMUST00000055322			Ier5			protein_coding
Sox9_E11_Sample1_peak_2226	chr1	155158300	155159314	+	369	NA	promoter-TSS (ENSMUST00000027743.12)	protein_coding-promoter-TSS (ENSMUST00000027743.12)	8	ENSMUST00000191769.1	ENSMUSG00000026470	ENSMUST00000192091			Stx6			protein_coding
Sox9_E11_Sample1_peak_2228	chr1	155199128	155199827	+	97	NA	intron (ENSMUST00000192690.1, intron 3 of 3)	protein_coding-intron (ENSMUST00000027743.12, intron 7 of 7)	4456	ENSMUST00000194158.1	ENSMUSG00000026470	ENSMUST00000192091			Stx6			protein_coding
Sox9_E11_Sample1_peak_2229	chr1	155224099	155224642	+	64	NA	intron (ENSMUST00000186156.6, intron 5 of 9)	protein_coding-intron (ENSMUST00000035914.4, intron 2 of 6)	804	ENSMUST00000186551.1	ENSMUSG00000033722	ENSMUST00000187781			BC034090			protein_coding
Sox9_E11_Sample1_peak_2230	chr1	155243986	155244940	+	149	NA	promoter-TSS (ENSMUST00000186156.6)	protein_coding-promoter-TSS (ENSMUST00000186156.6)	-19	ENSMUST00000186156.6	ENSMUSG00000033722	ENSMUST00000187781			BC034090			protein_coding
Sox9_E11_Sample1_peak_2231	chr1	155281257	155281701	+	32	NA	TTS (ENSMUST00000139925.1)	protein_coding-TTS (ENSMUST00000139925.1)	10548	ENSMUST00000192359.1	ENSMUSG00000026469	ENSMUST00000027741			Xpr1			protein_coding
Sox9_E11_Sample1_peak_2232	chr1	155416660	155417587	+	418	NA	intron (ENSMUST00000111775.7, intron 1 of 13)	protein_coding-intron (ENSMUST00000027741.11, intron 1 of 14)	206	ENSMUST00000027741.11	ENSMUSG00000026469	ENSMUST00000027741			Xpr1			protein_coding
Sox9_E11_Sample1_peak_2233	chr1	155438663	155439062	+	68	NA	Intergenic	Intergenic	-21447	ENSMUST00000111774.1	ENSMUSG00000026469	ENSMUST00000027741			Xpr1			protein_coding
Sox9_E11_Sample1_peak_2235	chr1	155481805	155482372	+	32	NA	Intergenic	Intergenic	45023	ENSMUST00000097531.2	ENSMUSG00000073535	ENSMUST00000194133			Gm5532			lncRNA
Sox9_E11_Sample1_peak_2236	chr1	155491270	155492112	+	51	NA	Intergenic	Intergenic	35420	ENSMUST00000097531.2	ENSMUSG00000073535	ENSMUST00000194133			Gm5532			lncRNA
Sox9_E11_Sample1_peak_2237	chr1	155527319	155528205	+	87	NA	promoter-TSS (ENSMUST00000097531.2)	lncRNA-promoter-TSS (ENSMUST00000097531.2)	-619	ENSMUST00000194133.1	ENSMUSG00000073535	ENSMUST00000194133			Gm5532			lncRNA
Sox9_E11_Sample1_peak_2238	chr1	155557864	155558801	+	244	NA	exon (ENSMUST00000035560.8, exon 1 of 8)	protein_coding-exon (ENSMUST00000035560.8, exon 1 of 8)	206	ENSMUST00000097529.4	ENSMUSG00000033701	ENSMUST00000194476			Acbd6			protein_coding
Sox9_E11_Sample1_peak_2240	chr1	155693184	155693674	+	40	NA	Intergenic	Intergenic	6438	ENSMUST00000192730.1	ENSMUSG00000033701	ENSMUST00000194476			Acbd6			protein_coding
Sox9_E11_Sample1_peak_2243	chr1	155736910	155737287	+	37	NA	intron (ENSMUST00000195275.1, intron 1 of 4)	protein_coding-intron (ENSMUST00000027740.13, intron 1 of 5)	4929	ENSMUST00000027740.13	ENSMUSG00000026468	ENSMUST00000195275			Lhx4			protein_coding
Sox9_E11_Sample1_peak_2244	chr1	155741172	155743132	+	124	NA	promoter-TSS (ENSMUST00000027740.13)	protein_coding-promoter-TSS (ENSMUST00000027740.13)	-125	ENSMUST00000027740.13	ENSMUSG00000026468	ENSMUST00000195275			Lhx4			protein_coding
Sox9_E11_Sample1_peak_2245	chr1	155784739	155785350	+	32	NA	intron (ENSMUST00000035325.14, intron 8 of 11)	protein_coding-intron (ENSMUST00000035325.14, intron 8 of 11)	-3048	ENSMUST00000130701.1	ENSMUSG00000033684	ENSMUST00000035325			Qsox1			protein_coding
Sox9_E11_Sample1_peak_2246	chr1	155812360	155813360	+	191	NA	promoter-TSS (ENSMUST00000035325.14)	protein_coding-promoter-TSS (ENSMUST00000035325.14)	-9	ENSMUST00000111764.7	ENSMUSG00000033684	ENSMUST00000035325			Qsox1			protein_coding
Sox9_E11_Sample1_peak_2247	chr1	155972565	155974145	+	342	NA	promoter-TSS (ENSMUST00000124495.2)	protein_coding-promoter-TSS (ENSMUST00000124495.2)	37	ENSMUST00000193347.1	ENSMUSG00000102833	ENSMUST00000193347			Gm9694			TEC
Sox9_E11_Sample1_peak_2249	chr1	156035555	156036643	+	458	NA	promoter-TSS (ENSMUST00000123705.7)	protein_coding-promoter-TSS (ENSMUST00000123705.7)	-34	ENSMUST00000128941.7	ENSMUSG00000050565	ENSMUST00000111757			Tor1aip2			protein_coding
Sox9_E11_Sample1_peak_2252	chr1	156183569	156184684	+	107	NA	intron (ENSMUST00000015628.3, intron 1 of 4)	protein_coding-intron (ENSMUST00000015628.3, intron 1 of 4)	20900	ENSMUST00000015628.3	ENSMUSG00000015484	ENSMUST00000015628			Fam163a			protein_coding
Sox9_E11_Sample1_peak_2253	chr1	156190778	156191194	+	20	NA	intron (ENSMUST00000015628.3, intron 1 of 4)	protein_coding-intron (ENSMUST00000015628.3, intron 1 of 4)	14040	ENSMUST00000015628.3	ENSMUSG00000015484	ENSMUST00000015628			Fam163a			protein_coding
Sox9_E11_Sample1_peak_2254	chr1	156204385	156205325	+	170	NA	exon (ENSMUST00000015628.3, exon 1 of 5)	protein_coding-exon (ENSMUST00000015628.3, exon 1 of 5)	171	ENSMUST00000015628.3	ENSMUSG00000015484	ENSMUST00000015628			Fam163a			protein_coding
Sox9_E11_Sample1_peak_2255	chr1	156241303	156242169	+	72	NA	Intergenic	Intergenic	-14443	ENSMUST00000193704.1	ENSMUSG00000102932	ENSMUST00000193704			Gm38113			processed_pseudogene
Sox9_E11_Sample1_peak_2256	chr1	156302916	156304021	+	221	NA	promoter-TSS (ENSMUST00000167528.8)	protein_coding-promoter-TSS (ENSMUST00000167528.8)	-21	ENSMUST00000195064.1	ENSMUSG00000103705	ENSMUST00000195064			4930518J20Rik			lncRNA
Sox9_E11_Sample1_peak_2257	chr1	156310646	156311109	+	26	NA	promoter-TSS (ENSMUST00000193020.1)	protein_coding-promoter-TSS (ENSMUST00000193020.1)	-136	ENSMUST00000193020.1	ENSMUSG00000026602	ENSMUST00000193020			Nphs2			protein_coding
Sox9_E11_Sample1_peak_2258	chr1	156420670	156421206	+	290	NA	promoter-TSS (ENSMUST00000179744.1)	protein_coding-promoter-TSS (ENSMUST00000179744.1)	-16	ENSMUST00000179744.1	ENSMUSG00000026601	ENSMUST00000212747			Axdnd1			protein_coding
Sox9_E11_Sample1_peak_2259	chr1	156473059	156474482	+	158	NA	intron (ENSMUST00000191379.6, intron 1 of 6)	protein_coding-intron (ENSMUST00000187073.1, intron 1 of 3)	427	ENSMUST00000187073.1	ENSMUSG00000026600	ENSMUST00000186420			Soat1			protein_coding
Sox9_E11_Sample1_peak_2260	chr1	156520128	156520821	+	85	NA	Intergenic	Intergenic	-3538	ENSMUST00000190422.2	ENSMUSG00000101523	ENSMUST00000190422			Csnk2a3			processed_pseudogene
Sox9_E11_Sample1_peak_2261	chr1	156543867	156544502	+	111	NA	Intergenic	Intergenic	-14602	ENSMUST00000173929.7	ENSMUSG00000026596	ENSMUST00000173929			Abl2			protein_coding
Sox9_E11_Sample1_peak_2262	chr1	156558278	156559829	+	386	NA	promoter-TSS (ENSMUST00000027888.12)	protein_coding-promoter-TSS (ENSMUST00000027888.12)	4	ENSMUST00000027888.12	ENSMUSG00000026596	ENSMUST00000173929			Abl2			protein_coding
Sox9_E11_Sample1_peak_2263	chr1	156620498	156620949	+	32	NA	intron (ENSMUST00000190749.1, intron 1 of 4)	protein_coding-intron (ENSMUST00000027888.12, intron 1 of 11)	4800	ENSMUST00000190749.1	ENSMUSG00000026596	ENSMUST00000173929			Abl2			protein_coding
Sox9_E11_Sample1_peak_2266	chr1	156660428	156661012	+	26	NA	TTS (ENSMUST00000152604.1)	protein_coding-TTS (ENSMUST00000152604.1)	-2262	ENSMUST00000154353.1	ENSMUSG00000060519	ENSMUST00000152604			Tor3a			protein_coding
Sox9_E11_Sample1_peak_2267	chr1	156673373	156674754	+	69	NA	intron (ENSMUST00000188964.6, intron 1 of 6)	protein_coding-intron (ENSMUST00000079625.10, intron 1 of 5)	251	ENSMUST00000188964.6	ENSMUSG00000060519	ENSMUST00000152604			Tor3a			protein_coding
Sox9_E11_Sample1_peak_2268	chr1	156717967	156719493	+	442	NA	intron (ENSMUST00000122424.7, intron 1 of 8)	protein_coding-intron (ENSMUST00000086153.7, intron 1 of 7)	342	ENSMUST00000122424.7	ENSMUSG00000033557	ENSMUST00000188941			Fam20b			protein_coding
Sox9_E11_Sample1_peak_2269	chr1	156741849	156742313	+	53	NA	Intergenic	Intergenic	-22995	ENSMUST00000086153.7	ENSMUSG00000033557	ENSMUST00000188941			Fam20b			protein_coding
Sox9_E11_Sample1_peak_2270	chr1	156787309	156788023	+	169	NA	Intergenic	Intergenic	-5846	ENSMUST00000121352.1	ENSMUSG00000046057	ENSMUST00000121352			Gm15428			processed_pseudogene
Sox9_E11_Sample1_peak_2272	chr1	156808483	156809012	+	93	NA	exon (ENSMUST00000063199.12, exon 20 of 20)	protein_coding-exon (ENSMUST00000063199.12, exon 20 of 20)	4821	ENSMUST00000189208.1	ENSMUSG00000026594	ENSMUST00000172057			Ralgps2			protein_coding
Sox9_E11_Sample1_peak_2273	chr1	156813499	156814301	+	64	NA	promoter-TSS (ENSMUST00000189208.1)	protein_coding-promoter-TSS (ENSMUST00000189208.1)	-332	ENSMUST00000189208.1	ENSMUSG00000026594	ENSMUST00000172057			Ralgps2			protein_coding
Sox9_E11_Sample1_peak_2274	chr1	156838323	156839121	+	148	NA	promoter-TSS (ENSMUST00000111720.1)	protein_coding-promoter-TSS (ENSMUST00000111720.1)	160	ENSMUST00000027885.7	ENSMUSG00000033544	ENSMUST00000111720			Angptl1			protein_coding
Sox9_E11_Sample1_peak_2276	chr1	156938720	156940301	+	365	NA	promoter-TSS (ENSMUST00000027886.13)	protein_coding-promoter-TSS (ENSMUST00000027886.13)	21	ENSMUST00000063199.12	ENSMUSG00000026594	ENSMUST00000172057			Ralgps2			protein_coding
Sox9_E11_Sample1_peak_2277	chr1	157039129	157040272	+	53	NA	intron (ENSMUST00000190681.1, intron 2 of 2)	lncRNA-intron (ENSMUST00000190681.1, intron 2 of 2)	-3847	ENSMUST00000193527.1	ENSMUSG00000103325	ENSMUST00000193527			Gm10531			TEC
Sox9_E11_Sample1_peak_2278	chr1	157048259	157049143	+	114	NA	intron (ENSMUST00000190681.1, intron 1 of 2)	lncRNA-intron (ENSMUST00000190681.1, intron 1 of 2)	5154	ENSMUST00000193527.1	ENSMUSG00000103325	ENSMUST00000193527			Gm10531			TEC
Sox9_E11_Sample1_peak_2279	chr1	157076237	157077315	+	170	NA	Intergenic	Intergenic	-22742	ENSMUST00000190681.1	ENSMUSG00000101768	ENSMUST00000190681			Gm28694			lncRNA
Sox9_E11_Sample1_peak_2280	chr1	157086267	157086985	+	149	NA	Intergenic	Intergenic	21762	ENSMUST00000119526.1	ENSMUSG00000026592	ENSMUST00000118207			Tex35			protein_coding
Sox9_E11_Sample1_peak_2282	chr1	157177075	157177594	+	59	NA	intron (ENSMUST00000078308.12, intron 7 of 17)	protein_coding-intron (ENSMUST00000078308.12, intron 7 of 17)	4107	ENSMUST00000128538.1	ENSMUSG00000070565	ENSMUST00000143080			Rasal2			protein_coding
Sox9_E11_Sample1_peak_2284	chr1	157256151	157256741	+	44	NA	intron (ENSMUST00000132699.7, intron 3 of 17)	protein_coding-intron (ENSMUST00000078308.12, intron 3 of 17)	236	ENSMUST00000134543.7	ENSMUSG00000070565	ENSMUST00000143080			Rasal2			protein_coding
Sox9_E11_Sample1_peak_2286	chr1	157411439	157413102	+	554	NA	promoter-TSS (ENSMUST00000061537.11)	transcribed_processed_pseudogene-promoter-TSS (ENSMUST00000061537.11)	-82	ENSMUST00000061537.11	ENSMUSG00000049881	ENSMUST00000189791			2810025M15Rik			transcribed_processed_pseudogene
Sox9_E11_Sample1_peak_2287	chr1	157449507	157450506	+	107	NA	Intergenic	Intergenic	-8571	ENSMUST00000193791.5	ENSMUSG00000033488	ENSMUST00000046743			Cryzl2			protein_coding
Sox9_E11_Sample1_peak_2288	chr1	157458205	157459193	+	196	NA	intron (ENSMUST00000119891.6, intron 1 of 6)	protein_coding-intron (ENSMUST00000046743.10, intron 1 of 9)	119	ENSMUST00000119891.6	ENSMUSG00000033488	ENSMUST00000046743			Cryzl2			protein_coding
Sox9_E11_Sample1_peak_2289	chr1	157512581	157513469	+	159	NA	intron (ENSMUST00000086130.8, intron 2 of 27)	protein_coding-intron (ENSMUST00000027881.14, intron 1 of 26)	-1304	ENSMUST00000135147.2	ENSMUSG00000087093	ENSMUST00000135147			Gm15486			lncRNA
Sox9_E11_Sample1_peak_2290	chr1	157526151	157527173	+	73	NA	intron (ENSMUST00000111700.7, intron 1 of 25)	protein_coding-intron (ENSMUST00000027881.14, intron 2 of 26)	515	ENSMUST00000111700.7	ENSMUSG00000026589	ENSMUST00000155665			Sec16b			protein_coding
Sox9_E11_Sample1_peak_2292	chr1	157554908	157555220	+	51	NA	intron (ENSMUST00000027881.14, intron 16 of 26)	protein_coding-intron (ENSMUST00000027881.14, intron 16 of 26)	17013	ENSMUST00000155665.1	ENSMUSG00000026589	ENSMUST00000155665			Sec16b			protein_coding
Sox9_E11_Sample1_peak_2294	chr1	157605426	157605789	+	53	NA	Intergenic	Intergenic	-4192	ENSMUST00000191692.1	ENSMUSG00000103501	ENSMUST00000191692			Gm7412			processed_pseudogene
Sox9_E11_Sample1_peak_2295	chr1	157705309	157705799	+	62	NA	Intergenic	Intergenic	-83418	ENSMUST00000193203.1	ENSMUSG00000103962	ENSMUST00000193203			Gm38213			processed_pseudogene
Sox9_E11_Sample1_peak_2296	chr1	157717068	157717772	+	114	NA	Intergenic	Intergenic	-95284	ENSMUST00000193203.1	ENSMUSG00000103962	ENSMUST00000193203			Gm38213			processed_pseudogene
Sox9_E11_Sample1_peak_2297	chr1	157745750	157746263	+	68	NA	Intergenic	Intergenic	-123870	ENSMUST00000193203.1	ENSMUSG00000103962	ENSMUST00000193203			Gm38213			processed_pseudogene
Sox9_E11_Sample1_peak_2298	chr1	157755188	157755829	+	76	NA	Intergenic	Intergenic	-133372	ENSMUST00000193203.1	ENSMUSG00000103962	ENSMUST00000193203			Gm38213			processed_pseudogene
Sox9_E11_Sample1_peak_2300	chr1	158125919	158126488	+	32	NA	intron (ENSMUST00000192097.1, intron 3 of 3)	TEC-intron (ENSMUST00000192097.1, intron 3 of 3)	170261	ENSMUST00000194578.1	ENSMUSG00000004031	ENSMUST00000195271			Brinp2			protein_coding
Sox9_E11_Sample1_peak_2301	chr1	158163369	158164091	+	53	NA	Intergenic	Intergenic	132734	ENSMUST00000194578.1	ENSMUSG00000004031	ENSMUST00000195271			Brinp2			protein_coding
Sox9_E11_Sample1_peak_2302	chr1	158249747	158250596	+	142	NA	intron (ENSMUST00000004133.10, intron 6 of 7)	protein_coding-intron (ENSMUST00000004133.10, intron 6 of 7)	46293	ENSMUST00000194578.1	ENSMUSG00000004031	ENSMUST00000195271			Brinp2			protein_coding
Sox9_E11_Sample1_peak_2303	chr1	158355345	158356864	+	616	NA	exon (ENSMUST00000004133.10, exon 1 of 8)	protein_coding-exon (ENSMUST00000004133.10, exon 1 of 8)	125	ENSMUST00000195271.4	ENSMUSG00000004031	ENSMUST00000195271			Brinp2			protein_coding
Sox9_E11_Sample1_peak_2304	chr1	158362382	158363208	+	95	NA	exon (ENSMUST00000046110.15, exon 1 of 23)	protein_coding-exon (ENSMUST00000046110.15, exon 1 of 23)	245	ENSMUST00000195311.5	ENSMUSG00000026587	ENSMUST00000194369			Astn1			protein_coding
Sox9_E11_Sample1_peak_2305	chr1	158408184	158408597	+	20	NA	intron (ENSMUST00000195311.5, intron 1 of 21)	protein_coding-intron (ENSMUST00000046110.15, intron 1 of 22)	32454	ENSMUST00000193534.1	ENSMUSG00000103762	ENSMUST00000193534			Gm37861			TEC
Sox9_E11_Sample1_peak_2306	chr1	158501202	158501751	+	53	NA	intron (ENSMUST00000192868.1, intron 1 of 3)	protein_coding-intron (ENSMUST00000046110.15, intron 2 of 22)	-4149	ENSMUST00000093595.2	ENSMUSG00000070103	ENSMUST00000093595			Mir488			miRNA
Sox9_E11_Sample1_peak_2307	chr1	158597019	158597522	+	76	NA	TTS (ENSMUST00000193599.1)	protein_coding-TTS (ENSMUST00000193599.1)	292	ENSMUST00000194041.1	ENSMUSG00000026587	ENSMUST00000194369			Astn1			protein_coding
Sox9_E11_Sample1_peak_2308	chr1	158654011	158654802	+	148	NA	intron (ENSMUST00000195311.5, intron 16 of 21)	protein_coding-intron (ENSMUST00000046110.15, intron 16 of 22)	-2743	ENSMUST00000194217.1	ENSMUSG00000026587	ENSMUST00000194369			Astn1			protein_coding
Sox9_E11_Sample1_peak_2309	chr1	158699518	158700911	+	136	NA	Intergenic	Intergenic	21420	ENSMUST00000194658.1	ENSMUSG00000026587	ENSMUST00000194369			Astn1			protein_coding
Sox9_E11_Sample1_peak_2310	chr1	158931130	158931926	+	63	NA	intron (ENSMUST00000159861.8, intron 2 of 21)	protein_coding-intron (ENSMUST00000159861.8, intron 2 of 21)	26839	ENSMUST00000159861.8	ENSMUSG00000073530	ENSMUST00000177789			Pappa2			protein_coding
Sox9_E11_Sample1_peak_2311	chr1	158953455	158954287	+	69	NA	intron (ENSMUST00000159861.8, intron 1 of 21)	protein_coding-intron (ENSMUST00000159861.8, intron 1 of 21)	4496	ENSMUST00000159861.8	ENSMUSG00000073530	ENSMUST00000177789			Pappa2			protein_coding
Sox9_E11_Sample1_peak_2312	chr1	158960242	158960825	+	119	NA	promoter-TSS (ENSMUST00000177789.1)	protein_coding-promoter-TSS (ENSMUST00000177789.1)	-152	ENSMUST00000177789.1	ENSMUSG00000073530	ENSMUST00000177789			Pappa2			protein_coding
Sox9_E11_Sample1_peak_2313	chr1	159149935	159150259	+	46	NA	intron (ENSMUST00000195279.1, intron 3 of 4)	lncRNA-intron (ENSMUST00000195279.1, intron 3 of 4)	15825	ENSMUST00000195279.1	ENSMUSG00000104014	ENSMUST00000195279			4930562F17Rik			lncRNA
Sox9_E11_Sample1_peak_2314	chr1	159199388	159200004	+	93	NA	Intergenic	Intergenic	11445	ENSMUST00000193824.1	ENSMUSG00000104169	ENSMUST00000193824			Gm7430			unprocessed_pseudogene
Sox9_E11_Sample1_peak_2315	chr1	159231605	159233264	+	518	NA	promoter-TSS (ENSMUST00000192215.5)	protein_coding-promoter-TSS (ENSMUST00000192215.5)	108	ENSMUST00000076894.10	ENSMUSG00000040782	ENSMUST00000076894			Cop1			protein_coding
Sox9_E11_Sample1_peak_2316	chr1	159396385	159396829	+	46	NA	Intergenic	Intergenic	18203	ENSMUST00000194705.1	ENSMUSG00000103289	ENSMUST00000194705			Gm31256			processed_pseudogene
Sox9_E11_Sample1_peak_2317	chr1	159523661	159524554	+	219	NA	exon (ENSMUST00000192069.5, exon 1 of 23)	protein_coding-exon (ENSMUST00000192069.5, exon 1 of 23)	266	ENSMUST00000195199.1	ENSMUSG00000015829	ENSMUST00000192457			Tnr			protein_coding
Sox9_E11_Sample1_peak_2318	chr1	159552813	159553351	+	60	NA	intron (ENSMUST00000195199.1, intron 1 of 1)	protein_coding-intron (ENSMUST00000192069.5, intron 1 of 22)	29241	ENSMUST00000195199.1	ENSMUSG00000015829	ENSMUST00000192457			Tnr			protein_coding
Sox9_E11_Sample1_peak_2319	chr1	159650365	159651008	+	85	NA	intron (ENSMUST00000097514.7, intron 1 of 1)	lncRNA-intron (ENSMUST00000097514.7, intron 1 of 1)	-30976	ENSMUST00000194909.1	ENSMUSG00000073528	ENSMUST00000097514			Gm10530			lncRNA
Sox9_E11_Sample1_peak_2320	chr1	159661035	159661446	+	32	NA	intron (ENSMUST00000097514.7, intron 1 of 1)	lncRNA-intron (ENSMUST00000097514.7, intron 1 of 1)	-20422	ENSMUST00000194909.1	ENSMUSG00000073528	ENSMUST00000097514			Gm10530			lncRNA
Sox9_E11_Sample1_peak_2321	chr1	159725026	159725526	+	38	NA	intron (ENSMUST00000195199.1, intron 1 of 1)	protein_coding-intron (ENSMUST00000192069.5, intron 1 of 22)	-12234	ENSMUST00000111669.8	ENSMUSG00000015829	ENSMUST00000192457			Tnr			protein_coding
Sox9_E11_Sample1_peak_2324	chr1	159834856	159835414	+	20	NA	intron (ENSMUST00000193325.1, intron 1 of 1)	protein_coding-intron (ENSMUST00000111669.8, intron 1 of 21)	-15262	ENSMUST00000192457.1	ENSMUSG00000015829	ENSMUST00000192457			Tnr			protein_coding
Sox9_E11_Sample1_peak_2325	chr1	159854264	159854844	+	53	NA	intron (ENSMUST00000192069.5, intron 4 of 22)	protein_coding-intron (ENSMUST00000111669.8, intron 3 of 21)	4157	ENSMUST00000192457.1	ENSMUSG00000015829	ENSMUST00000192457			Tnr			protein_coding
Sox9_E11_Sample1_peak_2326	chr1	159869546	159870770	+	185	NA	intron (ENSMUST00000192069.5, intron 8 of 22)	protein_coding-intron (ENSMUST00000111669.8, intron 7 of 21)	19761	ENSMUST00000192457.1	ENSMUSG00000015829	ENSMUST00000192457			Tnr			protein_coding
Sox9_E11_Sample1_peak_2328	chr1	159983359	159984004	+	41	NA	promoter-TSS (ENSMUST00000157520.1)	snoRNA-promoter-TSS (ENSMUST00000157520.1)	-76	ENSMUST00000157520.1	ENSMUSG00000088145	ENSMUST00000157520			Gm24719			snoRNA
Sox9_E11_Sample1_peak_2329	chr1	160043965	160044967	+	227	NA	promoter-TSS (ENSMUST00000060298.14)	protein_coding-promoter-TSS (ENSMUST00000060298.14)	19	ENSMUST00000165923.1	ENSMUSG00000090394	ENSMUST00000163892			4930523C07Rik			protein_coding
Sox9_E11_Sample1_peak_2331	chr1	160057302	160058154	+	232	NA	intron (ENSMUST00000165923.1, intron 2 of 3)	protein_coding-intron (ENSMUST00000060298.14, intron 1 of 2)	13281	ENSMUST00000165923.1	ENSMUSG00000090394	ENSMUST00000163892			4930523C07Rik			protein_coding
Sox9_E11_Sample1_peak_2333	chr1	160105548	160106199	+	60	NA	intron (ENSMUST00000131919.1, intron 12 of 17)	protein_coding-intron (ENSMUST00000039178.11, intron 16 of 21)	-27888	ENSMUST00000164249.2	ENSMUSG00000026729	ENSMUST00000028061			4930562F07Rik			lncRNA
Sox9_E11_Sample1_peak_2334	chr1	160194727	160195759	+	483	NA	promoter-TSS (ENSMUST00000078878.13)	protein_coding-promoter-TSS (ENSMUST00000078878.13)	28	ENSMUST00000135680.7	ENSMUSG00000058267	ENSMUST00000097193			Mrps14			protein_coding
Sox9_E11_Sample1_peak_2335	chr1	160211987	160213626	+	465	NA	promoter-TSS (ENSMUST00000014370.10)	protein_coding-promoter-TSS (ENSMUST00000014370.10)	-1	ENSMUST00000195654.1	ENSMUSG00000014226	ENSMUST00000014370			Cacybp			protein_coding
Sox9_E11_Sample1_peak_2336	chr1	160242357	160243052	+	53	NA	intron (ENSMUST00000193185.5, intron 3 of 6)	protein_coding-intron (ENSMUST00000028052.11, intron 4 of 8)	5294	ENSMUST00000194623.1	ENSMUSG00000026721	ENSMUST00000192019			Rabgap1l			protein_coding
Sox9_E11_Sample1_peak_2336-2	chr1	160243502	160243945	+	53	NA	intron (ENSMUST00000193185.5, intron 3 of 6)	protein_coding-intron (ENSMUST00000028052.11, intron 4 of 8)	4275	ENSMUST00000194623.1	ENSMUSG00000026721	ENSMUST00000192019			Rabgap1l			protein_coding
Sox9_E11_Sample1_peak_2337	chr1	160250614	160251494	+	60	NA	promoter-TSS (ENSMUST00000193729.1)	protein_coding-promoter-TSS (ENSMUST00000193729.1)	-296	ENSMUST00000193729.1	ENSMUSG00000026721	ENSMUST00000192019			Rabgap1l			protein_coding
Sox9_E11_Sample1_peak_2338	chr1	160259523	160260597	+	157	NA	intron (ENSMUST00000235109.1, intron 3 of 6)	protein_coding-intron (ENSMUST00000028049.12, intron 19 of 20)	-4264	ENSMUST00000194105.1	ENSMUSG00000104302	ENSMUST00000194105			Gm36975			lncRNA
Sox9_E11_Sample1_peak_2339	chr1	160271241	160272096	+	178	NA	intron (ENSMUST00000194105.1, intron 2 of 4)	protein_coding-intron (ENSMUST00000028049.12, intron 19 of 20)	7344	ENSMUST00000194105.1	ENSMUSG00000104302	ENSMUST00000194105			Gm36975			lncRNA
Sox9_E11_Sample1_peak_2340	chr1	160308649	160309968	+	138	NA	promoter-TSS (ENSMUST00000191941.1)	protein_coding-promoter-TSS (ENSMUST00000191941.1)	-137	ENSMUST00000191941.1	ENSMUSG00000026721	ENSMUST00000192019			Rabgap1l			protein_coding
Sox9_E11_Sample1_peak_2342	chr1	160351280	160352393	+	245	NA	promoter-TSS (ENSMUST00000028052.11)	protein_coding-promoter-TSS (ENSMUST00000028052.11)	-265	ENSMUST00000028052.11	ENSMUSG00000026721	ENSMUST00000192019			Rabgap1l			protein_coding
Sox9_E11_Sample1_peak_2344	chr1	160791994	160793353	+	364	NA	intron (ENSMUST00000193810.1, intron 1 of 3)	protein_coding-intron (ENSMUST00000028049.12, intron 1 of 20)	265	ENSMUST00000195442.5	ENSMUSG00000026721	ENSMUST00000192019			Rabgap1l			protein_coding
Sox9_E11_Sample1_peak_2345	chr1	160906048	160907401	+	649	NA	intron (ENSMUST00000161609.7, intron 1 of 19)	protein_coding-intron (ENSMUST00000161609.7, intron 1 of 19)	306	ENSMUST00000161609.7	ENSMUSG00000040423	ENSMUST00000239200			Rc3h1			protein_coding
Sox9_E11_Sample1_peak_2346	chr1	160980512	160981264	+	24	NA	exon (ENSMUST00000193477.1, exon 1 of 1)	protein_coding-exon (ENSMUST00000193477.1, exon 1 of 1)	2200	ENSMUST00000195760.1	ENSMUSG00000026715	ENSMUST00000195760			Serpinc1			protein_coding
Sox9_E11_Sample1_peak_2347	chr1	161034285	161035549	+	315	NA	promoter-TSS (ENSMUST00000065709.11)	lncRNA-promoter-TSS (ENSMUST00000065709.11)	-12	ENSMUST00000159119.7	ENSMUSG00000053332	ENSMUST00000160152			Gas5			lncRNA
Sox9_E11_Sample1_peak_2348	chr1	161039679	161040666	+	61	NA	promoter-TSS (ENSMUST00000195700.1)	lncRNA-promoter-TSS (ENSMUST00000195700.1)	-448	ENSMUST00000195700.1	ENSMUSG00000102864	ENSMUST00000195700			Gm37634			lncRNA
Sox9_E11_Sample1_peak_2349	chr1	161070237	161071493	+	375	NA	promoter-TSS (ENSMUST00000035430.3)	protein_coding-promoter-TSS (ENSMUST00000035430.3)	-27	ENSMUST00000192850.5	ENSMUSG00000026708	ENSMUST00000143486			Cenpl			protein_coding
Sox9_E11_Sample1_peak_2350	chr1	161130887	161131622	+	396	NA	intron (ENSMUST00000148952.7, intron 1 of 7)	protein_coding-intron (ENSMUST00000111611.7, intron 1 of 11)	174	ENSMUST00000117467.6	ENSMUSG00000026705	ENSMUST00000117467			Klhl20			protein_coding
Sox9_E11_Sample1_peak_2351	chr1	161142399	161143086	+	93	NA	promoter-TSS (ENSMUST00000052245.8)	protein_coding-promoter-TSS (ENSMUST00000052245.8)	2	ENSMUST00000150721.3	ENSMUSG00000044835	ENSMUST00000192384			Ankrd45			protein_coding
Sox9_E11_Sample1_peak_2352	chr1	161170303	161171175	+	90	NA	TTS (ENSMUST00000111608.7)	protein_coding-TTS (ENSMUST00000111608.7)	-6197	ENSMUST00000193379.1	ENSMUSG00000102817	ENSMUST00000193379			Gm6185			transcribed_unprocessed_pseudogene
Sox9_E11_Sample1_peak_2353	chr1	161195402	161196378	+	573	NA	intron (ENSMUST00000193379.1, intron 6 of 25)	transcribed_unprocessed_pseudogene-intron (ENSMUST00000193379.1, intron 6 of 25)	-4919	ENSMUST00000212885.1	ENSMUSG00000102817	ENSMUST00000193379			Gm6185			transcribed_unprocessed_pseudogene
Sox9_E11_Sample1_peak_2354	chr1	161249647	161251501	+	323	NA	promoter-TSS (ENSMUST00000139387.7)	protein_coding-promoter-TSS (ENSMUST00000139387.7)	-20	ENSMUST00000139387.7	ENSMUSG00000026701	ENSMUST00000156678			Prdx6			protein_coding
Sox9_E11_Sample1_peak_2356	chr1	161400133	161400544	+	26	NA	intron (ENSMUST00000028024.4, intron 1 of 2)	protein_coding-intron (ENSMUST00000028024.4, intron 1 of 2)	4929	ENSMUST00000028024.4	ENSMUSG00000026700	ENSMUST00000028024			Tnfsf4			protein_coding
Sox9_E11_Sample1_peak_2357	chr1	161444389	161445586	+	268	NA	Intergenic	Intergenic	49578	ENSMUST00000028024.4	ENSMUSG00000026700	ENSMUST00000028024			Tnfsf4			protein_coding
Sox9_E11_Sample1_peak_2358	chr1	161451453	161452449	+	192	NA	Intergenic	Intergenic	-42704	ENSMUST00000086084.1	ENSMUSG00000066755	ENSMUST00000086084			Tnfsf18			protein_coding
Sox9_E11_Sample1_peak_2359	chr1	161462275	161463138	+	48	NA	Intergenic	Intergenic	-31949	ENSMUST00000086084.1	ENSMUSG00000066755	ENSMUST00000086084			Tnfsf18			protein_coding
Sox9_E11_Sample1_peak_2360	chr1	161576002	161576554	+	85	NA	Intergenic	Intergenic	-23612	ENSMUST00000158728.1	ENSMUSG00000089353	ENSMUST00000158728			Gm25488			rRNA
Sox9_E11_Sample1_peak_2362	chr1	161712504	161713331	+	102	NA	promoter-TSS (ENSMUST00000194337.1)	TEC-promoter-TSS (ENSMUST00000194337.1)	-788	ENSMUST00000194337.1	ENSMUSG00000102860	ENSMUST00000194337			Gm37638			TEC
Sox9_E11_Sample1_peak_2364	chr1	161766037	161766807	+	76	NA	Intergenic	Intergenic	20366	ENSMUST00000195878.1	ENSMUSG00000102399	ENSMUST00000195878			Gm5049			processed_pseudogene
Sox9_E11_Sample1_peak_2365	chr1	161875943	161877709	+	535	NA	promoter-TSS (ENSMUST00000048377.10)	protein_coding-promoter-TSS (ENSMUST00000048377.10)	-144	ENSMUST00000048377.10	ENSMUSG00000040297	ENSMUST00000048377			Suco			protein_coding
Sox9_E11_Sample1_peak_2366	chr1	161913611	161914044	+	32	NA	Intergenic	Intergenic	21680	ENSMUST00000194266.1	ENSMUSG00000103158	ENSMUST00000193561			Gm31925			lncRNA
Sox9_E11_Sample1_peak_2367	chr1	161962183	161963224	+	333	NA	intron (ENSMUST00000141397.1, intron 3 of 6)	protein_coding-intron (ENSMUST00000141397.1, intron 3 of 6)	6445	ENSMUST00000141397.1	ENSMUSG00000086277	ENSMUST00000141397			4930558K02Rik			protein_coding
Sox9_E11_Sample1_peak_2368	chr1	161968869	161969737	+	240	NA	promoter-TSS (ENSMUST00000141397.1)	protein_coding-promoter-TSS (ENSMUST00000141397.1)	1	ENSMUST00000159648.1	ENSMUSG00000026698	ENSMUST00000160881			Pigc			protein_coding
Sox9_E11_Sample1_peak_2369	chr1	161976139	161976849	+	53	NA	intron (ENSMUST00000161826.1, intron 1 of 2)	lncRNA-intron (ENSMUST00000161826.1, intron 1 of 2)	3142	ENSMUST00000162676.1	ENSMUSG00000086277	ENSMUST00000141397			4930558K02Rik			protein_coding
Sox9_E11_Sample1_peak_2370	chr1	161999758	162000220	+	93	NA	intron (ENSMUST00000070330.13, intron 19 of 19)	protein_coding-intron (ENSMUST00000070330.13, intron 19 of 19)	-3975	ENSMUST00000193110.1	ENSMUSG00000040265	ENSMUST00000161155			Dnm3			protein_coding
Sox9_E11_Sample1_peak_2371	chr1	162004511	162005524	+	140	NA	promoter-TSS (ENSMUST00000160555.1)	lncRNA-promoter-TSS (ENSMUST00000160555.1)	48	ENSMUST00000161583.1	ENSMUSG00000090260	ENSMUST00000161583			2810442N19Rik			lncRNA
Sox9_E11_Sample1_peak_2372	chr1	162015007	162015742	+	92	NA	intron (ENSMUST00000086074.11, intron 18 of 20)	protein_coding-intron (ENSMUST00000070330.13, intron 17 of 19)	10202	ENSMUST00000160555.1	ENSMUSG00000090260	ENSMUST00000161583			2810442N19Rik			lncRNA
Sox9_E11_Sample1_peak_2374	chr1	162036109	162037877	+	126	NA	intron (ENSMUST00000159763.7, intron 5 of 8)	protein_coding-intron (ENSMUST00000070330.13, intron 16 of 19)	31821	ENSMUST00000160555.1	ENSMUSG00000090260	ENSMUST00000161583			2810442N19Rik			lncRNA
Sox9_E11_Sample1_peak_2375	chr1	162081567	162082888	+	263	NA	intron (ENSMUST00000086074.11, intron 16 of 20)	protein_coding-intron (ENSMUST00000070330.13, intron 16 of 19)	6241	ENSMUST00000193239.1	ENSMUSG00000102994	ENSMUST00000193239			Gm37767			TEC
Sox9_E11_Sample1_peak_2376	chr1	162305503	162305881	+	68	NA	intron (ENSMUST00000070330.13, intron 10 of 19)	protein_coding-intron (ENSMUST00000070330.13, intron 10 of 19)	7991	ENSMUST00000160173.1	ENSMUSG00000040265	ENSMUST00000161155			Dnm3			protein_coding
Sox9_E11_Sample1_peak_2377	chr1	162313500	162314041	+	85	NA	promoter-TSS (ENSMUST00000160173.1)	protein_coding-promoter-TSS (ENSMUST00000160173.1)	-87	ENSMUST00000160173.1	ENSMUSG00000040265	ENSMUST00000161155			Dnm3			protein_coding
Sox9_E11_Sample1_peak_2380	chr1	162477332	162478292	+	358	NA	exon (ENSMUST00000070330.13, exon 1 of 20)	protein_coding-exon (ENSMUST00000070330.13, exon 1 of 20)	132	ENSMUST00000159707.1	ENSMUSG00000066752	ENSMUST00000159707			Gm10176			TEC
Sox9_E11_Sample1_peak_2381	chr1	162547845	162548913	+	385	NA	promoter-TSS (ENSMUST00000176689.1)	protein_coding-promoter-TSS (ENSMUST00000176689.1)	-123	ENSMUST00000176689.1	ENSMUSG00000026694	ENSMUST00000159817			Eef1aknmt			protein_coding
Sox9_E11_Sample1_peak_2382	chr1	162570244	162571509	+	417	NA	promoter-TSS (ENSMUST00000050010.10)	protein_coding-promoter-TSS (ENSMUST00000050010.10)	39	ENSMUST00000150040.7	ENSMUSG00000026696	ENSMUST00000194810			Vamp4			protein_coding
Sox9_E11_Sample1_peak_2384	chr1	162665056	162666022	+	208	NA	Intergenic	Intergenic	-7320	ENSMUST00000169439.2	ENSMUSG00000091060	ENSMUST00000169439			Myocos			protein_coding
Sox9_E11_Sample1_peak_2385	chr1	162739568	162740904	+	368	NA	intron (ENSMUST00000182331.1, intron 1 of 5)	protein_coding-intron (ENSMUST00000028016.15, intron 1 of 34)	114	ENSMUST00000182331.1	ENSMUSG00000040225	ENSMUST00000028016			Prrc2c			protein_coding
Sox9_E11_Sample1_peak_2386	chr1	162771712	162772469	+	329	NA	Intergenic	Intergenic	-31534	ENSMUST00000182660.7	ENSMUSG00000040225	ENSMUST00000028016			Prrc2c			protein_coding
Sox9_E11_Sample1_peak_2387	chr1	162831952	162832710	+	174	NA	exon (ENSMUST00000193766.1, exon 1 of 1)	protein_coding-exon (ENSMUST00000193766.1, exon 1 of 1)	-1858	ENSMUST00000136120.1	ENSMUSG00000040181	ENSMUST00000136120			Fmo1			protein_coding
Sox9_E11_Sample1_peak_2389	chr1	163009377	163009883	+	53	NA	intron (ENSMUST00000195132.1, intron 2 of 3)	lncRNA-intron (ENSMUST00000195132.1, intron 2 of 3)	-25102	ENSMUST00000142759.1	ENSMUSG00000026691	ENSMUST00000142759			Fmo3			protein_coding
Sox9_E11_Sample1_peak_2390	chr1	163070475	163070953	+	46	NA	intron (ENSMUST00000096608.4, intron 7 of 21)	protein_coding-intron (ENSMUST00000096608.4, intron 7 of 21)	14956	ENSMUST00000096608.4	ENSMUSG00000071890	ENSMUST00000096608			Mroh9			protein_coding
Sox9_E11_Sample1_peak_2391	chr1	163150335	163150940	+	60	NA	Intergenic	Intergenic	32410	ENSMUST00000158549.1	ENSMUSG00000089174	ENSMUST00000158549			Gm22434			snoRNA
Sox9_E11_Sample1_peak_2392	chr1	163208959	163209787	+	60	NA	Intergenic	Intergenic	-70983	ENSMUST00000172793.1	ENSMUSG00000092188	ENSMUST00000172793			Gm20471			lncRNA
Sox9_E11_Sample1_peak_2393	chr1	163311866	163312771	+	187	NA	intron (ENSMUST00000174098.1, intron 1 of 1)	protein_coding-intron (ENSMUST00000027878.13, intron 1 of 3)	1350	ENSMUST00000174397.2	ENSMUSG00000026586	ENSMUST00000174397			Prrx1			protein_coding
Sox9_E11_Sample1_peak_2394	chr1	163403260	163404189	+	423	NA	promoter-TSS (ENSMUST00000045138.5)	protein_coding-promoter-TSS (ENSMUST00000045138.5)	-55	ENSMUST00000045138.5	ENSMUSG00000040124	ENSMUST00000185299			Gorab			protein_coding
Sox9_E11_Sample1_peak_2396	chr1	163561113	163561993	+	163	NA	Intergenic	Intergenic	-45824	ENSMUST00000185992.1	ENSMUSG00000101869	ENSMUST00000185992			Gm29500			lncRNA
Sox9_E11_Sample1_peak_2397	chr1	163657010	163657992	+	76	NA	Intergenic	Intergenic	33708	ENSMUST00000191040.1	ENSMUSG00000102117	ENSMUST00000191040			Rpsa-ps1			processed_pseudogene
Sox9_E11_Sample1_peak_2398	chr1	163724067	163725917	+	150	NA	exon (ENSMUST00000159679.7, exon 1 of 4)	protein_coding-exon (ENSMUST00000159679.7, exon 1 of 4)	240	ENSMUST00000159679.7	ENSMUSG00000040113	ENSMUST00000160495			Mettl11b			protein_coding
[truncated: 32,821 more rows]
