# Supplementary material for: PI3K signaling specifies proximal-distal fate by driving a developmental gene regulatory network in SOX9+ mouse lung progenitors
Source: eLife. 2022 Aug 17;11:e67954. doi: 10.7554/eLife.67954 (PMC9427112; doi:10.7554/eLife.67954)
Supplement: Supplementary file 3. [file elife-67954-supp3.xlsx]

## Sheet: Sheet1
Supplemental File 3. Annotated E16.5 ATAC-Seq Peaks
PeakID	Chr	Start	End	Strand	Peak Score	Focus Ratio/Region Size	Annotation	Detailed Annotation	Distance to TSS	Nearest PromoterID	Entrez ID	Nearest Unigene	Nearest Refseq	Nearest Ensembl	Gene Name	Gene Alias	Gene Description	Gene Type
Sox9_E16_Sample1_peak_254	chr1	3670662	3672496	+	620	NA	promoter-TSS (ENSMUST00000070533.4)	protein_coding-promoter-TSS (ENSMUST00000070533.4)	-81	ENSMUST00000070533.4	ENSMUSG00000051951	ENSMUST00000159265			Xkr4			protein_coding
Sox9_E16_Sample1_peak_255	chr1	3913237	3914135	+	315	NA	intron (ENSMUST00000194643.1, intron 2 of 2)	lncRNA-intron (ENSMUST00000194643.1, intron 2 of 2)	72298	ENSMUST00000192427.1	ENSMUSG00000102343	ENSMUST00000194643			Gm37381			lncRNA
Sox9_E16_Sample1_peak_257	chr1	4256869	4258484	+	51	NA	intron (ENSMUST00000195384.1, intron 1 of 1)	processed_pseudogene-intron (ENSMUST00000195384.1, intron 1 of 1)	2843	ENSMUST00000195384.1	ENSMUSG00000102948	ENSMUST00000195384			Gm6101			processed_pseudogene
Sox9_E16_Sample1_peak_258	chr1	4332262	4332974	+	64	NA	intron (ENSMUST00000208660.1, intron 3 of 29)	protein_coding-intron (ENSMUST00000194992.6, intron 3 of 3)	27696	ENSMUST00000027032.5	ENSMUSG00000025900	ENSMUST00000194992			Rp1			protein_coding
Sox9_E16_Sample1_peak_259	chr1	4412128	4412908	+	346	NA	Intergenic	Intergenic	-3277	ENSMUST00000208660.1	ENSMUSG00000025900	ENSMUST00000194992			Rp1			protein_coding
Sox9_E16_Sample1_peak_261	chr1	4491828	4493439	+	172	NA	exon (ENSMUST00000027035.9, exon 5 of 5)	protein_coding-exon (ENSMUST00000027035.9, exon 5 of 5)	971	ENSMUST00000192505.1	ENSMUSG00000025902	ENSMUST00000192505			Sox17			protein_coding
Sox9_E16_Sample1_peak_262	chr1	4496698	4497541	+	89	NA	promoter-TSS (ENSMUST00000027035.9)	protein_coding-promoter-TSS (ENSMUST00000027035.9)	235	ENSMUST00000192650.5	ENSMUSG00000025902	ENSMUST00000192505			Sox17			protein_coding
Sox9_E16_Sample1_peak_263	chr1	4571307	4572221	+	1411	NA	Intergenic	Intergenic	14488	ENSMUST00000195771.1	ENSMUSG00000104328	ENSMUST00000195771			Gm37323			lncRNA
Sox9_E16_Sample1_peak_265	chr1	4622312	4623557	+	313	NA	Intergenic	Intergenic	12463	ENSMUST00000192738.1	ENSMUSG00000102735	ENSMUST00000192738			Gm7369			processed_pseudogene
Sox9_E16_Sample1_peak_266	chr1	4644600	4645655	+	334	NA	Intergenic	Intergenic	34656	ENSMUST00000192738.1	ENSMUSG00000102735	ENSMUST00000192738			Gm7369			processed_pseudogene
Sox9_E16_Sample1_peak_267	chr1	4671265	4672186	+	107	NA	Intergenic	Intergenic	17678	ENSMUST00000182774.1	ENSMUSG00000098104	ENSMUST00000182774			Gm6085			processed_pseudogene
Sox9_E16_Sample1_peak_268	chr1	4722333	4722964	+	248	NA	TTS (ENSMUST00000157375.1)	snRNA-TTS (ENSMUST00000157375.1)	731	ENSMUST00000157375.1	ENSMUSG00000088000	ENSMUST00000157375			Gm25493			snRNA
Sox9_E16_Sample1_peak_270	chr1	4739403	4739741	+	51	NA	Intergenic	Intergenic	-3896	ENSMUST00000195671.1	ENSMUSG00000103265	ENSMUST00000195671			Gm2053			processed_pseudogene
Sox9_E16_Sample1_peak_271	chr1	4785091	4786226	+	1178	NA	promoter-TSS (ENSMUST00000045689.13)	protein_coding-promoter-TSS (ENSMUST00000045689.13)	34	ENSMUST00000132625.1	ENSMUSG00000033845	ENSMUST00000115538			Mrpl15			protein_coding
Sox9_E16_Sample1_peak_272	chr1	4807459	4808715	+	2145	NA	promoter-TSS (ENSMUST00000131119.1)	protein_coding-promoter-TSS (ENSMUST00000131119.1)	-150	ENSMUST00000131119.1	ENSMUSG00000025903	ENSMUST00000027036			Lypla1			protein_coding
Sox9_E16_Sample1_peak_273	chr1	4857095	4858601	+	1758	NA	promoter-TSS (ENSMUST00000081551.13)	protein_coding-promoter-TSS (ENSMUST00000081551.13)	34	ENSMUST00000081551.13	ENSMUSG00000033813	ENSMUST00000081551			Tcea1			protein_coding
Sox9_E16_Sample1_peak_274	chr1	5018818	5020084	+	194	NA	promoter-TSS (ENSMUST00000002533.14)	protein_coding-promoter-TSS (ENSMUST00000002533.14)	-72	ENSMUST00000170566.1	ENSMUSG00000002459	ENSMUST00000002533			Rgs20			protein_coding
Sox9_E16_Sample1_peak_275	chr1	5082790	5083618	+	1471	NA	promoter-TSS (ENSMUST00000192029.5)	protein_coding-promoter-TSS (ENSMUST00000192029.5)	40	ENSMUST00000192142.1	ENSMUSG00000033793	ENSMUST00000194676			Atp6v1h			protein_coding
Sox9_E16_Sample1_peak_276	chr1	5109525	5112095	+	813	NA	intron (ENSMUST00000192847.5, intron 7 of 12)	protein_coding-intron (ENSMUST00000044369.12, intron 7 of 13)	27646	ENSMUST00000192142.1	ENSMUSG00000033793	ENSMUST00000194676			Atp6v1h			protein_coding
Sox9_E16_Sample1_peak_277	chr1	5504641	5505804	+	318	NA	Intergenic	Intergenic	-83244	ENSMUST00000192685.1	ENSMUSG00000025905	ENSMUST00000160339			Oprk1			protein_coding
Sox9_E16_Sample1_peak_278	chr1	5588167	5589106	+	597	NA	promoter-TSS (ENSMUST00000027038.10)	protein_coding-promoter-TSS (ENSMUST00000027038.10)	79	ENSMUST00000027038.10	ENSMUSG00000025905	ENSMUST00000160339			Oprk1			protein_coding
Sox9_E16_Sample1_peak_279	chr1	5916219	5917915	+	239	NA	exon (ENSMUST00000044180.4, exon 1 of 1)	protein_coding-exon (ENSMUST00000044180.4, exon 1 of 1)	331	ENSMUST00000044180.4	ENSMUSG00000033774	ENSMUST00000044180			Npbwr1			protein_coding
Sox9_E16_Sample1_peak_280	chr1	6135034	6135184	+	45	NA	Intergenic	Intergenic	-71088	ENSMUST00000159906.7	ENSMUSG00000025907	ENSMUST00000162257			Rb1cc1			protein_coding
Sox9_E16_Sample1_peak_281	chr1	6152420	6152870	+	85	NA	Intergenic	Intergenic	-53552	ENSMUST00000159906.7	ENSMUSG00000025907	ENSMUST00000162257			Rb1cc1			protein_coding
Sox9_E16_Sample1_peak_282	chr1	6213889	6215424	+	2023	NA	promoter-TSS (ENSMUST00000027040.12)	protein_coding-promoter-TSS (ENSMUST00000027040.12)	-7	ENSMUST00000162210.7	ENSMUSG00000025907	ENSMUST00000162257			Rb1cc1			protein_coding
Sox9_E16_Sample1_peak_283	chr1	6251079	6251797	+	122	NA	TTS (ENSMUST00000159206.1)	protein_coding-TTS (ENSMUST00000159206.1)	1343	ENSMUST00000159661.7	ENSMUSG00000025907	ENSMUST00000162257			Rb1cc1			protein_coding
Sox9_E16_Sample1_peak_285	chr1	6282084	6282907	+	34	NA	Intergenic	Intergenic	11817	ENSMUST00000159656.1	ENSMUSG00000025907	ENSMUST00000162257			Rb1cc1			protein_coding
Sox9_E16_Sample1_peak_286	chr1	6286899	6288097	+	104	NA	Intergenic	Intergenic	16820	ENSMUST00000159656.1	ENSMUSG00000025907	ENSMUST00000162257			Rb1cc1			protein_coding
Sox9_E16_Sample1_peak_287	chr1	6357829	6358202	+	311	NA	Intergenic	Intergenic	-1203	ENSMUST00000133144.3	ENSMUSG00000087247	ENSMUST00000133144			Alkal1			protein_coding
Sox9_E16_Sample1_peak_287-2	chr1	6358592	6359698	+	311	NA	promoter-TSS (ENSMUST00000133144.3)	protein_coding-promoter-TSS (ENSMUST00000133144.3)	-73	ENSMUST00000133144.3	ENSMUSG00000087247	ENSMUST00000133144			Alkal1			protein_coding
Sox9_E16_Sample1_peak_288	chr1	6382628	6383592	+	733	NA	promoter-TSS (ENSMUST00000192950.1)	processed_pseudogene-promoter-TSS (ENSMUST00000192950.1)	-4	ENSMUST00000192950.1	ENSMUSG00000102706	ENSMUST00000192950			Gm7417			processed_pseudogene
Sox9_E16_Sample1_peak_289	chr1	6406257	6406911	+	87	NA	Intergenic	Intergenic	-23478	ENSMUST00000192950.1	ENSMUSG00000102706	ENSMUST00000192950			Gm7417			processed_pseudogene
Sox9_E16_Sample1_peak_290	chr1	6440897	6441847	+	339	NA	promoter-TSS (ENSMUST00000194240.1)	processed_pseudogene-promoter-TSS (ENSMUST00000194240.1)	-76	ENSMUST00000194240.1	ENSMUSG00000103845	ENSMUST00000194240			Gm19026			processed_pseudogene
Sox9_E16_Sample1_peak_291	chr1	6624148	6624510	+	39	NA	intron (ENSMUST00000131494.7, intron 2 of 22)	protein_coding-intron (ENSMUST00000131494.7, intron 2 of 22)	-105722	ENSMUST00000043578.12	ENSMUSG00000033740	ENSMUST00000139756			St18			protein_coding
Sox9_E16_Sample1_peak_292	chr1	6866452	6867703	+	417	NA	Intergenic	Intergenic	-2926	ENSMUST00000195780.2	ENSMUSG00000103329	ENSMUST00000195780			Gm42492			TEC
Sox9_E16_Sample1_peak_293	chr1	6973611	6974407	+	116	NA	Intergenic	Intergenic	-24208	ENSMUST00000193423.1	ENSMUSG00000102534	ENSMUST00000193423			Gm37225			processed_pseudogene
Sox9_E16_Sample1_peak_294	chr1	7088242	7089683	+	2661	NA	promoter-TSS (ENSMUST00000061280.16)	protein_coding-promoter-TSS (ENSMUST00000061280.16)	32	ENSMUST00000182114.7	ENSMUSG00000051285	ENSMUST00000182306			Pcmtd1			protein_coding
Sox9_E16_Sample1_peak_295	chr1	7206081	7207229	+	798	NA	Intergenic	Intergenic	-16736	ENSMUST00000195269.1	ENSMUSG00000103709	ENSMUST00000195269			Nras-ps2			processed_pseudogene
Sox9_E16_Sample1_peak_296	chr1	7397392	7398657	+	1922	NA	promoter-TSS (ENSMUST00000181554.1)	lncRNA-promoter-TSS (ENSMUST00000181554.1)	-155	ENSMUST00000193732.1	ENSMUSG00000097797	ENSMUST00000193428			Gm26901			lncRNA
Sox9_E16_Sample1_peak_297	chr1	7498431	7499569	+	166	NA	intron (ENSMUST00000194886.1, intron 1 of 2)	lncRNA-intron (ENSMUST00000194886.1, intron 1 of 2)	1032	ENSMUST00000194886.1	ENSMUSG00000103067	ENSMUST00000194886			Gm30414			lncRNA
Sox9_E16_Sample1_peak_298	chr1	7776931	7777926	+	88	NA	Intergenic	Intergenic	-46863	ENSMUST00000194872.1	ENSMUSG00000103557	ENSMUST00000194872			Gm38216			processed_pseudogene
Sox9_E16_Sample1_peak_299	chr1	9208909	9209159	+	34	NA	intron (ENSMUST00000140295.7, intron 1 of 20)	protein_coding-intron (ENSMUST00000126083.1, intron 2 of 4)	-16918	ENSMUST00000193635.1	ENSMUSG00000102316	ENSMUST00000193635			Gm37629			TEC
Sox9_E16_Sample1_peak_300	chr1	9237006	9237688	+	197	NA	intron (ENSMUST00000140295.7, intron 1 of 20)	protein_coding-intron (ENSMUST00000126083.1, intron 2 of 4)	21787	ENSMUST00000195333.1	ENSMUSG00000103819	ENSMUST00000195333			Gm38008			processed_pseudogene
Sox9_E16_Sample1_peak_301	chr1	9298356	9298835	+	28	NA	promoter-TSS (ENSMUST00000126083.1)	protein_coding-promoter-TSS (ENSMUST00000126083.1)	-22	ENSMUST00000132064.7	ENSMUSG00000025909	ENSMUST00000144593			Sntg1			protein_coding
Sox9_E16_Sample1_peak_303	chr1	9544848	9546486	+	1153	NA	exon (ENSMUST00000072079.8, exon 1 of 1)	protein_coding-exon (ENSMUST00000072079.8, exon 1 of 1)	259	ENSMUST00000072079.8	ENSMUSG00000061024	ENSMUST00000072079			Rrs1			protein_coding
Sox9_E16_Sample1_peak_304	chr1	9564439	9564981	+	78	NA	intron (ENSMUST00000190654.1, intron 12 of 14)	protein_coding-intron (ENSMUST00000027044.14, intron 11 of 12)	-9838	ENSMUST00000121942.1	ENSMUSG00000081441	ENSMUST00000121942			Gm6161			processed_pseudogene
Sox9_E16_Sample1_peak_305	chr1	9573192	9573649	+	23	NA	intron (ENSMUST00000027044.14, intron 12 of 12)	protein_coding-intron (ENSMUST00000027044.14, intron 12 of 12)	-1128	ENSMUST00000121942.1	ENSMUSG00000081441	ENSMUST00000121942			Gm6161			processed_pseudogene
Sox9_E16_Sample1_peak_307	chr1	9638527	9639570	+	146	NA	TTS (ENSMUST00000191209.1)	lncRNA-TTS (ENSMUST00000191209.1)	1534	ENSMUST00000191209.1	ENSMUSG00000099827	ENSMUST00000191209			Gm29520			lncRNA
Sox9_E16_Sample1_peak_308	chr1	9699725	9701139	+	1735	NA	promoter-TSS (ENSMUST00000088658.10)	protein_coding-promoter-TSS (ENSMUST00000088658.10)	-223	ENSMUST00000088658.10	ENSMUSG00000025912	ENSMUST00000160022			Mybl1			protein_coding
Sox9_E16_Sample1_peak_309	chr1	9747496	9748868	+	1581	NA	promoter-TSS (ENSMUST00000189431.1)	lncRNA-promoter-TSS (ENSMUST00000189431.1)	200	ENSMUST00000057438.6	ENSMUSG00000045210	ENSMUST00000057438			Vcpip1			protein_coding
Sox9_E16_Sample1_peak_310	chr1	9755273	9756432	+	107	NA	intron (ENSMUST00000181821.7, intron 2 of 3)	lncRNA-intron (ENSMUST00000181358.7, intron 2 of 6)	7226	ENSMUST00000209020.1	ENSMUSG00000097893	ENSMUST00000191287			1700034P13Rik			lncRNA
Sox9_E16_Sample1_peak_311	chr1	9772912	9773675	+	822	NA	intron (ENSMUST00000181821.7, intron 2 of 3)	lncRNA-intron (ENSMUST00000181358.7, intron 2 of 6)	-10485	ENSMUST00000189322.1	ENSMUSG00000097893	ENSMUST00000191287			1700034P13Rik			lncRNA
Sox9_E16_Sample1_peak_312	chr1	9797804	9799100	+	409	NA	intron (ENSMUST00000166384.7, intron 1 of 16)	protein_coding-intron (ENSMUST00000166384.7, intron 1 of 16)	244	ENSMUST00000188298.6	ENSMUSG00000025915	ENSMUST00000168907			Sgk3			protein_coding
Sox9_E16_Sample1_peak_313	chr1	9817313	9817714	+	51	NA	intron (ENSMUST00000166384.7, intron 1 of 16)	protein_coding-intron (ENSMUST00000166384.7, intron 1 of 16)	-14960	ENSMUST00000063059.4	ENSMUSG00000046334	ENSMUST00000063059			Gm6195			processed_pseudogene
Sox9_E16_Sample1_peak_314	chr1	9847700	9848997	+	754	NA	promoter-TSS (ENSMUST00000097826.5)	protein_coding-promoter-TSS (ENSMUST00000097826.5)	27	ENSMUST00000188830.6	ENSMUSG00000025915	ENSMUST00000168907			Sgk3			protein_coding
Sox9_E16_Sample1_peak_315	chr1	9908559	9909046	+	172	NA	intron (ENSMUST00000125294.8, intron 1 of 13)	protein_coding-intron (ENSMUST00000052843.11, intron 1 of 9)	132	ENSMUST00000140948.8	ENSMUSG00000046101	ENSMUST00000125294			Mcmdc2			protein_coding
Sox9_E16_Sample1_peak_316	chr1	9943384	9944614	+	708	NA	promoter-TSS (ENSMUST00000182819.7)	lncRNA-promoter-TSS (ENSMUST00000182819.7)	104	ENSMUST00000182498.7	ENSMUSG00000098234	ENSMUST00000182580			Snhg6			lncRNA
Sox9_E16_Sample1_peak_317	chr1	9967052	9968547	+	283	NA	TTS (ENSMUST00000027049.9)	protein_coding-TTS (ENSMUST00000027049.9)	133	ENSMUST00000185184.1	ENSMUSG00000099032	ENSMUST00000097824			Tcf24			protein_coding
Sox9_E16_Sample1_peak_318	chr1	10008737	10009410	+	370	NA	promoter-TSS (ENSMUST00000027049.9)	protein_coding-promoter-TSS (ENSMUST00000027049.9)	57	ENSMUST00000130102.7	ENSMUSG00000025916	ENSMUST00000027049			Ppp1r42			protein_coding
Sox9_E16_Sample1_peak_319	chr1	10037544	10038421	+	594	NA	promoter-TSS (ENSMUST00000071087.11)	protein_coding-promoter-TSS (ENSMUST00000071087.11)	-5	ENSMUST00000190610.1	ENSMUSG00000056763	ENSMUST00000190610			Cspp1			protein_coding
Sox9_E16_Sample1_peak_320	chr1	10039181	10040269	+	1428	NA	promoter-TSS (ENSMUST00000118263.7)	protein_coding-promoter-TSS (ENSMUST00000118263.7)	-42	ENSMUST00000191521.6	ENSMUSG00000056763	ENSMUST00000190610			Cspp1			protein_coding
Sox9_E16_Sample1_peak_323	chr1	10169777	10170657	+	196	NA	intron (ENSMUST00000088615.10, intron 21 of 37)	protein_coding-intron (ENSMUST00000088615.10, intron 21 of 37)	3678	ENSMUST00000157528.1	ENSMUSG00000088153	ENSMUST00000157528			Gm26348			misc_RNA
Sox9_E16_Sample1_peak_324	chr1	10232140	10233734	+	940	NA	promoter-TSS (ENSMUST00000088615.10)	protein_coding-promoter-TSS (ENSMUST00000088615.10)	-267	ENSMUST00000131556.1	ENSMUSG00000067851	ENSMUST00000088615			Arfgef1			protein_coding
Sox9_E16_Sample1_peak_325	chr1	10256575	10257674	+	381	NA	Intergenic	Intergenic	-24454	ENSMUST00000131556.1	ENSMUSG00000067851	ENSMUST00000088615			Arfgef1			protein_coding
Sox9_E16_Sample1_peak_326	chr1	10284945	10286308	+	1391	NA	Intergenic	Intergenic	-52956	ENSMUST00000131556.1	ENSMUSG00000067851	ENSMUST00000088615			Arfgef1			protein_coding
Sox9_E16_Sample1_peak_327	chr1	10300242	10301449	+	224	NA	Intergenic	Intergenic	-68175	ENSMUST00000131556.1	ENSMUSG00000067851	ENSMUST00000088615			Arfgef1			protein_coding
Sox9_E16_Sample1_peak_328	chr1	10337425	10338459	+	194	NA	intron (ENSMUST00000153695.7, intron 7 of 9)	protein_coding-intron (ENSMUST00000035577.6, intron 8 of 10)	-105272	ENSMUST00000131556.1	ENSMUSG00000067851	ENSMUST00000088615			Arfgef1			protein_coding
Sox9_E16_Sample1_peak_329	chr1	10397004	10397944	+	78	NA	intron (ENSMUST00000153695.7, intron 7 of 9)	protein_coding-intron (ENSMUST00000035577.6, intron 8 of 10)	54515	ENSMUST00000194845.1	ENSMUSG00000103810	ENSMUST00000194845			Gm38005			TEC
Sox9_E16_Sample1_peak_330	chr1	10681008	10681675	+	88	NA	intron (ENSMUST00000153695.7, intron 1 of 9)	protein_coding-intron (ENSMUST00000035577.6, intron 1 of 10)	-13782	ENSMUST00000119252.1	ENSMUSG00000081417	ENSMUST00000119252			Gm15603			processed_pseudogene
Sox9_E16_Sample1_peak_331	chr1	10719595	10720789	+	66	NA	promoter-TSS (ENSMUST00000035577.6)	protein_coding-promoter-TSS (ENSMUST00000035577.6)	-247	ENSMUST00000153695.7	ENSMUSG00000042501	ENSMUST00000035577			Cpa6			protein_coding
Sox9_E16_Sample1_peak_332	chr1	10743341	10744384	+	248	NA	Intergenic	Intergenic	-23917	ENSMUST00000153695.7	ENSMUSG00000042501	ENSMUST00000035577			Cpa6			protein_coding
Sox9_E16_Sample1_peak_333	chr1	10759436	10759829	+	114	NA	Intergenic	Intergenic	24745	ENSMUST00000192705.1	ENSMUSG00000103448	ENSMUST00000192705			Gm37133			TEC
Sox9_E16_Sample1_peak_334	chr1	10835882	10836263	+	58	NA	Intergenic	Intergenic	30791	ENSMUST00000189483.1	ENSMUSG00000100212	ENSMUST00000189483			Gm5522			processed_pseudogene
Sox9_E16_Sample1_peak_335	chr1	10849045	10849860	+	175	NA	Intergenic	Intergenic	-19236	ENSMUST00000188013.1	ENSMUSG00000100648	ENSMUST00000188013			Gm28659			processed_pseudogene
Sox9_E16_Sample1_peak_336	chr1	10932428	10933519	+	661	NA	Intergenic	Intergenic	11303	ENSMUST00000157960.1	ENSMUSG00000088585	ENSMUST00000157960			Gm22963			snoRNA
Sox9_E16_Sample1_peak_337	chr1	10993163	10994461	+	980	NA	exon (ENSMUST00000027056.11, exon 1 of 40)	protein_coding-exon (ENSMUST00000027056.11, exon 1 of 40)	294	ENSMUST00000190935.1	ENSMUSG00000048960	ENSMUST00000189822			Prex2			protein_coding
Sox9_E16_Sample1_peak_338	chr1	11065390	11065610	+	122	NA	intron (ENSMUST00000027056.11, intron 2 of 39)	protein_coding-intron (ENSMUST00000027056.11, intron 2 of 39)	-33030	ENSMUST00000189822.1	ENSMUSG00000048960	ENSMUST00000189822			Prex2			protein_coding
Sox9_E16_Sample1_peak_339	chr1	11329222	11330453	+	294	NA	Intergenic	Intergenic	37127	ENSMUST00000193623.1	ENSMUSG00000103494	ENSMUST00000193623			Gm37410			TEC
Sox9_E16_Sample1_peak_340	chr1	11413633	11414836	+	725	NA	promoter-TSS (ENSMUST00000135014.7)	protein_coding-promoter-TSS (ENSMUST00000135014.7)	-35	ENSMUST00000135014.7	ENSMUSG00000057715	ENSMUST00000137824			A830018L16Rik			protein_coding
Sox9_E16_Sample1_peak_341	chr1	11595314	11596081	+	211	NA	intron (ENSMUST00000191437.1, intron 2 of 2)	protein_coding-intron (ENSMUST00000048613.13, intron 6 of 13)	12703	ENSMUST00000188880.1	ENSMUSG00000099845	ENSMUST00000188880			Gm29273			processed_pseudogene
Sox9_E16_Sample1_peak_343	chr1	12000054	12001033	+	182	NA	Intergenic	Intergenic	-120417	ENSMUST00000187748.1	ENSMUSG00000101610	ENSMUST00000187748			Gm7560			processed_pseudogene
Sox9_E16_Sample1_peak_345	chr1	12287662	12288693	+	91	NA	Intergenic	Intergenic	-86759	ENSMUST00000179834.1	ENSMUSG00000093864	ENSMUST00000179834			Gm22633			snRNA
Sox9_E16_Sample1_peak_346	chr1	12295860	12296240	+	107	NA	Intergenic	Intergenic	-78886	ENSMUST00000179834.1	ENSMUSG00000093864	ENSMUST00000179834			Gm22633			snRNA
Sox9_E16_Sample1_peak_347	chr1	12398259	12398734	+	34	NA	Intergenic	Intergenic	23560	ENSMUST00000179834.1	ENSMUSG00000093864	ENSMUST00000179834			Gm22633			snRNA
Sox9_E16_Sample1_peak_349	chr1	12478993	12479585	+	64	NA	Intergenic	Intergenic	53303	ENSMUST00000183490.1	ENSMUSG00000098555	ENSMUST00000183490			Mir6341			miRNA
Sox9_E16_Sample1_peak_350	chr1	12572209	12573353	+	156	NA	Intergenic	Intergenic	7204	ENSMUST00000181461.1	ENSMUSG00000097628	ENSMUST00000181461			Gm2383			processed_pseudogene
Sox9_E16_Sample1_peak_351	chr1	12620673	12621389	+	51	NA	Intergenic	Intergenic	-34836	ENSMUST00000182390.1	ENSMUSG00000098163	ENSMUST00000182390			Gm6216			processed_pseudogene
Sox9_E16_Sample1_peak_353	chr1	12670384	12671078	+	78	NA	exon (ENSMUST00000186962.1, exon 1 of 1)	lncRNA-exon (ENSMUST00000186962.1, exon 1 of 1)	445	ENSMUST00000186962.1	ENSMUSG00000101314	ENSMUST00000186962			Gm29663			lncRNA
Sox9_E16_Sample1_peak_354	chr1	12683970	12684333	+	107	NA	Intergenic	Intergenic	-8126	ENSMUST00000177608.7	ENSMUSG00000016918	ENSMUST00000189541			Sulf1			protein_coding
Sox9_E16_Sample1_peak_355	chr1	12691919	12693253	+	481	NA	promoter-TSS (ENSMUST00000186051.6)	protein_coding-promoter-TSS (ENSMUST00000186051.6)	54	ENSMUST00000186051.6	ENSMUSG00000016918	ENSMUST00000189541			Sulf1			protein_coding
Sox9_E16_Sample1_peak_357	chr1	12718096	12719042	+	114	NA	promoter-TSS (ENSMUST00000088585.9)	protein_coding-promoter-TSS (ENSMUST00000088585.9)	40	ENSMUST00000088585.9	ENSMUSG00000016918	ENSMUST00000189541			Sulf1			protein_coding
Sox9_E16_Sample1_peak_358	chr1	12744614	12745228	+	71	NA	intron (ENSMUST00000088585.9, intron 2 of 21)	protein_coding-intron (ENSMUST00000088585.9, intron 2 of 21)	16802	ENSMUST00000186405.6	ENSMUSG00000016918	ENSMUST00000189541			Sulf1			protein_coding
Sox9_E16_Sample1_peak_359	chr1	12835607	12837041	+	228	NA	exon (ENSMUST00000088585.9, exon 13 of 22)	protein_coding-exon (ENSMUST00000088585.9, exon 13 of 22)	296	ENSMUST00000189447.1	ENSMUSG00000016918	ENSMUST00000189541			Sulf1			protein_coding
Sox9_E16_Sample1_peak_360	chr1	12863850	12864548	+	92	NA	Intergenic	Intergenic	21408	ENSMUST00000185780.1	ENSMUSG00000016918	ENSMUST00000189541			Sulf1			protein_coding
Sox9_E16_Sample1_peak_360-2	chr1	12865094	12865558	+	92	NA	Intergenic	Intergenic	22535	ENSMUST00000185780.1	ENSMUSG00000016918	ENSMUST00000189541			Sulf1			protein_coding
Sox9_E16_Sample1_peak_361	chr1	12875436	12876450	+	184	NA	intron (ENSMUST00000115402.7, intron 7 of 7)	protein_coding-intron (ENSMUST00000115402.7, intron 7 of 7)	33152	ENSMUST00000185780.1	ENSMUSG00000016918	ENSMUST00000189541			Sulf1			protein_coding
Sox9_E16_Sample1_peak_362	chr1	12947082	12948215	+	185	NA	intron (ENSMUST00000188454.6, intron 2 of 9)	protein_coding-intron (ENSMUST00000115402.7, intron 1 of 7)	-22605	ENSMUST00000133201.2	ENSMUSG00000025938	ENSMUST00000146763			Slco5a1			protein_coding
Sox9_E16_Sample1_peak_363	chr1	12990405	12992844	+	538	NA	promoter-TSS (ENSMUST00000115402.7)	protein_coding-promoter-TSS (ENSMUST00000115402.7)	-447	ENSMUST00000115402.7	ENSMUSG00000025938	ENSMUST00000146763			Slco5a1			protein_coding
Sox9_E16_Sample1_peak_364	chr1	13050354	13050641	+	130	NA	Intergenic	Intergenic	9454	ENSMUST00000191708.1	ENSMUSG00000104518	ENSMUST00000191708			Gm37162			TEC
Sox9_E16_Sample1_peak_366	chr1	13103642	13104313	+	126	NA	Intergenic	Intergenic	23186	ENSMUST00000047577.6	ENSMUSG00000042414	ENSMUST00000047577			Prdm14			protein_coding
Sox9_E16_Sample1_peak_367	chr1	13127120	13128666	+	33	NA	promoter-TSS (ENSMUST00000047577.6)	protein_coding-promoter-TSS (ENSMUST00000047577.6)	-730	ENSMUST00000047577.6	ENSMUSG00000042414	ENSMUST00000047577			Prdm14			protein_coding
Sox9_E16_Sample1_peak_369	chr1	13244121	13245218	+	328	NA	intron (ENSMUST00000145280.1, intron 1 of 3)	protein_coding-intron (ENSMUST00000139970.7, intron 2 of 6)	-8235	ENSMUST00000195811.1	ENSMUSG00000103495	ENSMUST00000195811			Gm37409			TEC
Sox9_E16_Sample1_peak_370	chr1	13266456	13267033	+	294	NA	intron (ENSMUST00000145280.1, intron 1 of 3)	protein_coding-intron (ENSMUST00000006037.12, intron 2 of 22)	4546	ENSMUST00000183805.1	ENSMUSG00000099183	ENSMUST00000183805			Gm27881			miRNA
Sox9_E16_Sample1_peak_371	chr1	13277947	13278663	+	191	NA	intron (ENSMUST00000145280.1, intron 1 of 3)	protein_coding-intron (ENSMUST00000006037.12, intron 2 of 22)	12201	ENSMUST00000194484.1	ENSMUSG00000102639	ENSMUST00000194484			Gm38223			TEC
Sox9_E16_Sample1_peak_372	chr1	13291123	13291821	+	331	NA	promoter-TSS (ENSMUST00000194484.1)	TEC-promoter-TSS (ENSMUST00000194484.1)	-966	ENSMUST00000194484.1	ENSMUSG00000102639	ENSMUST00000194484			Gm38223			TEC
Sox9_E16_Sample1_peak_373	chr1	13300382	13301482	+	480	NA	intron (ENSMUST00000143603.7, intron 1 of 12)	protein_coding-intron (ENSMUST00000143603.7, intron 1 of 12)	-1210	ENSMUST00000145280.1	ENSMUSG00000005886	ENSMUST00000146784			Ncoa2			protein_coding
Sox9_E16_Sample1_peak_374	chr1	13313972	13314819	+	117	NA	intron (ENSMUST00000143603.7, intron 1 of 12)	protein_coding-intron (ENSMUST00000143603.7, intron 1 of 12)	-14673	ENSMUST00000145280.1	ENSMUSG00000005886	ENSMUST00000146784			Ncoa2			protein_coding
Sox9_E16_Sample1_peak_375	chr1	13321868	13322406	+	34	NA	intron (ENSMUST00000143603.7, intron 1 of 12)	protein_coding-intron (ENSMUST00000143603.7, intron 1 of 12)	12472	ENSMUST00000157157.1	ENSMUSG00000087782	ENSMUST00000157157			Gm23169			snRNA
Sox9_E16_Sample1_peak_376	chr1	13364510	13365108	+	117	NA	intron (ENSMUST00000143603.7, intron 1 of 12)	protein_coding-intron (ENSMUST00000006037.12, intron 1 of 22)	7620	ENSMUST00000139970.7	ENSMUSG00000005886	ENSMUST00000146784			Ncoa2			protein_coding
Sox9_E16_Sample1_peak_377	chr1	13372186	13374465	+	1479	NA	promoter-TSS (ENSMUST00000081713.10)	protein_coding-promoter-TSS (ENSMUST00000081713.10)	704	ENSMUST00000143603.7	ENSMUSG00000005886	ENSMUST00000146784			Ncoa2			protein_coding
Sox9_E16_Sample1_peak_378	chr1	13426372	13427398	+	273	NA	Intergenic	Intergenic	-19230	ENSMUST00000187246.1	ENSMUSG00000101171	ENSMUST00000187246			Gm7593			processed_pseudogene
Sox9_E16_Sample1_peak_379	chr1	13496104	13496859	+	159	NA	Intergenic	Intergenic	83317	ENSMUST00000185447.1	ENSMUSG00000025935	ENSMUST00000027068			Tram1			protein_coding
Sox9_E16_Sample1_peak_380	chr1	13561423	13562095	+	85	NA	Intergenic	Intergenic	18039	ENSMUST00000185447.1	ENSMUSG00000025935	ENSMUST00000027068			Tram1			protein_coding
Sox9_E16_Sample1_peak_381	chr1	13589044	13590348	+	623	NA	exon (ENSMUST00000027068.10, exon 1 of 11)	protein_coding-exon (ENSMUST00000027068.10, exon 1 of 11)	179	ENSMUST00000188377.1	ENSMUSG00000025935	ENSMUST00000027068			Tram1			protein_coding
Sox9_E16_Sample1_peak_382	chr1	13598919	13600179	+	228	NA	Intergenic	Intergenic	-9639	ENSMUST00000027068.10	ENSMUSG00000025935	ENSMUST00000027068			Tram1			protein_coding
Sox9_E16_Sample1_peak_383	chr1	13608406	13608908	+	107	NA	Intergenic	Intergenic	-18747	ENSMUST00000027068.10	ENSMUSG00000025935	ENSMUST00000027068			Tram1			protein_coding
Sox9_E16_Sample1_peak_384	chr1	13621647	13622352	+	99	NA	Intergenic	Intergenic	16412	ENSMUST00000156222.1	ENSMUSG00000025937	ENSMUST00000027071			Lactb2			protein_coding
Sox9_E16_Sample1_peak_385	chr1	13643012	13643659	+	235	NA	promoter-TSS (ENSMUST00000194537.1)	TEC-promoter-TSS (ENSMUST00000194537.1)	-587	ENSMUST00000194537.1	ENSMUSG00000102982	ENSMUST00000194537			Gm38319			TEC
Sox9_E16_Sample1_peak_386	chr1	13658690	13660874	+	746	NA	intron (ENSMUST00000027071.6, intron 1 of 6)	protein_coding-intron (ENSMUST00000027071.6, intron 1 of 6)	764	ENSMUST00000027071.6	ENSMUSG00000025937	ENSMUST00000027071			Lactb2			protein_coding
Sox9_E16_Sample1_peak_388	chr1	13771339	13772122	+	122	NA	Intergenic	Intergenic	2734	ENSMUST00000104180.1	ENSMUSG00000077368	ENSMUST00000104180			Gm26273			snoRNA
Sox9_E16_Sample1_peak_390	chr1	14001153	14002246	+	233	NA	Intergenic	Intergenic	69321	ENSMUST00000158733.1	ENSMUSG00000089358	ENSMUST00000158733			Gm25491			misc_RNA
Sox9_E16_Sample1_peak_391	chr1	14139380	14140417	+	818	NA	Intergenic	Intergenic	-27079	ENSMUST00000193148.1	ENSMUSG00000104209	ENSMUST00000193148			Gm37400			TEC
Sox9_E16_Sample1_peak_392	chr1	14150410	14151608	+	449	NA	Intergenic	Intergenic	-31569	ENSMUST00000179783.1	ENSMUSG00000095853	ENSMUST00000179783			Gm22616			miRNA
Sox9_E16_Sample1_peak_393	chr1	14181387	14182172	+	226	NA	promoter-TSS (ENSMUST00000179783.1)	miRNA-promoter-TSS (ENSMUST00000179783.1)	-799	ENSMUST00000179783.1	ENSMUSG00000095853	ENSMUST00000179783			Gm22616			miRNA
Sox9_E16_Sample1_peak_394	chr1	14202335	14202796	+	85	NA	intron (ENSMUST00000168081.8, intron 12 of 17)	protein_coding-intron (ENSMUST00000027066.12, intron 12 of 17)	19987	ENSMUST00000179783.1	ENSMUSG00000095853	ENSMUST00000179783			Gm22616			miRNA
Sox9_E16_Sample1_peak_395	chr1	14222973	14224051	+	510	NA	intron (ENSMUST00000027066.12, intron 11 of 17)	protein_coding-intron (ENSMUST00000027066.12, intron 11 of 17)	7980	ENSMUST00000189526.1	ENSMUSG00000025932	ENSMUST00000188857			Eya1			protein_coding
Sox9_E16_Sample1_peak_396	chr1	14273727	14274547	+	181	NA	exon (ENSMUST00000027066.12, exon 6 of 18)	protein_coding-exon (ENSMUST00000027066.12, exon 6 of 18)	-18147	ENSMUST00000193605.1	ENSMUSG00000102588	ENSMUST00000193605			Gm37444			TEC
Sox9_E16_Sample1_peak_397	chr1	14292178	14293890	+	201	NA	intron (ENSMUST00000188857.6, intron 1 of 6)	protein_coding-intron (ENSMUST00000027066.12, intron 3 of 17)	11536	ENSMUST00000190337.6	ENSMUSG00000025932	ENSMUST00000188857			Eya1			protein_coding
Sox9_E16_Sample1_peak_398	chr1	14309286	14310644	+	693	NA	promoter-TSS (ENSMUST00000185329.1)	protein_coding-promoter-TSS (ENSMUST00000185329.1)	86	ENSMUST00000185329.1	ENSMUSG00000025932	ENSMUST00000188857			Eya1			protein_coding
Sox9_E16_Sample1_peak_399	chr1	14467043	14467475	+	80	NA	Intergenic	Intergenic	-157024	ENSMUST00000168081.8	ENSMUSG00000025932	ENSMUST00000188857			Eya1			protein_coding
Sox9_E16_Sample1_peak_400	chr1	14506320	14507417	+	460	NA	Intergenic	Intergenic	-196633	ENSMUST00000168081.8	ENSMUSG00000025932	ENSMUST00000188857			Eya1			protein_coding
Sox9_E16_Sample1_peak_402	chr1	14709335	14710718	+	376	NA	Intergenic	Intergenic	-42911	ENSMUST00000187401.1	ENSMUSG00000054493	ENSMUST00000067599			Gm9947			lncRNA
Sox9_E16_Sample1_peak_403	chr1	14755101	14756486	+	412	NA	promoter-TSS (ENSMUST00000190719.1)	protein_coding-promoter-TSS (ENSMUST00000190719.1)	197	ENSMUST00000027062.6	ENSMUSG00000025930	ENSMUST00000190471			Msc			protein_coding
Sox9_E16_Sample1_peak_404	chr1	14795241	14795898	+	64	NA	Intergenic	Intergenic	6924	ENSMUST00000194866.1	ENSMUSG00000103492	ENSMUST00000194866			Gm37412			TEC
Sox9_E16_Sample1_peak_405	chr1	14800335	14801002	+	286	NA	Intergenic	Intergenic	12023	ENSMUST00000194866.1	ENSMUSG00000103492	ENSMUST00000194866			Gm37412			TEC
Sox9_E16_Sample1_peak_406	chr1	14823091	14824102	+	176	NA	Intergenic	Intergenic	16560	ENSMUST00000121569.1	ENSMUSG00000081201	ENSMUST00000121569			Smt3h2-ps4			processed_pseudogene
Sox9_E16_Sample1_peak_407	chr1	14869368	14869882	+	39	NA	Intergenic	Intergenic	4553	ENSMUST00000121367.1	ENSMUSG00000082193	ENSMUST00000121367			Rpl5-ps1			processed_pseudogene
Sox9_E16_Sample1_peak_408	chr1	14918223	14919015	+	194	NA	intron (ENSMUST00000235071.1, intron 1 of 25)	protein_coding-intron (ENSMUST00000041447.4, intron 1 of 26)	216	ENSMUST00000235071.1	ENSMUSG00000032769	ENSMUST00000235071			Trpa1			protein_coding
Sox9_E16_Sample1_peak_410	chr1	15017849	15018155	+	34	NA	Intergenic	Intergenic	1157	ENSMUST00000157534.1	ENSMUSG00000088159	ENSMUST00000157534			Gm26345			snoRNA
Sox9_E16_Sample1_peak_411	chr1	15143628	15144852	+	949	NA	Intergenic	Intergenic	-125081	ENSMUST00000157534.1	ENSMUSG00000088159	ENSMUST00000157534			Gm26345			snoRNA
Sox9_E16_Sample1_peak_412	chr1	15286254	15287530	+	1429	NA	promoter-TSS (ENSMUST00000175681.2)	protein_coding-promoter-TSS (ENSMUST00000175681.2)	-362	ENSMUST00000175681.2	ENSMUSG00000092083	ENSMUST00000170146			Kcnb2			protein_coding
Sox9_E16_Sample1_peak_413	chr1	15307082	15308002	+	165	NA	intron (ENSMUST00000175681.2, intron 1 of 2)	protein_coding-intron (ENSMUST00000175681.2, intron 1 of 2)	-4910	ENSMUST00000170146.2	ENSMUSG00000092083	ENSMUST00000170146			Kcnb2			protein_coding
Sox9_E16_Sample1_peak_415	chr1	15446621	15447328	+	172	NA	intron (ENSMUST00000175681.2, intron 2 of 2)	protein_coding-intron (ENSMUST00000170146.2, intron 1 of 1)	82672	ENSMUST00000193873.1	ENSMUSG00000102937	ENSMUST00000193873			Gm38116			TEC
Sox9_E16_Sample1_peak_416	chr1	15455611	15456670	+	271	NA	intron (ENSMUST00000175681.2, intron 2 of 2)	protein_coding-intron (ENSMUST00000170146.2, intron 1 of 1)	91838	ENSMUST00000193873.1	ENSMUSG00000102937	ENSMUST00000193873			Gm38116			TEC
Sox9_E16_Sample1_peak_417	chr1	15475124	15475411	+	51	NA	intron (ENSMUST00000175681.2, intron 2 of 2)	protein_coding-intron (ENSMUST00000170146.2, intron 1 of 1)	-80982	ENSMUST00000194564.1	ENSMUSG00000104149	ENSMUST00000194564			Gm37138			TEC
Sox9_E16_Sample1_peak_419	chr1	15558426	15559260	+	318	NA	TTS (ENSMUST00000194564.1)	TEC-TTS (ENSMUST00000194564.1)	2594	ENSMUST00000194564.1	ENSMUSG00000104149	ENSMUST00000194564			Gm37138			TEC
Sox9_E16_Sample1_peak_422	chr1	15651974	15652545	+	78	NA	intron (ENSMUST00000175681.2, intron 2 of 2)	protein_coding-intron (ENSMUST00000170146.2, intron 1 of 1)	33787	ENSMUST00000158204.1	ENSMUSG00000088829	ENSMUST00000158204			Gm25227			snoRNA
Sox9_E16_Sample1_peak_424	chr1	15771121	15771515	+	92	NA	Intergenic	Intergenic	10557	ENSMUST00000188400.1	ENSMUSG00000100814	ENSMUST00000188400			Gm28669			processed_pseudogene
Sox9_E16_Sample1_peak_425	chr1	15791492	15792136	+	225	NA	Intergenic	Intergenic	-13832	ENSMUST00000188371.6	ENSMUSG00000025925	ENSMUST00000027057			Terf1			protein_coding
Sox9_E16_Sample1_peak_426	chr1	15805274	15806491	+	1693	NA	exon (ENSMUST00000027057.7, exon 1 of 9)	protein_coding-exon (ENSMUST00000027057.7, exon 1 of 9)	218	ENSMUST00000027057.7	ENSMUSG00000025925	ENSMUST00000027057			Terf1			protein_coding
Sox9_E16_Sample1_peak_427	chr1	15877138	15877394	+	58	NA	intron (ENSMUST00000040695.4, intron 2 of 4)	protein_coding-intron (ENSMUST00000040695.4, intron 2 of 4)	-2264	ENSMUST00000158318.1	ENSMUSG00000088943	ENSMUST00000158318			Gm23259			misc_RNA
Sox9_E16_Sample1_peak_428	chr1	15892274	15893105	+	426	NA	promoter-TSS (ENSMUST00000040695.4)	protein_coding-promoter-TSS (ENSMUST00000040695.4)	33	ENSMUST00000040695.4	ENSMUSG00000032719	ENSMUST00000040695			Sbspon			protein_coding
Sox9_E16_Sample1_peak_429	chr1	15901957	15902715	+	58	NA	Intergenic	Intergenic	-9614	ENSMUST00000040695.4	ENSMUSG00000032719	ENSMUST00000040695			Sbspon			protein_coding
Sox9_E16_Sample1_peak_430	chr1	15936496	15936711	+	45	NA	Intergenic	Intergenic	-43881	ENSMUST00000040695.4	ENSMUSG00000032719	ENSMUST00000040695			Sbspon			protein_coding
Sox9_E16_Sample1_peak_431	chr1	16072545	16073493	+	51	NA	intron (ENSMUST00000145070.7, intron 4 of 5)	protein_coding-intron (ENSMUST00000115367.7, intron 2 of 3)	8193	ENSMUST00000115367.7	ENSMUSG00000067795	ENSMUST00000145070			4930444P10Rik			protein_coding
Sox9_E16_Sample1_peak_432	chr1	16092747	16093608	+	264	NA	exon (ENSMUST00000145070.7, exon 1 of 6)	protein_coding-exon (ENSMUST00000145070.7, exon 1 of 6)	148	ENSMUST00000145070.7	ENSMUSG00000067795	ENSMUST00000145070			4930444P10Rik			protein_coding
Sox9_E16_Sample1_peak_433	chr1	16104173	16106281	+	1321	NA	promoter-TSS (ENSMUST00000027053.7)	protein_coding-promoter-TSS (ENSMUST00000027053.7)	-547	ENSMUST00000027053.7	ENSMUSG00000025921	ENSMUST00000152626			Rdh10			protein_coding
Sox9_E16_Sample1_peak_435	chr1	16115839	16116324	+	50	NA	intron (ENSMUST00000027053.7, intron 2 of 5)	protein_coding-intron (ENSMUST00000027053.7, intron 2 of 5)	10307	ENSMUST00000027053.7	ENSMUSG00000025921	ENSMUST00000152626			Rdh10			protein_coding
Sox9_E16_Sample1_peak_436	chr1	16152681	16153627	+	318	NA	Intergenic	Intergenic	22652	ENSMUST00000152626.1	ENSMUSG00000025921	ENSMUST00000152626			Rdh10			protein_coding
Sox9_E16_Sample1_peak_437	chr1	16172182	16172671	+	39	NA	Intergenic	Intergenic	38091	ENSMUST00000192560.1	ENSMUSG00000104165	ENSMUST00000192560			Gm38249			TEC
Sox9_E16_Sample1_peak_439	chr1	16228084	16228730	+	247	NA	promoter-TSS (ENSMUST00000186343.1)	lncRNA-promoter-TSS (ENSMUST00000186343.1)	-99	ENSMUST00000186343.1	ENSMUSG00000100868	ENSMUST00000186343			Gm28095			lncRNA
Sox9_E16_Sample1_peak_440	chr1	16234790	16235672	+	237	NA	intron (ENSMUST00000162627.7, intron 12 of 13)	protein_coding-intron (ENSMUST00000027052.12, intron 11 of 12)	6725	ENSMUST00000186343.1	ENSMUSG00000100868	ENSMUST00000186343			Gm28095			lncRNA
Sox9_E16_Sample1_peak_441	chr1	16264489	16265855	+	145	NA	intron (ENSMUST00000160446.7, intron 3 of 3)	protein_coding-intron (ENSMUST00000027052.12, intron 11 of 12)	11543	ENSMUST00000159190.1	ENSMUSG00000089982	ENSMUST00000160446			Gm7568			lncRNA
Sox9_E16_Sample1_peak_442	chr1	16279180	16279943	+	51	NA	intron (ENSMUST00000162627.7, intron 12 of 13)	protein_coding-intron (ENSMUST00000027052.12, intron 11 of 12)	25932	ENSMUST00000159190.1	ENSMUSG00000089982	ENSMUST00000160446			Gm7568			lncRNA
Sox9_E16_Sample1_peak_443	chr1	16297588	16298117	+	91	NA	intron (ENSMUST00000162627.7, intron 12 of 13)	protein_coding-intron (ENSMUST00000027052.12, intron 11 of 12)	44223	ENSMUST00000159190.1	ENSMUSG00000089982	ENSMUST00000160446			Gm7568			lncRNA
Sox9_E16_Sample1_peak_444	chr1	16408167	16408862	+	99	NA	intron (ENSMUST00000151888.7, intron 3 of 3)	protein_coding-intron (ENSMUST00000027052.12, intron 4 of 12)	-33119	ENSMUST00000115360.7	ENSMUSG00000025920	ENSMUST00000162627			Stau2			protein_coding
Sox9_E16_Sample1_peak_445	chr1	16518579	16520287	+	648	NA	promoter-TSS (ENSMUST00000027052.12)	protein_coding-promoter-TSS (ENSMUST00000027052.12)	-126	ENSMUST00000149320.8	ENSMUSG00000025920	ENSMUST00000162627			Stau2			protein_coding
Sox9_E16_Sample1_peak_446	chr1	16618298	16619758	+	1392	NA	exon (ENSMUST00000195710.1, exon 1 of 1)	TEC-exon (ENSMUST00000195710.1, exon 1 of 1)	231	ENSMUST00000133639.1	ENSMUSG00000025939	ENSMUST00000182554			Ube2w			protein_coding
Sox9_E16_Sample1_peak_447	chr1	16656359	16657635	+	1867	NA	promoter-TSS (ENSMUST00000115352.9)	protein_coding-promoter-TSS (ENSMUST00000115352.9)	21	ENSMUST00000186948.6	ENSMUSG00000079658	ENSMUST00000186701			Eloc			protein_coding
Sox9_E16_Sample1_peak_448	chr1	16664927	16665986	+	1315	NA	exon (ENSMUST00000065373.5, exon 1 of 3)	protein_coding-exon (ENSMUST00000065373.5, exon 1 of 3)	220	ENSMUST00000176451.1	ENSMUSG00000025940	ENSMUST00000176451			Tmem70			protein_coding
Sox9_E16_Sample1_peak_449	chr1	16688005	16689070	+	604	NA	promoter-TSS (ENSMUST00000190366.1)	protein_coding-promoter-TSS (ENSMUST00000190366.1)	29	ENSMUST00000190366.1	ENSMUSG00000025779	ENSMUST00000190366			Ly96			protein_coding
Sox9_E16_Sample1_peak_450	chr1	16745897	16746449	+	64	NA	Intergenic	Intergenic	12450	ENSMUST00000185649.1	ENSMUSG00000100093	ENSMUST00000185649			Gm29649			processed_pseudogene
Sox9_E16_Sample1_peak_451	chr1	16798065	16798488	+	127	NA	Intergenic	Intergenic	-28138	ENSMUST00000071842.9	ENSMUSG00000091020	ENSMUST00000071842			Gm5828			processed_pseudogene
Sox9_E16_Sample1_peak_452	chr1	16824126	16824965	+	287	NA	Intergenic	Intergenic	-54407	ENSMUST00000071842.9	ENSMUSG00000091020	ENSMUST00000071842			Gm5828			processed_pseudogene
Sox9_E16_Sample1_peak_453	chr1	17096811	17098728	+	1573	NA	exon (ENSMUST00000038382.4, exon 1 of 5)	protein_coding-exon (ENSMUST00000038382.4, exon 1 of 5)	120	ENSMUST00000038382.4	ENSMUSG00000042686	ENSMUST00000038382			Jph1			protein_coding
Sox9_E16_Sample1_peak_454	chr1	17122941	17124013	+	246	NA	Intergenic	Intergenic	-1270	ENSMUST00000188872.1	ENSMUSG00000100110	ENSMUST00000188872			Gm28783			lncRNA
Sox9_E16_Sample1_peak_455	chr1	17145373	17145845	+	155	NA	intron (ENSMUST00000150457.1, intron 1 of 2)	protein_coding-intron (ENSMUST00000026879.7, intron 1 of 5)	141	ENSMUST00000189736.1	ENSMUSG00000025777	ENSMUST00000150457			Gdap1			protein_coding
Sox9_E16_Sample1_peak_457	chr1	17506591	17507335	+	130	NA	Intergenic	Intergenic	-13038	ENSMUST00000158909.1	ENSMUSG00000089534	ENSMUST00000158909			Gm25166			snoRNA
Sox9_E16_Sample1_peak_458	chr1	17726918	17727860	+	210	NA	promoter-TSS (ENSMUST00000149914.1)	lncRNA-promoter-TSS (ENSMUST00000149914.1)	-105	ENSMUST00000155588.7	ENSMUSG00000085125	ENSMUST00000155588			Gm16070			lncRNA
Sox9_E16_Sample1_peak_460	chr1	18057793	18058796	+	146	NA	promoter-TSS (ENSMUST00000188360.1)	transcribed_unprocessed_pseudogene-promoter-TSS (ENSMUST00000188360.1)	-25	ENSMUST00000188360.1	ENSMUSG00000101717	ENSMUST00000188360			Gm45784			transcribed_unprocessed_pseudogene
Sox9_E16_Sample1_peak_461	chr1	18106316	18106914	+	71	NA	Intergenic	Intergenic	30436	ENSMUST00000115340.7	ENSMUSG00000025774	ENSMUST00000026876			Crisp4			protein_coding
Sox9_E16_Sample1_peak_462	chr1	19178968	19179814	+	138	NA	Intergenic	Intergenic	-25425	ENSMUST00000162030.1	ENSMUSG00000100720	ENSMUST00000162030			Gm10075			processed_pseudogene
Sox9_E16_Sample1_peak_463	chr1	19205790	19206420	+	125	NA	Intergenic	Intergenic	-2809	ENSMUST00000027059.10	ENSMUSG00000025927	ENSMUST00000064976			Tfap2b			protein_coding
Sox9_E16_Sample1_peak_464	chr1	19209962	19211233	+	85	NA	intron (ENSMUST00000187754.6, intron 1 of 7)	protein_coding-intron (ENSMUST00000027059.10, intron 1 of 6)	-1457	ENSMUST00000064976.5	ENSMUSG00000025927	ENSMUST00000064976			Tfap2b			protein_coding
Sox9_E16_Sample1_peak_465	chr1	19241546	19242156	+	170	NA	promoter-TSS (ENSMUST00000189218.1)	lncRNA-promoter-TSS (ENSMUST00000189218.1)	-874	ENSMUST00000189218.1	ENSMUSG00000100538	ENSMUST00000189218			Gm28340			lncRNA
Sox9_E16_Sample1_peak_466	chr1	19321267	19322457	+	565	NA	Intergenic	Intergenic	-1165	ENSMUST00000190883.1	ENSMUSG00000101117	ENSMUST00000190883			Gm28341			processed_pseudogene
Sox9_E16_Sample1_peak_468	chr1	19473327	19474187	+	199	NA	Intergenic	Intergenic	40162	ENSMUST00000122719.1	ENSMUSG00000084668	ENSMUST00000122719			Gm24633			snoRNA
Sox9_E16_Sample1_peak_469	chr1	19849646	19850493	+	249	NA	Intergenic	Intergenic	215479	ENSMUST00000194347.1	ENSMUSG00000104095	ENSMUST00000194347			Gm37315			TEC
Sox9_E16_Sample1_peak_471	chr1	20311122	20311909	+	114	NA	intron (ENSMUST00000088448.11, intron 49 of 66)	protein_coding-intron (ENSMUST00000088448.11, intron 49 of 66)	-44937	ENSMUST00000161509.2	ENSMUSG00000089914	ENSMUST00000161509			4930486I03Rik			lncRNA
Sox9_E16_Sample1_peak_473	chr1	20477515	20478432	+	246	NA	intron (ENSMUST00000088448.11, intron 35 of 66)	protein_coding-intron (ENSMUST00000088448.11, intron 35 of 66)	-33061	ENSMUST00000093665.1	ENSMUSG00000070175	ENSMUST00000093665			Gm24162			snRNA
Sox9_E16_Sample1_peak_474	chr1	20554369	20554853	+	92	NA	intron (ENSMUST00000088448.11, intron 22 of 66)	protein_coding-intron (ENSMUST00000088448.11, intron 22 of 66)	63429	ENSMUST00000128051.1	ENSMUSG00000043760	ENSMUST00000132647			Pkhd1			protein_coding
Sox9_E16_Sample1_peak_475	chr1	20617470	20618410	+	271	NA	promoter-TSS (ENSMUST00000128051.1)	protein_coding-promoter-TSS (ENSMUST00000128051.1)	100	ENSMUST00000128051.1	ENSMUSG00000043760	ENSMUST00000132647			Pkhd1			protein_coding
Sox9_E16_Sample1_peak_476	chr1	20653681	20655240	+	176	NA	Intergenic	Intergenic	-15422	ENSMUST00000227082.1	ENSMUSG00000099906	ENSMUST00000185494			Gm28653			lncRNA
Sox9_E16_Sample1_peak_477	chr1	20819650	20820697	+	758	NA	promoter-TSS (ENSMUST00000185296.1)	protein_coding-promoter-TSS (ENSMUST00000185296.1)	87	ENSMUST00000185296.1	ENSMUSG00000041859	ENSMUST00000053266			Mcm3			protein_coding
Sox9_E16_Sample1_peak_478	chr1	20863411	20864383	+	217	NA	Intergenic	Intergenic	-21231	ENSMUST00000158233.1	ENSMUSG00000088858	ENSMUST00000158233			Gm24723			snoRNA
Sox9_E16_Sample1_peak_479	chr1	20879080	20879837	+	165	NA	Intergenic	Intergenic	11015	ENSMUST00000181654.1	ENSMUSG00000097934	ENSMUST00000181654			6720483E21Rik			lncRNA
Sox9_E16_Sample1_peak_480	chr1	20890133	20891544	+	1368	NA	promoter-TSS (ENSMUST00000181654.1)	lncRNA-promoter-TSS (ENSMUST00000181654.1)	232	ENSMUST00000189400.6	ENSMUSG00000025931	ENSMUST00000189400			Paqr8			protein_coding
Sox9_E16_Sample1_peak_482	chr1	20939264	20940784	+	280	NA	TTS (ENSMUST00000068880.13)	protein_coding-TTS (ENSMUST00000068880.13)	-5687	ENSMUST00000185639.1	ENSMUSG00000100929	ENSMUST00000185639			Gm28064			processed_pseudogene
Sox9_E16_Sample1_peak_483	chr1	20951096	20952068	+	737	NA	promoter-TSS (ENSMUST00000038447.5)	protein_coding-promoter-TSS (ENSMUST00000038447.5)	-44	ENSMUST00000160782.1	ENSMUSG00000041809	ENSMUST00000160782			Efhc1			protein_coding
Sox9_E16_Sample1_peak_484	chr1	20996892	20997309	+	76	NA	exon (ENSMUST00000037998.5, exon 11 of 11)	protein_coding-exon (ENSMUST00000037998.5, exon 11 of 11)	45412	ENSMUST00000038447.5	ENSMUSG00000041809	ENSMUST00000160782			Efhc1			protein_coding
Sox9_E16_Sample1_peak_485	chr1	21002438	21003306	+	659	NA	intron (ENSMUST00000037998.5, intron 10 of 10)	protein_coding-intron (ENSMUST00000037998.5, intron 10 of 10)	40784	ENSMUST00000187210.1	ENSMUSG00000041779	ENSMUST00000037998			Tram2			protein_coding
Sox9_E16_Sample1_peak_486	chr1	21009731	21010647	+	126	NA	intron (ENSMUST00000037998.5, intron 4 of 10)	protein_coding-intron (ENSMUST00000037998.5, intron 4 of 10)	33467	ENSMUST00000187210.1	ENSMUSG00000041779	ENSMUST00000037998			Tram2			protein_coding
Sox9_E16_Sample1_peak_487	chr1	21036894	21037831	+	43	NA	intron (ENSMUST00000037998.5, intron 2 of 10)	protein_coding-intron (ENSMUST00000037998.5, intron 2 of 10)	6294	ENSMUST00000187210.1	ENSMUSG00000041779	ENSMUST00000037998			Tram2			protein_coding
Sox9_E16_Sample1_peak_488	chr1	21043335	21043828	+	45	NA	promoter-TSS (ENSMUST00000187210.1)	protein_coding-promoter-TSS (ENSMUST00000187210.1)	75	ENSMUST00000187210.1	ENSMUSG00000041779	ENSMUST00000037998			Tram2			protein_coding
Sox9_E16_Sample1_peak_489	chr1	21050974	21053264	+	60	NA	intron (ENSMUST00000037998.5, intron 1 of 10)	protein_coding-intron (ENSMUST00000037998.5, intron 1 of 10)	-8463	ENSMUST00000187210.1	ENSMUSG00000041779	ENSMUST00000037998			Tram2			protein_coding
Sox9_E16_Sample1_peak_490	chr1	21075949	21076345	+	85	NA	intron (ENSMUST00000037998.5, intron 1 of 10)	protein_coding-intron (ENSMUST00000037998.5, intron 1 of 10)	3082	ENSMUST00000037998.5	ENSMUSG00000041779	ENSMUST00000037998			Tram2			protein_coding
Sox9_E16_Sample1_peak_491	chr1	21078618	21079805	+	1102	NA	promoter-TSS (ENSMUST00000037998.5)	protein_coding-promoter-TSS (ENSMUST00000037998.5)	18	ENSMUST00000037998.5	ENSMUSG00000041779	ENSMUST00000037998			Tram2			protein_coding
Sox9_E16_Sample1_peak_492	chr1	21089469	21090343	+	161	NA	Intergenic	Intergenic	9792	ENSMUST00000186612.1	ENSMUSG00000099971	ENSMUST00000186612			Gm28287			lncRNA
Sox9_E16_Sample1_peak_494	chr1	21166052	21167178	+	740	NA	Intergenic	Intergenic	-12373	ENSMUST00000189119.1	ENSMUSG00000100819	ENSMUST00000189119			Gm2693			unprocessed_pseudogene
Sox9_E16_Sample1_peak_495	chr1	21218516	21219468	+	840	NA	intron (ENSMUST00000027065.11, intron 1 of 4)	protein_coding-intron (ENSMUST00000027064.7, intron 1 of 4)	330	ENSMUST00000027064.7	ENSMUSG00000025933	ENSMUST00000027064			Tmem14a			protein_coding
Sox9_E16_Sample1_peak_496	chr1	21231551	21232312	+	73	NA	Intergenic	Intergenic	-2791	ENSMUST00000191648.1	ENSMUSG00000102633	ENSMUST00000191648			Gm38224			TEC
Sox9_E16_Sample1_peak_497	chr1	21240454	21240656	+	28	NA	promoter-TSS (ENSMUST00000027067.14)	protein_coding-promoter-TSS (ENSMUST00000027067.14)	-34	ENSMUST00000027067.14	ENSMUSG00000025934	ENSMUST00000121676			Gsta3			protein_coding
Sox9_E16_Sample1_peak_498	chr1	21252587	21253485	+	224	NA	promoter-TSS (ENSMUST00000190711.1)	protein_coding-promoter-TSS (ENSMUST00000190711.1)	-485	ENSMUST00000190711.1	ENSMUSG00000025934	ENSMUST00000121676			Gsta3			protein_coding
Sox9_E16_Sample1_peak_499	chr1	21271242	21272389	+	543	NA	promoter-TSS (ENSMUST00000178379.2)	unprocessed_pseudogene-promoter-TSS (ENSMUST00000178379.2)	-222	ENSMUST00000185842.1	ENSMUSG00000099343	ENSMUST00000185842			Gm28836			lncRNA
Sox9_E16_Sample1_peak_500	chr1	21287944	21288516	+	138	NA	exon (ENSMUST00000082032.12, exon 5 of 6)	transcribed_unprocessed_pseudogene-exon (ENSMUST00000082032.12, exon 5 of 6)	9897	ENSMUST00000178869.7	ENSMUSG00000025936	ENSMUST00000178869			Gm4956			transcribed_unprocessed_pseudogene
Sox9_E16_Sample1_peak_501	chr1	21344476	21345021	+	147	NA	Intergenic	Intergenic	-4893	ENSMUST00000088407.3	ENSMUSG00000067750	ENSMUST00000088407			Khdc1a			protein_coding
Sox9_E16_Sample1_peak_502	chr1	21411174	21411807	+	122	NA	intron (ENSMUST00000173058.7, intron 9 of 11)	protein_coding-intron (ENSMUST00000029667.12, intron 11 of 13)	20584	ENSMUST00000126985.2	ENSMUSG00000085679	ENSMUST00000126985			Gm16328			processed_pseudogene
Sox9_E16_Sample1_peak_504	chr1	21506317	21507117	+	72	NA	intron (ENSMUST00000174183.7, intron 2 of 11)	protein_coding-intron (ENSMUST00000029667.12, intron 3 of 13)	6339	ENSMUST00000119064.1	ENSMUSG00000082935	ENSMUST00000119064			Gm7658			processed_pseudogene
Sox9_E16_Sample1_peak_505	chr1	21690375	21691203	+	116	NA	intron (ENSMUST00000115299.7, intron 1 of 8)	protein_coding-intron (ENSMUST00000029667.12, intron 1 of 13)	149725	ENSMUST00000194737.1	ENSMUSG00000103748	ENSMUST00000194737			Gm38243			TEC
Sox9_E16_Sample1_peak_506	chr1	21829679	21830530	+	323	NA	intron (ENSMUST00000115299.7, intron 1 of 8)	protein_coding-intron (ENSMUST00000029667.12, intron 1 of 13)	10410	ENSMUST00000194737.1	ENSMUSG00000103748	ENSMUST00000194737			Gm38243			TEC
Sox9_E16_Sample1_peak_507	chr1	21855688	21856243	+	71	NA	promoter-TSS (ENSMUST00000134505.1)	protein_coding-promoter-TSS (ENSMUST00000134505.1)	-63	ENSMUST00000134505.1	ENSMUSG00000028033	ENSMUST00000174183			Kcnq5			protein_coding
Sox9_E16_Sample1_peak_508	chr1	21890375	21891171	+	246	NA	intron (ENSMUST00000115299.7, intron 1 of 8)	protein_coding-intron (ENSMUST00000029667.12, intron 1 of 13)	-34871	ENSMUST00000134505.1	ENSMUSG00000028033	ENSMUST00000174183			Kcnq5			protein_coding
Sox9_E16_Sample1_peak_509	chr1	21960393	21962293	+	773	NA	exon (ENSMUST00000029667.12, exon 1 of 14)	protein_coding-exon (ENSMUST00000029667.12, exon 1 of 14)	238	ENSMUST00000173058.7	ENSMUSG00000028033	ENSMUST00000174183			Kcnq5			protein_coding
Sox9_E16_Sample1_peak_510	chr1	22090975	22091802	+	217	NA	Intergenic	Intergenic	-60773	ENSMUST00000189850.1	ENSMUSG00000099692	ENSMUST00000189850			Gm5696			processed_pseudogene
Sox9_E16_Sample1_peak_511	chr1	22117362	22117727	+	59	NA	Intergenic	Intergenic	-86929	ENSMUST00000189850.1	ENSMUSG00000099692	ENSMUST00000189850			Gm5696			processed_pseudogene
Sox9_E16_Sample1_peak_511-2	chr1	22118405	22118868	+	59	NA	Intergenic	Intergenic	-88021	ENSMUST00000189850.1	ENSMUSG00000099692	ENSMUST00000189850			Gm5696			processed_pseudogene
Sox9_E16_Sample1_peak_512	chr1	22206379	22207450	+	195	NA	Intergenic	Intergenic	-30935	ENSMUST00000190225.1	ENSMUSG00000100418	ENSMUST00000190225			Gm28239			processed_pseudogene
Sox9_E16_Sample1_peak_513	chr1	22268650	22269137	+	39	NA	Intergenic	Intergenic	31044	ENSMUST00000190225.1	ENSMUSG00000100418	ENSMUST00000190225			Gm28239			processed_pseudogene
Sox9_E16_Sample1_peak_514	chr1	22315412	22316164	+	92	NA	promoter-TSS (ENSMUST00000164877.7)	protein_coding-promoter-TSS (ENSMUST00000164877.7)	17	ENSMUST00000164877.7	ENSMUSG00000041670	ENSMUST00000081544			Rims1			protein_coding
Sox9_E16_Sample1_peak_515	chr1	22533219	22533939	+	422	NA	TTS (ENSMUST00000218140.1)	protein_coding-TTS (ENSMUST00000218140.1)	-21050	ENSMUST00000239255.1	ENSMUSG00000041670	ENSMUST00000081544			Rims1			protein_coding
Sox9_E16_Sample1_peak_516	chr1	22805504	22806558	+	290	NA	promoter-TSS (ENSMUST00000081544.12)	protein_coding-promoter-TSS (ENSMUST00000081544.12)	-37	ENSMUST00000218140.1	ENSMUSG00000041670	ENSMUST00000081544			Rims1			protein_coding
Sox9_E16_Sample1_peak_517	chr1	23058529	23059120	+	39	NA	intron (ENSMUST00000191045.1, intron 3 of 3)	lncRNA-intron (ENSMUST00000191045.1, intron 3 of 3)	43429	ENSMUST00000073179.5	ENSMUSG00000073730	ENSMUST00000073179			Ppp1r14bl			protein_coding
Sox9_E16_Sample1_peak_518	chr1	23061866	23062467	+	164	NA	intron (ENSMUST00000191045.1, intron 3 of 3)	lncRNA-intron (ENSMUST00000191045.1, intron 3 of 3)	40087	ENSMUST00000073179.5	ENSMUSG00000073730	ENSMUST00000073179			Ppp1r14bl			protein_coding
Sox9_E16_Sample1_peak_519	chr1	23084583	23085024	+	45	NA	intron (ENSMUST00000191045.1, intron 3 of 3)	lncRNA-intron (ENSMUST00000191045.1, intron 3 of 3)	17450	ENSMUST00000073179.5	ENSMUSG00000073730	ENSMUST00000073179			Ppp1r14bl			protein_coding
Sox9_E16_Sample1_peak_520	chr1	23114006	23114972	+	89	NA	intron (ENSMUST00000191045.1, intron 3 of 3)	lncRNA-intron (ENSMUST00000191045.1, intron 3 of 3)	-12236	ENSMUST00000073179.5	ENSMUSG00000073730	ENSMUST00000073179			Ppp1r14bl			protein_coding
Sox9_E16_Sample1_peak_521	chr1	23117366	23117919	+	86	NA	intron (ENSMUST00000191045.1, intron 3 of 3)	lncRNA-intron (ENSMUST00000191045.1, intron 3 of 3)	-15389	ENSMUST00000073179.5	ENSMUSG00000073730	ENSMUST00000073179			Ppp1r14bl			protein_coding
Sox9_E16_Sample1_peak_523	chr1	23177198	23177482	+	18	NA	intron (ENSMUST00000191045.1, intron 2 of 3)	lncRNA-intron (ENSMUST00000191045.1, intron 2 of 3)	58333	ENSMUST00000191045.1	ENSMUSG00000101227	ENSMUST00000191045			Gm29506			lncRNA
Sox9_E16_Sample1_peak_524	chr1	23189794	23191001	+	773	NA	intron (ENSMUST00000191045.1, intron 2 of 3)	lncRNA-intron (ENSMUST00000191045.1, intron 2 of 3)	45276	ENSMUST00000191045.1	ENSMUSG00000101227	ENSMUST00000191045			Gm29506			lncRNA
Sox9_E16_Sample1_peak_525	chr1	23200310	23201121	+	112	NA	intron (ENSMUST00000191045.1, intron 2 of 3)	lncRNA-intron (ENSMUST00000191045.1, intron 2 of 3)	34958	ENSMUST00000191045.1	ENSMUSG00000101227	ENSMUST00000191045			Gm29506			lncRNA
Sox9_E16_Sample1_peak_526	chr1	23202687	23203454	+	293	NA	intron (ENSMUST00000191045.1, intron 2 of 3)	lncRNA-intron (ENSMUST00000191045.1, intron 2 of 3)	32603	ENSMUST00000191045.1	ENSMUSG00000101227	ENSMUST00000191045			Gm29506			lncRNA
Sox9_E16_Sample1_peak_527	chr1	23228265	23229029	+	99	NA	intron (ENSMUST00000191045.1, intron 1 of 3)	lncRNA-intron (ENSMUST00000191045.1, intron 1 of 3)	7026	ENSMUST00000191045.1	ENSMUSG00000101227	ENSMUST00000191045			Gm29506			lncRNA
Sox9_E16_Sample1_peak_528	chr1	23255830	23257311	+	1601	NA	promoter-TSS (ENSMUST00000193885.1)	TEC-promoter-TSS (ENSMUST00000193885.1)	-163	ENSMUST00000193885.1	ENSMUSG00000102766	ENSMUST00000193885			Gm6420			TEC
Sox9_E16_Sample1_peak_529	chr1	23264055	23264636	+	49	NA	Intergenic	Intergenic	-7924	ENSMUST00000083471.3	ENSMUSG00000065405	ENSMUST00000083471			Mir30a			miRNA
Sox9_E16_Sample1_peak_530	chr1	23265581	23266021	+	52	NA	Intergenic	Intergenic	-6468	ENSMUST00000083471.3	ENSMUSG00000065405	ENSMUST00000083471			Mir30a			miRNA
Sox9_E16_Sample1_peak_531	chr1	23270637	23272000	+	1104	NA	promoter-TSS (ENSMUST00000083471.3)	miRNA-promoter-TSS (ENSMUST00000083471.3)	-951	ENSMUST00000083471.3	ENSMUSG00000065405	ENSMUST00000083471			Mir30a			miRNA
Sox9_E16_Sample1_peak_532	chr1	23286433	23287232	+	71	NA	Intergenic	Intergenic	-4705	ENSMUST00000182303.1	ENSMUSG00000097970	ENSMUST00000182303			Gm27028			lncRNA
Sox9_E16_Sample1_peak_533	chr1	23321352	23321767	+	23	NA	Intergenic	Intergenic	25040	ENSMUST00000189078.1	ENSMUSG00000101226	ENSMUST00000189078			Gm20954			processed_pseudogene
Sox9_E16_Sample1_peak_535	chr1	23382581	23383807	+	1320	NA	promoter-TSS (ENSMUST00000027343.5)	protein_coding-promoter-TSS (ENSMUST00000027343.5)	-19	ENSMUST00000027343.5	ENSMUSG00000026158	ENSMUST00000189537			Ogfrl1			protein_coding
Sox9_E16_Sample1_peak_536	chr1	23396169	23396883	+	107	NA	intron (ENSMUST00000189537.1, intron 1 of 1)	protein_coding-intron (ENSMUST00000188677.1, intron 1 of 7)	1015	ENSMUST00000188677.1	ENSMUSG00000026158	ENSMUST00000189537			Ogfrl1			protein_coding
Sox9_E16_Sample1_peak_537	chr1	23480539	23481256	+	130	NA	TTS (ENSMUST00000180769.1)	processed_pseudogene-TTS (ENSMUST00000180769.1)	1358	ENSMUST00000180769.1	ENSMUSG00000097920	ENSMUST00000180769			Gm7784			processed_pseudogene
Sox9_E16_Sample1_peak_538	chr1	23607022	23607780	+	175	NA	Intergenic	Intergenic	32814	ENSMUST00000191140.1	ENSMUSG00000099503	ENSMUST00000191140			Gm28822			lncRNA
Sox9_E16_Sample1_peak_539	chr1	23705523	23705926	+	28	NA	Intergenic	Intergenic	-56029	ENSMUST00000144602.1	ENSMUSG00000026156	ENSMUST00000063663			B3gat2			protein_coding
Sox9_E16_Sample1_peak_540	chr1	23747843	23748565	+	99	NA	Intergenic	Intergenic	-13549	ENSMUST00000144602.1	ENSMUSG00000026156	ENSMUST00000063663			B3gat2			protein_coding
Sox9_E16_Sample1_peak_541	chr1	23761841	23764002	+	710	NA	exon (ENSMUST00000063663.5, exon 1 of 4)	protein_coding-exon (ENSMUST00000063663.5, exon 1 of 4)	910	ENSMUST00000140583.1	ENSMUSG00000026156	ENSMUST00000063663			B3gat2			protein_coding
Sox9_E16_Sample1_peak_542	chr1	23827026	23827553	+	257	NA	intron (ENSMUST00000063663.5, intron 2 of 3)	protein_coding-intron (ENSMUST00000063663.5, intron 2 of 3)	20488	ENSMUST00000136506.1	ENSMUSG00000026155	ENSMUST00000149737			Smap1			protein_coding
Sox9_E16_Sample1_peak_544	chr1	23921648	23922660	+	1050	NA	exon (ENSMUST00000027339.13, exon 1 of 10)	protein_coding-exon (ENSMUST00000027339.13, exon 1 of 10)	163	ENSMUST00000027339.13	ENSMUSG00000026155	ENSMUST00000149737			Smap1			protein_coding
Sox9_E16_Sample1_peak_545	chr1	23959027	23959620	+	99	NA	Intergenic	Intergenic	-37006	ENSMUST00000027339.13	ENSMUSG00000026155	ENSMUST00000149737			Smap1			protein_coding
Sox9_E16_Sample1_peak_546	chr1	24004861	24005918	+	920	NA	promoter-TSS (ENSMUST00000192339.1)	TEC-promoter-TSS (ENSMUST00000192339.1)	-116	ENSMUST00000192339.1	ENSMUSG00000102495	ENSMUST00000192339			Gm26524			TEC
Sox9_E16_Sample1_peak_547	chr1	24033497	24034484	+	375	NA	intron (ENSMUST00000187752.6, intron 11 of 20)	protein_coding-intron (ENSMUST00000027337.14, intron 11 of 20)	-4904	ENSMUST00000186331.1	ENSMUSG00000026153	ENSMUST00000185525			Fam135a			protein_coding
Sox9_E16_Sample1_peak_548	chr1	24099439	24100780	+	1199	NA	promoter-TSS (ENSMUST00000187369.6)	protein_coding-promoter-TSS (ENSMUST00000187369.6)	73	ENSMUST00000187369.6	ENSMUSG00000026153	ENSMUST00000185525			Fam135a			protein_coding
Sox9_E16_Sample1_peak_549	chr1	24107454	24108476	+	545	NA	Intergenic	Intergenic	7340	ENSMUST00000192408.1	ENSMUSG00000102398	ENSMUST00000192408			Gm37580			TEC
Sox9_E16_Sample1_peak_550	chr1	24137122	24137581	+	58	NA	Intergenic	Intergenic	12076	ENSMUST00000180661.1	ENSMUSG00000097670	ENSMUST00000180661			Gm26607			processed_pseudogene
Sox9_E16_Sample1_peak_551	chr1	24171402	24171876	+	45	NA	Intergenic	Intergenic	-5971	ENSMUST00000054588.14	ENSMUSG00000026147	ENSMUST00000088349			Col9a1			protein_coding
Sox9_E16_Sample1_peak_552	chr1	24186861	24187458	+	283	NA	intron (ENSMUST00000054588.14, intron 5 of 37)	protein_coding-intron (ENSMUST00000054588.14, intron 5 of 37)	-8028	ENSMUST00000088349.2	ENSMUSG00000026147	ENSMUST00000088349			Col9a1			protein_coding
Sox9_E16_Sample1_peak_553	chr1	24195158	24196520	+	336	NA	intron (ENSMUST00000054588.14, intron 7 of 37)	protein_coding-intron (ENSMUST00000054588.14, intron 7 of 37)	652	ENSMUST00000088349.2	ENSMUSG00000026147	ENSMUST00000088349			Col9a1			protein_coding
Sox9_E16_Sample1_peak_554	chr1	24218604	24219444	+	51	NA	intron (ENSMUST00000054588.14, intron 20 of 37)	protein_coding-intron (ENSMUST00000054588.14, intron 20 of 37)	-10493	ENSMUST00000147902.1	ENSMUSG00000026147	ENSMUST00000088349			Col9a1			protein_coding
Sox9_E16_Sample1_peak_555	chr1	24230161	24231055	+	250	NA	intron (ENSMUST00000088349.2, intron 23 of 31)	protein_coding-intron (ENSMUST00000054588.14, intron 29 of 37)	1091	ENSMUST00000147902.1	ENSMUSG00000026147	ENSMUST00000088349			Col9a1			protein_coding
Sox9_E16_Sample1_peak_556	chr1	24248887	24249294	+	45	NA	intron (ENSMUST00000088349.2, intron 31 of 31)	protein_coding-intron (ENSMUST00000054588.14, intron 37 of 37)	19573	ENSMUST00000147902.1	ENSMUSG00000026147	ENSMUST00000088349			Col9a1			protein_coding
Sox9_E16_Sample1_peak_557	chr1	24302424	24303331	+	132	NA	intron (ENSMUST00000115244.8, intron 37 of 50)	protein_coding-intron (ENSMUST00000051344.5, intron 37 of 47)	73360	ENSMUST00000147902.1	ENSMUSG00000026147	ENSMUST00000088349			Col9a1			protein_coding
Sox9_E16_Sample1_peak_558	chr1	24378190	24378922	+	293	NA	intron (ENSMUST00000051344.5, intron 15 of 47)	protein_coding-intron (ENSMUST00000051344.5, intron 15 of 47)	74189	ENSMUST00000144297.1	ENSMUSG00000026141	ENSMUST00000144297			Col19a1			protein_coding
Sox9_E16_Sample1_peak_559	chr1	24586286	24587570	+	292	NA	intron (ENSMUST00000115244.8, intron 1 of 50)	protein_coding-intron (ENSMUST00000051344.5, intron 1 of 47)	483	ENSMUST00000051344.5	ENSMUSG00000026141	ENSMUST00000144297			Col19a1			protein_coding
Sox9_E16_Sample1_peak_560	chr1	24611734	24616007	+	79621	NA	promoter-TSS (ENSMUST00000188299.1)	unprocessed_pseudogene-promoter-TSS (ENSMUST00000188299.1)	101	ENSMUST00000190277.1	ENSMUSG00000101111	ENSMUST00000190277			Gm28437			unprocessed_pseudogene
Sox9_E16_Sample1_peak_561	chr1	24633500	24633923	+	64	NA	Intergenic	Intergenic	-17514	ENSMUST00000187117.1	ENSMUSG00000101249	ENSMUST00000187117			Gm29216			unprocessed_pseudogene
Sox9_E16_Sample1_peak_562	chr1	24677878	24679444	+	1448	NA	promoter-TSS (ENSMUST00000095062.9)	protein_coding-promoter-TSS (ENSMUST00000095062.9)	1	ENSMUST00000186096.6	ENSMUSG00000073725	ENSMUST00000191471			Lmbrd1			protein_coding
Sox9_E16_Sample1_peak_563	chr1	24699255	24700072	+	107	NA	intron (ENSMUST00000186096.6, intron 3 of 5)	protein_coding-intron (ENSMUST00000095062.9, intron 3 of 15)	20737	ENSMUST00000095062.9	ENSMUSG00000073725	ENSMUST00000191471			Lmbrd1			protein_coding
Sox9_E16_Sample1_peak_564	chr1	24732112	24732349	+	23	NA	TTS (ENSMUST00000186190.1)	protein_coding-TTS (ENSMUST00000186190.1)	3588	ENSMUST00000187468.1	ENSMUSG00000073725	ENSMUST00000191471			Lmbrd1			protein_coding
Sox9_E16_Sample1_peak_567	chr1	24991348	24992613	+	164	NA	Intergenic	Intergenic	-19961	ENSMUST00000188406.1	ENSMUSG00000100450	ENSMUST00000188406			Gm9443			processed_pseudogene
Sox9_E16_Sample1_peak_571	chr1	25057370	25058323	+	522	NA	Intergenic	Intergenic	-30614	ENSMUST00000185379.1	ENSMUSG00000099392	ENSMUST00000185379			Gm29414			lncRNA
Sox9_E16_Sample1_peak_572	chr1	25063780	25064477	+	258	NA	Intergenic	Intergenic	-36896	ENSMUST00000185379.1	ENSMUSG00000099392	ENSMUST00000185379			Gm29414			lncRNA
Sox9_E16_Sample1_peak_574	chr1	25107752	25108435	+	28	NA	intron (ENSMUST00000135518.7, intron 26 of 31)	protein_coding-intron (ENSMUST00000041838.6, intron 24 of 29)	-80861	ENSMUST00000185379.1	ENSMUSG00000099392	ENSMUST00000185379			Gm29414			lncRNA
Sox9_E16_Sample1_peak_576	chr1	25228351	25229236	+	189	NA	promoter-TSS (ENSMUST00000126626.7)	protein_coding-promoter-TSS (ENSMUST00000126626.7)	33	ENSMUST00000126626.7	ENSMUSG00000033569	ENSMUST00000153568			Adgrb3			protein_coding
Sox9_E16_Sample1_peak_577	chr1	25510272	25511071	+	107	NA	intron (ENSMUST00000041838.6, intron 6 of 29)	protein_coding-intron (ENSMUST00000041838.6, intron 6 of 29)	59600	ENSMUST00000122791.1	ENSMUSG00000084740	ENSMUST00000122791			Gm25294			snRNA
Sox9_E16_Sample1_peak_578	chr1	25542740	25543234	+	40	NA	intron (ENSMUST00000151309.7, intron 5 of 30)	protein_coding-intron (ENSMUST00000041838.6, intron 4 of 29)	68197	ENSMUST00000195543.1	ENSMUSG00000103889	ENSMUST00000195543			Gm37011			TEC
Sox9_E16_Sample1_peak_579	chr1	25576885	25577324	+	28	NA	intron (ENSMUST00000146592.7, intron 1 of 28)	protein_coding-intron (ENSMUST00000146592.7, intron 1 of 28)	34080	ENSMUST00000195543.1	ENSMUSG00000103889	ENSMUST00000195543			Gm37011			TEC
Sox9_E16_Sample1_peak_580	chr1	25829886	25830920	+	185	NA	promoter-TSS (ENSMUST00000135518.7)	protein_coding-promoter-TSS (ENSMUST00000135518.7)	-254	ENSMUST00000194343.1	ENSMUSG00000104516	ENSMUST00000194343			Gm9884			TEC
Sox9_E16_Sample1_peak_581	chr1	26687079	26688264	+	65	NA	promoter-TSS (ENSMUST00000097801.3)	protein_coding-promoter-TSS (ENSMUST00000097801.3)	-211	ENSMUST00000097801.3	ENSMUSG00000073722	ENSMUST00000097801			4931408C20Rik			protein_coding
Sox9_E16_Sample1_peak_582	chr1	26760096	26760815	+	85	NA	Intergenic	Intergenic	-72995	ENSMUST00000097801.3	ENSMUSG00000073722	ENSMUST00000097801			4931408C20Rik			protein_coding
Sox9_E16_Sample1_peak_585	chr1	30718203	30719455	+	473	NA	exon (ENSMUST00000065469.2, exon 2 of 2)	lncRNA-exon (ENSMUST00000065469.2, exon 2 of 2)	1133	ENSMUST00000065469.2	ENSMUSG00000053185	ENSMUST00000065469			Gm9898			lncRNA
Sox9_E16_Sample1_peak_587	chr1	30847276	30847938	+	41	NA	intron (ENSMUST00000191064.6, intron 2 of 6)	protein_coding-intron (ENSMUST00000088310.9, intron 1 of 14)	-11176	ENSMUST00000195437.1	ENSMUSG00000103783	ENSMUST00000195437			Gm37522			TEC
Sox9_E16_Sample1_peak_588	chr1	30865948	30866409	+	122	NA	exon (ENSMUST00000192050.1, exon 1 of 1)	TEC-exon (ENSMUST00000192050.1, exon 1 of 1)	2360	ENSMUST00000192050.1	ENSMUSG00000104315	ENSMUST00000192050			Gm37906			TEC
Sox9_E16_Sample1_peak_589	chr1	30872892	30874221	+	1665	NA	promoter-TSS (ENSMUST00000185604.1)	protein_coding-promoter-TSS (ENSMUST00000185604.1)	25	ENSMUST00000186733.6	ENSMUSG00000048874	ENSMUST00000186105			Phf3			protein_coding
Sox9_E16_Sample1_peak_590	chr1	30908855	30909290	+	79	NA	Intergenic	Intergenic	-35151	ENSMUST00000191245.6	ENSMUSG00000048874	ENSMUST00000186105			Phf3			protein_coding
Sox9_E16_Sample1_peak_590-2	chr1	30910094	30910714	+	79	NA	Intergenic	Intergenic	33900	ENSMUST00000130934.1	ENSMUSG00000026064	ENSMUST00000232841			Ptp4a1			protein_coding
Sox9_E16_Sample1_peak_592	chr1	30948754	30950417	+	1684	NA	promoter-TSS (ENSMUST00000232841.1)	protein_coding-promoter-TSS (ENSMUST00000232841.1)	106	ENSMUST00000238874.1	ENSMUSG00000117310	ENSMUST00000076587			Ptp4a1			protein_coding
Sox9_E16_Sample1_peak_594	chr1	31033693	31034783	+	149	NA	intron (ENSMUST00000187892.7, intron 4 of 5)	protein_coding-intron (ENSMUST00000187892.7, intron 4 of 5)	-7681	ENSMUST00000191364.1	ENSMUSG00000100237	ENSMUST00000191364			Gm28644			lncRNA
Sox9_E16_Sample1_peak_595	chr1	31050362	31051903	+	355	NA	intron (ENSMUST00000233331.1, intron 2 of 4)	protein_coding-intron (ENSMUST00000187892.7, intron 4 of 5)	9213	ENSMUST00000191364.1	ENSMUSG00000100237	ENSMUST00000191364			Gm28644			lncRNA
Sox9_E16_Sample1_peak_596	chr1	31094146	31096391	+	158	NA	intron (ENSMUST00000187892.7, intron 3 of 5)	protein_coding-intron (ENSMUST00000187892.7, intron 3 of 5)	1186	ENSMUST00000188605.1	ENSMUSG00000086727	ENSMUST00000135245			4931428L18Rik			protein_coding
Sox9_E16_Sample1_peak_597	chr1	31102490	31103571	+	429	NA	intron (ENSMUST00000187892.7, intron 3 of 5)	protein_coding-intron (ENSMUST00000187892.7, intron 3 of 5)	-6576	ENSMUST00000188605.1	ENSMUSG00000086727	ENSMUST00000135245			4931428L18Rik			protein_coding
Sox9_E16_Sample1_peak_599	chr1	31142421	31142583	+	18	NA	intron (ENSMUST00000127775.7, intron 2 of 2)	protein_coding-intron (ENSMUST00000127775.7, intron 2 of 2)	6476	ENSMUST00000186448.1	ENSMUSG00000100910	ENSMUST00000186448			Gm29128			lncRNA
Sox9_E16_Sample1_peak_600	chr1	31149575	31150789	+	446	NA	TTS (ENSMUST00000186448.1)	lncRNA-TTS (ENSMUST00000186448.1)	14156	ENSMUST00000186448.1	ENSMUSG00000100910	ENSMUST00000186448			Gm29128			lncRNA
Sox9_E16_Sample1_peak_602	chr1	31640782	31641315	+	99	NA	Intergenic	Intergenic	15690	ENSMUST00000157995.1	ENSMUSG00000088620	ENSMUST00000157995			Gm23032			snRNA
Sox9_E16_Sample1_peak_605	chr1	32172173	32173175	+	645	NA	promoter-TSS (ENSMUST00000027226.11)	protein_coding-promoter-TSS (ENSMUST00000027226.11)	-40	ENSMUST00000027226.11	ENSMUSG00000026058	ENSMUST00000186984			Khdrbs2			protein_coding
Sox9_E16_Sample1_peak_606	chr1	33488307	33489087	+	51	NA	intron (ENSMUST00000027312.10, intron 10 of 13)	protein_coding-intron (ENSMUST00000027312.10, intron 10 of 13)	6596	ENSMUST00000185489.1	ENSMUSG00000101682	ENSMUST00000185489			Gm29228			processed_pseudogene
Sox9_E16_Sample1_peak_607	chr1	33583698	33584779	+	325	NA	intron (ENSMUST00000027312.10, intron 7 of 13)	protein_coding-intron (ENSMUST00000027312.10, intron 7 of 13)	32594	ENSMUST00000192891.1	ENSMUSG00000102714	ENSMUST00000192891			Gm37618			TEC
Sox9_E16_Sample1_peak_608	chr1	33657616	33658408	+	130	NA	TTS (ENSMUST00000185377.1)	processed_pseudogene-TTS (ENSMUST00000185377.1)	231	ENSMUST00000185377.1	ENSMUSG00000102093	ENSMUST00000185377			Gm17813			processed_pseudogene
Sox9_E16_Sample1_peak_609	chr1	33669384	33670647	+	997	NA	promoter-TSS (ENSMUST00000027312.10)	protein_coding-promoter-TSS (ENSMUST00000027312.10)	172	ENSMUST00000191965.1	ENSMUSG00000103746	ENSMUST00000191779			1700001G17Rik			TEC
Sox9_E16_Sample1_peak_610	chr1	33719802	33720689	+	963	NA	promoter-TSS (ENSMUST00000115174.3)	protein_coding-promoter-TSS (ENSMUST00000115174.3)	107	ENSMUST00000151482.7	ENSMUSG00000004768	ENSMUST00000195006			Rab23			protein_coding
Sox9_E16_Sample1_peak_611	chr1	33734134	33734518	+	45	NA	promoter-TSS (ENSMUST00000150593.7)	protein_coding-promoter-TSS (ENSMUST00000150593.7)	-202	ENSMUST00000150593.7	ENSMUSG00000004768	ENSMUST00000195006			Rab23			protein_coding
Sox9_E16_Sample1_peak_612	chr1	33739119	33739573	+	118	NA	TTS (ENSMUST00000122822.1)	protein_coding-TTS (ENSMUST00000122822.1)	1209	ENSMUST00000132066.3	ENSMUSG00000004768	ENSMUST00000195006			Rab23			protein_coding
Sox9_E16_Sample1_peak_613	chr1	33756543	33758254	+	586	NA	exon (ENSMUST00000189741.1, exon 1 of 1)	protein_coding-exon (ENSMUST00000189741.1, exon 1 of 1)	329	ENSMUST00000189741.1	ENSMUSG00000042215	ENSMUST00000044691			Bag2			protein_coding
Sox9_E16_Sample1_peak_614	chr1	33766889	33767709	+	181	NA	intron (ENSMUST00000139143.7, intron 11 of 12)	protein_coding-intron (ENSMUST00000019861.12, intron 13 of 14)	-9504	ENSMUST00000044691.8	ENSMUSG00000042215	ENSMUST00000044691			Bag2			protein_coding
Sox9_E16_Sample1_peak_615	chr1	33813759	33814826	+	1048	NA	promoter-TSS (ENSMUST00000130376.2)	protein_coding-promoter-TSS (ENSMUST00000130376.2)	-81	ENSMUST00000130376.2	ENSMUSG00000042197	ENSMUST00000019861			Zfp451			protein_coding
Sox9_E16_Sample1_peak_616	chr1	33906989	33908481	+	120	NA	promoter-TSS (ENSMUST00000062289.10)	protein_coding-promoter-TSS (ENSMUST00000062289.10)	33	ENSMUST00000115161.7	ENSMUSG00000042182	ENSMUST00000062289			Bend6			protein_coding
Sox9_E16_Sample1_peak_617	chr1	33944894	33945544	+	181	NA	intron (ENSMUST00000183034.4, intron 2 of 102)	protein_coding-intron (ENSMUST00000183034.4, intron 2 of 102)	18466	ENSMUST00000190740.1	ENSMUSG00000099382	ENSMUST00000190740			Gm28631			processed_pseudogene
Sox9_E16_Sample1_peak_619	chr1	33963099	33963644	+	78	NA	TTS (ENSMUST00000190740.1)	processed_pseudogene-TTS (ENSMUST00000190740.1)	314	ENSMUST00000190740.1	ENSMUSG00000099382	ENSMUST00000190740			Gm28631			processed_pseudogene
Sox9_E16_Sample1_peak_620	chr1	33966572	33967620	+	52	NA	intron (ENSMUST00000183034.4, intron 2 of 102)	protein_coding-intron (ENSMUST00000183034.4, intron 2 of 102)	-3411	ENSMUST00000190740.1	ENSMUSG00000099382	ENSMUST00000190740			Gm28631			processed_pseudogene
Sox9_E16_Sample1_peak_621	chr1	34005370	34006486	+	189	NA	promoter-TSS (ENSMUST00000182314.7)	protein_coding-promoter-TSS (ENSMUST00000182314.7)	46	ENSMUST00000182697.7	ENSMUSG00000026131	ENSMUST00000182410			Dst			protein_coding
Sox9_E16_Sample1_peak_622	chr1	34011081	34012129	+	459	NA	promoter-TSS (ENSMUST00000097785.9)	protein_coding-promoter-TSS (ENSMUST00000097785.9)	-208	ENSMUST00000097786.9	ENSMUSG00000026131	ENSMUST00000182410			Dst			protein_coding
Sox9_E16_Sample1_peak_624	chr1	34060507	34061548	+	147	NA	intron (ENSMUST00000097785.9, intron 1 of 97)	protein_coding-intron (ENSMUST00000097785.9, intron 1 of 97)	-16200	ENSMUST00000239001.1	ENSMUSG00000026131	ENSMUST00000182410			Dst			protein_coding
Sox9_E16_Sample1_peak_625	chr1	34076886	34078005	+	135	NA	intron (ENSMUST00000239001.1, intron 1 of 5)	protein_coding-intron (ENSMUST00000097785.9, intron 1 of 97)	218	ENSMUST00000239001.1	ENSMUSG00000026131	ENSMUST00000182410			Dst			protein_coding
Sox9_E16_Sample1_peak_626	chr1	34104654	34105445	+	45	NA	intron (ENSMUST00000182410.2, intron 1 of 3)	protein_coding-intron (ENSMUST00000182410.2, intron 1 of 3)	-12310	ENSMUST00000198033.1	ENSMUSG00000105982	ENSMUST00000198033			Mir6896			miRNA
Sox9_E16_Sample1_peak_627	chr1	34120799	34121877	+	311	NA	promoter-TSS (ENSMUST00000183006.4)	protein_coding-promoter-TSS (ENSMUST00000183006.4)	88	ENSMUST00000183006.4	ENSMUSG00000026131	ENSMUST00000182410			Dst			protein_coding
Sox9_E16_Sample1_peak_628	chr1	34139763	34140820	+	235	NA	intron (ENSMUST00000115104.9, intron 6 of 97)	protein_coding-intron (ENSMUST00000097785.9, intron 6 of 97)	19041	ENSMUST00000183006.4	ENSMUSG00000026131	ENSMUST00000182410			Dst			protein_coding
Sox9_E16_Sample1_peak_629	chr1	34218570	34219056	+	155	NA	intron (ENSMUST00000185269.6, intron 38 of 83)	protein_coding-intron (ENSMUST00000097785.9, intron 53 of 97)	-17783	ENSMUST00000194192.2	ENSMUSG00000026131	ENSMUST00000182410			Dst			protein_coding
Sox9_E16_Sample1_peak_630	chr1	34236326	34237721	+	190	NA	exon (ENSMUST00000194192.2, exon 1 of 23)	protein_coding-exon (ENSMUST00000194192.2, exon 1 of 23)	427	ENSMUST00000194192.2	ENSMUSG00000026131	ENSMUST00000182410			Dst			protein_coding
Sox9_E16_Sample1_peak_631	chr1	34299698	34300805	+	163	NA	intron (ENSMUST00000182018.7, intron 28 of 31)	protein_coding-intron (ENSMUST00000097785.9, intron 94 of 97)	5805	ENSMUST00000182507.3	ENSMUSG00000026131	ENSMUST00000182410			Dst			protein_coding
Sox9_E16_Sample1_peak_633	chr1	34432873	34433516	+	158	NA	promoter-TSS (ENSMUST00000175111.1)	miRNA-promoter-TSS (ENSMUST00000175111.1)	5	ENSMUST00000175111.1	ENSMUSG00000092852	ENSMUST00000175111			Mir5103			miRNA
Sox9_E16_Sample1_peak_634	chr1	34434097	34435127	+	82	NA	Intergenic	Intergenic	-1348	ENSMUST00000192173.1	ENSMUSG00000102336	ENSMUST00000192173			Gm37233			lncRNA
Sox9_E16_Sample1_peak_635	chr1	34439124	34440182	+	1225	NA	promoter-TSS (ENSMUST00000027303.13)	protein_coding-promoter-TSS (ENSMUST00000027303.13)	19	ENSMUST00000042493.9	ENSMUSG00000042111	ENSMUST00000042493			Ccdc115			protein_coding
Sox9_E16_Sample1_peak_636	chr1	34459237	34460367	+	800	NA	promoter-TSS (ENSMUST00000027302.13)	protein_coding-promoter-TSS (ENSMUST00000027302.13)	10	ENSMUST00000188884.2	ENSMUSG00000026126	ENSMUST00000188972			Ptpn18			protein_coding
Sox9_E16_Sample1_peak_637	chr1	34472127	34473459	+	319	NA	promoter-TSS (ENSMUST00000188972.2)	protein_coding-promoter-TSS (ENSMUST00000188972.2)	73	ENSMUST00000188972.2	ENSMUSG00000026126	ENSMUST00000188972			Ptpn18			protein_coding
Sox9_E16_Sample1_peak_639	chr1	34536506	34537663	+	213	NA	intron (ENSMUST00000027298.4, intron 3 of 5)	protein_coding-intron (ENSMUST00000027298.4, intron 3 of 5)	1436	ENSMUST00000027298.4	ENSMUSG00000026124	ENSMUST00000027298			Cfc1			protein_coding
Sox9_E16_Sample1_peak_640	chr1	34579305	34579981	+	130	NA	promoter-TSS (ENSMUST00000052670.10)	protein_coding-promoter-TSS (ENSMUST00000052670.10)	-14	ENSMUST00000052670.10	ENSMUSG00000045174	ENSMUST00000052670			Amer3			protein_coding
Sox9_E16_Sample1_peak_641	chr1	34601905	34602525	+	45	NA	Intergenic	Intergenic	5504	ENSMUST00000186179.1	ENSMUSG00000100524	ENSMUST00000186179			Gm28418			processed_pseudogene
Sox9_E16_Sample1_peak_642	chr1	34677742	34678914	+	416	NA	intron (ENSMUST00000159747.8, intron 1 of 13)	protein_coding-intron (ENSMUST00000159747.8, intron 1 of 13)	140	ENSMUST00000159747.8	ENSMUSG00000037509	ENSMUST00000160855			Arhgef4			protein_coding
Sox9_E16_Sample1_peak_645	chr1	34750064	34751395	+	175	NA	exon (ENSMUST00000159021.8, exon 1 of 6)	protein_coding-exon (ENSMUST00000159021.8, exon 1 of 6)	148	ENSMUST00000159021.8	ENSMUSG00000037509	ENSMUST00000160855			Arhgef4			protein_coding
Sox9_E16_Sample1_peak_646	chr1	34793294	34794163	+	226	NA	intron (ENSMUST00000159021.8, intron 2 of 5)	protein_coding-intron (ENSMUST00000159021.8, intron 2 of 5)	-7976	ENSMUST00000047664.15	ENSMUSG00000037509	ENSMUST00000160855			Arhgef4			protein_coding
Sox9_E16_Sample1_peak_647	chr1	34801470	34802548	+	584	NA	TTS (ENSMUST00000211073.1)	protein_coding-TTS (ENSMUST00000211073.1)	215	ENSMUST00000211073.1	ENSMUSG00000118272	ENSMUST00000211073			Arhgef4			protein_coding
Sox9_E16_Sample1_peak_648	chr1	34815444	34816298	+	124	NA	exon (ENSMUST00000047534.11, exon 7 of 7)	protein_coding-exon (ENSMUST00000047534.11, exon 7 of 7)	-3963	ENSMUST00000193040.2	ENSMUSG00000104002	ENSMUST00000193040			Gm38336			lncRNA
Sox9_E16_Sample1_peak_649	chr1	34819295	34819713	+	76	NA	TTS (ENSMUST00000185231.1)	protein_coding-TTS (ENSMUST00000185231.1)	-4021	ENSMUST00000192924.1	ENSMUSG00000104358	ENSMUST00000192924			Gm37127			TEC
Sox9_E16_Sample1_peak_650	chr1	34842402	34843564	+	713	NA	promoter-TSS (ENSMUST00000047534.11)	protein_coding-promoter-TSS (ENSMUST00000047534.11)	2	ENSMUST00000185469.6	ENSMUSG00000037503	ENSMUST00000185279			Fam168b			protein_coding
Sox9_E16_Sample1_peak_651	chr1	34849708	34850747	+	377	NA	intron (ENSMUST00000027297.10, intron 1 of 7)	protein_coding-intron (ENSMUST00000027297.10, intron 1 of 7)	235	ENSMUST00000027297.10	ENSMUSG00000026123	ENSMUST00000027297			Plekhb2			protein_coding
Sox9_E16_Sample1_peak_652	chr1	34863938	34865110	+	240	NA	intron (ENSMUST00000156687.7, intron 5 of 6)	protein_coding-intron (ENSMUST00000027297.10, intron 5 of 7)	12687	ENSMUST00000152654.2	ENSMUSG00000026123	ENSMUST00000027297			Plekhb2			protein_coding
Sox9_E16_Sample1_peak_653	chr1	34891524	34892015	+	51	NA	Intergenic	Intergenic	14113	ENSMUST00000191722.1	ENSMUSG00000026123	ENSMUST00000027297			Plekhb2			protein_coding
Sox9_E16_Sample1_peak_654	chr1	35094656	35095557	+	122	NA	Intergenic	Intergenic	83978	ENSMUST00000104043.1	ENSMUSG00000077231	ENSMUST00000104043			Gm25096			snoRNA
Sox9_E16_Sample1_peak_655	chr1	35368386	35368944	+	85	NA	Intergenic	Intergenic	-189581	ENSMUST00000104043.1	ENSMUSG00000077231	ENSMUST00000104043			Gm25096			snoRNA
Sox9_E16_Sample1_peak_657	chr1	35770131	35770970	+	71	NA	Intergenic	Intergenic	8948	ENSMUST00000082667.1	ENSMUSG00000064601	ENSMUST00000082667			Gm25634			snRNA
Sox9_E16_Sample1_peak_658	chr1	35813808	35814943	+	180	NA	Intergenic	Intergenic	7401	ENSMUST00000187528.1	ENSMUSG00000101714	ENSMUST00000187528			Gm28415			lncRNA
Sox9_E16_Sample1_peak_659	chr1	35825333	35825862	+	71	NA	Intergenic	Intergenic	18623	ENSMUST00000187528.1	ENSMUSG00000101714	ENSMUST00000187528			Gm28415			lncRNA
Sox9_E16_Sample1_peak_661	chr1	35869656	35870016	+	99	NA	Intergenic	Intergenic	-10009	ENSMUST00000194261.1	ENSMUSG00000102531	ENSMUST00000194261			1110002O04Rik			lncRNA
Sox9_E16_Sample1_peak_662	chr1	36013769	36014160	+	81	NA	Intergenic	Intergenic	2892	ENSMUST00000192017.1	ENSMUSG00000104201	ENSMUST00000192017			4930535G08Rik			lncRNA
Sox9_E16_Sample1_peak_663	chr1	36016964	36017606	+	138	NA	Intergenic	Intergenic	6213	ENSMUST00000192017.1	ENSMUSG00000104201	ENSMUST00000192017			4930535G08Rik			lncRNA
Sox9_E16_Sample1_peak_664	chr1	36059826	36060830	+	402	NA	Intergenic	Intergenic	-8072	ENSMUST00000088174.3	ENSMUSG00000045216	ENSMUST00000088174			Hs6st1			protein_coding
Sox9_E16_Sample1_peak_666	chr1	36068022	36070272	+	187	NA	exon (ENSMUST00000088174.3, exon 1 of 2)	protein_coding-exon (ENSMUST00000088174.3, exon 1 of 2)	747	ENSMUST00000088174.3	ENSMUSG00000045216	ENSMUST00000088174			Hs6st1			protein_coding
Sox9_E16_Sample1_peak_667	chr1	36087960	36088695	+	58	NA	intron (ENSMUST00000088174.3, intron 1 of 1)	protein_coding-intron (ENSMUST00000088174.3, intron 1 of 1)	-13363	ENSMUST00000194670.1	ENSMUSG00000045216	ENSMUST00000088174			Hs6st1			protein_coding
Sox9_E16_Sample1_peak_668	chr1	36243796	36244626	+	439	NA	promoter-TSS (ENSMUST00000046875.13)	protein_coding-promoter-TSS (ENSMUST00000046875.13)	-50	ENSMUST00000174266.7	ENSMUSG00000037470	ENSMUST00000192159			Uggt1			protein_coding
Sox9_E16_Sample1_peak_669	chr1	36272477	36273205	+	41	NA	intron (ENSMUST00000056946.7, intron 1 of 3)	protein_coding-intron (ENSMUST00000056946.7, intron 1 of 3)	594	ENSMUST00000056946.7	ENSMUSG00000047180	ENSMUST00000056946			Neurl3			protein_coding
Sox9_E16_Sample1_peak_671	chr1	36307567	36308531	+	568	NA	exon (ENSMUST00000192874.1, exon 1 of 1)	protein_coding-exon (ENSMUST00000192874.1, exon 1 of 1)	270	ENSMUST00000140218.1	ENSMUSG00000037447	ENSMUST00000147123			Arid5a			protein_coding
Sox9_E16_Sample1_peak_672	chr1	36323982	36324509	+	39	NA	TTS (ENSMUST00000137906.1)	protein_coding-TTS (ENSMUST00000137906.1)	7218	ENSMUST00000141121.1	ENSMUSG00000037447	ENSMUST00000147123			Arid5a			protein_coding
Sox9_E16_Sample1_peak_673	chr1	36368499	36369273	+	424	NA	promoter-TSS (ENSMUST00000186470.1)	protein_coding-promoter-TSS (ENSMUST00000186470.1)	216	ENSMUST00000188957.1	ENSMUSG00000010453	ENSMUST00000185912			Kansl3			protein_coding
Sox9_E16_Sample1_peak_674	chr1	36444606	36445651	+	474	NA	exon (ENSMUST00000001171.12, exon 1 of 7)	protein_coding-exon (ENSMUST00000001171.12, exon 1 of 7)	129	ENSMUST00000193502.1	ENSMUSG00000001143	ENSMUST00000193502			Lman2l			protein_coding
Sox9_E16_Sample1_peak_675	chr1	36471263	36472138	+	515	NA	promoter-TSS (ENSMUST00000153128.1)	protein_coding-promoter-TSS (ENSMUST00000153128.1)	80	ENSMUST00000153128.1	ENSMUSG00000037408	ENSMUST00000153128			Cnnm4			protein_coding
Sox9_E16_Sample1_peak_676	chr1	36480178	36480674	+	45	NA	intron (ENSMUST00000153128.1, intron 1 of 6)	protein_coding-intron (ENSMUST00000153128.1, intron 1 of 6)	6474	ENSMUST00000193157.1	ENSMUSG00000104316	ENSMUST00000193157			Gm37909			TEC
Sox9_E16_Sample1_peak_677	chr1	36511481	36512876	+	422	NA	promoter-TSS (ENSMUST00000154225.1)	protein_coding-promoter-TSS (ENSMUST00000154225.1)	311	ENSMUST00000097776.3	ENSMUSG00000001138	ENSMUST00000097776			Cnnm3			protein_coding
Sox9_E16_Sample1_peak_678	chr1	36534121	36534741	+	30	NA	exon (ENSMUST00000054665.9, exon 2 of 9)	protein_coding-exon (ENSMUST00000054665.9, exon 2 of 9)	1308	ENSMUST00000054665.9	ENSMUSG00000067653	ENSMUST00000193083			Ankrd23			protein_coding
Sox9_E16_Sample1_peak_679	chr1	36546735	36547845	+	411	NA	promoter-TSS (ENSMUST00000194894.3)	protein_coding-promoter-TSS (ENSMUST00000194894.3)	-59	ENSMUST00000194894.3	ENSMUSG00000079610	ENSMUST00000207843			Ankrd39			protein_coding
Sox9_E16_Sample1_peak_680	chr1	36556547	36558998	+	338	NA	promoter-TSS (ENSMUST00000149224.2)	lncRNA-promoter-TSS (ENSMUST00000149224.2)	71	ENSMUST00000194426.1	ENSMUSG00000087589	ENSMUST00000149224			D430040D24Rik			lncRNA
Sox9_E16_Sample1_peak_681	chr1	36573619	36574418	+	72	NA	intron (ENSMUST00000193548.5, intron 3 of 5)	protein_coding-intron (ENSMUST00000170295.7, intron 12 of 14)	13669	ENSMUST00000193155.5	ENSMUSG00000046337	ENSMUST00000193548			Fam178b			protein_coding
Sox9_E16_Sample1_peak_682	chr1	36580090	36581054	+	303	NA	intron (ENSMUST00000170295.7, intron 11 of 14)	protein_coding-intron (ENSMUST00000170295.7, intron 11 of 14)	7115	ENSMUST00000193155.5	ENSMUSG00000046337	ENSMUST00000193548			Fam178b			protein_coding
Sox9_E16_Sample1_peak_683	chr1	36592834	36593436	+	104	NA	intron (ENSMUST00000194839.5, intron 2 of 5)	protein_coding-intron (ENSMUST00000195729.1, intron 2 of 4)	197	ENSMUST00000193763.5	ENSMUSG00000046337	ENSMUST00000193548			Fam178b			protein_coding
Sox9_E16_Sample1_peak_685	chr1	36691206	36691989	+	155	NA	promoter-TSS (ENSMUST00000191790.5)	protein_coding-promoter-TSS (ENSMUST00000191790.5)	-13	ENSMUST00000195151.5	ENSMUSG00000061518	ENSMUST00000195151			Cox5b			protein_coding
Sox9_E16_Sample1_peak_686	chr1	36709204	36710165	+	673	NA	promoter-TSS (ENSMUST00000159448.7)	protein_coding-promoter-TSS (ENSMUST00000159448.7)	-6	ENSMUST00000159448.7	ENSMUSG00000037351	ENSMUST00000159448			Actr1b			protein_coding
Sox9_E16_Sample1_peak_687	chr1	36744327	36744735	+	28	NA	exon (ENSMUST00000193459.2, exon 2 of 4)	protein_coding-exon (ENSMUST00000193459.2, exon 2 of 4)	176	ENSMUST00000193459.2	ENSMUSG00000102416	ENSMUST00000193459			4933424G06Rik			protein_coding
Sox9_E16_Sample1_peak_689	chr1	36784858	36785517	+	217	NA	Intergenic	Intergenic	6203	ENSMUST00000190128.1	ENSMUSG00000026117	ENSMUST00000027291			Zap70			protein_coding
Sox9_E16_Sample1_peak_690	chr1	36889085	36889482	+	59	NA	exon (ENSMUST00000027290.11, exon 2 of 41)	protein_coding-exon (ENSMUST00000027290.11, exon 2 of 41)	-17238	ENSMUST00000192008.1	ENSMUSG00000103016	ENSMUST00000192008			Gm37506			TEC
Sox9_E16_Sample1_peak_693	chr1	36920145	36920764	+	78	NA	intron (ENSMUST00000185964.2, intron 1 of 5)	protein_coding-intron (ENSMUST00000027290.11, intron 1 of 40)	-3915	ENSMUST00000194317.1	ENSMUSG00000102930	ENSMUST00000194317			Gm38115			lncRNA
Sox9_E16_Sample1_peak_695	chr1	36938986	36940208	+	653	NA	promoter-TSS (ENSMUST00000027290.11)	protein_coding-promoter-TSS (ENSMUST00000027290.11)	-70	ENSMUST00000027290.11	ENSMUSG00000026116	ENSMUST00000189470			Tmem131			protein_coding
Sox9_E16_Sample1_peak_696	chr1	37029001	37029575	+	45	NA	promoter-TSS (ENSMUST00000067178.13)	protein_coding-promoter-TSS (ENSMUST00000067178.13)	-16	ENSMUST00000124404.7	ENSMUSG00000050122	ENSMUST00000195450			Vwa3b			protein_coding
Sox9_E16_Sample1_peak_697	chr1	37057063	37057584	+	92	NA	intron (ENSMUST00000027289.13, intron 4 of 24)	protein_coding-intron (ENSMUST00000027289.13, intron 4 of 24)	21615	ENSMUST00000027289.13	ENSMUSG00000050122	ENSMUST00000195450			Vwa3b			protein_coding
Sox9_E16_Sample1_peak_698	chr1	37299720	37300589	+	517	NA	promoter-TSS (ENSMUST00000132401.7)	protein_coding-promoter-TSS (ENSMUST00000132401.7)	-154	ENSMUST00000136846.7	ENSMUSG00000026113	ENSMUST00000193024			Inpp4a			protein_coding
Sox9_E16_Sample1_peak_699	chr1	37317588	37318447	+	92	NA	intron (ENSMUST00000136846.7, intron 1 of 25)	protein_coding-intron (ENSMUST00000027287.10, intron 1 of 25)	13487	ENSMUST00000192652.1	ENSMUSG00000102879	ENSMUST00000192652			Gm37135			TEC
Sox9_E16_Sample1_peak_700	chr1	37336508	37337444	+	166	NA	intron (ENSMUST00000136846.7, intron 1 of 25)	protein_coding-intron (ENSMUST00000027287.10, intron 1 of 25)	-2804	ENSMUST00000141402.1	ENSMUSG00000086064	ENSMUST00000141402			4930439A04Rik			lncRNA
Sox9_E16_Sample1_peak_701	chr1	37350447	37351672	+	312	NA	intron (ENSMUST00000136846.7, intron 1 of 25)	protein_coding-intron (ENSMUST00000027287.10, intron 1 of 25)	-6338	ENSMUST00000193774.5	ENSMUSG00000026113	ENSMUST00000193024			Inpp4a			protein_coding
Sox9_E16_Sample1_peak_702	chr1	37429604	37430654	+	520	NA	promoter-TSS (ENSMUST00000027285.12)	protein_coding-promoter-TSS (ENSMUST00000027285.12)	-10	ENSMUST00000114925.9	ENSMUSG00000026111	ENSMUST00000134184			Unc50			protein_coding
Sox9_E16_Sample1_peak_703	chr1	37478115	37479037	+	107	NA	intron (ENSMUST00000154819.7, intron 4 of 14)	protein_coding-intron (ENSMUST00000042161.14, intron 4 of 14)	10029	ENSMUST00000192316.1	ENSMUSG00000103948	ENSMUST00000192316			4930594C11Rik			TEC
Sox9_E16_Sample1_peak_704	chr1	37540422	37541444	+	622	NA	promoter-TSS (ENSMUST00000151952.7)	protein_coding-promoter-TSS (ENSMUST00000151952.7)	83	ENSMUST00000151952.7	ENSMUSG00000026110	ENSMUST00000194660			Mgat4a			protein_coding
Sox9_E16_Sample1_peak_705	chr1	37583682	37584154	+	39	NA	Intergenic	Intergenic	-30341	ENSMUST00000160659.1	ENSMUSG00000089767	ENSMUST00000160659			4930556I23Rik			lncRNA
Sox9_E16_Sample1_peak_706	chr1	37614521	37617035	+	166	NA	TTS (ENSMUST00000160659.1)	lncRNA-TTS (ENSMUST00000160659.1)	1519	ENSMUST00000160659.1	ENSMUSG00000089767	ENSMUST00000160659			4930556I23Rik			lncRNA
Sox9_E16_Sample1_peak_707	chr1	37665478	37667252	+	356	NA	intron (ENSMUST00000162875.7, intron 1 of 9)	protein_coding-intron (ENSMUST00000160589.1, intron 2 of 3)	5643	ENSMUST00000192005.1	ENSMUSG00000104365	ENSMUST00000192005			4930470B04Rik			TEC
Sox9_E16_Sample1_peak_708	chr1	37686904	37688424	+	384	NA	intron (ENSMUST00000160589.1, intron 1 of 3)	protein_coding-intron (ENSMUST00000160589.1, intron 1 of 3)	9000	ENSMUST00000192480.1	ENSMUSG00000102650	ENSMUST00000192480			Gm19863			TEC
Sox9_E16_Sample1_peak_710	chr1	37696442	37697190	+	113	NA	promoter-TSS (ENSMUST00000192480.1)	TEC-promoter-TSS (ENSMUST00000192480.1)	-152	ENSMUST00000192480.1	ENSMUSG00000102650	ENSMUST00000192480			Gm19863			TEC
Sox9_E16_Sample1_peak_711	chr1	37718630	37720463	+	264	NA	intron (ENSMUST00000160589.1, intron 1 of 3)	protein_coding-intron (ENSMUST00000160589.1, intron 1 of 3)	249	ENSMUST00000160589.1	ENSMUSG00000026090	ENSMUST00000162875			2010300C02Rik			protein_coding
Sox9_E16_Sample1_peak_712	chr1	37864540	37865657	+	1307	NA	promoter-TSS (ENSMUST00000041815.14)	protein_coding-promoter-TSS (ENSMUST00000041815.14)	-19	ENSMUST00000041815.14	ENSMUSG00000060771	ENSMUST00000239367			Tsga10			protein_coding
Sox9_E16_Sample1_peak_713	chr1	37871714	37872827	+	474	NA	promoter-TSS (ENSMUST00000041621.4)	protein_coding-promoter-TSS (ENSMUST00000041621.4)	64	ENSMUST00000041621.4	ENSMUSG00000037216	ENSMUST00000041621			Lipt1			protein_coding
Sox9_E16_Sample1_peak_714	chr1	37889916	37891389	+	338	NA	promoter-TSS (ENSMUST00000027257.9)	protein_coding-promoter-TSS (ENSMUST00000027257.9)	109	ENSMUST00000160082.2	ENSMUSG00000026087	ENSMUST00000194857			Mrpl30			protein_coding
Sox9_E16_Sample1_peak_716	chr1	37956412	37957197	+	58	NA	intron (ENSMUST00000114894.1, intron 1 of 5)	protein_coding-intron (ENSMUST00000027254.9, intron 1 of 5)	955	ENSMUST00000027254.9	ENSMUSG00000026085	ENSMUST00000144184			Lyg1			protein_coding
Sox9_E16_Sample1_peak_717	chr1	37996883	37998602	+	719	NA	promoter-TSS (ENSMUST00000027252.7)	protein_coding-promoter-TSS (ENSMUST00000027252.7)	-126	ENSMUST00000195032.5	ENSMUSG00000058407	ENSMUST00000192960			Txndc9			protein_coding
Sox9_E16_Sample1_peak_718	chr1	38129120	38130287	+	835	NA	promoter-TSS (ENSMUST00000027251.11)	protein_coding-promoter-TSS (ENSMUST00000027251.11)	-41	ENSMUST00000027251.11	ENSMUSG00000026082	ENSMUST00000193472			Rev1			protein_coding
Sox9_E16_Sample1_peak_719	chr1	38307686	38308605	+	189	NA	intron (ENSMUST00000129696.1, intron 1 of 2)	protein_coding-intron (ENSMUST00000039827.13, intron 9 of 22)	243	ENSMUST00000129696.1	ENSMUSG00000085280	ENSMUST00000129696			Gm16151			lncRNA
Sox9_E16_Sample1_peak_720	chr1	38358093	38358833	+	138	NA	intron (ENSMUST00000095027.8, intron 5 of 21)	protein_coding-intron (ENSMUST00000027250.13, intron 6 of 7)	-26486	ENSMUST00000143261.7	ENSMUSG00000087131	ENSMUST00000143261			Gm16152			lncRNA
Sox9_E16_Sample1_peak_721	chr1	38393156	38393732	+	45	NA	intron (ENSMUST00000143261.7, intron 4 of 4)	protein_coding-intron (ENSMUST00000027250.13, intron 6 of 7)	4615	ENSMUST00000131663.1	ENSMUSG00000087131	ENSMUST00000143261			Gm16152			lncRNA
Sox9_E16_Sample1_peak_723	chr1	38450670	38451078	+	92	NA	intron (ENSMUST00000039827.13, intron 5 of 22)	protein_coding-intron (ENSMUST00000027250.13, intron 5 of 7)	-36645	ENSMUST00000195175.1	ENSMUSG00000102984	ENSMUST00000195175			Gm34727			processed_pseudogene
Sox9_E16_Sample1_peak_724	chr1	38626656	38628044	+	226	NA	promoter-TSS (ENSMUST00000095027.8)	protein_coding-promoter-TSS (ENSMUST00000095027.8)	-149	ENSMUST00000238906.1	ENSMUSG00000037138	ENSMUST00000238906			Aff3			protein_coding
Sox9_E16_Sample1_peak_725	chr1	38835581	38836652	+	240	NA	exon (ENSMUST00000147695.8, exon 1 of 12)	protein_coding-exon (ENSMUST00000147695.8, exon 1 of 12)	258	ENSMUST00000191724.1	ENSMUSG00000048814	ENSMUST00000147695			Lonrf2			protein_coding
Sox9_E16_Sample1_peak_726	chr1	38897515	38898215	+	226	NA	intron (ENSMUST00000193435.5, intron 1 of 4)	protein_coding-intron (ENSMUST00000027249.11, intron 1 of 6)	121	ENSMUST00000192175.1	ENSMUSG00000026080	ENSMUST00000192175			Chst10			protein_coding
Sox9_E16_Sample1_peak_727	chr1	38987192	38988418	+	866	NA	promoter-TSS (ENSMUST00000193489.1)	protein_coding-promoter-TSS (ENSMUST00000193489.1)	-36	ENSMUST00000193489.1	ENSMUSG00000026078	ENSMUST00000193073			Pdcl3			protein_coding
Sox9_E16_Sample1_peak_728	chr1	39029391	39030101	+	64	NA	Intergenic	Intergenic	27891	ENSMUST00000195476.1	ENSMUSG00000104188	ENSMUST00000195476			Gm37821			lncRNA
Sox9_E16_Sample1_peak_729	chr1	39186539	39187445	+	281	NA	promoter-TSS (ENSMUST00000184059.1)	miRNA-promoter-TSS (ENSMUST00000184059.1)	0	ENSMUST00000184059.1	ENSMUSG00000098833	ENSMUST00000184059			Mir6349			miRNA
Sox9_E16_Sample1_peak_730	chr1	39192484	39194535	+	230	NA	promoter-TSS (ENSMUST00000056815.8)	protein_coding-promoter-TSS (ENSMUST00000056815.8)	-222	ENSMUST00000173050.7	ENSMUSG00000026077	ENSMUST00000056815			Npas2			protein_coding
Sox9_E16_Sample1_peak_731	chr1	39237597	39238173	+	207	NA	intron (ENSMUST00000056815.8, intron 1 of 20)	protein_coding-intron (ENSMUST00000056815.8, intron 1 of 20)	38680	ENSMUST00000174365.1	ENSMUSG00000092553	ENSMUST00000174365			Gm20428			processed_pseudogene
Sox9_E16_Sample1_peak_732	chr1	39281008	39281908	+	147	NA	intron (ENSMUST00000056815.8, intron 2 of 20)	protein_coding-intron (ENSMUST00000056815.8, intron 2 of 20)	-4893	ENSMUST00000174365.1	ENSMUSG00000092553	ENSMUST00000174365			Gm20428			processed_pseudogene
Sox9_E16_Sample1_peak_734	chr1	39313523	39314356	+	117	NA	promoter-TSS (ENSMUST00000173076.1)	processed_pseudogene-promoter-TSS (ENSMUST00000173076.1)	-960	ENSMUST00000173076.1	ENSMUSG00000092563	ENSMUST00000173076			Gm3617			processed_pseudogene
Sox9_E16_Sample1_peak_735	chr1	39318007	39318404	+	83	NA	intron (ENSMUST00000056815.8, intron 7 of 20)	protein_coding-intron (ENSMUST00000056815.8, intron 7 of 20)	3306	ENSMUST00000173076.1	ENSMUSG00000092563	ENSMUST00000173076			Gm3617			processed_pseudogene
Sox9_E16_Sample1_peak_736	chr1	39335715	39336519	+	148	NA	intron (ENSMUST00000056815.8, intron 15 of 20)	protein_coding-intron (ENSMUST00000056815.8, intron 15 of 20)	-5438	ENSMUST00000172825.1	ENSMUSG00000026077	ENSMUST00000056815			Npas2			protein_coding
Sox9_E16_Sample1_peak_737	chr1	39367363	39368554	+	700	NA	promoter-TSS (ENSMUST00000178079.7)	protein_coding-promoter-TSS (ENSMUST00000178079.7)	29	ENSMUST00000178079.7	ENSMUSG00000073702	ENSMUST00000195123			Rpl31			protein_coding
Sox9_E16_Sample1_peak_738	chr1	39392432	39394290	+	205	NA	promoter-TSS (ENSMUST00000195854.1)	protein_coding-promoter-TSS (ENSMUST00000195854.1)	-730	ENSMUST00000195854.1	ENSMUSG00000003134	ENSMUST00000192531			Tbc1d8			protein_coding
Sox9_E16_Sample1_peak_740	chr1	39408920	39409348	+	23	NA	intron (ENSMUST00000054462.10, intron 2 of 19)	protein_coding-intron (ENSMUST00000054462.10, intron 2 of 19)	10798	ENSMUST00000191698.1	ENSMUSG00000102607	ENSMUST00000191698			Gm37265			TEC
Sox9_E16_Sample1_peak_741	chr1	39410223	39410673	+	147	NA	intron (ENSMUST00000054462.10, intron 2 of 19)	protein_coding-intron (ENSMUST00000054462.10, intron 2 of 19)	9484	ENSMUST00000191698.1	ENSMUSG00000102607	ENSMUST00000191698			Gm37265			TEC
Sox9_E16_Sample1_peak_742	chr1	39417574	39418403	+	122	NA	intron (ENSMUST00000054462.10, intron 2 of 19)	protein_coding-intron (ENSMUST00000054462.10, intron 2 of 19)	1944	ENSMUST00000191698.1	ENSMUSG00000102607	ENSMUST00000191698			Gm37265			TEC
Sox9_E16_Sample1_peak_743	chr1	39424946	39425950	+	92	NA	intron (ENSMUST00000054462.10, intron 2 of 19)	protein_coding-intron (ENSMUST00000054462.10, intron 2 of 19)	-5516	ENSMUST00000191698.1	ENSMUSG00000102607	ENSMUST00000191698			Gm37265			TEC
Sox9_E16_Sample1_peak_744	chr1	39445594	39446409	+	65	NA	intron (ENSMUST00000193823.1, intron 1 of 18)	protein_coding-intron (ENSMUST00000054462.10, intron 1 of 19)	-26069	ENSMUST00000191698.1	ENSMUSG00000102607	ENSMUST00000191698			Gm37265			TEC
Sox9_E16_Sample1_peak_746	chr1	39456376	39456891	+	173	NA	intron (ENSMUST00000193823.1, intron 1 of 18)	protein_coding-intron (ENSMUST00000054462.10, intron 1 of 19)	22028	ENSMUST00000192531.5	ENSMUSG00000003134	ENSMUST00000192531			Tbc1d8			protein_coding
Sox9_E16_Sample1_peak_747	chr1	39458073	39458690	+	142	NA	intron (ENSMUST00000193823.1, intron 1 of 18)	protein_coding-intron (ENSMUST00000054462.10, intron 1 of 19)	20280	ENSMUST00000192531.5	ENSMUSG00000003134	ENSMUST00000192531			Tbc1d8			protein_coding
Sox9_E16_Sample1_peak_748	chr1	39478097	39479118	+	949	NA	promoter-TSS (ENSMUST00000192531.5)	protein_coding-promoter-TSS (ENSMUST00000192531.5)	54	ENSMUST00000192531.5	ENSMUSG00000003134	ENSMUST00000192531			Tbc1d8			protein_coding
Sox9_E16_Sample1_peak_749	chr1	39535449	39536326	+	825	NA	promoter-TSS (ENSMUST00000003219.13)	protein_coding-promoter-TSS (ENSMUST00000003219.13)	85	ENSMUST00000003219.13	ENSMUSG00000003135	ENSMUST00000195567			Cnot11			protein_coding
Sox9_E16_Sample1_peak_750	chr1	39576411	39577587	+	907	NA	exon (ENSMUST00000062525.10, exon 1 of 7)	protein_coding-exon (ENSMUST00000062525.10, exon 1 of 7)	304	ENSMUST00000195705.1	ENSMUSG00000048234	ENSMUST00000153381			Rnf149			protein_coding
Sox9_E16_Sample1_peak_751	chr1	39650413	39651034	+	122	NA	exon (ENSMUST00000053355.5, exon 1 of 4)	protein_coding-exon (ENSMUST00000053355.5, exon 1 of 4)	547	ENSMUST00000181841.1	ENSMUSG00000097083	ENSMUST00000181841			D930019O06Rik			lncRNA
Sox9_E16_Sample1_peak_752	chr1	39670437	39670910	+	28	NA	intron (ENSMUST00000151913.2, intron 13 of 14)	protein_coding-intron (ENSMUST00000151913.2, intron 13 of 14)	-19199	ENSMUST00000053355.5	ENSMUSG00000050967	ENSMUST00000053355			Creg2			protein_coding
Sox9_E16_Sample1_peak_753	chr1	39702431	39702769	+	51	NA	intron (ENSMUST00000151913.2, intron 4 of 14)	protein_coding-intron (ENSMUST00000151913.2, intron 4 of 14)	-10729	ENSMUST00000126760.1	ENSMUSG00000057173	ENSMUST00000151913			Rfx8			protein_coding
Sox9_E16_Sample1_peak_754	chr1	39720742	39721168	+	39	NA	promoter-TSS (ENSMUST00000151913.2)	protein_coding-promoter-TSS (ENSMUST00000151913.2)	42	ENSMUST00000151913.2	ENSMUSG00000057173	ENSMUST00000151913			Rfx8			protein_coding
Sox9_E16_Sample1_peak_755	chr1	39761511	39762333	+	395	NA	Intergenic	Intergenic	-40925	ENSMUST00000151913.2	ENSMUSG00000057173	ENSMUST00000151913			Rfx8			protein_coding
Sox9_E16_Sample1_peak_756	chr1	39779360	39779866	+	217	NA	Intergenic	Intergenic	25719	ENSMUST00000171319.3	ENSMUSG00000091937	ENSMUST00000171319			Gm3646			protein_coding
Sox9_E16_Sample1_peak_757	chr1	39816423	39817168	+	107	NA	Intergenic	Intergenic	-11463	ENSMUST00000171319.3	ENSMUSG00000091937	ENSMUST00000171319			Gm3646			protein_coding
Sox9_E16_Sample1_peak_758	chr1	39900299	39901968	+	410	NA	promoter-TSS (ENSMUST00000191761.5)	protein_coding-promoter-TSS (ENSMUST00000191761.5)	-37	ENSMUST00000193661.1	ENSMUSG00000026074	ENSMUST00000194163			Map4k4			protein_coding
Sox9_E16_Sample1_peak_760	chr1	39936176	39936709	+	169	NA	intron (ENSMUST00000168431.6, intron 2 of 29)	protein_coding-intron (ENSMUST00000163854.8, intron 2 of 30)	-27713	ENSMUST00000193514.6	ENSMUSG00000026074	ENSMUST00000194163			Map4k4			protein_coding
Sox9_E16_Sample1_peak_761	chr1	39939279	39939774	+	116	NA	intron (ENSMUST00000168431.6, intron 2 of 29)	protein_coding-intron (ENSMUST00000163854.8, intron 2 of 30)	-24629	ENSMUST00000193514.6	ENSMUSG00000026074	ENSMUST00000194163			Map4k4			protein_coding
Sox9_E16_Sample1_peak_763	chr1	39948583	39948615	+	29	NA	intron (ENSMUST00000168431.6, intron 2 of 29)	protein_coding-intron (ENSMUST00000163854.8, intron 2 of 30)	-15556	ENSMUST00000193514.6	ENSMUSG00000026074	ENSMUST00000194163			Map4k4			protein_coding
Sox9_E16_Sample1_peak_765	chr1	39956590	39957038	+	78	NA	intron (ENSMUST00000168431.6, intron 2 of 29)	protein_coding-intron (ENSMUST00000163854.8, intron 2 of 30)	-7341	ENSMUST00000193514.6	ENSMUSG00000026074	ENSMUST00000194163			Map4k4			protein_coding
Sox9_E16_Sample1_peak_766	chr1	40085470	40086123	+	217	NA	promoter-TSS (ENSMUST00000181756.2)	lncRNA-promoter-TSS (ENSMUST00000181756.2)	55	ENSMUST00000181756.2	ENSMUSG00000097899	ENSMUST00000181756			Gm16894			lncRNA
Sox9_E16_Sample1_peak_767	chr1	40116387	40116849	+	39	NA	intron (ENSMUST00000027243.12, intron 5 of 8)	protein_coding-intron (ENSMUST00000027243.12, intron 5 of 8)	28107	ENSMUST00000193969.1	ENSMUSG00000102975	ENSMUST00000193969			Gm37347			TEC
Sox9_E16_Sample1_peak_768	chr1	40139589	40140571	+	462	NA	Intergenic	Intergenic	51569	ENSMUST00000193969.1	ENSMUSG00000102975	ENSMUST00000193969			Gm37347			TEC
Sox9_E16_Sample1_peak_770	chr1	40190483	40191332	+	130	NA	Intergenic	Intergenic	-34173	ENSMUST00000027241.10	ENSMUSG00000026072	ENSMUST00000027241			Il1r1			protein_coding
Sox9_E16_Sample1_peak_771	chr1	40222157	40222412	+	47	NA	Intergenic	Intergenic	-2796	ENSMUST00000027241.10	ENSMUSG00000026072	ENSMUST00000027241			Il1r1			protein_coding
Sox9_E16_Sample1_peak_772	chr1	40224615	40225667	+	206	NA	promoter-TSS (ENSMUST00000027241.10)	protein_coding-promoter-TSS (ENSMUST00000027241.10)	61	ENSMUST00000027241.10	ENSMUSG00000026072	ENSMUST00000027241			Il1r1			protein_coding
Sox9_E16_Sample1_peak_774	chr1	40255248	40255699	+	61	NA	intron (ENSMUST00000027241.10, intron 1 of 10)	protein_coding-intron (ENSMUST00000027241.10, intron 1 of 10)	-11113	ENSMUST00000114795.2	ENSMUSG00000026072	ENSMUST00000027241			Il1r1			protein_coding
Sox9_E16_Sample1_peak_775	chr1	40266336	40267480	+	488	NA	intron (ENSMUST00000114795.2, intron 1 of 10)	protein_coding-intron (ENSMUST00000027241.10, intron 1 of 10)	251	ENSMUST00000195402.1	ENSMUSG00000026072	ENSMUST00000027241			Il1r1			protein_coding
Sox9_E16_Sample1_peak_776	chr1	40279123	40280129	+	155	NA	intron (ENSMUST00000114795.2, intron 1 of 10)	protein_coding-intron (ENSMUST00000027241.10, intron 1 of 10)	12969	ENSMUST00000195402.1	ENSMUSG00000026072	ENSMUST00000027241			Il1r1			protein_coding
Sox9_E16_Sample1_peak_777	chr1	40324510	40326084	+	176	NA	promoter-TSS (ENSMUST00000193388.1)	protein_coding-promoter-TSS (ENSMUST00000193388.1)	-314	ENSMUST00000193388.1	ENSMUSG00000070942	ENSMUST00000192551			Il1rl2			protein_coding
Sox9_E16_Sample1_peak_778	chr1	40465524	40466168	+	658	NA	promoter-TSS (ENSMUST00000087983.7)	protein_coding-promoter-TSS (ENSMUST00000087983.7)	-124	ENSMUST00000193793.5	ENSMUSG00000026070	ENSMUST00000167723			Il18r1			protein_coding
Sox9_E16_Sample1_peak_779	chr1	40499251	40500025	+	140	NA	exon (ENSMUST00000108044.3, exon 11 of 11)	protein_coding-exon (ENSMUST00000108044.3, exon 11 of 11)	-15724	ENSMUST00000027237.11	ENSMUSG00000026068	ENSMUST00000159724			Il18rap			protein_coding
Sox9_E16_Sample1_peak_780	chr1	40501675	40502060	+	48	NA	Intergenic	Intergenic	-13495	ENSMUST00000027237.11	ENSMUSG00000026068	ENSMUST00000159724			Il18rap			protein_coding
Sox9_E16_Sample1_peak_782	chr1	40665657	40666402	+	85	NA	Intergenic	Intergenic	-14545	ENSMUST00000027231.12	ENSMUSG00000026062	ENSMUST00000192345			Slc9a2			protein_coding
Sox9_E16_Sample1_peak_783	chr1	40680715	40682104	+	565	NA	promoter-TSS (ENSMUST00000192345.1)	protein_coding-promoter-TSS (ENSMUST00000192345.1)	-188	ENSMUST00000192345.1	ENSMUSG00000026062	ENSMUST00000192345			Slc9a2			protein_coding
Sox9_E16_Sample1_peak_784	chr1	40790047	40790977	+	601	NA	exon (ENSMUST00000039672.5, exon 1 of 6)	protein_coding-exon (ENSMUST00000039672.5, exon 1 of 6)	145	ENSMUST00000144385.1	ENSMUSG00000041945	ENSMUST00000144385			Mfsd9			protein_coding
Sox9_E16_Sample1_peak_785	chr1	41157641	41158247	+	91	NA	Intergenic	Intergenic	23308	ENSMUST00000194002.1	ENSMUSG00000104072	ENSMUST00000194002			4930448I06Rik			lncRNA
Sox9_E16_Sample1_peak_787	chr1	41274776	41275605	+	147	NA	Intergenic	Intergenic	-93938	ENSMUST00000194002.1	ENSMUSG00000104072	ENSMUST00000194002			4930448I06Rik			lncRNA
Sox9_E16_Sample1_peak_788	chr1	41389820	41390880	+	333	NA	Intergenic	Intergenic	139193	ENSMUST00000191087.1	ENSMUSG00000100185	ENSMUST00000191087			Gm28634			lncRNA
Sox9_E16_Sample1_peak_790	chr1	41652331	41653318	+	145	NA	Intergenic	Intergenic	-123281	ENSMUST00000191087.1	ENSMUSG00000100185	ENSMUST00000191087			Gm28634			lncRNA
Sox9_E16_Sample1_peak_791	chr1	41810516	41810906	+	172	NA	intron (ENSMUST00000186391.1, intron 1 of 5)	lncRNA-intron (ENSMUST00000186391.1, intron 1 of 5)	28903	ENSMUST00000186391.1	ENSMUSG00000100832	ENSMUST00000187227			Gm29260			lncRNA
Sox9_E16_Sample1_peak_792	chr1	41831733	41831890	+	64	NA	intron (ENSMUST00000186391.1, intron 1 of 5)	lncRNA-intron (ENSMUST00000186391.1, intron 1 of 5)	50003	ENSMUST00000186391.1	ENSMUSG00000100832	ENSMUST00000187227			Gm29260			lncRNA
Sox9_E16_Sample1_peak_794	chr1	41918978	41919518	+	35	NA	intron (ENSMUST00000187227.1, intron 1 of 1)	lncRNA-intron (ENSMUST00000186391.1, intron 4 of 5)	896	ENSMUST00000187227.1	ENSMUSG00000100832	ENSMUST00000187227			Gm29260			lncRNA
Sox9_E16_Sample1_peak_795	chr1	42226194	42226792	+	147	NA	Intergenic	Intergenic	-3233	ENSMUST00000066196.1	ENSMUSG00000053640	ENSMUST00000188087			Gm9915			lncRNA
Sox9_E16_Sample1_peak_796	chr1	42491132	42492073	+	205	NA	promoter-TSS (ENSMUST00000191992.1)	TEC-promoter-TSS (ENSMUST00000191992.1)	-211	ENSMUST00000191992.1	ENSMUSG00000103106	ENSMUST00000191992			Gm37047			TEC
Sox9_E16_Sample1_peak_797	chr1	42504472	42505138	+	51	NA	Intergenic	Intergenic	12992	ENSMUST00000191992.1	ENSMUSG00000103106	ENSMUST00000191992			Gm37047			TEC
Sox9_E16_Sample1_peak_798	chr1	42539649	42540245	+	45	NA	Intergenic	Intergenic	48134	ENSMUST00000191992.1	ENSMUSG00000103106	ENSMUST00000191992			Gm37047			TEC
Sox9_E16_Sample1_peak_800	chr1	42695091	42696746	+	73	NA	exon (ENSMUST00000054883.3, exon 1 of 1)	protein_coding-exon (ENSMUST00000054883.3, exon 1 of 1)	150	ENSMUST00000054883.3	ENSMUSG00000045515	ENSMUST00000239323			Pou3f3			protein_coding
Sox9_E16_Sample1_peak_801	chr1	42697909	42698497	+	72	NA	exon (ENSMUST00000054883.3, exon 1 of 1)	protein_coding-exon (ENSMUST00000054883.3, exon 1 of 1)	2435	ENSMUST00000054883.3	ENSMUSG00000045515	ENSMUST00000239323			Pou3f3			protein_coding
Sox9_E16_Sample1_peak_802	chr1	42713347	42714802	+	76	NA	promoter-TSS (ENSMUST00000180589.1)	lncRNA-promoter-TSS (ENSMUST00000180589.1)	-620	ENSMUST00000180589.1	ENSMUSG00000097063	ENSMUST00000192894			Pantr2			lncRNA
Sox9_E16_Sample1_peak_803	chr1	42850865	42851920	+	1217	NA	exon (ENSMUST00000057208.12, exon 1 of 11)	protein_coding-exon (ENSMUST00000057208.12, exon 1 of 11)	107	ENSMUST00000188174.6	ENSMUSG00000060679	ENSMUST00000185376			Mrps9			protein_coding
Sox9_E16_Sample1_peak_804	chr1	42878401	42879416	+	169	NA	intron (ENSMUST00000188174.6, intron 2 of 3)	protein_coding-intron (ENSMUST00000057208.12, intron 2 of 10)	-8829	ENSMUST00000201108.3	ENSMUSG00000060679	ENSMUST00000185376			Mrps9			protein_coding
Sox9_E16_Sample1_peak_805	chr1	42894440	42895420	+	212	NA	intron (ENSMUST00000185376.6, intron 5 of 7)	protein_coding-intron (ENSMUST00000057208.12, intron 5 of 10)	7193	ENSMUST00000201108.3	ENSMUSG00000060679	ENSMUST00000185376			Mrps9			protein_coding
Sox9_E16_Sample1_peak_807	chr1	42952565	42953624	+	186	NA	promoter-TSS (ENSMUST00000179655.1)	protein_coding-promoter-TSS (ENSMUST00000179655.1)	-45	ENSMUST00000179655.1	ENSMUSG00000041907	ENSMUST00000187998			Gpr45			protein_coding
Sox9_E16_Sample1_peak_809	chr1	43046508	43047691	+	290	NA	TTS (ENSMUST00000095014.7)	protein_coding-TTS (ENSMUST00000095014.7)	-9168	ENSMUST00000185980.1	ENSMUSG00000100269	ENSMUST00000185980			Gm28782			lncRNA
Sox9_E16_Sample1_peak_810	chr1	43066132	43066649	+	125	NA	intron (ENSMUST00000188728.1, intron 3 of 4)	protein_coding-intron (ENSMUST00000095014.7, intron 5 of 12)	-5457	ENSMUST00000188598.1	ENSMUSG00000070939	ENSMUST00000187525			Tgfbrap1			protein_coding
Sox9_E16_Sample1_peak_811	chr1	43070447	43071306	+	70	NA	TTS (ENSMUST00000190427.6)	protein_coding-TTS (ENSMUST00000190427.6)	-9943	ENSMUST00000188598.1	ENSMUSG00000070939	ENSMUST00000187525			Tgfbrap1			protein_coding
Sox9_E16_Sample1_peak_812	chr1	43091801	43093020	+	501	NA	promoter-TSS (ENSMUST00000039080.3)	lncRNA-promoter-TSS (ENSMUST00000039080.3)	37	ENSMUST00000188728.1	ENSMUSG00000070939	ENSMUST00000187525			Tgfbrap1			protein_coding
Sox9_E16_Sample1_peak_813	chr1	43098145	43099116	+	1044	NA	promoter-TSS (ENSMUST00000010434.7)	protein_coding-promoter-TSS (ENSMUST00000010434.7)	7	ENSMUST00000187872.1	ENSMUSG00000070939	ENSMUST00000187525			Tgfbrap1			protein_coding
Sox9_E16_Sample1_peak_814	chr1	43124781	43125155	+	64	NA	intron (ENSMUST00000008280.13, intron 5 of 5)	protein_coding-intron (ENSMUST00000008280.13, intron 5 of 5)	26258	ENSMUST00000010434.7	ENSMUSG00000010290	ENSMUST00000010434			AI597479			protein_coding
Sox9_E16_Sample1_peak_815	chr1	43152014	43153124	+	64	NA	intron (ENSMUST00000187357.1, intron 1 of 2)	protein_coding-intron (ENSMUST00000008280.13, intron 2 of 5)	11392	ENSMUST00000008280.13	ENSMUSG00000008136	ENSMUST00000008280			Fhl2			protein_coding
Sox9_E16_Sample1_peak_816	chr1	43163349	43164325	+	556	NA	exon (ENSMUST00000008280.13, exon 1 of 6)	protein_coding-exon (ENSMUST00000008280.13, exon 1 of 6)	124	ENSMUST00000008280.13	ENSMUSG00000008136	ENSMUST00000008280			Fhl2			protein_coding
Sox9_E16_Sample1_peak_817	chr1	43216024	43216372	+	58	NA	Intergenic	Intergenic	-19214	ENSMUST00000185893.1	ENSMUSG00000008136	ENSMUST00000008280			Fhl2			protein_coding
Sox9_E16_Sample1_peak_818	chr1	43299404	43300106	+	163	NA	intron (ENSMUST00000189899.1, intron 2 of 5)	lncRNA-intron (ENSMUST00000189899.1, intron 2 of 5)	3170	ENSMUST00000189899.1	ENSMUSG00000099576	ENSMUST00000189899			Gm29040			lncRNA
Sox9_E16_Sample1_peak_819	chr1	43305356	43306910	+	568	NA	Intergenic	Intergenic	-3208	ENSMUST00000189899.1	ENSMUSG00000099576	ENSMUST00000189899			Gm29040			lncRNA
Sox9_E16_Sample1_peak_820	chr1	43404829	43405451	+	58	NA	Intergenic	Intergenic	-4444	ENSMUST00000189199.1	ENSMUSG00000101923	ENSMUST00000189199			Gm29041			processed_pseudogene
Sox9_E16_Sample1_peak_822	chr1	43444818	43446903	+	917	NA	exon (ENSMUST00000086421.8, exon 1 of 5)	protein_coding-exon (ENSMUST00000086421.8, exon 1 of 5)	109	ENSMUST00000086421.8	ENSMUSG00000066877	ENSMUST00000086421			Nck2			protein_coding
Sox9_E16_Sample1_peak_823	chr1	43463902	43464666	+	246	NA	intron (ENSMUST00000086421.8, intron 1 of 4)	protein_coding-intron (ENSMUST00000086421.8, intron 1 of 4)	7011	ENSMUST00000124817.1	ENSMUSG00000066877	ENSMUST00000086421			Nck2			protein_coding
Sox9_E16_Sample1_peak_824	chr1	43471707	43472787	+	282	NA	intron (ENSMUST00000086421.8, intron 1 of 4)	protein_coding-intron (ENSMUST00000086421.8, intron 1 of 4)	14974	ENSMUST00000124817.1	ENSMUSG00000066877	ENSMUST00000086421			Nck2			protein_coding
Sox9_E16_Sample1_peak_826	chr1	43502037	43502675	+	47	NA	intron (ENSMUST00000086421.8, intron 1 of 4)	protein_coding-intron (ENSMUST00000086421.8, intron 1 of 4)	13909	ENSMUST00000194710.1	ENSMUSG00000103422	ENSMUST00000194710			Gm37536			TEC
Sox9_E16_Sample1_peak_827	chr1	43508908	43509272	+	130	NA	intron (ENSMUST00000086421.8, intron 1 of 4)	protein_coding-intron (ENSMUST00000086421.8, intron 1 of 4)	20643	ENSMUST00000194710.1	ENSMUSG00000103422	ENSMUST00000194710			Gm37536			TEC
Sox9_E16_Sample1_peak_828	chr1	43554545	43556081	+	235	NA	intron (ENSMUST00000086421.8, intron 4 of 4)	protein_coding-intron (ENSMUST00000086421.8, intron 4 of 4)	-4960	ENSMUST00000193169.1	ENSMUSG00000103945	ENSMUST00000193169			Gm38228			TEC
Sox9_E16_Sample1_peak_829	chr1	43561719	43562869	+	328	NA	TTS (ENSMUST00000193169.1)	TEC-TTS (ENSMUST00000193169.1)	2021	ENSMUST00000193169.1	ENSMUSG00000103945	ENSMUST00000193169			Gm38228			TEC
Sox9_E16_Sample1_peak_830	chr1	43593743	43595192	+	116	NA	Intergenic	Intergenic	34194	ENSMUST00000193169.1	ENSMUSG00000103945	ENSMUST00000193169			Gm38228			TEC
Sox9_E16_Sample1_peak_831	chr1	43694668	43695428	+	269	NA	Intergenic	Intergenic	-35554	ENSMUST00000027217.8	ENSMUSG00000026051	ENSMUST00000027217			Ecrg4			protein_coding
Sox9_E16_Sample1_peak_832	chr1	43698428	43698992	+	179	NA	Intergenic	Intergenic	-31892	ENSMUST00000027217.8	ENSMUSG00000026051	ENSMUST00000027217			Ecrg4			protein_coding
Sox9_E16_Sample1_peak_834	chr1	43730288	43730994	+	520	NA	promoter-TSS (ENSMUST00000027217.8)	protein_coding-promoter-TSS (ENSMUST00000027217.8)	39	ENSMUST00000027217.8	ENSMUSG00000026051	ENSMUST00000027217			Ecrg4			protein_coding
Sox9_E16_Sample1_peak_835	chr1	43783289	43784014	+	170	NA	intron (ENSMUST00000153317.5, intron 1 of 3)	protein_coding-intron (ENSMUST00000076997.12, intron 6 of 14)	-2259	ENSMUST00000163003.1	ENSMUSG00000090243	ENSMUST00000163003			Gm16103			processed_pseudogene
Sox9_E16_Sample1_peak_836	chr1	43826783	43828294	+	971	NA	promoter-TSS (ENSMUST00000136179.7)	protein_coding-promoter-TSS (ENSMUST00000136179.7)	203	ENSMUST00000076997.12	ENSMUSG00000057363	ENSMUST00000128261			Uxs1			protein_coding
Sox9_E16_Sample1_peak_837	chr1	43879114	43879521	+	78	NA	Intergenic	Intergenic	-8734	ENSMUST00000191395.1	ENSMUSG00000100701	ENSMUST00000191395			Gm19587			processed_pseudogene
Sox9_E16_Sample1_peak_838	chr1	43933239	43934608	+	1039	NA	promoter-TSS (ENSMUST00000087933.9)	protein_coding-promoter-TSS (ENSMUST00000087933.9)	-84	ENSMUST00000087933.9	ENSMUSG00000041763	ENSMUST00000190401			Tpp2			protein_coding
Sox9_E16_Sample1_peak_839	chr1	44041942	44042781	+	324	NA	Intergenic	Intergenic	19575	ENSMUST00000168641.1	ENSMUSG00000091844	ENSMUST00000168641			Gm8251			protein_coding
Sox9_E16_Sample1_peak_840	chr1	44101562	44103041	+	1316	NA	promoter-TSS (ENSMUST00000027215.11)	protein_coding-promoter-TSS (ENSMUST00000027215.11)	42	ENSMUST00000128190.7	ENSMUSG00000026049	ENSMUST00000150911			Tex30			protein_coding
Sox9_E16_Sample1_peak_841	chr1	44118409	44120288	+	1191	NA	promoter-TSS (ENSMUST00000027213.13)	protein_coding-promoter-TSS (ENSMUST00000027213.13)	-160	ENSMUST00000186280.1	ENSMUSG00000041684	ENSMUST00000138521			Bivm			protein_coding
Sox9_E16_Sample1_peak_842	chr1	44147219	44148932	+	1185	NA	exon (ENSMUST00000027214.3, exon 1 of 15)	protein_coding-exon (ENSMUST00000027214.3, exon 1 of 15)	143	ENSMUST00000145406.1	ENSMUSG00000026048	ENSMUST00000139510			Ercc5			protein_coding
Sox9_E16_Sample1_peak_843	chr1	44198479	44199393	+	157	NA	Intergenic	Intergenic	-13226	ENSMUST00000161563.1	ENSMUSG00000089703	ENSMUST00000161563			Gm15833			processed_pseudogene
Sox9_E16_Sample1_peak_844	chr1	44551312	44553348	+	1020	NA	promoter-TSS (ENSMUST00000161066.7)	protein_coding-promoter-TSS (ENSMUST00000161066.7)	-267	ENSMUST00000161066.7	ENSMUSG00000056870	ENSMUST00000074525			Gulp1			protein_coding
Sox9_E16_Sample1_peak_845	chr1	44825768	44826206	+	172	NA	Intergenic	Intergenic	-13184	ENSMUST00000190083.1	ENSMUSG00000100434	ENSMUST00000190083			Gm3489			processed_pseudogene
Sox9_E16_Sample1_peak_846	chr1	45135438	45135779	+	28	NA	Intergenic	Intergenic	-42459	ENSMUST00000189212.1	ENSMUSG00000101937	ENSMUST00000189212			Gm5268			processed_pseudogene
Sox9_E16_Sample1_peak_847	chr1	45313687	45314381	+	187	NA	intron (ENSMUST00000129611.1, intron 1 of 3)	protein_coding-intron (ENSMUST00000087883.12, intron 1 of 50)	2361	ENSMUST00000198698.1	ENSMUSG00000105211	ENSMUST00000198698			Gm47302			miRNA
Sox9_E16_Sample1_peak_850	chr1	45501972	45503399	+	237	NA	intron (ENSMUST00000086430.4, intron 1 of 53)	protein_coding-intron (ENSMUST00000086430.4, intron 1 of 53)	597	ENSMUST00000086430.4	ENSMUSG00000026042	ENSMUST00000150143			Col5a2			protein_coding
Sox9_E16_Sample1_peak_851	chr1	45541354	45542345	+	130	NA	Intergenic	Intergenic	-21095	ENSMUST00000186840.1	ENSMUSG00000100361	ENSMUST00000186840			Gm7063			processed_pseudogene
Sox9_E16_Sample1_peak_852	chr1	45580290	45581007	+	58	NA	Intergenic	Intergenic	-21378	ENSMUST00000185744.1	ENSMUSG00000100894	ENSMUST00000185744			Gm8304			processed_pseudogene
Sox9_E16_Sample1_peak_853	chr1	45628009	45628296	+	34	NA	Intergenic	Intergenic	26126	ENSMUST00000185744.1	ENSMUSG00000100894	ENSMUST00000185744			Gm8304			processed_pseudogene
Sox9_E16_Sample1_peak_854	chr1	45735063	45735594	+	267	NA	Intergenic	Intergenic	-11567	ENSMUST00000083321.1	ENSMUSG00000065255	ENSMUST00000083321			Gm23974			snoRNA
Sox9_E16_Sample1_peak_855	chr1	45766033	45766674	+	64	NA	Intergenic	Intergenic	-1984	ENSMUST00000187682.1	ENSMUSG00000100843	ENSMUST00000187682			Gm8307			processed_pseudogene
Sox9_E16_Sample1_peak_856	chr1	45780635	45781497	+	516	NA	Intergenic	Intergenic	8104	ENSMUST00000157139.1	ENSMUSG00000087764	ENSMUST00000157139			Gm23984			ribozyme
Sox9_E16_Sample1_peak_857	chr1	45794865	45796145	+	1327	NA	promoter-TSS (ENSMUST00000142145.1)	protein_coding-promoter-TSS (ENSMUST00000142145.1)	2	ENSMUST00000142145.1	ENSMUSG00000025995	ENSMUST00000027139			Wdr75			protein_coding
Sox9_E16_Sample1_peak_859	chr1	45825029	45825454	+	64	NA	Intergenic	Intergenic	2683	ENSMUST00000186651.1	ENSMUSG00000025995	ENSMUST00000027139			Wdr75			protein_coding
Sox9_E16_Sample1_peak_860	chr1	45830600	45831068	+	426	NA	Intergenic	Intergenic	5954	ENSMUST00000191371.1	ENSMUSG00000099850	ENSMUST00000191371			Gm28906			processed_pseudogene
Sox9_E16_Sample1_peak_861	chr1	45865974	45867078	+	327	NA	Intergenic	Intergenic	-8772	ENSMUST00000153604.1	ENSMUSG00000084817	ENSMUST00000153604			Gm5526			processed_pseudogene
Sox9_E16_Sample1_peak_863	chr1	45913242	45913938	+	99	NA	intron (ENSMUST00000027137.10, intron 5 of 7)	protein_coding-intron (ENSMUST00000027137.10, intron 5 of 7)	7967	ENSMUST00000190055.1	ENSMUSG00000099381	ENSMUST00000190055			Gm18303			processed_pseudogene
Sox9_E16_Sample1_peak_864	chr1	45925215	45926542	+	2011	NA	promoter-TSS (ENSMUST00000027137.10)	protein_coding-promoter-TSS (ENSMUST00000027137.10)	-269	ENSMUST00000191247.6	ENSMUSG00000025993	ENSMUST00000186804			Slc40a1			protein_coding
Sox9_E16_Sample1_peak_867	chr1	45985970	45986909	+	554	NA	Intergenic	Intergenic	4891	ENSMUST00000085632.3	ENSMUSG00000070896	ENSMUST00000085632			Rpl23a-ps1			processed_pseudogene
Sox9_E16_Sample1_peak_868	chr1	46018359	46019298	+	324	NA	Intergenic	Intergenic	-6808	ENSMUST00000182781.1	ENSMUSG00000090682	ENSMUST00000182781			Gm3852			processed_pseudogene
Sox9_E16_Sample1_peak_869	chr1	46066477	46067390	+	660	NA	promoter-TSS (ENSMUST00000238212.1)	protein_coding-promoter-TSS (ENSMUST00000238212.1)	80	ENSMUST00000238212.1	ENSMUSG00000041144	ENSMUST00000190792			Dnah7b			protein_coding
Sox9_E16_Sample1_peak_870	chr1	46213495	46213980	+	138	NA	intron (ENSMUST00000069293.9, intron 33 of 65)	protein_coding-intron (ENSMUST00000069293.9, intron 33 of 65)	-21511	ENSMUST00000187548.1	ENSMUSG00000041144	ENSMUST00000190792			Dnah7b			protein_coding
Sox9_E16_Sample1_peak_872	chr1	46408625	46409170	+	130	NA	Intergenic	Intergenic	-5605	ENSMUST00000188705.1	ENSMUSG00000101262	ENSMUST00000188705			Gm8326			processed_pseudogene
Sox9_E16_Sample1_peak_873	chr1	46425205	46425891	+	122	NA	promoter-TSS (ENSMUST00000189749.6)	protein_coding-promoter-TSS (ENSMUST00000189749.6)	-44	ENSMUST00000189749.6	ENSMUSG00000101337	ENSMUST00000178395			Dnah7c			protein_coding
Sox9_E16_Sample1_peak_874	chr1	46852671	46854389	+	1457	NA	exon (ENSMUST00000027131.5, exon 1 of 10)	protein_coding-exon (ENSMUST00000027131.5, exon 1 of 10)	516	ENSMUST00000027131.5	ENSMUSG00000025986	ENSMUST00000027131			Slc39a10			protein_coding
Sox9_E16_Sample1_peak_875	chr1	46862943	46864666	+	693	NA	intron (ENSMUST00000186852.1, intron 1 of 1)	protein_coding-intron (ENSMUST00000185520.1, intron 1 of 1)	-9758	ENSMUST00000027131.5	ENSMUSG00000025986	ENSMUST00000027131			Slc39a10			protein_coding
Sox9_E16_Sample1_peak_876	chr1	46885268	46886708	+	786	NA	intron (ENSMUST00000186852.1, intron 1 of 1)	protein_coding-intron (ENSMUST00000185520.1, intron 1 of 1)	2082	ENSMUST00000185520.1	ENSMUSG00000025986	ENSMUST00000027131			Slc39a10			protein_coding
Sox9_E16_Sample1_peak_876-2	chr1	46887294	46888758	+	786	NA	promoter-TSS (ENSMUST00000185520.1)	protein_coding-promoter-TSS (ENSMUST00000185520.1)	44	ENSMUST00000185520.1	ENSMUSG00000025986	ENSMUST00000027131			Slc39a10			protein_coding
Sox9_E16_Sample1_peak_877	chr1	46894197	46894956	+	189	NA	Intergenic	Intergenic	-1724	ENSMUST00000186852.1	ENSMUSG00000025986	ENSMUST00000027131			Slc39a10			protein_coding
Sox9_E16_Sample1_peak_878	chr1	46901730	46902521	+	114	NA	Intergenic	Intergenic	-5246	ENSMUST00000185210.1	ENSMUSG00000100160	ENSMUST00000185210			Gm28527			processed_pseudogene
Sox9_E16_Sample1_peak_879	chr1	46970466	46970933	+	51	NA	Intergenic	Intergenic	-73820	ENSMUST00000185210.1	ENSMUSG00000100160	ENSMUST00000185210			Gm28527			processed_pseudogene
Sox9_E16_Sample1_peak_881	chr1	47216495	47217220	+	64	NA	Intergenic	Intergenic	63396	ENSMUST00000190006.1	ENSMUSG00000101447	ENSMUST00000190006			Gm28826			lncRNA
Sox9_E16_Sample1_peak_883	chr1	47629356	47629973	+	58	NA	Intergenic	Intergenic	23668	ENSMUST00000194762.1	ENSMUSG00000104067	ENSMUST00000194762			Gm37196			TEC
Sox9_E16_Sample1_peak_885	chr1	50682703	50683677	+	106	NA	Intergenic	Intergenic	123428	ENSMUST00000122582.1	ENSMUSG00000084531	ENSMUST00000122582			Gm25843			misc_RNA
Sox9_E16_Sample1_peak_887	chr1	50926482	50928264	+	515	NA	promoter-TSS (ENSMUST00000081851.3)	protein_coding-promoter-TSS (ENSMUST00000081851.3)	-146	ENSMUST00000081851.3	ENSMUSG00000026109	ENSMUST00000139157			Tmeff2			protein_coding
Sox9_E16_Sample1_peak_888	chr1	50962219	50962771	+	39	NA	intron (ENSMUST00000081851.3, intron 4 of 9)	protein_coding-intron (ENSMUST00000081851.3, intron 4 of 9)	34976	ENSMUST00000081851.3	ENSMUSG00000026109	ENSMUST00000139157			Tmeff2			protein_coding
Sox9_E16_Sample1_peak_889	chr1	51241899	51243004	+	50	NA	intron (ENSMUST00000189867.1, intron 4 of 4)	lncRNA-intron (ENSMUST00000189867.1, intron 4 of 4)	-46675	ENSMUST00000051572.7	ENSMUSG00000045954	ENSMUST00000051572			Cavin2			protein_coding
Sox9_E16_Sample1_peak_890	chr1	51265026	51266155	+	261	NA	intron (ENSMUST00000189867.1, intron 2 of 4)	lncRNA-intron (ENSMUST00000189867.1, intron 2 of 4)	-23536	ENSMUST00000051572.7	ENSMUSG00000045954	ENSMUST00000051572			Cavin2			protein_coding
Sox9_E16_Sample1_peak_891	chr1	51271617	51271974	+	78	NA	intron (ENSMUST00000189867.1, intron 2 of 4)	lncRNA-intron (ENSMUST00000189867.1, intron 2 of 4)	-17331	ENSMUST00000051572.7	ENSMUSG00000045954	ENSMUST00000051572			Cavin2			protein_coding
Sox9_E16_Sample1_peak_892	chr1	51277976	51278168	+	51	NA	intron (ENSMUST00000189867.1, intron 2 of 4)	lncRNA-intron (ENSMUST00000189867.1, intron 2 of 4)	-11054	ENSMUST00000051572.7	ENSMUSG00000045954	ENSMUST00000051572			Cavin2			protein_coding
Sox9_E16_Sample1_peak_893	chr1	51288295	51290012	+	965	NA	promoter-TSS (ENSMUST00000051572.7)	protein_coding-promoter-TSS (ENSMUST00000051572.7)	27	ENSMUST00000051572.7	ENSMUSG00000045954	ENSMUST00000051572			Cavin2			protein_coding
Sox9_E16_Sample1_peak_894	chr1	51333248	51334444	+	643	NA	promoter-TSS (ENSMUST00000189867.1)	lncRNA-promoter-TSS (ENSMUST00000189867.1)	-67	ENSMUST00000189867.1	ENSMUSG00000101799	ENSMUST00000189867			9330175M20Rik			lncRNA
Sox9_E16_Sample1_peak_896	chr1	51466606	51467014	+	28	NA	exon (ENSMUST00000186003.6, exon 7 of 7)	protein_coding-exon (ENSMUST00000186003.6, exon 7 of 7)	6586	ENSMUST00000185961.1	ENSMUSG00000026107	ENSMUST00000188204			Nabp1			protein_coding
Sox9_E16_Sample1_peak_897	chr1	51477709	51478991	+	1424	NA	promoter-TSS (ENSMUST00000027279.11)	protein_coding-promoter-TSS (ENSMUST00000027279.11)	49	ENSMUST00000190103.6	ENSMUSG00000026107	ENSMUST00000188204			Nabp1			protein_coding
Sox9_E16_Sample1_peak_898	chr1	51486554	51487003	+	64	NA	Intergenic	Intergenic	-8353	ENSMUST00000188051.6	ENSMUSG00000026107	ENSMUST00000188204			Nabp1			protein_coding
Sox9_E16_Sample1_peak_899	chr1	51508648	51509927	+	564	NA	TTS (ENSMUST00000189410.1)	lncRNA-TTS (ENSMUST00000189410.1)	3042	ENSMUST00000190169.1	ENSMUSG00000099413	ENSMUST00000190169			Gm17767			lncRNA
Sox9_E16_Sample1_peak_900	chr1	51529930	51531518	+	328	NA	intron (ENSMUST00000189410.1, intron 3 of 3)	lncRNA-intron (ENSMUST00000189410.1, intron 3 of 3)	-1355	ENSMUST00000194442.1	ENSMUSG00000103424	ENSMUST00000194442			Gm37535			TEC
Sox9_E16_Sample1_peak_901	chr1	51596740	51597692	+	261	NA	promoter-TSS (ENSMUST00000189410.1)	lncRNA-promoter-TSS (ENSMUST00000189410.1)	-498	ENSMUST00000189410.1	ENSMUSG00000099413	ENSMUST00000190169			Gm17767			lncRNA
Sox9_E16_Sample1_peak_902	chr1	51643525	51644598	+	216	NA	Intergenic	Intergenic	-47343	ENSMUST00000189410.1	ENSMUSG00000099413	ENSMUST00000190169			Gm17767			lncRNA
Sox9_E16_Sample1_peak_903	chr1	51687597	51688352	+	181	NA	Intergenic	Intergenic	9926	ENSMUST00000189576.1	ENSMUSG00000101741	ENSMUST00000189576			Gm28055			lncRNA
Sox9_E16_Sample1_peak_904	chr1	51697194	51697777	+	172	NA	exon (ENSMUST00000186769.1, exon 2 of 2)	lncRNA-exon (ENSMUST00000186769.1, exon 2 of 2)	415	ENSMUST00000189576.1	ENSMUSG00000101741	ENSMUST00000189576			Gm28055			lncRNA
Sox9_E16_Sample1_peak_905	chr1	51720064	51720492	+	207	NA	intron (ENSMUST00000186769.1, intron 1 of 1)	lncRNA-intron (ENSMUST00000186769.1, intron 1 of 1)	-22378	ENSMUST00000189576.1	ENSMUSG00000101741	ENSMUST00000189576			Gm28055			lncRNA
Sox9_E16_Sample1_peak_906	chr1	51747582	51748555	+	337	NA	Intergenic	Intergenic	-1125	ENSMUST00000186769.1	ENSMUSG00000101741	ENSMUST00000189576			Gm28055			lncRNA
Sox9_E16_Sample1_peak_908	chr1	51837940	51838475	+	143	NA	intron (ENSMUST00000018561.13, intron 3 of 30)	protein_coding-intron (ENSMUST00000018561.13, intron 3 of 30)	10911	ENSMUST00000186428.1	ENSMUSG00000101724	ENSMUST00000186428			Gm29453			lncRNA
Sox9_E16_Sample1_peak_909	chr1	51848888	51850120	+	271	NA	promoter-TSS (ENSMUST00000186428.1)	lncRNA-promoter-TSS (ENSMUST00000186428.1)	-386	ENSMUST00000186428.1	ENSMUSG00000101724	ENSMUST00000186428			Gm29453			lncRNA
Sox9_E16_Sample1_peak_910	chr1	51856075	51857216	+	188	NA	intron (ENSMUST00000018561.13, intron 3 of 30)	protein_coding-intron (ENSMUST00000018561.13, intron 3 of 30)	-5539	ENSMUST00000123299.1	ENSMUSG00000018417	ENSMUST00000114537			Myo1b			protein_coding
Sox9_E16_Sample1_peak_911	chr1	51872800	51873123	+	58	NA	intron (ENSMUST00000126657.1, intron 3 of 3)	protein_coding-intron (ENSMUST00000018561.13, intron 2 of 30)	6647	ENSMUST00000186817.1	ENSMUSG00000100313	ENSMUST00000186817			Gm28323			lncRNA
Sox9_E16_Sample1_peak_912	chr1	51893942	51894163	+	28	NA	intron (ENSMUST00000151525.7, intron 1 of 6)	protein_coding-intron (ENSMUST00000018561.13, intron 1 of 30)	2249	ENSMUST00000144694.1	ENSMUSG00000018417	ENSMUST00000114537			Myo1b			protein_coding
Sox9_E16_Sample1_peak_913	chr1	51895656	51896088	+	18	NA	intron (ENSMUST00000151525.7, intron 1 of 6)	protein_coding-intron (ENSMUST00000018561.13, intron 1 of 30)	429	ENSMUST00000144694.1	ENSMUSG00000018417	ENSMUST00000114537			Myo1b			protein_coding
Sox9_E16_Sample1_peak_914	chr1	51915077	51916157	+	753	NA	intron (ENSMUST00000126657.1, intron 1 of 3)	protein_coding-intron (ENSMUST00000018561.13, intron 1 of 30)	295	ENSMUST00000151525.7	ENSMUSG00000018417	ENSMUST00000114537			Myo1b			protein_coding
Sox9_E16_Sample1_peak_915	chr1	51944596	51945077	+	71	NA	Intergenic	Intergenic	-3575	ENSMUST00000097103.4	ENSMUSG00000072324	ENSMUST00000097103			Gm8420			processed_pseudogene
Sox9_E16_Sample1_peak_916	chr1	51996340	51997494	+	357	NA	intron (ENSMUST00000168302.7, intron 2 of 24)	protein_coding-intron (ENSMUST00000168302.7, intron 2 of 24)	9769	ENSMUST00000168302.7	ENSMUSG00000062939	ENSMUST00000168302			Stat4			protein_coding
Sox9_E16_Sample1_peak_917	chr1	52008348	52009132	+	99	NA	intron (ENSMUST00000187053.1, intron 1 of 4)	protein_coding-intron (ENSMUST00000027277.6, intron 1 of 23)	114	ENSMUST00000187053.1	ENSMUSG00000062939	ENSMUST00000168302			Stat4			protein_coding
Sox9_E16_Sample1_peak_918	chr1	52066559	52066962	+	45	NA	intron (ENSMUST00000027277.6, intron 4 of 23)	protein_coding-intron (ENSMUST00000027277.6, intron 4 of 23)	-10501	ENSMUST00000185516.1	ENSMUSG00000101628	ENSMUST00000185516			Gm28177			lncRNA
Sox9_E16_Sample1_peak_919	chr1	52088613	52089394	+	303	NA	intron (ENSMUST00000168302.7, intron 15 of 24)	protein_coding-intron (ENSMUST00000027277.6, intron 14 of 23)	2063	ENSMUST00000105087.1	ENSMUSG00000078291	ENSMUST00000105087			Gm3940			processed_pseudogene
Sox9_E16_Sample1_peak_920	chr1	52102797	52103637	+	122	NA	intron (ENSMUST00000185516.1, intron 11 of 33)	protein_coding-intron (ENSMUST00000027277.6, intron 21 of 23)	-2232	ENSMUST00000187554.1	ENSMUSG00000062939	ENSMUST00000168302			Stat4			protein_coding
Sox9_E16_Sample1_peak_921	chr1	52113346	52114085	+	555	NA	promoter-TSS (ENSMUST00000210323.1)	lncRNA-promoter-TSS (ENSMUST00000210323.1)	36	ENSMUST00000210323.1	ENSMUSG00000109599	ENSMUST00000210323			Gm31812			lncRNA
Sox9_E16_Sample1_peak_922	chr1	52118990	52120085	+	921	NA	promoter-TSS (ENSMUST00000070968.13)	protein_coding-promoter-TSS (ENSMUST00000070968.13)	-12	ENSMUST00000189347.6	ENSMUSG00000026104	ENSMUST00000189347			Stat1			protein_coding
Sox9_E16_Sample1_peak_923	chr1	52146535	52146977	+	39	NA	intron (ENSMUST00000185516.1, intron 26 of 33)	protein_coding-intron (ENSMUST00000070968.13, intron 15 of 24)	-3348	ENSMUST00000189075.1	ENSMUSG00000026104	ENSMUST00000189347			Stat1			protein_coding
Sox9_E16_Sample1_peak_924	chr1	52232176	52233698	+	1326	NA	promoter-TSS (ENSMUST00000114512.7)	protein_coding-promoter-TSS (ENSMUST00000114512.7)	-126	ENSMUST00000142976.1	ENSMUSG00000026103	ENSMUST00000114510			Gls			protein_coding
Sox9_E16_Sample1_peak_925	chr1	52269796	52270800	+	340	NA	Intergenic	Intergenic	18797	ENSMUST00000185256.1	ENSMUSG00000099648	ENSMUST00000185256			Gm5975			processed_pseudogene
Sox9_E16_Sample1_peak_927	chr1	52302779	52303570	+	64	NA	Intergenic	Intergenic	-14079	ENSMUST00000185256.1	ENSMUSG00000099648	ENSMUST00000185256			Gm5975			processed_pseudogene
Sox9_E16_Sample1_peak_928	chr1	52499714	52502274	+	363	NA	promoter-TSS (ENSMUST00000069792.13)	protein_coding-promoter-TSS (ENSMUST00000069792.13)	-315	ENSMUST00000069792.13	ENSMUSG00000002881	ENSMUST00000069792			Nab1			protein_coding
Sox9_E16_Sample1_peak_929	chr1	52578336	52579017	+	231	NA	intron (ENSMUST00000188544.1, intron 2 of 5)	lncRNA-intron (ENSMUST00000188544.1, intron 2 of 5)	1615	ENSMUST00000188544.1	ENSMUSG00000099878	ENSMUST00000188544			Gm28178			lncRNA
Sox9_E16_Sample1_peak_930	chr1	52581406	52581955	+	92	NA	intron (ENSMUST00000189527.1, intron 4 of 4)	lncRNA-intron (ENSMUST00000189527.1, intron 4 of 4)	-1389	ENSMUST00000188544.1	ENSMUSG00000099878	ENSMUST00000188544			Gm28178			lncRNA
Sox9_E16_Sample1_peak_931	chr1	52597055	52598650	+	122	NA	Intergenic	Intergenic	13334	ENSMUST00000179821.2	ENSMUSG00000100007	ENSMUST00000179821			Gm5527			processed_pseudogene
Sox9_E16_Sample1_peak_932	chr1	52630527	52631786	+	1047	NA	exon (ENSMUST00000190108.6, exon 1 of 4)	protein_coding-exon (ENSMUST00000190108.6, exon 1 of 4)	359	ENSMUST00000185790.6	ENSMUSG00000043015	ENSMUST00000165859			Nemp2			protein_coding
Sox9_E16_Sample1_peak_933	chr1	52640277	52640721	+	77	NA	intron (ENSMUST00000190108.6, intron 2 of 3)	protein_coding-intron (ENSMUST00000165859.7, intron 2 of 8)	-1017	ENSMUST00000186903.6	ENSMUSG00000043015	ENSMUST00000165859			Nemp2			protein_coding
Sox9_E16_Sample1_peak_934	chr1	52676465	52677139	+	23	NA	intron (ENSMUST00000156876.7, intron 2 of 6)	protein_coding-intron (ENSMUST00000087701.3, intron 2 of 5)	-7451	ENSMUST00000149887.1	ENSMUSG00000041439	ENSMUST00000087701			Mfsd6			protein_coding
Sox9_E16_Sample1_peak_935	chr1	52683149	52684247	+	305	NA	intron (ENSMUST00000156876.7, intron 2 of 6)	protein_coding-intron (ENSMUST00000087701.3, intron 2 of 5)	-14347	ENSMUST00000149887.1	ENSMUSG00000041439	ENSMUST00000087701			Mfsd6			protein_coding
Sox9_E16_Sample1_peak_936	chr1	52726330	52727720	+	928	NA	exon (ENSMUST00000087701.3, exon 1 of 6)	protein_coding-exon (ENSMUST00000087701.3, exon 1 of 6)	333	ENSMUST00000147421.1	ENSMUSG00000041439	ENSMUST00000087701			Mfsd6			protein_coding
Sox9_E16_Sample1_peak_938	chr1	52816755	52818008	+	630	NA	promoter-TSS (ENSMUST00000162351.1)	protein_coding-promoter-TSS (ENSMUST00000162351.1)	70	ENSMUST00000162351.1	ENSMUSG00000026102	ENSMUST00000159725			Inpp1			protein_coding
Sox9_E16_Sample1_peak_939	chr1	52844481	52845705	+	761	NA	promoter-TSS (ENSMUST00000044478.6)	protein_coding-promoter-TSS (ENSMUST00000044478.6)	47	ENSMUST00000044478.6	ENSMUSG00000041426	ENSMUST00000161125			Hibch			protein_coding
Sox9_E16_Sample1_peak_940	chr1	52952444	52953652	+	503	NA	promoter-TSS (ENSMUST00000050567.10)	protein_coding-promoter-TSS (ENSMUST00000050567.10)	-204	ENSMUST00000050567.10	ENSMUSG00000043629	ENSMUST00000190831			1700019D03Rik			protein_coding
Sox9_E16_Sample1_peak_941	chr1	53017967	53018425	+	69	NA	intron (ENSMUST00000191441.1, intron 1 of 1)	protein_coding-intron (ENSMUST00000191441.1, intron 1 of 1)	1983	ENSMUST00000191441.1	ENSMUSG00000043629	ENSMUST00000190831			1700019D03Rik			protein_coding
Sox9_E16_Sample1_peak_943	chr1	53194979	53195612	+	51	NA	promoter-TSS (ENSMUST00000191402.1)	lncRNA-promoter-TSS (ENSMUST00000191402.1)	-818	ENSMUST00000191402.1	ENSMUSG00000100763	ENSMUST00000191402			Gm28777			lncRNA
Sox9_E16_Sample1_peak_944	chr1	53296583	53297771	+	1317	NA	promoter-TSS (ENSMUST00000027266.3)	protein_coding-promoter-TSS (ENSMUST00000027266.3)	66	ENSMUST00000190734.1	ENSMUSG00000100679	ENSMUST00000190734			Gm28778			protein_coding
Sox9_E16_Sample1_peak_945	chr1	53313163	53314092	+	529	NA	promoter-TSS (ENSMUST00000027265.9)	protein_coding-promoter-TSS (ENSMUST00000027265.9)	3	ENSMUST00000027265.9	ENSMUSG00000026096	ENSMUST00000027265			Osgepl1			protein_coding
Sox9_E16_Sample1_peak_946	chr1	53351973	53352976	+	707	NA	promoter-TSS (ENSMUST00000136468.1)	protein_coding-promoter-TSS (ENSMUST00000136468.1)	96	ENSMUST00000136468.1	ENSMUSG00000026095	ENSMUST00000147021			Asnsd1			protein_coding
Sox9_E16_Sample1_peak_947	chr1	53393994	53394532	+	58	NA	Intergenic	Intergenic	3848	ENSMUST00000190697.1	ENSMUSG00000100069	ENSMUST00000190697			Gm6801			unprocessed_pseudogene
Sox9_E16_Sample1_peak_949	chr1	53646309	53646856	+	130	NA	intron (ENSMUST00000094964.6, intron 9 of 65)	protein_coding-intron (ENSMUST00000094964.6, intron 9 of 65)	60179	ENSMUST00000094964.6	ENSMUSG00000096141	ENSMUST00000094964			Dnah7a			protein_coding
Sox9_E16_Sample1_peak_950	chr1	53703861	53704806	+	67	NA	intron (ENSMUST00000189677.1, intron 1 of 3)	protein_coding-intron (ENSMUST00000094964.6, intron 1 of 65)	2428	ENSMUST00000094964.6	ENSMUSG00000096141	ENSMUST00000094964			Dnah7a			protein_coding
Sox9_E16_Sample1_peak_951	chr1	53706446	53707160	+	242	NA	promoter-TSS (ENSMUST00000094964.6)	protein_coding-promoter-TSS (ENSMUST00000094964.6)	-19	ENSMUST00000189677.1	ENSMUSG00000096141	ENSMUST00000094964			Dnah7a			protein_coding
Sox9_E16_Sample1_peak_953	chr1	53728562	53729241	+	172	NA	Intergenic	Intergenic	-22117	ENSMUST00000189677.1	ENSMUSG00000096141	ENSMUST00000094964			Dnah7a			protein_coding
Sox9_E16_Sample1_peak_954	chr1	53784303	53785637	+	1183	NA	intron (ENSMUST00000027263.13, intron 1 of 7)	protein_coding-intron (ENSMUST00000027263.13, intron 1 of 7)	187	ENSMUST00000185920.1	ENSMUSG00000026094	ENSMUST00000185920			Stk17b			protein_coding
Sox9_E16_Sample1_peak_955	chr1	53823487	53824388	+	325	NA	intron (ENSMUST00000087659.10, intron 28 of 28)	protein_coding-intron (ENSMUST00000087659.10, intron 28 of 28)	17234	ENSMUST00000150677.7	ENSMUSG00000042807	ENSMUST00000150677			Hecw2			protein_coding
Sox9_E16_Sample1_peak_956	chr1	53838671	53839286	+	51	NA	TTS (ENSMUST00000152870.1)	protein_coding-TTS (ENSMUST00000152870.1)	2193	ENSMUST00000150677.7	ENSMUSG00000042807	ENSMUST00000150677			Hecw2			protein_coding
Sox9_E16_Sample1_peak_957	chr1	53845424	53846786	+	246	NA	intron (ENSMUST00000152870.1, intron 4 of 5)	protein_coding-intron (ENSMUST00000087659.10, intron 21 of 28)	-3319	ENSMUST00000184834.1	ENSMUSG00000098443	ENSMUST00000184834			Mir7681			miRNA
Sox9_E16_Sample1_peak_959	chr1	53911823	53912199	+	51	NA	intron (ENSMUST00000120904.7, intron 13 of 28)	protein_coding-intron (ENSMUST00000087659.10, intron 13 of 28)	-25070	ENSMUST00000157324.1	ENSMUSG00000087949	ENSMUST00000157324			Gm24251			snRNA
Sox9_E16_Sample1_peak_960	chr1	53978024	53978431	+	147	NA	intron (ENSMUST00000146850.1, intron 2 of 3)	protein_coding-intron (ENSMUST00000087659.10, intron 2 of 28)	-91286	ENSMUST00000157324.1	ENSMUSG00000087949	ENSMUST00000157324			Gm24251			snRNA
Sox9_E16_Sample1_peak_961	chr1	54187511	54188407	+	215	NA	intron (ENSMUST00000146850.1, intron 1 of 3)	protein_coding-intron (ENSMUST00000087659.10, intron 1 of 28)	6089	ENSMUST00000120904.7	ENSMUSG00000042807	ENSMUST00000150677			Hecw2			protein_coding
Sox9_E16_Sample1_peak_962	chr1	54194073	54195229	+	482	NA	promoter-TSS (ENSMUST00000120904.7)	protein_coding-promoter-TSS (ENSMUST00000120904.7)	383	ENSMUST00000087659.10	ENSMUSG00000042807	ENSMUST00000150677			Hecw2			protein_coding
Sox9_E16_Sample1_peak_963	chr1	54250135	54251244	+	656	NA	promoter-TSS (ENSMUST00000027128.10)	protein_coding-promoter-TSS (ENSMUST00000027128.10)	6	ENSMUST00000161988.1	ENSMUSG00000025983	ENSMUST00000027128			Ccdc150			protein_coding
Sox9_E16_Sample1_peak_964	chr1	54363895	54364562	+	51	NA	intron (ENSMUST00000027128.10, intron 22 of 27)	protein_coding-intron (ENSMUST00000027128.10, intron 22 of 27)	9632	ENSMUST00000159682.1	ENSMUSG00000025983	ENSMUST00000027128			Ccdc150			protein_coding
Sox9_E16_Sample1_peak_965	chr1	54438438	54439279	+	394	NA	exon (ENSMUST00000041638.7, exon 1 of 18)	protein_coding-exon (ENSMUST00000041638.7, exon 1 of 18)	113	ENSMUST00000041638.7	ENSMUSG00000041303	ENSMUST00000189906			Gtf3c3			protein_coding
Sox9_E16_Sample1_peak_966	chr1	54556954	54558128	+	999	NA	promoter-TSS (ENSMUST00000189506.1)	protein_coding-promoter-TSS (ENSMUST00000189506.1)	86	ENSMUST00000189506.1	ENSMUSG00000073678	ENSMUST00000185817			Pgap1			protein_coding
Sox9_E16_Sample1_peak_967	chr1	54612305	54613394	+	189	NA	Intergenic	Intergenic	35764	ENSMUST00000189563.1	ENSMUSG00000052331	ENSMUST00000178685			Ankrd44			protein_coding
Sox9_E16_Sample1_peak_968	chr1	54640267	54641061	+	155	NA	Intergenic	Intergenic	7949	ENSMUST00000189563.1	ENSMUSG00000052331	ENSMUST00000178685			Ankrd44			protein_coding
Sox9_E16_Sample1_peak_969	chr1	54826386	54827048	+	70	NA	intron (ENSMUST00000044359.15, intron 2 of 27)	protein_coding-intron (ENSMUST00000044359.15, intron 2 of 27)	-13274	ENSMUST00000178905.1	ENSMUSG00000052331	ENSMUST00000178685			Ankrd44			protein_coding
Sox9_E16_Sample1_peak_970	chr1	54830069	54830735	+	168	NA	intron (ENSMUST00000180327.7, intron 1 of 7)	protein_coding-intron (ENSMUST00000044359.15, intron 1 of 27)	-16959	ENSMUST00000178905.1	ENSMUSG00000052331	ENSMUST00000178685			Ankrd44			protein_coding
Sox9_E16_Sample1_peak_971	chr1	54867120	54868036	+	78	NA	intron (ENSMUST00000180327.7, intron 1 of 7)	protein_coding-intron (ENSMUST00000044359.15, intron 1 of 27)	17133	ENSMUST00000177679.1	ENSMUSG00000052331	ENSMUST00000178685			Ankrd44			protein_coding
Sox9_E16_Sample1_peak_972	chr1	54872994	54873563	+	204	NA	intron (ENSMUST00000180327.7, intron 1 of 7)	protein_coding-intron (ENSMUST00000044359.15, intron 1 of 27)	11433	ENSMUST00000177679.1	ENSMUSG00000052331	ENSMUST00000178685			Ankrd44			protein_coding
Sox9_E16_Sample1_peak_973	chr1	54878183	54878621	+	64	NA	intron (ENSMUST00000180327.7, intron 1 of 7)	protein_coding-intron (ENSMUST00000044359.15, intron 1 of 27)	6309	ENSMUST00000177679.1	ENSMUSG00000052331	ENSMUST00000178685			Ankrd44			protein_coding
Sox9_E16_Sample1_peak_974	chr1	54881410	54882602	+	163	NA	intron (ENSMUST00000180327.7, intron 1 of 7)	protein_coding-intron (ENSMUST00000044359.15, intron 1 of 27)	2705	ENSMUST00000177679.1	ENSMUSG00000052331	ENSMUST00000178685			Ankrd44			protein_coding
Sox9_E16_Sample1_peak_976	chr1	54898708	54898990	+	51	NA	intron (ENSMUST00000180327.7, intron 1 of 7)	protein_coding-intron (ENSMUST00000044359.15, intron 1 of 27)	-14138	ENSMUST00000177679.1	ENSMUSG00000052331	ENSMUST00000178685			Ankrd44			protein_coding
Sox9_E16_Sample1_peak_977	chr1	54925575	54927081	+	1014	NA	promoter-TSS (ENSMUST00000044359.15)	protein_coding-promoter-TSS (ENSMUST00000044359.15)	26	ENSMUST00000178935.7	ENSMUSG00000052331	ENSMUST00000178685			Ankrd44			protein_coding
Sox9_E16_Sample1_peak_978	chr1	54982891	54983577	+	85	NA	Intergenic	Intergenic	7881	ENSMUST00000190175.1	ENSMUSG00000025982	ENSMUST00000187500			Sf3b1			protein_coding
Sox9_E16_Sample1_peak_979	chr1	55026589	55027823	+	434	NA	intron (ENSMUST00000191303.1, intron 1 of 6)	protein_coding-intron (ENSMUST00000027127.13, intron 1 of 24)	167	ENSMUST00000189051.1	ENSMUSG00000025982	ENSMUST00000187500			Sf3b1			protein_coding
Sox9_E16_Sample1_peak_980	chr1	55052253	55053425	+	1198	NA	promoter-TSS (ENSMUST00000027125.6)	protein_coding-promoter-TSS (ENSMUST00000027125.6)	-30	ENSMUST00000185474.1	ENSMUSG00000025981	ENSMUST00000087617			Coq10b			protein_coding
Sox9_E16_Sample1_peak_981	chr1	55076808	55077616	+	189	NA	TTS (ENSMUST00000027123.14)	protein_coding-TTS (ENSMUST00000027123.14)	10812	ENSMUST00000027123.14	ENSMUSG00000025980	ENSMUST00000144077			Hspd1			protein_coding
Sox9_E16_Sample1_peak_982	chr1	55087255	55088612	+	1035	NA	promoter-TSS (ENSMUST00000027123.14)	protein_coding-promoter-TSS (ENSMUST00000027123.14)	91	ENSMUST00000027123.14	ENSMUSG00000025980	ENSMUST00000144077			Hspd1			protein_coding
Sox9_E16_Sample1_peak_983	chr1	55131040	55131931	+	1360	NA	exon (ENSMUST00000162553.1, exon 1 of 8)	protein_coding-exon (ENSMUST00000162553.1, exon 1 of 8)	159	ENSMUST00000159743.1	ENSMUSG00000025979	ENSMUST00000162930			Mob4			protein_coding
Sox9_E16_Sample1_peak_984	chr1	55193263	55193650	+	28	NA	intron (ENSMUST00000027121.14, intron 7 of 8)	protein_coding-intron (ENSMUST00000027121.14, intron 7 of 8)	13033	ENSMUST00000133294.1	ENSMUSG00000025978	ENSMUST00000114428			Rftn2			protein_coding
Sox9_E16_Sample1_peak_985	chr1	55213037	55214120	+	179	NA	intron (ENSMUST00000114428.2, intron 2 of 5)	protein_coding-intron (ENSMUST00000027121.14, intron 2 of 8)	-7089	ENSMUST00000133294.1	ENSMUSG00000025978	ENSMUST00000114428			Rftn2			protein_coding
Sox9_E16_Sample1_peak_986	chr1	55221527	55222250	+	63	NA	intron (ENSMUST00000027121.14, intron 1 of 8)	protein_coding-intron (ENSMUST00000027121.14, intron 1 of 8)	-4363	ENSMUST00000181563.1	ENSMUSG00000097649	ENSMUST00000181563			Gm10561			lncRNA
Sox9_E16_Sample1_peak_988	chr1	55236826	55238015	+	643	NA	exon (ENSMUST00000061334.9, exon 1 of 1)	protein_coding-exon (ENSMUST00000061334.9, exon 1 of 1)	243	ENSMUST00000061334.9	ENSMUSG00000046994	ENSMUST00000061334			Mars2			protein_coding
Sox9_E16_Sample1_peak_990	chr1	55363101	55363993	+	455	NA	promoter-TSS (ENSMUST00000087585.9)	protein_coding-promoter-TSS (ENSMUST00000087585.9)	-78	ENSMUST00000159398.1	ENSMUSG00000025977	ENSMUST00000174065			Boll			protein_coding
Sox9_E16_Sample1_peak_991	chr1	55405349	55406872	+	810	NA	exon (ENSMUST00000042986.9, exon 1 of 6)	protein_coding-exon (ENSMUST00000042986.9, exon 1 of 6)	189	ENSMUST00000042986.9	ENSMUSG00000038349	ENSMUST00000187059			Plcl1			protein_coding
Sox9_E16_Sample1_peak_992	chr1	55417058	55417663	+	85	NA	intron (ENSMUST00000042986.9, intron 1 of 5)	protein_coding-intron (ENSMUST00000042986.9, intron 1 of 5)	11439	ENSMUST00000042986.9	ENSMUSG00000038349	ENSMUST00000187059			Plcl1			protein_coding
Sox9_E16_Sample1_peak_993	chr1	55436745	55437459	+	114	NA	intron (ENSMUST00000042986.9, intron 1 of 5)	protein_coding-intron (ENSMUST00000042986.9, intron 1 of 5)	-3802	ENSMUST00000193928.1	ENSMUSG00000102145	ENSMUST00000193928			Gm38056			TEC
Sox9_E16_Sample1_peak_994	chr1	55445565	55446687	+	125	NA	TTS (ENSMUST00000193928.1)	TEC-TTS (ENSMUST00000193928.1)	-1102	ENSMUST00000186507.1	ENSMUSG00000100309	ENSMUST00000186507			Gm6644			processed_pseudogene
Sox9_E16_Sample1_peak_996	chr1	55500635	55501143	+	39	NA	intron (ENSMUST00000042986.9, intron 1 of 5)	protein_coding-intron (ENSMUST00000042986.9, intron 1 of 5)	-55865	ENSMUST00000186507.1	ENSMUSG00000100309	ENSMUST00000186507			Gm6644			processed_pseudogene
Sox9_E16_Sample1_peak_998	chr1	55565694	55566652	+	379	NA	intron (ENSMUST00000042986.9, intron 1 of 5)	protein_coding-intron (ENSMUST00000042986.9, intron 1 of 5)	6713	ENSMUST00000193032.1	ENSMUSG00000102831	ENSMUST00000193032			Gm37382			TEC
Sox9_E16_Sample1_peak_999	chr1	55575871	55576546	+	130	NA	intron (ENSMUST00000042986.9, intron 1 of 5)	protein_coding-intron (ENSMUST00000042986.9, intron 1 of 5)	16748	ENSMUST00000193032.1	ENSMUSG00000102831	ENSMUST00000193032			Gm37382			TEC
Sox9_E16_Sample1_peak_1000	chr1	55668278	55668802	+	107	NA	intron (ENSMUST00000042986.9, intron 1 of 5)	protein_coding-intron (ENSMUST00000042986.9, intron 1 of 5)	-33485	ENSMUST00000187059.1	ENSMUSG00000038349	ENSMUST00000187059			Plcl1			protein_coding
Sox9_E16_Sample1_peak_1001	chr1	55874254	55874597	+	58	NA	Intergenic	Intergenic	-56816	ENSMUST00000189293.1	ENSMUSG00000099950	ENSMUST00000188040			9130227L01Rik			lncRNA
Sox9_E16_Sample1_peak_1002	chr1	55888086	55889575	+	215	NA	Intergenic	Intergenic	-42411	ENSMUST00000189293.1	ENSMUSG00000099950	ENSMUST00000188040			9130227L01Rik			lncRNA
Sox9_E16_Sample1_peak_1005	chr1	56811246	56812041	+	64	NA	intron (ENSMUST00000114415.9, intron 10 of 10)	protein_coding-intron (ENSMUST00000042857.13, intron 9 of 9)	158197	ENSMUST00000176759.1	ENSMUSG00000038331	ENSMUST00000176759			Satb2			protein_coding
Sox9_E16_Sample1_peak_1007	chr1	56896610	56897260	+	141	NA	intron (ENSMUST00000114415.9, intron 5 of 10)	protein_coding-intron (ENSMUST00000042857.13, intron 4 of 9)	72905	ENSMUST00000176759.1	ENSMUSG00000038331	ENSMUST00000176759			Satb2			protein_coding
Sox9_E16_Sample1_peak_1007-2	chr1	56897622	56898151	+	141	NA	intron (ENSMUST00000114415.9, intron 5 of 10)	protein_coding-intron (ENSMUST00000042857.13, intron 4 of 9)	71954	ENSMUST00000176759.1	ENSMUSG00000038331	ENSMUST00000176759			Satb2			protein_coding
Sox9_E16_Sample1_peak_1008	chr1	56926430	56927118	+	39	NA	intron (ENSMUST00000042857.13, intron 2 of 9)	protein_coding-intron (ENSMUST00000042857.13, intron 2 of 9)	43066	ENSMUST00000176759.1	ENSMUSG00000038331	ENSMUST00000176759			Satb2			protein_coding
Sox9_E16_Sample1_peak_1009	chr1	56971716	56973740	+	476	NA	promoter-TSS (ENSMUST00000042857.13)	protein_coding-promoter-TSS (ENSMUST00000042857.13)	-226	ENSMUST00000042857.13	ENSMUSG00000038331	ENSMUST00000176759			Satb2			protein_coding
Sox9_E16_Sample1_peak_1011	chr1	57077622	57078888	+	78	NA	Intergenic	Intergenic	37862	ENSMUST00000187858.1	ENSMUSG00000087022	ENSMUST00000135238			9130024F11Rik			lncRNA
Sox9_E16_Sample1_peak_1012	chr1	57205142	57206072	+	207	NA	intron (ENSMUST00000190488.1, intron 5 of 6)	lncRNA-intron (ENSMUST00000190488.1, intron 5 of 6)	9386	ENSMUST00000190488.1	ENSMUSG00000101429	ENSMUST00000190488			BC055402			lncRNA
Sox9_E16_Sample1_peak_1013	chr1	57266929	57267781	+	127	NA	Intergenic	Intergenic	25046	ENSMUST00000188353.1	ENSMUSG00000101129	ENSMUST00000188353			Gm5254			processed_pseudogene
Sox9_E16_Sample1_peak_1014	chr1	57333728	57334115	+	39	NA	Intergenic	Intergenic	-41520	ENSMUST00000188353.1	ENSMUSG00000101129	ENSMUST00000188353			Gm5254			processed_pseudogene
Sox9_E16_Sample1_peak_1015	chr1	57377151	57378300	+	965	NA	promoter-TSS (ENSMUST00000181949.2)	lncRNA-promoter-TSS (ENSMUST00000181949.2)	85	ENSMUST00000187255.1	ENSMUSG00000038323	ENSMUST00000187255			1700066M21Rik			protein_coding
Sox9_E16_Sample1_peak_1016	chr1	57406046	57407242	+	576	NA	promoter-TSS (ENSMUST00000079998.12)	protein_coding-promoter-TSS (ENSMUST00000079998.12)	30	ENSMUST00000079998.12	ENSMUSG00000048495	ENSMUST00000161780			Tyw5			protein_coding
Sox9_E16_Sample1_peak_1017	chr1	57429133	57429514	+	28	NA	Intergenic	Intergenic	-6950	ENSMUST00000104588.1	ENSMUSG00000077776	ENSMUST00000104588			Gm22371			snoRNA
Sox9_E16_Sample1_peak_1018	chr1	57605793	57606153	+	51	NA	Intergenic	Intergenic	-41922	ENSMUST00000186851.1	ENSMUSG00000101151	ENSMUST00000186851			Gm17929			processed_pseudogene
Sox9_E16_Sample1_peak_1019	chr1	57613139	57613621	+	85	NA	Intergenic	Intergenic	-49329	ENSMUST00000186851.1	ENSMUSG00000101151	ENSMUST00000186851			Gm17929			processed_pseudogene
Sox9_E16_Sample1_peak_1020	chr1	57716889	57717731	+	196	NA	Intergenic	Intergenic	-56852	ENSMUST00000172287.7	ENSMUSG00000038305	ENSMUST00000167085			Spats2l			protein_coding
Sox9_E16_Sample1_peak_1021	chr1	57774043	57775756	+	731	NA	promoter-TSS (ENSMUST00000165235.1)	protein_coding-promoter-TSS (ENSMUST00000165235.1)	9	ENSMUST00000168016.7	ENSMUSG00000038305	ENSMUST00000167085			Spats2l			protein_coding
Sox9_E16_Sample1_peak_1022	chr1	57847801	57848337	+	22	NA	intron (ENSMUST00000169772.2, intron 1 of 11)	protein_coding-intron (ENSMUST00000163239.7, intron 2 of 11)	2498	ENSMUST00000169772.2	ENSMUSG00000038305	ENSMUST00000167085			Spats2l			protein_coding
Sox9_E16_Sample1_peak_1024	chr1	57947454	57948911	+	318	NA	exon (ENSMUST00000167085.7, exon 14 of 14)	protein_coding-exon (ENSMUST00000167085.7, exon 14 of 14)	13920	ENSMUST00000163006.1	ENSMUSG00000054770	ENSMUST00000160130			Kctd18			protein_coding
Sox9_E16_Sample1_peak_1025	chr1	57969389	57970381	+	684	NA	promoter-TSS (ENSMUST00000161608.7)	protein_coding-promoter-TSS (ENSMUST00000161608.7)	163	ENSMUST00000159826.1	ENSMUSG00000054770	ENSMUST00000160130			Kctd18			protein_coding
Sox9_E16_Sample1_peak_1026	chr1	57995652	57996627	+	395	NA	exon (ENSMUST00000027202.8, exon 1 of 9)	protein_coding-exon (ENSMUST00000027202.8, exon 1 of 9)	168	ENSMUST00000027202.8	ENSMUSG00000026039	ENSMUST00000190746			Sgo2a			protein_coding
Sox9_E16_Sample1_peak_1027	chr1	58029434	58030659	+	339	NA	promoter-TSS (ENSMUST00000160168.1)	protein_coding-promoter-TSS (ENSMUST00000160168.1)	82	ENSMUST00000160168.1	ENSMUSG00000063558	ENSMUST00000001027			Aox1			protein_coding
Sox9_E16_Sample1_peak_1029	chr1	58072723	58073379	+	71	NA	intron (ENSMUST00000001027.6, intron 19 of 34)	protein_coding-intron (ENSMUST00000001027.6, intron 19 of 34)	-40079	ENSMUST00000161549.1	ENSMUSG00000064294	ENSMUST00000161549			Aox3			protein_coding
Sox9_E16_Sample1_peak_1030	chr1	58112514	58113021	+	28	NA	promoter-TSS (ENSMUST00000040999.13)	protein_coding-promoter-TSS (ENSMUST00000040999.13)	-363	ENSMUST00000161549.1	ENSMUSG00000064294	ENSMUST00000161549			Aox3			protein_coding
Sox9_E16_Sample1_peak_1034	chr1	58392233	58394019	+	415	NA	promoter-TSS (ENSMUST00000186949.1)	protein_coding-promoter-TSS (ENSMUST00000186949.1)	2	ENSMUST00000188898.6	ENSMUSG00000051223	ENSMUST00000188898			Bzw1			protein_coding
Sox9_E16_Sample1_peak_1035	chr1	58409896	58410193	+	23	NA	TTS (ENSMUST00000156931.7)	protein_coding-TTS (ENSMUST00000156931.7)	2817	ENSMUST00000139787.7	ENSMUSG00000026034	ENSMUST00000156931			Clk1			protein_coding
Sox9_E16_Sample1_peak_1036	chr1	58423079	58424337	+	233	NA	intron (ENSMUST00000156931.7, intron 1 of 10)	protein_coding-intron (ENSMUST00000034868.13, intron 1 of 12)	358	ENSMUST00000148330.7	ENSMUSG00000026034	ENSMUST00000156931			Clk1			protein_coding
Sox9_E16_Sample1_peak_1037	chr1	58444884	58445986	+	862	NA	promoter-TSS (ENSMUST00000081677.11)	protein_coding-promoter-TSS (ENSMUST00000081677.11)	-1	ENSMUST00000114348.7	ENSMUSG00000026035	ENSMUST00000188896			Ppil3			protein_coding
Sox9_E16_Sample1_peak_1038	chr1	58504334	58505373	+	632	NA	promoter-TSS (ENSMUST00000129740.2)	lncRNA-promoter-TSS (ENSMUST00000129740.2)	72	ENSMUST00000190695.1	ENSMUSG00000026037	ENSMUST00000191206			Orc2			protein_coding
Sox9_E16_Sample1_peak_1039	chr1	58585804	58586834	+	420	NA	promoter-TSS (ENSMUST00000027193.8)	protein_coding-promoter-TSS (ENSMUST00000027193.8)	4	ENSMUST00000161600.7	ENSMUSG00000038174	ENSMUST00000097724			Fam126b			protein_coding
Sox9_E16_Sample1_peak_1040	chr1	58652226	58653181	+	323	NA	promoter-TSS (ENSMUST00000185352.1)	transcribed_unprocessed_pseudogene-promoter-TSS (ENSMUST00000185352.1)	62	ENSMUST00000185352.1	ENSMUSG00000102059	ENSMUST00000188643			Gm20257			transcribed_unprocessed_pseudogene
Sox9_E16_Sample1_peak_1041	chr1	58711182	58712657	+	401	NA	intron (ENSMUST00000114313.7, intron 1 of 9)	protein_coding-intron (ENSMUST00000156870.1, intron 1 of 2)	359	ENSMUST00000114313.7	ENSMUSG00000026031	ENSMUST00000123032			Cflar			protein_coding
Sox9_E16_Sample1_peak_1042	chr1	58795043	58796391	+	706	NA	exon (ENSMUST00000027189.14, exon 1 of 9)	protein_coding-exon (ENSMUST00000027189.14, exon 1 of 9)	240	ENSMUST00000191201.6	ENSMUSG00000026029	ENSMUST00000191201			Casp8			protein_coding
Sox9_E16_Sample1_peak_1043	chr1	58859151	58860320	+	384	NA	intron (ENSMUST00000188624.1, intron 8 of 11)	unprocessed_pseudogene-intron (ENSMUST00000188624.1, intron 8 of 11)	33057	ENSMUST00000188624.1	ENSMUSG00000099719	ENSMUST00000188624			Gm28802			unprocessed_pseudogene
Sox9_E16_Sample1_peak_1044	chr1	58950903	58951830	+	163	NA	intron (ENSMUST00000173719.1, intron 1 of 1)	protein_coding-intron (ENSMUST00000027186.11, intron 1 of 15)	-5029	ENSMUST00000174120.1	ENSMUSG00000026028	ENSMUST00000173590			Trak2			protein_coding
Sox9_E16_Sample1_peak_1045	chr1	58973112	58974207	+	870	NA	promoter-TSS (ENSMUST00000027186.11)	protein_coding-promoter-TSS (ENSMUST00000027186.11)	137	ENSMUST00000147637.7	ENSMUSG00000026027	ENSMUST00000147637			Stradb			protein_coding
Sox9_E16_Sample1_peak_1046	chr1	59119618	59120471	+	540	NA	promoter-TSS (ENSMUST00000087475.10)	protein_coding-promoter-TSS (ENSMUST00000087475.10)	50	ENSMUST00000094917.9	ENSMUSG00000038079	ENSMUST00000186794			Tmem237			protein_coding
Sox9_E16_Sample1_peak_1047	chr1	59134169	59134933	+	356	NA	intron (ENSMUST00000066374.13, intron 13 of 21)	protein_coding-intron (ENSMUST00000066374.13, intron 13 of 21)	11251	ENSMUST00000187825.6	ENSMUSG00000079550	ENSMUST00000114275			Mpp4			protein_coding
Sox9_E16_Sample1_peak_1048	chr1	59236806	59238181	+	456	NA	promoter-TSS (ENSMUST00000027178.12)	protein_coding-promoter-TSS (ENSMUST00000027178.12)	-262	ENSMUST00000027178.12	ENSMUSG00000026024	ENSMUST00000160945			Als2			protein_coding
Sox9_E16_Sample1_peak_1049	chr1	59252993	59253713	+	34	NA	Intergenic	Intergenic	-3553	ENSMUST00000160662.7	ENSMUSG00000026023	ENSMUST00000114248			Cdk15			protein_coding
Sox9_E16_Sample1_peak_1050	chr1	59321419	59322120	+	114	NA	intron (ENSMUST00000162906.1, intron 3 of 4)	protein_coding-intron (ENSMUST00000114248.2, intron 10 of 13)	22833	ENSMUST00000162906.1	ENSMUSG00000026023	ENSMUST00000114248			Cdk15			protein_coding
Sox9_E16_Sample1_peak_1051	chr1	59448933	59449747	+	58	NA	exon (ENSMUST00000195013.1, exon 1 of 1)	TEC-exon (ENSMUST00000195013.1, exon 1 of 1)	162	ENSMUST00000195013.1	ENSMUSG00000104502	ENSMUST00000195013			Gm37737			TEC
Sox9_E16_Sample1_peak_1053	chr1	59472581	59473746	+	107	NA	Intergenic	Intergenic	-9261	ENSMUST00000114246.3	ENSMUSG00000041075	ENSMUST00000114246			Fzd7			protein_coding
Sox9_E16_Sample1_peak_1054	chr1	59481291	59482947	+	448	NA	promoter-TSS (ENSMUST00000114246.3)	protein_coding-promoter-TSS (ENSMUST00000114246.3)	-305	ENSMUST00000114246.3	ENSMUSG00000041075	ENSMUST00000114246			Fzd7			protein_coding
Sox9_E16_Sample1_peak_1055	chr1	59491395	59491969	+	58	NA	exon (ENSMUST00000180778.1, exon 2 of 2)	lncRNA-exon (ENSMUST00000180778.1, exon 2 of 2)	923	ENSMUST00000180778.1	ENSMUSG00000097819	ENSMUST00000180778			Gm26813			lncRNA
Sox9_E16_Sample1_peak_1056	chr1	59497541	59498749	+	349	NA	Intergenic	Intergenic	-5540	ENSMUST00000180778.1	ENSMUSG00000097819	ENSMUST00000180778			Gm26813			lncRNA
Sox9_E16_Sample1_peak_1057	chr1	59516067	59517158	+	272	NA	intron (ENSMUST00000114243.7, intron 1 of 19)	protein_coding-intron (ENSMUST00000114243.7, intron 1 of 19)	348	ENSMUST00000114243.7	ENSMUSG00000047361	ENSMUST00000187454			Gm973			protein_coding
Sox9_E16_Sample1_peak_1060	chr1	59579424	59580743	+	127	NA	intron (ENSMUST00000114243.7, intron 11 of 19)	protein_coding-intron (ENSMUST00000114243.7, intron 11 of 19)	-2313	ENSMUST00000212835.1	ENSMUSG00000047361	ENSMUST00000187454			Gm973			protein_coding
Sox9_E16_Sample1_peak_1061	chr1	59670122	59671142	+	288	NA	intron (ENSMUST00000091374.8, intron 1 of 4)	protein_coding-intron (ENSMUST00000091374.8, intron 1 of 4)	107	ENSMUST00000185265.1	ENSMUSG00000026021	ENSMUST00000123857			Sumo1			protein_coding
Sox9_E16_Sample1_peak_1062	chr1	59684809	59685683	+	286	NA	intron (ENSMUST00000189327.6, intron 1 of 5)	protein_coding-intron (ENSMUST00000027174.9, intron 1 of 12)	192	ENSMUST00000189327.6	ENSMUSG00000026020	ENSMUST00000187491			Nop58			protein_coding
Sox9_E16_Sample1_peak_1063	chr1	59762471	59764744	+	547	NA	exon (ENSMUST00000087435.6, exon 1 of 13)	protein_coding-exon (ENSMUST00000087435.6, exon 1 of 13)	207	ENSMUST00000087435.6	ENSMUSG00000067336	ENSMUST00000190659			Bmpr2			protein_coding
Sox9_E16_Sample1_peak_1064	chr1	59883367	59883907	+	23	NA	Intergenic	Intergenic	4052	ENSMUST00000193096.1	ENSMUSG00000103131	ENSMUST00000193096			Gm37977			TEC
Sox9_E16_Sample1_peak_1065	chr1	59895205	59896089	+	155	NA	Intergenic	Intergenic	-7958	ENSMUST00000193096.1	ENSMUSG00000103131	ENSMUST00000193096			Gm37977			TEC
Sox9_E16_Sample1_peak_1066	chr1	59912568	59914034	+	636	NA	exon (ENSMUST00000036540.11, exon 1 of 8)	protein_coding-exon (ENSMUST00000036540.11, exon 1 of 8)	295	ENSMUST00000036540.11	ENSMUSG00000041040	ENSMUST00000189790			Fam117b			protein_coding
Sox9_E16_Sample1_peak_1067	chr1	60042597	60043392	+	252	NA	promoter-TSS (ENSMUST00000027172.12)	protein_coding-promoter-TSS (ENSMUST00000027172.12)	93	ENSMUST00000027172.12	ENSMUSG00000026018	ENSMUST00000191251			Ica1l			protein_coding
Sox9_E16_Sample1_peak_1068	chr1	60097456	60098748	+	424	NA	promoter-TSS (ENSMUST00000027173.14)	protein_coding-promoter-TSS (ENSMUST00000027173.14)	23	ENSMUST00000143342.7	ENSMUSG00000026019	ENSMUST00000136461			Wdr12			protein_coding
Sox9_E16_Sample1_peak_1069	chr1	60179727	60181163	+	1054	NA	promoter-TSS (ENSMUST00000160834.7)	protein_coding-promoter-TSS (ENSMUST00000160834.7)	-154	ENSMUST00000160834.7	ENSMUSG00000073664	ENSMUST00000159344			Nbeal1			protein_coding
Sox9_E16_Sample1_peak_1070	chr1	60342881	60343989	+	1012	NA	exon (ENSMUST00000060608.12, exon 1 of 13)	protein_coding-exon (ENSMUST00000060608.12, exon 1 of 13)	112	ENSMUST00000114202.7	ENSMUSG00000049439	ENSMUST00000060608			Cyp20a1			protein_coding
Sox9_E16_Sample1_peak_1071	chr1	60409016	60410458	+	494	NA	promoter-TSS (ENSMUST00000187709.6)	protein_coding-promoter-TSS (ENSMUST00000187709.6)	3	ENSMUST00000189980.6	ENSMUSG00000026782	ENSMUST00000189649			Abi2			protein_coding
Sox9_E16_Sample1_peak_1072	chr1	60565461	60567467	+	617	NA	intron (ENSMUST00000142258.2, intron 1 of 3)	protein_coding-intron (ENSMUST00000027168.11, intron 1 of 15)	301	ENSMUST00000027168.11	ENSMUSG00000026014	ENSMUST00000189383			Raph1			protein_coding
Sox9_E16_Sample1_peak_1073	chr1	60596125	60597156	+	114	NA	promoter-TSS (ENSMUST00000195569.1)	TEC-promoter-TSS (ENSMUST00000195569.1)	-404	ENSMUST00000195569.1	ENSMUSG00000103215	ENSMUST00000195569			Gm38388			TEC
Sox9_E16_Sample1_peak_1074	chr1	60609124	60609955	+	395	NA	Intergenic	Intergenic	4264	ENSMUST00000158348.1	ENSMUSG00000088973	ENSMUST00000158348			Gm23762			miRNA
Sox9_E16_Sample1_peak_1075	chr1	61136094	61136642	+	147	NA	Intergenic	Intergenic	-12364	ENSMUST00000118999.1	ENSMUSG00000082661	ENSMUST00000118999			Gm11590			processed_pseudogene
Sox9_E16_Sample1_peak_1076	chr1	61181246	61181935	+	155	NA	Intergenic	Intergenic	15652	ENSMUST00000120063.1	ENSMUSG00000080785	ENSMUST00000120063			Gm11591			processed_pseudogene
Sox9_E16_Sample1_peak_1078	chr1	61336339	61336719	+	71	NA	Intergenic	Intergenic	34620	ENSMUST00000128274.2	ENSMUSG00000085248	ENSMUST00000128274			Gm11587			lncRNA
Sox9_E16_Sample1_peak_1080	chr1	61638383	61639894	+	593	NA	promoter-TSS (ENSMUST00000046673.10)	protein_coding-promoter-TSS (ENSMUST00000046673.10)	-105	ENSMUST00000046673.10	ENSMUSG00000052062	ENSMUST00000075374			Pard3b			protein_coding
Sox9_E16_Sample1_peak_1081	chr1	61779871	61780300	+	58	NA	intron (ENSMUST00000138535.7, intron 3 of 4)	protein_coding-intron (ENSMUST00000046673.10, intron 2 of 21)	-25136	ENSMUST00000191979.1	ENSMUSG00000103002	ENSMUST00000191979			Gm38075			TEC
Sox9_E16_Sample1_peak_1083	chr1	61927774	61928163	+	28	NA	intron (ENSMUST00000046673.10, intron 2 of 21)	protein_coding-intron (ENSMUST00000046673.10, intron 2 of 21)	53239	ENSMUST00000187972.1	ENSMUSG00000100344	ENSMUST00000187972			Gm29640			processed_pseudogene
Sox9_E16_Sample1_peak_1086	chr1	62070689	62071242	+	51	NA	intron (ENSMUST00000094906.3, intron 3 of 21)	protein_coding-intron (ENSMUST00000046673.10, intron 3 of 21)	24374	ENSMUST00000188955.1	ENSMUSG00000101509	ENSMUST00000188955			Gm29641			processed_pseudogene
Sox9_E16_Sample1_peak_1088	chr1	62175173	62175520	+	64	NA	intron (ENSMUST00000046673.10, intron 10 of 21)	protein_coding-intron (ENSMUST00000046673.10, intron 10 of 21)	-39237	ENSMUST00000127498.2	ENSMUSG00000085019	ENSMUST00000127498			Pard3bos2			lncRNA
Sox9_E16_Sample1_peak_1089	chr1	62579165	62580935	+	157	NA	intron (ENSMUST00000046673.10, intron 20 of 21)	protein_coding-intron (ENSMUST00000046673.10, intron 20 of 21)	-44108	ENSMUST00000185587.1	ENSMUSG00000100750	ENSMUST00000185587			Gm29084			lncRNA
Sox9_E16_Sample1_peak_1091	chr1	62625575	62626772	+	248	NA	intron (ENSMUST00000094906.3, intron 21 of 21)	protein_coding-intron (ENSMUST00000046673.10, intron 21 of 21)	31615	ENSMUST00000119592.1	ENSMUSG00000081950	ENSMUST00000119592			Gm11600			processed_pseudogene
Sox9_E16_Sample1_peak_1092	chr1	62702960	62703608	+	110	NA	promoter-TSS (ENSMUST00000027112.12)	protein_coding-promoter-TSS (ENSMUST00000027112.12)	-1	ENSMUST00000102822.8	ENSMUSG00000025969	ENSMUST00000027112			Nrp2			protein_coding
Sox9_E16_Sample1_peak_1093	chr1	62704769	62705301	+	127	NA	intron (ENSMUST00000126344.1, intron 1 of 2)	protein_coding-intron (ENSMUST00000027112.12, intron 1 of 15)	1333	ENSMUST00000063594.12	ENSMUSG00000025969	ENSMUST00000027112			Nrp2			protein_coding
Sox9_E16_Sample1_peak_1094	chr1	62706419	62707265	+	194	NA	intron (ENSMUST00000126344.1, intron 1 of 2)	protein_coding-intron (ENSMUST00000027112.12, intron 1 of 15)	3140	ENSMUST00000063594.12	ENSMUSG00000025969	ENSMUST00000027112			Nrp2			protein_coding
Sox9_E16_Sample1_peak_1095	chr1	62794673	62796486	+	228	NA	intron (ENSMUST00000075144.11, intron 15 of 15)	protein_coding-intron (ENSMUST00000027112.12, intron 15 of 15)	-13723	ENSMUST00000192219.1	ENSMUSG00000103032	ENSMUST00000192219			Gm37121			TEC
Sox9_E16_Sample1_peak_1096	chr1	62813183	62814339	+	331	NA	intron (ENSMUST00000114157.2, intron 16 of 16)	protein_coding-intron (ENSMUST00000063594.12, intron 16 of 16)	4459	ENSMUST00000192219.1	ENSMUSG00000103032	ENSMUST00000192219			Gm37121			TEC
Sox9_E16_Sample1_peak_1097	chr1	62843271	62843737	+	99	NA	Intergenic	Intergenic	-11134	ENSMUST00000189802.1	ENSMUSG00000100426	ENSMUST00000189802			Gm4208			lncRNA
Sox9_E16_Sample1_peak_1098	chr1	62859024	62859290	+	51	NA	Intergenic	Intergenic	-26787	ENSMUST00000189802.1	ENSMUSG00000100426	ENSMUST00000189802			Gm4208			lncRNA
Sox9_E16_Sample1_peak_1099	chr1	62934156	62934666	+	85	NA	Intergenic	Intergenic	-91331	ENSMUST00000199516.1	ENSMUSG00000104991	ENSMUST00000199516			Gm44468			miRNA
Sox9_E16_Sample1_peak_1100	chr1	62942169	62942817	+	130	NA	Intergenic	Intergenic	-83249	ENSMUST00000199516.1	ENSMUSG00000104991	ENSMUST00000199516			Gm44468			miRNA
Sox9_E16_Sample1_peak_1101	chr1	62947442	62948411	+	547	NA	Intergenic	Intergenic	-77816	ENSMUST00000199516.1	ENSMUSG00000104991	ENSMUST00000199516			Gm44468			miRNA
Sox9_E16_Sample1_peak_1102	chr1	62964232	62964757	+	58	NA	intron (ENSMUST00000133236.7, intron 11 of 12)	protein_coding-intron (ENSMUST00000133236.7, intron 11 of 12)	-61248	ENSMUST00000199516.1	ENSMUSG00000104991	ENSMUST00000199516			Gm44468			miRNA
Sox9_E16_Sample1_peak_1105	chr1	63004712	63005742	+	189	NA	intron (ENSMUST00000133236.7, intron 9 of 12)	protein_coding-intron (ENSMUST00000133236.7, intron 9 of 12)	-20515	ENSMUST00000199516.1	ENSMUSG00000104991	ENSMUST00000199516			Gm44468			miRNA
Sox9_E16_Sample1_peak_1106	chr1	63112977	63114961	+	334	NA	promoter-TSS (ENSMUST00000138611.7)	lncRNA-promoter-TSS (ENSMUST00000138611.7)	-127	ENSMUST00000186786.1	ENSMUSG00000084799	ENSMUST00000138611			Ino80dos			lncRNA
Sox9_E16_Sample1_peak_1107	chr1	63129776	63130512	+	162	NA	intron (ENSMUST00000188602.1, intron 1 of 3)	lncRNA-intron (ENSMUST00000138611.7, intron 1 of 3)	13026	ENSMUST00000185480.1	ENSMUSG00000101599	ENSMUST00000185480			Gm20342			lncRNA
Sox9_E16_Sample1_peak_1108	chr1	63176307	63177385	+	499	NA	promoter-TSS (ENSMUST00000027108.12)	protein_coding-promoter-TSS (ENSMUST00000027108.12)	-13	ENSMUST00000189664.1	ENSMUSG00000025968	ENSMUST00000185847			Ndufs1			protein_coding
Sox9_E16_Sample1_peak_1109	chr1	63214034	63214528	+	34	NA	promoter-TSS (ENSMUST00000187533.1)	protein_coding-promoter-TSS (ENSMUST00000187533.1)	-58	ENSMUST00000187533.1	ENSMUSG00000046856	ENSMUST00000187533			Gpr1			protein_coding
Sox9_E16_Sample1_peak_1110	chr1	63247511	63248545	+	71	NA	TTS (ENSMUST00000194370.1)	TEC-TTS (ENSMUST00000194370.1)	471	ENSMUST00000194370.1	ENSMUSG00000102536	ENSMUST00000194370			1700039I01Rik			TEC
Sox9_E16_Sample1_peak_1111	chr1	63272774	63274360	+	276	NA	promoter-TSS (ENSMUST00000151616.1)	lncRNA-promoter-TSS (ENSMUST00000151616.1)	-204	ENSMUST00000174964.1	ENSMUSG00000092705	ENSMUST00000174964			Gm24513			miRNA
Sox9_E16_Sample1_peak_1112	chr1	63445924	63446625	+	210	NA	promoter-TSS (ENSMUST00000114103.7)	protein_coding-promoter-TSS (ENSMUST00000114103.7)	63	ENSMUST00000114103.7	ENSMUSG00000025964	ENSMUST00000134704			Adam23			protein_coding
Sox9_E16_Sample1_peak_1113	chr1	63705627	63706342	+	130	NA	intron (ENSMUST00000114094.2, intron 9 of 10)	protein_coding-intron (ENSMUST00000114094.2, intron 9 of 10)	-19057	ENSMUST00000090313.4	ENSMUSG00000069085	ENSMUST00000090313			Dytn			protein_coding
Sox9_E16_Sample1_peak_1114	chr1	63730126	63731211	+	878	NA	promoter-TSS (ENSMUST00000027103.6)	protein_coding-promoter-TSS (ENSMUST00000027103.6)	25	ENSMUST00000128621.7	ENSMUSG00000025962	ENSMUST00000027103			Fastkd2			protein_coding
Sox9_E16_Sample1_peak_1115	chr1	63857620	63858578	+	207	NA	Intergenic	Intergenic	-12521	ENSMUST00000120280.1	ENSMUSG00000080817	ENSMUST00000120280			Gm13751			processed_pseudogene
Sox9_E16_Sample1_peak_1116	chr1	63953362	63953961	+	71	NA	Intergenic	Intergenic	-11066	ENSMUST00000133244.1	ENSMUSG00000044689	ENSMUST00000133244			Gm13749			lncRNA
Sox9_E16_Sample1_peak_1118	chr1	64018733	64019499	+	124	NA	Intergenic	Intergenic	23385	ENSMUST00000184798.1	ENSMUSG00000098487	ENSMUST00000184798			Mir6899			miRNA
Sox9_E16_Sample1_peak_1119	chr1	64038254	64038740	+	92	NA	intron (ENSMUST00000114086.7, intron 3 of 3)	protein_coding-intron (ENSMUST00000114086.7, intron 3 of 3)	4004	ENSMUST00000184798.1	ENSMUSG00000098487	ENSMUST00000184798			Mir6899			miRNA
Sox9_E16_Sample1_peak_1121	chr1	64088003	64088832	+	64	NA	intron (ENSMUST00000149820.1, intron 3 of 3)	protein_coding-intron (ENSMUST00000055001.9, intron 2 of 3)	9763	ENSMUST00000149820.1	ENSMUSG00000086836	ENSMUST00000149820			Gm13748			lncRNA
Sox9_E16_Sample1_peak_1122	chr1	64105691	64107103	+	207	NA	intron (ENSMUST00000114086.7, intron 1 of 3)	protein_coding-intron (ENSMUST00000055001.9, intron 2 of 3)	15085	ENSMUST00000055001.9	ENSMUSG00000025959	ENSMUST00000135075			Klf7			protein_coding
Sox9_E16_Sample1_peak_1123	chr1	64120881	64122619	+	1572	NA	promoter-TSS (ENSMUST00000055001.9)	protein_coding-promoter-TSS (ENSMUST00000055001.9)	-259	ENSMUST00000114086.7	ENSMUSG00000025959	ENSMUST00000135075			Klf7			protein_coding
Sox9_E16_Sample1_peak_1124	chr1	64225923	64226895	+	405	NA	intron (ENSMUST00000190863.1, intron 1 of 1)	lncRNA-intron (ENSMUST00000190863.1, intron 1 of 1)	76208	ENSMUST00000117621.1	ENSMUSG00000086721	ENSMUST00000117621			Gm13750			processed_pseudogene
Sox9_E16_Sample1_peak_1125	chr1	64301520	64303037	+	191	NA	intron (ENSMUST00000190863.1, intron 1 of 1)	lncRNA-intron (ENSMUST00000190863.1, intron 1 of 1)	765	ENSMUST00000190863.1	ENSMUSG00000101895	ENSMUST00000190863			Gm28981			lncRNA
Sox9_E16_Sample1_peak_1126	chr1	64446293	64446476	+	34	NA	Intergenic	Intergenic	8193	ENSMUST00000187877.1	ENSMUSG00000099658	ENSMUST00000187877			Gm28980			processed_pseudogene
Sox9_E16_Sample1_peak_1127	chr1	64531992	64533273	+	1315	NA	promoter-TSS (ENSMUST00000049932.11)	protein_coding-promoter-TSS (ENSMUST00000049932.11)	-13	ENSMUST00000185594.6	ENSMUSG00000025958	ENSMUST00000049932			Creb1			protein_coding
Sox9_E16_Sample1_peak_1128	chr1	64600348	64600797	+	28	NA	exon (ENSMUST00000049932.11, exon 9 of 9)	protein_coding-exon (ENSMUST00000049932.11, exon 9 of 9)	15059	ENSMUST00000162806.7	ENSMUSG00000025956	ENSMUST00000053469			Mettl21a			protein_coding
Sox9_E16_Sample1_peak_1129	chr1	64616733	64618090	+	1060	NA	promoter-TSS (ENSMUST00000053469.1)	protein_coding-promoter-TSS (ENSMUST00000053469.1)	-169	ENSMUST00000114079.8	ENSMUSG00000025956	ENSMUST00000053469			Mettl21a			protein_coding
Sox9_E16_Sample1_peak_1130	chr1	64690123	64691691	+	669	NA	promoter-TSS (ENSMUST00000094898.4)	protein_coding-promoter-TSS (ENSMUST00000094898.4)	85	ENSMUST00000187170.6	ENSMUSG00000070871	ENSMUST00000094898			Ccnyl1			protein_coding
Sox9_E16_Sample1_peak_1131	chr1	64736602	64738784	+	1193	NA	promoter-TSS (ENSMUST00000063982.6)	protein_coding-promoter-TSS (ENSMUST00000063982.6)	56	ENSMUST00000116133.3	ENSMUSG00000045005	ENSMUST00000116133			Fzd5			protein_coding
Sox9_E16_Sample1_peak_1132	chr1	64756293	64757712	+	228	NA	Intergenic	Intergenic	-19251	ENSMUST00000063982.6	ENSMUSG00000045005	ENSMUST00000116133			Fzd5			protein_coding
Sox9_E16_Sample1_peak_1133	chr1	64772809	64774068	+	283	NA	Intergenic	Intergenic	-35687	ENSMUST00000063982.6	ENSMUSG00000045005	ENSMUST00000116133			Fzd5			protein_coding
Sox9_E16_Sample1_peak_1134	chr1	64787670	64788607	+	116	NA	TTS (ENSMUST00000097713.1)	protein_coding-TTS (ENSMUST00000097713.1)	48626	ENSMUST00000187188.1	ENSMUSG00000051344	ENSMUST00000097713			Plekhm3			protein_coding
Sox9_E16_Sample1_peak_1135	chr1	64808764	64810005	+	866	NA	intron (ENSMUST00000187188.1, intron 2 of 2)	protein_coding-intron (ENSMUST00000097713.1, intron 7 of 7)	27380	ENSMUST00000187188.1	ENSMUSG00000051344	ENSMUST00000097713			Plekhm3			protein_coding
Sox9_E16_Sample1_peak_1138	chr1	64859673	64860880	+	107	NA	TTS (ENSMUST00000140857.1)	protein_coding-TTS (ENSMUST00000140857.1)	-23512	ENSMUST00000187188.1	ENSMUSG00000051344	ENSMUST00000097713			Plekhm3			protein_coding
Sox9_E16_Sample1_peak_1139	chr1	64887588	64888224	+	198	NA	intron (ENSMUST00000140857.1, intron 3 of 4)	protein_coding-intron (ENSMUST00000097713.1, intron 4 of 7)	40191	ENSMUST00000140857.1	ENSMUSG00000051344	ENSMUST00000097713			Plekhm3			protein_coding
Sox9_E16_Sample1_peak_1140	chr1	64918836	64919322	+	114	NA	intron (ENSMUST00000140857.1, intron 2 of 4)	protein_coding-intron (ENSMUST00000097713.1, intron 3 of 7)	9018	ENSMUST00000140857.1	ENSMUSG00000051344	ENSMUST00000097713			Plekhm3			protein_coding
Sox9_E16_Sample1_peak_1141	chr1	64949206	64950056	+	226	NA	intron (ENSMUST00000097713.1, intron 1 of 7)	protein_coding-intron (ENSMUST00000097713.1, intron 1 of 7)	7096	ENSMUST00000134097.1	ENSMUSG00000051344	ENSMUST00000097713			Plekhm3			protein_coding
Sox9_E16_Sample1_peak_1142	chr1	64956094	64957239	+	274	NA	promoter-TSS (ENSMUST00000134097.1)	protein_coding-promoter-TSS (ENSMUST00000134097.1)	61	ENSMUST00000134097.1	ENSMUSG00000051344	ENSMUST00000097713			Plekhm3			protein_coding
Sox9_E16_Sample1_peak_1144	chr1	65112159	65113155	+	256	NA	intron (ENSMUST00000148020.7, intron 5 of 7)	protein_coding-intron (ENSMUST00000050047.3, intron 5 of 7)	6901	ENSMUST00000144760.2	ENSMUSG00000100846	ENSMUST00000144760			Gm28845			protein_coding
Sox9_E16_Sample1_peak_1145	chr1	65178025	65180036	+	1358	NA	exon (ENSMUST00000097709.10, exon 1 of 9)	protein_coding-exon (ENSMUST00000097709.10, exon 1 of 9)	151	ENSMUST00000097709.10	ENSMUSG00000025950	ENSMUST00000149310			Idh1			protein_coding
Sox9_E16_Sample1_peak_1146	chr1	65186102	65187323	+	799	NA	promoter-TSS (ENSMUST00000081154.13)	protein_coding-promoter-TSS (ENSMUST00000081154.13)	-1	ENSMUST00000185263.6	ENSMUSG00000025949	ENSMUST00000213081			Pikfyve			protein_coding
Sox9_E16_Sample1_peak_1149	chr1	65282678	65283199	+	58	NA	intron (ENSMUST00000140190.7, intron 1 of 5)	protein_coding-intron (ENSMUST00000140190.7, intron 1 of 5)	882	ENSMUST00000140190.7	ENSMUSG00000025946	ENSMUST00000027083			Pth2r			protein_coding
Sox9_E16_Sample1_peak_1150	chr1	65311314	65312771	+	103	NA	intron (ENSMUST00000027083.6, intron 1 of 12)	protein_coding-intron (ENSMUST00000027083.6, intron 1 of 12)	785	ENSMUST00000027083.6	ENSMUSG00000025946	ENSMUST00000027083			Pth2r			protein_coding
Sox9_E16_Sample1_peak_1151	chr1	65352731	65353408	+	39	NA	intron (ENSMUST00000027083.6, intron 8 of 12)	protein_coding-intron (ENSMUST00000027083.6, intron 8 of 12)	41812	ENSMUST00000027083.6	ENSMUSG00000025946	ENSMUST00000027083			Pth2r			protein_coding
Sox9_E16_Sample1_peak_1153	chr1	65440090	65440658	+	172	NA	Intergenic	Intergenic	-1389	ENSMUST00000187755.1	ENSMUSG00000100340	ENSMUST00000187755			Gm28923			processed_pseudogene
Sox9_E16_Sample1_peak_1154	chr1	65535598	65536226	+	155	NA	Intergenic	Intergenic	-11837	ENSMUST00000189087.1	ENSMUSG00000099819	ENSMUST00000189087			Gm28728			processed_pseudogene
Sox9_E16_Sample1_peak_1157	chr1	66174740	66176078	+	1319	NA	promoter-TSS (ENSMUST00000114015.7)	protein_coding-promoter-TSS (ENSMUST00000114015.7)	-62	ENSMUST00000124873.7	ENSMUSG00000015222	ENSMUST00000114018			Map2			protein_coding
Sox9_E16_Sample1_peak_1158	chr1	66186879	66187881	+	147	NA	intron (ENSMUST00000124873.7, intron 1 of 3)	protein_coding-intron (ENSMUST00000114015.7, intron 1 of 13)	11830	ENSMUST00000125844.1	ENSMUSG00000015222	ENSMUST00000114018			Map2			protein_coding
Sox9_E16_Sample1_peak_1159	chr1	66244824	66245429	+	122	NA	intron (ENSMUST00000124873.7, intron 2 of 3)	protein_coding-intron (ENSMUST00000114015.7, intron 2 of 13)	-6521	ENSMUST00000114018.9	ENSMUSG00000015222	ENSMUST00000114018			Map2			protein_coding
Sox9_E16_Sample1_peak_1160	chr1	66251838	66252473	+	58	NA	intron (ENSMUST00000024639.11, intron 1 of 11)	protein_coding-intron (ENSMUST00000024639.11, intron 1 of 11)	493	ENSMUST00000024639.11	ENSMUSG00000015222	ENSMUST00000114018			Map2			protein_coding
Sox9_E16_Sample1_peak_1161	chr1	66467857	66468725	+	585	NA	promoter-TSS (ENSMUST00000061620.16)	protein_coding-promoter-TSS (ENSMUST00000061620.16)	-76	ENSMUST00000061620.16	ENSMUSG00000055567	ENSMUST00000212557			Unc80			protein_coding
Sox9_E16_Sample1_peak_1162	chr1	66608038	66608863	+	290	NA	exon (ENSMUST00000061620.16, exon 28 of 65)	protein_coding-exon (ENSMUST00000061620.16, exon 28 of 65)	-65280	ENSMUST00000187179.1	ENSMUSG00000055567	ENSMUST00000212557			Unc80			protein_coding
Sox9_E16_Sample1_peak_1163	chr1	66617030	66617650	+	122	NA	intron (ENSMUST00000061620.16, intron 29 of 64)	protein_coding-intron (ENSMUST00000061620.16, intron 29 of 64)	-56390	ENSMUST00000187179.1	ENSMUSG00000055567	ENSMUST00000212557			Unc80			protein_coding
Sox9_E16_Sample1_peak_1164	chr1	66636402	66637317	+	222	NA	intron (ENSMUST00000212557.2, intron 36 of 63)	protein_coding-intron (ENSMUST00000061620.16, intron 37 of 64)	-36871	ENSMUST00000187179.1	ENSMUSG00000055567	ENSMUST00000212557			Unc80			protein_coding
Sox9_E16_Sample1_peak_1165	chr1	66648243	66648652	+	64	NA	exon (ENSMUST00000061620.16, exon 45 of 65)	protein_coding-exon (ENSMUST00000061620.16, exon 45 of 65)	-25283	ENSMUST00000187179.1	ENSMUSG00000055567	ENSMUST00000212557			Unc80			protein_coding
Sox9_E16_Sample1_peak_1166	chr1	66654901	66655969	+	787	NA	intron (ENSMUST00000212557.2, intron 50 of 63)	protein_coding-intron (ENSMUST00000061620.16, intron 51 of 64)	-18295	ENSMUST00000187179.1	ENSMUSG00000055567	ENSMUST00000212557			Unc80			protein_coding
Sox9_E16_Sample1_peak_1167	chr1	66674515	66675025	+	172	NA	TTS (ENSMUST00000187179.1)	protein_coding-TTS (ENSMUST00000187179.1)	1040	ENSMUST00000187179.1	ENSMUSG00000055567	ENSMUST00000212557			Unc80			protein_coding
Sox9_E16_Sample1_peak_1168	chr1	66700587	66701693	+	1806	NA	exon (ENSMUST00000151016.1, exon 1 of 4)	protein_coding-exon (ENSMUST00000151016.1, exon 1 of 4)	233	ENSMUST00000190404.1	ENSMUSG00000026005	ENSMUST00000113995			Rpe			protein_coding
Sox9_E16_Sample1_peak_1169	chr1	66816124	66818147	+	1078	NA	intron (ENSMUST00000113987.1, intron 1 of 7)	protein_coding-intron (ENSMUST00000068168.9, intron 1 of 13)	411	ENSMUST00000189846.1	ENSMUSG00000026004	ENSMUST00000068168			Kansl1l			protein_coding
Sox9_E16_Sample1_peak_1170	chr1	66832142	66833752	+	396	NA	intron (ENSMUST00000027153.5, intron 10 of 10)	protein_coding-intron (ENSMUST00000027153.5, intron 10 of 10)	-7033	ENSMUST00000193555.1	ENSMUSG00000103553	ENSMUST00000193555			Gm38218			TEC
Sox9_E16_Sample1_peak_1171	chr1	66838596	66838921	+	42	NA	intron (ENSMUST00000027153.5, intron 8 of 10)	protein_coding-intron (ENSMUST00000027153.5, intron 8 of 10)	10844	ENSMUST00000121857.1	ENSMUSG00000082769	ENSMUST00000121857			Gm15793			processed_pseudogene
Sox9_E16_Sample1_peak_1172	chr1	66839536	66840503	+	222	NA	intron (ENSMUST00000027153.5, intron 8 of 10)	protein_coding-intron (ENSMUST00000027153.5, intron 8 of 10)	9583	ENSMUST00000121857.1	ENSMUSG00000082769	ENSMUST00000121857			Gm15793			processed_pseudogene
Sox9_E16_Sample1_peak_1173	chr1	66846062	66846527	+	138	NA	intron (ENSMUST00000139208.1, intron 5 of 5)	protein_coding-intron (ENSMUST00000027153.5, intron 5 of 10)	3308	ENSMUST00000121857.1	ENSMUSG00000082769	ENSMUST00000121857			Gm15793			processed_pseudogene
Sox9_E16_Sample1_peak_1174	chr1	66862353	66863949	+	1404	NA	intron (ENSMUST00000027153.5, intron 1 of 10)	protein_coding-intron (ENSMUST00000027153.5, intron 1 of 10)	126	ENSMUST00000027153.5	ENSMUSG00000026003	ENSMUST00000027153			Acadl			protein_coding
Sox9_E16_Sample1_peak_1175	chr1	66895563	66896714	+	598	NA	Intergenic	Intergenic	29341	ENSMUST00000104140.1	ENSMUSG00000077328	ENSMUST00000104140			Gm25832			snoRNA
Sox9_E16_Sample1_peak_1176	chr1	66900994	66901613	+	134	NA	Intergenic	Intergenic	33395	ENSMUST00000186346.1	ENSMUSG00000061816	ENSMUST00000186202			Myl1			protein_coding
Sox9_E16_Sample1_peak_1177	chr1	66940536	66941187	+	130	NA	intron (ENSMUST00000027151.11, intron 1 of 6)	protein_coding-intron (ENSMUST00000027151.11, intron 1 of 6)	4282	ENSMUST00000027151.11	ENSMUSG00000061816	ENSMUST00000186202			Myl1			protein_coding
Sox9_E16_Sample1_peak_1178	chr1	66960564	66961203	+	189	NA	Intergenic	Intergenic	9054	ENSMUST00000121328.1	ENSMUSG00000082212	ENSMUST00000121328			Gm15826			processed_pseudogene
Sox9_E16_Sample1_peak_1179	chr1	66996460	66997528	+	294	NA	Intergenic	Intergenic	24071	ENSMUST00000133508.1	ENSMUSG00000026000	ENSMUST00000133508			Lancl1			protein_coding
Sox9_E16_Sample1_peak_1180	chr1	67000789	67001152	+	49	NA	exon (ENSMUST00000027149.11, exon 10 of 10)	protein_coding-exon (ENSMUST00000027149.11, exon 10 of 10)	20095	ENSMUST00000133508.1	ENSMUSG00000026000	ENSMUST00000133508			Lancl1			protein_coding
Sox9_E16_Sample1_peak_1181	chr1	67020505	67020944	+	71	NA	exon (ENSMUST00000189210.1, exon 1 of 1)	protein_coding-exon (ENSMUST00000189210.1, exon 1 of 1)	341	ENSMUST00000133508.1	ENSMUSG00000026000	ENSMUST00000133508			Lancl1			protein_coding
Sox9_E16_Sample1_peak_1182	chr1	67032070	67032914	+	160	NA	intron (ENSMUST00000119559.7, intron 3 of 9)	protein_coding-intron (ENSMUST00000027149.11, intron 3 of 9)	6342	ENSMUST00000119559.7	ENSMUSG00000026000	ENSMUST00000133508			Lancl1			protein_coding
Sox9_E16_Sample1_peak_1183	chr1	67038251	67039342	+	779	NA	promoter-TSS (ENSMUST00000027149.11)	protein_coding-promoter-TSS (ENSMUST00000027149.11)	38	ENSMUST00000119559.7	ENSMUSG00000026000	ENSMUST00000133508			Lancl1			protein_coding
Sox9_E16_Sample1_peak_1184	chr1	67061357	67062250	+	420	NA	Intergenic	Intergenic	-22931	ENSMUST00000113979.9	ENSMUSG00000026000	ENSMUST00000133508			Lancl1			protein_coding
Sox9_E16_Sample1_peak_1185	chr1	67077721	67078450	+	71	NA	Intergenic	Intergenic	-39213	ENSMUST00000113979.9	ENSMUSG00000026000	ENSMUST00000133508			Lancl1			protein_coding
Sox9_E16_Sample1_peak_1186	chr1	67173533	67174543	+	159	NA	intron (ENSMUST00000027144.7, intron 18 of 37)	protein_coding-intron (ENSMUST00000027144.7, intron 18 of 37)	51012	ENSMUST00000027144.7	ENSMUSG00000025991	ENSMUST00000027144			Cps1			protein_coding
Sox9_E16_Sample1_peak_1187	chr1	67178914	67179391	+	96	NA	intron (ENSMUST00000027144.7, intron 20 of 37)	protein_coding-intron (ENSMUST00000027144.7, intron 20 of 37)	56126	ENSMUST00000027144.7	ENSMUSG00000025991	ENSMUST00000027144			Cps1			protein_coding
Sox9_E16_Sample1_peak_1188	chr1	67212859	67213424	+	130	NA	intron (ENSMUST00000027144.7, intron 30 of 37)	protein_coding-intron (ENSMUST00000027144.7, intron 30 of 37)	-36059	ENSMUST00000140506.1	ENSMUSG00000086204	ENSMUST00000140506			Gm15668			lncRNA
Sox9_E16_Sample1_peak_1189	chr1	67436836	67437582	+	139	NA	Intergenic	Intergenic	-147844	ENSMUST00000119302.1	ENSMUSG00000082473	ENSMUST00000119302			Kif22-ps			processed_pseudogene
Sox9_E16_Sample1_peak_1190	chr1	67518220	67518987	+	233	NA	Intergenic	Intergenic	-66450	ENSMUST00000119302.1	ENSMUSG00000082473	ENSMUST00000119302			Kif22-ps			processed_pseudogene
Sox9_E16_Sample1_peak_1192	chr1	67640284	67641037	+	179	NA	Intergenic	Intergenic	23685	ENSMUST00000174899.2	ENSMUSG00000095282	ENSMUST00000174899			Gm22548			miRNA
Sox9_E16_Sample1_peak_1193	chr1	67894811	67895151	+	99	NA	Intergenic	Intergenic	-8249	ENSMUST00000192182.1	ENSMUSG00000104395	ENSMUST00000192182			Gm37957			TEC
Sox9_E16_Sample1_peak_1195	chr1	68046436	68046896	+	22	NA	intron (ENSMUST00000119142.7, intron 25 of 27)	protein_coding-intron (ENSMUST00000119142.7, intron 25 of 27)	22423	ENSMUST00000124160.3	ENSMUSG00000087329	ENSMUST00000124160			Gm15671			lncRNA
Sox9_E16_Sample1_peak_1196	chr1	68049762	68050643	+	197	NA	intron (ENSMUST00000119142.7, intron 25 of 27)	protein_coding-intron (ENSMUST00000119142.7, intron 25 of 27)	25959	ENSMUST00000124160.3	ENSMUSG00000087329	ENSMUST00000124160			Gm15671			lncRNA
Sox9_E16_Sample1_peak_1199	chr1	68780022	68781396	+	381	NA	intron (ENSMUST00000153432.1, intron 1 of 18)	protein_coding-intron (ENSMUST00000119142.7, intron 1 of 27)	-18982	ENSMUST00000195066.1	ENSMUSG00000103809	ENSMUST00000195066			Gm37061			TEC
Sox9_E16_Sample1_peak_1201	chr1	68956987	68957652	+	71	NA	intron (ENSMUST00000153432.1, intron 1 of 18)	protein_coding-intron (ENSMUST00000119142.7, intron 1 of 27)	149421	ENSMUST00000140116.1	ENSMUSG00000087514	ENSMUST00000140116			Gm16076			lncRNA
Sox9_E16_Sample1_peak_1202	chr1	69024722	69025381	+	318	NA	intron (ENSMUST00000153432.1, intron 1 of 18)	protein_coding-intron (ENSMUST00000119142.7, intron 1 of 27)	81689	ENSMUST00000140116.1	ENSMUSG00000087514	ENSMUST00000140116			Gm16076			lncRNA
Sox9_E16_Sample1_peak_1203	chr1	69059470	69060325	+	152	NA	intron (ENSMUST00000153432.1, intron 1 of 18)	protein_coding-intron (ENSMUST00000119142.7, intron 1 of 27)	46843	ENSMUST00000140116.1	ENSMUSG00000087514	ENSMUST00000140116			Gm16076			lncRNA
Sox9_E16_Sample1_peak_1204	chr1	69105677	69108775	+	341	NA	promoter-TSS (ENSMUST00000140116.1)	lncRNA-promoter-TSS (ENSMUST00000140116.1)	-486	ENSMUST00000140116.1	ENSMUSG00000087514	ENSMUST00000140116			Gm16076			lncRNA
Sox9_E16_Sample1_peak_1207	chr1	69241685	69242152	+	58	NA	Intergenic	Intergenic	-110619	ENSMUST00000122454.1	ENSMUSG00000084332	ENSMUST00000122454			Gm8840			processed_pseudogene
Sox9_E16_Sample1_peak_1208	chr1	69331525	69331905	+	114	NA	Intergenic	Intergenic	-45606	ENSMUST00000187740.1	ENSMUSG00000101387	ENSMUST00000187740			Pced1c-ps			processed_pseudogene
Sox9_E16_Sample1_peak_1209	chr1	69433717	69434643	+	246	NA	Intergenic	Intergenic	-6876	ENSMUST00000189646.1	ENSMUSG00000099804	ENSMUST00000189646			Gm28497			lncRNA
Sox9_E16_Sample1_peak_1210	chr1	69466749	69467116	+	41	NA	Intergenic	Intergenic	25876	ENSMUST00000189646.1	ENSMUSG00000099804	ENSMUST00000189646			Gm28497			lncRNA
Sox9_E16_Sample1_peak_1211	chr1	69470459	69471288	+	198	NA	Intergenic	Intergenic	22915	ENSMUST00000185991.1	ENSMUSG00000100354	ENSMUST00000185991			Gm29113			lncRNA
Sox9_E16_Sample1_peak_1214	chr1	69512899	69513749	+	58	NA	promoter-TSS (ENSMUST00000187100.1)	lncRNA-promoter-TSS (ENSMUST00000187100.1)	-608	ENSMUST00000187100.1	ENSMUSG00000101156	ENSMUST00000187100			Gm29114			lncRNA
Sox9_E16_Sample1_peak_1215	chr1	69580416	69581068	+	346	NA	intron (ENSMUST00000027146.8, intron 3 of 7)	protein_coding-intron (ENSMUST00000027146.8, intron 3 of 7)	17780	ENSMUST00000188962.1	ENSMUSG00000100815	ENSMUST00000188962			Gm29112			lncRNA
Sox9_E16_Sample1_peak_1217	chr1	69605761	69606346	+	165	NA	intron (ENSMUST00000027146.8, intron 3 of 7)	protein_coding-intron (ENSMUST00000027146.8, intron 3 of 7)	-7531	ENSMUST00000188962.1	ENSMUSG00000100815	ENSMUST00000188962			Gm29112			lncRNA
Sox9_E16_Sample1_peak_1218	chr1	69610681	69611724	+	330	NA	intron (ENSMUST00000027146.8, intron 3 of 7)	protein_coding-intron (ENSMUST00000027146.8, intron 3 of 7)	-12680	ENSMUST00000188962.1	ENSMUSG00000100815	ENSMUST00000188962			Gm29112			lncRNA
Sox9_E16_Sample1_peak_1219	chr1	69637970	69638628	+	171	NA	intron (ENSMUST00000027146.8, intron 3 of 7)	protein_coding-intron (ENSMUST00000027146.8, intron 3 of 7)	23762	ENSMUST00000190898.1	ENSMUSG00000099954	ENSMUST00000190898			Gm28112			lncRNA
Sox9_E16_Sample1_peak_1220	chr1	69656806	69657476	+	118	NA	intron (ENSMUST00000027146.8, intron 3 of 7)	protein_coding-intron (ENSMUST00000027146.8, intron 3 of 7)	4920	ENSMUST00000190898.1	ENSMUSG00000099954	ENSMUST00000190898			Gm28112			lncRNA
Sox9_E16_Sample1_peak_1221	chr1	69686267	69688180	+	590	NA	promoter-TSS (ENSMUST00000187184.6)	protein_coding-promoter-TSS (ENSMUST00000187184.6)	22	ENSMUST00000187184.6	ENSMUSG00000025997	ENSMUST00000191262			Ikzf2			protein_coding
Sox9_E16_Sample1_peak_1222	chr1	69727883	69729648	+	181	NA	Intergenic	Intergenic	-41520	ENSMUST00000187184.6	ENSMUSG00000025997	ENSMUST00000191262			Ikzf2			protein_coding
Sox9_E16_Sample1_peak_1223	chr1	69826579	69827451	+	311	NA	promoter-TSS (ENSMUST00000065425.11)	protein_coding-promoter-TSS (ENSMUST00000065425.11)	23	ENSMUST00000113940.3	ENSMUSG00000053153	ENSMUST00000065425			Spag16			protein_coding
Sox9_E16_Sample1_peak_1226	chr1	70725541	70726012	+	58	NA	promoter-TSS (ENSMUST00000053922.11)	protein_coding-promoter-TSS (ENSMUST00000053922.11)	24	ENSMUST00000159205.1	ENSMUSG00000045648	ENSMUST00000162182			Vwc2l			protein_coding
Sox9_E16_Sample1_peak_1227	chr1	71102234	71103722	+	1702	NA	exon (ENSMUST00000027393.7, exon 1 of 11)	protein_coding-exon (ENSMUST00000027393.7, exon 1 of 11)	168	ENSMUST00000027393.7	ENSMUSG00000026196	ENSMUST00000027393			Bard1			protein_coding
Sox9_E16_Sample1_peak_1228	chr1	71235264	71235759	+	163	NA	Intergenic	Intergenic	71576	ENSMUST00000188752.1	ENSMUSG00000050296	ENSMUST00000087268			Abca12			protein_coding
Sox9_E16_Sample1_peak_1230	chr1	71310406	71311154	+	216	NA	intron (ENSMUST00000087268.6, intron 18 of 52)	protein_coding-intron (ENSMUST00000087268.6, intron 18 of 52)	-3693	ENSMUST00000188752.1	ENSMUSG00000050296	ENSMUST00000087268			Abca12			protein_coding
Sox9_E16_Sample1_peak_1231	chr1	71383980	71384541	+	172	NA	intron (ENSMUST00000189102.1, intron 2 of 2)	protein_coding-intron (ENSMUST00000087268.6, intron 2 of 52)	30636	ENSMUST00000189102.1	ENSMUSG00000050296	ENSMUST00000087268			Abca12			protein_coding
Sox9_E16_Sample1_peak_1232	chr1	71397447	71398266	+	179	NA	intron (ENSMUST00000189102.1, intron 2 of 2)	protein_coding-intron (ENSMUST00000087268.6, intron 2 of 52)	17040	ENSMUST00000189102.1	ENSMUSG00000050296	ENSMUST00000087268			Abca12			protein_coding
Sox9_E16_Sample1_peak_1234	chr1	71556791	71557801	+	1240	NA	promoter-TSS (ENSMUST00000136443.1)	protein_coding-promoter-TSS (ENSMUST00000136443.1)	83	ENSMUST00000136443.1	ENSMUSG00000026192	ENSMUST00000154855			Atic			protein_coding
Sox9_E16_Sample1_peak_1235	chr1	71652606	71653950	+	894	NA	promoter-TSS (ENSMUST00000055226.12)	protein_coding-promoter-TSS (ENSMUST00000055226.12)	-57	ENSMUST00000126516.2	ENSMUSG00000073652	ENSMUST00000126516			Apol7d			lncRNA
Sox9_E16_Sample1_peak_1236	chr1	71723651	71724184	+	71	NA	Intergenic	Intergenic	-8993	ENSMUST00000191412.1	ENSMUSG00000100319	ENSMUST00000191412			Gm5256			processed_pseudogene
Sox9_E16_Sample1_peak_1239	chr1	71893277	71894229	+	268	NA	TTS (ENSMUST00000187553.1)	lncRNA-TTS (ENSMUST00000187553.1)	5182	ENSMUST00000189983.1	ENSMUSG00000101211	ENSMUST00000189983			Gm28818			lncRNA
Sox9_E16_Sample1_peak_1240	chr1	71937109	71938606	+	86	NA	Intergenic	Intergenic	-20732	ENSMUST00000187553.1	ENSMUSG00000101211	ENSMUST00000189983			Gm28818			lncRNA
Sox9_E16_Sample1_peak_1242	chr1	72182748	72183596	+	130	NA	intron (ENSMUST00000048860.8, intron 2 of 4)	protein_coding-intron (ENSMUST00000048860.8, intron 2 of 4)	29135	ENSMUST00000048860.8	ENSMUSG00000039395	ENSMUST00000048860			Mreg			protein_coding
Sox9_E16_Sample1_peak_1243	chr1	72211837	72212575	+	472	NA	exon (ENSMUST00000048860.8, exon 1 of 5)	protein_coding-exon (ENSMUST00000048860.8, exon 1 of 5)	101	ENSMUST00000048860.8	ENSMUSG00000039395	ENSMUST00000048860			Mreg			protein_coding
Sox9_E16_Sample1_peak_1244	chr1	72225674	72226944	+	744	NA	promoter-TSS (ENSMUST00000178786.1)	snRNA-promoter-TSS (ENSMUST00000178786.1)	69	ENSMUST00000178786.1	ENSMUSG00000094655	ENSMUST00000178786			Gm25360			snRNA
Sox9_E16_Sample1_peak_1245	chr1	72236349	72237379	+	361	NA	promoter-TSS (ENSMUST00000101806.2)	snRNA-promoter-TSS (ENSMUST00000101806.2)	-82	ENSMUST00000101806.2	ENSMUSG00000094050	ENSMUST00000101806			Gm23472			snRNA
Sox9_E16_Sample1_peak_1246	chr1	72243666	72244715	+	776	NA	promoter-TSS (ENSMUST00000177868.1)	snRNA-promoter-TSS (ENSMUST00000177868.1)	-23	ENSMUST00000177868.1	ENSMUSG00000093956	ENSMUST00000177868			Gm24497			snRNA
Sox9_E16_Sample1_peak_1247	chr1	72254380	72255884	+	604	NA	TTS (ENSMUST00000179876.1)	snRNA-TTS (ENSMUST00000179876.1)	124	ENSMUST00000179876.1	ENSMUSG00000093843	ENSMUST00000179876			Gm25939			snRNA
Sox9_E16_Sample1_peak_1248	chr1	72284004	72284622	+	392	NA	promoter-TSS (ENSMUST00000027380.11)	protein_coding-promoter-TSS (ENSMUST00000027380.11)	0	ENSMUST00000129458.1	ENSMUSG00000026189	ENSMUST00000027381			Pecr			protein_coding
Sox9_E16_Sample1_peak_1249	chr1	72306732	72307941	+	471	NA	promoter-TSS (ENSMUST00000027379.9)	protein_coding-promoter-TSS (ENSMUST00000027379.9)	-91	ENSMUST00000027379.9	ENSMUSG00000026187	ENSMUST00000027379			Xrcc5			protein_coding
Sox9_E16_Sample1_peak_1250	chr1	72316388	72316960	+	92	NA	intron (ENSMUST00000027379.9, intron 5 of 20)	protein_coding-intron (ENSMUST00000027379.9, intron 5 of 20)	9247	ENSMUST00000027379.9	ENSMUSG00000026187	ENSMUST00000027379			Xrcc5			protein_coding
Sox9_E16_Sample1_peak_1251	chr1	72383027	72383851	+	181	NA	exon (ENSMUST00000027379.9, exon 18 of 21)	protein_coding-exon (ENSMUST00000027379.9, exon 18 of 21)	76012	ENSMUST00000027379.9	ENSMUSG00000026187	ENSMUST00000027379			Xrcc5			protein_coding
Sox9_E16_Sample1_peak_1252	chr1	72399831	72400242	+	64	NA	Intergenic	Intergenic	-59463	ENSMUST00000146593.1	ENSMUSG00000085812	ENSMUST00000146593			Gm15843			processed_pseudogene
Sox9_E16_Sample1_peak_1253	chr1	72536702	72537400	+	85	NA	promoter-TSS (ENSMUST00000047786.5)	protein_coding-promoter-TSS (ENSMUST00000047786.5)	-121	ENSMUST00000047786.5	ENSMUSG00000039372	ENSMUST00000047786			2021-03-04			protein_coding
Sox9_E16_Sample1_peak_1254	chr1	72582884	72583949	+	840	NA	promoter-TSS (ENSMUST00000152225.1)	protein_coding-promoter-TSS (ENSMUST00000152225.1)	165	ENSMUST00000145868.7	ENSMUSG00000039354	ENSMUST00000133123			Smarcal1			protein_coding
Sox9_E16_Sample1_peak_1255	chr1	72599010	72600167	+	207	NA	TTS (ENSMUST00000156797.7)	protein_coding-TTS (ENSMUST00000156797.7)	13950	ENSMUST00000150725.7	ENSMUSG00000039354	ENSMUST00000133123			Smarcal1			protein_coding
Sox9_E16_Sample1_peak_1256	chr1	72672812	72673462	+	189	NA	intron (ENSMUST00000212573.1, intron 9 of 22)	protein_coding-intron (ENSMUST00000053499.5, intron 10 of 23)	-19727	ENSMUST00000211962.1	ENSMUSG00000110487	ENSMUST00000211962			Gm18035			processed_pseudogene
Sox9_E16_Sample1_peak_1257	chr1	72710950	72711830	+	243	NA	promoter-TSS (ENSMUST00000059980.10)	protein_coding-promoter-TSS (ENSMUST00000059980.10)	76	ENSMUST00000212432.1	ENSMUSG00000046330	ENSMUST00000212432			Rpl37a			protein_coding
Sox9_E16_Sample1_peak_1258	chr1	72718722	72719138	+	92	NA	Intergenic	Intergenic	7149	ENSMUST00000211963.1	ENSMUSG00000046330	ENSMUST00000212432			Rpl37a			protein_coding
Sox9_E16_Sample1_peak_1259	chr1	72755634	72756267	+	64	NA	Intergenic	Intergenic	44169	ENSMUST00000211963.1	ENSMUSG00000046330	ENSMUST00000212432			Rpl37a			protein_coding
Sox9_E16_Sample1_peak_1260	chr1	72805710	72806598	+	99	NA	Intergenic	Intergenic	-18349	ENSMUST00000047328.10	ENSMUSG00000039323	ENSMUST00000120564			Igfbp2			protein_coding
Sox9_E16_Sample1_peak_1261	chr1	72823956	72825532	+	233	NA	promoter-TSS (ENSMUST00000120564.1)	protein_coding-promoter-TSS (ENSMUST00000120564.1)	241	ENSMUST00000047328.10	ENSMUSG00000039323	ENSMUST00000120564			Igfbp2			protein_coding
Sox9_E16_Sample1_peak_1263	chr1	72870407	72871189	+	127	NA	intron (ENSMUST00000027377.8, intron 1 of 3)	protein_coding-intron (ENSMUST00000027377.8, intron 1 of 3)	3477	ENSMUST00000137339.1	ENSMUSG00000026185	ENSMUST00000027377			Igfbp5			protein_coding
Sox9_E16_Sample1_peak_1264	chr1	72873793	72875183	+	43	NA	promoter-TSS (ENSMUST00000137339.1)	protein_coding-promoter-TSS (ENSMUST00000137339.1)	-213	ENSMUST00000137339.1	ENSMUSG00000026185	ENSMUST00000027377			Igfbp5			protein_coding
Sox9_E16_Sample1_peak_1266	chr1	72912955	72913969	+	254	NA	Intergenic	Intergenic	-38578	ENSMUST00000027377.8	ENSMUSG00000026185	ENSMUST00000027377			Igfbp5			protein_coding
Sox9_E16_Sample1_peak_1267	chr1	72929310	72930358	+	406	NA	Intergenic	Intergenic	-54950	ENSMUST00000027377.8	ENSMUSG00000026185	ENSMUST00000027377			Igfbp5			protein_coding
Sox9_E16_Sample1_peak_1268	chr1	72944756	72946031	+	166	NA	Intergenic	Intergenic	-39451	ENSMUST00000188793.1	ENSMUSG00000101968	ENSMUST00000185768			1700027A15Rik			lncRNA
Sox9_E16_Sample1_peak_1269	chr1	72963384	72963668	+	45	NA	Intergenic	Intergenic	-21318	ENSMUST00000188793.1	ENSMUSG00000101968	ENSMUST00000185768			1700027A15Rik			lncRNA
Sox9_E16_Sample1_peak_1270	chr1	73027095	73027560	+	45	NA	Intergenic	Intergenic	2758	ENSMUST00000190525.1	ENSMUSG00000101968	ENSMUST00000185768			1700027A15Rik			lncRNA
Sox9_E16_Sample1_peak_1272	chr1	73251924	73252283	+	58	NA	Intergenic	Intergenic	-16961	ENSMUST00000190578.1	ENSMUSG00000101112	ENSMUST00000190578			Gm29185			lncRNA
Sox9_E16_Sample1_peak_1273	chr1	73307004	73307860	+	207	NA	Intergenic	Intergenic	4618	ENSMUST00000190038.1	ENSMUSG00000100697	ENSMUST00000190038			Gm29184			processed_pseudogene
Sox9_E16_Sample1_peak_1274	chr1	73361977	73364295	+	120	NA	Intergenic	Intergenic	-29110	ENSMUST00000183977.1	ENSMUSG00000098697	ENSMUST00000183977			Gm27315			misc_RNA
Sox9_E16_Sample1_peak_1275	chr1	73479526	73480130	+	130	NA	Intergenic	Intergenic	-32218	ENSMUST00000185703.1	ENSMUSG00000100044	ENSMUST00000185703			Gm9553			processed_pseudogene
Sox9_E16_Sample1_peak_1276	chr1	73546868	73547198	+	34	NA	Intergenic	Intergenic	-17243	ENSMUST00000186453.1	ENSMUSG00000100444	ENSMUST00000188155			C530043A13Rik			lncRNA
Sox9_E16_Sample1_peak_1277	chr1	73683045	73683974	+	103	NA	intron (ENSMUST00000189514.1, intron 6 of 8)	lncRNA-intron (ENSMUST00000189514.1, intron 6 of 8)	60438	ENSMUST00000191114.6	ENSMUSG00000100301	ENSMUST00000191114			6030407O03Rik			lncRNA
Sox9_E16_Sample1_peak_1278	chr1	73826143	73826718	+	114	NA	intron (ENSMUST00000188600.1, intron 2 of 7)	lncRNA-intron (ENSMUST00000188600.1, intron 2 of 7)	15487	ENSMUST00000188600.1	ENSMUSG00000101344	ENSMUST00000188600			Gm29183			lncRNA
Sox9_E16_Sample1_peak_1279	chr1	73862403	73863428	+	453	NA	exon (ENSMUST00000189514.1, exon 2 of 9)	lncRNA-exon (ENSMUST00000189514.1, exon 2 of 9)	1551	ENSMUST00000189514.1	ENSMUSG00000100301	ENSMUST00000191114			6030407O03Rik			lncRNA
Sox9_E16_Sample1_peak_1281	chr1	73914253	73914865	+	51	NA	exon (ENSMUST00000187691.6, exon 12 of 12)	protein_coding-exon (ENSMUST00000187691.6, exon 12 of 12)	13658	ENSMUST00000191527.6	ENSMUSG00000055322	ENSMUST00000189228			Tns1			protein_coding
Sox9_E16_Sample1_peak_1282	chr1	73932384	73933315	+	173	NA	intron (ENSMUST00000187584.6, intron 22 of 32)	protein_coding-intron (ENSMUST00000169786.7, intron 24 of 34)	-2038	ENSMUST00000185264.6	ENSMUSG00000055322	ENSMUST00000189228			Tns1			protein_coding
Sox9_E16_Sample1_peak_1283	chr1	73935516	73936049	+	93	NA	intron (ENSMUST00000187584.6, intron 22 of 32)	protein_coding-intron (ENSMUST00000169786.7, intron 24 of 34)	-4971	ENSMUST00000185264.6	ENSMUSG00000055322	ENSMUST00000189228			Tns1			protein_coding
Sox9_E16_Sample1_peak_1284	chr1	73954871	73955668	+	50	NA	intron (ENSMUST00000187584.6, intron 18 of 32)	protein_coding-intron (ENSMUST00000191104.6, intron 18 of 32)	7774	ENSMUST00000191367.1	ENSMUSG00000055322	ENSMUST00000189228			Tns1			protein_coding
Sox9_E16_Sample1_peak_1285	chr1	73962754	73963908	+	301	NA	promoter-TSS (ENSMUST00000191367.1)	protein_coding-promoter-TSS (ENSMUST00000191367.1)	-288	ENSMUST00000191367.1	ENSMUSG00000055322	ENSMUST00000189228			Tns1			protein_coding
Sox9_E16_Sample1_peak_1287	chr1	74008074	74009481	+	654	NA	intron (ENSMUST00000187584.6, intron 4 of 32)	protein_coding-intron (ENSMUST00000169786.7, intron 4 of 34)	-7210	ENSMUST00000190389.6	ENSMUSG00000055322	ENSMUST00000189228			Tns1			protein_coding
Sox9_E16_Sample1_peak_1289	chr1	74027014	74027908	+	39	NA	intron (ENSMUST00000191204.6, intron 3 of 7)	protein_coding-intron (ENSMUST00000191204.6, intron 3 of 7)	9672	ENSMUST00000187281.6	ENSMUSG00000055322	ENSMUST00000189228			Tns1			protein_coding
Sox9_E16_Sample1_peak_1290	chr1	74031276	74032261	+	85	NA	intron (ENSMUST00000191204.6, intron 3 of 7)	protein_coding-intron (ENSMUST00000191204.6, intron 3 of 7)	5365	ENSMUST00000187281.6	ENSMUSG00000055322	ENSMUST00000189228			Tns1			protein_coding
Sox9_E16_Sample1_peak_1291	chr1	74036654	74037287	+	127	NA	exon (ENSMUST00000190599.1, exon 1 of 4)	protein_coding-exon (ENSMUST00000190599.1, exon 1 of 4)	163	ENSMUST00000187281.6	ENSMUSG00000055322	ENSMUST00000189228			Tns1			protein_coding
Sox9_E16_Sample1_peak_1292	chr1	74068020	74069720	+	260	NA	intron (ENSMUST00000191204.6, intron 2 of 7)	protein_coding-intron (ENSMUST00000169786.7, intron 2 of 34)	22481	ENSMUST00000187584.6	ENSMUSG00000055322	ENSMUST00000189228			Tns1			protein_coding
Sox9_E16_Sample1_peak_1293	chr1	74098239	74099268	+	92	NA	intron (ENSMUST00000212888.1, intron 1 of 33)	protein_coding-intron (ENSMUST00000169786.7, intron 1 of 34)	-1885	ENSMUST00000188208.1	ENSMUSG00000055322	ENSMUST00000189228			Tns1			protein_coding
Sox9_E16_Sample1_peak_1294	chr1	74124246	74125368	+	216	NA	promoter-TSS (ENSMUST00000080167.10)	protein_coding-promoter-TSS (ENSMUST00000080167.10)	-358	ENSMUST00000191104.6	ENSMUSG00000055322	ENSMUST00000189228			Tns1			protein_coding
Sox9_E16_Sample1_peak_1295	chr1	74236100	74237211	+	475	NA	exon (ENSMUST00000006467.13, exon 1 of 10)	protein_coding-exon (ENSMUST00000006467.13, exon 1 of 10)	105	ENSMUST00000113819.1	ENSMUSG00000006304	ENSMUST00000113819			Arpc2			protein_coding
Sox9_E16_Sample1_peak_1296	chr1	74284261	74285320	+	886	NA	promoter-TSS (ENSMUST00000006462.13)	protein_coding-promoter-TSS (ENSMUST00000006462.13)	-52	ENSMUST00000006462.13	ENSMUSG00000006299	ENSMUST00000186833			Aamp			protein_coding
Sox9_E16_Sample1_peak_1297	chr1	74295424	74297024	+	352	NA	promoter-TSS (ENSMUST00000152603.7)	protein_coding-promoter-TSS (ENSMUST00000152603.7)	-529	ENSMUST00000152603.7	ENSMUSG00000006301	ENSMUST00000152603			Tmbim1			protein_coding
Sox9_E16_Sample1_peak_1298	chr1	74303558	74304482	+	382	NA	promoter-TSS (ENSMUST00000141560.1)	protein_coding-promoter-TSS (ENSMUST00000141560.1)	100	ENSMUST00000141560.1	ENSMUSG00000006301	ENSMUST00000152603			Tmbim1			protein_coding
Sox9_E16_Sample1_peak_1299	chr1	74332124	74333034	+	492	NA	promoter-TSS (ENSMUST00000087225.5)	protein_coding-promoter-TSS (ENSMUST00000087225.5)	-31	ENSMUST00000087225.5	ENSMUSG00000026179	ENSMUST00000138620			Pnkd			protein_coding
Sox9_E16_Sample1_peak_1300	chr1	74386712	74387271	+	233	NA	TTS (ENSMUST00000027368.5)	protein_coding-TTS (ENSMUST00000027368.5)	3391	ENSMUST00000134189.1	ENSMUSG00000026177	ENSMUST00000131511			Slc11a1			protein_coding
Sox9_E16_Sample1_peak_1301	chr1	74390265	74392314	+	236	NA	promoter-TSS (ENSMUST00000027367.13)	protein_coding-promoter-TSS (ENSMUST00000027367.13)	-220	ENSMUST00000027367.13	ENSMUSG00000026176	ENSMUST00000141175			Ctdsp1			protein_coding
Sox9_E16_Sample1_peak_1302	chr1	74396829	74398349	+	580	NA	TTS (ENSMUST00000027367.13)	protein_coding-TTS (ENSMUST00000027367.13)	3279	ENSMUST00000083534.1	ENSMUSG00000065468	ENSMUST00000083534			Mir26b			miRNA
Sox9_E16_Sample1_peak_1303	chr1	74505344	74506729	+	548	NA	promoter-TSS (ENSMUST00000044260.10)	protein_coding-promoter-TSS (ENSMUST00000044260.10)	-22	ENSMUST00000087215.6	ENSMUSG00000026174	ENSMUST00000147810			Cnot9			protein_coding
Sox9_E16_Sample1_peak_1304	chr1	74587570	74588525	+	971	NA	promoter-TSS (ENSMUST00000027315.13)	protein_coding-promoter-TSS (ENSMUST00000027315.13)	-19	ENSMUST00000113737.7	ENSMUSG00000026135	ENSMUST00000136865			Zfp142			protein_coding
Sox9_E16_Sample1_peak_1305	chr1	74601126	74601724	+	130	NA	promoter-TSS (ENSMUST00000027357.11)	protein_coding-promoter-TSS (ENSMUST00000027357.11)	-20	ENSMUST00000087183.10	ENSMUSG00000033276	ENSMUST00000087183			Stk36			protein_coding
Sox9_E16_Sample1_peak_1307	chr1	74661472	74662482	+	323	NA	intron (ENSMUST00000129890.7, intron 1 of 4)	protein_coding-intron (ENSMUST00000042125.14, intron 1 of 19)	160	ENSMUST00000153636.7	ENSMUSG00000033257	ENSMUST00000140591			Ttll4			protein_coding
Sox9_E16_Sample1_peak_1308	chr1	74713361	74713813	+	39	NA	promoter-TSS (ENSMUST00000027356.6)	protein_coding-promoter-TSS (ENSMUST00000027356.6)	13	ENSMUST00000027356.6	ENSMUSG00000026170	ENSMUST00000027356			Cyp27a1			protein_coding
Sox9_E16_Sample1_peak_1309	chr1	74748708	74749511	+	189	NA	promoter-TSS (ENSMUST00000113672.8)	protein_coding-promoter-TSS (ENSMUST00000113672.8)	112	ENSMUST00000081636.12	ENSMUSG00000006542	ENSMUST00000113672			Prkag3			protein_coding
Sox9_E16_Sample1_peak_1310	chr1	74772679	74773458	+	141	NA	intron (ENSMUST00000006716.7, intron 1 of 3)	protein_coding-intron (ENSMUST00000006716.7, intron 1 of 3)	1176	ENSMUST00000006716.7	ENSMUSG00000033227	ENSMUST00000189544			Wnt6			protein_coding
Sox9_E16_Sample1_peak_1311	chr1	74784165	74784642	+	122	NA	exon (ENSMUST00000006716.7, exon 4 of 4)	protein_coding-exon (ENSMUST00000006716.7, exon 4 of 4)	1964	ENSMUST00000189544.1	ENSMUSG00000033227	ENSMUST00000189544			Wnt6			protein_coding
Sox9_E16_Sample1_peak_1312	chr1	74803117	74803639	+	310	NA	exon (ENSMUST00000006718.14, exon 4 of 4)	protein_coding-exon (ENSMUST00000006718.14, exon 4 of 4)	10015	ENSMUST00000187238.1	ENSMUSG00000026167	ENSMUST00000187238			Wnt10a			protein_coding
Sox9_E16_Sample1_peak_1313	chr1	74807915	74808585	+	94	NA	Intergenic	Intergenic	14887	ENSMUST00000187238.1	ENSMUSG00000026167	ENSMUST00000187238			Wnt10a			protein_coding
Sox9_E16_Sample1_peak_1314	chr1	74816746	74817481	+	107	NA	Intergenic	Intergenic	23750	ENSMUST00000187238.1	ENSMUSG00000026167	ENSMUST00000187238			Wnt10a			protein_coding
Sox9_E16_Sample1_peak_1315	chr1	74854549	74855362	+	155	NA	promoter-TSS (ENSMUST00000160379.3)	protein_coding-promoter-TSS (ENSMUST00000160379.3)	21	ENSMUST00000160379.3	ENSMUSG00000090071	ENSMUST00000160379			Cdk5r2			protein_coding
Sox9_E16_Sample1_peak_1316	chr1	74900465	74901579	+	309	NA	promoter-TSS (ENSMUST00000083682.3)	miRNA-promoter-TSS (ENSMUST00000083682.3)	-301	ENSMUST00000083682.3	ENSMUSG00000065616	ENSMUST00000083682			Mir375			miRNA
Sox9_E16_Sample1_peak_1317	chr1	74948502	74949303	+	36	NA	intron (ENSMUST00000164097.3, intron 1 of 2)	protein_coding-intron (ENSMUST00000164097.3, intron 1 of 2)	2540	ENSMUST00000189364.1	ENSMUSG00000006538	ENSMUST00000189364			Ihh			protein_coding
Sox9_E16_Sample1_peak_1318	chr1	74951229	74951788	+	44	NA	promoter-TSS (ENSMUST00000189364.1)	protein_coding-promoter-TSS (ENSMUST00000189364.1)	-66	ENSMUST00000189364.1	ENSMUSG00000006538	ENSMUST00000189364			Ihh			protein_coding
Sox9_E16_Sample1_peak_1319	chr1	74964729	74965102	+	71	NA	Intergenic	Intergenic	10663	ENSMUST00000194616.1	ENSMUSG00000103145	ENSMUST00000194616			Gm37744			TEC
Sox9_E16_Sample1_peak_1321	chr1	75014086	75014724	+	48	NA	intron (ENSMUST00000152855.1, intron 2 of 4)	protein_coding-intron (ENSMUST00000152855.1, intron 2 of 4)	32234	ENSMUST00000152855.1	ENSMUSG00000026162	ENSMUST00000152855			Nhej1			protein_coding
Sox9_E16_Sample1_peak_1322	chr1	75016102	75016911	+	71	NA	intron (ENSMUST00000152855.1, intron 2 of 4)	protein_coding-intron (ENSMUST00000152855.1, intron 2 of 4)	30133	ENSMUST00000152855.1	ENSMUSG00000026162	ENSMUST00000152855			Nhej1			protein_coding
Sox9_E16_Sample1_peak_1323	chr1	75124613	75125521	+	553	NA	TTS (ENSMUST00000027405.5)	protein_coding-TTS (ENSMUST00000027405.5)	133	ENSMUST00000188033.1	ENSMUSG00000026162	ENSMUST00000152855			Nhej1			protein_coding
Sox9_E16_Sample1_peak_1324	chr1	75141376	75143284	+	380	NA	promoter-TSS (ENSMUST00000097694.10)	protein_coding-promoter-TSS (ENSMUST00000097694.10)	308	ENSMUST00000168720.7	ENSMUSG00000033159	ENSMUST00000168720			Cnppd1			protein_coding
Sox9_E16_Sample1_peak_1325	chr1	75168362	75169307	+	1172	NA	promoter-TSS (ENSMUST00000160282.1)	protein_coding-promoter-TSS (ENSMUST00000160282.1)	56	ENSMUST00000160282.1	ENSMUSG00000026197	ENSMUST00000160903			Zfand2b			protein_coding
Sox9_E16_Sample1_peak_1326	chr1	75179607	75180718	+	393	NA	TTS (ENSMUST00000040689.14)	protein_coding-TTS (ENSMUST00000040689.14)	124	ENSMUST00000159219.7	ENSMUSG00000026198	ENSMUST00000027396			Abcb6			protein_coding
Sox9_E16_Sample1_peak_1327	chr1	75191546	75192686	+	442	NA	promoter-TSS (ENSMUST00000040689.14)	protein_coding-promoter-TSS (ENSMUST00000040689.14)	-35	ENSMUST00000151887.8	ENSMUSG00000026199	ENSMUST00000134378			Ankzf1			protein_coding
Sox9_E16_Sample1_peak_1328	chr1	75210368	75211070	+	132	NA	promoter-TSS (ENSMUST00000027401.10)	protein_coding-promoter-TSS (ENSMUST00000027401.10)	34	ENSMUST00000131408.1	ENSMUSG00000026200	ENSMUST00000185448			Glb1l			protein_coding
Sox9_E16_Sample1_peak_1329	chr1	75218418	75219822	+	415	NA	promoter-TSS (ENSMUST00000079464.12)	protein_coding-promoter-TSS (ENSMUST00000079464.12)	123	ENSMUST00000187103.1	ENSMUSG00000026202	ENSMUST00000188593			Tuba4a			protein_coding
Sox9_E16_Sample1_peak_1330	chr1	75236121	75237149	+	896	NA	promoter-TSS (ENSMUST00000185654.2)	protein_coding-promoter-TSS (ENSMUST00000185654.2)	21	ENSMUST00000185654.2	ENSMUSG00000026203	ENSMUST00000055223			Dnajb2			protein_coding
Sox9_E16_Sample1_peak_1332	chr1	75251570	75252028	+	51	NA	promoter-TSS (ENSMUST00000191154.1)	lncRNA-promoter-TSS (ENSMUST00000191154.1)	-523	ENSMUST00000191154.1	ENSMUSG00000101840	ENSMUST00000191154			Gm28294			lncRNA
Sox9_E16_Sample1_peak_1333	chr1	75316799	75318075	+	1139	NA	promoter-TSS (ENSMUST00000113605.9)	protein_coding-promoter-TSS (ENSMUST00000113605.9)	10	ENSMUST00000191254.6	ENSMUSG00000026209	ENSMUST00000190005			Dnpep			protein_coding
Sox9_E16_Sample1_peak_1334	chr1	75337864	75338294	+	23	NA	Intergenic	Intergenic	-20089	ENSMUST00000188652.6	ENSMUSG00000026209	ENSMUST00000190005			Dnpep			protein_coding
Sox9_E16_Sample1_peak_1335	chr1	75381663	75382533	+	45	NA	promoter-TSS (ENSMUST00000113590.7)	protein_coding-promoter-TSS (ENSMUST00000113590.7)	-16	ENSMUST00000113590.7	ENSMUSG00000026207	ENSMUST00000187214			Speg			protein_coding
Sox9_E16_Sample1_peak_1336	chr1	75398720	75400455	+	218	NA	promoter-TSS (ENSMUST00000113588.7)	protein_coding-promoter-TSS (ENSMUST00000113588.7)	-498	ENSMUST00000113589.7	ENSMUSG00000026207	ENSMUST00000187214			Speg			protein_coding
Sox9_E16_Sample1_peak_1337	chr1	75422781	75423411	+	107	NA	promoter-TSS (ENSMUST00000143679.1)	protein_coding-promoter-TSS (ENSMUST00000143679.1)	-414	ENSMUST00000143679.1	ENSMUSG00000026207	ENSMUST00000187214			Speg			protein_coding
Sox9_E16_Sample1_peak_1338	chr1	75435689	75436401	+	207	NA	promoter-TSS (ENSMUST00000131545.7)	protein_coding-promoter-TSS (ENSMUST00000131545.7)	-42	ENSMUST00000131545.7	ENSMUSG00000033021	ENSMUST00000141124			Gmppa			protein_coding
Sox9_E16_Sample1_peak_1339	chr1	75458485	75459015	+	64	NA	intron (ENSMUST00000113577.7, intron 1 of 8)	protein_coding-intron (ENSMUST00000037708.9, intron 1 of 9)	8051	ENSMUST00000037708.9	ENSMUSG00000033007	ENSMUST00000037708			Asic4			protein_coding
Sox9_E16_Sample1_peak_1340	chr1	75461331	75462036	+	34	NA	intron (ENSMUST00000113577.7, intron 1 of 8)	protein_coding-intron (ENSMUST00000037708.9, intron 1 of 9)	9078	ENSMUST00000194916.1	ENSMUSG00000102605	ENSMUST00000194916			Gm37264			TEC
Sox9_E16_Sample1_peak_1341	chr1	75478715	75479800	+	842	NA	promoter-TSS (ENSMUST00000050899.6)	protein_coding-promoter-TSS (ENSMUST00000050899.6)	14	ENSMUST00000079205.13	ENSMUSG00000032997	ENSMUST00000143496			Chpf			protein_coding
Sox9_E16_Sample1_peak_1342	chr1	75487089	75488096	+	399	NA	promoter-TSS (ENSMUST00000156499.1)	protein_coding-promoter-TSS (ENSMUST00000156499.1)	210	ENSMUST00000154636.1	ENSMUSG00000026211	ENSMUST00000138352			Obsl1			protein_coding
Sox9_E16_Sample1_peak_1343	chr1	75505234	75506719	+	488	NA	promoter-TSS (ENSMUST00000155084.7)	protein_coding-promoter-TSS (ENSMUST00000155084.7)	-335	ENSMUST00000155084.7	ENSMUSG00000026211	ENSMUST00000138352			Obsl1			protein_coding
Sox9_E16_Sample1_peak_1344	chr1	75521270	75522017	+	526	NA	promoter-TSS (ENSMUST00000113553.1)	protein_coding-promoter-TSS (ENSMUST00000113553.1)	91	ENSMUST00000113553.1	ENSMUSG00000026213	ENSMUST00000113553			Stk11ip			protein_coding
Sox9_E16_Sample1_peak_1345	chr1	75546070	75546937	+	372	NA	promoter-TSS (ENSMUST00000027415.11)	protein_coding-promoter-TSS (ENSMUST00000027415.11)	7	ENSMUST00000027415.11	ENSMUSG00000006576	ENSMUST00000189794			Slc4a3			protein_coding
Sox9_E16_Sample1_peak_1346	chr1	75559272	75559962	+	344	NA	TTS (ENSMUST00000027415.11)	protein_coding-TTS (ENSMUST00000027415.11)	7908	ENSMUST00000132110.1	ENSMUSG00000006576	ENSMUST00000189794			Slc4a3			protein_coding
Sox9_E16_Sample1_peak_1351	chr1	75936512	75937577	+	235	NA	Intergenic	Intergenic	81712	ENSMUST00000188786.1	ENSMUSG00000099996	ENSMUST00000188786			Gm29065			lncRNA
Sox9_E16_Sample1_peak_1352	chr1	76018545	76019637	+	416	NA	promoter-TSS (ENSMUST00000188786.1)	lncRNA-promoter-TSS (ENSMUST00000188786.1)	-335	ENSMUST00000188786.1	ENSMUSG00000099996	ENSMUST00000188786			Gm29065			lncRNA
Sox9_E16_Sample1_peak_1353	chr1	76024525	76025552	+	192	NA	Intergenic	Intergenic	-6282	ENSMUST00000188786.1	ENSMUSG00000099996	ENSMUST00000188786			Gm29065			lncRNA
Sox9_E16_Sample1_peak_1354	chr1	76030694	76031997	+	85	NA	Intergenic	Intergenic	-12589	ENSMUST00000188786.1	ENSMUSG00000099996	ENSMUST00000188786			Gm29065			lncRNA
Sox9_E16_Sample1_peak_1358	chr1	76529613	76530565	+	99	NA	Intergenic	Intergenic	20529	ENSMUST00000183584.1	ENSMUSG00000098611	ENSMUST00000183584			Mir6343			miRNA
Sox9_E16_Sample1_peak_1359	chr1	76942535	76943684	+	439	NA	intron (ENSMUST00000191156.1, intron 1 of 1)	lncRNA-intron (ENSMUST00000191156.1, intron 1 of 1)	84683	ENSMUST00000191156.1	ENSMUSG00000100534	ENSMUST00000191156			Gm816			lncRNA
Sox9_E16_Sample1_peak_1360	chr1	77051133	77051713	+	138	NA	Intergenic	Intergenic	-23631	ENSMUST00000191156.1	ENSMUSG00000100534	ENSMUST00000191156			Gm816			lncRNA
Sox9_E16_Sample1_peak_1361	chr1	77080977	77081624	+	58	NA	Intergenic	Intergenic	-53508	ENSMUST00000191156.1	ENSMUSG00000100534	ENSMUST00000191156			Gm816			lncRNA
Sox9_E16_Sample1_peak_1363	chr1	77181831	77182369	+	51	NA	Intergenic	Intergenic	-35108	ENSMUST00000193479.1	ENSMUSG00000102904	ENSMUST00000193479			Gm38265			TEC
Sox9_E16_Sample1_peak_1364	chr1	77184224	77184986	+	107	NA	Intergenic	Intergenic	-37613	ENSMUST00000193479.1	ENSMUSG00000102904	ENSMUST00000193479			Gm38265			TEC
Sox9_E16_Sample1_peak_1365	chr1	77213355	77213978	+	78	NA	Intergenic	Intergenic	-66674	ENSMUST00000193479.1	ENSMUSG00000102904	ENSMUST00000193479			Gm38265			TEC
Sox9_E16_Sample1_peak_1366	chr1	77219709	77220356	+	64	NA	Intergenic	Intergenic	-73040	ENSMUST00000193479.1	ENSMUSG00000102904	ENSMUST00000193479			Gm38265			TEC
Sox9_E16_Sample1_peak_1367	chr1	77226853	77227446	+	155	NA	Intergenic	Intergenic	-80157	ENSMUST00000193479.1	ENSMUSG00000102904	ENSMUST00000193479			Gm38265			TEC
Sox9_E16_Sample1_peak_1368	chr1	77258829	77259296	+	334	NA	Intergenic	Intergenic	-112070	ENSMUST00000193479.1	ENSMUSG00000102904	ENSMUST00000193479			Gm38265			TEC
Sox9_E16_Sample1_peak_1370	chr1	77460934	77462094	+	51	NA	intron (ENSMUST00000027451.12, intron 3 of 17)	protein_coding-intron (ENSMUST00000027451.12, intron 3 of 17)	35254	ENSMUST00000184495.1	ENSMUSG00000099141	ENSMUST00000184495			Mir6352			miRNA
Sox9_E16_Sample1_peak_1371	chr1	77468895	77469574	+	113	NA	intron (ENSMUST00000027451.12, intron 3 of 17)	protein_coding-intron (ENSMUST00000027451.12, intron 3 of 17)	27534	ENSMUST00000184495.1	ENSMUSG00000099141	ENSMUST00000184495			Mir6352			miRNA
Sox9_E16_Sample1_peak_1372	chr1	77473479	77473761	+	47	NA	intron (ENSMUST00000027451.12, intron 3 of 17)	protein_coding-intron (ENSMUST00000027451.12, intron 3 of 17)	23148	ENSMUST00000184495.1	ENSMUSG00000099141	ENSMUST00000184495			Mir6352			miRNA
Sox9_E16_Sample1_peak_1373	chr1	77513618	77516747	+	241	NA	promoter-TSS (ENSMUST00000027451.12)	protein_coding-promoter-TSS (ENSMUST00000027451.12)	-94	ENSMUST00000188797.6	ENSMUSG00000026235	ENSMUST00000187346			Epha4			protein_coding
Sox9_E16_Sample1_peak_1375	chr1	77538372	77538909	+	130	NA	Intergenic	Intergenic	23360	ENSMUST00000189147.1	ENSMUSG00000101849	ENSMUST00000189147			Gm28386			lncRNA
Sox9_E16_Sample1_peak_1376	chr1	77695218	77695577	+	130	NA	Intergenic	Intergenic	124725	ENSMUST00000185671.1	ENSMUSG00000101506	ENSMUST00000185671			Gm28385			processed_pseudogene
Sox9_E16_Sample1_peak_1377	chr1	77801787	77802335	+	45	NA	Intergenic	Intergenic	96385	ENSMUST00000083281.1	ENSMUSG00000065215	ENSMUST00000083281			Gm26263			snRNA
Sox9_E16_Sample1_peak_1379	chr1	77981507	77982353	+	207	NA	Intergenic	Intergenic	-9554	ENSMUST00000189245.1	ENSMUSG00000102052	ENSMUST00000189245			Gm28387			lncRNA
Sox9_E16_Sample1_peak_1380	chr1	78008960	78009437	+	99	NA	Intergenic	Intergenic	-36822	ENSMUST00000189245.1	ENSMUSG00000102052	ENSMUST00000189245			Gm28387			lncRNA
Sox9_E16_Sample1_peak_1382	chr1	78216044	78217831	+	190	NA	exon (ENSMUST00000238744.1, exon 1 of 1)	processed_pseudogene-exon (ENSMUST00000238744.1, exon 1 of 1)	539	ENSMUST00000238744.1	ENSMUSG00000118426	ENSMUST00000238744			Gm2102			processed_pseudogene
Sox9_E16_Sample1_peak_1383	chr1	78292284	78292783	+	114	NA	Intergenic	Intergenic	-17812	ENSMUST00000036172.9	ENSMUSG00000032908	ENSMUST00000036172			Sgpp2			protein_coding
Sox9_E16_Sample1_peak_1384	chr1	78309873	78311251	+	174	NA	intron (ENSMUST00000036172.9, intron 1 of 4)	protein_coding-intron (ENSMUST00000036172.9, intron 1 of 4)	217	ENSMUST00000036172.9	ENSMUSG00000032908	ENSMUST00000036172			Sgpp2			protein_coding
Sox9_E16_Sample1_peak_1385	chr1	78340527	78341021	+	64	NA	promoter-TSS (ENSMUST00000188113.1)	lncRNA-promoter-TSS (ENSMUST00000188113.1)	-668	ENSMUST00000188113.1	ENSMUSG00000099561	ENSMUST00000188113			Gm28410			lncRNA
Sox9_E16_Sample1_peak_1387	chr1	78488531	78489677	+	828	NA	promoter-TSS (ENSMUST00000068333.13)	protein_coding-promoter-TSS (ENSMUST00000068333.13)	-207	ENSMUST00000068333.13	ENSMUSG00000026245	ENSMUST00000189529			Farsb			protein_coding
Sox9_E16_Sample1_peak_1388	chr1	78510899	78512154	+	133	NA	promoter-TSS (ENSMUST00000012331.6)	protein_coding-promoter-TSS (ENSMUST00000012331.6)	-286	ENSMUST00000152111.1	ENSMUSG00000012187	ENSMUST00000012331			Mogat1			protein_coding
Sox9_E16_Sample1_peak_1389	chr1	78536767	78537895	+	238	NA	promoter-TSS (ENSMUST00000125458.1)	protein_coding-promoter-TSS (ENSMUST00000125458.1)	-297	ENSMUST00000125458.1	ENSMUSG00000012187	ENSMUST00000012331			Mogat1			protein_coding
Sox9_E16_Sample1_peak_1392	chr1	78647146	78647634	+	51	NA	Intergenic	Intergenic	-10435	ENSMUST00000035779.14	ENSMUSG00000032883	ENSMUST00000148608			Acsl3			protein_coding
Sox9_E16_Sample1_peak_1393	chr1	78656424	78658921	+	760	NA	promoter-TSS (ENSMUST00000035779.14)	protein_coding-promoter-TSS (ENSMUST00000035779.14)	-153	ENSMUST00000035779.14	ENSMUSG00000032883	ENSMUST00000148608			Acsl3			protein_coding
Sox9_E16_Sample1_peak_1394	chr1	78819405	78820374	+	137	NA	exon (ENSMUST00000057262.7, exon 2 of 2)	protein_coding-exon (ENSMUST00000057262.7, exon 2 of 2)	-1369	ENSMUST00000186681.1	ENSMUSG00000101324	ENSMUST00000186681			Gm29187			lncRNA
Sox9_E16_Sample1_peak_1395	chr1	79439793	79440501	+	198	NA	promoter-TSS (ENSMUST00000049972.5)	protein_coding-promoter-TSS (ENSMUST00000049972.5)	-27	ENSMUST00000049972.5	ENSMUSG00000050711	ENSMUST00000185234			Scg2			protein_coding
Sox9_E16_Sample1_peak_1396	chr1	79580975	79581629	+	245	NA	Intergenic	Intergenic	39732	ENSMUST00000195349.1	ENSMUSG00000102235	ENSMUST00000195349			Gm37886			TEC
Sox9_E16_Sample1_peak_1397	chr1	79655006	79655882	+	109	NA	intron (ENSMUST00000162342.7, intron 1 of 4)	protein_coding-intron (ENSMUST00000159312.1, intron 1 of 4)	16521	ENSMUST00000159312.1	ENSMUSG00000054702	ENSMUST00000160706			Ap1s3			protein_coding
Sox9_E16_Sample1_peak_1398	chr1	79671347	79672673	+	873	NA	promoter-TSS (ENSMUST00000159312.1)	protein_coding-promoter-TSS (ENSMUST00000159312.1)	-38	ENSMUST00000162342.7	ENSMUSG00000054702	ENSMUST00000160706			Ap1s3			protein_coding
Sox9_E16_Sample1_peak_1399	chr1	79678028	79679071	+	237	NA	Intergenic	Intergenic	-6577	ENSMUST00000162342.7	ENSMUSG00000054702	ENSMUST00000160706			Ap1s3			protein_coding
Sox9_E16_Sample1_peak_1400	chr1	79696957	79698096	+	579	NA	Intergenic	Intergenic	25130	ENSMUST00000127771.7	ENSMUSG00000073643	ENSMUST00000187005			Wdfy1			protein_coding
Sox9_E16_Sample1_peak_1401	chr1	79711186	79711781	+	78	NA	intron (ENSMUST00000113513.7, intron 8 of 11)	protein_coding-intron (ENSMUST00000113512.7, intron 8 of 11)	11173	ENSMUST00000127771.7	ENSMUSG00000073643	ENSMUST00000187005			Wdfy1			protein_coding
Sox9_E16_Sample1_peak_1402	chr1	79745872	79746663	+	439	NA	intron (ENSMUST00000113512.7, intron 1 of 11)	protein_coding-intron (ENSMUST00000048820.13, intron 1 of 4)	15454	ENSMUST00000186464.1	ENSMUSG00000073643	ENSMUST00000187005			Wdfy1			protein_coding
Sox9_E16_Sample1_peak_1403	chr1	79752371	79753202	+	78	NA	intron (ENSMUST00000113512.7, intron 1 of 11)	protein_coding-intron (ENSMUST00000048820.13, intron 1 of 4)	8935	ENSMUST00000186464.1	ENSMUSG00000073643	ENSMUST00000187005			Wdfy1			protein_coding
Sox9_E16_Sample1_peak_1404	chr1	79760850	79762158	+	608	NA	intron (ENSMUST00000113512.7, intron 1 of 11)	protein_coding-intron (ENSMUST00000048820.13, intron 1 of 4)	217	ENSMUST00000186464.1	ENSMUSG00000073643	ENSMUST00000187005			Wdfy1			protein_coding
Sox9_E16_Sample1_peak_1405	chr1	79775758	79776514	+	763	NA	promoter-TSS (ENSMUST00000143368.7)	protein_coding-promoter-TSS (ENSMUST00000143368.7)	7	ENSMUST00000143368.7	ENSMUSG00000073643	ENSMUST00000187005			Wdfy1			protein_coding
Sox9_E16_Sample1_peak_1406	chr1	79824129	79824454	+	58	NA	intron (ENSMUST00000190724.1, intron 1 of 4)	protein_coding-intron (ENSMUST00000027467.10, intron 1 of 8)	-2969	ENSMUST00000189793.6	ENSMUSG00000026249	ENSMUST00000189793			Serpine2			protein_coding
Sox9_E16_Sample1_peak_1407	chr1	79832869	79833347	+	39	NA	intron (ENSMUST00000190724.1, intron 1 of 4)	protein_coding-intron (ENSMUST00000027467.10, intron 1 of 8)	-11786	ENSMUST00000189793.6	ENSMUSG00000026249	ENSMUST00000189793			Serpine2			protein_coding
Sox9_E16_Sample1_peak_1408	chr1	79857900	79859166	+	569	NA	exon (ENSMUST00000027467.10, exon 1 of 9)	protein_coding-exon (ENSMUST00000027467.10, exon 1 of 9)	102	ENSMUST00000191026.1	ENSMUSG00000026249	ENSMUST00000189793			Serpine2			protein_coding
Sox9_E16_Sample1_peak_1409	chr1	79891001	79891584	+	114	NA	Intergenic	Intergenic	-30112	ENSMUST00000190724.1	ENSMUSG00000026249	ENSMUST00000189793			Serpine2			protein_coding
Sox9_E16_Sample1_peak_1410	chr1	79921160	79921930	+	163	NA	TTS (ENSMUST00000165691.2)	processed_pseudogene-TTS (ENSMUST00000165691.2)	1881	ENSMUST00000165691.2	ENSMUSG00000067106	ENSMUST00000165691			Gm5529			processed_pseudogene
Sox9_E16_Sample1_peak_1411	chr1	79932096	79933164	+	751	NA	Intergenic	Intergenic	-9204	ENSMUST00000165691.2	ENSMUSG00000067106	ENSMUST00000165691			Gm5529			processed_pseudogene
Sox9_E16_Sample1_peak_1413	chr1	80180841	80181269	+	64	NA	Intergenic	Intergenic	-3664	ENSMUST00000191325.1	ENSMUSG00000099552	ENSMUST00000185548			9830004L10Rik			lncRNA
Sox9_E16_Sample1_peak_1414	chr1	80215502	80215802	+	66	NA	intron (ENSMUST00000161427.1, intron 3 of 3)	protein_coding-intron (ENSMUST00000161427.1, intron 3 of 3)	-1708	ENSMUST00000058748.1	ENSMUSG00000043230	ENSMUST00000058748			Fam124b			protein_coding
Sox9_E16_Sample1_peak_1415	chr1	80249975	80250454	+	51	NA	Intergenic	Intergenic	5983	ENSMUST00000192258.1	ENSMUSG00000103404	ENSMUST00000192258			Gm37932			TEC
Sox9_E16_Sample1_peak_1416	chr1	80339539	80341417	+	1272	NA	promoter-TSS (ENSMUST00000163119.7)	protein_coding-promoter-TSS (ENSMUST00000163119.7)	2	ENSMUST00000163119.7	ENSMUSG00000004364	ENSMUST00000164108			Cul3			protein_coding
Sox9_E16_Sample1_peak_1417	chr1	80757863	80758881	+	129	NA	promoter-TSS (ENSMUST00000077946.11)	protein_coding-promoter-TSS (ENSMUST00000077946.11)	76	ENSMUST00000077946.11	ENSMUSG00000038608	ENSMUST00000191505			Dock10			protein_coding
Sox9_E16_Sample1_peak_1421	chr1	81520436	81521376	+	205	NA	exon (ENSMUST00000192484.1, exon 1 of 1)	TEC-exon (ENSMUST00000192484.1, exon 1 of 1)	1435	ENSMUST00000192484.1	ENSMUSG00000104029	ENSMUST00000192484			Gm37210			TEC
Sox9_E16_Sample1_peak_1422	chr1	81593344	81594918	+	361	NA	Intergenic	Intergenic	-36648	ENSMUST00000191337.1	ENSMUSG00000101986	ENSMUST00000191337			Gm6198			processed_pseudogene
Sox9_E16_Sample1_peak_1423	chr1	81675167	81675686	+	34	NA	Intergenic	Intergenic	67543	ENSMUST00000117185.1	ENSMUSG00000087008	ENSMUST00000117185			Gm5530			processed_pseudogene
Sox9_E16_Sample1_peak_1424	chr1	81718120	81718953	+	307	NA	Intergenic	Intergenic	24433	ENSMUST00000117185.1	ENSMUSG00000087008	ENSMUST00000117185			Gm5530			processed_pseudogene
Sox9_E16_Sample1_peak_1425	chr1	81744350	81745328	+	260	NA	Intergenic	Intergenic	-1870	ENSMUST00000117185.1	ENSMUSG00000087008	ENSMUST00000117185			Gm5530			processed_pseudogene
Sox9_E16_Sample1_peak_1426	chr1	81753976	81755812	+	140	NA	Intergenic	Intergenic	-11925	ENSMUST00000117185.1	ENSMUSG00000087008	ENSMUST00000117185			Gm5530			processed_pseudogene
Sox9_E16_Sample1_peak_1427	chr1	81900485	81901296	+	187	NA	Intergenic	Intergenic	103649	ENSMUST00000186198.1	ENSMUSG00000100561	ENSMUST00000186198			Gm7516			processed_pseudogene
Sox9_E16_Sample1_peak_1429	chr1	81974059	81974534	+	107	NA	Intergenic	Intergenic	-130884	ENSMUST00000195065.1	ENSMUSG00000103571	ENSMUST00000195065			Gm37114			TEC
Sox9_E16_Sample1_peak_1430	chr1	82031101	82031689	+	92	NA	Intergenic	Intergenic	-73785	ENSMUST00000195065.1	ENSMUSG00000103571	ENSMUST00000195065			Gm37114			TEC
Sox9_E16_Sample1_peak_1431	chr1	82041249	82042198	+	259	NA	Intergenic	Intergenic	-63457	ENSMUST00000195065.1	ENSMUSG00000103571	ENSMUST00000195065			Gm37114			TEC
Sox9_E16_Sample1_peak_1432	chr1	82070237	82071037	+	237	NA	Intergenic	Intergenic	-34543	ENSMUST00000195065.1	ENSMUSG00000103571	ENSMUST00000195065			Gm37114			TEC
Sox9_E16_Sample1_peak_1433	chr1	82124277	82125593	+	212	NA	Intergenic	Intergenic	-6981	ENSMUST00000183462.1	ENSMUSG00000098797	ENSMUST00000183462			Mir6344			miRNA
Sox9_E16_Sample1_peak_1434	chr1	82150447	82151272	+	198	NA	Intergenic	Intergenic	18943	ENSMUST00000183462.1	ENSMUSG00000098797	ENSMUST00000183462			Mir6344			miRNA
Sox9_E16_Sample1_peak_1435	chr1	82184106	82184577	+	39	NA	Intergenic	Intergenic	-48771	ENSMUST00000023262.5	ENSMUSG00000022591	ENSMUST00000023262			Gm9747			protein_coding
Sox9_E16_Sample1_peak_1436	chr1	82200095	82200227	+	41	NA	Intergenic	Intergenic	-32951	ENSMUST00000023262.5	ENSMUSG00000022591	ENSMUST00000023262			Gm9747			protein_coding
Sox9_E16_Sample1_peak_1437	chr1	82203751	82204644	+	115	NA	Intergenic	Intergenic	-28915	ENSMUST00000023262.5	ENSMUSG00000022591	ENSMUST00000023262			Gm9747			protein_coding
Sox9_E16_Sample1_peak_1438	chr1	82220754	82221921	+	130	NA	Intergenic	Intergenic	-11775	ENSMUST00000023262.5	ENSMUSG00000022591	ENSMUST00000023262			Gm9747			protein_coding
Sox9_E16_Sample1_peak_1439	chr1	82241009	82241548	+	64	NA	intron (ENSMUST00000069799.2, intron 1 of 1)	protein_coding-intron (ENSMUST00000069799.2, intron 1 of 1)	8166	ENSMUST00000023262.5	ENSMUSG00000022591	ENSMUST00000023262			Gm9747			protein_coding
Sox9_E16_Sample1_peak_1440	chr1	82273982	82274414	+	35	NA	intron (ENSMUST00000069799.2, intron 1 of 1)	protein_coding-intron (ENSMUST00000069799.2, intron 1 of 1)	17218	ENSMUST00000069799.2	ENSMUSG00000055980	ENSMUST00000069799			Irs1			protein_coding
Sox9_E16_Sample1_peak_1441	chr1	82283010	82284371	+	376	NA	intron (ENSMUST00000069799.2, intron 1 of 1)	protein_coding-intron (ENSMUST00000069799.2, intron 1 of 1)	7726	ENSMUST00000069799.2	ENSMUSG00000055980	ENSMUST00000069799			Irs1			protein_coding
Sox9_E16_Sample1_peak_1442	chr1	82290359	82293002	+	1201	NA	promoter-TSS (ENSMUST00000069799.2)	protein_coding-promoter-TSS (ENSMUST00000069799.2)	-264	ENSMUST00000069799.2	ENSMUSG00000055980	ENSMUST00000069799			Irs1			protein_coding
Sox9_E16_Sample1_peak_1443	chr1	82316199	82317027	+	942	NA	promoter-TSS (ENSMUST00000187475.1)	protein_coding-promoter-TSS (ENSMUST00000187475.1)	-29	ENSMUST00000187475.1	ENSMUSG00000026142	ENSMUST00000027322			Rhbdd1			protein_coding
Sox9_E16_Sample1_peak_1444	chr1	82428900	82430158	+	642	NA	intron (ENSMUST00000140020.1, intron 6 of 6)	protein_coding-intron (ENSMUST00000027322.13, intron 6 of 6)	-26783	ENSMUST00000187929.1	ENSMUSG00000100786	ENSMUST00000187929			Gm28940			lncRNA
Sox9_E16_Sample1_peak_1445	chr1	82476196	82477355	+	299	NA	intron (ENSMUST00000087050.6, intron 37 of 47)	protein_coding-intron (ENSMUST00000087050.6, intron 37 of 47)	-74029	ENSMUST00000187929.1	ENSMUSG00000100786	ENSMUST00000187929			Gm28940			lncRNA
Sox9_E16_Sample1_peak_1447	chr1	82554563	82555376	+	238	NA	intron (ENSMUST00000135271.1, intron 4 of 6)	protein_coding-intron (ENSMUST00000087050.6, intron 4 of 47)	31823	ENSMUST00000135271.1	ENSMUSG00000067158	ENSMUST00000135271			Col4a4			protein_coding
Sox9_E16_Sample1_peak_1448	chr1	82577537	82578675	+	592	NA	intron (ENSMUST00000087050.6, intron 1 of 47)	protein_coding-intron (ENSMUST00000087050.6, intron 1 of 47)	8686	ENSMUST00000135271.1	ENSMUSG00000067158	ENSMUST00000135271			Col4a4			protein_coding
Sox9_E16_Sample1_peak_1449	chr1	82586389	82587589	+	608	NA	promoter-TSS (ENSMUST00000087050.6)	protein_coding-promoter-TSS (ENSMUST00000087050.6)	13	ENSMUST00000113457.8	ENSMUSG00000079465	ENSMUST00000125563			Col4a3			protein_coding
Sox9_E16_Sample1_peak_1450	chr1	82602919	82604007	+	390	NA	intron (ENSMUST00000141994.1, intron 1 of 1)	protein_coding-intron (ENSMUST00000113457.8, intron 1 of 51)	16487	ENSMUST00000113457.8	ENSMUSG00000079465	ENSMUST00000125563			Col4a3			protein_coding
Sox9_E16_Sample1_peak_1451	chr1	82616209	82616844	+	34	NA	intron (ENSMUST00000141994.1, intron 1 of 1)	protein_coding-intron (ENSMUST00000113457.8, intron 1 of 51)	-18487	ENSMUST00000083121.1	ENSMUSG00000065055	ENSMUST00000083121			n-R5s213			rRNA
Sox9_E16_Sample1_peak_1452	chr1	82641153	82641845	+	226	NA	exon (ENSMUST00000141994.1, exon 2 of 2)	protein_coding-exon (ENSMUST00000141994.1, exon 2 of 2)	6486	ENSMUST00000083121.1	ENSMUSG00000065055	ENSMUST00000083121			n-R5s213			rRNA
Sox9_E16_Sample1_peak_1453	chr1	82717740	82718584	+	251	NA	intron (ENSMUST00000113457.8, intron 51 of 51)	protein_coding-intron (ENSMUST00000113457.8, intron 51 of 51)	2858	ENSMUST00000125563.7	ENSMUSG00000079465	ENSMUST00000125563			Col4a3			protein_coding
Sox9_E16_Sample1_peak_1454	chr1	82724784	82725550	+	907	NA	promoter-TSS (ENSMUST00000181720.1)	lncRNA-promoter-TSS (ENSMUST00000181720.1)	2	ENSMUST00000186858.1	ENSMUSG00000097564	ENSMUST00000181720			C430014B12Rik			lncRNA
Sox9_E16_Sample1_peak_1455	chr1	82783421	82784018	+	155	NA	Intergenic	Intergenic	-6509	ENSMUST00000186121.1	ENSMUSG00000099771	ENSMUST00000186121			Gm19257			processed_pseudogene
Sox9_E16_Sample1_peak_1457	chr1	82815271	82816263	+	79	NA	Intergenic	Intergenic	-4068	ENSMUST00000186334.1	ENSMUSG00000100170	ENSMUST00000186334			Gm28942			lncRNA
Sox9_E16_Sample1_peak_1458	chr1	82839140	82840293	+	926	NA	promoter-TSS (ENSMUST00000063380.10)	protein_coding-promoter-TSS (ENSMUST00000063380.10)	-18	ENSMUST00000190046.6	ENSMUSG00000026159	ENSMUST00000190046			Agfg1			protein_coding
Sox9_E16_Sample1_peak_1459	chr1	82844932	82845484	+	92	NA	intron (ENSMUST00000186043.1, intron 1 of 5)	protein_coding-intron (ENSMUST00000063380.10, intron 1 of 12)	5135	ENSMUST00000186043.1	ENSMUSG00000026159	ENSMUST00000190046			Agfg1			protein_coding
Sox9_E16_Sample1_peak_1460	chr1	82930787	82931038	+	51	NA	exon (ENSMUST00000222182.1, exon 1 of 1)	protein_coding-exon (ENSMUST00000222182.1, exon 1 of 1)	487	ENSMUST00000222182.1	ENSMUSG00000113846	ENSMUST00000222182			Gm6217			protein_coding
Sox9_E16_Sample1_peak_1462	chr1	83037807	83039268	+	306	NA	promoter-TSS (ENSMUST00000045560.14)	protein_coding-promoter-TSS (ENSMUST00000045560.14)	-89	ENSMUST00000045560.14	ENSMUSG00000038496	ENSMUST00000142805			Slc19a3			protein_coding
Sox9_E16_Sample1_peak_1463	chr1	83075913	83076379	+	45	NA	Intergenic	Intergenic	9044	ENSMUST00000190858.1	ENSMUSG00000099691	ENSMUST00000190858			Gm29518			processed_pseudogene
Sox9_E16_Sample1_peak_1464	chr1	83084564	83085860	+	249	NA	Intergenic	Intergenic	18110	ENSMUST00000190858.1	ENSMUSG00000099691	ENSMUST00000190858			Gm29518			processed_pseudogene
Sox9_E16_Sample1_peak_1465	chr1	83099342	83100398	+	276	NA	Intergenic	Intergenic	-16896	ENSMUST00000027351.12	ENSMUSG00000026166	ENSMUST00000186832			Ccl20			protein_coding
Sox9_E16_Sample1_peak_1466	chr1	83135426	83136489	+	215	NA	Intergenic	Intergenic	19164	ENSMUST00000186832.1	ENSMUSG00000026166	ENSMUST00000186832			Ccl20			protein_coding
Sox9_E16_Sample1_peak_1467	chr1	83141655	83142698	+	578	NA	Intergenic	Intergenic	-15808	ENSMUST00000186994.1	ENSMUSG00000101173	ENSMUST00000186994			Gm29519			processed_pseudogene
Sox9_E16_Sample1_peak_1468	chr1	83159392	83160317	+	639	NA	promoter-TSS (ENSMUST00000065403.6)	protein_coding-promoter-TSS (ENSMUST00000065403.6)	73	ENSMUST00000065403.6	ENSMUSG00000053161	ENSMUST00000065403			Daw1			protein_coding
Sox9_E16_Sample1_peak_1471	chr1	83345198	83346954	+	427	NA	intron (ENSMUST00000160237.1, intron 2 of 2)	protein_coding-intron (ENSMUST00000053075.14, intron 3 of 9)	-13490	ENSMUST00000194004.1	ENSMUSG00000104374	ENSMUST00000194004			Gm37517			TEC
Sox9_E16_Sample1_peak_1472	chr1	83407323	83408558	+	488	NA	intron (ENSMUST00000160567.1, intron 1 of 1)	protein_coding-intron (ENSMUST00000053075.14, intron 1 of 9)	199	ENSMUST00000160237.1	ENSMUSG00000026163	ENSMUST00000053075			Sphkap			protein_coding
Sox9_E16_Sample1_peak_1473	chr1	84089381	84090172	+	134	NA	intron (ENSMUST00000176720.1, intron 2 of 2)	protein_coding-intron (ENSMUST00000168574.8, intron 2 of 2)	-36523	ENSMUST00000175948.1	ENSMUSG00000045658	ENSMUST00000176720			Pid1			protein_coding
Sox9_E16_Sample1_peak_1474	chr1	84284126	84285049	+	251	NA	promoter-TSS (ENSMUST00000168574.8)	protein_coding-promoter-TSS (ENSMUST00000168574.8)	24	ENSMUST00000177458.1	ENSMUSG00000045658	ENSMUST00000176720			Pid1			protein_coding
Sox9_E16_Sample1_peak_1475	chr1	84387365	84388368	+	329	NA	intron (ENSMUST00000049126.12, intron 11 of 12)	protein_coding-intron (ENSMUST00000049126.12, intron 11 of 12)	7533	ENSMUST00000191700.1	ENSMUSG00000104396	ENSMUST00000191700			Gm37959			TEC
Sox9_E16_Sample1_peak_1476	chr1	84395402	84396568	+	267	NA	promoter-TSS (ENSMUST00000191700.1)	TEC-promoter-TSS (ENSMUST00000191700.1)	-586	ENSMUST00000191700.1	ENSMUSG00000104396	ENSMUST00000191700			Gm37959			TEC
Sox9_E16_Sample1_peak_1477	chr1	84404137	84406027	+	153	NA	intron (ENSMUST00000049126.12, intron 10 of 12)	protein_coding-intron (ENSMUST00000049126.12, intron 10 of 12)	-9683	ENSMUST00000191700.1	ENSMUSG00000104396	ENSMUST00000191700			Gm37959			TEC
Sox9_E16_Sample1_peak_1480	chr1	84695269	84696399	+	742	NA	promoter-TSS (ENSMUST00000175513.1)	miRNA-promoter-TSS (ENSMUST00000175513.1)	-5	ENSMUST00000175513.1	ENSMUSG00000093254	ENSMUST00000175513			Mir5126			miRNA
Sox9_E16_Sample1_peak_1481	chr1	84838419	84840361	+	561	NA	promoter-TSS (ENSMUST00000027421.12)	protein_coding-promoter-TSS (ENSMUST00000027421.12)	-79	ENSMUST00000185909.6	ENSMUSG00000026219	ENSMUST00000186648			Trip12			protein_coding
Sox9_E16_Sample1_peak_1483	chr1	84933683	84935620	+	141	NA	intron (ENSMUST00000027422.6, intron 1 of 4)	protein_coding-intron (ENSMUST00000027422.6, intron 1 of 4)	206	ENSMUST00000186980.1	ENSMUSG00000026220	ENSMUST00000186980			Slc16a14			protein_coding
Sox9_E16_Sample1_peak_1486	chr1	85269853	85270240	+	32	NA	promoter-TSS (ENSMUST00000159582.7)	protein_coding-promoter-TSS (ENSMUST00000159582.7)	97	ENSMUST00000159582.7	ENSMUSG00000052477	ENSMUST00000161267			C130026I21Rik			protein_coding
Sox9_E16_Sample1_peak_1490	chr1	85585660	85586270	+	87	NA	exon (ENSMUST00000128339.7, exon 3 of 7)	protein_coding-exon (ENSMUST00000128339.7, exon 3 of 7)	-1687	ENSMUST00000186740.1	ENSMUSG00000070034	ENSMUST00000128339			Sp110			protein_coding
Sox9_E16_Sample1_peak_1492	chr1	85600247	85601081	+	386	NA	promoter-TSS (ENSMUST00000080204.10)	protein_coding-promoter-TSS (ENSMUST00000080204.10)	-39	ENSMUST00000080204.10	ENSMUSG00000070031	ENSMUST00000159234			Sp140			protein_coding
Sox9_E16_Sample1_peak_1493	chr1	85625010	85625464	+	30	NA	intron (ENSMUST00000080204.10, intron 7 of 16)	protein_coding-intron (ENSMUST00000080204.10, intron 7 of 16)	-7241	ENSMUST00000161497.1	ENSMUSG00000070031	ENSMUST00000159234			Sp140			protein_coding
Sox9_E16_Sample1_peak_1494	chr1	85649996	85650730	+	23	NA	intron (ENSMUST00000147552.7, intron 1 of 15)	protein_coding-intron (ENSMUST00000054279.14, intron 1 of 11)	222	ENSMUST00000161540.1	ENSMUSG00000090246	ENSMUST00000161540			Gm17017			lncRNA
Sox9_E16_Sample1_peak_1495	chr1	85703206	85704054	+	1094	NA	intron (ENSMUST00000141709.1, intron 1 of 4)	protein_coding-intron (ENSMUST00000066427.10, intron 17 of 19)	188	ENSMUST00000141709.1	ENSMUSG00000026222	ENSMUST00000141998			Sp100			protein_coding
Sox9_E16_Sample1_peak_1496	chr1	85735933	85736733	+	229	NA	intron (ENSMUST00000159325.2, intron 1 of 2)	protein_coding-intron (ENSMUST00000064788.13, intron 1 of 5)	221	ENSMUST00000161453.1	ENSMUSG00000052760	ENSMUST00000162038			A630001G21Rik			protein_coding
Sox9_E16_Sample1_peak_1497	chr1	85741060	85741405	+	61	NA	intron (ENSMUST00000159122.7, intron 3 of 7)	protein_coding-intron (ENSMUST00000159122.7, intron 3 of 7)	-4603	ENSMUST00000064788.13	ENSMUSG00000052760	ENSMUST00000162038			A630001G21Rik			protein_coding
Sox9_E16_Sample1_peak_1498	chr1	85793119	85794725	+	715	NA	promoter-TSS (ENSMUST00000097666.3)	protein_coding-promoter-TSS (ENSMUST00000097666.3)	381	ENSMUST00000126962.2	ENSMUSG00000036707	ENSMUST00000126962			Cab39			protein_coding
Sox9_E16_Sample1_peak_1499	chr1	85799847	85800454	+	225	NA	intron (ENSMUST00000097666.3, intron 2 of 9)	protein_coding-intron (ENSMUST00000097666.3, intron 2 of 9)	5639	ENSMUST00000097666.3	ENSMUSG00000036707	ENSMUST00000126962			Cab39			protein_coding
Sox9_E16_Sample1_peak_1500	chr1	85810429	85811051	+	71	NA	intron (ENSMUST00000097666.3, intron 2 of 9)	protein_coding-intron (ENSMUST00000097666.3, intron 2 of 9)	16229	ENSMUST00000097666.3	ENSMUSG00000036707	ENSMUST00000126962			Cab39			protein_coding
Sox9_E16_Sample1_peak_1503	chr1	85838872	85840017	+	121	NA	intron (ENSMUST00000113360.7, intron 4 of 8)	protein_coding-intron (ENSMUST00000097666.3, intron 5 of 9)	-3636	ENSMUST00000187623.1	ENSMUSG00000036707	ENSMUST00000126962			Cab39			protein_coding
Sox9_E16_Sample1_peak_1504	chr1	85894250	85895827	+	389	NA	intron (ENSMUST00000027425.15, intron 1 of 5)	protein_coding-intron (ENSMUST00000027425.15, intron 1 of 5)	419	ENSMUST00000185569.1	ENSMUSG00000026223	ENSMUST00000027425			Itm2c			protein_coding
Sox9_E16_Sample1_peak_1505	chr1	85908940	85909910	+	247	NA	TTS (ENSMUST00000027425.15)	protein_coding-TTS (ENSMUST00000027425.15)	3264	ENSMUST00000139837.1	ENSMUSG00000026223	ENSMUST00000027425			Itm2c			protein_coding
Sox9_E16_Sample1_peak_1506	chr1	85915953	85917413	+	95	NA	Intergenic	Intergenic	10522	ENSMUST00000139837.1	ENSMUSG00000026223	ENSMUST00000027425			Itm2c			protein_coding
Sox9_E16_Sample1_peak_1508	chr1	85936262	85936510	+	28	NA	exon (ENSMUST00000190367.1, exon 1 of 2)	lncRNA-exon (ENSMUST00000190367.1, exon 1 of 2)	946	ENSMUST00000190367.1	ENSMUSG00000099767	ENSMUST00000190367			Gm28884			lncRNA
Sox9_E16_Sample1_peak_1509	chr1	86018112	86018927	+	264	NA	exon (ENSMUST00000149469.2, exon 1 of 4)	protein_coding-exon (ENSMUST00000149469.2, exon 1 of 4)	451	ENSMUST00000149469.2	ENSMUSG00000026226	ENSMUST00000152501			Spata3			protein_coding
Sox9_E16_Sample1_peak_1510	chr1	86038463	86038789	+	45	NA	Intergenic	Intergenic	-7237	ENSMUST00000027429.10	ENSMUSG00000026227	ENSMUST00000165824			2810459M11Rik			protein_coding
Sox9_E16_Sample1_peak_1511	chr1	86045752	86046969	+	461	NA	exon (ENSMUST00000027429.10, exon 1 of 3)	protein_coding-exon (ENSMUST00000027429.10, exon 1 of 3)	497	ENSMUST00000165824.2	ENSMUSG00000026227	ENSMUST00000165824			2810459M11Rik			protein_coding
Sox9_E16_Sample1_peak_1512	chr1	86059097	86059839	+	113	NA	Intergenic	Intergenic	-4919	ENSMUST00000147807.7	ENSMUSG00000026229	ENSMUST00000152184			Psmd1			protein_coding
Sox9_E16_Sample1_peak_1513	chr1	86064285	86065220	+	629	NA	promoter-TSS (ENSMUST00000127104.1)	protein_coding-promoter-TSS (ENSMUST00000127104.1)	60	ENSMUST00000133480.7	ENSMUSG00000026229	ENSMUST00000152184			Psmd1			protein_coding
Sox9_E16_Sample1_peak_1514	chr1	86154192	86155076	+	536	NA	promoter-TSS (ENSMUST00000027434.14)	protein_coding-promoter-TSS (ENSMUST00000027434.14)	-146	ENSMUST00000123618.7	ENSMUSG00000062590	ENSMUST00000123618			Armc9			protein_coding
Sox9_E16_Sample1_peak_1515	chr1	86181878	86182241	+	39	NA	intron (ENSMUST00000131412.7, intron 9 of 20)	protein_coding-intron (ENSMUST00000027434.14, intron 9 of 24)	-14331	ENSMUST00000150059.7	ENSMUSG00000062590	ENSMUST00000123618			Armc9			protein_coding
Sox9_E16_Sample1_peak_1516	chr1	86234061	86235482	+	236	NA	intron (ENSMUST00000150059.7, intron 7 of 8)	protein_coding-intron (ENSMUST00000027434.14, intron 19 of 24)	-9795	ENSMUST00000126579.1	ENSMUSG00000062590	ENSMUST00000123618			Armc9			protein_coding
Sox9_E16_Sample1_peak_1517	chr1	86302954	86304168	+	400	NA	promoter-TSS (ENSMUST00000188695.1)	protein_coding-promoter-TSS (ENSMUST00000188695.1)	30	ENSMUST00000188695.1	ENSMUSG00000079445	ENSMUST00000113306			B3gnt7			protein_coding
Sox9_E16_Sample1_peak_1518	chr1	86310695	86311731	+	233	NA	Intergenic	Intergenic	-7154	ENSMUST00000187004.1	ENSMUSG00000099644	ENSMUST00000187004			Gm28626			lncRNA
Sox9_E16_Sample1_peak_1519	chr1	86358774	86360180	+	1089	NA	promoter-TSS (ENSMUST00000027438.7)	protein_coding-promoter-TSS (ENSMUST00000027438.7)	-77	ENSMUST00000027438.7	ENSMUSG00000026234	ENSMUST00000185676			Ncl			protein_coding
Sox9_E16_Sample1_peak_1520	chr1	86434085	86435659	+	352	NA	Intergenic	Intergenic	8543	ENSMUST00000046004.5	ENSMUSG00000036574	ENSMUST00000046004			Tex44			protein_coding
Sox9_E16_Sample1_peak_1521	chr1	86440639	86443071	+	210	NA	Intergenic	Intergenic	15526	ENSMUST00000046004.5	ENSMUSG00000036574	ENSMUST00000046004			Tex44			protein_coding
Sox9_E16_Sample1_peak_1522	chr1	86470717	86471281	+	40	NA	Intergenic	Intergenic	-2660	ENSMUST00000163337.3	ENSMUSG00000101328	ENSMUST00000163337			Rpl30-ps6			processed_pseudogene
Sox9_E16_Sample1_peak_1523	chr1	86472126	86473117	+	510	NA	Intergenic	Intergenic	-1038	ENSMUST00000163337.3	ENSMUSG00000101328	ENSMUST00000163337			Rpl30-ps6			processed_pseudogene
Sox9_E16_Sample1_peak_1525	chr1	86487165	86488409	+	695	NA	Intergenic	Intergenic	14128	ENSMUST00000163337.3	ENSMUSG00000101328	ENSMUST00000163337			Rpl30-ps6			processed_pseudogene
Sox9_E16_Sample1_peak_1526	chr1	86491755	86492171	+	60	NA	Intergenic	Intergenic	18304	ENSMUST00000163337.3	ENSMUSG00000101328	ENSMUST00000163337			Rpl30-ps6			processed_pseudogene
Sox9_E16_Sample1_peak_1527	chr1	86497527	86498125	+	89	NA	Intergenic	Intergenic	24167	ENSMUST00000163337.3	ENSMUSG00000101328	ENSMUST00000163337			Rpl30-ps6			processed_pseudogene
Sox9_E16_Sample1_peak_1528	chr1	86503240	86504616	+	673	NA	Intergenic	Intergenic	-22798	ENSMUST00000045897.14	ENSMUSG00000026238	ENSMUST00000188533			Ptma			protein_coding
Sox9_E16_Sample1_peak_1529	chr1	86525059	86527012	+	385	NA	promoter-TSS (ENSMUST00000045897.14)	protein_coding-promoter-TSS (ENSMUST00000045897.14)	-691	ENSMUST00000045897.14	ENSMUSG00000026238	ENSMUST00000188533			Ptma			protein_coding
Sox9_E16_Sample1_peak_1530	chr1	86528074	86528788	+	179	NA	intron (ENSMUST00000188699.6, intron 2 of 4)	protein_coding-intron (ENSMUST00000045897.14, intron 1 of 4)	1624	ENSMUST00000188533.1	ENSMUSG00000026238	ENSMUST00000188533			Ptma			protein_coding
Sox9_E16_Sample1_peak_1531	chr1	86532084	86532513	+	42	NA	Intergenic	Intergenic	5491	ENSMUST00000188533.1	ENSMUSG00000026238	ENSMUST00000188533			Ptma			protein_coding
Sox9_E16_Sample1_peak_1533	chr1	86581962	86582910	+	880	NA	promoter-TSS (ENSMUST00000121534.7)	protein_coding-promoter-TSS (ENSMUST00000121534.7)	81	ENSMUST00000150653.1	ENSMUSG00000026239	ENSMUST00000143674			Pde6d			protein_coding
Sox9_E16_Sample1_peak_1534	chr1	86669633	86671042	+	224	NA	intron (ENSMUST00000027449.5, intron 1 of 2)	protein_coding-intron (ENSMUST00000027449.5, intron 1 of 2)	234	ENSMUST00000027449.5	ENSMUSG00000026241	ENSMUST00000027449			Nppc			protein_coding
Sox9_E16_Sample1_peak_1535	chr1	86703403	86704584	+	336	NA	intron (ENSMUST00000188121.6, intron 1 of 3)	protein_coding-intron (ENSMUST00000065694.7, intron 1 of 20)	150	ENSMUST00000065694.7	ENSMUSG00000053333	ENSMUST00000168237			Dis3l2			protein_coding
Sox9_E16_Sample1_peak_1536	chr1	87011131	87012081	+	127	NA	intron (ENSMUST00000190618.6, intron 14 of 20)	protein_coding-intron (ENSMUST00000065694.7, intron 13 of 20)	23336	ENSMUST00000195266.1	ENSMUSG00000102956	ENSMUST00000195266			Gm37017			TEC
Sox9_E16_Sample1_peak_1537	chr1	87030691	87031418	+	113	NA	intron (ENSMUST00000168237.7, intron 15 of 21)	protein_coding-intron (ENSMUST00000065694.7, intron 14 of 20)	-5669	ENSMUST00000195625.1	ENSMUSG00000103984	ENSMUST00000195625			Gm37447			TEC
Sox9_E16_Sample1_peak_1538	chr1	87035483	87036371	+	230	NA	promoter-TSS (ENSMUST00000195625.1)	TEC-promoter-TSS (ENSMUST00000195625.1)	-796	ENSMUST00000195625.1	ENSMUSG00000103984	ENSMUST00000195625			Gm37447			TEC
Sox9_E16_Sample1_peak_1539	chr1	87040886	87041371	+	92	NA	intron (ENSMUST00000168237.7, intron 15 of 21)	protein_coding-intron (ENSMUST00000065694.7, intron 14 of 20)	4405	ENSMUST00000195625.1	ENSMUSG00000103984	ENSMUST00000195625			Gm37447			TEC
Sox9_E16_Sample1_peak_1540	chr1	87078182	87078470	+	64	NA	Intergenic	Intergenic	-1845	ENSMUST00000186823.1	ENSMUSG00000101625	ENSMUST00000186823			Gm29371			lncRNA
Sox9_E16_Sample1_peak_1541	chr1	87184603	87185088	+	81	NA	exon (ENSMUST00000044533.8, exon 4 of 13)	protein_coding-exon (ENSMUST00000044533.8, exon 4 of 13)	1532	ENSMUST00000044533.8	ENSMUSG00000036480	ENSMUST00000044533			Prss56			protein_coding
Sox9_E16_Sample1_peak_1542	chr1	87186794	87187265	+	146	NA	exon (ENSMUST00000044533.8, exon 10 of 13)	protein_coding-exon (ENSMUST00000044533.8, exon 10 of 13)	-3578	ENSMUST00000189970.1	ENSMUSG00000026251	ENSMUST00000186373			Chrnd			protein_coding
Sox9_E16_Sample1_peak_1543	chr1	87213458	87214701	+	897	NA	promoter-TSS (ENSMUST00000113231.3)	protein_coding-promoter-TSS (ENSMUST00000113231.3)	100	ENSMUST00000123735.7	ENSMUSG00000026254	ENSMUST00000113232			Eif4e2			protein_coding
Sox9_E16_Sample1_peak_1544	chr1	87264065	87264576	+	34	NA	promoter-TSS (ENSMUST00000027472.6)	protein_coding-promoter-TSS (ENSMUST00000027472.6)	-43	ENSMUST00000118687.7	ENSMUSG00000026255	ENSMUST00000150831			Efhd1			protein_coding
Sox9_E16_Sample1_peak_1545	chr1	87326710	87327920	+	580	NA	exon (ENSMUST00000187038.1, exon 1 of 1)	protein_coding-exon (ENSMUST00000187038.1, exon 1 of 1)	249	ENSMUST00000173173.7	ENSMUSG00000048000	ENSMUST00000172736			Gigyf2			protein_coding
Sox9_E16_Sample1_peak_1546	chr1	87393665	87394897	+	165	NA	intron (ENSMUST00000113212.3, intron 1 of 2)	protein_coding-intron (ENSMUST00000027475.14, intron 8 of 28)	448	ENSMUST00000113212.3	ENSMUSG00000079436	ENSMUST00000113212			Kcnj13			protein_coding
Sox9_E16_Sample1_peak_1547	chr1	87509614	87510981	+	211	NA	promoter-TSS (ENSMUST00000027477.14)	protein_coding-promoter-TSS (ENSMUST00000027477.14)	65	ENSMUST00000027477.14	ENSMUSG00000026259	ENSMUST00000068681			Ngef			protein_coding
Sox9_E16_Sample1_peak_1548	chr1	87573461	87575087	+	175	NA	promoter-TSS (ENSMUST00000068681.11)	protein_coding-promoter-TSS (ENSMUST00000068681.11)	228	ENSMUST00000163606.7	ENSMUSG00000079434	ENSMUST00000172222			Neu2			protein_coding
Sox9_E16_Sample1_peak_1549	chr1	87755647	87756652	+	599	NA	promoter-TSS (ENSMUST00000113186.7)	protein_coding-promoter-TSS (ENSMUST00000113186.7)	56	ENSMUST00000134603.1	ENSMUSG00000026289	ENSMUST00000113186			Atg16l1			protein_coding
Sox9_E16_Sample1_peak_1550	chr1	87852936	87854152	+	455	NA	exon (ENSMUST00000187511.1, exon 2 of 2)	lncRNA-exon (ENSMUST00000187511.1, exon 2 of 2)	257	ENSMUST00000027517.13	ENSMUSG00000070738	ENSMUST00000190243			Dgkd			protein_coding
Sox9_E16_Sample1_peak_1551	chr1	87879077	87880426	+	209	NA	promoter-TSS (ENSMUST00000190243.1)	protein_coding-promoter-TSS (ENSMUST00000190243.1)	-684	ENSMUST00000190243.1	ENSMUSG00000070738	ENSMUST00000190243			Dgkd			protein_coding
Sox9_E16_Sample1_peak_1552	chr1	88008003	88008648	+	496	NA	promoter-TSS (ENSMUST00000187871.1)	protein_coding-promoter-TSS (ENSMUST00000187871.1)	-96	ENSMUST00000187871.1	ENSMUSG00000005501	ENSMUST00000190446			Usp40			protein_coding
Sox9_E16_Sample1_peak_1553	chr1	88025422	88025775	+	58	NA	exon (ENSMUST00000119510.1, exon 1 of 1)	unprocessed_pseudogene-exon (ENSMUST00000119510.1, exon 1 of 1)	387	ENSMUST00000119510.1	ENSMUSG00000083478	ENSMUST00000119510			Gm15375			unprocessed_pseudogene
Sox9_E16_Sample1_peak_1554	chr1	88103489	88104062	+	181	NA	intron (ENSMUST00000113135.5, intron 1 of 5)	protein_coding-intron (ENSMUST00000058237.13, intron 1 of 4)	523	ENSMUST00000113135.5	ENSMUSG00000090124	ENSMUST00000126203			Ugt1a7c			protein_coding
Sox9_E16_Sample1_peak_1555	chr1	88134500	88135849	+	155	NA	intron (ENSMUST00000140092.7, intron 1 of 4)	protein_coding-intron (ENSMUST00000058237.13, intron 1 of 4)	292	ENSMUST00000140092.7	ENSMUSG00000054545	ENSMUST00000140092			Ugt1a6a			protein_coding
Sox9_E16_Sample1_peak_1556	chr1	88140674	88141239	+	39	NA	intron (ENSMUST00000140092.7, intron 2 of 4)	protein_coding-intron (ENSMUST00000014263.5, intron 1 of 4)	2578	ENSMUST00000014263.5	ENSMUSG00000054545	ENSMUST00000140092			Ugt1a6a			protein_coding
Sox9_E16_Sample1_peak_1557	chr1	88144175	88145060	+	39	NA	intron (ENSMUST00000140092.7, intron 2 of 4)	protein_coding-intron (ENSMUST00000014263.5, intron 1 of 4)	-1759	ENSMUST00000119681.1	ENSMUSG00000081602	ENSMUST00000119681			Gm15369			unprocessed_pseudogene
Sox9_E16_Sample1_peak_1558	chr1	88205448	88205947	+	217	NA	promoter-TSS (ENSMUST00000119972.3)	protein_coding-promoter-TSS (ENSMUST00000119972.3)	85	ENSMUST00000119972.3	ENSMUSG00000081984	ENSMUST00000119972			Dnajb3			protein_coding
Sox9_E16_Sample1_peak_1560	chr1	88276605	88278164	+	4264	NA	promoter-TSS (ENSMUST00000148138.7)	protein_coding-promoter-TSS (ENSMUST00000148138.7)	122	ENSMUST00000147393.1	ENSMUSG00000044783	ENSMUST00000054674			Hjurp			protein_coding
Sox9_E16_Sample1_peak_1562	chr1	88428295	88428905	+	126	NA	Intergenic	Intergenic	21194	ENSMUST00000189225.1	ENSMUSG00000026295	ENSMUST00000176708			Spp2			protein_coding
Sox9_E16_Sample1_peak_1563	chr1	88431366	88431752	+	38	NA	Intergenic	Intergenic	24153	ENSMUST00000189225.1	ENSMUSG00000026295	ENSMUST00000176708			Spp2			protein_coding
Sox9_E16_Sample1_peak_1564	chr1	88437200	88438375	+	429	NA	Intergenic	Intergenic	-21896	ENSMUST00000186556.1	ENSMUSG00000100908	ENSMUST00000186556			Gm28888			lncRNA
Sox9_E16_Sample1_peak_1565	chr1	88462670	88463801	+	58	NA	promoter-TSS (ENSMUST00000190783.1)	lncRNA-promoter-TSS (ENSMUST00000190783.1)	-627	ENSMUST00000190783.1	ENSMUSG00000099553	ENSMUST00000190783			Gm29538			lncRNA
Sox9_E16_Sample1_peak_1566	chr1	88475622	88476079	+	39	NA	Intergenic	Intergenic	-13242	ENSMUST00000190783.1	ENSMUSG00000099553	ENSMUST00000190783			Gm29538			lncRNA
Sox9_E16_Sample1_peak_1567	chr1	88534032	88534604	+	34	NA	Intergenic	Intergenic	-17199	ENSMUST00000189394.1	ENSMUSG00000100798	ENSMUST00000189394			Gm19589			lncRNA
Sox9_E16_Sample1_peak_1568	chr1	88559589	88560019	+	39	NA	intron (ENSMUST00000189394.1, intron 4 of 5)	lncRNA-intron (ENSMUST00000189394.1, intron 4 of 5)	8287	ENSMUST00000189394.1	ENSMUSG00000100798	ENSMUST00000189394			Gm19589			lncRNA
Sox9_E16_Sample1_peak_1569	chr1	88575963	88576430	+	64	NA	Intergenic	Intergenic	24679	ENSMUST00000189394.1	ENSMUSG00000100798	ENSMUST00000189394			Gm19589			lncRNA
Sox9_E16_Sample1_peak_1570	chr1	88577447	88577911	+	28	NA	Intergenic	Intergenic	26162	ENSMUST00000189394.1	ENSMUSG00000100798	ENSMUST00000189394			Gm19589			lncRNA
Sox9_E16_Sample1_peak_1571	chr1	88605430	88606185	+	88	NA	Intergenic	Intergenic	-47278	ENSMUST00000194311.1	ENSMUSG00000104057	ENSMUST00000194311			Gm38130			TEC
Sox9_E16_Sample1_peak_1572	chr1	88608216	88608815	+	102	NA	Intergenic	Intergenic	-44570	ENSMUST00000194311.1	ENSMUSG00000104057	ENSMUST00000194311			Gm38130			TEC
Sox9_E16_Sample1_peak_1573	chr1	88638843	88640237	+	130	NA	Intergenic	Intergenic	-13545	ENSMUST00000194311.1	ENSMUSG00000104057	ENSMUST00000194311			Gm38130			TEC
Sox9_E16_Sample1_peak_1574	chr1	88701527	88702489	+	330	NA	promoter-TSS (ENSMUST00000051236.10)	protein_coding-promoter-TSS (ENSMUST00000051236.10)	-132	ENSMUST00000187810.1	ENSMUSG00000049866	ENSMUST00000187810			Arl4c			protein_coding
Sox9_E16_Sample1_peak_1575	chr1	88705174	88705975	+	119	NA	Intergenic	Intergenic	-3353	ENSMUST00000159814.1	ENSMUSG00000049866	ENSMUST00000187810			Arl4c			protein_coding
Sox9_E16_Sample1_peak_1576	chr1	88800404	88801291	+	122	NA	Intergenic	Intergenic	45893	ENSMUST00000180596.1	ENSMUSG00000097398	ENSMUST00000180596			Platr5			lncRNA
Sox9_E16_Sample1_peak_1577	chr1	88877177	88878223	+	226	NA	Intergenic	Intergenic	-2290	ENSMUST00000185425.1	ENSMUSG00000099848	ENSMUST00000185425			Gm29337			lncRNA
Sox9_E16_Sample1_peak_1578	chr1	89015345	89015970	+	122	NA	promoter-TSS (ENSMUST00000186180.1)	lncRNA-promoter-TSS (ENSMUST00000186180.1)	-456	ENSMUST00000186180.1	ENSMUSG00000099378	ENSMUST00000186180			1700067G17Rik			lncRNA
Sox9_E16_Sample1_peak_1579	chr1	89069602	89071166	+	690	NA	promoter-TSS (ENSMUST00000066279.10)	protein_coding-promoter-TSS (ENSMUST00000066279.10)	-31	ENSMUST00000066279.10	ENSMUSG00000036206	ENSMUST00000123745			Sh3bp4			protein_coding
Sox9_E16_Sample1_peak_1581	chr1	89090280	89090651	+	36	NA	intron (ENSMUST00000066279.10, intron 1 of 5)	protein_coding-intron (ENSMUST00000066279.10, intron 1 of 5)	-6608	ENSMUST00000195426.1	ENSMUSG00000102700	ENSMUST00000195426			Gm38312			TEC
Sox9_E16_Sample1_peak_1582	chr1	89092410	89093020	+	108	NA	intron (ENSMUST00000066279.10, intron 1 of 5)	protein_coding-intron (ENSMUST00000066279.10, intron 1 of 5)	-4358	ENSMUST00000195426.1	ENSMUSG00000102700	ENSMUST00000195426			Gm38312			TEC
Sox9_E16_Sample1_peak_1583	chr1	89104009	89104765	+	290	NA	intron (ENSMUST00000066279.10, intron 1 of 5)	protein_coding-intron (ENSMUST00000066279.10, intron 1 of 5)	7314	ENSMUST00000195426.1	ENSMUSG00000102700	ENSMUST00000195426			Gm38312			TEC
Sox9_E16_Sample1_peak_1584	chr1	89111004	89111385	+	39	NA	intron (ENSMUST00000066279.10, intron 2 of 5)	protein_coding-intron (ENSMUST00000066279.10, intron 2 of 5)	14121	ENSMUST00000195426.1	ENSMUSG00000102700	ENSMUST00000195426			Gm38312			TEC
Sox9_E16_Sample1_peak_1585	chr1	89121336	89121911	+	93	NA	intron (ENSMUST00000066279.10, intron 2 of 5)	protein_coding-intron (ENSMUST00000066279.10, intron 2 of 5)	24550	ENSMUST00000195426.1	ENSMUSG00000102700	ENSMUST00000195426			Gm38312			TEC
Sox9_E16_Sample1_peak_1586	chr1	89123984	89124475	+	87	NA	intron (ENSMUST00000066279.10, intron 2 of 5)	protein_coding-intron (ENSMUST00000066279.10, intron 2 of 5)	27156	ENSMUST00000195426.1	ENSMUSG00000102700	ENSMUST00000195426			Gm38312			TEC
Sox9_E16_Sample1_peak_1588	chr1	89165074	89166130	+	107	NA	Intergenic	Intergenic	68529	ENSMUST00000195426.1	ENSMUSG00000102700	ENSMUST00000195426			Gm38312			TEC
Sox9_E16_Sample1_peak_1589	chr1	89191240	89191873	+	420	NA	Intergenic	Intergenic	65425	ENSMUST00000191231.1	ENSMUSG00000102083	ENSMUST00000191231			Gm5259			processed_pseudogene
Sox9_E16_Sample1_peak_1590	chr1	89454091	89455110	+	491	NA	promoter-TSS (ENSMUST00000027521.14)	protein_coding-promoter-TSS (ENSMUST00000027521.14)	-206	ENSMUST00000027521.14	ENSMUSG00000055013	ENSMUST00000212924			Agap1			protein_coding
Sox9_E16_Sample1_peak_1591	chr1	89494752	89495438	+	99	NA	intron (ENSMUST00000190096.6, intron 1 of 16)	protein_coding-intron (ENSMUST00000027521.14, intron 1 of 17)	11657	ENSMUST00000192974.1	ENSMUSG00000104114	ENSMUST00000192974			Gm37297			TEC
Sox9_E16_Sample1_peak_1592	chr1	89516125	89517875	+	113	NA	intron (ENSMUST00000190096.6, intron 1 of 16)	protein_coding-intron (ENSMUST00000027521.14, intron 1 of 17)	33562	ENSMUST00000192974.1	ENSMUSG00000104114	ENSMUST00000192974			Gm37297			TEC
Sox9_E16_Sample1_peak_1593	chr1	89580072	89581505	+	306	NA	exon (ENSMUST00000074945.7, exon 1 of 18)	protein_coding-exon (ENSMUST00000074945.7, exon 1 of 18)	552	ENSMUST00000074945.7	ENSMUSG00000055013	ENSMUST00000212924			Agap1			protein_coding
Sox9_E16_Sample1_peak_1594	chr1	89673239	89673818	+	107	NA	intron (ENSMUST00000190096.6, intron 9 of 16)	protein_coding-intron (ENSMUST00000027521.14, intron 9 of 17)	10360	ENSMUST00000187011.1	ENSMUSG00000102009	ENSMUST00000186098			4933400F21Rik			lncRNA
Sox9_E16_Sample1_peak_1596	chr1	89716346	89717424	+	66	NA	intron (ENSMUST00000190096.6, intron 9 of 16)	protein_coding-intron (ENSMUST00000027521.14, intron 9 of 17)	32083	ENSMUST00000158150.1	ENSMUSG00000088775	ENSMUST00000158150			Gm26037			misc_RNA
Sox9_E16_Sample1_peak_1597	chr1	89718189	89719279	+	178	NA	intron (ENSMUST00000190096.6, intron 9 of 16)	protein_coding-intron (ENSMUST00000027521.14, intron 9 of 17)	33932	ENSMUST00000158150.1	ENSMUSG00000088775	ENSMUST00000158150			Gm26037			misc_RNA
Sox9_E16_Sample1_peak_1598	chr1	89930343	89931555	+	56	NA	exon (ENSMUST00000036954.8, exon 1 of 2)	protein_coding-exon (ENSMUST00000036954.8, exon 1 of 2)	230	ENSMUST00000036954.8	ENSMUSG00000034486	ENSMUST00000036954			Gbx2			protein_coding
Sox9_E16_Sample1_peak_1599	chr1	89940204	89940633	+	85	NA	Intergenic	Intergenic	-9239	ENSMUST00000036954.8	ENSMUSG00000034486	ENSMUST00000036954			Gbx2			protein_coding
Sox9_E16_Sample1_peak_1601	chr1	90202409	90204081	+	158	NA	promoter-TSS (ENSMUST00000065587.4)	protein_coding-promoter-TSS (ENSMUST00000065587.4)	-735	ENSMUST00000065587.4	ENSMUSG00000044337	ENSMUST00000159654			Ackr3			protein_coding
Sox9_E16_Sample1_peak_1602	chr1	90297577	90298326	+	181	NA	Intergenic	Intergenic	17493	ENSMUST00000188640.1	ENSMUSG00000101028	ENSMUST00000188640			Gm28723			lncRNA
Sox9_E16_Sample1_peak_1603	chr1	90446582	90447754	+	34	NA	Intergenic	Intergenic	7333	ENSMUST00000187630.1	ENSMUSG00000101997	ENSMUST00000187630			Gm28722			lncRNA
Sox9_E16_Sample1_peak_1605	chr1	90603090	90603793	+	189	NA	promoter-TSS (ENSMUST00000186152.6)	protein_coding-promoter-TSS (ENSMUST00000186152.6)	-35	ENSMUST00000191510.6	ENSMUSG00000034432	ENSMUST00000186152			Cops8			protein_coding
Sox9_E16_Sample1_peak_1607	chr1	90896708	90897360	+	181	NA	Intergenic	Intergenic	-18051	ENSMUST00000027528.6	ENSMUSG00000026303	ENSMUST00000125149			Mlph			protein_coding
Sox9_E16_Sample1_peak_1608	chr1	90914836	90915579	+	372	NA	exon (ENSMUST00000027528.6, exon 1 of 16)	protein_coding-exon (ENSMUST00000027528.6, exon 1 of 16)	122	ENSMUST00000027528.6	ENSMUSG00000026303	ENSMUST00000125149			Mlph			protein_coding
Sox9_E16_Sample1_peak_1609	chr1	90927371	90928761	+	256	NA	exon (ENSMUST00000027528.6, exon 3 of 16)	protein_coding-exon (ENSMUST00000027528.6, exon 3 of 16)	387	ENSMUST00000125149.1	ENSMUSG00000026303	ENSMUST00000125149			Mlph			protein_coding
Sox9_E16_Sample1_peak_1610	chr1	90962618	90963398	+	223	NA	intron (ENSMUST00000128226.7, intron 1 of 4)	protein_coding-intron (ENSMUST00000027529.11, intron 2 of 5)	4609	ENSMUST00000135819.1	ENSMUSG00000026304	ENSMUST00000128226			Rab17			protein_coding
Sox9_E16_Sample1_peak_1611	chr1	90969270	90970125	+	191	NA	promoter-TSS (ENSMUST00000027529.11)	protein_coding-promoter-TSS (ENSMUST00000027529.11)	-36	ENSMUST00000027529.11	ENSMUSG00000026304	ENSMUST00000128226			Rab17			protein_coding
Sox9_E16_Sample1_peak_1612	chr1	90998440	90999393	+	267	NA	intron (ENSMUST00000189505.6, intron 1 of 12)	protein_coding-intron (ENSMUST00000068116.12, intron 1 of 12)	137	ENSMUST00000068116.12	ENSMUSG00000026305	ENSMUST00000068167			Lrrfip1			protein_coding
Sox9_E16_Sample1_peak_1613	chr1	91043863	91045044	+	249	NA	intron (ENSMUST00000189505.6, intron 1 of 12)	protein_coding-intron (ENSMUST00000068116.12, intron 1 of 12)	-8991	ENSMUST00000068167.12	ENSMUSG00000026305	ENSMUST00000068167			Lrrfip1			protein_coding
Sox9_E16_Sample1_peak_1614	chr1	91052618	91055270	+	388	NA	intron (ENSMUST00000097649.9, intron 1 of 7)	protein_coding-intron (ENSMUST00000068116.12, intron 1 of 12)	358	ENSMUST00000189617.2	ENSMUSG00000026305	ENSMUST00000068167			Lrrfip1			protein_coding
Sox9_E16_Sample1_peak_1615	chr1	91077495	91078450	+	58	NA	intron (ENSMUST00000097650.9, intron 4 of 22)	protein_coding-intron (ENSMUST00000068116.12, intron 2 of 12)	24386	ENSMUST00000189617.2	ENSMUSG00000026305	ENSMUST00000068167			Lrrfip1			protein_coding
Sox9_E16_Sample1_peak_1616	chr1	91086454	91087158	+	85	NA	intron (ENSMUST00000186762.6, intron 3 of 4)	protein_coding-intron (ENSMUST00000068116.12, intron 2 of 12)	-24408	ENSMUST00000188094.6	ENSMUSG00000026305	ENSMUST00000068167			Lrrfip1			protein_coding
Sox9_E16_Sample1_peak_1617	chr1	91179249	91180283	+	167	NA	promoter-TSS (ENSMUST00000097648.5)	protein_coding-promoter-TSS (ENSMUST00000097648.5)	-56	ENSMUST00000165855.7	ENSMUSG00000034353	ENSMUST00000165855			Ramp1			protein_coding
Sox9_E16_Sample1_peak_1618	chr1	91249727	91250899	+	531	NA	promoter-TSS (ENSMUST00000059743.11)	protein_coding-promoter-TSS (ENSMUST00000059743.11)	2	ENSMUST00000059743.11	ENSMUSG00000034343	ENSMUST00000178627			Ube2f			protein_coding
Sox9_E16_Sample1_peak_1619	chr1	91297782	91298904	+	432	NA	promoter-TSS (ENSMUST00000027532.12)	protein_coding-promoter-TSS (ENSMUST00000027532.12)	5	ENSMUST00000027532.12	ENSMUSG00000026307	ENSMUST00000142802			Scly			protein_coding
Sox9_E16_Sample1_peak_1620	chr1	91321756	91322330	+	99	NA	promoter-TSS (ENSMUST00000088904.9)	protein_coding-promoter-TSS (ENSMUST00000088904.9)	-32	ENSMUST00000088904.9	ENSMUSG00000049515	ENSMUST00000088904			Espnl			protein_coding
Sox9_E16_Sample1_peak_1621	chr1	91345101	91345602	+	28	NA	exon (ENSMUST00000088904.9, exon 9 of 9)	protein_coding-exon (ENSMUST00000088904.9, exon 9 of 9)	-5665	ENSMUST00000027533.8	ENSMUSG00000026308	ENSMUST00000027533			Klhl30			protein_coding
Sox9_E16_Sample1_peak_1622	chr1	91366134	91367122	+	522	NA	exon (ENSMUST00000086861.11, exon 1 of 8)	protein_coding-exon (ENSMUST00000086861.11, exon 1 of 8)	198	ENSMUST00000086861.11	ENSMUSG00000047443	ENSMUST00000086861			Erfe			protein_coding
Sox9_E16_Sample1_peak_1623	chr1	91398168	91399091	+	382	NA	promoter-TSS (ENSMUST00000187049.6)	protein_coding-promoter-TSS (ENSMUST00000187049.6)	71	ENSMUST00000187049.6	ENSMUSG00000026309	ENSMUST00000186433			Ilkap			protein_coding
Sox9_E16_Sample1_peak_1624	chr1	91405232	91406061	+	78	NA	intron (ENSMUST00000188956.1, intron 1 of 2)	lncRNA-intron (ENSMUST00000188956.1, intron 1 of 2)	383	ENSMUST00000188956.1	ENSMUSG00000100253	ENSMUST00000188956			1700020N18Rik			lncRNA
Sox9_E16_Sample1_peak_1625	chr1	91412588	91414517	+	473	NA	promoter-TSS (ENSMUST00000086851.1)	protein_coding-promoter-TSS (ENSMUST00000086851.1)	-330	ENSMUST00000086851.1	ENSMUSG00000067071	ENSMUST00000155752			Hes6			protein_coding
Sox9_E16_Sample1_peak_1626	chr1	91436401	91436968	+	181	NA	intron (ENSMUST00000069620.9, intron 9 of 22)	protein_coding-intron (ENSMUST00000069620.9, intron 9 of 22)	13181	ENSMUST00000185298.1	ENSMUSG00000055866	ENSMUST00000185298			Per2			protein_coding
Sox9_E16_Sample1_peak_1627	chr1	91442302	91443131	+	130	NA	intron (ENSMUST00000069620.9, intron 6 of 22)	protein_coding-intron (ENSMUST00000069620.9, intron 6 of 22)	7149	ENSMUST00000185298.1	ENSMUSG00000055866	ENSMUST00000185298			Per2			protein_coding
Sox9_E16_Sample1_peak_1628	chr1	91448612	91449289	+	208	NA	intron (ENSMUST00000069620.9, intron 3 of 22)	protein_coding-intron (ENSMUST00000069620.9, intron 3 of 22)	915	ENSMUST00000185298.1	ENSMUSG00000055866	ENSMUST00000185298			Per2			protein_coding
Sox9_E16_Sample1_peak_1630	chr1	91458085	91459809	+	436	NA	intron (ENSMUST00000069620.9, intron 1 of 22)	protein_coding-intron (ENSMUST00000069620.9, intron 1 of 22)	377	ENSMUST00000069620.9	ENSMUSG00000055866	ENSMUST00000185298			Per2			protein_coding
Sox9_E16_Sample1_peak_1631	chr1	91464867	91465856	+	114	NA	Intergenic	Intergenic	4737	ENSMUST00000188403.1	ENSMUSG00000101911	ENSMUST00000188403			Gm28381			processed_pseudogene
Sox9_E16_Sample1_peak_1633	chr1	91494182	91495183	+	365	NA	promoter-TSS (ENSMUST00000047242.8)	protein_coding-promoter-TSS (ENSMUST00000047242.8)	-12	ENSMUST00000047242.8	ENSMUSG00000034292	ENSMUST00000047242			Traf3ip1			protein_coding
Sox9_E16_Sample1_peak_1634	chr1	91539799	91540993	+	425	NA	promoter-TSS (ENSMUST00000027538.8)	protein_coding-promoter-TSS (ENSMUST00000027538.8)	-148	ENSMUST00000086843.10	ENSMUSG00000026311	ENSMUST00000186068			Asb1			protein_coding
Sox9_E16_Sample1_peak_1635	chr1	91611147	91611950	+	75	NA	intron (ENSMUST00000188800.1, intron 1 of 2)	lncRNA-intron (ENSMUST00000188800.1, intron 1 of 2)	142	ENSMUST00000188800.1	ENSMUSG00000101705	ENSMUST00000188800			Gm28380			lncRNA
Sox9_E16_Sample1_peak_1638	chr1	91732569	91733157	+	78	NA	Intergenic	Intergenic	-68598	ENSMUST00000007949.3	ENSMUSG00000007805	ENSMUST00000007949			Twist2			protein_coding
Sox9_E16_Sample1_peak_1640	chr1	91770508	91771463	+	45	NA	Intergenic	Intergenic	-30476	ENSMUST00000007949.3	ENSMUSG00000007805	ENSMUST00000007949			Twist2			protein_coding
Sox9_E16_Sample1_peak_1641	chr1	91844801	91845752	+	51	NA	intron (ENSMUST00000007949.3, intron 1 of 1)	protein_coding-intron (ENSMUST00000007949.3, intron 1 of 1)	22761	ENSMUST00000188329.1	ENSMUSG00000101414	ENSMUST00000188329			Gm29101			lncRNA
Sox9_E16_Sample1_peak_1642	chr1	91872279	91872892	+	138	NA	Intergenic	Intergenic	-43675	ENSMUST00000193764.1	ENSMUSG00000102745	ENSMUST00000193764			Gm37600			TEC
Sox9_E16_Sample1_peak_1643	chr1	91928357	91929508	+	402	NA	exon (ENSMUST00000097644.8, exon 27 of 27)	protein_coding-exon (ENSMUST00000097644.8, exon 27 of 27)	5932	ENSMUST00000191327.1	ENSMUSG00000026313	ENSMUST00000191327			Hdac4			protein_coding
Sox9_E16_Sample1_peak_1644	chr1	91933446	91933863	+	21	NA	intron (ENSMUST00000097644.8, intron 26 of 26)	protein_coding-intron (ENSMUST00000008995.14, intron 25 of 25)	1210	ENSMUST00000191327.1	ENSMUSG00000026313	ENSMUST00000191327			Hdac4			protein_coding
Sox9_E16_Sample1_peak_1645	chr1	92030441	92030836	+	18	NA	intron (ENSMUST00000212408.1, intron 3 of 3)	protein_coding-intron (ENSMUST00000008995.14, intron 2 of 25)	-8541	ENSMUST00000192836.1	ENSMUSG00000102565	ENSMUST00000192836			Gm37036			TEC
Sox9_E16_Sample1_peak_1646	chr1	92051574	92052416	+	292	NA	intron (ENSMUST00000212408.1, intron 3 of 3)	protein_coding-intron (ENSMUST00000008995.14, intron 2 of 25)	-29898	ENSMUST00000192836.1	ENSMUSG00000102565	ENSMUST00000192836			Gm37036			TEC
Sox9_E16_Sample1_peak_1647	chr1	92179792	92181124	+	921	NA	promoter-TSS (ENSMUST00000097644.8)	protein_coding-promoter-TSS (ENSMUST00000097644.8)	-117	ENSMUST00000097644.8	ENSMUSG00000026313	ENSMUST00000191327			Hdac4			protein_coding
Sox9_E16_Sample1_peak_1649	chr1	92329797	92330279	+	39	NA	TTS (ENSMUST00000187370.1)	lncRNA-TTS (ENSMUST00000187370.1)	5528	ENSMUST00000187370.1	ENSMUSG00000101265	ENSMUST00000187370			Gm29099			lncRNA
Sox9_E16_Sample1_peak_1650	chr1	92437661	92438709	+	396	NA	TTS (ENSMUST00000027478.6)	protein_coding-TTS (ENSMUST00000027478.6)	-7653	ENSMUST00000190873.1	ENSMUSG00000101522	ENSMUST00000190873			Gm7837			processed_pseudogene
Sox9_E16_Sample1_peak_1651	chr1	92473347	92474460	+	273	NA	promoter-TSS (ENSMUST00000027478.6)	protein_coding-promoter-TSS (ENSMUST00000027478.6)	-43	ENSMUST00000027478.6	ENSMUSG00000026260	ENSMUST00000153897			Ndufa10			protein_coding
Sox9_E16_Sample1_peak_1652	chr1	92641491	92642482	+	298	NA	promoter-TSS (ENSMUST00000097642.3)	protein_coding-promoter-TSS (ENSMUST00000097642.3)	-1	ENSMUST00000097642.3	ENSMUSG00000073616	ENSMUST00000097642			Cops9			protein_coding
Sox9_E16_Sample1_peak_1653	chr1	92647718	92648887	+	51	NA	promoter-TSS (ENSMUST00000159803.1)	protein_coding-promoter-TSS (ENSMUST00000159803.1)	-48	ENSMUST00000159803.1	ENSMUSG00000044055	ENSMUST00000053144			Otos			protein_coding
Sox9_E16_Sample1_peak_1654	chr1	92774543	92775344	+	147	NA	Intergenic	Intergenic	-14463	ENSMUST00000187845.1	ENSMUSG00000099665	ENSMUST00000187845			Gm29482			lncRNA
Sox9_E16_Sample1_peak_1655	chr1	92790714	92791718	+	170	NA	Intergenic	Intergenic	-30736	ENSMUST00000187845.1	ENSMUSG00000099665	ENSMUST00000187845			Gm29482			lncRNA
Sox9_E16_Sample1_peak_1656	chr1	92831228	92832874	+	524	NA	promoter-TSS (ENSMUST00000191373.1)	protein_coding-promoter-TSS (ENSMUST00000191373.1)	82	ENSMUST00000191373.1	ENSMUSG00000034220	ENSMUST00000190586			Gpc1			protein_coding
Sox9_E16_Sample1_peak_1657	chr1	92906915	92907659	+	640	NA	exon (ENSMUST00000060913.7, exon 1 of 2)	protein_coding-exon (ENSMUST00000060913.7, exon 1 of 2)	306	ENSMUST00000060913.7	ENSMUSG00000047067	ENSMUST00000060913			Dusp28			protein_coding
Sox9_E16_Sample1_peak_1658	chr1	92910504	92911454	+	397	NA	promoter-TSS (ENSMUST00000178116.7)	protein_coding-promoter-TSS (ENSMUST00000178116.7)	126	ENSMUST00000180306.1	ENSMUSG00000026269	ENSMUST00000178116			Rnpepl1			protein_coding
Sox9_E16_Sample1_peak_1659	chr1	92934109	92935360	+	1338	NA	promoter-TSS (ENSMUST00000117814.7)	protein_coding-promoter-TSS (ENSMUST00000117814.7)	-32	ENSMUST00000117814.7	ENSMUSG00000026270	ENSMUST00000136598			Capn10			protein_coding
Sox9_E16_Sample1_peak_1660	chr1	92972998	92973482	+	57	NA	exon (ENSMUST00000027489.8, exon 1 of 2)	protein_coding-exon (ENSMUST00000027489.8, exon 1 of 2)	118	ENSMUST00000186298.6	ENSMUSG00000026271	ENSMUST00000185421			Gpr35			protein_coding
Sox9_E16_Sample1_peak_1661	chr1	92975915	92976594	+	85	NA	intron (ENSMUST00000064480.6, intron 1 of 1)	protein_coding-intron (ENSMUST00000027489.8, intron 1 of 1)	907	ENSMUST00000064480.6	ENSMUSG00000026271	ENSMUST00000185421			Gpr35			protein_coding
Sox9_E16_Sample1_peak_1662	chr1	92978758	92979355	+	47	NA	exon (ENSMUST00000169198.2, exon 1 of 2)	protein_coding-exon (ENSMUST00000169198.2, exon 1 of 2)	134	ENSMUST00000169198.2	ENSMUSG00000026271	ENSMUST00000185421			Gpr35			protein_coding
Sox9_E16_Sample1_peak_1663	chr1	93063290	93064479	+	403	NA	intron (ENSMUST00000171796.7, intron 14 of 47)	protein_coding-intron (ENSMUST00000086819.11, intron 14 of 46)	4874	ENSMUST00000190249.1	ENSMUSG00000014602	ENSMUST00000188493			Kif1a			protein_coding
Sox9_E16_Sample1_peak_1664	chr1	93100342	93102053	+	132	NA	intron (ENSMUST00000186861.1, intron 1 of 4)	protein_coding-intron (ENSMUST00000186861.1, intron 1 of 4)	625	ENSMUST00000171796.7	ENSMUSG00000014602	ENSMUST00000188493			Kif1a			protein_coding
Sox9_E16_Sample1_peak_1665	chr1	93114942	93115721	+	274	NA	Intergenic	Intergenic	8772	ENSMUST00000191586.1	ENSMUSG00000101378	ENSMUST00000191586			Gm28086			lncRNA
Sox9_E16_Sample1_peak_1666	chr1	93130021	93130976	+	489	NA	Intergenic	Intergenic	-4742	ENSMUST00000027491.6	ENSMUSG00000026272	ENSMUST00000027491			Agxt			protein_coding
Sox9_E16_Sample1_peak_1667	chr1	93159870	93162266	+	273	NA	promoter-TSS (ENSMUST00000043718.11)	protein_coding-promoter-TSS (ENSMUST00000043718.11)	-120	ENSMUST00000043718.11	ENSMUSG00000034159	ENSMUST00000143419			Mab21l4			protein_coding
Sox9_E16_Sample1_peak_1668	chr1	93168199	93168968	+	211	NA	promoter-TSS (ENSMUST00000138595.2)	protein_coding-promoter-TSS (ENSMUST00000138595.2)	-142	ENSMUST00000138595.2	ENSMUSG00000084989	ENSMUST00000138595			Crocc2			protein_coding
Sox9_E16_Sample1_peak_1669	chr1	93176451	93177132	+	78	NA	intron (ENSMUST00000138595.2, intron 1 of 31)	protein_coding-intron (ENSMUST00000138595.2, intron 1 of 31)	8066	ENSMUST00000138595.2	ENSMUSG00000084989	ENSMUST00000138595			Crocc2			protein_coding
Sox9_E16_Sample1_peak_1672	chr1	93235509	93236734	+	592	NA	exon (ENSMUST00000062202.13, exon 1 of 31)	protein_coding-exon (ENSMUST00000062202.13, exon 1 of 31)	270	ENSMUST00000172289.7	ENSMUSG00000047793	ENSMUST00000062202			Sned1			protein_coding
Sox9_E16_Sample1_peak_1673	chr1	93305521	93306141	+	283	NA	promoter-TSS (ENSMUST00000027492.13)	protein_coding-promoter-TSS (ENSMUST00000027492.13)	32	ENSMUST00000112944.7	ENSMUSG00000026273	ENSMUST00000152307			Mterf4			protein_coding
Sox9_E16_Sample1_peak_1674	chr1	93342573	93343902	+	1337	NA	promoter-TSS (ENSMUST00000027493.3)	protein_coding-promoter-TSS (ENSMUST00000027493.3)	228	ENSMUST00000139028.1	ENSMUSG00000026274	ENSMUST00000027493			Pask			protein_coding
Sox9_E16_Sample1_peak_1675	chr1	93401504	93401932	+	44	NA	promoter-TSS (ENSMUST00000190340.1)	protein_coding-promoter-TSS (ENSMUST00000190340.1)	-143	ENSMUST00000190340.1	ENSMUSG00000034107	ENSMUST00000186641			Ano7			protein_coding
Sox9_E16_Sample1_peak_1677	chr1	93444625	93446122	+	704	NA	promoter-TSS (ENSMUST00000186787.6)	protein_coding-promoter-TSS (ENSMUST00000186787.6)	59	ENSMUST00000186787.6	ENSMUSG00000034088	ENSMUST00000186164			Hdlbp			protein_coding
Sox9_E16_Sample1_peak_1678	chr1	93477975	93479610	+	1352	NA	promoter-TSS (ENSMUST00000027495.14)	protein_coding-promoter-TSS (ENSMUST00000027495.14)	9	ENSMUST00000170883.7	ENSMUSG00000034088	ENSMUST00000186164			Hdlbp			protein_coding
Sox9_E16_Sample1_peak_1679	chr1	93511449	93512552	+	1404	NA	promoter-TSS (ENSMUST00000120301.7)	protein_coding-promoter-TSS (ENSMUST00000120301.7)	-79	ENSMUST00000120301.7	ENSMUSG00000034066	ENSMUST00000120301			Farp2			protein_coding
Sox9_E16_Sample1_peak_1680	chr1	93634878	93636348	+	1507	NA	promoter-TSS (ENSMUST00000133769.7)	protein_coding-promoter-TSS (ENSMUST00000133769.7)	16	ENSMUST00000151068.7	ENSMUSG00000026277	ENSMUST00000027498			Stk25			protein_coding
Sox9_E16_Sample1_peak_1681	chr1	93667956	93669361	+	607	NA	Intergenic	Intergenic	-9999	ENSMUST00000186287.2	ENSMUSG00000026277	ENSMUST00000027498			Stk25			protein_coding
Sox9_E16_Sample1_peak_1682	chr1	93685469	93686921	+	576	NA	promoter-TSS (ENSMUST00000188394.1)	protein_coding-promoter-TSS (ENSMUST00000188394.1)	-68	ENSMUST00000188394.1	ENSMUSG00000026278	ENSMUST00000188394			Bok			protein_coding
Sox9_E16_Sample1_peak_1684	chr1	93727221	93727635	+	58	NA	intron (ENSMUST00000112905.3, intron 2 of 5)	protein_coding-intron (ENSMUST00000112905.3, intron 2 of 5)	-3676	ENSMUST00000188846.1	ENSMUSG00000101952	ENSMUST00000188846			Gm10550			lncRNA
Sox9_E16_Sample1_peak_1685	chr1	93753981	93755421	+	787	NA	promoter-TSS (ENSMUST00000027502.15)	protein_coding-promoter-TSS (ENSMUST00000027502.15)	-51	ENSMUST00000189173.1	ENSMUSG00000026279	ENSMUST00000187445			Thap4			protein_coding
Sox9_E16_Sample1_peak_1686	chr1	93801713	93802220	+	87	NA	promoter-TSS (ENSMUST00000027503.13)	protein_coding-promoter-TSS (ENSMUST00000027503.13)	-32	ENSMUST00000027503.13	ENSMUSG00000026281	ENSMUST00000112890			Dtymk			protein_coding
Sox9_E16_Sample1_peak_1687	chr1	93803545	93804605	+	2129	NA	promoter-TSS (ENSMUST00000188402.1)	protein_coding-promoter-TSS (ENSMUST00000188402.1)	92	ENSMUST00000188402.1	ENSMUSG00000026283	ENSMUST00000190476			Ing5			protein_coding
Sox9_E16_Sample1_peak_1688	chr1	93824768	93826000	+	1240	NA	promoter-TSS (ENSMUST00000149397.7)	protein_coding-promoter-TSS (ENSMUST00000149397.7)	110	ENSMUST00000112881.7	ENSMUSG00000073609	ENSMUST00000112881			D2hgdh			protein_coding
Sox9_E16_Sample1_peak_1689	chr1	93881150	93882144	+	353	NA	Intergenic	Intergenic	19821	ENSMUST00000187896.1	ENSMUSG00000094651	ENSMUST00000190710			Gal3st2			protein_coding
Sox9_E16_Sample1_peak_1691	chr1	93948487	93949434	+	282	NA	Intergenic	Intergenic	20923	ENSMUST00000177958.1	ENSMUSG00000093805	ENSMUST00000177958			Gal3st2b			protein_coding
Sox9_E16_Sample1_peak_1692	chr1	94034853	94035924	+	1356	NA	Intergenic	Intergenic	14895	ENSMUST00000050890.7	ENSMUSG00000034000	ENSMUST00000190212			Neu4			protein_coding
Sox9_E16_Sample1_peak_1693	chr1	94079029	94079733	+	100	NA	Intergenic	Intergenic	-26828	ENSMUST00000027507.7	ENSMUSG00000026285	ENSMUST00000027507			Pdcd1			protein_coding
Sox9_E16_Sample1_peak_1697	chr1	95313299	95314500	+	2114	NA	exon (ENSMUST00000059975.7, exon 1 of 3)	protein_coding-exon (ENSMUST00000059975.7, exon 1 of 3)	271	ENSMUST00000186780.1	ENSMUSG00000051185	ENSMUST00000186780			Fam174a			protein_coding
Sox9_E16_Sample1_peak_1698	chr1	95666768	95668506	+	698	NA	promoter-TSS (ENSMUST00000043336.10)	protein_coding-promoter-TSS (ENSMUST00000043336.10)	-66	ENSMUST00000043336.10	ENSMUSG00000040710	ENSMUST00000186853			St8sia4			protein_coding
Sox9_E16_Sample1_peak_1699	chr1	96709688	96710203	+	122	NA	Intergenic	Intergenic	-47372	ENSMUST00000189056.1	ENSMUSG00000100589	ENSMUST00000189056			4930533P14Rik			lncRNA
Sox9_E16_Sample1_peak_1700	chr1	96805088	96805977	+	1325	NA	Intergenic	Intergenic	43501	ENSMUST00000104067.1	ENSMUSG00000077255	ENSMUST00000104067			Gm26078			snoRNA
Sox9_E16_Sample1_peak_1701	chr1	96848539	96849495	+	416	NA	intron (ENSMUST00000071985.5, intron 2 of 12)	protein_coding-intron (ENSMUST00000071985.5, intron 2 of 12)	-22109	ENSMUST00000188631.4	ENSMUSG00000097814	ENSMUST00000188631			Panct2			lncRNA
Sox9_E16_Sample1_peak_1702	chr1	96868526	96869202	+	286	NA	intron (ENSMUST00000071985.5, intron 1 of 12)	protein_coding-intron (ENSMUST00000071985.5, intron 1 of 12)	-2262	ENSMUST00000188631.4	ENSMUSG00000097814	ENSMUST00000188631			Panct2			lncRNA
Sox9_E16_Sample1_peak_1703	chr1	96871504	96872676	+	551	NA	promoter-TSS (ENSMUST00000071985.5)	protein_coding-promoter-TSS (ENSMUST00000071985.5)	81	ENSMUST00000071985.5	ENSMUSG00000040693	ENSMUST00000071985			Slco4c1			protein_coding
Sox9_E16_Sample1_peak_1704	chr1	96883623	96884554	+	176	NA	intron (ENSMUST00000188631.4, intron 3 of 3)	lncRNA-intron (ENSMUST00000188631.4, intron 3 of 3)	11855	ENSMUST00000202118.1	ENSMUSG00000097814	ENSMUST00000188631			Panct2			lncRNA
Sox9_E16_Sample1_peak_1705	chr1	96970271	96971023	+	64	NA	intron (ENSMUST00000178359.2, intron 4 of 11)	transcribed_unprocessed_pseudogene-intron (ENSMUST00000167383.7, intron 4 of 14)	26590	ENSMUST00000178359.2	ENSMUSG00000045463	ENSMUST00000178359			Slco6b1			transcribed_unprocessed_pseudogene
Sox9_E16_Sample1_peak_1706	chr1	97018763	97019219	+	58	NA	Intergenic	Intergenic	-5690	ENSMUST00000054664.7	ENSMUSG00000044757	ENSMUST00000054664			Gm6430			processed_pseudogene
Sox9_E16_Sample1_peak_1707	chr1	97038139	97038865	+	71	NA	Intergenic	Intergenic	-12937	ENSMUST00000188810.1	ENSMUSG00000100454	ENSMUST00000188810			Gm28901			lncRNA
Sox9_E16_Sample1_peak_1709	chr1	97660654	97662291	+	1796	NA	exon (ENSMUST00000153115.7, exon 1 of 3)	protein_coding-exon (ENSMUST00000153115.7, exon 1 of 3)	204	ENSMUST00000142234.1	ENSMUSG00000044768	ENSMUST00000149927			D1Ertd622e			protein_coding
Sox9_E16_Sample1_peak_1711	chr1	97726945	97727311	+	85	NA	intron (ENSMUST00000112845.7, intron 23 of 30)	protein_coding-intron (ENSMUST00000042509.12, intron 23 of 27)	-5821	ENSMUST00000189992.1	ENSMUSG00000040648	ENSMUST00000112845			Ppip5k2			protein_coding
Sox9_E16_Sample1_peak_1712	chr1	97769187	97770923	+	1583	NA	promoter-TSS (ENSMUST00000027571.12)	protein_coding-promoter-TSS (ENSMUST00000027571.12)	-117	ENSMUST00000112844.9	ENSMUSG00000026333	ENSMUST00000112842			Gin1			protein_coding
Sox9_E16_Sample1_peak_1713	chr1	97821685	97822545	+	115	NA	TTS (ENSMUST00000160210.1)	protein_coding-TTS (ENSMUST00000160210.1)	3870	ENSMUST00000160210.1	ENSMUSG00000026335	ENSMUST00000161567			Pam			protein_coding
Sox9_E16_Sample1_peak_1714	chr1	97916098	97916609	+	41	NA	intron (ENSMUST00000097625.9, intron 7 of 25)	protein_coding-intron (ENSMUST00000058762.14, intron 7 of 25)	-20047	ENSMUST00000158544.1	ENSMUSG00000089169	ENSMUST00000158544			Gm25413			misc_RNA
Sox9_E16_Sample1_peak_1715	chr1	97918315	97918960	+	175	NA	intron (ENSMUST00000097625.9, intron 7 of 25)	protein_coding-intron (ENSMUST00000058762.14, intron 7 of 25)	-17763	ENSMUST00000158544.1	ENSMUSG00000089169	ENSMUST00000158544			Gm25413			misc_RNA
Sox9_E16_Sample1_peak_1716	chr1	97963688	97964299	+	150	NA	intron (ENSMUST00000162426.1, intron 2 of 2)	protein_coding-intron (ENSMUST00000162426.1, intron 2 of 2)	13075	ENSMUST00000159428.7	ENSMUSG00000026335	ENSMUST00000161567			Pam			protein_coding
Sox9_E16_Sample1_peak_1717	chr1	97976576	97977385	+	616	NA	promoter-TSS (ENSMUST00000159428.7)	protein_coding-promoter-TSS (ENSMUST00000159428.7)	88	ENSMUST00000159428.7	ENSMUSG00000026335	ENSMUST00000161567			Pam			protein_coding
Sox9_E16_Sample1_peak_1718	chr1	97996580	97998543	+	192	NA	intron (ENSMUST00000097625.9, intron 1 of 25)	protein_coding-intron (ENSMUST00000058762.14, intron 1 of 25)	-20306	ENSMUST00000161567.7	ENSMUSG00000026335	ENSMUST00000161567			Pam			protein_coding
Sox9_E16_Sample1_peak_1718-2	chr1	97998916	97999718	+	192	NA	intron (ENSMUST00000097625.9, intron 1 of 25)	protein_coding-intron (ENSMUST00000058762.14, intron 1 of 25)	-22062	ENSMUST00000161567.7	ENSMUSG00000026335	ENSMUST00000161567			Pam			protein_coding
Sox9_E16_Sample1_peak_1719	chr1	98068085	98069060	+	89	NA	intron (ENSMUST00000163007.1, intron 2 of 2)	protein_coding-intron (ENSMUST00000058762.14, intron 1 of 25)	-10689	ENSMUST00000186731.1	ENSMUSG00000026335	ENSMUST00000161567			Pam			protein_coding
Sox9_E16_Sample1_peak_1721	chr1	98081519	98081837	+	31	NA	intron (ENSMUST00000163007.1, intron 1 of 2)	protein_coding-intron (ENSMUST00000163007.1, intron 1 of 2)	13943	ENSMUST00000058762.14	ENSMUSG00000026335	ENSMUST00000161567			Pam			protein_coding
Sox9_E16_Sample1_peak_1722	chr1	98094814	98096139	+	1451	NA	intron (ENSMUST00000163007.1, intron 1 of 2)	protein_coding-intron (ENSMUST00000163007.1, intron 1 of 2)	145	ENSMUST00000058762.14	ENSMUSG00000026335	ENSMUST00000161567			Pam			protein_coding
Sox9_E16_Sample1_peak_1726	chr1	98350227	98350704	+	78	NA	Intergenic	Intergenic	-70659	ENSMUST00000027575.12	ENSMUSG00000026336	ENSMUST00000162468			Slco6d1			protein_coding
Sox9_E16_Sample1_peak_1727	chr1	100231145	100232051	+	641	NA	intron (ENSMUST00000086738.9, intron 11 of 23)	protein_coding-intron (ENSMUST00000086738.9, intron 11 of 23)	-21031	ENSMUST00000185484.1	ENSMUSG00000067028	ENSMUST00000185484			Cntnap5b			protein_coding
Sox9_E16_Sample1_peak_1728	chr1	100878179	100878723	+	138	NA	Intergenic	Intergenic	16658	ENSMUST00000103851.1	ENSMUSG00000077039	ENSMUST00000103851			Gm25537			miRNA
Sox9_E16_Sample1_peak_1729	chr1	101104665	101106715	+	51	NA	Intergenic	Intergenic	-50119	ENSMUST00000187932.1	ENSMUSG00000100684	ENSMUST00000187932			Gm20268			lncRNA
Sox9_E16_Sample1_peak_1730	chr1	104768453	104770244	+	692	NA	intron (ENSMUST00000062528.8, intron 1 of 11)	protein_coding-intron (ENSMUST00000062528.8, intron 1 of 11)	819	ENSMUST00000062528.8	ENSMUSG00000050840	ENSMUST00000062528			Cdh20			protein_coding
Sox9_E16_Sample1_peak_1732	chr1	104944703	104945306	+	78	NA	intron (ENSMUST00000062528.8, intron 4 of 11)	protein_coding-intron (ENSMUST00000062528.8, intron 4 of 11)	-32671	ENSMUST00000159213.1	ENSMUSG00000089866	ENSMUST00000159213			Gm15699			lncRNA
Sox9_E16_Sample1_peak_1734	chr1	104993871	104994792	+	216	NA	exon (ENSMUST00000062528.8, exon 12 of 12)	protein_coding-exon (ENSMUST00000062528.8, exon 12 of 12)	-81998	ENSMUST00000159213.1	ENSMUSG00000089866	ENSMUST00000159213			Gm15699			lncRNA
Sox9_E16_Sample1_peak_1737	chr1	105178528	105179998	+	625	NA	Intergenic	Intergenic	62809	ENSMUST00000187882.1	ENSMUSG00000099669	ENSMUST00000187882			Gm29012			lncRNA
Sox9_E16_Sample1_peak_1738	chr1	105187815	105189284	+	628	NA	Intergenic	Intergenic	-55876	ENSMUST00000187431.1	ENSMUSG00000099702	ENSMUST00000187431			Gm29013			unprocessed_pseudogene
Sox9_E16_Sample1_peak_1739	chr1	105355684	105357115	+	695	NA	promoter-TSS (ENSMUST00000186958.1)	lncRNA-promoter-TSS (ENSMUST00000186958.1)	271	ENSMUST00000058688.6	ENSMUSG00000047496	ENSMUST00000172299			Rnf152			protein_coding
Sox9_E16_Sample1_peak_1740	chr1	105663158	105664642	+	1303	NA	promoter-TSS (ENSMUST00000039173.12)	protein_coding-promoter-TSS (ENSMUST00000039173.12)	-13	ENSMUST00000086721.9	ENSMUSG00000026319	ENSMUST00000086721			Relch			protein_coding
Sox9_E16_Sample1_peak_1741	chr1	105770519	105771305	+	144	NA	Intergenic	Intergenic	6468	ENSMUST00000188288.1	ENSMUSG00000101330	ENSMUST00000188288			Gm10193			processed_pseudogene
Sox9_E16_Sample1_peak_1743	chr1	105780213	105781273	+	429	NA	promoter-TSS (ENSMUST00000027559.7)	protein_coding-promoter-TSS (ENSMUST00000027559.7)	-7	ENSMUST00000187812.1	ENSMUSG00000026321	ENSMUST00000027559			Tnfrsf11a			protein_coding
Sox9_E16_Sample1_peak_1744	chr1	105786356	105787660	+	108	NA	intron (ENSMUST00000187812.1, intron 1 of 3)	protein_coding-intron (ENSMUST00000027559.7, intron 1 of 9)	6258	ENSMUST00000187812.1	ENSMUSG00000026321	ENSMUST00000027559			Tnfrsf11a			protein_coding
Sox9_E16_Sample1_peak_1745	chr1	105816993	105818067	+	58	NA	intron (ENSMUST00000027559.7, intron 4 of 9)	protein_coding-intron (ENSMUST00000027559.7, intron 4 of 9)	-2340	ENSMUST00000187658.1	ENSMUSG00000026321	ENSMUST00000027559			Tnfrsf11a			protein_coding
Sox9_E16_Sample1_peak_1746	chr1	105843421	105844834	+	55	NA	intron (ENSMUST00000027559.7, intron 9 of 9)	protein_coding-intron (ENSMUST00000027559.7, intron 9 of 9)	24257	ENSMUST00000187658.1	ENSMUSG00000026321	ENSMUST00000027559			Tnfrsf11a			protein_coding
Sox9_E16_Sample1_peak_1747	chr1	105866625	105867410	+	214	NA	Intergenic	Intergenic	23995	ENSMUST00000194221.1	ENSMUSG00000102690	ENSMUST00000194221			Gm37779			TEC
Sox9_E16_Sample1_peak_1748	chr1	105880328	105881461	+	543	NA	Intergenic	Intergenic	10118	ENSMUST00000194221.1	ENSMUSG00000102690	ENSMUST00000194221			Gm37779			TEC
Sox9_E16_Sample1_peak_1751	chr1	105989831	105991772	+	953	NA	promoter-TSS (ENSMUST00000185535.1)	lncRNA-promoter-TSS (ENSMUST00000185535.1)	112	ENSMUST00000119166.7	ENSMUSG00000038866	ENSMUST00000119166			Zcchc2			protein_coding
Sox9_E16_Sample1_peak_1753	chr1	106071040	106072213	+	124	NA	TTS (ENSMUST00000193577.1)	TEC-TTS (ENSMUST00000193577.1)	4268	ENSMUST00000193577.1	ENSMUSG00000102501	ENSMUST00000193577			Gm37372			TEC
Sox9_E16_Sample1_peak_1755	chr1	106171076	106173291	+	1198	NA	promoter-TSS (ENSMUST00000190105.1)	lncRNA-promoter-TSS (ENSMUST00000190105.1)	431	ENSMUST00000061047.6	ENSMUSG00000044340	ENSMUST00000135810			Phlpp1			protein_coding
Sox9_E16_Sample1_peak_1757	chr1	106204398	106204778	+	61	NA	intron (ENSMUST00000061047.6, intron 1 of 16)	protein_coding-intron (ENSMUST00000061047.6, intron 1 of 16)	-14726	ENSMUST00000194600.1	ENSMUSG00000103291	ENSMUST00000194600			Gm38235			TEC
Sox9_E16_Sample1_peak_1758	chr1	106230214	106230628	+	64	NA	intron (ENSMUST00000061047.6, intron 1 of 16)	protein_coding-intron (ENSMUST00000061047.6, intron 1 of 16)	11107	ENSMUST00000194600.1	ENSMUSG00000103291	ENSMUST00000194600			Gm38235			TEC
Sox9_E16_Sample1_peak_1759	chr1	106236644	106237494	+	173	NA	intron (ENSMUST00000061047.6, intron 1 of 16)	protein_coding-intron (ENSMUST00000061047.6, intron 1 of 16)	17755	ENSMUST00000194600.1	ENSMUSG00000103291	ENSMUST00000194600			Gm38235			TEC
Sox9_E16_Sample1_peak_1760	chr1	106240353	106241277	+	104	NA	intron (ENSMUST00000061047.6, intron 1 of 16)	protein_coding-intron (ENSMUST00000061047.6, intron 1 of 16)	21501	ENSMUST00000194600.1	ENSMUSG00000103291	ENSMUST00000194600			Gm38235			TEC
Sox9_E16_Sample1_peak_1764	chr1	106380224	106381100	+	78	NA	intron (ENSMUST00000061047.6, intron 14 of 16)	protein_coding-intron (ENSMUST00000061047.6, intron 14 of 16)	21325	ENSMUST00000187918.1	ENSMUSG00000100247	ENSMUST00000187918			A530053M12Rik			lncRNA
Sox9_E16_Sample1_peak_1765	chr1	106389544	106389932	+	39	NA	exon (ENSMUST00000061047.6, exon 16 of 17)	protein_coding-exon (ENSMUST00000061047.6, exon 16 of 17)	12249	ENSMUST00000187918.1	ENSMUSG00000100247	ENSMUST00000187918			A530053M12Rik			lncRNA
Sox9_E16_Sample1_peak_1767	chr1	106407651	106408481	+	115	NA	Intergenic	Intergenic	-6079	ENSMUST00000187918.1	ENSMUSG00000100247	ENSMUST00000187918			A530053M12Rik			lncRNA
Sox9_E16_Sample1_peak_1769	chr1	106449526	106450340	+	130	NA	Intergenic	Intergenic	10333	ENSMUST00000189471.1	ENSMUSG00000099604	ENSMUST00000189471			Gm6651			processed_pseudogene
Sox9_E16_Sample1_peak_1770	chr1	106517313	106518067	+	64	NA	Intergenic	Intergenic	-24253	ENSMUST00000149909.1	ENSMUSG00000054006	ENSMUST00000149909			D630008O14Rik			lncRNA
Sox9_E16_Sample1_peak_1771	chr1	106566238	106566817	+	51	NA	intron (ENSMUST00000112751.1, intron 1 of 1)	protein_coding-intron (ENSMUST00000112751.1, intron 1 of 1)	-19896	ENSMUST00000183743.1	ENSMUSG00000098344	ENSMUST00000183743			Mir3473f			miRNA
Sox9_E16_Sample1_peak_1772	chr1	106583359	106584270	+	94	NA	intron (ENSMUST00000112751.1, intron 1 of 1)	protein_coding-intron (ENSMUST00000112751.1, intron 1 of 1)	23056	ENSMUST00000192399.1	ENSMUSG00000103348	ENSMUST00000192399			Gm37053			TEC
Sox9_E16_Sample1_peak_1773	chr1	106591029	106591870	+	146	NA	intron (ENSMUST00000112751.1, intron 1 of 1)	protein_coding-intron (ENSMUST00000112751.1, intron 1 of 1)	15421	ENSMUST00000192399.1	ENSMUSG00000103348	ENSMUST00000192399			Gm37053			TEC
Sox9_E16_Sample1_peak_1774	chr1	106629487	106631381	+	226	NA	intron (ENSMUST00000112751.1, intron 1 of 1)	protein_coding-intron (ENSMUST00000112751.1, intron 1 of 1)	-23564	ENSMUST00000192399.1	ENSMUSG00000103348	ENSMUST00000192399			Gm37053			TEC
Sox9_E16_Sample1_peak_1775	chr1	106713598	106715009	+	713	NA	promoter-TSS (ENSMUST00000112751.1)	protein_coding-promoter-TSS (ENSMUST00000112751.1)	-29	ENSMUST00000112751.1	ENSMUSG00000057329	ENSMUST00000112751			Bcl2			protein_coding
Sox9_E16_Sample1_peak_1776	chr1	106758765	106760421	+	1955	NA	promoter-TSS (ENSMUST00000187617.1)	protein_coding-promoter-TSS (ENSMUST00000187617.1)	90	ENSMUST00000187617.1	ENSMUSG00000009905	ENSMUST00000010049			Kdsr			protein_coding
Sox9_E16_Sample1_peak_1777	chr1	106795911	106797151	+	1521	NA	promoter-TSS (ENSMUST00000126057.1)	protein_coding-promoter-TSS (ENSMUST00000126057.1)	46	ENSMUST00000126057.1	ENSMUSG00000009907	ENSMUST00000112736			Vps4b			protein_coding
Sox9_E16_Sample1_peak_1778	chr1	107000178	107001276	+	181	NA	exon (ENSMUST00000027564.7, exon 8 of 8)	protein_coding-exon (ENSMUST00000027564.7, exon 8 of 8)	19733	ENSMUST00000136766.1	ENSMUSG00000048775	ENSMUST00000027564			Serpinb13			protein_coding
Sox9_E16_Sample1_peak_1780	chr1	107243102	107243638	+	51	NA	intron (ENSMUST00000166100.1, intron 1 of 7)	protein_coding-intron (ENSMUST00000166100.1, intron 1 of 7)	10920	ENSMUST00000120323.1	ENSMUSG00000081114	ENSMUST00000120323			Gm15390			processed_pseudogene
Sox9_E16_Sample1_peak_1782	chr1	107481072	107482035	+	217	NA	Intergenic	Intergenic	-29870	ENSMUST00000009356.10	ENSMUSG00000062345	ENSMUST00000064916			Serpinb2			protein_coding
Sox9_E16_Sample1_peak_1783	chr1	107589770	107590881	+	709	NA	intron (ENSMUST00000000514.10, intron 1 of 6)	protein_coding-intron (ENSMUST00000000514.10, intron 1 of 6)	279	ENSMUST00000151283.1	ENSMUSG00000026315	ENSMUST00000112706			Serpinb8			protein_coding
Sox9_E16_Sample1_peak_1784	chr1	107607570	107608405	+	82	NA	TTS (ENSMUST00000123086.1)	protein_coding-TTS (ENSMUST00000123086.1)	2107	ENSMUST00000123086.1	ENSMUSG00000026315	ENSMUST00000112706			Serpinb8			protein_coding
Sox9_E16_Sample1_peak_1785	chr1	107635736	107636453	+	28	NA	Intergenic	Intergenic	30214	ENSMUST00000123086.1	ENSMUSG00000026315	ENSMUST00000112706			Serpinb8			protein_coding
Sox9_E16_Sample1_peak_1787	chr1	107705769	107706338	+	78	NA	Intergenic	Intergenic	19045	ENSMUST00000153774.1	ENSMUSG00000086161	ENSMUST00000153774			Gm15389			lncRNA
Sox9_E16_Sample1_peak_1788	chr1	107748431	107749291	+	95	NA	Intergenic	Intergenic	7847	ENSMUST00000179841.1	ENSMUSG00000096241	ENSMUST00000179841			Gm24267			snRNA
Sox9_E16_Sample1_peak_1789	chr1	107914927	107915942	+	92	NA	Intergenic	Intergenic	-1825	ENSMUST00000189845.6	ENSMUSG00000100457	ENSMUST00000189497			D830032E09Rik			lncRNA
Sox9_E16_Sample1_peak_1790	chr1	107917387	107917817	+	42	NA	intron (ENSMUST00000189845.6, intron 1 of 3)	lncRNA-intron (ENSMUST00000186875.6, intron 1 of 4)	317	ENSMUST00000186875.6	ENSMUSG00000100457	ENSMUST00000189497			D830032E09Rik			lncRNA
Sox9_E16_Sample1_peak_1791	chr1	107941732	107942565	+	291	NA	intron (ENSMUST00000186875.6, intron 4 of 4)	lncRNA-intron (ENSMUST00000186875.6, intron 4 of 4)	5439	ENSMUST00000189497.1	ENSMUSG00000100457	ENSMUST00000189497			D830032E09Rik			lncRNA
Sox9_E16_Sample1_peak_1792	chr1	107985868	107986255	+	78	NA	intron (ENSMUST00000189497.1, intron 3 of 3)	lncRNA-intron (ENSMUST00000189497.1, intron 3 of 3)	-22754	ENSMUST00000186072.1	ENSMUSG00000099484	ENSMUST00000186072			Gm28282			processed_pseudogene
Sox9_E16_Sample1_peak_1793	chr1	108094450	108095644	+	354	NA	Intergenic	Intergenic	-131740	ENSMUST00000186072.1	ENSMUSG00000099484	ENSMUST00000186072			Gm28282			processed_pseudogene
Sox9_E16_Sample1_peak_1794	chr1	108110501	108111546	+	329	NA	Intergenic	Intergenic	-147716	ENSMUST00000186072.1	ENSMUSG00000099484	ENSMUST00000186072			Gm28282			processed_pseudogene
Sox9_E16_Sample1_peak_1795	chr1	108178268	108178563	+	70	NA	Intergenic	Intergenic	201023	ENSMUST00000185629.1	ENSMUSG00000100041	ENSMUST00000185629			Gm5702			processed_pseudogene
Sox9_E16_Sample1_peak_1797	chr1	108670653	108671730	+	247	NA	Intergenic	Intergenic	-58677	ENSMUST00000185509.1	ENSMUSG00000101231	ENSMUST00000185509			Gm28283			processed_pseudogene
Sox9_E16_Sample1_peak_1798	chr1	109982370	109983315	+	92	NA	promoter-TSS (ENSMUST00000129923.1)	protein_coding-promoter-TSS (ENSMUST00000129923.1)	132	ENSMUST00000112701.7	ENSMUSG00000026312	ENSMUST00000134301			Cdh7			protein_coding
Sox9_E16_Sample1_peak_1801	chr1	111864107	111865319	+	3096	NA	promoter-TSS (ENSMUST00000186365.1)	protein_coding-promoter-TSS (ENSMUST00000186365.1)	55	ENSMUST00000186365.1	ENSMUSG00000038702	ENSMUST00000189370			Dsel			protein_coding
Sox9_E16_Sample1_peak_1802	chr1	111987588	111987945	+	23	NA	Intergenic	Intergenic	69344	ENSMUST00000185787.2	ENSMUSG00000099732	ENSMUST00000185787			Gm17752			processed_pseudogene
Sox9_E16_Sample1_peak_1803	chr1	112378085	112379127	+	50	NA	Intergenic	Intergenic	26249	ENSMUST00000185872.1	ENSMUSG00000101054	ENSMUST00000185872			Gm18406			processed_pseudogene
Sox9_E16_Sample1_peak_1804	chr1	112383961	112384767	+	652	NA	Intergenic	Intergenic	20491	ENSMUST00000185872.1	ENSMUSG00000101054	ENSMUST00000185872			Gm18406			processed_pseudogene
Sox9_E16_Sample1_peak_1805	chr1	112416503	112417254	+	172	NA	Intergenic	Intergenic	-12023	ENSMUST00000185872.1	ENSMUSG00000101054	ENSMUST00000185872			Gm18406			processed_pseudogene
Sox9_E16_Sample1_peak_1806	chr1	112451889	112452509	+	53	NA	Intergenic	Intergenic	-15712	ENSMUST00000158066.1	ENSMUSG00000088691	ENSMUST00000158066			Gm22331			snoRNA
Sox9_E16_Sample1_peak_1807	chr1	112456012	112456695	+	110	NA	Intergenic	Intergenic	-11558	ENSMUST00000158066.1	ENSMUSG00000088691	ENSMUST00000158066			Gm22331			snoRNA
Sox9_E16_Sample1_peak_1808	chr1	113543712	113543981	+	45	NA	Intergenic	Intergenic	22137	ENSMUST00000186856.1	ENSMUSG00000102105	ENSMUST00000186856			Gm17946			processed_pseudogene
Sox9_E16_Sample1_peak_1809	chr1	114518657	114519147	+	23	NA	Intergenic	Intergenic	-554768	ENSMUST00000180837.1	ENSMUSG00000097648	ENSMUST00000180837			9330185C12Rik			lncRNA
Sox9_E16_Sample1_peak_1810	chr1	114835851	114836609	+	81	NA	Intergenic	Intergenic	383533	ENSMUST00000185902.1	ENSMUSG00000101687	ENSMUST00000185902			Gm4854			processed_pseudogene
Sox9_E16_Sample1_peak_1811	chr1	114856159	114856941	+	198	NA	Intergenic	Intergenic	363213	ENSMUST00000185902.1	ENSMUSG00000101687	ENSMUST00000185902			Gm4854			processed_pseudogene
Sox9_E16_Sample1_peak_1812	chr1	115516832	115516984	+	23	NA	Intergenic	Intergenic	153681	ENSMUST00000187634.1	ENSMUSG00000100515	ENSMUST00000186137			Gm17916			transcribed_processed_pseudogene
Sox9_E16_Sample1_peak_1813	chr1	115684335	115684989	+	92	NA	promoter-TSS (ENSMUST00000043725.8)	protein_coding-promoter-TSS (ENSMUST00000043725.8)	-38	ENSMUST00000189918.1	ENSMUSG00000100515	ENSMUST00000186137			Gm17916			transcribed_processed_pseudogene
Sox9_E16_Sample1_peak_1815	chr1	115917960	115918972	+	371	NA	intron (ENSMUST00000043725.8, intron 3 of 23)	protein_coding-intron (ENSMUST00000043725.8, intron 3 of 23)	233710	ENSMUST00000043725.8	ENSMUSG00000070695	ENSMUST00000043725			Cntnap5a			protein_coding
Sox9_E16_Sample1_peak_1816	chr1	116070085	116070569	+	28	NA	intron (ENSMUST00000043725.8, intron 4 of 23)	protein_coding-intron (ENSMUST00000043725.8, intron 4 of 23)	324086	ENSMUST00000175207.1	ENSMUSG00000092948	ENSMUST00000175207			Gm23393			miRNA
Sox9_E16_Sample1_peak_1817	chr1	116099340	116099990	+	133	NA	intron (ENSMUST00000043725.8, intron 5 of 23)	protein_coding-intron (ENSMUST00000043725.8, intron 5 of 23)	294748	ENSMUST00000175207.1	ENSMUSG00000092948	ENSMUST00000175207			Gm23393			miRNA
Sox9_E16_Sample1_peak_1818	chr1	116285536	116286309	+	166	NA	intron (ENSMUST00000043725.8, intron 12 of 23)	protein_coding-intron (ENSMUST00000043725.8, intron 12 of 23)	108491	ENSMUST00000175207.1	ENSMUSG00000092948	ENSMUST00000175207			Gm23393			miRNA
Sox9_E16_Sample1_peak_1819	chr1	116324218	116324942	+	138	NA	intron (ENSMUST00000043725.8, intron 13 of 23)	protein_coding-intron (ENSMUST00000043725.8, intron 13 of 23)	69833	ENSMUST00000175207.1	ENSMUSG00000092948	ENSMUST00000175207			Gm23393			miRNA
Sox9_E16_Sample1_peak_1821	chr1	118012500	118013153	+	39	NA	TTS (ENSMUST00000189292.1)	transcribed_unprocessed_pseudogene-TTS (ENSMUST00000189292.1)	2315	ENSMUST00000189292.1	ENSMUSG00000100703	ENSMUST00000189292			Gm28358			transcribed_unprocessed_pseudogene
Sox9_E16_Sample1_peak_1822	chr1	118296350	118297276	+	543	NA	exon (ENSMUST00000027623.8, exon 6 of 6)	protein_coding-exon (ENSMUST00000027623.8, exon 6 of 6)	13173	ENSMUST00000188512.6	ENSMUSG00000026374	ENSMUST00000189768			Tsn			protein_coding
Sox9_E16_Sample1_peak_1823	chr1	118310764	118312015	+	765	NA	promoter-TSS (ENSMUST00000027623.8)	protein_coding-promoter-TSS (ENSMUST00000027623.8)	27	ENSMUST00000027623.8	ENSMUSG00000026374	ENSMUST00000189768			Tsn			protein_coding
Sox9_E16_Sample1_peak_1824	chr1	118321093	118322605	+	516	NA	promoter-TSS (ENSMUST00000027626.12)	protein_coding-promoter-TSS (ENSMUST00000027626.12)	-5	ENSMUST00000112688.9	ENSMUSG00000026377	ENSMUST00000161495			Nifk			protein_coding
Sox9_E16_Sample1_peak_1825	chr1	118388244	118390199	+	1299	NA	promoter-TSS (ENSMUST00000165223.7)	protein_coding-promoter-TSS (ENSMUST00000165223.7)	-123	ENSMUST00000189676.6	ENSMUSG00000064302	ENSMUST00000186349			Clasp1			protein_coding
Sox9_E16_Sample1_peak_1826	chr1	118398082	118399176	+	256	NA	intron (ENSMUST00000049404.12, intron 1 of 39)	protein_coding-intron (ENSMUST00000049404.12, intron 1 of 39)	9112	ENSMUST00000189262.6	ENSMUSG00000064302	ENSMUST00000186349			Clasp1			protein_coding
Sox9_E16_Sample1_peak_1828	chr1	118458795	118459907	+	1680	NA	promoter-TSS (ENSMUST00000116892.1)	snRNA-promoter-TSS (ENSMUST00000116892.1)	-84	ENSMUST00000203191.1	ENSMUSG00000107722	ENSMUST00000203191			2900060B14Rik			lncRNA
Sox9_E16_Sample1_peak_1829	chr1	118481139	118482498	+	449	NA	promoter-TSS (ENSMUST00000191823.5)	protein_coding-promoter-TSS (ENSMUST00000191823.5)	-221	ENSMUST00000191823.5	ENSMUSG00000064302	ENSMUST00000186349			Clasp1			protein_coding
Sox9_E16_Sample1_peak_1830	chr1	118598087	118598896	+	103	NA	intron (ENSMUST00000187713.6, intron 36 of 38)	protein_coding-intron (ENSMUST00000049404.12, intron 37 of 39)	-6236	ENSMUST00000187575.2	ENSMUSG00000064302	ENSMUST00000186349			Clasp1			protein_coding
Sox9_E16_Sample1_peak_1831	chr1	118627528	118628438	+	989	NA	promoter-TSS (ENSMUST00000027629.9)	protein_coding-promoter-TSS (ENSMUST00000027629.9)	37	ENSMUST00000027629.9	ENSMUSG00000026380	ENSMUST00000190652			Tfcp2l1			protein_coding
Sox9_E16_Sample1_peak_1832	chr1	118642932	118644008	+	133	NA	intron (ENSMUST00000027629.9, intron 2 of 14)	protein_coding-intron (ENSMUST00000027629.9, intron 2 of 14)	-5066	ENSMUST00000158976.1	ENSMUSG00000089601	ENSMUST00000158976			Gm22094			rRNA
Sox9_E16_Sample1_peak_1833	chr1	118649711	118650840	+	379	NA	intron (ENSMUST00000027629.9, intron 2 of 14)	protein_coding-intron (ENSMUST00000027629.9, intron 2 of 14)	1520	ENSMUST00000185504.1	ENSMUSG00000101624	ENSMUST00000185504			Gm28882			processed_pseudogene
Sox9_E16_Sample1_peak_1834	chr1	118660850	118661511	+	45	NA	intron (ENSMUST00000027629.9, intron 7 of 14)	protein_coding-intron (ENSMUST00000027629.9, intron 7 of 14)	-9385	ENSMUST00000185504.1	ENSMUSG00000101624	ENSMUST00000185504			Gm28882			processed_pseudogene
Sox9_E16_Sample1_peak_1835	chr1	118671884	118672607	+	246	NA	intron (ENSMUST00000027629.9, intron 13 of 14)	protein_coding-intron (ENSMUST00000027629.9, intron 13 of 14)	-9576	ENSMUST00000157738.1	ENSMUSG00000088363	ENSMUST00000157738			Gm23497			snRNA
Sox9_E16_Sample1_peak_1836	chr1	118689577	118690447	+	299	NA	Intergenic	Intergenic	8191	ENSMUST00000157738.1	ENSMUSG00000088363	ENSMUST00000157738			Gm23497			snRNA
Sox9_E16_Sample1_peak_1837	chr1	118697986	118698476	+	122	NA	Intergenic	Intergenic	16410	ENSMUST00000157738.1	ENSMUSG00000088363	ENSMUST00000157738			Gm23497			snRNA
Sox9_E16_Sample1_peak_1838	chr1	118711561	118712226	+	138	NA	Intergenic	Intergenic	30072	ENSMUST00000157738.1	ENSMUSG00000088363	ENSMUST00000157738			Gm23497			snRNA
Sox9_E16_Sample1_peak_1839	chr1	118717939	118718477	+	78	NA	Intergenic	Intergenic	36387	ENSMUST00000157738.1	ENSMUSG00000088363	ENSMUST00000157738			Gm23497			snRNA
Sox9_E16_Sample1_peak_1840	chr1	118905049	118905958	+	199	NA	intron (ENSMUST00000159839.7, intron 2 of 6)	protein_coding-intron (ENSMUST00000062483.14, intron 2 of 13)	-48717	ENSMUST00000183982.1	ENSMUSG00000098273	ENSMUST00000183982			Mir6346			miRNA
Sox9_E16_Sample1_peak_1841	chr1	118913361	118914320	+	1296	NA	intron (ENSMUST00000159839.7, intron 2 of 6)	protein_coding-intron (ENSMUST00000062483.14, intron 2 of 13)	-40380	ENSMUST00000183982.1	ENSMUSG00000098273	ENSMUST00000183982			Mir6346			miRNA
Sox9_E16_Sample1_peak_1842	chr1	118981972	118983073	+	327	NA	promoter-TSS (ENSMUST00000159678.2)	protein_coding-promoter-TSS (ENSMUST00000159678.2)	66	ENSMUST00000159678.2	ENSMUSG00000048402	ENSMUST00000161451			Gli2			protein_coding
Sox9_E16_Sample1_peak_1843	chr1	119047538	119048173	+	162	NA	intron (ENSMUST00000161301.7, intron 1 of 9)	protein_coding-intron (ENSMUST00000062483.14, intron 1 of 13)	5484	ENSMUST00000162552.7	ENSMUSG00000048402	ENSMUST00000161451			Gli2			protein_coding
Sox9_E16_Sample1_peak_1845	chr1	119053558	119054242	+	84	NA	promoter-TSS (ENSMUST00000062483.14)	protein_coding-promoter-TSS (ENSMUST00000062483.14)	-281	ENSMUST00000062483.14	ENSMUSG00000048402	ENSMUST00000161451			Gli2			protein_coding
Sox9_E16_Sample1_peak_1846	chr1	119189538	119190015	+	58	NA	Intergenic	Intergenic	32190	ENSMUST00000181691.1	ENSMUSG00000096939	ENSMUST00000181691			Gm8321			processed_pseudogene
Sox9_E16_Sample1_peak_1847	chr1	119196459	119196898	+	51	NA	Intergenic	Intergenic	39092	ENSMUST00000181691.1	ENSMUSG00000096939	ENSMUST00000181691			Gm8321			processed_pseudogene
Sox9_E16_Sample1_peak_1848	chr1	119278723	119279458	+	85	NA	Intergenic	Intergenic	-36337	ENSMUST00000186012.1	ENSMUSG00000100767	ENSMUST00000186012			Gm3508			processed_pseudogene
Sox9_E16_Sample1_peak_1849	chr1	119289922	119291131	+	419	NA	Intergenic	Intergenic	36307	ENSMUST00000189894.1	ENSMUSG00000099860	ENSMUST00000189894			Gm29456			lncRNA
Sox9_E16_Sample1_peak_1850	chr1	119305459	119305998	+	125	NA	intron (ENSMUST00000189894.1, intron 3 of 3)	lncRNA-intron (ENSMUST00000189894.1, intron 3 of 3)	21105	ENSMUST00000189894.1	ENSMUSG00000099860	ENSMUST00000189894			Gm29456			lncRNA
Sox9_E16_Sample1_peak_1851	chr1	119321813	119322362	+	85	NA	intron (ENSMUST00000189894.1, intron 1 of 3)	lncRNA-intron (ENSMUST00000189894.1, intron 1 of 3)	4746	ENSMUST00000189894.1	ENSMUSG00000099860	ENSMUST00000189894			Gm29456			lncRNA
Sox9_E16_Sample1_peak_1852	chr1	119328755	119329740	+	206	NA	promoter-TSS (ENSMUST00000186504.1)	lncRNA-promoter-TSS (ENSMUST00000186504.1)	5	ENSMUST00000186504.1	ENSMUSG00000101179	ENSMUST00000186504			Gm29455			lncRNA
Sox9_E16_Sample1_peak_1853	chr1	119420794	119422329	+	340	NA	exon (ENSMUST00000038765.5, exon 1 of 2)	protein_coding-exon (ENSMUST00000038765.5, exon 1 of 2)	687	ENSMUST00000038765.5	ENSMUSG00000037035	ENSMUST00000038765			Inhbb			protein_coding
Sox9_E16_Sample1_peak_1855	chr1	119492074	119492576	+	78	NA	intron (ENSMUST00000004565.14, intron 1 of 4)	protein_coding-intron (ENSMUST00000004565.14, intron 1 of 4)	-7152	ENSMUST00000190805.1	ENSMUSG00000101437	ENSMUST00000190805			Gm29454			processed_pseudogene
Sox9_E16_Sample1_peak_1856	chr1	119504026	119505412	+	776	NA	promoter-TSS (ENSMUST00000004565.14)	protein_coding-promoter-TSS (ENSMUST00000004565.14)	75	ENSMUST00000004565.14	ENSMUSG00000004451	ENSMUST00000156213			Ralb			protein_coding
Sox9_E16_Sample1_peak_1857	chr1	119524939	119526560	+	590	NA	promoter-TSS (ENSMUST00000183607.1)	protein_coding-promoter-TSS (ENSMUST00000183607.1)	-411	ENSMUST00000183952.1	ENSMUSG00000098923	ENSMUST00000183952			Tmem185b			protein_coding
Sox9_E16_Sample1_peak_1858	chr1	119541101	119542050	+	150	NA	Intergenic	Intergenic	-5410	ENSMUST00000188909.1	ENSMUSG00000101731	ENSMUST00000186206			3830432H09Rik			lncRNA
Sox9_E16_Sample1_peak_1859	chr1	119641212	119641656	+	325	NA	intron (ENSMUST00000187194.1, intron 2 of 4)	protein_coding-intron (ENSMUST00000027632.13, intron 2 of 16)	7183	ENSMUST00000027632.13	ENSMUSG00000026383	ENSMUST00000052404			Epb41l5			protein_coding
Sox9_E16_Sample1_peak_1860	chr1	119648343	119649942	+	817	NA	promoter-TSS (ENSMUST00000027632.13)	protein_coding-promoter-TSS (ENSMUST00000027632.13)	-142	ENSMUST00000191046.6	ENSMUSG00000026383	ENSMUST00000052404			Epb41l5			protein_coding
Sox9_E16_Sample1_peak_1861	chr1	119836658	119837954	+	1262	NA	promoter-TSS (ENSMUST00000163435.7)	protein_coding-promoter-TSS (ENSMUST00000163435.7)	41	ENSMUST00000163435.7	ENSMUSG00000026384	ENSMUST00000168808			Ptpn4			protein_coding
Sox9_E16_Sample1_peak_1862	chr1	119889571	119889926	+	58	NA	Intergenic	Intergenic	-7713	ENSMUST00000190750.1	ENSMUSG00000100636	ENSMUST00000190750			Gm3551			processed_pseudogene
Sox9_E16_Sample1_peak_1864	chr1	119899425	119899944	+	28	NA	Intergenic	Intergenic	2223	ENSMUST00000190750.1	ENSMUSG00000100636	ENSMUST00000190750			Gm3551			processed_pseudogene
Sox9_E16_Sample1_peak_1865	chr1	119907220	119907719	+	28	NA	TTS (ENSMUST00000037906.5)	protein_coding-TTS (ENSMUST00000037906.5)	4339	ENSMUST00000187956.1	ENSMUSG00000101224	ENSMUST00000187956			Gm28209			lncRNA
Sox9_E16_Sample1_peak_1866	chr1	119912956	119913677	+	518	NA	promoter-TSS (ENSMUST00000037906.5)	protein_coding-promoter-TSS (ENSMUST00000037906.5)	-108	ENSMUST00000037906.5	ENSMUSG00000036975	ENSMUST00000037906			Tmem177			protein_coding
Sox9_E16_Sample1_peak_1867	chr1	119957754	119958013	+	34	NA	intron (ENSMUST00000037840.11, intron 6 of 22)	protein_coding-intron (ENSMUST00000037840.11, intron 6 of 22)	-28912	ENSMUST00000174509.1	ENSMUSG00000092245	ENSMUST00000174509			Gm17973			processed_pseudogene
Sox9_E16_Sample1_peak_1868	chr1	119965516	119966372	+	216	NA	intron (ENSMUST00000174458.1, intron 6 of 6)	protein_coding-intron (ENSMUST00000037840.11, intron 5 of 22)	-20851	ENSMUST00000174509.1	ENSMUSG00000092245	ENSMUST00000174509			Gm17973			processed_pseudogene
Sox9_E16_Sample1_peak_1869	chr1	119996820	119997887	+	781	NA	promoter-TSS (ENSMUST00000174370.7)	protein_coding-promoter-TSS (ENSMUST00000174370.7)	-119	ENSMUST00000174458.1	ENSMUSG00000036962	ENSMUST00000174458			Cfap221			protein_coding
Sox9_E16_Sample1_peak_1870	chr1	120007067	120007746	+	45	NA	intron (ENSMUST00000189037.1, intron 1 of 12)	protein_coding-intron (ENSMUST00000072886.10, intron 1 of 13)	372	ENSMUST00000189037.1	ENSMUSG00000026387	ENSMUST00000189037			Sctr			protein_coding
Sox9_E16_Sample1_peak_1871	chr1	120024699	120025295	+	145	NA	intron (ENSMUST00000072886.10, intron 3 of 13)	protein_coding-intron (ENSMUST00000072886.10, intron 3 of 13)	17963	ENSMUST00000189037.1	ENSMUSG00000026387	ENSMUST00000189037			Sctr			protein_coding
Sox9_E16_Sample1_peak_1872	chr1	120027561	120028228	+	188	NA	intron (ENSMUST00000072886.10, intron 3 of 13)	protein_coding-intron (ENSMUST00000072886.10, intron 3 of 13)	20860	ENSMUST00000189037.1	ENSMUSG00000026387	ENSMUST00000189037			Sctr			protein_coding
Sox9_E16_Sample1_peak_1873	chr1	120032948	120033478	+	199	NA	intron (ENSMUST00000189037.1, intron 3 of 12)	protein_coding-intron (ENSMUST00000072886.10, intron 4 of 13)	26179	ENSMUST00000189037.1	ENSMUSG00000026387	ENSMUST00000189037			Sctr			protein_coding
Sox9_E16_Sample1_peak_1875	chr1	120069125	120069585	+	134	NA	intron (ENSMUST00000056089.7, intron 1 of 1)	protein_coding-intron (ENSMUST00000056089.7, intron 1 of 1)	4719	ENSMUST00000056089.7	ENSMUSG00000050777	ENSMUST00000056089			Tmem37			protein_coding
Sox9_E16_Sample1_peak_1876	chr1	120073075	120074178	+	469	NA	intron (ENSMUST00000056089.7, intron 1 of 1)	protein_coding-intron (ENSMUST00000056089.7, intron 1 of 1)	448	ENSMUST00000056089.7	ENSMUSG00000050777	ENSMUST00000056089			Tmem37			protein_coding
Sox9_E16_Sample1_peak_1877	chr1	120082832	120083477	+	366	NA	Intergenic	Intergenic	-9080	ENSMUST00000056089.7	ENSMUSG00000050777	ENSMUST00000056089			Tmem37			protein_coding
Sox9_E16_Sample1_peak_1879	chr1	120105284	120106213	+	514	NA	Intergenic	Intergenic	14390	ENSMUST00000112648.7	ENSMUSG00000026385	ENSMUST00000027634			Dbi			protein_coding
Sox9_E16_Sample1_peak_1880	chr1	120115571	120116197	+	29	NA	TTS (ENSMUST00000135937.1)	protein_coding-TTS (ENSMUST00000135937.1)	4254	ENSMUST00000112648.7	ENSMUSG00000026385	ENSMUST00000027634			Dbi			protein_coding
Sox9_E16_Sample1_peak_1881	chr1	120120085	120121740	+	697	NA	promoter-TSS (ENSMUST00000027637.12)	protein_coding-promoter-TSS (ENSMUST00000027637.12)	25	ENSMUST00000151708.2	ENSMUSG00000026385	ENSMUST00000027634			Dbi			protein_coding
Sox9_E16_Sample1_peak_1883	chr1	120146965	120147464	+	114	NA	intron (ENSMUST00000027637.12, intron 1 of 4)	protein_coding-intron (ENSMUST00000027637.12, intron 1 of 4)	-3385	ENSMUST00000187809.1	ENSMUSG00000026388	ENSMUST00000153037			3110009E18Rik			protein_coding
Sox9_E16_Sample1_peak_1885	chr1	120171490	120172173	+	318	NA	intron (ENSMUST00000112644.8, intron 5 of 5)	protein_coding-intron (ENSMUST00000027637.12, intron 4 of 4)	11351	ENSMUST00000128578.1	ENSMUSG00000026388	ENSMUST00000153037			3110009E18Rik			protein_coding
Sox9_E16_Sample1_peak_1886	chr1	120197002	120197599	+	64	NA	intron (ENSMUST00000140490.7, intron 4 of 4)	protein_coding-intron (ENSMUST00000140490.7, intron 4 of 4)	36820	ENSMUST00000128578.1	ENSMUSG00000026388	ENSMUST00000153037			3110009E18Rik			protein_coding
Sox9_E16_Sample1_peak_1887	chr1	120264621	120265677	+	1059	NA	intron (ENSMUST00000112643.1, intron 2 of 5)	protein_coding-intron (ENSMUST00000112639.7, intron 1 of 4)	106	ENSMUST00000140490.7	ENSMUSG00000026389	ENSMUST00000140490			Steap3			protein_coding
Sox9_E16_Sample1_peak_1888	chr1	120340634	120342818	+	172	NA	exon (ENSMUST00000037286.9, exon 1 of 2)	protein_coding-exon (ENSMUST00000037286.9, exon 1 of 2)	1144	ENSMUST00000037286.9	ENSMUSG00000036907	ENSMUST00000037286			C1ql2			protein_coding
Sox9_E16_Sample1_peak_1889	chr1	120356842	120358203	+	1082	NA	Intergenic	Intergenic	16940	ENSMUST00000037286.9	ENSMUSG00000036907	ENSMUST00000037286			C1ql2			protein_coding
Sox9_E16_Sample1_peak_1891	chr1	120529767	120530214	+	114	NA	Intergenic	Intergenic	-24966	ENSMUST00000027639.7	ENSMUSG00000026390	ENSMUST00000186432			Marco			protein_coding
Sox9_E16_Sample1_peak_1894	chr1	120602686	120603739	+	76	NA	exon (ENSMUST00000079721.8, exon 1 of 2)	protein_coding-exon (ENSMUST00000079721.8, exon 1 of 2)	794	ENSMUST00000079721.8	ENSMUSG00000058665	ENSMUST00000079721			En1			protein_coding
Sox9_E16_Sample1_peak_1895	chr1	120614428	120614497	+	34	NA	Intergenic	Intergenic	-7278	ENSMUST00000186982.2	ENSMUSG00000099957	ENSMUST00000186982			2610027F03Rik			lncRNA
Sox9_E16_Sample1_peak_1897	chr1	120814290	120815192	+	114	NA	Intergenic	Intergenic	-1759	ENSMUST00000189213.1	ENSMUSG00000101922	ENSMUST00000189213			Gm29345			lncRNA
Sox9_E16_Sample1_peak_1900	chr1	121180242	121180603	+	31	NA	Intergenic	Intergenic	-43854	ENSMUST00000191007.1	ENSMUSG00000101700	ENSMUST00000191007			Gm29359			lncRNA
Sox9_E16_Sample1_peak_1901	chr1	121327169	121328487	+	1375	NA	promoter-TSS (ENSMUST00000159085.7)	protein_coding-promoter-TSS (ENSMUST00000159085.7)	-35	ENSMUST00000160688.1	ENSMUSG00000003721	ENSMUST00000159125			Insig2			protein_coding
Sox9_E16_Sample1_peak_1902	chr1	121343756	121344390	+	78	NA	Intergenic	Intergenic	-11484	ENSMUST00000071064.12	ENSMUSG00000003721	ENSMUST00000159125			Insig2			protein_coding
Sox9_E16_Sample1_peak_1903	chr1	121430753	121431921	+	1250	NA	intron (ENSMUST00000156459.7, intron 1 of 5)	protein_coding-intron (ENSMUST00000036025.15, intron 1 of 23)	227	ENSMUST00000112621.1	ENSMUSG00000026339	ENSMUST00000128924			Ccdc93			protein_coding
Sox9_E16_Sample1_peak_1904	chr1	121527405	121528922	+	113	NA	exon (ENSMUST00000055884.7, exon 1 of 2)	protein_coding-exon (ENSMUST00000055884.7, exon 1 of 2)	302	ENSMUST00000055884.7	ENSMUSG00000050534	ENSMUST00000055884			Htr5b			protein_coding
Sox9_E16_Sample1_peak_1905	chr1	121567356	121568332	+	1096	NA	promoter-TSS (ENSMUST00000131471.1)	protein_coding-promoter-TSS (ENSMUST00000131471.1)	-122	ENSMUST00000131471.1	ENSMUSG00000001674	ENSMUST00000134417			Ddx18			protein_coding
Sox9_E16_Sample1_peak_1906	chr1	122109517	122110136	+	64	NA	Intergenic	Intergenic	-80395	ENSMUST00000185647.1	ENSMUSG00000100913	ENSMUST00000185647			Gm8392			processed_pseudogene
Sox9_E16_Sample1_peak_1908	chr1	123179279	123180528	+	196	NA	Intergenic	Intergenic	-25246	ENSMUST00000188837.1	ENSMUSG00000100405	ENSMUST00000188837			Gm28911			processed_pseudogene
Sox9_E16_Sample1_peak_1909	chr1	123193527	123194462	+	137	NA	Intergenic	Intergenic	-11155	ENSMUST00000188837.1	ENSMUSG00000100405	ENSMUST00000188837			Gm28911			processed_pseudogene
Sox9_E16_Sample1_peak_1910	chr1	123233592	123234017	+	97	NA	Intergenic	Intergenic	28655	ENSMUST00000188837.1	ENSMUSG00000100405	ENSMUST00000188837			Gm28911			processed_pseudogene
Sox9_E16_Sample1_peak_1912	chr1	124045217	124046196	+	102	NA	promoter-TSS (ENSMUST00000112603.3)	protein_coding-promoter-TSS (ENSMUST00000112603.3)	-147	ENSMUST00000112606.7	ENSMUSG00000036815	ENSMUST00000187286			Dpp10			protein_coding
Sox9_E16_Sample1_peak_1913	chr1	125223107	125224289	+	181	NA	Intergenic	Intergenic	-26243	ENSMUST00000187796.1	ENSMUSG00000099574	ENSMUST00000187796			1700121L03Rik			lncRNA
Sox9_E16_Sample1_peak_1914	chr1	125371012	125371427	+	107	NA	Intergenic	Intergenic	26393	ENSMUST00000186008.6	ENSMUSG00000026341	ENSMUST00000187460			Actr3			protein_coding
Sox9_E16_Sample1_peak_1915	chr1	125430998	125431830	+	68	NA	intron (ENSMUST00000191578.6, intron 1 of 10)	protein_coding-intron (ENSMUST00000027579.16, intron 2 of 12)	3232	ENSMUST00000191544.6	ENSMUSG00000026341	ENSMUST00000187460			Actr3			protein_coding
Sox9_E16_Sample1_peak_1916	chr1	125434904	125436157	+	841	NA	promoter-TSS (ENSMUST00000178474.7)	protein_coding-promoter-TSS (ENSMUST00000178474.7)	17	ENSMUST00000178474.7	ENSMUSG00000026341	ENSMUST00000187460			Actr3			protein_coding
Sox9_E16_Sample1_peak_1917	chr1	125481854	125483499	+	89	NA	Intergenic	Intergenic	38109	ENSMUST00000186830.1	ENSMUSG00000102063	ENSMUST00000186830			Gm28706			lncRNA
Sox9_E16_Sample1_peak_1918	chr1	125489255	125489603	+	64	NA	Intergenic	Intergenic	44862	ENSMUST00000186830.1	ENSMUSG00000102063	ENSMUST00000186830			Gm28706			lncRNA
Sox9_E16_Sample1_peak_1921	chr1	125525734	125526501	+	130	NA	Intergenic	Intergenic	-34478	ENSMUST00000190037.6	ENSMUSG00000026342	ENSMUST00000189443			Slc35f5			protein_coding
Sox9_E16_Sample1_peak_1922	chr1	125532858	125533927	+	388	NA	Intergenic	Intergenic	-27203	ENSMUST00000190037.6	ENSMUSG00000026342	ENSMUST00000189443			Slc35f5			protein_coding
Sox9_E16_Sample1_peak_1923	chr1	125549861	125551346	+	381	NA	Intergenic	Intergenic	-9992	ENSMUST00000190037.6	ENSMUSG00000026342	ENSMUST00000189443			Slc35f5			protein_coding
Sox9_E16_Sample1_peak_1924	chr1	125560198	125561457	+	1697	NA	promoter-TSS (ENSMUST00000027580.10)	protein_coding-promoter-TSS (ENSMUST00000027580.10)	-189	ENSMUST00000027580.10	ENSMUSG00000026342	ENSMUST00000189443			Slc35f5			protein_coding
Sox9_E16_Sample1_peak_1925	chr1	125676384	125677497	+	355	NA	promoter-TSS (ENSMUST00000027581.6)	protein_coding-promoter-TSS (ENSMUST00000027581.6)	-55	ENSMUST00000027581.6	ENSMUSG00000026343	ENSMUST00000027581			Gpr39			protein_coding
Sox9_E16_Sample1_peak_1926	chr1	125687533	125688541	+	430	NA	intron (ENSMUST00000027581.6, intron 1 of 1)	protein_coding-intron (ENSMUST00000027581.6, intron 1 of 1)	11042	ENSMUST00000027581.6	ENSMUSG00000026343	ENSMUST00000027581			Gpr39			protein_coding
Sox9_E16_Sample1_peak_1927	chr1	125759915	125760385	+	78	NA	intron (ENSMUST00000027581.6, intron 1 of 1)	protein_coding-intron (ENSMUST00000027581.6, intron 1 of 1)	-79853	ENSMUST00000159359.1	ENSMUSG00000026343	ENSMUST00000027581			Gpr39			protein_coding
Sox9_E16_Sample1_peak_1928	chr1	125814650	125815581	+	51	NA	intron (ENSMUST00000027581.6, intron 1 of 1)	protein_coding-intron (ENSMUST00000027581.6, intron 1 of 1)	-24888	ENSMUST00000159359.1	ENSMUSG00000026343	ENSMUST00000027581			Gpr39			protein_coding
Sox9_E16_Sample1_peak_1929	chr1	125835593	125835948	+	51	NA	intron (ENSMUST00000027581.6, intron 1 of 1)	protein_coding-intron (ENSMUST00000027581.6, intron 1 of 1)	-4233	ENSMUST00000159359.1	ENSMUSG00000026343	ENSMUST00000027581			Gpr39			protein_coding
Sox9_E16_Sample1_peak_1930	chr1	125911292	125912856	+	298	NA	promoter-TSS (ENSMUST00000162899.7)	protein_coding-promoter-TSS (ENSMUST00000162899.7)	140	ENSMUST00000159417.1	ENSMUSG00000026344	ENSMUST00000159417			Lypd1			protein_coding
Sox9_E16_Sample1_peak_1931	chr1	126153535	126153817	+	44	NA	intron (ENSMUST00000094609.9, intron 7 of 12)	protein_coding-intron (ENSMUST00000057846.14, intron 4 of 12)	-82215	ENSMUST00000194647.1	ENSMUSG00000102723	ENSMUST00000194647			Gm37936			TEC
Sox9_E16_Sample1_peak_1932	chr1	126159316	126159908	+	202	NA	intron (ENSMUST00000094609.9, intron 7 of 12)	protein_coding-intron (ENSMUST00000057846.14, intron 4 of 12)	-88151	ENSMUST00000194647.1	ENSMUSG00000102723	ENSMUST00000194647			Gm37936			TEC
Sox9_E16_Sample1_peak_1933	chr1	126190504	126190892	+	45	NA	intron (ENSMUST00000094609.9, intron 7 of 12)	protein_coding-intron (ENSMUST00000057846.14, intron 4 of 12)	-119237	ENSMUST00000194647.1	ENSMUSG00000102723	ENSMUST00000194647			Gm37936			TEC
Sox9_E16_Sample1_peak_1936	chr1	126492373	126493169	+	124	NA	promoter-TSS (ENSMUST00000162877.7)	protein_coding-promoter-TSS (ENSMUST00000162877.7)	-29	ENSMUST00000162877.7	ENSMUSG00000049690	ENSMUST00000162664			Nckap5			protein_coding
Sox9_E16_Sample1_peak_1937	chr1	126513791	126515269	+	90	NA	intron (ENSMUST00000162646.7, intron 3 of 6)	protein_coding-intron (ENSMUST00000094609.9, intron 3 of 12)	-21603	ENSMUST00000161954.7	ENSMUSG00000049690	ENSMUST00000162664			Nckap5			protein_coding
Sox9_E16_Sample1_peak_1938	chr1	126568606	126569019	+	92	NA	intron (ENSMUST00000162647.1, intron 2 of 2)	protein_coding-intron (ENSMUST00000094609.9, intron 2 of 12)	-75885	ENSMUST00000161954.7	ENSMUSG00000049690	ENSMUST00000162664			Nckap5			protein_coding
Sox9_E16_Sample1_peak_1939	chr1	126593121	126593623	+	75	NA	intron (ENSMUST00000162647.1, intron 2 of 2)	protein_coding-intron (ENSMUST00000094609.9, intron 2 of 12)	-100445	ENSMUST00000161954.7	ENSMUSG00000049690	ENSMUST00000162664			Nckap5			protein_coding
Sox9_E16_Sample1_peak_1940	chr1	126603664	126605228	+	202	NA	intron (ENSMUST00000162647.1, intron 2 of 2)	protein_coding-intron (ENSMUST00000094609.9, intron 2 of 12)	-111519	ENSMUST00000161954.7	ENSMUSG00000049690	ENSMUST00000162664			Nckap5			protein_coding
Sox9_E16_Sample1_peak_1941	chr1	126617360	126618018	+	189	NA	intron (ENSMUST00000162647.1, intron 2 of 2)	protein_coding-intron (ENSMUST00000094609.9, intron 2 of 12)	120501	ENSMUST00000162664.7	ENSMUSG00000049690	ENSMUST00000162664			Nckap5			protein_coding
Sox9_E16_Sample1_peak_1942	chr1	126621945	126622845	+	131	NA	intron (ENSMUST00000162647.1, intron 2 of 2)	protein_coding-intron (ENSMUST00000094609.9, intron 2 of 12)	115795	ENSMUST00000162664.7	ENSMUSG00000049690	ENSMUST00000162664			Nckap5			protein_coding
Sox9_E16_Sample1_peak_1943	chr1	126675011	126675454	+	106	NA	intron (ENSMUST00000162647.1, intron 2 of 2)	protein_coding-intron (ENSMUST00000094609.9, intron 2 of 12)	62958	ENSMUST00000162664.7	ENSMUSG00000049690	ENSMUST00000162664			Nckap5			protein_coding
Sox9_E16_Sample1_peak_1944	chr1	126683057	126684284	+	104	NA	intron (ENSMUST00000162647.1, intron 2 of 2)	protein_coding-intron (ENSMUST00000094609.9, intron 2 of 12)	54520	ENSMUST00000162664.7	ENSMUSG00000049690	ENSMUST00000162664			Nckap5			protein_coding
Sox9_E16_Sample1_peak_1945	chr1	126737931	126738514	+	45	NA	promoter-TSS (ENSMUST00000160693.1)	protein_coding-promoter-TSS (ENSMUST00000160693.1)	-20	ENSMUST00000160693.1	ENSMUSG00000049690	ENSMUST00000162664			Nckap5			protein_coding
Sox9_E16_Sample1_peak_1946	chr1	126829165	126830923	+	194	NA	intron (ENSMUST00000112583.7, intron 1 of 16)	protein_coding-intron (ENSMUST00000094609.9, intron 1 of 12)	437	ENSMUST00000162647.1	ENSMUSG00000049690	ENSMUST00000162664			Nckap5			protein_coding
Sox9_E16_Sample1_peak_1947	chr1	126833008	126833546	+	147	NA	Intergenic	Intergenic	-2478	ENSMUST00000162646.7	ENSMUSG00000049690	ENSMUST00000162664			Nckap5			protein_coding
Sox9_E16_Sample1_peak_1948	chr1	126911157	126911967	+	78	NA	Intergenic	Intergenic	-34947	ENSMUST00000188266.1	ENSMUSG00000101600	ENSMUST00000186724			4930599A14Rik			lncRNA
Sox9_E16_Sample1_peak_1949	chr1	126925301	126925802	+	92	NA	Intergenic	Intergenic	-48936	ENSMUST00000188266.1	ENSMUSG00000101600	ENSMUST00000186724			4930599A14Rik			lncRNA
Sox9_E16_Sample1_peak_1951	chr1	127103514	127104107	+	85	NA	Intergenic	Intergenic	-53114	ENSMUST00000185860.1	ENSMUSG00000101385	ENSMUST00000185860			Gm5261			processed_pseudogene
Sox9_E16_Sample1_peak_1952	chr1	127204672	127206495	+	976	NA	intron (ENSMUST00000189427.6, intron 1 of 7)	protein_coding-intron (ENSMUST00000038361.10, intron 1 of 17)	555	ENSMUST00000190921.1	ENSMUSG00000036155	ENSMUST00000038361			Mgat5			protein_coding
Sox9_E16_Sample1_peak_1953	chr1	127365725	127366364	+	45	NA	intron (ENSMUST00000189427.6, intron 4 of 7)	protein_coding-intron (ENSMUST00000038361.10, intron 5 of 17)	-9087	ENSMUST00000083753.1	ENSMUSG00000065687	ENSMUST00000083753			Gm23734			snoRNA
Sox9_E16_Sample1_peak_1954	chr1	127408922	127409775	+	78	NA	intron (ENSMUST00000171405.1, intron 9 of 15)	protein_coding-intron (ENSMUST00000038361.10, intron 11 of 17)	2572	ENSMUST00000195573.1	ENSMUSG00000103390	ENSMUST00000195573			Gm38301			TEC
Sox9_E16_Sample1_peak_1955	chr1	127425363	127425715	+	58	NA	intron (ENSMUST00000171405.1, intron 10 of 15)	protein_coding-intron (ENSMUST00000038361.10, intron 12 of 17)	18763	ENSMUST00000195573.1	ENSMUSG00000103390	ENSMUST00000195573			Gm38301			TEC
Sox9_E16_Sample1_peak_1957	chr1	127568542	127569152	+	130	NA	intron (ENSMUST00000160616.7, intron 2 of 8)	protein_coding-intron (ENSMUST00000027585.13, intron 2 of 8)	-31417	ENSMUST00000162406.1	ENSMUSG00000026347	ENSMUST00000027585			Tmem163			protein_coding
Sox9_E16_Sample1_peak_1958	chr1	127586284	127586857	+	172	NA	intron (ENSMUST00000160616.7, intron 2 of 8)	protein_coding-intron (ENSMUST00000027585.13, intron 2 of 8)	-49140	ENSMUST00000162406.1	ENSMUSG00000026347	ENSMUST00000027585			Tmem163			protein_coding
Sox9_E16_Sample1_peak_1959	chr1	127626750	127627806	+	383	NA	intron (ENSMUST00000160616.7, intron 2 of 8)	protein_coding-intron (ENSMUST00000027585.13, intron 2 of 8)	50743	ENSMUST00000160616.7	ENSMUSG00000026347	ENSMUST00000027585			Tmem163			protein_coding
Sox9_E16_Sample1_peak_1960	chr1	127677348	127678181	+	261	NA	exon (ENSMUST00000027585.13, exon 1 of 9)	protein_coding-exon (ENSMUST00000027585.13, exon 1 of 9)	257	ENSMUST00000160616.7	ENSMUSG00000026347	ENSMUST00000027585			Tmem163			protein_coding
Sox9_E16_Sample1_peak_1961	chr1	127755603	127756620	+	173	NA	promoter-TSS (ENSMUST00000186537.1)	protein_coding-promoter-TSS (ENSMUST00000186537.1)	-646	ENSMUST00000186537.1	ENSMUSG00000026348	ENSMUST00000186537			Acmsd			protein_coding
Sox9_E16_Sample1_peak_1962	chr1	127773632	127774842	+	664	NA	promoter-TSS (ENSMUST00000027587.14)	protein_coding-promoter-TSS (ENSMUST00000027587.14)	73	ENSMUST00000027587.14	ENSMUSG00000026349	ENSMUST00000125760			Ccnt2			protein_coding
Sox9_E16_Sample1_peak_1963	chr1	127868479	127869223	+	916	NA	promoter-TSS (ENSMUST00000037649.5)	protein_coding-promoter-TSS (ENSMUST00000037649.5)	39	ENSMUST00000212506.1	ENSMUSG00000036104	ENSMUST00000212506			Rab3gap1			protein_coding
Sox9_E16_Sample1_peak_1964	chr1	127963044	127963337	+	34	NA	intron (ENSMUST00000112538.3, intron 17 of 20)	protein_coding-intron (ENSMUST00000086614.11, intron 17 of 20)	3674	ENSMUST00000186230.1	ENSMUSG00000099760	ENSMUST00000186230			Gm28800			lncRNA
Sox9_E16_Sample1_peak_1965	chr1	128013928	128014674	+	138	NA	intron (ENSMUST00000127393.7, intron 2 of 2)	protein_coding-intron (ENSMUST00000086614.11, intron 8 of 20)	4392	ENSMUST00000131732.1	ENSMUSG00000036086	ENSMUST00000131732			Zranb3			protein_coding
Sox9_E16_Sample1_peak_1966	chr1	128102425	128103882	+	2226	NA	promoter-TSS (ENSMUST00000036288.10)	protein_coding-promoter-TSS (ENSMUST00000036288.10)	-106	ENSMUST00000097597.6	ENSMUSG00000036086	ENSMUST00000131732			Zranb3			protein_coding
Sox9_E16_Sample1_peak_1967	chr1	128243670	128244941	+	1257	NA	exon (ENSMUST00000027592.5, exon 1 of 13)	protein_coding-exon (ENSMUST00000027592.5, exon 1 of 13)	143	ENSMUST00000027592.5	ENSMUSG00000026353	ENSMUST00000189895			Ubxn4			protein_coding
Sox9_E16_Sample1_peak_1968	chr1	128358634	128360036	+	1157	NA	intron (ENSMUST00000190495.1, intron 1 of 15)	protein_coding-intron (ENSMUST00000027601.10, intron 1 of 16)	312	ENSMUST00000190495.1	ENSMUSG00000026355	ENSMUST00000191454			Mcm6			protein_coding
Sox9_E16_Sample1_peak_1970	chr1	128416630	128417669	+	636	NA	intron (ENSMUST00000064309.8, intron 1 of 3)	protein_coding-intron (ENSMUST00000027602.14, intron 1 of 15)	210	ENSMUST00000027602.14	ENSMUSG00000026356	ENSMUST00000186398			Dars			protein_coding
Sox9_E16_Sample1_peak_1971	chr1	128456788	128457507	+	137	NA	Intergenic	Intergenic	-32893	ENSMUST00000157571.1	ENSMUSG00000088196	ENSMUST00000157571			Gm23902			snoRNA
Sox9_E16_Sample1_peak_1972	chr1	128472105	128473105	+	326	NA	Intergenic	Intergenic	-17435	ENSMUST00000157571.1	ENSMUSG00000088196	ENSMUST00000157571			Gm23902			snoRNA
Sox9_E16_Sample1_peak_1973	chr1	128498206	128498831	+	293	NA	Intergenic	Intergenic	-4086	ENSMUST00000188996.1	ENSMUSG00000100152	ENSMUST00000188996			Gm29598			processed_pseudogene
Sox9_E16_Sample1_peak_1974	chr1	128535218	128536213	+	245	NA	Intergenic	Intergenic	-14255	ENSMUST00000187672.1	ENSMUSG00000100078	ENSMUST00000187672			Gm6170			processed_pseudogene
Sox9_E16_Sample1_peak_1975	chr1	128551666	128552543	+	199	NA	Intergenic	Intergenic	-30644	ENSMUST00000187672.1	ENSMUSG00000100078	ENSMUST00000187672			Gm6170			processed_pseudogene
Sox9_E16_Sample1_peak_1976	chr1	128591436	128593380	+	506	NA	promoter-TSS (ENSMUST00000052172.6)	protein_coding-promoter-TSS (ENSMUST00000052172.6)	-115	ENSMUST00000142893.1	ENSMUSG00000045382	ENSMUST00000052172			Cxcr4			protein_coding
Sox9_E16_Sample1_peak_1977	chr1	128614832	128615671	+	203	NA	Intergenic	Intergenic	-22958	ENSMUST00000142893.1	ENSMUSG00000045382	ENSMUST00000052172			Cxcr4			protein_coding
Sox9_E16_Sample1_peak_1978	chr1	128622897	128623644	+	114	NA	Intergenic	Intergenic	-30977	ENSMUST00000142893.1	ENSMUSG00000045382	ENSMUST00000052172			Cxcr4			protein_coding
Sox9_E16_Sample1_peak_1979	chr1	128649334	128650110	+	226	NA	Intergenic	Intergenic	-57429	ENSMUST00000142893.1	ENSMUSG00000045382	ENSMUST00000052172			Cxcr4			protein_coding
Sox9_E16_Sample1_peak_1980	chr1	128654179	128654677	+	82	NA	Intergenic	Intergenic	-62135	ENSMUST00000142893.1	ENSMUSG00000045382	ENSMUST00000052172			Cxcr4			protein_coding
Sox9_E16_Sample1_peak_1981	chr1	128670992	128672000	+	188	NA	Intergenic	Intergenic	-79203	ENSMUST00000142893.1	ENSMUSG00000045382	ENSMUST00000052172			Cxcr4			protein_coding
Sox9_E16_Sample1_peak_1982	chr1	128679026	128679951	+	488	NA	Intergenic	Intergenic	-71438	ENSMUST00000185285.1	ENSMUSG00000099403	ENSMUST00000185285			Gm29599			processed_pseudogene
Sox9_E16_Sample1_peak_1983	chr1	128682803	128683592	+	104	NA	Intergenic	Intergenic	-67729	ENSMUST00000185285.1	ENSMUSG00000099403	ENSMUST00000185285			Gm29599			processed_pseudogene
Sox9_E16_Sample1_peak_1985	chr1	128824189	128825000	+	271	NA	Intergenic	Intergenic	-50173	ENSMUST00000181951.1	ENSMUSG00000097283	ENSMUST00000181951			Gm26686			lncRNA
Sox9_E16_Sample1_peak_1986	chr1	128832006	128833056	+	235	NA	Intergenic	Intergenic	53488	ENSMUST00000082803.1	ENSMUSG00000064737	ENSMUST00000082803			Gm23056			snRNA
Sox9_E16_Sample1_peak_1988	chr1	129273118	129273643	+	76	NA	promoter-TSS (ENSMUST00000040311.13)	protein_coding-promoter-TSS (ENSMUST00000040311.13)	36	ENSMUST00000073527.12	ENSMUSG00000042581	ENSMUST00000190870			Thsd7b			protein_coding
Sox9_E16_Sample1_peak_1991	chr1	130298899	130300473	+	122	NA	Intergenic	Intergenic	-18428	ENSMUST00000155992.1	ENSMUSG00000086633	ENSMUST00000155992			Gm16081			lncRNA
Sox9_E16_Sample1_peak_1992	chr1	130372068	130372579	+	51	NA	Intergenic	Intergenic	50417	ENSMUST00000136497.1	ENSMUSG00000026401	ENSMUST00000136497			Cd55b			protein_coding
Sox9_E16_Sample1_peak_1993	chr1	130422040	130423142	+	224	NA	promoter-TSS (ENSMUST00000143266.1)	lncRNA-promoter-TSS (ENSMUST00000143266.1)	149	ENSMUST00000136497.1	ENSMUSG00000026401	ENSMUST00000136497			Cd55b			protein_coding
Sox9_E16_Sample1_peak_1995	chr1	130443070	130443694	+	34	NA	intron (ENSMUST00000122830.1, intron 2 of 2)	protein_coding-intron (ENSMUST00000027650.12, intron 9 of 9)	5467	ENSMUST00000122830.1	ENSMUSG00000026399	ENSMUST00000133057			Cd55			protein_coding
Sox9_E16_Sample1_peak_1996	chr1	130461858	130463057	+	1188	NA	promoter-TSS (ENSMUST00000125681.1)	lncRNA-promoter-TSS (ENSMUST00000125681.1)	-6	ENSMUST00000133057.1	ENSMUSG00000026399	ENSMUST00000133057			Cd55			protein_coding
Sox9_E16_Sample1_peak_1997	chr1	130474160	130474689	+	181	NA	exon (ENSMUST00000193111.1, exon 1 of 1)	TEC-exon (ENSMUST00000193111.1, exon 1 of 1)	681	ENSMUST00000193111.1	ENSMUSG00000103751	ENSMUST00000193111			Gm37283			TEC
Sox9_E16_Sample1_peak_1999	chr1	130508779	130509490	+	142	NA	intron (ENSMUST00000125681.1, intron 1 of 4)	lncRNA-intron (ENSMUST00000125681.1, intron 1 of 4)	35391	ENSMUST00000193111.1	ENSMUSG00000103751	ENSMUST00000193111			Gm37283			TEC
Sox9_E16_Sample1_peak_2000	chr1	130547911	130548524	+	114	NA	intron (ENSMUST00000125681.1, intron 4 of 4)	lncRNA-intron (ENSMUST00000125681.1, intron 4 of 4)	47459	ENSMUST00000082461.1	ENSMUSG00000064395	ENSMUST00000082461			Gm23623			snRNA
Sox9_E16_Sample1_peak_2001	chr1	130633648	130634463	+	365	NA	TTS (ENSMUST00000027657.13)	protein_coding-TTS (ENSMUST00000027657.13)	-4434	ENSMUST00000039862.10	ENSMUSG00000042554	ENSMUST00000128128			Zp3r			protein_coding
Sox9_E16_Sample1_peak_2003	chr1	130715324	130717744	+	1229	NA	promoter-TSS (ENSMUST00000049813.5)	protein_coding-promoter-TSS (ENSMUST00000049813.5)	704	ENSMUST00000186777.1	ENSMUSG00000026409	ENSMUST00000191301			Pfkfb2			protein_coding
Sox9_E16_Sample1_peak_2004	chr1	130731432	130732439	+	197	NA	promoter-TSS (ENSMUST00000039323.7)	protein_coding-promoter-TSS (ENSMUST00000039323.7)	-41	ENSMUST00000039323.7	ENSMUSG00000042510	ENSMUST00000039323			AA986860			protein_coding
Sox9_E16_Sample1_peak_2005	chr1	130733324	130734875	+	345	NA	intron (ENSMUST00000186185.1, intron 1 of 2)	protein_coding-intron (ENSMUST00000039323.7, intron 1 of 3)	1989	ENSMUST00000186185.1	ENSMUSG00000042510	ENSMUST00000039323			AA986860			protein_coding
Sox9_E16_Sample1_peak_2006	chr1	130740403	130741011	+	94	NA	exon (ENSMUST00000190859.1, exon 1 of 2)	protein_coding-exon (ENSMUST00000190859.1, exon 1 of 2)	435	ENSMUST00000190859.1	ENSMUSG00000042510	ENSMUST00000039323			AA986860			protein_coding
Sox9_E16_Sample1_peak_2008	chr1	130763607	130764654	+	894	NA	Intergenic	Intergenic	-2254	ENSMUST00000189150.1	ENSMUSG00000100106	ENSMUST00000189150			Gm28856			lncRNA
Sox9_E16_Sample1_peak_2009	chr1	130770003	130771142	+	525	NA	intron (ENSMUST00000189150.1, intron 2 of 3)	lncRNA-intron (ENSMUST00000189150.1, intron 2 of 3)	4188	ENSMUST00000189150.1	ENSMUSG00000100106	ENSMUST00000189150			Gm28856			lncRNA
Sox9_E16_Sample1_peak_2010	chr1	130803159	130804148	+	85	NA	intron (ENSMUST00000112477.8, intron 2 of 6)	protein_coding-intron (ENSMUST00000027670.3, intron 2 of 6)	2751	ENSMUST00000027670.3	ENSMUSG00000026415	ENSMUST00000027670			Fcamr			protein_coding
Sox9_E16_Sample1_peak_2011	chr1	130820446	130820926	+	71	NA	promoter-TSS (ENSMUST00000122968.1)	lncRNA-promoter-TSS (ENSMUST00000122968.1)	-12	ENSMUST00000122968.1	ENSMUSG00000086706	ENSMUST00000125056			Gm15848			lncRNA
Sox9_E16_Sample1_peak_2013	chr1	130838275	130838796	+	130	NA	intron (ENSMUST00000137782.1, intron 2 of 3)	protein_coding-intron (ENSMUST00000027675.13, intron 2 of 10)	9525	ENSMUST00000137782.1	ENSMUSG00000026417	ENSMUST00000133792			Pigr			protein_coding
Sox9_E16_Sample1_peak_2014	chr1	130877766	130878619	+	141	NA	promoter-TSS (ENSMUST00000126821.1)	protein_coding-promoter-TSS (ENSMUST00000126821.1)	34	ENSMUST00000126821.1	ENSMUSG00000042474	ENSMUST00000038829			Fcmr			protein_coding
Sox9_E16_Sample1_peak_2015	chr1	131045781	131046371	+	107	NA	Intergenic	Intergenic	26231	ENSMUST00000016673.5	ENSMUSG00000016529	ENSMUST00000016673			Il10			protein_coding
Sox9_E16_Sample1_peak_2016	chr1	131053119	131053523	+	52	NA	TTS (ENSMUST00000016672.10)	protein_coding-TTS (ENSMUST00000016672.10)	19205	ENSMUST00000188459.3	ENSMUSG00000016528	ENSMUST00000016672			Mapkapk2			protein_coding
Sox9_E16_Sample1_peak_2017	chr1	131060610	131062281	+	34	NA	intron (ENSMUST00000016672.10, intron 1 of 9)	protein_coding-intron (ENSMUST00000016672.10, intron 1 of 9)	11081	ENSMUST00000188459.3	ENSMUSG00000016528	ENSMUST00000016672			Mapkapk2			protein_coding
Sox9_E16_Sample1_peak_2018	chr1	131081222	131081863	+	168	NA	intron (ENSMUST00000016672.10, intron 1 of 9)	protein_coding-intron (ENSMUST00000016672.10, intron 1 of 9)	-7791	ENSMUST00000158080.1	ENSMUSG00000088705	ENSMUST00000158080			Gm25549			snRNA
Sox9_E16_Sample1_peak_2019	chr1	131083882	131084825	+	163	NA	intron (ENSMUST00000016672.10, intron 1 of 9)	protein_coding-intron (ENSMUST00000016672.10, intron 1 of 9)	7796	ENSMUST00000191688.1	ENSMUSG00000102856	ENSMUST00000191688			Gm37084			TEC
Sox9_E16_Sample1_peak_2020	chr1	131088713	131090120	+	88	NA	exon (ENSMUST00000191688.1, exon 1 of 1)	TEC-exon (ENSMUST00000191688.1, exon 1 of 1)	2733	ENSMUST00000191688.1	ENSMUSG00000102856	ENSMUST00000191688			Gm37084			TEC
Sox9_E16_Sample1_peak_2021	chr1	131095731	131097962	+	565	NA	intron (ENSMUST00000016672.10, intron 1 of 9)	protein_coding-intron (ENSMUST00000016672.10, intron 1 of 9)	980	ENSMUST00000016672.10	ENSMUSG00000016528	ENSMUST00000016672			Mapkapk2			protein_coding
Sox9_E16_Sample1_peak_2022	chr1	131107702	131108460	+	446	NA	Intergenic	Intergenic	-5336	ENSMUST00000158631.1	ENSMUSG00000089256	ENSMUST00000158631			Gm25717			misc_RNA
Sox9_E16_Sample1_peak_2025	chr1	131118608	131119263	+	200	NA	Intergenic	Intergenic	-16190	ENSMUST00000158631.1	ENSMUSG00000089256	ENSMUST00000158631			Gm25717			misc_RNA
Sox9_E16_Sample1_peak_2026	chr1	131137763	131139115	+	783	NA	promoter-TSS (ENSMUST00000016670.8)	protein_coding-promoter-TSS (ENSMUST00000016670.8)	-99	ENSMUST00000016670.8	ENSMUSG00000016526	ENSMUST00000189756			Dyrk3			protein_coding
Sox9_E16_Sample1_peak_2027	chr1	131152837	131153770	+	314	NA	exon (ENSMUST00000068791.10, exon 1 of 13)	protein_coding-exon (ENSMUST00000068791.10, exon 1 of 13)	122	ENSMUST00000139468.1	ENSMUSG00000026427	ENSMUST00000151874			Eif2d			protein_coding
Sox9_E16_Sample1_peak_2028	chr1	131181567	131182070	+	85	NA	intron (ENSMUST00000068564.14, intron 2 of 4)	protein_coding-intron (ENSMUST00000027688.14, intron 3 of 5)	15439	ENSMUST00000153651.1	ENSMUSG00000026427	ENSMUST00000151874			Eif2d			protein_coding
Sox9_E16_Sample1_peak_2029	chr1	131199979	131200737	+	34	NA	promoter-TSS (ENSMUST00000068564.14)	protein_coding-promoter-TSS (ENSMUST00000068564.14)	-223	ENSMUST00000068564.14	ENSMUSG00000026430	ENSMUST00000112442			Rassf5			protein_coding
Sox9_E16_Sample1_peak_2030	chr1	131244708	131247052	+	459	NA	promoter-TSS (ENSMUST00000027688.14)	protein_coding-promoter-TSS (ENSMUST00000027688.14)	-622	ENSMUST00000124796.1	ENSMUSG00000026430	ENSMUST00000112442			Rassf5			protein_coding
Sox9_E16_Sample1_peak_2031	chr1	131252263	131252875	+	163	NA	Intergenic	Intergenic	-6938	ENSMUST00000188115.1	ENSMUSG00000102027	ENSMUST00000188115			Gm28914			lncRNA
Sox9_E16_Sample1_peak_2032	chr1	131270148	131270644	+	39	NA	TTS (ENSMUST00000162285.1)	protein_coding-TTS (ENSMUST00000162285.1)	148	ENSMUST00000163029.1	ENSMUSG00000042349	ENSMUST00000163029			Ikbke			protein_coding
Sox9_E16_Sample1_peak_2033	chr1	131333172	131333553	+	18	NA	promoter-TSS (ENSMUST00000190336.6)	protein_coding-promoter-TSS (ENSMUST00000190336.6)	-292	ENSMUST00000190336.6	ENSMUSG00000026425	ENSMUST00000186543			Srgap2			protein_coding
Sox9_E16_Sample1_peak_2034	chr1	131344946	131346510	+	310	NA	intron (ENSMUST00000186543.6, intron 9 of 21)	protein_coding-intron (ENSMUST00000097588.8, intron 9 of 22)	-1181	ENSMUST00000188770.6	ENSMUSG00000026425	ENSMUST00000186543			Srgap2			protein_coding
Sox9_E16_Sample1_peak_2035	chr1	131421045	131421429	+	45	NA	intron (ENSMUST00000185445.2, intron 2 of 2)	protein_coding-intron (ENSMUST00000097588.8, intron 3 of 22)	-12024	ENSMUST00000191427.1	ENSMUSG00000101778	ENSMUST00000191427			Gm29488			lncRNA
Sox9_E16_Sample1_peak_2036	chr1	131427377	131427928	+	99	NA	intron (ENSMUST00000185445.2, intron 2 of 2)	protein_coding-intron (ENSMUST00000097588.8, intron 3 of 22)	-18439	ENSMUST00000191427.1	ENSMUSG00000101778	ENSMUST00000191427			Gm29488			lncRNA
Sox9_E16_Sample1_peak_2037	chr1	131525928	131528339	+	1058	NA	promoter-TSS (ENSMUST00000068613.4)	protein_coding-promoter-TSS (ENSMUST00000068613.4)	214	ENSMUST00000186543.6	ENSMUSG00000026425	ENSMUST00000186543			Srgap2			protein_coding
Sox9_E16_Sample1_peak_2039	chr1	131613263	131613912	+	138	NA	Intergenic	Intergenic	13864	ENSMUST00000190410.1	ENSMUSG00000026432	ENSMUST00000190410			Avpr1b			protein_coding
Sox9_E16_Sample1_peak_2040	chr1	131712233	131712689	+	110	NA	TTS (ENSMUST00000129905.1)	protein_coding-TTS (ENSMUST00000129905.1)	15823	ENSMUST00000130848.1	ENSMUSG00000052688	ENSMUST00000064664			Rab7b			protein_coding
Sox9_E16_Sample1_peak_2042	chr1	131743749	131744745	+	246	NA	intron (ENSMUST00000049027.9, intron 1 of 20)	protein_coding-intron (ENSMUST00000049027.9, intron 1 of 20)	209	ENSMUST00000186122.6	ENSMUSG00000042268	ENSMUST00000147800			Slc26a9			protein_coding
Sox9_E16_Sample1_peak_2043	chr1	131759492	131759816	+	27	NA	intron (ENSMUST00000186122.6, intron 11 of 15)	protein_coding-intron (ENSMUST00000049027.9, intron 12 of 20)	9163	ENSMUST00000147800.1	ENSMUSG00000042268	ENSMUST00000147800			Slc26a9			protein_coding
Sox9_E16_Sample1_peak_2044	chr1	131764335	131765754	+	275	NA	intron (ENSMUST00000049027.9, intron 18 of 20)	protein_coding-intron (ENSMUST00000049027.9, intron 18 of 20)	14553	ENSMUST00000147800.1	ENSMUSG00000042268	ENSMUST00000147800			Slc26a9			protein_coding
Sox9_E16_Sample1_peak_2045	chr1	131827533	131828792	+	451	NA	exon (ENSMUST00000086559.6, exon 1 of 11)	protein_coding-exon (ENSMUST00000086559.6, exon 1 of 11)	185	ENSMUST00000086559.6	ENSMUSG00000013275	ENSMUST00000132585			Slc41a1			protein_coding
Sox9_E16_Sample1_peak_2046	chr1	131866993	131868045	+	715	NA	promoter-TSS (ENSMUST00000125925.1)	protein_coding-promoter-TSS (ENSMUST00000125925.1)	8	ENSMUST00000125925.1	ENSMUSG00000026433	ENSMUST00000187084			Rab29			protein_coding
Sox9_E16_Sample1_peak_2047	chr1	131910094	131911424	+	603	NA	intron (ENSMUST00000189946.6, intron 1 of 6)	protein_coding-intron (ENSMUST00000062264.7, intron 1 of 6)	203	ENSMUST00000062264.7	ENSMUSG00000026434	ENSMUST00000189946			Nucks1			protein_coding
Sox9_E16_Sample1_peak_2048	chr1	131938386	131939214	+	348	NA	Intergenic	Intergenic	-5830	ENSMUST00000195496.1	ENSMUSG00000103975	ENSMUST00000195496			Gm37676			TEC
Sox9_E16_Sample1_peak_2049	chr1	131962757	131963964	+	214	NA	intron (ENSMUST00000177943.7, intron 1 of 4)	protein_coding-intron (ENSMUST00000177943.7, intron 1 of 4)	393	ENSMUST00000177943.7	ENSMUSG00000026435	ENSMUST00000185387			Slc45a3			protein_coding
Sox9_E16_Sample1_peak_2050	chr1	131970066	131970909	+	55	NA	promoter-TSS (ENSMUST00000027695.7)	protein_coding-promoter-TSS (ENSMUST00000027695.7)	-122	ENSMUST00000027695.7	ENSMUSG00000026435	ENSMUST00000185387			Slc45a3			protein_coding
Sox9_E16_Sample1_peak_2051	chr1	132007330	132008663	+	774	NA	promoter-TSS (ENSMUST00000124579.1)	protein_coding-promoter-TSS (ENSMUST00000124579.1)	-103	ENSMUST00000146188.1	ENSMUSG00000026436	ENSMUST00000131159			Elk4			protein_coding
Sox9_E16_Sample1_peak_2052	chr1	132067630	132068163	+	172	NA	promoter-TSS (ENSMUST00000046658.9)	protein_coding-promoter-TSS (ENSMUST00000046658.9)	4	ENSMUST00000161864.1	ENSMUSG00000059149	ENSMUST00000112370			Mfsd4a			protein_coding
Sox9_E16_Sample1_peak_2053	chr1	132138971	132140346	+	483	NA	promoter-TSS (ENSMUST00000027697.11)	protein_coding-promoter-TSS (ENSMUST00000027697.11)	26	ENSMUST00000027697.11	ENSMUSG00000026437	ENSMUST00000112362			Cdk18			protein_coding
Sox9_E16_Sample1_peak_2054	chr1	132151052	132151748	+	128	NA	Intergenic	Intergenic	-11716	ENSMUST00000027697.11	ENSMUSG00000026437	ENSMUST00000112362			Cdk18			protein_coding
Sox9_E16_Sample1_peak_2057	chr1	132161196	132161708	+	137	NA	Intergenic	Intergenic	-21768	ENSMUST00000027697.11	ENSMUSG00000026437	ENSMUST00000112362			Cdk18			protein_coding
Sox9_E16_Sample1_peak_2058	chr1	132190238	132190924	+	130	NA	promoter-TSS (ENSMUST00000112357.8)	protein_coding-promoter-TSS (ENSMUST00000112357.8)	-850	ENSMUST00000188169.6	ENSMUSG00000079330	ENSMUST00000191418			Lemd1			protein_coding
Sox9_E16_Sample1_peak_2058-2	chr1	132191551	132192358	+	130	NA	intron (ENSMUST00000188169.6, intron 1 of 4)	protein_coding-intron (ENSMUST00000112357.8, intron 1 of 3)	497	ENSMUST00000188175.1	ENSMUSG00000118219	ENSMUST00000188175			Gm29695			protein_coding
Sox9_E16_Sample1_peak_2059	chr1	132194842	132195379	+	70	NA	intron (ENSMUST00000188169.6, intron 1 of 4)	protein_coding-intron (ENSMUST00000112357.8, intron 1 of 3)	-2978	ENSMUST00000083501.1	ENSMUSG00000065435	ENSMUST00000083501			Mir135b			miRNA
Sox9_E16_Sample1_peak_2060	chr1	132196414	132196835	+	54	NA	intron (ENSMUST00000188169.6, intron 1 of 4)	protein_coding-intron (ENSMUST00000112357.8, intron 1 of 3)	-1464	ENSMUST00000083501.1	ENSMUSG00000065435	ENSMUST00000083501			Mir135b			miRNA
Sox9_E16_Sample1_peak_2061	chr1	132200721	132201191	+	56	NA	promoter-TSS (ENSMUST00000189062.1)	protein_coding-promoter-TSS (ENSMUST00000189062.1)	-7	ENSMUST00000189062.1	ENSMUSG00000079330	ENSMUST00000191418			Lemd1			protein_coding
Sox9_E16_Sample1_peak_2062	chr1	132211104	132212534	+	158	NA	intron (ENSMUST00000188169.6, intron 1 of 4)	protein_coding-intron (ENSMUST00000112357.8, intron 1 of 3)	7967	ENSMUST00000185223.1	ENSMUSG00000079330	ENSMUST00000191418			Lemd1			protein_coding
Sox9_E16_Sample1_peak_2063	chr1	132266936	132267574	+	163	NA	Intergenic	Intergenic	13156	ENSMUST00000185761.1	ENSMUSG00000101549	ENSMUST00000185761			Gm29630			lncRNA
Sox9_E16_Sample1_peak_2064	chr1	132269311	132269815	+	71	NA	Intergenic	Intergenic	10848	ENSMUST00000185761.1	ENSMUSG00000101549	ENSMUST00000185761			Gm29630			lncRNA
Sox9_E16_Sample1_peak_2065	chr1	132292337	132292749	+	73	NA	Intergenic	Intergenic	-6083	ENSMUST00000046071.4	ENSMUSG00000042115	ENSMUST00000046071			Klhdc8a			protein_coding
Sox9_E16_Sample1_peak_2066	chr1	132294970	132295696	+	156	NA	Intergenic	Intergenic	-3293	ENSMUST00000046071.4	ENSMUSG00000042115	ENSMUST00000046071			Klhdc8a			protein_coding
Sox9_E16_Sample1_peak_2067	chr1	132298290	132299243	+	164	NA	exon (ENSMUST00000046071.4, exon 1 of 5)	protein_coding-exon (ENSMUST00000046071.4, exon 1 of 5)	140	ENSMUST00000046071.4	ENSMUSG00000042115	ENSMUST00000046071			Klhdc8a			protein_coding
Sox9_E16_Sample1_peak_2068	chr1	132306425	132306999	+	78	NA	exon (ENSMUST00000046071.4, exon 5 of 5)	protein_coding-exon (ENSMUST00000046071.4, exon 5 of 5)	8086	ENSMUST00000046071.4	ENSMUSG00000042115	ENSMUST00000046071			Klhdc8a			protein_coding
Sox9_E16_Sample1_peak_2069	chr1	132315932	132316436	+	82	NA	promoter-TSS (ENSMUST00000072177.13)	protein_coding-promoter-TSS (ENSMUST00000072177.13)	19	ENSMUST00000128661.1	ENSMUSG00000009772	ENSMUST00000133246			Nuak2			protein_coding
Sox9_E16_Sample1_peak_2070	chr1	132317460	132318174	+	203	NA	TTS (ENSMUST00000128661.1)	protein_coding-TTS (ENSMUST00000128661.1)	1652	ENSMUST00000128661.1	ENSMUSG00000009772	ENSMUST00000133246			Nuak2			protein_coding
Sox9_E16_Sample1_peak_2070-2	chr1	132319110	132319763	+	203	NA	intron (ENSMUST00000082125.5, intron 1 of 6)	protein_coding-intron (ENSMUST00000072177.13, intron 1 of 7)	3271	ENSMUST00000128661.1	ENSMUSG00000009772	ENSMUST00000133246			Nuak2			protein_coding
Sox9_E16_Sample1_peak_2071	chr1	132333786	132334419	+	76	NA	TTS (ENSMUST00000072177.13)	protein_coding-TTS (ENSMUST00000072177.13)	6506	ENSMUST00000133246.1	ENSMUSG00000009772	ENSMUST00000133246			Nuak2			protein_coding
Sox9_E16_Sample1_peak_2072	chr1	132337373	132337671	+	60	NA	Intergenic	Intergenic	-4501	ENSMUST00000189288.1	ENSMUSG00000100658	ENSMUST00000189288			F730311O21Rik			lncRNA
Sox9_E16_Sample1_peak_2073	chr1	132355519	132355960	+	34	NA	TTS (ENSMUST00000045473.15)	protein_coding-TTS (ENSMUST00000045473.15)	9209	ENSMUST00000125439.1	ENSMUSG00000042066	ENSMUST00000125439			Tmcc2			protein_coding
Sox9_E16_Sample1_peak_2074	chr1	132391152	132391884	+	167	NA	promoter-TSS (ENSMUST00000045473.15)	protein_coding-promoter-TSS (ENSMUST00000045473.15)	-237	ENSMUST00000045473.15	ENSMUSG00000042066	ENSMUST00000125439			Tmcc2			protein_coding
Sox9_E16_Sample1_peak_2075	chr1	132417306	132418195	+	947	NA	promoter-TSS (ENSMUST00000188973.1)	protein_coding-promoter-TSS (ENSMUST00000188973.1)	146	ENSMUST00000188389.1	ENSMUSG00000042046	ENSMUST00000187092			Dstyk			protein_coding
Sox9_E16_Sample1_peak_2076	chr1	132464750	132465717	+	130	NA	exon (ENSMUST00000045110.13, exon 13 of 13)	protein_coding-exon (ENSMUST00000045110.13, exon 13 of 13)	2824	ENSMUST00000191494.1	ENSMUSG00000042046	ENSMUST00000187092			Dstyk			protein_coding
Sox9_E16_Sample1_peak_2077	chr1	132476886	132477630	+	245	NA	promoter-TSS (ENSMUST00000027700.14)	protein_coding-promoter-TSS (ENSMUST00000027700.14)	-107	ENSMUST00000190825.6	ENSMUSG00000026439	ENSMUST00000027700			Rbbp5			protein_coding
Sox9_E16_Sample1_peak_2078	chr1	132483800	132484601	+	114	NA	intron (ENSMUST00000187505.6, intron 2 of 13)	protein_coding-intron (ENSMUST00000027700.14, intron 2 of 14)	6558	ENSMUST00000189786.2	ENSMUSG00000026439	ENSMUST00000027700			Rbbp5			protein_coding
Sox9_E16_Sample1_peak_2079	chr1	132520421	132520997	+	85	NA	intron (ENSMUST00000186487.6, intron 15 of 21)	protein_coding-intron (ENSMUST00000086521.10, intron 16 of 22)	-1552	ENSMUST00000188143.1	ENSMUSG00000053024	ENSMUST00000186487			Cntn2			protein_coding
Sox9_E16_Sample1_peak_2080	chr1	132538535	132538930	+	57	NA	intron (ENSMUST00000186530.2, intron 2 of 2)	protein_coding-intron (ENSMUST00000086521.10, intron 1 of 22)	4133	ENSMUST00000190601.6	ENSMUSG00000053024	ENSMUST00000186487			Cntn2			protein_coding
Sox9_E16_Sample1_peak_2081	chr1	132541086	132541625	+	45	NA	intron (ENSMUST00000186530.2, intron 2 of 2)	protein_coding-intron (ENSMUST00000086521.10, intron 1 of 22)	1510	ENSMUST00000190601.6	ENSMUSG00000053024	ENSMUST00000186487			Cntn2			protein_coding
Sox9_E16_Sample1_peak_2082	chr1	132560826	132561402	+	107	NA	Intergenic	Intergenic	-17858	ENSMUST00000186530.2	ENSMUSG00000053024	ENSMUST00000186487			Cntn2			protein_coding
Sox9_E16_Sample1_peak_2083	chr1	132741382	132741760	+	23	NA	intron (ENSMUST00000189219.1, intron 1 of 2)	protein_coding-intron (ENSMUST00000094569.10, intron 1 of 29)	186	ENSMUST00000094569.10	ENSMUSG00000026442	ENSMUST00000186389			Nfasc			protein_coding
Sox9_E16_Sample1_peak_2085	chr1	132880205	132881102	+	71	NA	exon (ENSMUST00000027706.3, exon 1 of 2)	protein_coding-exon (ENSMUST00000027706.3, exon 1 of 2)	298	ENSMUST00000159088.1	ENSMUSG00000026443	ENSMUST00000159088			Lrrn2			protein_coding
Sox9_E16_Sample1_peak_2086	chr1	133024953	133025721	+	351	NA	promoter-TSS (ENSMUST00000067398.12)	protein_coding-promoter-TSS (ENSMUST00000067398.12)	1	ENSMUST00000186617.6	ENSMUSG00000054387	ENSMUST00000188090			Mdm4			protein_coding
Sox9_E16_Sample1_peak_2087	chr1	133033214	133034238	+	198	NA	Intergenic	Intergenic	-3165	ENSMUST00000190807.1	ENSMUSG00000054387	ENSMUST00000188090			Mdm4			protein_coding
Sox9_E16_Sample1_peak_2088	chr1	133045723	133046910	+	325	NA	exon (ENSMUST00000077730.6, exon 1 of 33)	protein_coding-exon (ENSMUST00000077730.6, exon 1 of 33)	304	ENSMUST00000145153.7	ENSMUSG00000026447	ENSMUST00000153707			Pik3c2b			protein_coding
Sox9_E16_Sample1_peak_2089	chr1	133076933	133077400	+	58	NA	intron (ENSMUST00000077730.6, intron 8 of 32)	protein_coding-intron (ENSMUST00000077730.6, intron 8 of 32)	-8761	ENSMUST00000186515.1	ENSMUSG00000101102	ENSMUST00000186515			Gm28609			lncRNA
Sox9_E16_Sample1_peak_2090	chr1	133090120	133092196	+	251	NA	intron (ENSMUST00000077730.6, intron 19 of 32)	protein_coding-intron (ENSMUST00000077730.6, intron 19 of 32)	-22753	ENSMUST00000186515.1	ENSMUSG00000101102	ENSMUST00000186515			Gm28609			lncRNA
Sox9_E16_Sample1_peak_2091	chr1	133130782	133132161	+	371	NA	exon (ENSMUST00000052529.3, exon 1 of 2)	protein_coding-exon (ENSMUST00000052529.3, exon 1 of 2)	127	ENSMUST00000122956.1	ENSMUSG00000046062	ENSMUST00000122956			Ppp1r15b			protein_coding
Sox9_E16_Sample1_peak_2093	chr1	133163914	133164666	+	142	NA	promoter-TSS (ENSMUST00000212252.1)	protein_coding-promoter-TSS (ENSMUST00000212252.1)	80	ENSMUST00000212252.1	ENSMUSG00000041757	ENSMUST00000212252			Plekha6			protein_coding
Sox9_E16_Sample1_peak_2094	chr1	133204727	133205165	+	58	NA	intron (ENSMUST00000187285.6, intron 1 of 22)	protein_coding-intron (ENSMUST00000187285.6, intron 1 of 22)	23625	ENSMUST00000187285.6	ENSMUSG00000041757	ENSMUST00000212252			Plekha6			protein_coding
Sox9_E16_Sample1_peak_2095	chr1	133226205	133227312	+	107	NA	intron (ENSMUST00000187285.6, intron 1 of 22)	protein_coding-intron (ENSMUST00000187285.6, intron 1 of 22)	-19339	ENSMUST00000105082.8	ENSMUSG00000041757	ENSMUST00000212252			Plekha6			protein_coding
Sox9_E16_Sample1_peak_2096	chr1	133236793	133237769	+	138	NA	intron (ENSMUST00000187285.6, intron 1 of 22)	protein_coding-intron (ENSMUST00000187285.6, intron 1 of 22)	-8816	ENSMUST00000105082.8	ENSMUSG00000041757	ENSMUST00000212252			Plekha6			protein_coding
Sox9_E16_Sample1_peak_2097	chr1	133245374	133246529	+	106	NA	promoter-TSS (ENSMUST00000038295.14)	protein_coding-promoter-TSS (ENSMUST00000038295.14)	-146	ENSMUST00000105082.8	ENSMUSG00000041757	ENSMUST00000212252			Plekha6			protein_coding
Sox9_E16_Sample1_peak_2098	chr1	133307027	133307462	+	51	NA	Intergenic	Intergenic	-2556	ENSMUST00000094557.6	ENSMUSG00000103421	ENSMUST00000094557			Golt1a			protein_coding
Sox9_E16_Sample1_peak_2099	chr1	133328613	133329769	+	138	NA	intron (ENSMUST00000194044.5, intron 2 of 2)	protein_coding-intron (ENSMUST00000007433.4, intron 2 of 2)	1979	ENSMUST00000178033.4	ENSMUSG00000116158	ENSMUST00000178033			Kiss1			protein_coding
Sox9_E16_Sample1_peak_2101	chr1	133363319	133364652	+	384	NA	exon (ENSMUST00000135222.8, exon 1 of 8)	protein_coding-exon (ENSMUST00000135222.8, exon 1 of 8)	409	ENSMUST00000147909.7	ENSMUSG00000070644	ENSMUST00000147909			Etnk2			protein_coding
Sox9_E16_Sample1_peak_2102	chr1	133417297	133418624	+	125	NA	intron (ENSMUST00000153799.7, intron 1 of 13)	protein_coding-intron (ENSMUST00000153799.7, intron 1 of 13)	6417	ENSMUST00000153799.7	ENSMUSG00000070643	ENSMUST00000094551			Sox13			protein_coding
Sox9_E16_Sample1_peak_2103	chr1	133423411	133424469	+	199	NA	exon (ENSMUST00000153799.7, exon 1 of 14)	protein_coding-exon (ENSMUST00000153799.7, exon 1 of 14)	437	ENSMUST00000153799.7	ENSMUSG00000070643	ENSMUST00000094551			Sox13			protein_coding
Sox9_E16_Sample1_peak_2104	chr1	133434366	133434880	+	130	NA	Intergenic	Intergenic	-10246	ENSMUST00000153799.7	ENSMUSG00000070643	ENSMUST00000094551			Sox13			protein_coding
Sox9_E16_Sample1_peak_2105	chr1	133491987	133493642	+	146	NA	Intergenic	Intergenic	-36665	ENSMUST00000188004.1	ENSMUSG00000101004	ENSMUST00000188004			Gm8596			processed_pseudogene
Sox9_E16_Sample1_peak_2106	chr1	133594691	133596042	+	107	NA	Intergenic	Intergenic	-5857	ENSMUST00000082880.1	ENSMUSG00000064814	ENSMUST00000082880			Gm23939			snoRNA
Sox9_E16_Sample1_peak_2107	chr1	133609788	133610507	+	738	NA	promoter-TSS (ENSMUST00000164574.1)	protein_coding-promoter-TSS (ENSMUST00000164574.1)	68	ENSMUST00000164574.1	ENSMUSG00000090553	ENSMUST00000166291			Snrpe			protein_coding
Sox9_E16_Sample1_peak_2108	chr1	133637584	133638772	+	130	NA	TTS (ENSMUST00000194668.5)	protein_coding-TTS (ENSMUST00000194668.5)	992	ENSMUST00000195669.1	ENSMUSG00000102976	ENSMUST00000192107			Zc3h11a			protein_coding
Sox9_E16_Sample1_peak_2109	chr1	133660729	133661686	+	339	NA	promoter-TSS (ENSMUST00000191705.5)	protein_coding-promoter-TSS (ENSMUST00000191705.5)	74	ENSMUST00000191705.5	ENSMUSG00000102976	ENSMUST00000192107			Zc3h11a			protein_coding
Sox9_E16_Sample1_peak_2110	chr1	133695456	133696505	+	207	NA	Intergenic	Intergenic	-5872	ENSMUST00000169295.7	ENSMUSG00000051998	ENSMUST00000169295			Lax1			protein_coding
Sox9_E16_Sample1_peak_2111	chr1	133744283	133745304	+	114	NA	intron (ENSMUST00000143567.7, intron 2 of 20)	protein_coding-intron (ENSMUST00000048953.13, intron 1 of 20)	8488	ENSMUST00000112264.1	ENSMUSG00000026463	ENSMUST00000125659			Atp2b4			protein_coding
Sox9_E16_Sample1_peak_2112	chr1	133767315	133767812	+	23	NA	intron (ENSMUST00000143567.7, intron 1 of 20)	protein_coding-intron (ENSMUST00000128692.1, intron 2 of 2)	10858	ENSMUST00000193173.1	ENSMUSG00000102509	ENSMUST00000193173			Gm37368			TEC
Sox9_E16_Sample1_peak_2113	chr1	133800448	133801506	+	122	NA	promoter-TSS (ENSMUST00000128692.1)	protein_coding-promoter-TSS (ENSMUST00000128692.1)	59	ENSMUST00000128692.1	ENSMUSG00000026463	ENSMUST00000125659			Atp2b4			protein_coding
Sox9_E16_Sample1_peak_2115	chr1	133863434	133863899	+	114	NA	Intergenic	Intergenic	28477	ENSMUST00000190927.1	ENSMUSG00000100830	ENSMUST00000190927			Gm28441			lncRNA
Sox9_E16_Sample1_peak_2116	chr1	133908504	133909244	+	118	NA	promoter-TSS (ENSMUST00000153617.8)	protein_coding-promoter-TSS (ENSMUST00000153617.8)	-875	ENSMUST00000153617.8	ENSMUSG00000010311	ENSMUST00000149380			Optc			protein_coding
Sox9_E16_Sample1_peak_2117	chr1	133920554	133921905	+	98	NA	intron (ENSMUST00000048432.5, intron 1 of 2)	protein_coding-intron (ENSMUST00000048432.5, intron 1 of 2)	182	ENSMUST00000127583.1	ENSMUSG00000041577	ENSMUST00000048432			Prelp			protein_coding
Sox9_E16_Sample1_peak_2118	chr1	133961503	133962174	+	130	NA	promoter-TSS (ENSMUST00000188504.1)	lncRNA-promoter-TSS (ENSMUST00000188504.1)	-324	ENSMUST00000188504.1	ENSMUSG00000100987	ENSMUST00000188504			Gm1627			lncRNA
Sox9_E16_Sample1_peak_2120	chr1	133978491	133979166	+	92	NA	Intergenic	Intergenic	16666	ENSMUST00000188504.1	ENSMUSG00000100987	ENSMUST00000188504			Gm1627			lncRNA
Sox9_E16_Sample1_peak_2121	chr1	134005852	134007223	+	508	NA	Intergenic	Intergenic	26841	ENSMUST00000186040.1	ENSMUSG00000099507	ENSMUST00000186040			Gm18970			processed_pseudogene
Sox9_E16_Sample1_peak_2122	chr1	134036914	134037884	+	122	NA	promoter-TSS (ENSMUST00000162779.1)	protein_coding-promoter-TSS (ENSMUST00000162779.1)	-97	ENSMUST00000162779.1	ENSMUSG00000041559	ENSMUST00000162779			Fmod			protein_coding
Sox9_E16_Sample1_peak_2123	chr1	134048900	134049538	+	114	NA	TTS (ENSMUST00000048183.7)	protein_coding-TTS (ENSMUST00000048183.7)	11723	ENSMUST00000162779.1	ENSMUSG00000041559	ENSMUST00000162779			Fmod			protein_coding
Sox9_E16_Sample1_peak_2124	chr1	134060673	134061444	+	487	NA	Intergenic	Intergenic	18062	ENSMUST00000020692.6	ENSMUSG00000020423	ENSMUST00000020692			Btg2			protein_coding
Sox9_E16_Sample1_peak_2126	chr1	134069889	134070939	+	270	NA	Intergenic	Intergenic	8706	ENSMUST00000020692.6	ENSMUSG00000020423	ENSMUST00000020692			Btg2			protein_coding
Sox9_E16_Sample1_peak_2127	chr1	134077786	134079984	+	287	NA	intron (ENSMUST00000020692.6, intron 1 of 1)	protein_coding-intron (ENSMUST00000020692.6, intron 1 of 1)	235	ENSMUST00000020692.6	ENSMUSG00000020423	ENSMUST00000020692			Btg2			protein_coding
Sox9_E16_Sample1_peak_2128	chr1	134092835	134093596	+	297	NA	Intergenic	Intergenic	5944	ENSMUST00000193617.1	ENSMUSG00000102380	ENSMUST00000193617			Gm38140			TEC
Sox9_E16_Sample1_peak_2129	chr1	134096193	134096884	+	159	NA	exon (ENSMUST00000193617.1, exon 1 of 1)	TEC-exon (ENSMUST00000193617.1, exon 1 of 1)	2621	ENSMUST00000193617.1	ENSMUSG00000102380	ENSMUST00000193617			Gm38140			TEC
Sox9_E16_Sample1_peak_2130	chr1	134099166	134099644	+	82	NA	promoter-TSS (ENSMUST00000193617.1)	TEC-promoter-TSS (ENSMUST00000193617.1)	-246	ENSMUST00000193617.1	ENSMUSG00000102380	ENSMUST00000193617			Gm38140			TEC
Sox9_E16_Sample1_peak_2131	chr1	134105639	134106901	+	138	NA	Intergenic	Intergenic	-3098	ENSMUST00000097570.2	ENSMUSG00000073559	ENSMUST00000097570			Gm8618			processed_pseudogene
Sox9_E16_Sample1_peak_2132	chr1	134188974	134189534	+	71	NA	exon (ENSMUST00000082060.9, exon 9 of 10)	protein_coding-exon (ENSMUST00000082060.9, exon 9 of 10)	128	ENSMUST00000134812.1	ENSMUSG00000064246	ENSMUST00000132873			Chil1			protein_coding
Sox9_E16_Sample1_peak_2133	chr1	134216984	134217449	+	71	NA	intron (ENSMUST00000187631.1, intron 2 of 2)	protein_coding-intron (ENSMUST00000038191.7, intron 1 of 1)	17362	ENSMUST00000169927.1	ENSMUSG00000042429	ENSMUST00000169927			Adora1			protein_coding
Sox9_E16_Sample1_peak_2134	chr1	134232657	134233571	+	237	NA	intron (ENSMUST00000187631.1, intron 2 of 2)	protein_coding-intron (ENSMUST00000038191.7, intron 1 of 1)	1464	ENSMUST00000169927.1	ENSMUSG00000042429	ENSMUST00000169927			Adora1			protein_coding
Sox9_E16_Sample1_peak_2135	chr1	134234676	134235534	+	120	NA	promoter-TSS (ENSMUST00000169927.1)	protein_coding-promoter-TSS (ENSMUST00000169927.1)	259	ENSMUST00000187631.1	ENSMUSG00000042429	ENSMUST00000169927			Adora1			protein_coding
Sox9_E16_Sample1_peak_2136	chr1	134243620	134244975	+	250	NA	Intergenic	Intergenic	-8866	ENSMUST00000086465.5	ENSMUSG00000042429	ENSMUST00000169927			Adora1			protein_coding
Sox9_E16_Sample1_peak_2137	chr1	134298765	134299465	+	107	NA	exon (ENSMUST00000168515.7, exon 28 of 29)	protein_coding-exon (ENSMUST00000168515.7, exon 28 of 29)	5693	ENSMUST00000189862.6	ENSMUSG00000026458	ENSMUST00000189862			Ppfia4			protein_coding
Sox9_E16_Sample1_peak_2138	chr1	134332626	134333009	+	18	NA	exon (ENSMUST00000168515.7, exon 1 of 29)	protein_coding-exon (ENSMUST00000168515.7, exon 1 of 29)	111	ENSMUST00000168515.7	ENSMUSG00000026458	ENSMUST00000189862			Ppfia4			protein_coding
Sox9_E16_Sample1_peak_2139	chr1	134344078	134344856	+	181	NA	Intergenic	Intergenic	5838	ENSMUST00000189572.1	ENSMUSG00000042305	ENSMUST00000049470			Tmem183a			protein_coding
Sox9_E16_Sample1_peak_2140	chr1	134361361	134362334	+	575	NA	promoter-TSS (ENSMUST00000185903.1)	protein_coding-promoter-TSS (ENSMUST00000185903.1)	94	ENSMUST00000191237.6	ENSMUSG00000042305	ENSMUST00000049470			Tmem183a			protein_coding
Sox9_E16_Sample1_peak_2141	chr1	134405708	134406423	+	329	NA	promoter-TSS (ENSMUST00000127412.8)	protein_coding-promoter-TSS (ENSMUST00000127412.8)	37	ENSMUST00000133686.7	ENSMUSG00000026456	ENSMUST00000173908			Cyb5r1			protein_coding
Sox9_E16_Sample1_peak_2142	chr1	134414921	134415948	+	730	NA	promoter-TSS (ENSMUST00000027727.14)	protein_coding-promoter-TSS (ENSMUST00000027727.14)	-22	ENSMUST00000112237.1	ENSMUSG00000026457	ENSMUST00000027727			Adipor1			protein_coding
Sox9_E16_Sample1_peak_2143	chr1	134455044	134455933	+	320	NA	promoter-TSS (ENSMUST00000027725.10)	protein_coding-promoter-TSS (ENSMUST00000027725.10)	-15	ENSMUST00000192012.1	ENSMUSG00000102722	ENSMUST00000192012			Gm37935			TEC
Sox9_E16_Sample1_peak_2144	chr1	134494269	134495233	+	906	NA	exon (ENSMUST00000047978.8, exon 1 of 2)	protein_coding-exon (ENSMUST00000047978.8, exon 1 of 2)	103	ENSMUST00000047978.8	ENSMUSG00000042229	ENSMUST00000047978			Rabif			protein_coding
Sox9_E16_Sample1_peak_2145	chr1	134513210	134513823	+	219	NA	Intergenic	Intergenic	-4565	ENSMUST00000179718.1	ENSMUSG00000096712	ENSMUST00000179718			Gm15454			processed_pseudogene
Sox9_E16_Sample1_peak_2146	chr1	134516697	134517091	+	74	NA	Intergenic	Intergenic	-1187	ENSMUST00000179718.1	ENSMUSG00000096712	ENSMUST00000179718			Gm15454			processed_pseudogene
Sox9_E16_Sample1_peak_2147	chr1	134555006	134557097	+	232	NA	Intergenic	Intergenic	-4120	ENSMUST00000047714.13	ENSMUSG00000042207	ENSMUST00000191572			Kdm5b			protein_coding
Sox9_E16_Sample1_peak_2148	chr1	134560241	134561415	+	104	NA	intron (ENSMUST00000047714.13, intron 1 of 26)	protein_coding-intron (ENSMUST00000047714.13, intron 1 of 26)	621	ENSMUST00000112197.2	ENSMUSG00000042207	ENSMUST00000191572			Kdm5b			protein_coding
Sox9_E16_Sample1_peak_2150	chr1	134643620	134644291	+	110	NA	exon (ENSMUST00000181197.1, exon 2 of 2)	lncRNA-exon (ENSMUST00000181197.1, exon 2 of 2)	2565	ENSMUST00000181197.1	ENSMUSG00000097435	ENSMUST00000181197			Gm26783			lncRNA
Sox9_E16_Sample1_peak_2152	chr1	134713399	134714037	+	92	NA	intron (ENSMUST00000121990.1, intron 1 of 8)	protein_coding-intron (ENSMUST00000121990.1, intron 1 of 8)	4418	ENSMUST00000121990.1	ENSMUSG00000026452	ENSMUST00000188842			Syt2			protein_coding
Sox9_E16_Sample1_peak_2153	chr1	134755014	134755762	+	74	NA	TTS (ENSMUST00000137022.1)	protein_coding-TTS (ENSMUST00000137022.1)	4965	ENSMUST00000137022.1	ENSMUSG00000073557	ENSMUST00000141419			Ppp1r12b			protein_coding
Sox9_E16_Sample1_peak_2154	chr1	134771335	134772183	+	39	NA	intron (ENSMUST00000156348.7, intron 11 of 12)	protein_coding-intron (ENSMUST00000045665.12, intron 23 of 23)	-11406	ENSMUST00000137022.1	ENSMUSG00000073557	ENSMUST00000141419			Ppp1r12b			protein_coding
Sox9_E16_Sample1_peak_2155	chr1	134783874	134784893	+	654	NA	intron (ENSMUST00000156348.7, intron 6 of 12)	protein_coding-intron (ENSMUST00000045665.12, intron 18 of 23)	-1086	ENSMUST00000191540.1	ENSMUSG00000073557	ENSMUST00000141419			Ppp1r12b			protein_coding
Sox9_E16_Sample1_peak_2156	chr1	134803486	134804610	+	155	NA	promoter-TSS (ENSMUST00000141419.1)	protein_coding-promoter-TSS (ENSMUST00000141419.1)	-197	ENSMUST00000238280.1	ENSMUSG00000073557	ENSMUST00000141419			Ppp1r12b			protein_coding
Sox9_E16_Sample1_peak_2157	chr1	134940817	134941468	+	85	NA	intron (ENSMUST00000132025.1, intron 1 of 19)	protein_coding-intron (ENSMUST00000045665.12, intron 1 of 23)	14709	ENSMUST00000168381.7	ENSMUSG00000073557	ENSMUST00000141419			Ppp1r12b			protein_coding
Sox9_E16_Sample1_peak_2158	chr1	134955286	134956233	+	639	NA	promoter-TSS (ENSMUST00000168381.7)	protein_coding-promoter-TSS (ENSMUST00000168381.7)	92	ENSMUST00000168381.7	ENSMUSG00000073557	ENSMUST00000141419			Ppp1r12b			protein_coding
Sox9_E16_Sample1_peak_2159	chr1	134962075	134963075	+	350	NA	promoter-TSS (ENSMUST00000027687.7)	protein_coding-promoter-TSS (ENSMUST00000027687.7)	10	ENSMUST00000027687.7	ENSMUSG00000026429	ENSMUST00000188177			Ube2t			protein_coding
Sox9_E16_Sample1_peak_2160	chr1	135018864	135019539	+	123	NA	intron (ENSMUST00000044828.13, intron 6 of 17)	protein_coding-intron (ENSMUST00000044828.13, intron 6 of 17)	-1422	ENSMUST00000137968.7	ENSMUSG00000042793	ENSMUST00000139369			Lgr6			protein_coding
Sox9_E16_Sample1_peak_2162	chr1	135105011	135106188	+	103	NA	promoter-TSS (ENSMUST00000044828.13)	protein_coding-promoter-TSS (ENSMUST00000044828.13)	-323	ENSMUST00000044828.13	ENSMUSG00000042793	ENSMUST00000139369			Lgr6			protein_coding
Sox9_E16_Sample1_peak_2163	chr1	135146536	135147665	+	266	NA	promoter-TSS (ENSMUST00000125774.1)	protein_coding-promoter-TSS (ENSMUST00000125774.1)	276	ENSMUST00000027684.10	ENSMUSG00000026426	ENSMUST00000123344			Arl8a			protein_coding
Sox9_E16_Sample1_peak_2164	chr1	135154365	135154890	+	51	NA	TTS (ENSMUST00000123344.1)	protein_coding-TTS (ENSMUST00000123344.1)	445	ENSMUST00000141177.1	ENSMUSG00000026426	ENSMUST00000123344			Arl8a			protein_coding
Sox9_E16_Sample1_peak_2165	chr1	135198785	135199865	+	576	NA	Intergenic	Intergenic	-31644	ENSMUST00000027682.8	ENSMUSG00000026424	ENSMUST00000027682			Gpr37l1			protein_coding
Sox9_E16_Sample1_peak_2166	chr1	135227279	135228285	+	629	NA	Intergenic	Intergenic	-4213	ENSMUST00000110798.4	ENSMUSG00000079139	ENSMUST00000110798			Gm4204			processed_pseudogene
Sox9_E16_Sample1_peak_2169	chr1	135258223	135259259	+	592	NA	promoter-TSS (ENSMUST00000003135.13)	protein_coding-promoter-TSS (ENSMUST00000003135.13)	-173	ENSMUST00000003135.13	ENSMUSG00000003051	ENSMUST00000188895			Elf3			protein_coding
Sox9_E16_Sample1_peak_2170	chr1	135283328	135284291	+	394	NA	exon (ENSMUST00000074357.7, exon 1 of 10)	protein_coding-exon (ENSMUST00000074357.7, exon 1 of 10)	275	ENSMUST00000074357.7	ENSMUSG00000041926	ENSMUST00000190632			Rnpep			protein_coding
Sox9_E16_Sample1_peak_2171	chr1	135313286	135314081	+	322	NA	promoter-TSS (ENSMUST00000081104.9)	protein_coding-promoter-TSS (ENSMUST00000081104.9)	8	ENSMUST00000134088.2	ENSMUSG00000062580	ENSMUST00000152706			Timm17a			protein_coding
Sox9_E16_Sample1_peak_2172	chr1	135324301	135325149	+	204	NA	promoter-TSS (ENSMUST00000059352.2)	protein_coding-promoter-TSS (ENSMUST00000059352.2)	-82	ENSMUST00000059352.2	ENSMUSG00000048096	ENSMUST00000059352			Lmod1			protein_coding
Sox9_E16_Sample1_peak_2173	chr1	135347426	135348206	+	130	NA	intron (ENSMUST00000059352.2, intron 1 of 2)	protein_coding-intron (ENSMUST00000059352.2, intron 1 of 2)	6006	ENSMUST00000157234.1	ENSMUSG00000087859	ENSMUST00000157234			Gm22796			snRNA
Sox9_E16_Sample1_peak_2174	chr1	135368281	135369377	+	271	NA	TTS (ENSMUST00000059352.2)	protein_coding-TTS (ENSMUST00000059352.2)	4621	ENSMUST00000159918.1	ENSMUSG00000041889	ENSMUST00000159181			Shisa4			protein_coding
Sox9_E16_Sample1_peak_2175	chr1	135374471	135375653	+	201	NA	promoter-TSS (ENSMUST00000159181.1)	protein_coding-promoter-TSS (ENSMUST00000159181.1)	15	ENSMUST00000159181.1	ENSMUSG00000041889	ENSMUST00000159181			Shisa4			protein_coding
Sox9_E16_Sample1_peak_2176	chr1	135429885	135430799	+	207	NA	promoter-TSS (ENSMUST00000159173.1)	protein_coding-promoter-TSS (ENSMUST00000159173.1)	77	ENSMUST00000159173.1	ENSMUSG00000041879	ENSMUST00000161934			Ipo9			protein_coding
Sox9_E16_Sample1_peak_2177	chr1	135498486	135498909	+	39	NA	intron (ENSMUST00000190298.7, intron 6 of 30)	protein_coding-intron (ENSMUST00000040599.14, intron 3 of 29)	11687	ENSMUST00000189362.6	ENSMUSG00000009418	ENSMUST00000112103			Nav1			protein_coding
Sox9_E16_Sample1_peak_2178	chr1	135509297	135510796	+	139	NA	intron (ENSMUST00000190298.7, intron 6 of 30)	protein_coding-intron (ENSMUST00000040599.14, intron 3 of 29)	338	ENSMUST00000189362.6	ENSMUSG00000009418	ENSMUST00000112103			Nav1			protein_coding
Sox9_E16_Sample1_peak_2180	chr1	135542313	135542670	+	18	NA	intron (ENSMUST00000190298.7, intron 4 of 30)	protein_coding-intron (ENSMUST00000040599.14, intron 1 of 29)	-17153	ENSMUST00000192904.1	ENSMUSG00000104524	ENSMUST00000192904			Gm37333			TEC
Sox9_E16_Sample1_peak_2181	chr1	135557712	135558500	+	197	NA	intron (ENSMUST00000190298.7, intron 4 of 30)	protein_coding-intron (ENSMUST00000040599.14, intron 1 of 29)	-26667	ENSMUST00000067468.5	ENSMUSG00000054412	ENSMUST00000067468			Gm4793			lncRNA
Sox9_E16_Sample1_peak_2182	chr1	135584795	135585883	+	173	NA	promoter-TSS (ENSMUST00000040599.14)	protein_coding-promoter-TSS (ENSMUST00000040599.14)	16	ENSMUST00000040599.14	ENSMUSG00000009418	ENSMUST00000112103			Nav1			protein_coding
Sox9_E16_Sample1_peak_2183	chr1	135616035	135616417	+	78	NA	intron (ENSMUST00000112103.1, intron 1 of 1)	protein_coding-intron (ENSMUST00000112103.1, intron 1 of 1)	-30521	ENSMUST00000067414.12	ENSMUSG00000009418	ENSMUST00000112103			Nav1			protein_coding
Sox9_E16_Sample1_peak_2185	chr1	135687042	135688640	+	269	NA	intron (ENSMUST00000112103.1, intron 1 of 1)	protein_coding-intron (ENSMUST00000112103.1, intron 1 of 1)	264	ENSMUST00000112103.1	ENSMUSG00000009418	ENSMUST00000112103			Nav1			protein_coding
Sox9_E16_Sample1_peak_2186	chr1	135729049	135729863	+	157	NA	intron (ENSMUST00000027677.7, intron 1 of 5)	protein_coding-intron (ENSMUST00000027677.7, intron 1 of 5)	309	ENSMUST00000027677.7	ENSMUSG00000026421	ENSMUST00000027677			Csrp1			protein_coding
Sox9_E16_Sample1_peak_2187	chr1	135731524	135732165	+	289	NA	intron (ENSMUST00000027677.7, intron 1 of 5)	protein_coding-intron (ENSMUST00000027677.7, intron 1 of 5)	2697	ENSMUST00000027677.7	ENSMUSG00000026421	ENSMUST00000027677			Csrp1			protein_coding
Sox9_E16_Sample1_peak_2188	chr1	135739508	135739933	+	64	NA	intron (ENSMUST00000097561.8, intron 2 of 5)	protein_coding-intron (ENSMUST00000027677.7, intron 2 of 5)	10573	ENSMUST00000027677.7	ENSMUSG00000026421	ENSMUST00000027677			Csrp1			protein_coding
Sox9_E16_Sample1_peak_2189	chr1	135765766	135766790	+	528	NA	promoter-TSS (ENSMUST00000136445.1)	protein_coding-promoter-TSS (ENSMUST00000136445.1)	159	ENSMUST00000038945.5	ENSMUSG00000041801	ENSMUST00000038945			Phlda3			protein_coding
Sox9_E16_Sample1_peak_2190	chr1	135818442	135819525	+	315	NA	exon (ENSMUST00000038760.9, exon 1 of 10)	protein_coding-exon (ENSMUST00000038760.9, exon 1 of 10)	385	ENSMUST00000038760.9	ENSMUSG00000041782	ENSMUST00000190773			Lad1			protein_coding
Sox9_E16_Sample1_peak_2191	chr1	135820847	135821497	+	109	NA	intron (ENSMUST00000038760.9, intron 1 of 9)	protein_coding-intron (ENSMUST00000038760.9, intron 1 of 9)	2574	ENSMUST00000038760.9	ENSMUSG00000041782	ENSMUST00000190773			Lad1			protein_coding
Sox9_E16_Sample1_peak_2193	chr1	135856978	135857487	+	85	NA	Intergenic	Intergenic	7782	ENSMUST00000188098.1	ENSMUSG00000026414	ENSMUST00000178854			Tnnt2			protein_coding
Sox9_E16_Sample1_peak_2194	chr1	135918774	135919417	+	85	NA	promoter-TSS (ENSMUST00000163260.7)	protein_coding-promoter-TSS (ENSMUST00000163260.7)	25	ENSMUST00000163260.7	ENSMUSG00000026413	ENSMUST00000189805			Pkp1			protein_coding
Sox9_E16_Sample1_peak_2195	chr1	135945012	135945811	+	64	NA	Intergenic	Intergenic	17729	ENSMUST00000140703.7	ENSMUSG00000051985	ENSMUST00000140703			Igfn1			protein_coding
Sox9_E16_Sample1_peak_2196	chr1	136007518	136008352	+	283	NA	promoter-TSS (ENSMUST00000165125.7)	protein_coding-promoter-TSS (ENSMUST00000165125.7)	-215	ENSMUST00000165125.7	ENSMUSG00000026411	ENSMUST00000117950			Tmem9			protein_coding
Sox9_E16_Sample1_peak_2197	chr1	136017713	136019030	+	475	NA	intron (ENSMUST00000117950.1, intron 1 of 5)	protein_coding-intron (ENSMUST00000063719.14, intron 1 of 5)	309	ENSMUST00000117950.1	ENSMUSG00000026411	ENSMUST00000117950			Tmem9			protein_coding
Sox9_E16_Sample1_peak_2198	chr1	136040415	136041164	+	155	NA	Intergenic	Intergenic	7535	ENSMUST00000140545.1	ENSMUSG00000026411	ENSMUST00000117950			Tmem9			protein_coding
Sox9_E16_Sample1_peak_2199	chr1	136050782	136051678	+	442	NA	exon (ENSMUST00000180436.1, exon 1 of 1)	protein_coding-exon (ENSMUST00000180436.1, exon 1 of 1)	426	ENSMUST00000180436.1	ENSMUSG00000097918	ENSMUST00000180436			Ascl5			protein_coding
Sox9_E16_Sample1_peak_2200	chr1	136085936	136086583	+	85	NA	intron (ENSMUST00000161865.1, intron 7 of 37)	protein_coding-intron (ENSMUST00000112064.7, intron 12 of 43)	12705	ENSMUST00000161865.1	ENSMUSG00000026407	ENSMUST00000112064			Cacna1s			protein_coding
Sox9_E16_Sample1_peak_2201	chr1	136130980	136131939	+	246	NA	promoter-TSS (ENSMUST00000075164.10)	protein_coding-promoter-TSS (ENSMUST00000075164.10)	5	ENSMUST00000122892.1	ENSMUSG00000041642	ENSMUST00000130864			Kif21b			protein_coding
Sox9_E16_Sample1_peak_2202	chr1	136140062	136140595	+	399	NA	intron (ENSMUST00000075164.10, intron 1 of 34)	protein_coding-intron (ENSMUST00000075164.10, intron 1 of 34)	8874	ENSMUST00000122892.1	ENSMUSG00000041642	ENSMUST00000130864			Kif21b			protein_coding
Sox9_E16_Sample1_peak_2203	chr1	136174162	136175320	+	52	NA	exon (ENSMUST00000075164.10, exon 35 of 35)	protein_coding-exon (ENSMUST00000075164.10, exon 35 of 35)	5427	ENSMUST00000165333.1	ENSMUSG00000041642	ENSMUST00000130864			Kif21b			protein_coding
Sox9_E16_Sample1_peak_2205	chr1	136219976	136220789	+	362	NA	TTS (ENSMUST00000144464.6)	protein_coding-TTS (ENSMUST00000144464.6)	4308	ENSMUST00000180496.1	ENSMUSG00000097315	ENSMUST00000180496			Gm26568			lncRNA
Sox9_E16_Sample1_peak_2206	chr1	136231808	136232416	+	83	NA	intron (ENSMUST00000120339.7, intron 1 of 9)	protein_coding-intron (ENSMUST00000120339.7, intron 1 of 9)	-1802	ENSMUST00000144464.6	ENSMUSG00000041605	ENSMUST00000150163			Inava			protein_coding
Sox9_E16_Sample1_peak_2207	chr1	136233703	136234590	+	331	NA	promoter-TSS (ENSMUST00000153910.1)	protein_coding-promoter-TSS (ENSMUST00000153910.1)	-27	ENSMUST00000153910.1	ENSMUSG00000041605	ENSMUST00000150163			Inava			protein_coding
Sox9_E16_Sample1_peak_2208	chr1	136259923	136260891	+	365	NA	exon (ENSMUST00000086395.6, exon 1 of 1)	protein_coding-exon (ENSMUST00000086395.6, exon 1 of 1)	466	ENSMUST00000086395.6	ENSMUSG00000052759	ENSMUST00000086395			Gpr25			protein_coding
Sox9_E16_Sample1_peak_2209	chr1	136325902	136326275	+	64	NA	intron (ENSMUST00000192314.1, intron 1 of 17)	protein_coding-intron (ENSMUST00000048309.11, intron 1 of 18)	19610	ENSMUST00000192001.5	ENSMUSG00000041570	ENSMUST00000048309			Camsap2			protein_coding
Sox9_E16_Sample1_peak_2210	chr1	136345389	136346705	+	519	NA	promoter-TSS (ENSMUST00000048309.11)	protein_coding-promoter-TSS (ENSMUST00000048309.11)	43	ENSMUST00000194730.1	ENSMUSG00000041570	ENSMUST00000048309			Camsap2			protein_coding
Sox9_E16_Sample1_peak_2211	chr1	136361103	136362202	+	55	NA	Intergenic	Intergenic	-15548	ENSMUST00000048309.11	ENSMUSG00000041570	ENSMUST00000048309			Camsap2			protein_coding
Sox9_E16_Sample1_peak_2212	chr1	136365892	136366303	+	107	NA	Intergenic	Intergenic	-19993	ENSMUST00000048309.11	ENSMUSG00000041570	ENSMUST00000048309			Camsap2			protein_coding
Sox9_E16_Sample1_peak_2213	chr1	136414916	136415677	+	1160	NA	promoter-TSS (ENSMUST00000027655.7)	protein_coding-promoter-TSS (ENSMUST00000027655.7)	25	ENSMUST00000027655.7	ENSMUSG00000026404	ENSMUST00000149783			Ddx59			protein_coding
Sox9_E16_Sample1_peak_2214	chr1	136465807	136466679	+	526	NA	promoter-TSS (ENSMUST00000187963.6)	protein_coding-promoter-TSS (ENSMUST00000187963.6)	-100	ENSMUST00000187963.6	ENSMUSG00000041498	ENSMUST00000195390			Kif14			protein_coding
Sox9_E16_Sample1_peak_2215	chr1	136524844	136526118	+	262	NA	intron (ENSMUST00000189413.6, intron 26 of 28)	protein_coding-intron (ENSMUST00000047817.11, intron 27 of 29)	1597	ENSMUST00000190220.1	ENSMUSG00000101413	ENSMUST00000190220			Gm29485			processed_pseudogene
Sox9_E16_Sample1_peak_2217	chr1	136555684	136556269	+	143	NA	TTS (ENSMUST00000194018.1)	lncRNA-TTS (ENSMUST00000194018.1)	14371	ENSMUST00000194018.1	ENSMUSG00000104414	ENSMUST00000194018			Gm37799			lncRNA
Sox9_E16_Sample1_peak_2218	chr1	136561724	136562506	+	440	NA	Intergenic	Intergenic	17362	ENSMUST00000193724.1	ENSMUSG00000104509	ENSMUST00000193724			Gm33994			lncRNA
Sox9_E16_Sample1_peak_2219	chr1	136614832	136615539	+	92	NA	Intergenic	Intergenic	9465	ENSMUST00000180797.1	ENSMUSG00000097229	ENSMUST00000180797			Platr23			lncRNA
Sox9_E16_Sample1_peak_2220	chr1	136624275	136625605	+	729	NA	promoter-TSS (ENSMUST00000047734.14)	protein_coding-promoter-TSS (ENSMUST00000047734.14)	39	ENSMUST00000112046.1	ENSMUSG00000041483	ENSMUST00000047734			Zfp281			protein_coding
Sox9_E16_Sample1_peak_2221	chr1	136653534	136653932	+	34	NA	Intergenic	Intergenic	-17036	ENSMUST00000180495.7	ENSMUSG00000097113	ENSMUST00000180962			Gm19705			lncRNA
Sox9_E16_Sample1_peak_2222	chr1	136661527	136662169	+	34	NA	Intergenic	Intergenic	-8921	ENSMUST00000180495.7	ENSMUSG00000097113	ENSMUST00000180962			Gm19705			lncRNA
Sox9_E16_Sample1_peak_2223	chr1	136664943	136665407	+	28	NA	Intergenic	Intergenic	-5594	ENSMUST00000180495.7	ENSMUSG00000097113	ENSMUST00000180962			Gm19705			lncRNA
Sox9_E16_Sample1_peak_2224	chr1	136670405	136671079	+	103	NA	promoter-TSS (ENSMUST00000180495.7)	lncRNA-promoter-TSS (ENSMUST00000180495.7)	-27	ENSMUST00000180495.7	ENSMUSG00000097113	ENSMUST00000180962			Gm19705			lncRNA
Sox9_E16_Sample1_peak_2225	chr1	136672248	136672599	+	75	NA	intron (ENSMUST00000180495.7, intron 1 of 4)	lncRNA-intron (ENSMUST00000180495.7, intron 1 of 4)	1654	ENSMUST00000180495.7	ENSMUSG00000097113	ENSMUST00000180962			Gm19705			lncRNA
Sox9_E16_Sample1_peak_2227	chr1	136695681	136696539	+	159	NA	promoter-TSS (ENSMUST00000181274.1)	lncRNA-promoter-TSS (ENSMUST00000181274.1)	-101	ENSMUST00000181274.1	ENSMUSG00000097448	ENSMUST00000181274			Platr22			lncRNA
Sox9_E16_Sample1_peak_2228	chr1	136698648	136699101	+	64	NA	intron (ENSMUST00000181274.1, intron 1 of 4)	lncRNA-intron (ENSMUST00000181274.1, intron 1 of 4)	1500	ENSMUST00000175171.1	ENSMUSG00000092912	ENSMUST00000175171			Gm24086			snRNA
Sox9_E16_Sample1_peak_2229	chr1	136717537	136718575	+	417	NA	intron (ENSMUST00000181274.1, intron 2 of 4)	lncRNA-intron (ENSMUST00000181274.1, intron 2 of 4)	20682	ENSMUST00000175171.1	ENSMUSG00000092912	ENSMUST00000175171			Gm24086			snRNA
Sox9_E16_Sample1_peak_2230	chr1	136768967	136769198	+	58	NA	Intergenic	Intergenic	-11473	ENSMUST00000175316.2	ENSMUSG00000096432	ENSMUST00000175316			Gm22132			miRNA
Sox9_E16_Sample1_peak_2231	chr1	136781701	136782554	+	114	NA	Intergenic	Intergenic	7393	ENSMUST00000193486.1	ENSMUSG00000104360	ENSMUST00000193486			Gm8762			processed_pseudogene
Sox9_E16_Sample1_peak_2232	chr1	136832370	136833092	+	114	NA	Intergenic	Intergenic	-33772	ENSMUST00000195232.1	ENSMUSG00000104261	ENSMUST00000195232			Gm17781			processed_pseudogene
Sox9_E16_Sample1_peak_2233	chr1	136890541	136891062	+	155	NA	exon (ENSMUST00000027649.13, exon 7 of 9)	protein_coding-exon (ENSMUST00000027649.13, exon 7 of 9)	49782	ENSMUST00000192587.1	ENSMUSG00000026398	ENSMUST00000168126			Nr5a2			protein_coding
Sox9_E16_Sample1_peak_2234	chr1	136910300	136911368	+	92	NA	intron (ENSMUST00000027649.13, intron 6 of 8)	protein_coding-intron (ENSMUST00000027649.13, intron 6 of 8)	29749	ENSMUST00000192587.1	ENSMUSG00000026398	ENSMUST00000168126			Nr5a2			protein_coding
Sox9_E16_Sample1_peak_2235	chr1	136948439	136949401	+	272	NA	exon (ENSMUST00000168126.6, exon 1 of 7)	protein_coding-exon (ENSMUST00000168126.6, exon 1 of 7)	253	ENSMUST00000195428.1	ENSMUSG00000026398	ENSMUST00000168126			Nr5a2			protein_coding
Sox9_E16_Sample1_peak_2236	chr1	136966509	136967185	+	92	NA	Intergenic	Intergenic	-6399	ENSMUST00000027649.13	ENSMUSG00000026398	ENSMUST00000168126			Nr5a2			protein_coding
Sox9_E16_Sample1_peak_2237	chr1	137079089	137080093	+	792	NA	Intergenic	Intergenic	-89321	ENSMUST00000158345.1	ENSMUSG00000088970	ENSMUST00000158345			Gm23763			snRNA
Sox9_E16_Sample1_peak_2238	chr1	137171088	137171503	+	99	NA	Intergenic	Intergenic	44352	ENSMUST00000104019.1	ENSMUSG00000077207	ENSMUST00000104019			Gm25609			snRNA
Sox9_E16_Sample1_peak_2239	chr1	137222912	137223638	+	45	NA	Intergenic	Intergenic	-7628	ENSMUST00000104019.1	ENSMUSG00000077207	ENSMUST00000104019			Gm25609			snRNA
Sox9_E16_Sample1_peak_2240	chr1	137280248	137281629	+	175	NA	Intergenic	Intergenic	28796	ENSMUST00000192624.1	ENSMUSG00000102751	ENSMUST00000192624			Gm37057			TEC
Sox9_E16_Sample1_peak_2241	chr1	137323180	137324657	+	319	NA	Intergenic	Intergenic	1924	ENSMUST00000191810.1	ENSMUSG00000102738	ENSMUST00000191810			1700006P03Rik			TEC
Sox9_E16_Sample1_peak_2242	chr1	137473779	137475067	+	471	NA	Intergenic	Intergenic	56807	ENSMUST00000192122.1	ENSMUSG00000103070	ENSMUST00000192122			Gm37903			TEC
Sox9_E16_Sample1_peak_2243	chr1	137565225	137566114	+	615	NA	Intergenic	Intergenic	-34439	ENSMUST00000192122.1	ENSMUSG00000103070	ENSMUST00000192122			Gm37903			TEC
Sox9_E16_Sample1_peak_2244	chr1	137653678	137655031	+	111	NA	Intergenic	Intergenic	-79964	ENSMUST00000158090.1	ENSMUSG00000088715	ENSMUST00000158090			Gm22727			snoRNA
Sox9_E16_Sample1_peak_2245	chr1	137706020	137707405	+	244	NA	Intergenic	Intergenic	-27606	ENSMUST00000158090.1	ENSMUSG00000088715	ENSMUST00000158090			Gm22727			snoRNA
Sox9_E16_Sample1_peak_2246	chr1	137849463	137849860	+	34	NA	Intergenic	Intergenic	37812	ENSMUST00000191658.1	ENSMUSG00000104112	ENSMUST00000191658			Gm37293			TEC
Sox9_E16_Sample1_peak_2247	chr1	137898390	137899075	+	459	NA	exon (ENSMUST00000182127.1, exon 1 of 3)	lncRNA-exon (ENSMUST00000182127.1, exon 1 of 3)	134	ENSMUST00000182127.1	ENSMUSG00000098243	ENSMUST00000182127			Gm4258			lncRNA
Sox9_E16_Sample1_peak_2248	chr1	137900022	137901428	+	306	NA	TTS (ENSMUST00000187561.1)	lncRNA-TTS (ENSMUST00000187561.1)	2127	ENSMUST00000182127.1	ENSMUSG00000098243	ENSMUST00000182127			Gm4258			lncRNA
Sox9_E16_Sample1_peak_2249	chr1	137919826	137920513	+	465	NA	intron (ENSMUST00000182971.1, intron 1 of 1)	lncRNA-intron (ENSMUST00000182127.1, intron 1 of 2)	1143	ENSMUST00000182971.1	ENSMUSG00000098045	ENSMUST00000182971			Gm26979			lncRNA
Sox9_E16_Sample1_peak_2250	chr1	137928130	137928509	+	47	NA	exon (ENSMUST00000192622.1, exon 1 of 1)	TEC-exon (ENSMUST00000192622.1, exon 1 of 1)	149	ENSMUST00000192622.1	ENSMUSG00000102277	ENSMUST00000191963			A130050O07Rik			TEC
Sox9_E16_Sample1_peak_2251	chr1	137929756	137930041	+	90	NA	exon (ENSMUST00000191963.1, exon 1 of 1)	TEC-exon (ENSMUST00000191963.1, exon 1 of 1)	1728	ENSMUST00000192622.1	ENSMUSG00000102277	ENSMUST00000191963			A130050O07Rik			TEC
Sox9_E16_Sample1_peak_2252	chr1	138028839	138029761	+	130	NA	Intergenic	Intergenic	-41524	ENSMUST00000157939.1	ENSMUSG00000088564	ENSMUST00000157939			Gm23782			rRNA
Sox9_E16_Sample1_peak_2254	chr1	138283328	138284137	+	261	NA	exon (ENSMUST00000027643.5, exon 2 of 3)	protein_coding-exon (ENSMUST00000027643.5, exon 2 of 3)	9994	ENSMUST00000027643.5	ENSMUSG00000026394	ENSMUST00000027643			Atp6v1g3			protein_coding
Sox9_E16_Sample1_peak_2255	chr1	138289599	138290671	+	227	NA	TTS (ENSMUST00000027643.5)	protein_coding-TTS (ENSMUST00000027643.5)	16397	ENSMUST00000027643.5	ENSMUSG00000026394	ENSMUST00000027643			Atp6v1g3			protein_coding
Sox9_E16_Sample1_peak_2256	chr1	138328167	138328690	+	85	NA	Intergenic	Intergenic	-48836	ENSMUST00000190286.1	ENSMUSG00000101793	ENSMUST00000190286			Gm28500			processed_pseudogene
Sox9_E16_Sample1_peak_2257	chr1	138370262	138370670	+	18	NA	Intergenic	Intergenic	-6798	ENSMUST00000190286.1	ENSMUSG00000101793	ENSMUST00000190286			Gm28500			processed_pseudogene
Sox9_E16_Sample1_peak_2258	chr1	138487495	138488245	+	151	NA	intron (ENSMUST00000027642.4, intron 7 of 7)	protein_coding-intron (ENSMUST00000027642.4, intron 7 of 7)	-27745	ENSMUST00000188729.2	ENSMUSG00000099510	ENSMUST00000188729			Gm28501			lncRNA
Sox9_E16_Sample1_peak_2259	chr1	138506983	138508116	+	280	NA	intron (ENSMUST00000186017.6, intron 7 of 9)	protein_coding-intron (ENSMUST00000027642.4, intron 7 of 7)	-8066	ENSMUST00000188729.2	ENSMUSG00000099510	ENSMUST00000188729			Gm28501			lncRNA
Sox9_E16_Sample1_peak_2261	chr1	138571595	138572259	+	99	NA	promoter-TSS (ENSMUST00000191656.1)	TEC-promoter-TSS (ENSMUST00000191656.1)	-571	ENSMUST00000191656.1	ENSMUSG00000102448	ENSMUST00000191656			Gm37101			TEC
Sox9_E16_Sample1_peak_2262	chr1	138587444	138588131	+	34	NA	intron (ENSMUST00000187407.6, intron 1 of 9)	protein_coding-intron (ENSMUST00000027642.4, intron 1 of 7)	-16431	ENSMUST00000191656.1	ENSMUSG00000102448	ENSMUST00000191656			Gm37101			TEC
Sox9_E16_Sample1_peak_2263	chr1	138617431	138620267	+	1763	NA	intron (ENSMUST00000187407.6, intron 1 of 9)	protein_coding-intron (ENSMUST00000027642.4, intron 1 of 7)	825	ENSMUST00000027642.4	ENSMUSG00000026393	ENSMUST00000191549			Nek7			protein_coding
Sox9_E16_Sample1_peak_2264	chr1	138641179	138641774	+	52	NA	intron (ENSMUST00000190707.6, intron 4 of 4)	lncRNA-intron (ENSMUST00000190707.6, intron 4 of 4)	-21335	ENSMUST00000187407.6	ENSMUSG00000026393	ENSMUST00000191549			Nek7			protein_coding
Sox9_E16_Sample1_peak_2266	chr1	138841219	138842405	+	112	NA	exon (ENSMUST00000019374.13, exon 1 of 5)	protein_coding-exon (ENSMUST00000019374.13, exon 1 of 5)	617	ENSMUST00000112026.3	ENSMUSG00000019230	ENSMUST00000192425			Lhx9			protein_coding
Sox9_E16_Sample1_peak_2267	chr1	138848206	138849202	+	223	NA	promoter-TSS (ENSMUST00000046870.12)	protein_coding-promoter-TSS (ENSMUST00000046870.12)	-127	ENSMUST00000112030.8	ENSMUSG00000019230	ENSMUST00000192425			Lhx9			protein_coding
Sox9_E16_Sample1_peak_2268	chr1	138856164	138856943	+	2518	NA	exon (ENSMUST00000193374.1, exon 1 of 3)	protein_coding-exon (ENSMUST00000193374.1, exon 1 of 3)	294	ENSMUST00000193374.1	ENSMUSG00000079283	ENSMUST00000112025			2310009B15Rik			protein_coding
Sox9_E16_Sample1_peak_2269	chr1	138911903	138913076	+	114	NA	Intergenic	Intergenic	3554	ENSMUST00000195391.1	ENSMUSG00000103850	ENSMUST00000195391			Gm3933			processed_pseudogene
Sox9_E16_Sample1_peak_2270	chr1	138928502	138930554	+	570	NA	Intergenic	Intergenic	-13485	ENSMUST00000195391.1	ENSMUSG00000103850	ENSMUST00000195391			Gm3933			processed_pseudogene
Sox9_E16_Sample1_peak_2271	chr1	138962897	138964427	+	974	NA	promoter-TSS (ENSMUST00000168527.7)	protein_coding-promoter-TSS (ENSMUST00000168527.7)	-47	ENSMUST00000168527.7	ENSMUSG00000056268	ENSMUST00000200533			Dennd1b			protein_coding
Sox9_E16_Sample1_peak_2273	chr1	138992233	138992933	+	62	NA	promoter-TSS (ENSMUST00000140747.2)	processed_pseudogene-promoter-TSS (ENSMUST00000140747.2)	-514	ENSMUST00000140747.2	ENSMUSG00000085361	ENSMUST00000140747			Gm16305			processed_pseudogene
Sox9_E16_Sample1_peak_2274	chr1	139128405	139128800	+	39	NA	intron (ENSMUST00000199634.1, intron 2 of 9)	protein_coding-intron (ENSMUST00000094505.5, intron 13 of 20)	6063	ENSMUST00000129972.1	ENSMUSG00000085481	ENSMUST00000129972			Gm16304			processed_pseudogene
Sox9_E16_Sample1_peak_2275	chr1	139156167	139156589	+	56	NA	exon (ENSMUST00000191655.1, exon 1 of 1)	TEC-exon (ENSMUST00000191655.1, exon 1 of 1)	1226	ENSMUST00000191655.1	ENSMUSG00000102243	ENSMUST00000191655			Gm37718			TEC
Sox9_E16_Sample1_peak_2276	chr1	139159623	139160213	+	62	NA	intron (ENSMUST00000200429.4, intron 17 of 19)	protein_coding-intron (ENSMUST00000094505.5, intron 18 of 20)	4766	ENSMUST00000191655.1	ENSMUSG00000102243	ENSMUST00000191655			Gm37718			TEC
Sox9_E16_Sample1_peak_2277	chr1	139162836	139163250	+	69	NA	intron (ENSMUST00000200429.4, intron 17 of 19)	protein_coding-intron (ENSMUST00000094505.5, intron 18 of 20)	7891	ENSMUST00000191655.1	ENSMUSG00000102243	ENSMUST00000191655			Gm37718			TEC
Sox9_E16_Sample1_peak_2278	chr1	139171473	139172540	+	327	NA	exon (ENSMUST00000094505.5, exon 21 of 21)	protein_coding-exon (ENSMUST00000094505.5, exon 21 of 21)	16854	ENSMUST00000191655.1	ENSMUSG00000102243	ENSMUST00000191655			Gm37718			TEC
Sox9_E16_Sample1_peak_2279	chr1	139268060	139268494	+	99	NA	intron (ENSMUST00000198445.4, intron 4 of 9)	protein_coding-intron (ENSMUST00000059825.11, intron 5 of 11)	-12515	ENSMUST00000199291.1	ENSMUSG00000063681	ENSMUST00000196402			Crb1			protein_coding
Sox9_E16_Sample1_peak_2281	chr1	139379264	139379745	+	68	NA	promoter-TSS (ENSMUST00000192824.1)	lncRNA-promoter-TSS (ENSMUST00000192824.1)	52	ENSMUST00000192824.1	ENSMUSG00000103844	ENSMUST00000192824			4933436E23Rik			lncRNA
Sox9_E16_Sample1_peak_2282	chr1	139421740	139423313	+	1271	NA	intron (ENSMUST00000039867.9, intron 1 of 10)	protein_coding-intron (ENSMUST00000039867.9, intron 1 of 10)	144	ENSMUST00000039867.9	ENSMUSG00000033964	ENSMUST00000200243			Zbtb41			protein_coding
Sox9_E16_Sample1_peak_2283	chr1	139438515	139438963	+	92	NA	intron (ENSMUST00000199011.1, intron 6 of 10)	protein_coding-intron (ENSMUST00000039867.9, intron 6 of 10)	15085	ENSMUST00000199011.1	ENSMUSG00000033964	ENSMUST00000200243			Zbtb41			protein_coding
Sox9_E16_Sample1_peak_2284	chr1	139454207	139455506	+	1626	NA	promoter-TSS (ENSMUST00000053364.11)	protein_coding-promoter-TSS (ENSMUST00000053364.11)	37	ENSMUST00000197096.1	ENSMUSG00000033952	ENSMUST00000196272			Aspm			protein_coding
Sox9_E16_Sample1_peak_2285	chr1	139805636	139806027	+	32	NA	intron (ENSMUST00000194186.5, intron 5 of 6)	protein_coding-intron (ENSMUST00000194186.5, intron 5 of 6)	18848	ENSMUST00000122621.1	ENSMUSG00000095393	ENSMUST00000122621			Gm25619			snRNA
Sox9_E16_Sample1_peak_2288	chr1	140245179	140246450	+	508	NA	promoter-TSS (ENSMUST00000119786.7)	protein_coding-promoter-TSS (ENSMUST00000119786.7)	-344	ENSMUST00000239229.1	ENSMUSG00000052726	ENSMUST00000119786			Kcnt2			protein_coding
Sox9_E16_Sample1_peak_2289	chr1	140531476	140532140	+	45	NA	intron (ENSMUST00000120796.7, intron 20 of 27)	protein_coding-intron (ENSMUST00000119786.7, intron 18 of 26)	18852	ENSMUST00000193606.1	ENSMUSG00000052726	ENSMUST00000119786			Kcnt2			protein_coding
Sox9_E16_Sample1_peak_2291	chr1	140661188	140661830	+	64	NA	Intergenic	Intergenic	-5105	ENSMUST00000193820.1	ENSMUSG00000102368	ENSMUST00000193820			4930590L20Rik			lncRNA
Sox9_E16_Sample1_peak_2293	chr1	142063790	142064600	+	197	NA	Intergenic	Intergenic	391619	ENSMUST00000191024.2	ENSMUSG00000099671	ENSMUST00000191024			Gm18183			processed_pseudogene
Sox9_E16_Sample1_peak_2295	chr1	142083932	142084600	+	83	NA	Intergenic	Intergenic	371548	ENSMUST00000191024.2	ENSMUSG00000099671	ENSMUST00000191024			Gm18183			processed_pseudogene
Sox9_E16_Sample1_peak_2296	chr1	142096809	142097226	+	39	NA	Intergenic	Intergenic	358797	ENSMUST00000191024.2	ENSMUSG00000099671	ENSMUST00000191024			Gm18183			processed_pseudogene
Sox9_E16_Sample1_peak_2297	chr1	142108651	142109716	+	454	NA	Intergenic	Intergenic	346631	ENSMUST00000191024.2	ENSMUSG00000099671	ENSMUST00000191024			Gm18183			processed_pseudogene
Sox9_E16_Sample1_peak_2298	chr1	142152728	142153261	+	99	NA	Intergenic	Intergenic	302820	ENSMUST00000191024.2	ENSMUSG00000099671	ENSMUST00000191024			Gm18183			processed_pseudogene
Sox9_E16_Sample1_peak_2299	chr1	142382038	142382971	+	343	NA	Intergenic	Intergenic	73310	ENSMUST00000191024.2	ENSMUSG00000099671	ENSMUST00000191024			Gm18183			processed_pseudogene
Sox9_E16_Sample1_peak_2300	chr1	142741913	142742726	+	186	NA	Intergenic	Intergenic	-12874	ENSMUST00000195327.1	ENSMUSG00000102818	ENSMUST00000195327			Gm37796			TEC
Sox9_E16_Sample1_peak_2302	chr1	142888753	142889129	+	59	NA	Intergenic	Intergenic	133748	ENSMUST00000195327.1	ENSMUSG00000102818	ENSMUST00000195327			Gm37796			TEC
Sox9_E16_Sample1_peak_2305	chr1	143666817	143667447	+	132	NA	intron (ENSMUST00000212510.1, intron 10 of 10)	protein_coding-intron (ENSMUST00000018337.8, intron 10 of 16)	-16098	ENSMUST00000161973.1	ENSMUSG00000089640	ENSMUST00000161973			Gm6397			processed_pseudogene
Sox9_E16_Sample1_peak_2306	chr1	143702169	143703542	+	1376	NA	promoter-TSS (ENSMUST00000018337.8)	protein_coding-promoter-TSS (ENSMUST00000018337.8)	38	ENSMUST00000018337.8	ENSMUSG00000026361	ENSMUST00000018337			Cdc73			protein_coding
Sox9_E16_Sample1_peak_2307	chr1	143709188	143710296	+	242	NA	Intergenic	Intergenic	-6596	ENSMUST00000185367.1	ENSMUSG00000018196	ENSMUST00000188783			Glrx2			protein_coding
Sox9_E16_Sample1_peak_2309	chr1	143727493	143728306	+	385	NA	intron (ENSMUST00000185367.1, intron 5 of 9)	protein_coding-intron (ENSMUST00000185367.1, intron 5 of 9)	-11130	ENSMUST00000145969.7	ENSMUSG00000018196	ENSMUST00000188783			Glrx2			protein_coding
Sox9_E16_Sample1_peak_2310	chr1	143738936	143740338	+	1271	NA	promoter-TSS (ENSMUST00000050491.10)	protein_coding-promoter-TSS (ENSMUST00000050491.10)	-9	ENSMUST00000050491.10	ENSMUSG00000018196	ENSMUST00000188783			Glrx2			protein_coding
Sox9_E16_Sample1_peak_2311	chr1	143770120	143771025	+	576	NA	exon (ENSMUST00000018343.9, exon 1 of 7)	protein_coding-exon (ENSMUST00000018343.9, exon 1 of 7)	454	ENSMUST00000018343.9	ENSMUSG00000018199	ENSMUST00000018343			Ro60			protein_coding
Sox9_E16_Sample1_peak_2312	chr1	143776574	143778077	+	1851	NA	promoter-TSS (ENSMUST00000018333.12)	protein_coding-promoter-TSS (ENSMUST00000018333.12)	4	ENSMUST00000185493.6	ENSMUSG00000018189	ENSMUST00000018333			Uchl5			protein_coding
Sox9_E16_Sample1_peak_2313	chr1	143813854	143814338	+	136	NA	Intergenic	Intergenic	19379	ENSMUST00000185539.1	ENSMUSG00000018189	ENSMUST00000018333			Uchl5			protein_coding
Sox9_E16_Sample1_peak_2314	chr1	143820338	143820895	+	51	NA	Intergenic	Intergenic	25899	ENSMUST00000185539.1	ENSMUSG00000018189	ENSMUST00000018333			Uchl5			protein_coding
Sox9_E16_Sample1_peak_2315	chr1	143878264	143878801	+	57	NA	Intergenic	Intergenic	83815	ENSMUST00000185539.1	ENSMUSG00000018189	ENSMUST00000018333			Uchl5			protein_coding
Sox9_E16_Sample1_peak_2316	chr1	143904474	143904970	+	39	NA	Intergenic	Intergenic	99310	ENSMUST00000153527.2	ENSMUSG00000026360	ENSMUST00000027606			Rgs2			protein_coding
Sox9_E16_Sample1_peak_2317	chr1	144003535	144005009	+	1402	NA	promoter-TSS (ENSMUST00000027606.3)	protein_coding-promoter-TSS (ENSMUST00000027606.3)	-111	ENSMUST00000127206.7	ENSMUSG00000026360	ENSMUST00000027606			Rgs2			protein_coding
Sox9_E16_Sample1_peak_2318	chr1	144018402	144019307	+	114	NA	Intergenic	Intergenic	-14693	ENSMUST00000127206.7	ENSMUSG00000026360	ENSMUST00000027606			Rgs2			protein_coding
Sox9_E16_Sample1_peak_2319	chr1	144197603	144198271	+	92	NA	Intergenic	Intergenic	-20565	ENSMUST00000052375.7	ENSMUSG00000051079	ENSMUST00000111941			Rgs13			protein_coding
Sox9_E16_Sample1_peak_2320	chr1	144330341	144330862	+	189	NA	Intergenic	Intergenic	-18165	ENSMUST00000187999.1	ENSMUSG00000100441	ENSMUST00000187999			Gm7266			processed_pseudogene
Sox9_E16_Sample1_peak_2321	chr1	144406380	144407287	+	183	NA	Intergenic	Intergenic	-94397	ENSMUST00000187999.1	ENSMUSG00000100441	ENSMUST00000187999			Gm7266			processed_pseudogene
Sox9_E16_Sample1_peak_2322	chr1	145018709	145019572	+	161	NA	Intergenic	Intergenic	-39555	ENSMUST00000177687.1	ENSMUSG00000096352	ENSMUST00000177687			Gm25708			miRNA
Sox9_E16_Sample1_peak_2324	chr1	146357084	146357726	+	104	NA	Intergenic	Intergenic	-63031	ENSMUST00000163646.2	ENSMUSG00000090323	ENSMUST00000163646			Gm5263			processed_pseudogene
Sox9_E16_Sample1_peak_2325	chr1	146442699	146443214	+	71	NA	intron (ENSMUST00000186665.6, intron 2 of 6)	lncRNA-intron (ENSMUST00000185686.1, intron 1 of 3)	22520	ENSMUST00000163646.2	ENSMUSG00000090323	ENSMUST00000163646			Gm5263			processed_pseudogene
Sox9_E16_Sample1_peak_2326	chr1	146497471	146498936	+	433	NA	intron (ENSMUST00000125331.1, intron 1 of 2)	protein_coding-intron (ENSMUST00000074622.10, intron 1 of 7)	465	ENSMUST00000125331.1	ENSMUSG00000035131	ENSMUST00000132847			Brinp3			protein_coding
Sox9_E16_Sample1_peak_2328	chr1	148579658	148580365	+	199	NA	Intergenic	Intergenic	71123	ENSMUST00000187360.1	ENSMUSG00000101735	ENSMUST00000187360			Gm18505			processed_pseudogene
Sox9_E16_Sample1_peak_2330	chr1	149712517	149712985	+	98	NA	Intergenic	Intergenic	-5269	ENSMUST00000157542.1	ENSMUSG00000088167	ENSMUST00000157542			Gm23535			snRNA
Sox9_E16_Sample1_peak_2331	chr1	149758388	149758891	+	102	NA	Intergenic	Intergenic	-23781	ENSMUST00000122583.1	ENSMUSG00000084532	ENSMUST00000122583			n-R5s218			rRNA
Sox9_E16_Sample1_peak_2332	chr1	149862868	149863306	+	89	NA	intron (ENSMUST00000111926.8, intron 11 of 16)	protein_coding-intron (ENSMUST00000070200.14, intron 12 of 17)	21557	ENSMUST00000104328.1	ENSMUSG00000077516	ENSMUST00000104328			n-R5s219			rRNA
Sox9_E16_Sample1_peak_2333	chr1	149912832	149913772	+	344	NA	intron (ENSMUST00000190507.1, intron 2 of 5)	protein_coding-intron (ENSMUST00000070200.14, intron 3 of 17)	9137	ENSMUST00000111926.8	ENSMUSG00000056220	ENSMUST00000111926			Pla2g4a			protein_coding
Sox9_E16_Sample1_peak_2334	chr1	149921269	149922727	+	292	NA	exon (ENSMUST00000142040.1, exon 3 of 3)	protein_coding-exon (ENSMUST00000142040.1, exon 3 of 3)	441	ENSMUST00000111926.8	ENSMUSG00000056220	ENSMUST00000111926			Pla2g4a			protein_coding
Sox9_E16_Sample1_peak_2335	chr1	149960749	149961677	+	823	NA	promoter-TSS (ENSMUST00000070200.14)	protein_coding-promoter-TSS (ENSMUST00000070200.14)	42	ENSMUST00000134676.1	ENSMUSG00000056220	ENSMUST00000111926			Pla2g4a			protein_coding
Sox9_E16_Sample1_peak_2336	chr1	150099427	150100379	+	949	NA	promoter-TSS (ENSMUST00000035065.8)	protein_coding-promoter-TSS (ENSMUST00000035065.8)	60	ENSMUST00000181460.2	ENSMUSG00000097028	ENSMUST00000181460			Ptgs2os			lncRNA
Sox9_E16_Sample1_peak_2337	chr1	150115073	150115909	+	143	NA	Intergenic	Intergenic	15159	ENSMUST00000190784.1	ENSMUSG00000032487	ENSMUST00000190784			Ptgs2			protein_coding
Sox9_E16_Sample1_peak_2338	chr1	150139628	150140339	+	77	NA	Intergenic	Intergenic	-5985	ENSMUST00000189312.1	ENSMUSG00000101199	ENSMUST00000189312			Gm9687			processed_pseudogene
Sox9_E16_Sample1_peak_2340	chr1	150216842	150217166	+	45	NA	Intergenic	Intergenic	48995	ENSMUST00000121422.1	ENSMUSG00000099875	ENSMUST00000121422			Rbm3-ps			processed_pseudogene
Sox9_E16_Sample1_peak_2342	chr1	150266335	150267125	+	138	NA	promoter-TSS (ENSMUST00000121422.1)	processed_pseudogene-promoter-TSS (ENSMUST00000121422.1)	-731	ENSMUST00000121422.1	ENSMUSG00000099875	ENSMUST00000121422			Rbm3-ps			processed_pseudogene
Sox9_E16_Sample1_peak_2343	chr1	150392488	150393863	+	2514	NA	promoter-TSS (ENSMUST00000006167.12)	protein_coding-promoter-TSS (ENSMUST00000006167.12)	-75	ENSMUST00000119161.8	ENSMUSG00000006005	ENSMUST00000124484			Tpr			protein_coding
Sox9_E16_Sample1_peak_2344	chr1	150534687	150535585	+	123	NA	Intergenic	Intergenic	-14181	ENSMUST00000186208.1	ENSMUSG00000101519	ENSMUST00000186208			Ska2l-ps			processed_pseudogene
Sox9_E16_Sample1_peak_2345	chr1	150536113	150536408	+	35	NA	Intergenic	Intergenic	-13057	ENSMUST00000186208.1	ENSMUSG00000101519	ENSMUST00000186208			Ska2l-ps			processed_pseudogene
Sox9_E16_Sample1_peak_2349	chr1	150763524	150764307	+	147	NA	intron (ENSMUST00000137197.8, intron 15 of 105)	protein_coding-intron (ENSMUST00000074783.11, intron 15 of 106)	138616	ENSMUST00000177268.1	ENSMUSG00000093650	ENSMUST00000177268			Gm20631			lncRNA
Sox9_E16_Sample1_peak_2350	chr1	150771124	150771553	+	172	NA	intron (ENSMUST00000137197.8, intron 13 of 105)	protein_coding-intron (ENSMUST00000074783.11, intron 13 of 106)	146039	ENSMUST00000177268.1	ENSMUSG00000093650	ENSMUST00000177268			Gm20631			lncRNA
Sox9_E16_Sample1_peak_2351	chr1	150800735	150801319	+	97	NA	intron (ENSMUST00000137197.8, intron 10 of 105)	protein_coding-intron (ENSMUST00000074783.11, intron 10 of 106)	175728	ENSMUST00000177268.1	ENSMUSG00000093650	ENSMUST00000177268			Gm20631			lncRNA
Sox9_E16_Sample1_peak_2352	chr1	150804490	150805200	+	128	NA	intron (ENSMUST00000074783.11, intron 9 of 106)	protein_coding-intron (ENSMUST00000074783.11, intron 9 of 106)	179546	ENSMUST00000177268.1	ENSMUSG00000093650	ENSMUST00000177268			Gm20631			lncRNA
Sox9_E16_Sample1_peak_2353	chr1	150819397	150819779	+	107	NA	intron (ENSMUST00000137197.8, intron 4 of 105)	protein_coding-intron (ENSMUST00000074783.11, intron 4 of 106)	173463	ENSMUST00000137197.8	ENSMUSG00000066842	ENSMUST00000137197			Hmcn1			protein_coding
Sox9_E16_Sample1_peak_2354	chr1	150831594	150832300	+	23	NA	intron (ENSMUST00000137197.8, intron 4 of 105)	protein_coding-intron (ENSMUST00000074783.11, intron 4 of 106)	161104	ENSMUST00000137197.8	ENSMUSG00000066842	ENSMUST00000137197			Hmcn1			protein_coding
Sox9_E16_Sample1_peak_2355	chr1	150836257	150836699	+	34	NA	intron (ENSMUST00000137197.8, intron 4 of 105)	protein_coding-intron (ENSMUST00000074783.11, intron 4 of 106)	156573	ENSMUST00000137197.8	ENSMUSG00000066842	ENSMUST00000137197			Hmcn1			protein_coding
Sox9_E16_Sample1_peak_2357	chr1	150897596	150898578	+	416	NA	intron (ENSMUST00000074783.11, intron 1 of 106)	protein_coding-intron (ENSMUST00000074783.11, intron 1 of 106)	94964	ENSMUST00000137197.8	ENSMUSG00000066842	ENSMUST00000137197			Hmcn1			protein_coding
Sox9_E16_Sample1_peak_2358	chr1	150936770	150937415	+	91	NA	intron (ENSMUST00000074783.11, intron 1 of 106)	protein_coding-intron (ENSMUST00000074783.11, intron 1 of 106)	55959	ENSMUST00000137197.8	ENSMUSG00000066842	ENSMUST00000137197			Hmcn1			protein_coding
Sox9_E16_Sample1_peak_2360	chr1	150976044	150976729	+	64	NA	intron (ENSMUST00000074783.11, intron 1 of 106)	protein_coding-intron (ENSMUST00000074783.11, intron 1 of 106)	16665	ENSMUST00000137197.8	ENSMUSG00000066842	ENSMUST00000137197			Hmcn1			protein_coding
Sox9_E16_Sample1_peak_2361	chr1	150991848	150993869	+	618	NA	exon (ENSMUST00000074783.11, exon 1 of 107)	protein_coding-exon (ENSMUST00000074783.11, exon 1 of 107)	193	ENSMUST00000137197.8	ENSMUSG00000066842	ENSMUST00000137197			Hmcn1			protein_coding
Sox9_E16_Sample1_peak_2362	chr1	151000441	151001149	+	107	NA	promoter-TSS (ENSMUST00000191173.1)	lncRNA-promoter-TSS (ENSMUST00000191173.1)	-245	ENSMUST00000191173.1	ENSMUSG00000099622	ENSMUST00000191173			Gm29188			lncRNA
[truncated: 39,045 more rows]
