# Supplementary material for: PI3K signaling specifies proximal-distal fate by driving a developmental gene regulatory network in SOX9+ mouse lung progenitors
Source: eLife. 2022 Aug 17;11:e67954. doi: 10.7554/eLife.67954 (PMC9427112; doi:10.7554/eLife.67954)
Supplement: Supplementary file 4. [file elife-67954-supp4.xlsx]

## Sheet: Sheet1
Supplemental File 4. Annotated E11.5 Differentially Accessible Regions.
PeakID	Chr	Start	End	Strand	Peak Score	Focus Ratio/Region Size	Annotation	Detailed Annotation	Distance to TSS	Nearest PromoterID	Entrez ID	Nearest Unigene	Nearest Refseq	Nearest Ensembl	Gene Name	Gene Alias	Gene Description	Gene Type
e11ve16_cond1_180	chr1	3670888	3672565	+	16.0701	NA	promoter-TSS (ENSMUST00000070533.4)	protein_coding-promoter-TSS (ENSMUST00000070533.4)	-228	ENSMUST00000070533.4	ENSMUSG00000051951	ENSMUST00000070533			Xkr4			protein_coding
e11ve16_cond1_181	chr1	3956047	3956410	+	4.54893	NA	intron (ENSMUST00000194643.1, intron 2 of 2)	lncRNA-intron (ENSMUST00000194643.1, intron 2 of 2)	29756	ENSMUST00000192427.1	ENSMUSG00000102343	ENSMUST00000194643			Gm37381			lncRNA
e11ve16_cond1_182	chr1	4258247	4258512	+	3.7986	NA	intron (ENSMUST00000195384.1, intron 1 of 1)	processed_pseudogene-intron (ENSMUST00000195384.1, intron 1 of 1)	2140	ENSMUST00000195384.1	ENSMUSG00000102948	ENSMUST00000195384			Gm6101			processed_pseudogene
e11ve16_cond1_183	chr1	4474003	4474366	+	8.84796	NA	Intergenic	Intergenic	19420	ENSMUST00000192505.1	ENSMUSG00000025902	ENSMUST00000191647			Sox17			protein_coding
e11ve16_cond1_184	chr1	4491866	4492225	+	3.99558	NA	TTS (ENSMUST00000191647.1)	protein_coding-TTS (ENSMUST00000191647.1)	1559	ENSMUST00000192505.1	ENSMUSG00000025902	ENSMUST00000191647			Sox17			protein_coding
e11ve16_cond1_185	chr1	4492493	4493690	+	6.13516	NA	exon (ENSMUST00000192505.1, exon 1 of 1)	protein_coding-exon (ENSMUST00000192505.1, exon 1 of 1)	513	ENSMUST00000192505.1	ENSMUSG00000025902	ENSMUST00000191647			Sox17			protein_coding
e11ve16_cond1_186	chr1	4497095	4497719	+	5.11718	NA	promoter-TSS (ENSMUST00000027035.9)	protein_coding-promoter-TSS (ENSMUST00000027035.9)	-53	ENSMUST00000192650.5	ENSMUSG00000025902	ENSMUST00000191647			Sox17			protein_coding
e11ve16_cond1_187	chr1	4768070	4768520	+	7.8443	NA	Intergenic	Intergenic	-2836	ENSMUST00000193658.1	ENSMUSG00000103922	ENSMUST00000193658			Gm6123			processed_pseudogene
e11ve16_cond1_188	chr1	5018185	5020504	+	9.16726	NA	promoter-TSS (ENSMUST00000119256.7)	protein_coding-promoter-TSS (ENSMUST00000119256.7)	35	ENSMUST00000170566.1	ENSMUSG00000002459	ENSMUST00000156289			Rgs20			protein_coding
e11ve16_cond1_189	chr1	5072213	5073160	+	6.57326	NA	intron (ENSMUST00000192847.5, intron 1 of 12)	protein_coding-intron (ENSMUST00000192847.5, intron 1 of 12)	-2401	ENSMUST00000118000.7	ENSMUSG00000002459	ENSMUST00000156289			Rgs20			protein_coding
e11ve16_cond1_190	chr1	5109548	5112720	+	44.8871	NA	intron (ENSMUST00000192847.5, intron 7 of 12)	protein_coding-intron (ENSMUST00000044369.12, intron 7 of 13)	27970	ENSMUST00000192142.1	ENSMUSG00000033793	ENSMUST00000192847			Atp6v1h			protein_coding
e11ve16_cond1_191	chr1	5588611	5588997	+	4.8335	NA	promoter-TSS (ENSMUST00000160339.1)	protein_coding-promoter-TSS (ENSMUST00000160339.1)	-137	ENSMUST00000160339.1	ENSMUSG00000025905	ENSMUST00000239100			Oprk1			protein_coding
e11ve16_cond1_192	chr1	5915528	5917970	+	7.98503	NA	exon (ENSMUST00000044180.4, exon 1 of 1)	protein_coding-exon (ENSMUST00000044180.4, exon 1 of 1)	649	ENSMUST00000044180.4	ENSMUSG00000033774	ENSMUST00000044180			Npbwr1			protein_coding
e11ve16_cond1_193	chr1	6076804	6077086	+	6.53379	NA	Intergenic	Intergenic	-26900	ENSMUST00000191956.1	ENSMUSG00000103090	ENSMUST00000191956			Gm19214			processed_pseudogene
e11ve16_cond1_194	chr1	6190307	6190768	+	6.01109	NA	Intergenic	Intergenic	-15660	ENSMUST00000159906.7	ENSMUSG00000025907	ENSMUST00000161327			Rb1cc1			protein_coding
e11ve16_cond1_195	chr1	6668382	6669054	+	6.88879	NA	intron (ENSMUST00000131494.7, intron 2 of 22)	protein_coding-intron (ENSMUST00000131494.7, intron 2 of 22)	-61333	ENSMUST00000043578.12	ENSMUSG00000033740	ENSMUST00000131494			St18			protein_coding
e11ve16_cond1_196	chr1	6731781	6732001	+	5.29963	NA	intron (ENSMUST00000151281.7, intron 1 of 21)	protein_coding-intron (ENSMUST00000151281.7, intron 1 of 21)	1789	ENSMUST00000151281.7	ENSMUSG00000033740	ENSMUST00000131494			St18			protein_coding
e11ve16_cond1_197	chr1	6750815	6751348	+	3.88755	NA	intron (ENSMUST00000163727.3, intron 1 of 21)	protein_coding-intron (ENSMUST00000140079.7, intron 3 of 23)	13506	ENSMUST00000163727.3	ENSMUSG00000033740	ENSMUST00000131494			St18			protein_coding
e11ve16_cond1_198	chr1	6937118	6937508	+	5.63046	NA	Intergenic	Intergenic	7554	ENSMUST00000191703.1	ENSMUSG00000103282	ENSMUST00000191703			Gm37275			processed_pseudogene
e11ve16_cond1_199	chr1	7476675	7476930	+	5.38699	NA	Intergenic	Intergenic	-21166	ENSMUST00000194886.1	ENSMUSG00000103067	ENSMUST00000194886			Gm30414			lncRNA
e11ve16_cond1_200	chr1	7776830	7778336	+	12.3384	NA	Intergenic	Intergenic	-47018	ENSMUST00000194872.1	ENSMUSG00000103557	ENSMUST00000194872			Gm38216			processed_pseudogene
e11ve16_cond1_201	chr1	9298501	9299876	+	8.14152	NA	promoter-TSS (ENSMUST00000126083.1)	protein_coding-promoter-TSS (ENSMUST00000126083.1)	50	ENSMUST00000140295.7	ENSMUSG00000025909	ENSMUST00000135046			Sntg1			protein_coding
e11ve16_cond1_202	chr1	9469668	9469874	+	3.52995	NA	Intergenic	Intergenic	11101	ENSMUST00000083691.1	ENSMUSG00000065625	ENSMUST00000083691			Gm24765			snRNA
e11ve16_cond1_203	chr1	9530533	9530818	+	6.97024	NA	Intergenic	Intergenic	-14733	ENSMUST00000072079.8	ENSMUSG00000061024	ENSMUST00000072079			Rrs1			protein_coding
e11ve16_cond1_204	chr1	9535385	9536348	+	9.1432	NA	Intergenic	Intergenic	-9542	ENSMUST00000072079.8	ENSMUSG00000061024	ENSMUST00000072079			Rrs1			protein_coding
e11ve16_cond1_205	chr1	9755501	9756617	+	8.77302	NA	intron (ENSMUST00000181821.7, intron 2 of 3)	lncRNA-intron (ENSMUST00000181358.7, intron 2 of 6)	7433	ENSMUST00000209020.1	ENSMUSG00000097893	ENSMUST00000209020			1700034P13Rik			lncRNA
e11ve16_cond1_206	chr1	9931817	9932138	+	3.91594	NA	promoter-TSS (ENSMUST00000183059.1)	protein_coding-promoter-TSS (ENSMUST00000183059.1)	-143	ENSMUST00000183059.1	ENSMUSG00000046101	ENSMUST00000183059			Mcmdc2			protein_coding
e11ve16_cond1_207	chr1	9942966	9943645	+	4.77466	NA	promoter-TSS (ENSMUST00000175437.1)	snoRNA-promoter-TSS (ENSMUST00000175437.1)	-82	ENSMUST00000182819.7	ENSMUSG00000098234	ENSMUST00000182580			Snhg6			lncRNA
e11ve16_cond1_208	chr1	10038428	10039035	+	6.25259	NA	promoter-TSS (ENSMUST00000027050.9)	protein_coding-promoter-TSS (ENSMUST00000027050.9)	469	ENSMUST00000117415.7	ENSMUSG00000056763	ENSMUST00000186294			Cspp1			protein_coding
e11ve16_cond1_209	chr1	10131673	10131934	+	5.33722	NA	intron (ENSMUST00000187226.6, intron 7 of 9)	protein_coding-intron (ENSMUST00000071087.11, intron 26 of 29)	1844	ENSMUST00000136898.1	ENSMUSG00000056763	ENSMUST00000186294			Cspp1			protein_coding
e11ve16_cond1_210	chr1	10231722	10232165	+	4.97967	NA	intron (ENSMUST00000131556.1, intron 1 of 19)	protein_coding-intron (ENSMUST00000088615.10, intron 1 of 37)	727	ENSMUST00000088615.10	ENSMUSG00000067851	ENSMUST00000187417			Arfgef1			protein_coding
e11ve16_cond1_211	chr1	10285987	10286527	+	7.39647	NA	Intergenic	Intergenic	-53587	ENSMUST00000131556.1	ENSMUSG00000067851	ENSMUST00000187417			Arfgef1			protein_coding
e11ve16_cond1_212	chr1	10337305	10338754	+	7.51635	NA	intron (ENSMUST00000153695.7, intron 7 of 9)	protein_coding-intron (ENSMUST00000035577.6, intron 8 of 10)	-105359	ENSMUST00000131556.1	ENSMUSG00000067851	ENSMUST00000187417			Arfgef1			protein_coding
e11ve16_cond1_213	chr1	10397218	10397586	+	6.81678	NA	intron (ENSMUST00000153695.7, intron 7 of 9)	protein_coding-intron (ENSMUST00000035577.6, intron 8 of 10)	54587	ENSMUST00000194845.1	ENSMUSG00000103810	ENSMUST00000194845			Gm38005			TEC
e11ve16_cond1_214	chr1	11340249	11341122	+	14.7954	NA	Intergenic	Intergenic	26279	ENSMUST00000193623.1	ENSMUSG00000103494	ENSMUST00000193623			Gm37410			TEC
e11ve16_cond1_215	chr1	11415062	11415320	+	5.07695	NA	intron (ENSMUST00000150870.7, intron 1 of 1)	protein_coding-intron (ENSMUST00000150870.7, intron 1 of 1)	682	ENSMUST00000179089.7	ENSMUSG00000057715	ENSMUST00000048613			A830018L16Rik			protein_coding
e11ve16_cond1_216	chr1	11624194	11624784	+	8.40541	NA	intron (ENSMUST00000179089.7, intron 7 of 12)	protein_coding-intron (ENSMUST00000141512.7, intron 7 of 10)	-16089	ENSMUST00000188880.1	ENSMUSG00000099845	ENSMUST00000188880			Gm29273			processed_pseudogene
e11ve16_cond1_217	chr1	11982993	11983638	+	6.6779	NA	Intergenic	Intergenic	-137645	ENSMUST00000187748.1	ENSMUSG00000101610	ENSMUST00000187748			Gm7560			processed_pseudogene
e11ve16_cond1_218	chr1	11983816	11984069	+	4.17845	NA	Intergenic	Intergenic	-137018	ENSMUST00000187748.1	ENSMUSG00000101610	ENSMUST00000187748			Gm7560			processed_pseudogene
e11ve16_cond1_219	chr1	12398361	12398563	+	4.1308	NA	Intergenic	Intergenic	23526	ENSMUST00000179834.1	ENSMUSG00000093864	ENSMUST00000179834			Gm22633			snRNA
e11ve16_cond1_220	chr1	12435507	12436577	+	5.44405	NA	Intergenic	Intergenic	10056	ENSMUST00000183490.1	ENSMUSG00000098555	ENSMUST00000183490			Mir6341			miRNA
e11ve16_cond1_221	chr1	12691965	12692862	+	4.72644	NA	promoter-TSS (ENSMUST00000180062.7)	protein_coding-promoter-TSS (ENSMUST00000180062.7)	90	ENSMUST00000180062.7	ENSMUSG00000016918	ENSMUST00000189541			Sulf1			protein_coding
e11ve16_cond1_222	chr1	12693067	12693452	+	5.70786	NA	intron (ENSMUST00000180062.7, intron 1 of 20)	protein_coding-intron (ENSMUST00000177608.7, intron 1 of 21)	727	ENSMUST00000186051.6	ENSMUSG00000016918	ENSMUST00000189541			Sulf1			protein_coding
e11ve16_cond1_223	chr1	12710728	12711756	+	5.88178	NA	intron (ENSMUST00000180062.7, intron 1 of 20)	protein_coding-intron (ENSMUST00000177608.7, intron 1 of 21)	-7217	ENSMUST00000187376.6	ENSMUSG00000016918	ENSMUST00000189541			Sulf1			protein_coding
e11ve16_cond1_224	chr1	12811187	12811948	+	6.60946	NA	intron (ENSMUST00000177608.7, intron 7 of 21)	protein_coding-intron (ENSMUST00000088585.9, intron 7 of 21)	-24461	ENSMUST00000189447.1	ENSMUSG00000016918	ENSMUST00000189541			Sulf1			protein_coding
e11ve16_cond1_225	chr1	12836240	12836872	+	7.15478	NA	intron (ENSMUST00000177608.7, intron 13 of 21)	protein_coding-intron (ENSMUST00000088585.9, intron 13 of 21)	528	ENSMUST00000189447.1	ENSMUSG00000016918	ENSMUST00000189541			Sulf1			protein_coding
e11ve16_cond1_226	chr1	12990390	12992667	+	6.93652	NA	promoter-TSS (ENSMUST00000115402.7)	protein_coding-promoter-TSS (ENSMUST00000115402.7)	-351	ENSMUST00000115402.7	ENSMUSG00000025938	ENSMUST00000133201			Slco5a1			protein_coding
e11ve16_cond1_227	chr1	13100515	13100768	+	4.57341	NA	Intergenic	Intergenic	26522	ENSMUST00000047577.6	ENSMUSG00000042414	ENSMUST00000047577			Prdm14			protein_coding
e11ve16_cond1_228	chr1	13124983	13125487	+	5.73971	NA	exon (ENSMUST00000047577.6, exon 2 of 8)	protein_coding-exon (ENSMUST00000047577.6, exon 2 of 8)	1928	ENSMUST00000047577.6	ENSMUSG00000042414	ENSMUST00000047577			Prdm14			protein_coding
e11ve16_cond1_229	chr1	13125601	13126175	+	5.5457	NA	intron (ENSMUST00000047577.6, intron 1 of 7)	protein_coding-intron (ENSMUST00000047577.6, intron 1 of 7)	1275	ENSMUST00000047577.6	ENSMUSG00000042414	ENSMUST00000047577			Prdm14			protein_coding
e11ve16_cond1_230	chr1	13126301	13127319	+	5.59504	NA	intron (ENSMUST00000047577.6, intron 1 of 7)	protein_coding-intron (ENSMUST00000047577.6, intron 1 of 7)	353	ENSMUST00000047577.6	ENSMUSG00000042414	ENSMUST00000047577			Prdm14			protein_coding
e11ve16_cond1_231	chr1	13128212	13128868	+	7.25874	NA	Intergenic	Intergenic	-1377	ENSMUST00000047577.6	ENSMUSG00000042414	ENSMUST00000047577			Prdm14			protein_coding
e11ve16_cond1_232	chr1	13238680	13238915	+	7.78745	NA	intron (ENSMUST00000145280.1, intron 1 of 3)	protein_coding-intron (ENSMUST00000139970.7, intron 2 of 6)	-2363	ENSMUST00000195811.1	ENSMUSG00000103495	ENSMUST00000195811			Gm37409			TEC
e11ve16_cond1_233	chr1	14308622	14309486	+	5.34605	NA	intron (ENSMUST00000080664.13, intron 1 of 16)	protein_coding-intron (ENSMUST00000027066.12, intron 1 of 17)	782	ENSMUST00000187790.1	ENSMUSG00000025932	ENSMUST00000188857			Eya1			protein_coding
e11ve16_cond1_234	chr1	14869285	14870026	+	5.0166	NA	Intergenic	Intergenic	4583	ENSMUST00000121367.1	ENSMUSG00000082193	ENSMUST00000121367			Rpl5-ps1			processed_pseudogene
e11ve16_cond1_235	chr1	15017732	15017975	+	3.64825	NA	Intergenic	Intergenic	1306	ENSMUST00000157534.1	ENSMUSG00000088159	ENSMUST00000157534			Gm26345			snoRNA
e11ve16_cond1_236	chr1	15296789	15297099	+	4.92002	NA	intron (ENSMUST00000175681.2, intron 1 of 2)	protein_coding-intron (ENSMUST00000175681.2, intron 1 of 2)	9690	ENSMUST00000175681.2	ENSMUSG00000092083	ENSMUST00000170146			Kcnb2			protein_coding
e11ve16_cond1_237	chr1	15306920	15307902	+	5.12041	NA	intron (ENSMUST00000175681.2, intron 1 of 2)	protein_coding-intron (ENSMUST00000175681.2, intron 1 of 2)	-5041	ENSMUST00000170146.2	ENSMUSG00000092083	ENSMUST00000170146			Kcnb2			protein_coding
e11ve16_cond1_238	chr1	15791211	15791582	+	5.28273	NA	Intergenic	Intergenic	-14250	ENSMUST00000188371.6	ENSMUSG00000025925	ENSMUST00000188684			Terf1			protein_coding
e11ve16_cond1_239	chr1	15893143	15893402	+	3.70298	NA	promoter-TSS (ENSMUST00000040695.4)	protein_coding-promoter-TSS (ENSMUST00000040695.4)	-550	ENSMUST00000040695.4	ENSMUSG00000032719	ENSMUST00000040695			Sbspon			protein_coding
e11ve16_cond1_240	chr1	15996359	15996748	+	6.0135	NA	Intergenic	Intergenic	-56782	ENSMUST00000185778.1	ENSMUSG00000100652	ENSMUST00000185778			Gm7634			processed_pseudogene
e11ve16_cond1_241	chr1	16212308	16213276	+	7.82244	NA	Intergenic	Intergenic	-2275	ENSMUST00000192560.1	ENSMUSG00000104165	ENSMUST00000192560			Gm38249			TEC
e11ve16_cond1_242	chr1	16234698	16235986	+	10.9872	NA	intron (ENSMUST00000162627.7, intron 12 of 13)	protein_coding-intron (ENSMUST00000027052.12, intron 11 of 12)	6836	ENSMUST00000186343.1	ENSMUSG00000100868	ENSMUST00000186343			Gm28095			lncRNA
e11ve16_cond1_243	chr1	16249175	16250117	+	5.86231	NA	intron (ENSMUST00000162627.7, intron 12 of 13)	protein_coding-intron (ENSMUST00000027052.12, intron 11 of 12)	-3946	ENSMUST00000160446.7	ENSMUSG00000089982	ENSMUST00000159190			Gm7568			lncRNA
e11ve16_cond1_244	chr1	16519210	16519782	+	30.7359	NA	promoter-TSS (ENSMUST00000027052.12)	protein_coding-promoter-TSS (ENSMUST00000027052.12)	-189	ENSMUST00000149320.8	ENSMUSG00000025920	ENSMUST00000162007			Stau2			protein_coding
e11ve16_cond1_245	chr1	17098829	17099110	+	6.20005	NA	Intergenic	Intergenic	-1080	ENSMUST00000038382.4	ENSMUSG00000042686	ENSMUST00000186024			Jph1			protein_coding
e11ve16_cond1_246	chr1	17145296	17145586	+	5.264	NA	promoter-TSS (ENSMUST00000026879.7)	protein_coding-promoter-TSS (ENSMUST00000026879.7)	-27	ENSMUST00000189736.1	ENSMUSG00000025777	ENSMUST00000189736			Gdap1			protein_coding
e11ve16_cond1_247	chr1	17415903	17416700	+	18.2659	NA	Intergenic	Intergenic	13227	ENSMUST00000186816.1	ENSMUSG00000102048	ENSMUST00000186816			Gm6075			processed_pseudogene
e11ve16_cond1_248	chr1	17629330	17629710	+	5.0552	NA	exon (ENSMUST00000088476.3, exon 6 of 6)	protein_coding-exon (ENSMUST00000088476.3, exon 6 of 6)	11561	ENSMUST00000186267.1	ENSMUSG00000100053	ENSMUST00000186267			Gm28154			lncRNA
e11ve16_cond1_249	chr1	17726865	17728186	+	8.79773	NA	promoter-TSS (ENSMUST00000149914.1)	lncRNA-promoter-TSS (ENSMUST00000149914.1)	121	ENSMUST00000127328.1	ENSMUSG00000085125	ENSMUST00000149914			Gm16070			lncRNA
e11ve16_cond1_250	chr1	18057341	18058961	+	15.3181	NA	intron (ENSMUST00000188360.1, intron 1 of 1)	transcribed_unprocessed_pseudogene-intron (ENSMUST00000188360.1, intron 1 of 1)	118	ENSMUST00000188360.1	ENSMUSG00000101717	ENSMUST00000188360			Gm45784			transcribed_unprocessed_pseudogene
e11ve16_cond1_251	chr1	18223321	18223646	+	4.61679	NA	promoter-TSS (ENSMUST00000126871.1)	unprocessed_pseudogene-promoter-TSS (ENSMUST00000126871.1)	81	ENSMUST00000126871.1	ENSMUSG00000070977	ENSMUST00000126871			Defb44-ps			unprocessed_pseudogene
e11ve16_cond1_252	chr1	19104283	19104870	+	5.61653	NA	exon (ENSMUST00000037294.7, exon 2 of 8)	protein_coding-exon (ENSMUST00000037294.7, exon 2 of 8)	264	ENSMUST00000159108.2	ENSMUSG00000089787	ENSMUST00000159108			Gm15825			lncRNA
e11ve16_cond1_253	chr1	19210417	19211477	+	6.86802	NA	intron (ENSMUST00000187754.6, intron 1 of 7)	protein_coding-intron (ENSMUST00000027059.10, intron 1 of 6)	-1107	ENSMUST00000064976.5	ENSMUSG00000025927	ENSMUST00000187754			Tfap2b			protein_coding
e11ve16_cond1_254	chr1	19234825	19235423	+	11.1009	NA	TTS (ENSMUST00000064976.5)	protein_coding-TTS (ENSMUST00000064976.5)	-7601	ENSMUST00000189218.1	ENSMUSG00000100538	ENSMUST00000189218			Gm28340			lncRNA
e11ve16_cond1_255	chr1	19241088	19241564	+	8.3343	NA	Intergenic	Intergenic	-1399	ENSMUST00000189218.1	ENSMUSG00000100538	ENSMUST00000189218			Gm28340			lncRNA
e11ve16_cond1_256	chr1	20138693	20139318	+	5.0665	NA	intron (ENSMUST00000088448.11, intron 60 of 66)	protein_coding-intron (ENSMUST00000088448.11, intron 60 of 66)	-73457	ENSMUST00000194347.1	ENSMUSG00000104095	ENSMUST00000194347			Gm37315			TEC
e11ve16_cond1_257	chr1	20478239	20478628	+	3.72659	NA	intron (ENSMUST00000088448.11, intron 35 of 66)	protein_coding-intron (ENSMUST00000088448.11, intron 35 of 66)	-33521	ENSMUST00000093665.1	ENSMUSG00000070175	ENSMUST00000093665			Gm24162			snRNA
e11ve16_cond1_258	chr1	20617835	20618045	+	3.3072	NA	promoter-TSS (ENSMUST00000128051.1)	protein_coding-promoter-TSS (ENSMUST00000128051.1)	100	ENSMUST00000128051.1	ENSMUSG00000043760	ENSMUST00000147480			Pkhd1			protein_coding
e11ve16_cond1_259	chr1	20618262	20618705	+	4.15398	NA	promoter-TSS (ENSMUST00000088448.11)	protein_coding-promoter-TSS (ENSMUST00000088448.11)	-419	ENSMUST00000088448.11	ENSMUSG00000043760	ENSMUST00000147480			Pkhd1			protein_coding
e11ve16_cond1_260	chr1	20996566	20998313	+	8.45846	NA	exon (ENSMUST00000037998.5, exon 11 of 11)	protein_coding-exon (ENSMUST00000037998.5, exon 11 of 11)	45751	ENSMUST00000038447.5	ENSMUSG00000041809	ENSMUST00000038447			Efhc1			protein_coding
e11ve16_cond1_261	chr1	21050980	21051516	+	6.27251	NA	intron (ENSMUST00000037998.5, intron 1 of 10)	protein_coding-intron (ENSMUST00000037998.5, intron 1 of 10)	-7592	ENSMUST00000187210.1	ENSMUSG00000041779	ENSMUST00000037998			Tram2			protein_coding
e11ve16_cond1_262	chr1	21052085	21052743	+	5.8578	NA	intron (ENSMUST00000037998.5, intron 1 of 10)	protein_coding-intron (ENSMUST00000037998.5, intron 1 of 10)	-8758	ENSMUST00000187210.1	ENSMUSG00000041779	ENSMUST00000037998			Tram2			protein_coding
e11ve16_cond1_263	chr1	21132070	21132823	+	4.29304	NA	Intergenic	Intergenic	-46542	ENSMUST00000189119.1	ENSMUSG00000100819	ENSMUST00000189119			Gm2693			unprocessed_pseudogene
e11ve16_cond1_264	chr1	21154587	21154986	+	5.33876	NA	Intergenic	Intergenic	-24202	ENSMUST00000189119.1	ENSMUSG00000100819	ENSMUST00000189119			Gm2693			unprocessed_pseudogene
e11ve16_cond1_265	chr1	21210360	21210867	+	5.00348	NA	Intergenic	Intergenic	-7962	ENSMUST00000027065.11	ENSMUSG00000025933	ENSMUST00000027065			Tmem14a			protein_coding
e11ve16_cond1_266	chr1	21283698	21283972	+	6.27594	NA	Intergenic	Intergenic	11432	ENSMUST00000178379.2	ENSMUSG00000096375	ENSMUST00000178379			Gm7094			unprocessed_pseudogene
e11ve16_cond1_267	chr1	21651054	21651424	+	3.72846	NA	intron (ENSMUST00000115299.7, intron 1 of 8)	protein_coding-intron (ENSMUST00000029667.12, intron 1 of 13)	-138183	ENSMUST00000119064.1	ENSMUSG00000082935	ENSMUST00000119064			Gm7658			processed_pseudogene
e11ve16_cond1_268	chr1	22466800	22467007	+	4.02886	NA	intron (ENSMUST00000081544.12, intron 18 of 31)	protein_coding-intron (ENSMUST00000081544.12, intron 18 of 31)	-34060	ENSMUST00000185942.1	ENSMUSG00000041670	ENSMUST00000218140			Rims1			protein_coding
e11ve16_cond1_269	chr1	22533212	22533813	+	3.82436	NA	TTS (ENSMUST00000218140.1)	protein_coding-TTS (ENSMUST00000218140.1)	-20983	ENSMUST00000239255.1	ENSMUSG00000041670	ENSMUST00000218140			Rims1			protein_coding
e11ve16_cond1_270	chr1	22533932	22534160	+	6.36205	NA	TTS (ENSMUST00000218140.1)	protein_coding-TTS (ENSMUST00000218140.1)	-21517	ENSMUST00000239255.1	ENSMUSG00000041670	ENSMUST00000218140			Rims1			protein_coding
e11ve16_cond1_271	chr1	22805368	22805975	+	4.11052	NA	promoter-TSS (ENSMUST00000081544.12)	protein_coding-promoter-TSS (ENSMUST00000081544.12)	53	ENSMUST00000097808.6	ENSMUSG00000041670	ENSMUST00000218140			Rims1			protein_coding
e11ve16_cond1_272	chr1	22934999	22935344	+	3.67337	NA	Intergenic	Intergenic	51954	ENSMUST00000190510.1	ENSMUSG00000101468	ENSMUST00000190510			Gm7761			processed_pseudogene
e11ve16_cond1_273	chr1	23891878	23892730	+	6.40075	NA	promoter-TSS (ENSMUST00000133398.1)	protein_coding-promoter-TSS (ENSMUST00000133398.1)	-310	ENSMUST00000133398.1	ENSMUSG00000026155	ENSMUST00000027339			Smap1			protein_coding
e11ve16_cond1_274	chr1	24472540	24472849	+	5.16625	NA	intron (ENSMUST00000115244.8, intron 11 of 50)	protein_coding-intron (ENSMUST00000051344.5, intron 11 of 47)	-19949	ENSMUST00000144297.1	ENSMUSG00000026141	ENSMUST00000115244			Col19a1			protein_coding
e11ve16_cond1_275	chr1	24586019	24586240	+	3.83992	NA	intron (ENSMUST00000115244.8, intron 1 of 50)	protein_coding-intron (ENSMUST00000051344.5, intron 1 of 47)	1282	ENSMUST00000051344.5	ENSMUSG00000026141	ENSMUST00000115244			Col19a1			protein_coding
e11ve16_cond1_276	chr1	24704564	24704765	+	3.87704	NA	intron (ENSMUST00000186096.6, intron 3 of 5)	protein_coding-intron (ENSMUST00000095062.9, intron 3 of 15)	-23978	ENSMUST00000187468.1	ENSMUSG00000073725	ENSMUST00000186190			Lmbrd1			protein_coding
e11ve16_cond1_277	chr1	24741675	24742616	+	4.43518	NA	intron (ENSMUST00000095062.9, intron 9 of 15)	protein_coding-intron (ENSMUST00000095062.9, intron 9 of 15)	-2728	ENSMUST00000190195.1	ENSMUSG00000073725	ENSMUST00000186190			Lmbrd1			protein_coding
e11ve16_cond1_278	chr1	25107616	25108690	+	8.50613	NA	intron (ENSMUST00000135518.7, intron 26 of 31)	protein_coding-intron (ENSMUST00000041838.6, intron 24 of 29)	-80921	ENSMUST00000185379.1	ENSMUSG00000099392	ENSMUST00000185379			Gm29414			lncRNA
e11ve16_cond1_279	chr1	25829727	25830941	+	11.688	NA	promoter-TSS (ENSMUST00000135518.7)	protein_coding-promoter-TSS (ENSMUST00000135518.7)	-323	ENSMUST00000194343.1	ENSMUSG00000104516	ENSMUST00000194343			Gm9884			TEC
e11ve16_cond1_280	chr1	28211629	28212309	+	9.38016	NA	Intergenic	Intergenic	222059	ENSMUST00000189614.1	ENSMUSG00000101372	ENSMUST00000189614			Gm19028			processed_pseudogene
e11ve16_cond1_281	chr1	28720829	28721963	+	6.03976	NA	Intergenic	Intergenic	58856	ENSMUST00000059937.4	ENSMUSG00000048411	ENSMUST00000059937			Gm597			protein_coding
e11ve16_cond1_282	chr1	29285142	29285435	+	4.30232	NA	Intergenic	Intergenic	-4213	ENSMUST00000082499.1	ENSMUSG00000064433	ENSMUST00000082499			Gm25586			misc_RNA
e11ve16_cond1_283	chr1	30464311	30464852	+	8.3731	NA	Intergenic	Intergenic	-131184	ENSMUST00000184585.1	ENSMUSG00000098883	ENSMUST00000184585			Gm27430			miRNA
e11ve16_cond1_284	chr1	30683670	30685200	+	15.3933	NA	Intergenic	Intergenic	35527	ENSMUST00000065469.2	ENSMUSG00000053185	ENSMUST00000065469			Gm9898			lncRNA
e11ve16_cond1_285	chr1	30808333	30808802	+	4.38826	NA	intron (ENSMUST00000088310.9, intron 13 of 14)	protein_coding-intron (ENSMUST00000088310.9, intron 13 of 14)	538	ENSMUST00000190190.1	ENSMUSG00000048874	ENSMUST00000191329			Phf3			protein_coding
e11ve16_cond1_286	chr1	30939485	30940167	+	7.64228	NA	TTS (ENSMUST00000027232.14)	protein_coding-TTS (ENSMUST00000027232.14)	4478	ENSMUST00000130934.1	ENSMUSG00000026064	ENSMUST00000153681			Ptp4a1			protein_coding
e11ve16_cond1_287	chr1	30940296	30940520	+	4.47854	NA	exon (ENSMUST00000027232.14, exon 6 of 6)	protein_coding-exon (ENSMUST00000027232.14, exon 6 of 6)	3896	ENSMUST00000130934.1	ENSMUSG00000026064	ENSMUST00000153681			Ptp4a1			protein_coding
e11ve16_cond1_288	chr1	31094754	31095894	+	9.59851	NA	intron (ENSMUST00000187892.7, intron 3 of 5)	protein_coding-intron (ENSMUST00000187892.7, intron 3 of 5)	1130	ENSMUST00000188605.1	ENSMUSG00000086727	ENSMUST00000187892			4931428L18Rik			protein_coding
e11ve16_cond1_289	chr1	31153863	31154133	+	9.4059	NA	intron (ENSMUST00000127775.7, intron 2 of 2)	protein_coding-intron (ENSMUST00000127775.7, intron 2 of 2)	-10551	ENSMUST00000189666.1	ENSMUSG00000099796	ENSMUST00000189666			Gm7893			processed_pseudogene
e11ve16_cond1_290	chr1	31156308	31157019	+	12.5884	NA	intron (ENSMUST00000127775.7, intron 2 of 2)	protein_coding-intron (ENSMUST00000127775.7, intron 2 of 2)	-7886	ENSMUST00000189666.1	ENSMUSG00000099796	ENSMUST00000189666			Gm7893			processed_pseudogene
e11ve16_cond1_291	chr1	31640581	31640829	+	3.53524	NA	Intergenic	Intergenic	16033	ENSMUST00000157995.1	ENSMUSG00000088620	ENSMUST00000157995			Gm23032			snRNA
e11ve16_cond1_292	chr1	32172827	32173195	+	6.213	NA	intron (ENSMUST00000027226.11, intron 1 of 8)	protein_coding-intron (ENSMUST00000027226.11, intron 1 of 8)	124	ENSMUST00000185666.1	ENSMUSG00000026058	ENSMUST00000186984			Khdrbs2			protein_coding
e11ve16_cond1_293	chr1	33499996	33500361	+	6.67343	NA	intron (ENSMUST00000027312.10, intron 10 of 13)	protein_coding-intron (ENSMUST00000027312.10, intron 10 of 13)	18077	ENSMUST00000185489.1	ENSMUSG00000101682	ENSMUST00000185489			Gm29228			processed_pseudogene
e11ve16_cond1_294	chr1	33567939	33568151	+	3.4927	NA	intron (ENSMUST00000027312.10, intron 7 of 13)	protein_coding-intron (ENSMUST00000027312.10, intron 7 of 13)	48787	ENSMUST00000192891.1	ENSMUSG00000102714	ENSMUST00000192891			Gm37618			TEC
e11ve16_cond1_295	chr1	33714595	33714890	+	3.4182	NA	Intergenic	Intergenic	-5145	ENSMUST00000140354.7	ENSMUSG00000004768	ENSMUST00000150593			Rab23			protein_coding
e11ve16_cond1_296	chr1	33766700	33767559	+	6.70591	NA	intron (ENSMUST00000139143.7, intron 11 of 12)	protein_coding-intron (ENSMUST00000019861.12, intron 13 of 14)	-9334	ENSMUST00000044691.8	ENSMUSG00000042215	ENSMUST00000187602			Bag2			protein_coding
e11ve16_cond1_297	chr1	33907016	33908582	+	9.91593	NA	promoter-TSS (ENSMUST00000062289.10)	protein_coding-promoter-TSS (ENSMUST00000062289.10)	-8	ENSMUST00000129464.7	ENSMUSG00000042182	ENSMUST00000062289			Bend6			protein_coding
e11ve16_cond1_298	chr1	34005913	34006631	+	5.503	NA	promoter-TSS (ENSMUST00000183331.7)	protein_coding-promoter-TSS (ENSMUST00000183331.7)	92	ENSMUST00000183331.7	ENSMUSG00000026131	ENSMUST00000183302			Dst			protein_coding
e11ve16_cond1_299	chr1	34060528	34061061	+	4.09483	NA	intron (ENSMUST00000097785.9, intron 1 of 97)	protein_coding-intron (ENSMUST00000097785.9, intron 1 of 97)	-16433	ENSMUST00000239001.1	ENSMUSG00000026131	ENSMUST00000183302			Dst			protein_coding
e11ve16_cond1_300	chr1	34061496	34061764	+	3.98073	NA	intron (ENSMUST00000097785.9, intron 1 of 97)	protein_coding-intron (ENSMUST00000097785.9, intron 1 of 97)	-15597	ENSMUST00000239001.1	ENSMUSG00000026131	ENSMUST00000183302			Dst			protein_coding
e11ve16_cond1_301	chr1	34104225	34104684	+	6.31304	NA	intron (ENSMUST00000182410.2, intron 1 of 3)	protein_coding-intron (ENSMUST00000182410.2, intron 1 of 3)	-12905	ENSMUST00000198033.1	ENSMUSG00000105982	ENSMUST00000198033			Mir6896			miRNA
e11ve16_cond1_302	chr1	34223591	34224605	+	6.93848	NA	intron (ENSMUST00000097785.9, intron 55 of 97)	protein_coding-intron (ENSMUST00000097785.9, intron 55 of 97)	-12498	ENSMUST00000194192.2	ENSMUSG00000026131	ENSMUST00000183302			Dst			protein_coding
e11ve16_cond1_303	chr1	34434609	34434880	+	3.38224	NA	Intergenic	Intergenic	-1480	ENSMUST00000192173.1	ENSMUSG00000102336	ENSMUST00000192173			Gm37233			lncRNA
e11ve16_cond1_304	chr1	34485743	34485972	+	4.02025	NA	promoter-TSS (ENSMUST00000186117.1)	lncRNA-promoter-TSS (ENSMUST00000186117.1)	76	ENSMUST00000186117.1	ENSMUSG00000101223	ENSMUST00000186117			4930568A12Rik			lncRNA
e11ve16_cond1_305	chr1	34486127	34486449	+	6.08459	NA	promoter-TSS (ENSMUST00000186117.1)	lncRNA-promoter-TSS (ENSMUST00000186117.1)	-355	ENSMUST00000186117.1	ENSMUSG00000101223	ENSMUST00000186117			4930568A12Rik			lncRNA
e11ve16_cond1_306	chr1	34536336	34536753	+	4.04596	NA	intron (ENSMUST00000027298.4, intron 3 of 5)	protein_coding-intron (ENSMUST00000027298.4, intron 3 of 5)	896	ENSMUST00000027298.4	ENSMUSG00000026124	ENSMUST00000027298			Cfc1			protein_coding
e11ve16_cond1_307	chr1	34537066	34537308	+	3.33267	NA	TTS (ENSMUST00000189108.1)	processed_pseudogene-TTS (ENSMUST00000189108.1)	1373	ENSMUST00000189108.1	ENSMUSG00000101803	ENSMUST00000189108			Gm28419			processed_pseudogene
e11ve16_cond1_308	chr1	34579001	34579401	+	3.6001	NA	promoter-TSS (ENSMUST00000052670.10)	protein_coding-promoter-TSS (ENSMUST00000052670.10)	412	ENSMUST00000062557.3	ENSMUSG00000045815	ENSMUST00000062557			1700101I19Rik			lncRNA
e11ve16_cond1_309	chr1	34738492	34739552	+	8.14522	NA	intron (ENSMUST00000162599.7, intron 1 of 10)	protein_coding-intron (ENSMUST00000159747.8, intron 3 of 13)	6907	ENSMUST00000162599.7	ENSMUSG00000037509	ENSMUST00000160855			Arhgef4			protein_coding
e11ve16_cond1_310	chr1	34749756	34750305	+	4.61385	NA	promoter-TSS (ENSMUST00000159021.8)	protein_coding-promoter-TSS (ENSMUST00000159021.8)	-551	ENSMUST00000159021.8	ENSMUSG00000037509	ENSMUST00000160855			Arhgef4			protein_coding
e11ve16_cond1_311	chr1	34751171	34751568	+	3.72836	NA	intron (ENSMUST00000159021.8, intron 1 of 5)	protein_coding-intron (ENSMUST00000159021.8, intron 1 of 5)	788	ENSMUST00000159021.8	ENSMUSG00000037509	ENSMUST00000160855			Arhgef4			protein_coding
e11ve16_cond1_312	chr1	34779879	34780239	+	7.77641	NA	intron (ENSMUST00000159021.8, intron 1 of 5)	protein_coding-intron (ENSMUST00000159021.8, intron 1 of 5)	-21645	ENSMUST00000047664.15	ENSMUSG00000037509	ENSMUST00000160855			Arhgef4			protein_coding
e11ve16_cond1_313	chr1	34783252	34783949	+	5.41342	NA	intron (ENSMUST00000159021.8, intron 1 of 5)	protein_coding-intron (ENSMUST00000159021.8, intron 1 of 5)	-18104	ENSMUST00000047664.15	ENSMUSG00000037509	ENSMUST00000160855			Arhgef4			protein_coding
e11ve16_cond1_314	chr1	34877562	34877798	+	5.15249	NA	promoter-TSS (ENSMUST00000191722.1)	protein_coding-promoter-TSS (ENSMUST00000191722.1)	24	ENSMUST00000191722.1	ENSMUSG00000026123	ENSMUST00000152654			Plekhb2			protein_coding
e11ve16_cond1_315	chr1	35358914	35359182	+	5.6236	NA	Intergenic	Intergenic	-179964	ENSMUST00000104043.1	ENSMUSG00000077231	ENSMUST00000104043			Gm25096			snoRNA
e11ve16_cond1_316	chr1	35391262	35391786	+	6.42023	NA	Intergenic	Intergenic	-212440	ENSMUST00000104043.1	ENSMUSG00000077231	ENSMUST00000104043			Gm25096			snoRNA
e11ve16_cond1_317	chr1	35824093	35825295	+	5.33147	NA	Intergenic	Intergenic	17720	ENSMUST00000187528.1	ENSMUSG00000101714	ENSMUST00000187528			Gm28415			lncRNA
e11ve16_cond1_318	chr1	35862766	35863078	+	6.23396	NA	Intergenic	Intergenic	-16923	ENSMUST00000194261.1	ENSMUSG00000102531	ENSMUST00000194261			1110002O04Rik			lncRNA
e11ve16_cond1_319	chr1	36065117	36065587	+	6.98847	NA	Intergenic	Intergenic	-3048	ENSMUST00000088174.3	ENSMUSG00000045216	ENSMUST00000194670			Hs6st1			protein_coding
e11ve16_cond1_320	chr1	36119310	36119650	+	4.32281	NA	Intergenic	Intergenic	-12562	ENSMUST00000193983.1	ENSMUSG00000102202	ENSMUST00000193983			Gm33280			lncRNA
e11ve16_cond1_321	chr1	36134842	36135044	+	3.74434	NA	intron (ENSMUST00000193983.1, intron 3 of 3)	lncRNA-intron (ENSMUST00000193983.1, intron 3 of 3)	2901	ENSMUST00000193983.1	ENSMUSG00000102202	ENSMUST00000193983			Gm33280			lncRNA
e11ve16_cond1_322	chr1	36269602	36269970	+	4.97358	NA	intron (ENSMUST00000056946.7, intron 1 of 3)	protein_coding-intron (ENSMUST00000056946.7, intron 1 of 3)	3649	ENSMUST00000056946.7	ENSMUSG00000047180	ENSMUST00000056946			Neurl3			protein_coding
e11ve16_cond1_323	chr1	36308411	36308757	+	6.38926	NA	exon (ENSMUST00000192874.1, exon 1 of 1)	protein_coding-exon (ENSMUST00000192874.1, exon 1 of 1)	805	ENSMUST00000140218.1	ENSMUSG00000037447	ENSMUST00000115032			Arid5a			protein_coding
e11ve16_cond1_324	chr1	36323405	36324286	+	7.45616	NA	TTS (ENSMUST00000115029.1)	protein_coding-TTS (ENSMUST00000115029.1)	6818	ENSMUST00000141121.1	ENSMUSG00000037447	ENSMUST00000115032			Arid5a			protein_coding
e11ve16_cond1_325	chr1	36471082	36471282	+	4.15902	NA	promoter-TSS (ENSMUST00000153128.1)	protein_coding-promoter-TSS (ENSMUST00000153128.1)	-438	ENSMUST00000153128.1	ENSMUSG00000037408	ENSMUST00000192530			Cnnm4			protein_coding
e11ve16_cond1_326	chr1	36471828	36472080	+	3.60183	NA	promoter-TSS (ENSMUST00000192530.1)	protein_coding-promoter-TSS (ENSMUST00000192530.1)	-42	ENSMUST00000192530.1	ENSMUSG00000037408	ENSMUST00000192530			Cnnm4			protein_coding
e11ve16_cond1_327	chr1	36511895	36512769	+	14.9464	NA	promoter-TSS (ENSMUST00000154225.1)	protein_coding-promoter-TSS (ENSMUST00000154225.1)	465	ENSMUST00000001166.13	ENSMUSG00000001138	ENSMUST00000195264			Cnnm3			protein_coding
e11ve16_cond1_328	chr1	36512921	36513157	+	5.46288	NA	promoter-TSS (ENSMUST00000154225.1)	protein_coding-promoter-TSS (ENSMUST00000154225.1)	-58	ENSMUST00000154225.1	ENSMUSG00000001138	ENSMUST00000195264			Cnnm3			protein_coding
e11ve16_cond1_329	chr1	36546271	36546563	+	6.07192	NA	exon (ENSMUST00000208269.1, exon 1 of 1)	protein_coding-exon (ENSMUST00000208269.1, exon 1 of 1)	802	ENSMUST00000208269.1	ENSMUSG00000079610	ENSMUST00000001172			Ankrd39			protein_coding
e11ve16_cond1_330	chr1	36557156	36558263	+	5.78776	NA	promoter-TSS (ENSMUST00000149224.2)	lncRNA-promoter-TSS (ENSMUST00000149224.2)	8	ENSMUST00000194426.1	ENSMUSG00000087589	ENSMUST00000149224			D430040D24Rik			lncRNA
e11ve16_cond1_331	chr1	36580235	36580445	+	3.61608	NA	intron (ENSMUST00000170295.7, intron 11 of 14)	protein_coding-intron (ENSMUST00000170295.7, intron 11 of 14)	7347	ENSMUST00000193155.5	ENSMUSG00000046337	ENSMUST00000194839			Fam178b			protein_coding
e11ve16_cond1_332	chr1	36665471	36665944	+	4.23829	NA	intron (ENSMUST00000114981.2, intron 1 of 9)	protein_coding-intron (ENSMUST00000114981.2, intron 1 of 9)	1742	ENSMUST00000104746.1	ENSMUSG00000077939	ENSMUST00000104746			Gm24133			miRNA
e11ve16_cond1_333	chr1	36785088	36785302	+	3.4097	NA	Intergenic	Intergenic	6211	ENSMUST00000190128.1	ENSMUSG00000026117	ENSMUST00000027291			Zap70			protein_coding
e11ve16_cond1_334	chr1	36785512	36785783	+	8.52415	NA	Intergenic	Intergenic	6663	ENSMUST00000190128.1	ENSMUSG00000026117	ENSMUST00000027291			Zap70			protein_coding
e11ve16_cond1_335	chr1	36870766	36872016	+	7.55809	NA	TTS (ENSMUST00000192008.1)	TEC-TTS (ENSMUST00000192008.1)	654	ENSMUST00000192008.1	ENSMUSG00000103016	ENSMUST00000192008			Gm37506			TEC
e11ve16_cond1_336	chr1	37029027	37029427	+	5.77821	NA	promoter-TSS (ENSMUST00000067178.13)	protein_coding-promoter-TSS (ENSMUST00000067178.13)	-77	ENSMUST00000124404.7	ENSMUSG00000050122	ENSMUST00000238500			Vwa3b			protein_coding
e11ve16_cond1_337	chr1	37337445	37337661	+	4.82855	NA	intron (ENSMUST00000136846.7, intron 1 of 25)	protein_coding-intron (ENSMUST00000027287.10, intron 1 of 25)	-3381	ENSMUST00000141402.1	ENSMUSG00000086064	ENSMUST00000141402			4930439A04Rik			lncRNA
e11ve16_cond1_338	chr1	37398939	37399859	+	8.1537	NA	exon (ENSMUST00000140264.7, exon 24 of 24)	protein_coding-exon (ENSMUST00000140264.7, exon 24 of 24)	21727	ENSMUST00000123124.1	ENSMUSG00000026113	ENSMUST00000027287			Inpp4a			protein_coding
e11ve16_cond1_339	chr1	37540461	37540666	+	3.3999	NA	intron (ENSMUST00000151952.7, intron 1 of 15)	protein_coding-intron (ENSMUST00000151952.7, intron 1 of 15)	453	ENSMUST00000151952.7	ENSMUSG00000026110	ENSMUST00000143636			Mgat4a			protein_coding
e11ve16_cond1_340	chr1	37694540	37694972	+	4.57744	NA	exon (ENSMUST00000192480.1, exon 1 of 1)	TEC-exon (ENSMUST00000192480.1, exon 1 of 1)	1908	ENSMUST00000192480.1	ENSMUSG00000102650	ENSMUST00000192480			Gm19863			TEC
e11ve16_cond1_341	chr1	38241591	38241996	+	4.17717	NA	intron (ENSMUST00000127620.1, intron 3 of 3)	protein_coding-intron (ENSMUST00000039827.13, intron 11 of 22)	2093	ENSMUST00000133299.1	ENSMUSG00000085391	ENSMUST00000133299			Gm16150			lncRNA
e11ve16_cond1_342	chr1	38351090	38351320	+	4.47184	NA	intron (ENSMUST00000095027.8, intron 5 of 21)	protein_coding-intron (ENSMUST00000027250.13, intron 6 of 7)	-33744	ENSMUST00000143261.7	ENSMUSG00000087131	ENSMUST00000143261			Gm16152			lncRNA
e11ve16_cond1_343	chr1	38626512	38627057	+	4.54905	NA	intron (ENSMUST00000238906.1, intron 1 of 22)	protein_coding-intron (ENSMUST00000238906.1, intron 1 of 22)	401	ENSMUST00000095027.8	ENSMUSG00000037138	ENSMUST00000039827			Aff3			protein_coding
e11ve16_cond1_344	chr1	38627202	38628275	+	5.29994	NA	promoter-TSS (ENSMUST00000095027.8)	protein_coding-promoter-TSS (ENSMUST00000095027.8)	-537	ENSMUST00000238906.1	ENSMUSG00000037138	ENSMUST00000039827			Aff3			protein_coding
e11ve16_cond1_345	chr1	38767125	38768025	+	6.90767	NA	exon (ENSMUST00000192930.1, exon 1 of 1)	TEC-exon (ENSMUST00000192930.1, exon 1 of 1)	391	ENSMUST00000192930.1	ENSMUSG00000103531	ENSMUST00000192930			2610300A13Rik			TEC
e11ve16_cond1_346	chr1	38835125	38836792	+	7.97724	NA	exon (ENSMUST00000147695.8, exon 1 of 12)	protein_coding-exon (ENSMUST00000147695.8, exon 1 of 12)	416	ENSMUST00000191724.1	ENSMUSG00000048814	ENSMUST00000039612			Lonrf2			protein_coding
e11ve16_cond1_347	chr1	38897464	38897897	+	4.04406	NA	intron (ENSMUST00000193435.5, intron 1 of 4)	protein_coding-intron (ENSMUST00000027249.11, intron 1 of 6)	306	ENSMUST00000192175.1	ENSMUSG00000026080	ENSMUST00000193441			Chst10			protein_coding
e11ve16_cond1_348	chr1	39292119	39292323	+	3.69436	NA	intron (ENSMUST00000056815.8, intron 3 of 20)	protein_coding-intron (ENSMUST00000056815.8, intron 3 of 20)	-15656	ENSMUST00000174365.1	ENSMUSG00000092553	ENSMUST00000174365			Gm20428			processed_pseudogene
e11ve16_cond1_349	chr1	39335697	39335992	+	5.52753	NA	intron (ENSMUST00000056815.8, intron 14 of 20)	protein_coding-intron (ENSMUST00000056815.8, intron 14 of 20)	-5711	ENSMUST00000172825.1	ENSMUSG00000026077	ENSMUST00000173050			Npas2			protein_coding
e11ve16_cond1_350	chr1	39339977	39340897	+	7.40793	NA	intron (ENSMUST00000056815.8, intron 16 of 20)	protein_coding-intron (ENSMUST00000056815.8, intron 16 of 20)	-1118	ENSMUST00000172825.1	ENSMUSG00000026077	ENSMUST00000173050			Npas2			protein_coding
e11ve16_cond1_351	chr1	39477814	39478097	+	4.66649	NA	intron (ENSMUST00000193823.1, intron 1 of 18)	protein_coding-intron (ENSMUST00000054462.10, intron 1 of 19)	706	ENSMUST00000192531.5	ENSMUSG00000003134	ENSMUST00000192531			Tbc1d8			protein_coding
e11ve16_cond1_352	chr1	39551972	39553179	+	7.27144	NA	promoter-TSS (ENSMUST00000146314.1)	lncRNA-promoter-TSS (ENSMUST00000146314.1)	-573	ENSMUST00000146314.1	ENSMUSG00000085894	ENSMUST00000146314			Gm15832			lncRNA
e11ve16_cond1_353	chr1	39650661	39651261	+	5.17324	NA	exon (ENSMUST00000053355.5, exon 1 of 4)	protein_coding-exon (ENSMUST00000053355.5, exon 1 of 4)	513	ENSMUST00000053355.5	ENSMUSG00000050967	ENSMUST00000053355			Creg2			protein_coding
e11ve16_cond1_354	chr1	39678587	39679745	+	9.09461	NA	intron (ENSMUST00000151913.2, intron 11 of 14)	protein_coding-intron (ENSMUST00000151913.2, intron 11 of 14)	12705	ENSMUST00000126760.1	ENSMUSG00000057173	ENSMUST00000126760			Rfx8			protein_coding
e11ve16_cond1_355	chr1	39693964	39694184	+	4.3376	NA	intron (ENSMUST00000151913.2, intron 5 of 14)	protein_coding-intron (ENSMUST00000151913.2, intron 5 of 14)	-2203	ENSMUST00000126760.1	ENSMUSG00000057173	ENSMUST00000126760			Rfx8			protein_coding
e11ve16_cond1_356	chr1	39700782	39702562	+	10.6256	NA	intron (ENSMUST00000151913.2, intron 4 of 14)	protein_coding-intron (ENSMUST00000151913.2, intron 4 of 14)	-9801	ENSMUST00000126760.1	ENSMUSG00000057173	ENSMUST00000126760			Rfx8			protein_coding
e11ve16_cond1_357	chr1	39702697	39703224	+	8.29315	NA	intron (ENSMUST00000151913.2, intron 4 of 14)	protein_coding-intron (ENSMUST00000151913.2, intron 4 of 14)	-11089	ENSMUST00000126760.1	ENSMUSG00000057173	ENSMUST00000126760			Rfx8			protein_coding
e11ve16_cond1_358	chr1	39721111	39721474	+	3.94893	NA	promoter-TSS (ENSMUST00000151913.2)	protein_coding-promoter-TSS (ENSMUST00000151913.2)	-295	ENSMUST00000151913.2	ENSMUSG00000057173	ENSMUST00000126760			Rfx8			protein_coding
e11ve16_cond1_359	chr1	39755980	39756832	+	5.34909	NA	Intergenic	Intergenic	-35409	ENSMUST00000151913.2	ENSMUSG00000057173	ENSMUST00000126760			Rfx8			protein_coding
e11ve16_cond1_360	chr1	39812472	39813343	+	14.9901	NA	Intergenic	Intergenic	-7575	ENSMUST00000171319.3	ENSMUSG00000091937	ENSMUST00000171319			Gm3646			protein_coding
e11ve16_cond1_361	chr1	39831817	39832193	+	5.72323	NA	Intergenic	Intergenic	13694	ENSMUST00000187091.6	ENSMUSG00000101634	ENSMUST00000186683			1700066B17Rik			lncRNA
e11ve16_cond1_362	chr1	39867999	39868391	+	4.14901	NA	Intergenic	Intergenic	-20861	ENSMUST00000186683.1	ENSMUSG00000101634	ENSMUST00000186683			1700066B17Rik			lncRNA
e11ve16_cond1_363	chr1	39868941	39869279	+	9.08282	NA	Intergenic	Intergenic	-21776	ENSMUST00000186683.1	ENSMUSG00000101634	ENSMUST00000186683			1700066B17Rik			lncRNA
e11ve16_cond1_364	chr1	39936127	39936574	+	4.53508	NA	intron (ENSMUST00000168431.6, intron 2 of 29)	protein_coding-intron (ENSMUST00000163854.8, intron 2 of 30)	-27805	ENSMUST00000193514.6	ENSMUSG00000026074	ENSMUST00000192355			Map4k4			protein_coding
e11ve16_cond1_365	chr1	39942629	39942882	+	5.545	NA	intron (ENSMUST00000168431.6, intron 2 of 29)	protein_coding-intron (ENSMUST00000163854.8, intron 2 of 30)	-21400	ENSMUST00000193514.6	ENSMUSG00000026074	ENSMUST00000192355			Map4k4			protein_coding
e11ve16_cond1_366	chr1	39949936	39950203	+	4.40132	NA	intron (ENSMUST00000168431.6, intron 2 of 29)	protein_coding-intron (ENSMUST00000163854.8, intron 2 of 30)	-14086	ENSMUST00000193514.6	ENSMUSG00000026074	ENSMUST00000192355			Map4k4			protein_coding
e11ve16_cond1_367	chr1	39956347	39956865	+	4.40214	NA	intron (ENSMUST00000168431.6, intron 2 of 29)	protein_coding-intron (ENSMUST00000163854.8, intron 2 of 30)	-7549	ENSMUST00000193514.6	ENSMUSG00000026074	ENSMUST00000192355			Map4k4			protein_coding
e11ve16_cond1_368	chr1	39993080	39993313	+	3.40819	NA	intron (ENSMUST00000163854.8, intron 12 of 30)	protein_coding-intron (ENSMUST00000163854.8, intron 12 of 30)	-6399	ENSMUST00000195356.1	ENSMUSG00000026074	ENSMUST00000192355			Map4k4			protein_coding
e11ve16_cond1_369	chr1	40030199	40030705	+	5.45289	NA	Intergenic	Intergenic	7242	ENSMUST00000191657.1	ENSMUSG00000026074	ENSMUST00000192355			Map4k4			protein_coding
e11ve16_cond1_370	chr1	40062926	40063966	+	14.6176	NA	Intergenic	Intergenic	-10633	ENSMUST00000191671.5	ENSMUSG00000026073	ENSMUST00000195770			Il1r2			protein_coding
e11ve16_cond1_371	chr1	40233918	40234383	+	4.4394	NA	intron (ENSMUST00000027241.10, intron 1 of 10)	protein_coding-intron (ENSMUST00000027241.10, intron 1 of 10)	-3870	ENSMUST00000191850.1	ENSMUSG00000103560	ENSMUST00000191850			Gm38070			TEC
e11ve16_cond1_372	chr1	40254332	40255123	+	7.42341	NA	intron (ENSMUST00000027241.10, intron 1 of 10)	protein_coding-intron (ENSMUST00000027241.10, intron 1 of 10)	-11859	ENSMUST00000114795.2	ENSMUSG00000026072	ENSMUST00000114795			Il1r1			protein_coding
e11ve16_cond1_373	chr1	41157975	41158514	+	5.32837	NA	Intergenic	Intergenic	23008	ENSMUST00000194002.1	ENSMUSG00000104072	ENSMUST00000194002			4930448I06Rik			lncRNA
e11ve16_cond1_374	chr1	41389704	41390040	+	4.0168	NA	Intergenic	Intergenic	139671	ENSMUST00000191087.1	ENSMUSG00000100185	ENSMUST00000191087			Gm28634			lncRNA
e11ve16_cond1_375	chr1	42490982	42491949	+	4.24194	NA	promoter-TSS (ENSMUST00000191992.1)	TEC-promoter-TSS (ENSMUST00000191992.1)	-348	ENSMUST00000191992.1	ENSMUSG00000103106	ENSMUST00000191992			Gm37047			TEC
e11ve16_cond1_376	chr1	42684244	42684788	+	5.1915	NA	intron (ENSMUST00000188153.6, intron 1 of 2)	lncRNA-intron (ENSMUST00000180689.7, intron 1 of 3)	8577	ENSMUST00000186656.6	ENSMUSG00000060424	ENSMUST00000185599			Pantr1			lncRNA
e11ve16_cond1_377	chr1	42686129	42687156	+	12.0661	NA	intron (ENSMUST00000188153.6, intron 1 of 2)	lncRNA-intron (ENSMUST00000180689.7, intron 1 of 3)	6451	ENSMUST00000186656.6	ENSMUSG00000060424	ENSMUST00000185599			Pantr1			lncRNA
e11ve16_cond1_378	chr1	42694451	42696865	+	12.5613	NA	promoter-TSS (ENSMUST00000054883.3)	protein_coding-promoter-TSS (ENSMUST00000054883.3)	-110	ENSMUST00000054883.3	ENSMUSG00000045515	ENSMUST00000054883			Pou3f3			protein_coding
e11ve16_cond1_379	chr1	42703490	42704313	+	9.86881	NA	TTS (ENSMUST00000054883.3)	protein_coding-TTS (ENSMUST00000054883.3)	4151	ENSMUST00000192894.1	ENSMUSG00000097063	ENSMUST00000180589			Pantr2			lncRNA
e11ve16_cond1_380	chr1	42713620	42713858	+	3.87501	NA	promoter-TSS (ENSMUST00000180589.1)	lncRNA-promoter-TSS (ENSMUST00000180589.1)	-285	ENSMUST00000180589.1	ENSMUSG00000097063	ENSMUST00000180589			Pantr2			lncRNA
e11ve16_cond1_381	chr1	42714149	42714779	+	5.05051	NA	intron (ENSMUST00000176807.2, intron 1 of 1)	lncRNA-intron (ENSMUST00000176807.2, intron 1 of 1)	-1010	ENSMUST00000180589.1	ENSMUSG00000097063	ENSMUST00000180589			Pantr2			lncRNA
e11ve16_cond1_382	chr1	42953149	42953625	+	5.76209	NA	intron (ENSMUST00000179766.2, intron 1 of 1)	protein_coding-intron (ENSMUST00000179655.1, intron 1 of 1)	205	ENSMUST00000187998.1	ENSMUSG00000041907	ENSMUST00000187998			Gpr45			protein_coding
e11ve16_cond1_383	chr1	43151613	43152990	+	7.01278	NA	intron (ENSMUST00000187357.1, intron 1 of 2)	protein_coding-intron (ENSMUST00000008280.13, intron 2 of 5)	11660	ENSMUST00000008280.13	ENSMUSG00000008136	ENSMUST00000185893			Fhl2			protein_coding
e11ve16_cond1_384	chr1	43163433	43163651	+	3.55523	NA	intron (ENSMUST00000185893.1, intron 1 of 5)	protein_coding-intron (ENSMUST00000008280.13, intron 1 of 5)	419	ENSMUST00000008280.13	ENSMUSG00000008136	ENSMUST00000185893			Fhl2			protein_coding
e11ve16_cond1_385	chr1	43186307	43186701	+	3.75187	NA	intron (ENSMUST00000185893.1, intron 1 of 5)	protein_coding-intron (ENSMUST00000185893.1, intron 1 of 5)	-2652	ENSMUST00000178557.1	ENSMUSG00000094497	ENSMUST00000178557			Gm8210			processed_pseudogene
e11ve16_cond1_386	chr1	43361218	43361476	+	4.18743	NA	Intergenic	Intergenic	-48237	ENSMUST00000189199.1	ENSMUSG00000101923	ENSMUST00000189199			Gm29041			processed_pseudogene
e11ve16_cond1_387	chr1	43413322	43414129	+	4.22455	NA	Intergenic	Intergenic	4141	ENSMUST00000189199.1	ENSMUSG00000101923	ENSMUST00000189199			Gm29041			processed_pseudogene
e11ve16_cond1_388	chr1	43500941	43501727	+	4.36929	NA	intron (ENSMUST00000086421.8, intron 1 of 4)	protein_coding-intron (ENSMUST00000086421.8, intron 1 of 4)	12887	ENSMUST00000194710.1	ENSMUSG00000103422	ENSMUST00000194710			Gm37536			TEC
e11ve16_cond1_389	chr1	43523433	43524512	+	10.5682	NA	intron (ENSMUST00000187435.6, intron 2 of 2)	protein_coding-intron (ENSMUST00000086421.8, intron 2 of 4)	-8433	ENSMUST00000202540.1	ENSMUSG00000066877	ENSMUST00000187435			Nck2			protein_coding
e11ve16_cond1_390	chr1	43555681	43556219	+	4.34306	NA	intron (ENSMUST00000086421.8, intron 4 of 4)	protein_coding-intron (ENSMUST00000086421.8, intron 4 of 4)	-4323	ENSMUST00000193169.1	ENSMUSG00000103945	ENSMUST00000193169			Gm38228			TEC
e11ve16_cond1_391	chr1	43882353	43882721	+	4.87818	NA	Intergenic	Intergenic	-5514	ENSMUST00000191395.1	ENSMUSG00000100701	ENSMUST00000191395			Gm19587			processed_pseudogene
e11ve16_cond1_392	chr1	43899208	43899779	+	4.24128	NA	TTS (ENSMUST00000189286.1)	processed_pseudogene-TTS (ENSMUST00000189286.1)	1199	ENSMUST00000189286.1	ENSMUSG00000101395	ENSMUST00000189286			Gm8241			processed_pseudogene
e11ve16_cond1_393	chr1	44041590	44042018	+	4.54188	NA	Intergenic	Intergenic	20132	ENSMUST00000168641.1	ENSMUSG00000091844	ENSMUST00000238662			Gm8251			protein_coding
e11ve16_cond1_394	chr1	44103038	44103255	+	7.66697	NA	promoter-TSS (ENSMUST00000027215.11)	protein_coding-promoter-TSS (ENSMUST00000027215.11)	-705	ENSMUST00000150911.7	ENSMUSG00000026049	ENSMUST00000133677			Tex30			protein_coding
e11ve16_cond1_395	chr1	44347803	44349062	+	12.5794	NA	Intergenic	Intergenic	-17396	ENSMUST00000191483.1	ENSMUSG00000100966	ENSMUST00000191483			Gm5700			processed_pseudogene
e11ve16_cond1_396	chr1	44584894	44585276	+	3.75589	NA	intron (ENSMUST00000161066.7, intron 2 of 3)	protein_coding-intron (ENSMUST00000074525.9, intron 1 of 10)	24200	ENSMUST00000194332.1	ENSMUSG00000102319	ENSMUST00000194332			Gm37626			TEC
e11ve16_cond1_397	chr1	44663761	44664668	+	8.2463	NA	intron (ENSMUST00000161066.7, intron 2 of 3)	protein_coding-intron (ENSMUST00000074525.9, intron 1 of 10)	19935	ENSMUST00000160955.1	ENSMUSG00000089877	ENSMUST00000160955			Gm16102			processed_pseudogene
e11ve16_cond1_398	chr1	44825725	44826256	+	5.33923	NA	Intergenic	Intergenic	-13181	ENSMUST00000190083.1	ENSMUSG00000100434	ENSMUST00000190083			Gm3489			processed_pseudogene
e11ve16_cond1_399	chr1	45268824	45269027	+	3.74154	NA	Intergenic	Intergenic	-42613	ENSMUST00000129611.1	ENSMUSG00000026043	ENSMUST00000190943			Col3a1			protein_coding
e11ve16_cond1_400	chr1	45315917	45316636	+	8.63031	NA	exon (ENSMUST00000189818.1, exon 2 of 2)	protein_coding-exon (ENSMUST00000189818.1, exon 2 of 2)	4603	ENSMUST00000198698.1	ENSMUSG00000105211	ENSMUST00000198698			Gm47302			miRNA
e11ve16_cond1_401	chr1	45865514	45865907	+	5.85138	NA	Intergenic	Intergenic	-7956	ENSMUST00000153604.1	ENSMUSG00000084817	ENSMUST00000153604			Gm5526			processed_pseudogene
e11ve16_cond1_402	chr1	45924971	45925559	+	4.68015	NA	promoter-TSS (ENSMUST00000186822.1)	protein_coding-promoter-TSS (ENSMUST00000186822.1)	-3	ENSMUST00000186822.1	ENSMUSG00000025993	ENSMUST00000187406			Slc40a1			protein_coding
e11ve16_cond1_403	chr1	45926417	45926747	+	10.7652	NA	promoter-TSS (ENSMUST00000027137.10)	protein_coding-promoter-TSS (ENSMUST00000027137.10)	-59	ENSMUST00000186755.1	ENSMUSG00000025993	ENSMUST00000187406			Slc40a1			protein_coding
e11ve16_cond1_404	chr1	46003532	46004203	+	8.90413	NA	Intergenic	Intergenic	8153	ENSMUST00000182781.1	ENSMUSG00000090682	ENSMUST00000182781			Gm3852			processed_pseudogene
e11ve16_cond1_405	chr1	47005325	47005773	+	4.43708	NA	Intergenic	Intergenic	-62239	ENSMUST00000186233.1	ENSMUSG00000101921	ENSMUST00000186233			Gm28825			processed_pseudogene
e11ve16_cond1_406	chr1	47472108	47472511	+	8.15793	NA	Intergenic	Intergenic	-5184	ENSMUST00000183639.1	ENSMUSG00000098876	ENSMUST00000183639			Mir6350			miRNA
e11ve16_cond1_407	chr1	50964378	50964635	+	4.10312	NA	intron (ENSMUST00000081851.3, intron 4 of 9)	protein_coding-intron (ENSMUST00000081851.3, intron 4 of 9)	36987	ENSMUST00000081851.3	ENSMUSG00000026109	ENSMUST00000186103			Tmeff2			protein_coding
e11ve16_cond1_408	chr1	50990698	50991101	+	8.24354	NA	intron (ENSMUST00000081851.3, intron 4 of 9)	protein_coding-intron (ENSMUST00000081851.3, intron 4 of 9)	-24414	ENSMUST00000175165.1	ENSMUSG00000092906	ENSMUST00000175165			Gm25736			miRNA
e11ve16_cond1_409	chr1	51057854	51058873	+	4.30415	NA	intron (ENSMUST00000081851.3, intron 4 of 9)	protein_coding-intron (ENSMUST00000081851.3, intron 4 of 9)	43050	ENSMUST00000175165.1	ENSMUSG00000092906	ENSMUST00000175165			Gm25736			miRNA
e11ve16_cond1_410	chr1	51331379	51332077	+	14.0152	NA	intron (ENSMUST00000189867.1, intron 1 of 4)	lncRNA-intron (ENSMUST00000189867.1, intron 1 of 4)	2051	ENSMUST00000189867.1	ENSMUSG00000101799	ENSMUST00000189867			9330175M20Rik			lncRNA
e11ve16_cond1_411	chr1	51566075	51567059	+	4.96392	NA	intron (ENSMUST00000189410.1, intron 3 of 3)	lncRNA-intron (ENSMUST00000189410.1, intron 3 of 3)	30151	ENSMUST00000189410.1	ENSMUSG00000099413	ENSMUST00000190169			Gm17767			lncRNA
e11ve16_cond1_412	chr1	51643658	51644410	+	5.69821	NA	Intergenic	Intergenic	-47316	ENSMUST00000189410.1	ENSMUSG00000099413	ENSMUST00000190169			Gm17767			lncRNA
e11ve16_cond1_413	chr1	51782083	51782753	+	9.11567	NA	promoter-TSS (ENSMUST00000126952.1)	protein_coding-promoter-TSS (ENSMUST00000126952.1)	-214	ENSMUST00000126952.1	ENSMUSG00000018417	ENSMUST00000140731			Myo1b			protein_coding
e11ve16_cond1_414	chr1	51856060	51856543	+	4.36678	NA	intron (ENSMUST00000018561.13, intron 3 of 30)	protein_coding-intron (ENSMUST00000018561.13, intron 3 of 30)	-5195	ENSMUST00000123299.1	ENSMUSG00000018417	ENSMUST00000140731			Myo1b			protein_coding
e11ve16_cond1_415	chr1	51856659	51856921	+	3.61628	NA	intron (ENSMUST00000018561.13, intron 3 of 30)	protein_coding-intron (ENSMUST00000018561.13, intron 3 of 30)	-5684	ENSMUST00000123299.1	ENSMUSG00000018417	ENSMUST00000140731			Myo1b			protein_coding
e11ve16_cond1_416	chr1	51870736	51871487	+	5.4292	NA	intron (ENSMUST00000126657.1, intron 3 of 3)	protein_coding-intron (ENSMUST00000018561.13, intron 2 of 30)	8497	ENSMUST00000186817.1	ENSMUSG00000100313	ENSMUST00000186817			Gm28323			lncRNA
e11ve16_cond1_417	chr1	51915173	51915684	+	4.4898	NA	intron (ENSMUST00000126657.1, intron 1 of 3)	protein_coding-intron (ENSMUST00000018561.13, intron 1 of 30)	484	ENSMUST00000151525.7	ENSMUSG00000018417	ENSMUST00000140731			Myo1b			protein_coding
e11ve16_cond1_418	chr1	51923197	51923434	+	4.04786	NA	Intergenic	Intergenic	-7244	ENSMUST00000046390.13	ENSMUSG00000018417	ENSMUST00000140731			Myo1b			protein_coding
e11ve16_cond1_419	chr1	51935172	51935373	+	3.29689	NA	Intergenic	Intergenic	3393	ENSMUST00000189886.1	ENSMUSG00000100696	ENSMUST00000189886			Gm8419			processed_pseudogene
e11ve16_cond1_420	chr1	52089168	52089652	+	3.62637	NA	intron (ENSMUST00000168302.7, intron 15 of 24)	protein_coding-intron (ENSMUST00000027277.6, intron 14 of 23)	1656	ENSMUST00000105087.1	ENSMUSG00000078291	ENSMUST00000105087			Gm3940			processed_pseudogene
e11ve16_cond1_421	chr1	52279183	52279449	+	4.00732	NA	Intergenic	Intergenic	9779	ENSMUST00000185256.1	ENSMUSG00000099648	ENSMUST00000185256			Gm5975			processed_pseudogene
e11ve16_cond1_422	chr1	52951070	52951620	+	4.93393	NA	intron (ENSMUST00000191441.1, intron 1 of 1)	protein_coding-intron (ENSMUST00000050567.10, intron 1 of 1)	1499	ENSMUST00000050567.10	ENSMUSG00000043629	ENSMUST00000114493			1700019D03Rik			protein_coding
e11ve16_cond1_423	chr1	53484980	53485265	+	4.58652	NA	intron (ENSMUST00000094964.6, intron 46 of 65)	protein_coding-intron (ENSMUST00000094964.6, intron 46 of 65)	-41727	ENSMUST00000174916.1	ENSMUSG00000092657	ENSMUST00000174916			Gm25240			miRNA
e11ve16_cond1_424	chr1	53485440	53485921	+	5.5215	NA	intron (ENSMUST00000094964.6, intron 46 of 65)	protein_coding-intron (ENSMUST00000094964.6, intron 46 of 65)	-42285	ENSMUST00000174916.1	ENSMUSG00000092657	ENSMUST00000174916			Gm25240			miRNA
e11ve16_cond1_425	chr1	54193712	54194199	+	5.95522	NA	promoter-TSS (ENSMUST00000120904.7)	protein_coding-promoter-TSS (ENSMUST00000120904.7)	93	ENSMUST00000120904.7	ENSMUSG00000042807	ENSMUST00000087659			Hecw2			protein_coding
e11ve16_cond1_426	chr1	54194704	54194986	+	4.63519	NA	promoter-TSS (ENSMUST00000120904.7)	protein_coding-promoter-TSS (ENSMUST00000120904.7)	189	ENSMUST00000097741.2	ENSMUSG00000042807	ENSMUST00000087659			Hecw2			protein_coding
e11ve16_cond1_427	chr1	54726065	54726882	+	4.82699	NA	intron (ENSMUST00000044359.15, intron 15 of 27)	protein_coding-intron (ENSMUST00000044359.15, intron 15 of 27)	-2050	ENSMUST00000179398.1	ENSMUSG00000052331	ENSMUST00000180327			Ankrd44			protein_coding
e11ve16_cond1_428	chr1	54815152	54815815	+	8.07021	NA	intron (ENSMUST00000044359.15, intron 2 of 27)	protein_coding-intron (ENSMUST00000044359.15, intron 2 of 27)	-2040	ENSMUST00000178905.1	ENSMUSG00000052331	ENSMUST00000180327			Ankrd44			protein_coding
e11ve16_cond1_429	chr1	55074837	55075514	+	8.24071	NA	Intergenic	Intergenic	8911	ENSMUST00000190239.1	ENSMUSG00000101122	ENSMUST00000190239			Gm17971			processed_pseudogene
e11ve16_cond1_430	chr1	55075794	55076011	+	11.3011	NA	Intergenic	Intergenic	9638	ENSMUST00000190239.1	ENSMUSG00000101122	ENSMUST00000190239			Gm17971			processed_pseudogene
e11ve16_cond1_431	chr1	55404590	55405597	+	6.28525	NA	promoter-TSS (ENSMUST00000042986.9)	protein_coding-promoter-TSS (ENSMUST00000042986.9)	-828	ENSMUST00000042986.9	ENSMUSG00000038349	ENSMUST00000187059			Plcl1			protein_coding
e11ve16_cond1_432	chr1	55406318	55406632	+	4.36168	NA	exon (ENSMUST00000042986.9, exon 1 of 6)	protein_coding-exon (ENSMUST00000042986.9, exon 1 of 6)	554	ENSMUST00000042986.9	ENSMUSG00000038349	ENSMUST00000187059			Plcl1			protein_coding
e11ve16_cond1_433	chr1	55436174	55437576	+	8.07851	NA	intron (ENSMUST00000042986.9, intron 1 of 5)	protein_coding-intron (ENSMUST00000042986.9, intron 1 of 5)	-4029	ENSMUST00000193928.1	ENSMUSG00000102145	ENSMUST00000193928			Gm38056			TEC
e11ve16_cond1_434	chr1	55445331	55446181	+	5.50768	NA	promoter-TSS (ENSMUST00000186507.1)	processed_pseudogene-promoter-TSS (ENSMUST00000186507.1)	-732	ENSMUST00000186507.1	ENSMUSG00000100309	ENSMUST00000186507			Gm6644			processed_pseudogene
e11ve16_cond1_435	chr1	55500768	55501108	+	3.65519	NA	intron (ENSMUST00000042986.9, intron 1 of 5)	protein_coding-intron (ENSMUST00000042986.9, intron 1 of 5)	-55914	ENSMUST00000186507.1	ENSMUSG00000100309	ENSMUST00000186507			Gm6644			processed_pseudogene
e11ve16_cond1_436	chr1	55552008	55552609	+	7.74322	NA	intron (ENSMUST00000042986.9, intron 1 of 5)	protein_coding-intron (ENSMUST00000042986.9, intron 1 of 5)	-7152	ENSMUST00000193032.1	ENSMUSG00000102831	ENSMUST00000193032			Gm37382			TEC
e11ve16_cond1_437	chr1	55605182	55605926	+	12.1229	NA	intron (ENSMUST00000042986.9, intron 1 of 5)	protein_coding-intron (ENSMUST00000042986.9, intron 1 of 5)	46094	ENSMUST00000193032.1	ENSMUSG00000102831	ENSMUST00000193032			Gm37382			TEC
e11ve16_cond1_438	chr1	56359975	56360526	+	4.91421	NA	Intergenic	Intergenic	-91157	ENSMUST00000185232.1	ENSMUSG00000100944	ENSMUST00000185232			Gm28900			processed_pseudogene
e11ve16_cond1_439	chr1	56886418	56886854	+	5.19851	NA	intron (ENSMUST00000177424.1, intron 2 of 6)	protein_coding-intron (ENSMUST00000042857.13, intron 5 of 9)	83204	ENSMUST00000176759.1	ENSMUSG00000038331	ENSMUST00000176759			Satb2			protein_coding
e11ve16_cond1_440	chr1	57077642	57078640	+	3.91179	NA	Intergenic	Intergenic	37748	ENSMUST00000187858.1	ENSMUSG00000087022	ENSMUST00000185204			9130024F11Rik			lncRNA
e11ve16_cond1_441	chr1	57331166	57332218	+	8.83656	NA	Intergenic	Intergenic	-39291	ENSMUST00000188353.1	ENSMUSG00000101129	ENSMUST00000188353			Gm5254			processed_pseudogene
e11ve16_cond1_442	chr1	57528817	57529055	+	5.79233	NA	Intergenic	Intergenic	-5294	ENSMUST00000194005.1	ENSMUSG00000102685	ENSMUST00000194005			Gm37373			TEC
e11ve16_cond1_443	chr1	57544007	57544456	+	4.5789	NA	Intergenic	Intergenic	19820	ENSMUST00000186851.1	ENSMUSG00000101151	ENSMUST00000186851			Gm17929			processed_pseudogene
e11ve16_cond1_444	chr1	57847091	57847683	+	5.14887	NA	intron (ENSMUST00000169772.2, intron 1 of 11)	protein_coding-intron (ENSMUST00000163239.7, intron 2 of 11)	1816	ENSMUST00000169772.2	ENSMUSG00000038305	ENSMUST00000168016			Spats2l			protein_coding
e11ve16_cond1_445	chr1	57941683	57942325	+	7.96784	NA	intron (ENSMUST00000167085.7, intron 12 of 13)	protein_coding-intron (ENSMUST00000163239.7, intron 10 of 11)	20098	ENSMUST00000163006.1	ENSMUSG00000054770	ENSMUST00000162410			Kctd18			protein_coding
e11ve16_cond1_446	chr1	58951092	58951381	+	3.42699	NA	intron (ENSMUST00000173719.1, intron 1 of 1)	protein_coding-intron (ENSMUST00000027186.11, intron 1 of 15)	-4899	ENSMUST00000174120.1	ENSMUSG00000026028	ENSMUST00000172685			Trak2			protein_coding
e11ve16_cond1_447	chr1	59174625	59175097	+	9.30491	NA	intron (ENSMUST00000027178.12, intron 26 of 33)	protein_coding-intron (ENSMUST00000027178.12, intron 26 of 33)	-11472	ENSMUST00000114275.8	ENSMUSG00000079550	ENSMUST00000191200			Mpp4			protein_coding
e11ve16_cond1_448	chr1	59237021	59237883	+	3.94751	NA	promoter-TSS (ENSMUST00000027178.12)	protein_coding-promoter-TSS (ENSMUST00000027178.12)	-221	ENSMUST00000159166.7	ENSMUSG00000026024	ENSMUST00000163058			Als2			protein_coding
e11ve16_cond1_449	chr1	59341305	59341617	+	6.03381	NA	intron (ENSMUST00000160662.7, intron 12 of 13)	protein_coding-intron (ENSMUST00000114248.2, intron 12 of 13)	-37469	ENSMUST00000187523.1	ENSMUSG00000099922	ENSMUST00000187523			Gm29016			lncRNA
e11ve16_cond1_450	chr1	59367870	59368399	+	5.93309	NA	Intergenic	Intergenic	-10796	ENSMUST00000187523.1	ENSMUSG00000099922	ENSMUST00000187523			Gm29016			lncRNA
e11ve16_cond1_451	chr1	59482804	59484118	+	8.5657	NA	exon (ENSMUST00000114246.3, exon 1 of 1)	protein_coding-exon (ENSMUST00000114246.3, exon 1 of 1)	1037	ENSMUST00000114246.3	ENSMUSG00000041075	ENSMUST00000114246			Fzd7			protein_coding
e11ve16_cond1_452	chr1	59579219	59579541	+	4.87071	NA	intron (ENSMUST00000114243.7, intron 11 of 19)	protein_coding-intron (ENSMUST00000114243.7, intron 11 of 19)	-3016	ENSMUST00000212835.1	ENSMUSG00000047361	ENSMUST00000187979			Gm973			protein_coding
e11ve16_cond1_453	chr1	59669994	59670621	+	4.24144	NA	intron (ENSMUST00000091374.8, intron 1 of 4)	protein_coding-intron (ENSMUST00000091374.8, intron 1 of 4)	432	ENSMUST00000185265.1	ENSMUSG00000026021	ENSMUST00000191158			Sumo1			protein_coding
e11ve16_cond1_454	chr1	59720083	59720419	+	4.29776	NA	Intergenic	Intergenic	15461	ENSMUST00000158468.3	ENSMUSG00000089093	ENSMUST00000158468			Snord11			snoRNA
e11ve16_cond1_455	chr1	60042455	60042792	+	3.55357	NA	intron (ENSMUST00000191251.6, intron 1 of 10)	protein_coding-intron (ENSMUST00000027172.12, intron 1 of 10)	464	ENSMUST00000027172.12	ENSMUSG00000026018	ENSMUST00000186970			Ica1l			protein_coding
e11ve16_cond1_456	chr1	60409012	60409396	+	5.74794	NA	promoter-TSS (ENSMUST00000052332.14)	protein_coding-promoter-TSS (ENSMUST00000052332.14)	-415	ENSMUST00000052332.14	ENSMUSG00000026782	ENSMUST00000185788			Abi2			protein_coding
e11ve16_cond1_457	chr1	61113087	61113298	+	3.36523	NA	Intergenic	Intergenic	10812	ENSMUST00000118999.1	ENSMUSG00000082661	ENSMUST00000118999			Gm11590			processed_pseudogene
e11ve16_cond1_458	chr1	61135747	61137003	+	6.71477	NA	Intergenic	Intergenic	-12371	ENSMUST00000118999.1	ENSMUSG00000082661	ENSMUST00000118999			Gm11590			processed_pseudogene
e11ve16_cond1_459	chr1	61203526	61203906	+	4.65664	NA	Intergenic	Intergenic	-6474	ENSMUST00000120063.1	ENSMUSG00000080785	ENSMUST00000120063			Gm11591			processed_pseudogene
e11ve16_cond1_460	chr1	61925381	61925722	+	5.39778	NA	intron (ENSMUST00000046673.10, intron 2 of 21)	protein_coding-intron (ENSMUST00000046673.10, intron 2 of 21)	55656	ENSMUST00000187972.1	ENSMUSG00000100344	ENSMUST00000187972			Gm29640			processed_pseudogene
e11ve16_cond1_461	chr1	62142135	62142845	+	5.3518	NA	intron (ENSMUST00000075374.9, intron 4 of 22)	protein_coding-intron (ENSMUST00000046673.10, intron 4 of 21)	-6381	ENSMUST00000127498.2	ENSMUSG00000085019	ENSMUST00000127498			Pard3bos2			lncRNA
e11ve16_cond1_462	chr1	62181746	62182094	+	3.57319	NA	intron (ENSMUST00000046673.10, intron 10 of 21)	protein_coding-intron (ENSMUST00000046673.10, intron 10 of 21)	-45811	ENSMUST00000127498.2	ENSMUSG00000085019	ENSMUST00000127498			Pard3bos2			lncRNA
e11ve16_cond1_463	chr1	62315835	62316129	+	5.63189	NA	intron (ENSMUST00000075374.9, intron 16 of 22)	protein_coding-intron (ENSMUST00000046673.10, intron 15 of 21)	68829	ENSMUST00000195466.1	ENSMUSG00000102359	ENSMUST00000195466			Gm38351			TEC
e11ve16_cond1_464	chr1	62316235	62316480	+	4.06664	NA	intron (ENSMUST00000075374.9, intron 16 of 22)	protein_coding-intron (ENSMUST00000046673.10, intron 15 of 21)	69204	ENSMUST00000195466.1	ENSMUSG00000102359	ENSMUST00000195466			Gm38351			TEC
e11ve16_cond1_465	chr1	62405538	62406702	+	18.2184	NA	intron (ENSMUST00000094906.3, intron 18 of 21)	protein_coding-intron (ENSMUST00000046673.10, intron 17 of 21)	93141	ENSMUST00000147177.1	ENSMUSG00000085400	ENSMUST00000147177			Pard3bos3			lncRNA
e11ve16_cond1_466	chr1	62429837	62430063	+	5.2239	NA	intron (ENSMUST00000094906.3, intron 18 of 21)	protein_coding-intron (ENSMUST00000046673.10, intron 17 of 21)	69311	ENSMUST00000147177.1	ENSMUSG00000085400	ENSMUST00000147177			Pard3bos3			lncRNA
e11ve16_cond1_467	chr1	62631589	62632385	+	5.20628	NA	intron (ENSMUST00000094906.3, intron 21 of 21)	protein_coding-intron (ENSMUST00000046673.10, intron 21 of 21)	25801	ENSMUST00000119592.1	ENSMUSG00000081950	ENSMUST00000119592			Gm11600			processed_pseudogene
e11ve16_cond1_468	chr1	62632525	62632771	+	3.29179	NA	intron (ENSMUST00000094906.3, intron 21 of 21)	protein_coding-intron (ENSMUST00000046673.10, intron 21 of 21)	25140	ENSMUST00000119592.1	ENSMUSG00000081950	ENSMUST00000119592			Gm11600			processed_pseudogene
e11ve16_cond1_469	chr1	62647849	62648830	+	7.71907	NA	Intergenic	Intergenic	9449	ENSMUST00000119592.1	ENSMUSG00000081950	ENSMUST00000119592			Gm11600			processed_pseudogene
e11ve16_cond1_470	chr1	62707359	62707703	+	3.44399	NA	intron (ENSMUST00000126344.1, intron 1 of 2)	protein_coding-intron (ENSMUST00000027112.12, intron 1 of 15)	3829	ENSMUST00000063594.12	ENSMUSG00000025969	ENSMUST00000126344			Nrp2			protein_coding
e11ve16_cond1_471	chr1	62777239	62777867	+	5.35075	NA	intron (ENSMUST00000075144.11, intron 12 of 15)	protein_coding-intron (ENSMUST00000027112.12, intron 12 of 15)	-31749	ENSMUST00000192219.1	ENSMUSG00000103032	ENSMUST00000192219			Gm37121			TEC
e11ve16_cond1_472	chr1	62813878	62814140	+	3.89031	NA	intron (ENSMUST00000114157.2, intron 16 of 16)	protein_coding-intron (ENSMUST00000063594.12, intron 16 of 16)	4707	ENSMUST00000192219.1	ENSMUSG00000103032	ENSMUST00000192219			Gm37121			TEC
e11ve16_cond1_473	chr1	62814366	62814612	+	6.17865	NA	intron (ENSMUST00000114157.2, intron 16 of 16)	protein_coding-intron (ENSMUST00000063594.12, intron 16 of 16)	5187	ENSMUST00000192219.1	ENSMUSG00000103032	ENSMUST00000192219			Gm37121			TEC
e11ve16_cond1_474	chr1	62827514	62828262	+	4.86633	NA	intron (ENSMUST00000189802.1, intron 1 of 1)	lncRNA-intron (ENSMUST00000189802.1, intron 1 of 1)	4482	ENSMUST00000189802.1	ENSMUSG00000100426	ENSMUST00000189802			Gm4208			lncRNA
e11ve16_cond1_475	chr1	62942775	62943254	+	9.7455	NA	Intergenic	Intergenic	-82728	ENSMUST00000199516.1	ENSMUSG00000104991	ENSMUST00000199516			Gm44468			miRNA
e11ve16_cond1_476	chr1	62986584	62987063	+	5.13727	NA	intron (ENSMUST00000133236.7, intron 9 of 12)	protein_coding-intron (ENSMUST00000133236.7, intron 9 of 12)	-38919	ENSMUST00000199516.1	ENSMUSG00000104991	ENSMUST00000199516			Gm44468			miRNA
e11ve16_cond1_477	chr1	63005197	63005628	+	3.74711	NA	intron (ENSMUST00000133236.7, intron 9 of 12)	protein_coding-intron (ENSMUST00000133236.7, intron 9 of 12)	-20330	ENSMUST00000199516.1	ENSMUSG00000104991	ENSMUST00000199516			Gm44468			miRNA
e11ve16_cond1_478	chr1	63180861	63181118	+	6.87618	NA	TTS (ENSMUST00000129339.7)	protein_coding-TTS (ENSMUST00000129339.7)	1985	ENSMUST00000082668.1	ENSMUSG00000064602	ENSMUST00000082668			Snora41			snoRNA
e11ve16_cond1_479	chr1	63203649	63205015	+	11.6929	NA	intron (ENSMUST00000189722.1, intron 1 of 1)	protein_coding-intron (ENSMUST00000050536.13, intron 2 of 2)	3624	ENSMUST00000189722.1	ENSMUSG00000086730	ENSMUST00000189722			Platr12			lncRNA
e11ve16_cond1_480	chr1	63237600	63238029	+	16.1549	NA	Intergenic	Intergenic	10685	ENSMUST00000194370.1	ENSMUSG00000102536	ENSMUST00000194370			1700039I01Rik			TEC
e11ve16_cond1_481	chr1	63247018	63248159	+	11.6883	NA	TTS (ENSMUST00000194370.1)	TEC-TTS (ENSMUST00000194370.1)	911	ENSMUST00000194370.1	ENSMUSG00000102536	ENSMUST00000194370			1700039I01Rik			TEC
e11ve16_cond1_482	chr1	63445503	63445788	+	4.82216	NA	promoter-TSS (ENSMUST00000087374.9)	protein_coding-promoter-TSS (ENSMUST00000087374.9)	-246	ENSMUST00000182642.7	ENSMUSG00000025964	ENSMUST00000146403			Adam23			protein_coding
e11ve16_cond1_483	chr1	63585071	63585480	+	5.50577	NA	exon (ENSMUST00000141545.2, exon 1 of 2)	protein_coding-exon (ENSMUST00000141545.2, exon 1 of 2)	252	ENSMUST00000141545.2	ENSMUSG00000025964	ENSMUST00000146403			Adam23			protein_coding
e11ve16_cond1_484	chr1	63828608	63828841	+	4.82631	NA	Intergenic	Intergenic	16854	ENSMUST00000120280.1	ENSMUSG00000080817	ENSMUST00000120280			Gm13751			processed_pseudogene
e11ve16_cond1_485	chr1	63977117	63977369	+	4.8916	NA	Intergenic	Intergenic	12516	ENSMUST00000133244.1	ENSMUSG00000044689	ENSMUST00000133244			Gm13749			lncRNA
e11ve16_cond1_486	chr1	63980664	63980900	+	4.59863	NA	Intergenic	Intergenic	16055	ENSMUST00000133244.1	ENSMUSG00000044689	ENSMUST00000133244			Gm13749			lncRNA
e11ve16_cond1_487	chr1	63981355	63981575	+	5.42389	NA	Intergenic	Intergenic	16738	ENSMUST00000133244.1	ENSMUSG00000044689	ENSMUST00000133244			Gm13749			lncRNA
e11ve16_cond1_488	chr1	63993943	63995063	+	6.10796	NA	Intergenic	Intergenic	29776	ENSMUST00000133244.1	ENSMUSG00000044689	ENSMUST00000133244			Gm13749			lncRNA
e11ve16_cond1_489	chr1	64028806	64029054	+	6.4294	NA	TTS (ENSMUST00000114086.7)	protein_coding-TTS (ENSMUST00000114086.7)	13571	ENSMUST00000184798.1	ENSMUSG00000098487	ENSMUST00000184798			Mir6899			miRNA
e11ve16_cond1_490	chr1	64087979	64089183	+	7.82841	NA	intron (ENSMUST00000149820.1, intron 3 of 3)	protein_coding-intron (ENSMUST00000055001.9, intron 2 of 3)	9927	ENSMUST00000149820.1	ENSMUSG00000086836	ENSMUST00000149820			Gm13748			lncRNA
e11ve16_cond1_491	chr1	64097893	64098160	+	13.7144	NA	intron (ENSMUST00000114086.7, intron 1 of 3)	protein_coding-intron (ENSMUST00000055001.9, intron 2 of 3)	19372	ENSMUST00000149820.1	ENSMUSG00000086836	ENSMUST00000149820			Gm13748			lncRNA
e11ve16_cond1_492	chr1	64105448	64106727	+	3.83787	NA	intron (ENSMUST00000114086.7, intron 1 of 3)	protein_coding-intron (ENSMUST00000055001.9, intron 2 of 3)	15395	ENSMUST00000055001.9	ENSMUSG00000025959	ENSMUST00000135075			Klf7			protein_coding
e11ve16_cond1_493	chr1	64203038	64203256	+	3.96386	NA	intron (ENSMUST00000190863.1, intron 1 of 1)	lncRNA-intron (ENSMUST00000190863.1, intron 1 of 1)	52946	ENSMUST00000117621.1	ENSMUSG00000086721	ENSMUST00000117621			Gm13750			processed_pseudogene
e11ve16_cond1_494	chr1	64533242	64533540	+	16.9052	NA	intron (ENSMUST00000171164.7, intron 1 of 6)	protein_coding-intron (ENSMUST00000049932.11, intron 1 of 8)	497	ENSMUST00000190348.1	ENSMUSG00000025958	ENSMUST00000190876			Creb1			protein_coding
e11ve16_cond1_495	chr1	64690877	64691358	+	15.9628	NA	promoter-TSS (ENSMUST00000094898.4)	protein_coding-promoter-TSS (ENSMUST00000094898.4)	-66	ENSMUST00000187638.6	ENSMUSG00000070871	ENSMUST00000114077			Ccnyl1			protein_coding
e11ve16_cond1_496	chr1	64799087	64799647	+	4.40406	NA	intron (ENSMUST00000187188.1, intron 2 of 2)	protein_coding-intron (ENSMUST00000097713.1, intron 7 of 7)	37397	ENSMUST00000187188.1	ENSMUSG00000051344	ENSMUST00000140857			Plekhm3			protein_coding
e11ve16_cond1_497	chr1	64829171	64829940	+	9.57787	NA	intron (ENSMUST00000139649.7, intron 6 of 8)	protein_coding-intron (ENSMUST00000097713.1, intron 6 of 7)	7209	ENSMUST00000187188.1	ENSMUSG00000051344	ENSMUST00000140857			Plekhm3			protein_coding
e11ve16_cond1_498	chr1	64849161	64849547	+	3.51553	NA	intron (ENSMUST00000139649.7, intron 6 of 8)	protein_coding-intron (ENSMUST00000097713.1, intron 6 of 7)	-12590	ENSMUST00000187188.1	ENSMUSG00000051344	ENSMUST00000140857			Plekhm3			protein_coding
e11ve16_cond1_499	chr1	64853957	64854573	+	4.97871	NA	intron (ENSMUST00000139649.7, intron 6 of 8)	protein_coding-intron (ENSMUST00000097713.1, intron 6 of 7)	-17501	ENSMUST00000187188.1	ENSMUSG00000051344	ENSMUST00000140857			Plekhm3			protein_coding
e11ve16_cond1_500	chr1	64917508	64917904	+	3.40567	NA	intron (ENSMUST00000140857.1, intron 2 of 4)	protein_coding-intron (ENSMUST00000097713.1, intron 3 of 7)	10391	ENSMUST00000140857.1	ENSMUSG00000051344	ENSMUST00000140857			Plekhm3			protein_coding
e11ve16_cond1_501	chr1	65164114	65164513	+	4.03011	NA	intron (ENSMUST00000097709.10, intron 6 of 8)	protein_coding-intron (ENSMUST00000097709.10, intron 6 of 8)	11251	ENSMUST00000149310.7	ENSMUSG00000025950	ENSMUST00000149310			Idh1			protein_coding
e11ve16_cond1_502	chr1	65311720	65311957	+	3.25244	NA	intron (ENSMUST00000027083.6, intron 1 of 12)	protein_coding-intron (ENSMUST00000027083.6, intron 1 of 12)	581	ENSMUST00000027083.6	ENSMUSG00000025946	ENSMUST00000027083			Pth2r			protein_coding
e11ve16_cond1_503	chr1	65312805	65313095	+	5.39153	NA	intron (ENSMUST00000027083.6, intron 1 of 12)	protein_coding-intron (ENSMUST00000027083.6, intron 1 of 12)	1693	ENSMUST00000027083.6	ENSMUSG00000025946	ENSMUST00000027083			Pth2r			protein_coding
e11ve16_cond1_504	chr1	65352607	65353661	+	13.5563	NA	intron (ENSMUST00000027083.6, intron 8 of 12)	protein_coding-intron (ENSMUST00000027083.6, intron 8 of 12)	41877	ENSMUST00000027083.6	ENSMUSG00000025946	ENSMUST00000027083			Pth2r			protein_coding
e11ve16_cond1_505	chr1	65383973	65384206	+	4.94585	NA	intron (ENSMUST00000027083.6, intron 11 of 12)	protein_coding-intron (ENSMUST00000027083.6, intron 11 of 12)	37032	ENSMUST00000191528.1	ENSMUSG00000100503	ENSMUST00000191528			Gm28927			unprocessed_pseudogene
e11ve16_cond1_506	chr1	65387800	65388395	+	4.16566	NA	intron (ENSMUST00000027083.6, intron 12 of 12)	protein_coding-intron (ENSMUST00000027083.6, intron 12 of 12)	33024	ENSMUST00000191528.1	ENSMUSG00000100503	ENSMUST00000191528			Gm28927			unprocessed_pseudogene
e11ve16_cond1_507	chr1	65535269	65535892	+	4.85109	NA	Intergenic	Intergenic	-11505	ENSMUST00000189087.1	ENSMUSG00000099819	ENSMUST00000189087			Gm28728			processed_pseudogene
e11ve16_cond1_508	chr1	67020280	67021215	+	7.25724	NA	exon (ENSMUST00000189210.1, exon 1 of 1)	protein_coding-exon (ENSMUST00000189210.1, exon 1 of 1)	318	ENSMUST00000133508.1	ENSMUSG00000026000	ENSMUST00000149996			Lancl1			protein_coding
e11ve16_cond1_509	chr1	67077331	67078173	+	4.5057	NA	Intergenic	Intergenic	-38880	ENSMUST00000113979.9	ENSMUSG00000026000	ENSMUST00000149996			Lancl1			protein_coding
e11ve16_cond1_510	chr1	67268102	67268623	+	7.32763	NA	intron (ENSMUST00000140506.1, intron 3 of 4)	lncRNA-intron (ENSMUST00000140506.1, intron 3 of 4)	11138	ENSMUST00000104557.1	ENSMUSG00000077745	ENSMUST00000104557			Gm26342			snoRNA
e11ve16_cond1_511	chr1	68501736	68501939	+	6.67851	NA	intron (ENSMUST00000119142.7, intron 3 of 27)	protein_coding-intron (ENSMUST00000119142.7, intron 3 of 27)	91849	ENSMUST00000195836.1	ENSMUSG00000103307	ENSMUST00000195836			Gm19335			TEC
e11ve16_cond1_512	chr1	68957026	68957387	+	3.63471	NA	intron (ENSMUST00000153432.1, intron 1 of 18)	protein_coding-intron (ENSMUST00000119142.7, intron 1 of 27)	149534	ENSMUST00000140116.1	ENSMUSG00000087514	ENSMUST00000140116			Gm16076			lncRNA
e11ve16_cond1_513	chr1	69209938	69210529	+	4.8597	NA	Intergenic	Intergenic	-78934	ENSMUST00000122454.1	ENSMUSG00000084332	ENSMUST00000122454			Gm8840			processed_pseudogene
e11ve16_cond1_514	chr1	69285363	69285629	+	8.22207	NA	Intergenic	Intergenic	-91825	ENSMUST00000187740.1	ENSMUSG00000101387	ENSMUST00000187740			Pced1c-ps			processed_pseudogene
e11ve16_cond1_515	chr1	69286122	69286508	+	6.57355	NA	Intergenic	Intergenic	-91006	ENSMUST00000187740.1	ENSMUSG00000101387	ENSMUST00000187740			Pced1c-ps			processed_pseudogene
e11ve16_cond1_516	chr1	69368218	69368587	+	4.65463	NA	Intergenic	Intergenic	-8919	ENSMUST00000187740.1	ENSMUSG00000101387	ENSMUST00000187740			Pced1c-ps			processed_pseudogene
e11ve16_cond1_517	chr1	69433792	69434025	+	5.31396	NA	Intergenic	Intergenic	-7148	ENSMUST00000189646.1	ENSMUSG00000099804	ENSMUST00000189646			Gm28497			lncRNA
e11ve16_cond1_518	chr1	69466630	69467446	+	8.84895	NA	Intergenic	Intergenic	25982	ENSMUST00000189646.1	ENSMUSG00000099804	ENSMUST00000189646			Gm28497			lncRNA
e11ve16_cond1_519	chr1	69513868	69514119	+	4.16553	NA	promoter-TSS (ENSMUST00000187100.1)	lncRNA-promoter-TSS (ENSMUST00000187100.1)	61	ENSMUST00000187100.1	ENSMUSG00000101156	ENSMUST00000187100			Gm29114			lncRNA
e11ve16_cond1_520	chr1	69656243	69656642	+	4.45746	NA	intron (ENSMUST00000027146.8, intron 3 of 7)	protein_coding-intron (ENSMUST00000027146.8, intron 3 of 7)	5619	ENSMUST00000190898.1	ENSMUSG00000099954	ENSMUST00000190898			Gm28112			lncRNA
e11ve16_cond1_521	chr1	69657563	69658056	+	11.0374	NA	intron (ENSMUST00000027146.8, intron 3 of 7)	protein_coding-intron (ENSMUST00000027146.8, intron 3 of 7)	4252	ENSMUST00000190898.1	ENSMUSG00000099954	ENSMUST00000190898			Gm28112			lncRNA
e11ve16_cond1_522	chr1	69787044	69787290	+	4.86712	NA	Intergenic	Intergenic	16299	ENSMUST00000194308.1	ENSMUSG00000103402	ENSMUST00000194308			Gm37930			TEC
e11ve16_cond1_523	chr1	70754560	70756090	+	4.11944	NA	intron (ENSMUST00000162182.1, intron 5 of 5)	protein_coding-intron (ENSMUST00000053922.11, intron 3 of 3)	29402	ENSMUST00000162182.1	ENSMUSG00000045648	ENSMUST00000162182			Vwc2l			protein_coding
e11ve16_cond1_524	chr1	71653871	71654144	+	5.96076	NA	promoter-TSS (ENSMUST00000055226.12)	protein_coding-promoter-TSS (ENSMUST00000055226.12)	668	ENSMUST00000125934.1	ENSMUSG00000073652	ENSMUST00000126516			Apol7d			lncRNA
e11ve16_cond1_525	chr1	71723239	71724178	+	5.98326	NA	Intergenic	Intergenic	-8784	ENSMUST00000191412.1	ENSMUSG00000100319	ENSMUST00000191412			Gm5256			processed_pseudogene
e11ve16_cond1_526	chr1	71764625	71765343	+	4.21605	NA	Intergenic	Intergenic	-50060	ENSMUST00000191412.1	ENSMUSG00000100319	ENSMUST00000191412			Gm5256			processed_pseudogene
e11ve16_cond1_527	chr1	71886354	71887374	+	6.8514	NA	Intergenic	Intergenic	-1248	ENSMUST00000189680.6	ENSMUSG00000099707	ENSMUST00000189680			Gm8883			lncRNA
e11ve16_cond1_528	chr1	71900616	71900873	+	3.59997	NA	intron (ENSMUST00000187553.1, intron 1 of 1)	lncRNA-intron (ENSMUST00000187553.1, intron 1 of 1)	-1809	ENSMUST00000189983.1	ENSMUSG00000101211	ENSMUST00000189983			Gm28818			lncRNA
e11ve16_cond1_529	chr1	71936279	71938081	+	10.9605	NA	Intergenic	Intergenic	-20055	ENSMUST00000187553.1	ENSMUSG00000101211	ENSMUST00000189983			Gm28818			lncRNA
e11ve16_cond1_530	chr1	72099359	72099898	+	5.73386	NA	Intergenic	Intergenic	11771	ENSMUST00000189382.1	ENSMUSG00000101496	ENSMUST00000189382			Gm8885			processed_pseudogene
e11ve16_cond1_531	chr1	72173483	72174417	+	9.50793	NA	intron (ENSMUST00000048860.8, intron 2 of 4)	protein_coding-intron (ENSMUST00000048860.8, intron 2 of 4)	38357	ENSMUST00000048860.8	ENSMUSG00000039395	ENSMUST00000048860			Mreg			protein_coding
e11ve16_cond1_532	chr1	72218836	72219481	+	5.94082	NA	Intergenic	Intergenic	-6851	ENSMUST00000048860.8	ENSMUSG00000039395	ENSMUST00000048860			Mreg			protein_coding
e11ve16_cond1_533	chr1	72219695	72220140	+	7.23895	NA	Intergenic	Intergenic	-6323	ENSMUST00000178786.1	ENSMUSG00000094655	ENSMUST00000178786			Gm25360			snRNA
e11ve16_cond1_534	chr1	72255363	72255712	+	3.74327	NA	TTS (ENSMUST00000179876.1)	snRNA-TTS (ENSMUST00000179876.1)	529	ENSMUST00000179876.1	ENSMUSG00000093843	ENSMUST00000179876			Gm25939			snRNA
e11ve16_cond1_535	chr1	72316365	72317148	+	5.13898	NA	intron (ENSMUST00000027379.9, intron 5 of 20)	protein_coding-intron (ENSMUST00000027379.9, intron 5 of 20)	9329	ENSMUST00000027379.9	ENSMUSG00000026187	ENSMUST00000027379			Xrcc5			protein_coding
e11ve16_cond1_536	chr1	72400280	72400787	+	3.5844	NA	Intergenic	Intergenic	-58966	ENSMUST00000146593.1	ENSMUSG00000085812	ENSMUST00000146593			Gm15843			processed_pseudogene
e11ve16_cond1_537	chr1	72716717	72717106	+	7.58114	NA	Intergenic	Intergenic	5130	ENSMUST00000211963.1	ENSMUSG00000046330	ENSMUST00000212335			Rpl37a			protein_coding
e11ve16_cond1_538	chr1	72761076	72761714	+	7.322	NA	Intergenic	Intergenic	49614	ENSMUST00000211963.1	ENSMUSG00000046330	ENSMUST00000212335			Rpl37a			protein_coding
e11ve16_cond1_539	chr1	72813851	72814384	+	7.92485	NA	Intergenic	Intergenic	-10386	ENSMUST00000047328.10	ENSMUSG00000039323	ENSMUST00000155703			Igfbp2			protein_coding
e11ve16_cond1_540	chr1	72823740	72824525	+	8.36817	NA	promoter-TSS (ENSMUST00000047328.10)	protein_coding-promoter-TSS (ENSMUST00000047328.10)	-371	ENSMUST00000047328.10	ENSMUSG00000039323	ENSMUST00000155703			Igfbp2			protein_coding
e11ve16_cond1_541	chr1	72824819	72825380	+	5.0774	NA	promoter-TSS (ENSMUST00000120564.1)	protein_coding-promoter-TSS (ENSMUST00000120564.1)	-223	ENSMUST00000120564.1	ENSMUSG00000039323	ENSMUST00000155703			Igfbp2			protein_coding
e11ve16_cond1_542	chr1	72854743	72855964	+	9.08403	NA	Intergenic	Intergenic	6654	ENSMUST00000155703.1	ENSMUSG00000039323	ENSMUST00000155703			Igfbp2			protein_coding
e11ve16_cond1_543	chr1	72856180	72857000	+	5.38243	NA	Intergenic	Intergenic	7891	ENSMUST00000155703.1	ENSMUSG00000039323	ENSMUST00000155703			Igfbp2			protein_coding
e11ve16_cond1_544	chr1	72872693	72873969	+	6.36764	NA	intron (ENSMUST00000027377.8, intron 1 of 3)	protein_coding-intron (ENSMUST00000027377.8, intron 1 of 3)	944	ENSMUST00000137339.1	ENSMUSG00000026185	ENSMUST00000027377			Igfbp5			protein_coding
e11ve16_cond1_545	chr1	72874563	72875240	+	5.24744	NA	promoter-TSS (ENSMUST00000027377.8)	protein_coding-promoter-TSS (ENSMUST00000027377.8)	-17	ENSMUST00000027377.8	ENSMUSG00000026185	ENSMUST00000027377			Igfbp5			protein_coding
e11ve16_cond1_546	chr1	72945402	72945888	+	4.58158	NA	Intergenic	Intergenic	-39199	ENSMUST00000188793.1	ENSMUSG00000101968	ENSMUST00000188349			1700027A15Rik			lncRNA
e11ve16_cond1_547	chr1	72953198	72953525	+	5.0746	NA	Intergenic	Intergenic	-31483	ENSMUST00000188793.1	ENSMUSG00000101968	ENSMUST00000188349			1700027A15Rik			lncRNA
e11ve16_cond1_548	chr1	73040448	73040834	+	11.8811	NA	Intergenic	Intergenic	16072	ENSMUST00000190525.1	ENSMUSG00000101968	ENSMUST00000188349			1700027A15Rik			lncRNA
e11ve16_cond1_549	chr1	73075529	73076007	+	5.12371	NA	Intergenic	Intergenic	51199	ENSMUST00000190525.1	ENSMUSG00000101968	ENSMUST00000188349			1700027A15Rik			lncRNA
e11ve16_cond1_550	chr1	73116323	73117387	+	16.5159	NA	Intergenic	Intergenic	92286	ENSMUST00000190525.1	ENSMUSG00000101968	ENSMUST00000188349			1700027A15Rik			lncRNA
e11ve16_cond1_551	chr1	73169756	73171096	+	13.1167	NA	Intergenic	Intergenic	38997	ENSMUST00000194107.1	ENSMUSG00000102266	ENSMUST00000194107			Gm38106			TEC
e11ve16_cond1_552	chr1	73218961	73219539	+	4.954	NA	Intergenic	Intergenic	-9827	ENSMUST00000194107.1	ENSMUSG00000102266	ENSMUST00000194107			Gm38106			TEC
e11ve16_cond1_553	chr1	73306956	73307616	+	4.38739	NA	TTS (ENSMUST00000190578.1)	lncRNA-TTS (ENSMUST00000190578.1)	4764	ENSMUST00000190038.1	ENSMUSG00000100697	ENSMUST00000190038			Gm29184			processed_pseudogene
e11ve16_cond1_554	chr1	73479139	73479627	+	3.82579	NA	Intergenic	Intergenic	-32663	ENSMUST00000185703.1	ENSMUSG00000100044	ENSMUST00000185703			Gm9553			processed_pseudogene
e11ve16_cond1_555	chr1	73681885	73682149	+	7.82403	NA	intron (ENSMUST00000189514.1, intron 6 of 8)	lncRNA-intron (ENSMUST00000189514.1, intron 6 of 8)	61930	ENSMUST00000191114.6	ENSMUSG00000100301	ENSMUST00000189514			6030407O03Rik			lncRNA
e11ve16_cond1_556	chr1	73683349	73684288	+	4.05932	NA	intron (ENSMUST00000189514.1, intron 6 of 8)	lncRNA-intron (ENSMUST00000189514.1, intron 6 of 8)	60129	ENSMUST00000191114.6	ENSMUSG00000100301	ENSMUST00000189514			6030407O03Rik			lncRNA
e11ve16_cond1_557	chr1	73744134	73744523	+	5.5549	NA	promoter-TSS (ENSMUST00000191114.6)	lncRNA-promoter-TSS (ENSMUST00000191114.6)	-381	ENSMUST00000191114.6	ENSMUSG00000100301	ENSMUST00000189514			6030407O03Rik			lncRNA
e11ve16_cond1_558	chr1	73787613	73788079	+	7.68501	NA	intron (ENSMUST00000188600.1, intron 7 of 7)	lncRNA-intron (ENSMUST00000188600.1, intron 7 of 7)	24136	ENSMUST00000158041.1	ENSMUSG00000088666	ENSMUST00000158041			Gm25329			rRNA
e11ve16_cond1_559	chr1	73938636	73938926	+	4.99295	NA	intron (ENSMUST00000185331.6, intron 14 of 26)	protein_coding-intron (ENSMUST00000169786.7, intron 21 of 34)	2233	ENSMUST00000189228.1	ENSMUSG00000055322	ENSMUST00000190389			Tns1			protein_coding
e11ve16_cond1_560	chr1	74000082	74000700	+	4.34101	NA	intron (ENSMUST00000191104.6, intron 6 of 32)	protein_coding-intron (ENSMUST00000169786.7, intron 6 of 34)	1176	ENSMUST00000190389.6	ENSMUSG00000055322	ENSMUST00000190389			Tns1			protein_coding
e11ve16_cond1_561	chr1	74024975	74025369	+	4.67229	NA	intron (ENSMUST00000191204.6, intron 3 of 7)	protein_coding-intron (ENSMUST00000191204.6, intron 3 of 7)	-8750	ENSMUST00000186381.6	ENSMUSG00000055322	ENSMUST00000190389			Tns1			protein_coding
e11ve16_cond1_562	chr1	74053632	74054741	+	9.5794	NA	intron (ENSMUST00000191204.6, intron 3 of 7)	protein_coding-intron (ENSMUST00000169786.7, intron 3 of 34)	-17029	ENSMUST00000190599.1	ENSMUSG00000055322	ENSMUST00000190389			Tns1			protein_coding
e11ve16_cond1_563	chr1	74059807	74060252	+	5.62478	NA	intron (ENSMUST00000191204.6, intron 3 of 7)	protein_coding-intron (ENSMUST00000169786.7, intron 3 of 34)	-22872	ENSMUST00000190599.1	ENSMUSG00000055322	ENSMUST00000190389			Tns1			protein_coding
e11ve16_cond1_564	chr1	74068271	74068543	+	3.6901	NA	intron (ENSMUST00000191204.6, intron 3 of 7)	protein_coding-intron (ENSMUST00000169786.7, intron 3 of 34)	22944	ENSMUST00000187584.6	ENSMUSG00000055322	ENSMUST00000190389			Tns1			protein_coding
e11ve16_cond1_565	chr1	74098238	74099297	+	4.53089	NA	intron (ENSMUST00000212888.1, intron 1 of 33)	protein_coding-intron (ENSMUST00000169786.7, intron 1 of 34)	-1899	ENSMUST00000188208.1	ENSMUSG00000055322	ENSMUST00000190389			Tns1			protein_coding
e11ve16_cond1_566	chr1	74712942	74714168	+	6.20462	NA	promoter-TSS (ENSMUST00000027356.6)	protein_coding-promoter-TSS (ENSMUST00000027356.6)	-19	ENSMUST00000027356.6	ENSMUSG00000026170	ENSMUST00000027356			Cyp27a1			protein_coding
e11ve16_cond1_567	chr1	74771034	74772691	+	5.84253	NA	promoter-TSS (ENSMUST00000006716.7)	protein_coding-promoter-TSS (ENSMUST00000006716.7)	-30	ENSMUST00000006716.7	ENSMUSG00000033227	ENSMUST00000189544			Wnt6			protein_coding
e11ve16_cond1_568	chr1	74783469	74783751	+	5.08841	NA	intron (ENSMUST00000189544.1, intron 1 of 1)	protein_coding-intron (ENSMUST00000006716.7, intron 3 of 3)	1171	ENSMUST00000189544.1	ENSMUSG00000033227	ENSMUST00000189544			Wnt6			protein_coding
e11ve16_cond1_569	chr1	74793973	74794921	+	5.28186	NA	intron (ENSMUST00000187238.1, intron 1 of 1)	protein_coding-intron (ENSMUST00000006718.14, intron 2 of 3)	1084	ENSMUST00000187238.1	ENSMUSG00000026167	ENSMUST00000187238			Wnt10a			protein_coding
e11ve16_cond1_570	chr1	74806603	74806930	+	5.28425	NA	Intergenic	Intergenic	13403	ENSMUST00000187238.1	ENSMUSG00000026167	ENSMUST00000187238			Wnt10a			protein_coding
e11ve16_cond1_571	chr1	74855152	74855438	+	4.18153	NA	exon (ENSMUST00000160379.3, exon 1 of 1)	protein_coding-exon (ENSMUST00000160379.3, exon 1 of 1)	361	ENSMUST00000160379.3	ENSMUSG00000090071	ENSMUST00000160379			Cdk5r2			protein_coding
e11ve16_cond1_572	chr1	74884703	74885352	+	8.36781	NA	promoter-TSS (ENSMUST00000162938.1)	protein_coding-promoter-TSS (ENSMUST00000162938.1)	295	ENSMUST00000159232.1	ENSMUSG00000055197	ENSMUST00000068631			Fev			protein_coding
e11ve16_cond1_573	chr1	74935341	74935582	+	6.6994	NA	intron (ENSMUST00000139950.7, intron 1 of 10)	protein_coding-intron (ENSMUST00000094844.3, intron 1 of 32)	131	ENSMUST00000130489.1	ENSMUSG00000047021	ENSMUST00000139950			Cfap65			protein_coding
e11ve16_cond1_574	chr1	74948315	74950107	+	6.95627	NA	intron (ENSMUST00000164097.3, intron 1 of 2)	protein_coding-intron (ENSMUST00000164097.3, intron 1 of 2)	2231	ENSMUST00000189364.1	ENSMUSG00000006538	ENSMUST00000164097			Ihh			protein_coding
e11ve16_cond1_575	chr1	74950986	74951247	+	3.98483	NA	exon (ENSMUST00000164097.3, exon 1 of 3)	protein_coding-exon (ENSMUST00000164097.3, exon 1 of 3)	326	ENSMUST00000189364.1	ENSMUSG00000006538	ENSMUST00000164097			Ihh			protein_coding
e11ve16_cond1_576	chr1	75211083	75211311	+	4.17115	NA	promoter-TSS (ENSMUST00000113623.7)	protein_coding-promoter-TSS (ENSMUST00000113623.7)	-43	ENSMUST00000188460.2	ENSMUSG00000026201	ENSMUST00000135484			Stk16			protein_coding
e11ve16_cond1_577	chr1	75248475	75248752	+	4.34436	NA	intron (ENSMUST00000027404.11, intron 20 of 22)	protein_coding-intron (ENSMUST00000027404.11, intron 20 of 22)	-3709	ENSMUST00000191154.1	ENSMUSG00000101840	ENSMUST00000191154			Gm28294			lncRNA
e11ve16_cond1_578	chr1	75337145	75337706	+	3.83937	NA	Intergenic	Intergenic	-19435	ENSMUST00000188652.6	ENSMUSG00000026209	ENSMUST00000187000			Dnpep			protein_coding
e11ve16_cond1_579	chr1	75337869	75338616	+	6.89407	NA	Intergenic	Intergenic	-20252	ENSMUST00000188652.6	ENSMUSG00000026209	ENSMUST00000187000			Dnpep			protein_coding
e11ve16_cond1_580	chr1	75360164	75361139	+	6.70725	NA	promoter-TSS (ENSMUST00000144894.1)	protein_coding-promoter-TSS (ENSMUST00000144894.1)	322	ENSMUST00000027409.9	ENSMUSG00000026208	ENSMUST00000144894			Des			protein_coding
e11ve16_cond1_581	chr1	75381781	75382953	+	9.75103	NA	intron (ENSMUST00000187214.1, intron 1 of 1)	protein_coding-intron (ENSMUST00000087122.11, intron 1 of 40)	229	ENSMUST00000125306.1	ENSMUSG00000026207	ENSMUST00000125118			Speg			protein_coding
e11ve16_cond1_582	chr1	75399245	75400600	+	5.48056	NA	promoter-TSS (ENSMUST00000113587.7)	protein_coding-promoter-TSS (ENSMUST00000113587.7)	-163	ENSMUST00000113589.7	ENSMUSG00000026207	ENSMUST00000125118			Speg			protein_coding
e11ve16_cond1_583	chr1	75422384	75423030	+	4.70071	NA	promoter-TSS (ENSMUST00000143679.1)	protein_coding-promoter-TSS (ENSMUST00000143679.1)	-803	ENSMUST00000143679.1	ENSMUSG00000026207	ENSMUST00000125118			Speg			protein_coding
e11ve16_cond1_584	chr1	75423251	75423556	+	5.26939	NA	promoter-TSS (ENSMUST00000143679.1)	protein_coding-promoter-TSS (ENSMUST00000143679.1)	-107	ENSMUST00000143679.1	ENSMUSG00000026207	ENSMUST00000125118			Speg			protein_coding
e11ve16_cond1_585	chr1	75450435	75451022	+	9.63173	NA	promoter-TSS (ENSMUST00000037708.9)	protein_coding-promoter-TSS (ENSMUST00000037708.9)	29	ENSMUST00000037708.9	ENSMUSG00000033007	ENSMUST00000113577			Asic4			protein_coding
e11ve16_cond1_586	chr1	75458437	75459253	+	4.06003	NA	intron (ENSMUST00000113577.7, intron 1 of 8)	protein_coding-intron (ENSMUST00000037708.9, intron 1 of 9)	8146	ENSMUST00000037708.9	ENSMUSG00000033007	ENSMUST00000113577			Asic4			protein_coding
e11ve16_cond1_587	chr1	75460953	75462118	+	7.46414	NA	intron (ENSMUST00000113577.7, intron 1 of 8)	protein_coding-intron (ENSMUST00000037708.9, intron 1 of 9)	9226	ENSMUST00000194916.1	ENSMUSG00000102605	ENSMUST00000194916			Gm37264			TEC
e11ve16_cond1_588	chr1	75486720	75487248	+	7.58295	NA	TTS (ENSMUST00000156705.1)	protein_coding-TTS (ENSMUST00000156705.1)	249	ENSMUST00000156499.1	ENSMUSG00000026211	ENSMUST00000129403			Obsl1			protein_coding
e11ve16_cond1_589	chr1	75495607	75495832	+	4.11818	NA	TTS (ENSMUST00000113565.2)	protein_coding-TTS (ENSMUST00000113565.2)	-2652	ENSMUST00000132252.1	ENSMUSG00000026211	ENSMUST00000129403			Obsl1			protein_coding
e11ve16_cond1_590	chr1	75506664	75506935	+	9.53026	NA	promoter-TSS (ENSMUST00000037330.4)	protein_coding-promoter-TSS (ENSMUST00000037330.4)	-278	ENSMUST00000037330.4	ENSMUSG00000032968	ENSMUST00000037330			Inha			protein_coding
e11ve16_cond1_591	chr1	75511695	75511960	+	11.0536	NA	Intergenic	Intergenic	2456	ENSMUST00000120142.1	ENSMUSG00000082745	ENSMUST00000120142			Gm15181			unprocessed_pseudogene
e11ve16_cond1_592	chr1	75645898	75646289	+	6.22215	NA	Intergenic	Intergenic	9703	ENSMUST00000121823.1	ENSMUSG00000082012	ENSMUST00000121823			Gm5257			processed_pseudogene
e11ve16_cond1_593	chr1	75732999	75733890	+	5.9759	NA	Intergenic	Intergenic	97054	ENSMUST00000121823.1	ENSMUSG00000082012	ENSMUST00000121823			Gm5257			processed_pseudogene
e11ve16_cond1_594	chr1	75926064	75926265	+	3.65348	NA	Intergenic	Intergenic	92592	ENSMUST00000188786.1	ENSMUSG00000099996	ENSMUST00000188786			Gm29065			lncRNA
e11ve16_cond1_595	chr1	76975727	76975969	+	3.98662	NA	intron (ENSMUST00000191156.1, intron 1 of 1)	lncRNA-intron (ENSMUST00000191156.1, intron 1 of 1)	51944	ENSMUST00000191156.1	ENSMUSG00000100534	ENSMUST00000191156			Gm816			lncRNA
e11ve16_cond1_596	chr1	77050885	77051374	+	4.15479	NA	Intergenic	Intergenic	-23337	ENSMUST00000191156.1	ENSMUSG00000100534	ENSMUST00000191156			Gm816			lncRNA
e11ve16_cond1_597	chr1	77081017	77081275	+	4.48734	NA	Intergenic	Intergenic	-53354	ENSMUST00000191156.1	ENSMUSG00000100534	ENSMUST00000191156			Gm816			lncRNA
e11ve16_cond1_598	chr1	77081394	77081595	+	3.72194	NA	Intergenic	Intergenic	-53702	ENSMUST00000191156.1	ENSMUSG00000100534	ENSMUST00000191156			Gm816			lncRNA
e11ve16_cond1_599	chr1	77174588	77175540	+	7.45621	NA	Intergenic	Intergenic	-28072	ENSMUST00000193479.1	ENSMUSG00000102904	ENSMUST00000193479			Gm38265			TEC
e11ve16_cond1_600	chr1	77926089	77927323	+	7.36907	NA	Intergenic	Intergenic	-28260	ENSMUST00000083281.1	ENSMUSG00000065215	ENSMUST00000083281			Gm26263			snRNA
e11ve16_cond1_601	chr1	78140507	78141461	+	14.8702	NA	intron (ENSMUST00000004994.15, intron 4 of 8)	protein_coding-intron (ENSMUST00000004994.15, intron 4 of 8)	55854	ENSMUST00000004994.15	ENSMUSG00000004872	ENSMUST00000087086			Pax3			protein_coding
e11ve16_cond1_602	chr1	78157637	78157839	+	3.92568	NA	intron (ENSMUST00000004994.15, intron 4 of 8)	protein_coding-intron (ENSMUST00000004994.15, intron 4 of 8)	39100	ENSMUST00000004994.15	ENSMUSG00000004872	ENSMUST00000087086			Pax3			protein_coding
e11ve16_cond1_603	chr1	78196821	78197075	+	3.62647	NA	promoter-TSS (ENSMUST00000004994.15)	protein_coding-promoter-TSS (ENSMUST00000004994.15)	-110	ENSMUST00000004994.15	ENSMUSG00000004872	ENSMUST00000087086			Pax3			protein_coding
e11ve16_cond1_604	chr1	78310514	78310963	+	3.31083	NA	intron (ENSMUST00000036172.9, intron 1 of 4)	protein_coding-intron (ENSMUST00000036172.9, intron 1 of 4)	393	ENSMUST00000036172.9	ENSMUSG00000032908	ENSMUST00000036172			Sgpp2			protein_coding
e11ve16_cond1_605	chr1	78364169	78364692	+	10.6259	NA	intron (ENSMUST00000036172.9, intron 2 of 4)	protein_coding-intron (ENSMUST00000036172.9, intron 2 of 4)	-11184	ENSMUST00000191857.1	ENSMUSG00000102945	ENSMUST00000191857			Gm37884			TEC
e11ve16_cond1_606	chr1	78615661	78616496	+	5.65561	NA	intron (ENSMUST00000186132.1, intron 1 of 1)	lncRNA-intron (ENSMUST00000186132.1, intron 1 of 1)	611	ENSMUST00000186132.1	ENSMUSG00000100562	ENSMUST00000186132			Gm29611			lncRNA
e11ve16_cond1_607	chr1	78648906	78649841	+	17.6068	NA	Intergenic	Intergenic	-8452	ENSMUST00000035779.14	ENSMUSG00000032883	ENSMUST00000142704			Acsl3			protein_coding
e11ve16_cond1_608	chr1	78657134	78657619	+	4.12314	NA	promoter-TSS (ENSMUST00000035779.14)	protein_coding-promoter-TSS (ENSMUST00000035779.14)	-449	ENSMUST00000035779.14	ENSMUSG00000032883	ENSMUST00000142704			Acsl3			protein_coding
e11ve16_cond1_609	chr1	78658953	78659201	+	4.41615	NA	intron (ENSMUST00000151622.1, intron 1 of 3)	protein_coding-intron (ENSMUST00000035779.14, intron 1 of 15)	637	ENSMUST00000151622.1	ENSMUSG00000079470	ENSMUST00000053760			Utp14b			protein_coding
e11ve16_cond1_610	chr1	78745182	78745712	+	6.92674	NA	Intergenic	Intergenic	39412	ENSMUST00000191249.1	ENSMUSG00000099377	ENSMUST00000191249			Gm6159			processed_pseudogene
e11ve16_cond1_611	chr1	79581712	79582023	+	4.29459	NA	Intergenic	Intergenic	39167	ENSMUST00000195349.1	ENSMUSG00000102235	ENSMUST00000195349			Gm37886			TEC
e11ve16_cond1_612	chr1	79671110	79671354	+	5.19234	NA	intron (ENSMUST00000162342.7, intron 1 of 4)	protein_coding-intron (ENSMUST00000159312.1, intron 1 of 4)	733	ENSMUST00000159312.1	ENSMUSG00000054702	ENSMUST00000159312			Ap1s3			protein_coding
e11ve16_cond1_613	chr1	79678419	79678977	+	4.28723	NA	Intergenic	Intergenic	-6726	ENSMUST00000162342.7	ENSMUSG00000054702	ENSMUST00000159312			Ap1s3			protein_coding
e11ve16_cond1_614	chr1	79848225	79848930	+	6.12556	NA	intron (ENSMUST00000190724.1, intron 1 of 4)	protein_coding-intron (ENSMUST00000027467.10, intron 1 of 8)	10058	ENSMUST00000191026.1	ENSMUSG00000026249	ENSMUST00000190724			Serpine2			protein_coding
e11ve16_cond1_615	chr1	80340262	80340634	+	18.3122	NA	promoter-TSS (ENSMUST00000163119.7)	protein_coding-promoter-TSS (ENSMUST00000163119.7)	32	ENSMUST00000163119.7	ENSMUSG00000004364	ENSMUST00000164108			Cul3			protein_coding
e11ve16_cond1_616	chr1	80757501	80758920	+	10.0991	NA	intron (ENSMUST00000191505.1, intron 1 of 13)	protein_coding-intron (ENSMUST00000077946.11, intron 1 of 55)	238	ENSMUST00000077946.11	ENSMUSG00000038608	ENSMUST00000187885			Dock10			protein_coding
e11ve16_cond1_617	chr1	81909040	81909338	+	5.3482	NA	Intergenic	Intergenic	111948	ENSMUST00000186198.1	ENSMUSG00000100561	ENSMUST00000186198			Gm7516			processed_pseudogene
e11ve16_cond1_618	chr1	82682408	82682786	+	8.64874	NA	intron (ENSMUST00000113457.8, intron 33 of 51)	protein_coding-intron (ENSMUST00000113457.8, intron 33 of 51)	-32707	ENSMUST00000152664.1	ENSMUSG00000079465	ENSMUST00000152664			Col4a3			protein_coding
e11ve16_cond1_619	chr1	82725386	82725652	+	3.76765	NA	promoter-TSS (ENSMUST00000181720.1)	lncRNA-promoter-TSS (ENSMUST00000181720.1)	-350	ENSMUST00000186858.1	ENSMUSG00000097564	ENSMUST00000181720			C430014B12Rik			lncRNA
e11ve16_cond1_620	chr1	82766744	82767167	+	7.54876	NA	intron (ENSMUST00000138787.1, intron 1 of 2)	protein_coding-intron (ENSMUST00000027331.2, intron 1 of 3)	1506	ENSMUST00000027331.2	ENSMUSG00000026149	ENSMUST00000138787			Tm4sf20			protein_coding
e11ve16_cond1_621	chr1	83268317	83268706	+	4.54625	NA	intron (ENSMUST00000159078.1, intron 1 of 5)	protein_coding-intron (ENSMUST00000053075.14, intron 8 of 9)	10654	ENSMUST00000159078.1	ENSMUSG00000026163	ENSMUST00000160953			Sphkap			protein_coding
e11ve16_cond1_622	chr1	83327076	83327359	+	3.4962	NA	intron (ENSMUST00000053075.14, intron 4 of 9)	protein_coding-intron (ENSMUST00000053075.14, intron 4 of 9)	5369	ENSMUST00000194004.1	ENSMUSG00000104374	ENSMUST00000194004			Gm37517			TEC
e11ve16_cond1_623	chr1	83407630	83407854	+	3.92759	NA	intron (ENSMUST00000160567.1, intron 1 of 1)	protein_coding-intron (ENSMUST00000053075.14, intron 1 of 9)	397	ENSMUST00000160237.1	ENSMUSG00000026163	ENSMUST00000160953			Sphkap			protein_coding
e11ve16_cond1_624	chr1	83712888	83713694	+	7.51328	NA	intron (ENSMUST00000189405.6, intron 3 of 4)	lncRNA-intron (ENSMUST00000189405.6, intron 3 of 4)	-82621	ENSMUST00000178653.1	ENSMUSG00000094946	ENSMUST00000178653			Gm25754			miRNA
e11ve16_cond1_625	chr1	84278712	84278916	+	3.74862	NA	intron (ENSMUST00000176822.1, intron 2 of 4)	protein_coding-intron (ENSMUST00000168574.8, intron 1 of 2)	5609	ENSMUST00000176720.1	ENSMUSG00000045658	ENSMUST00000175996			Pid1			protein_coding
e11ve16_cond1_626	chr1	84283783	84284363	+	3.54712	NA	exon (ENSMUST00000187992.1, exon 1 of 1)	protein_coding-exon (ENSMUST00000187992.1, exon 1 of 1)	350	ENSMUST00000176720.1	ENSMUSG00000045658	ENSMUST00000175996			Pid1			protein_coding
e11ve16_cond1_627	chr1	84851284	84852216	+	9.24623	NA	intron (ENSMUST00000143656.7, intron 2 of 4)	protein_coding-intron (ENSMUST00000097672.3, intron 1 of 3)	-11234	ENSMUST00000186465.6	ENSMUSG00000026219	ENSMUST00000190474			Trip12			protein_coding
e11ve16_cond1_628	chr1	84933681	84935340	+	12.2974	NA	intron (ENSMUST00000027422.6, intron 1 of 4)	protein_coding-intron (ENSMUST00000027422.6, intron 1 of 4)	347	ENSMUST00000186980.1	ENSMUSG00000026220	ENSMUST00000027422			Slc16a14			protein_coding
e11ve16_cond1_629	chr1	85720233	85720592	+	3.639	NA	intron (ENSMUST00000159122.7, intron 6 of 7)	protein_coding-intron (ENSMUST00000064788.13, intron 4 of 5)	16142	ENSMUST00000161453.1	ENSMUSG00000052760	ENSMUST00000159122			A630001G21Rik			protein_coding
e11ve16_cond1_630	chr1	85758504	85758725	+	6.86141	NA	intron (ENSMUST00000159122.7, intron 3 of 7)	protein_coding-intron (ENSMUST00000159122.7, intron 3 of 7)	-5180	ENSMUST00000175454.3	ENSMUSG00000094834	ENSMUST00000175454			Gm25472			miRNA
e11ve16_cond1_631	chr1	85793913	85794708	+	5.77935	NA	promoter-TSS (ENSMUST00000097666.3)	protein_coding-promoter-TSS (ENSMUST00000097666.3)	-158	ENSMUST00000130754.7	ENSMUSG00000036707	ENSMUST00000187623			Cab39			protein_coding
e11ve16_cond1_632	chr1	85810227	85810890	+	5.32203	NA	intron (ENSMUST00000097666.3, intron 2 of 9)	protein_coding-intron (ENSMUST00000097666.3, intron 2 of 9)	16047	ENSMUST00000097666.3	ENSMUSG00000036707	ENSMUST00000187623			Cab39			protein_coding
e11ve16_cond1_633	chr1	85811023	85811367	+	8.43356	NA	intron (ENSMUST00000097666.3, intron 2 of 9)	protein_coding-intron (ENSMUST00000097666.3, intron 2 of 9)	16684	ENSMUST00000097666.3	ENSMUSG00000036707	ENSMUST00000187623			Cab39			protein_coding
e11ve16_cond1_634	chr1	85916969	85917336	+	4.26633	NA	Intergenic	Intergenic	10991	ENSMUST00000139837.1	ENSMUSG00000026223	ENSMUST00000185569			Itm2c			protein_coding
e11ve16_cond1_635	chr1	85933516	85934250	+	7.84167	NA	exon (ENSMUST00000190367.1, exon 2 of 2)	lncRNA-exon (ENSMUST00000190367.1, exon 2 of 2)	3449	ENSMUST00000190367.1	ENSMUSG00000099767	ENSMUST00000190367			Gm28884			lncRNA
e11ve16_cond1_636	chr1	85936498	85937125	+	8.92125	NA	exon (ENSMUST00000190367.1, exon 1 of 2)	lncRNA-exon (ENSMUST00000190367.1, exon 1 of 2)	521	ENSMUST00000190367.1	ENSMUSG00000099767	ENSMUST00000190367			Gm28884			lncRNA
e11ve16_cond1_637	chr1	86018303	86019136	+	4.46088	NA	exon (ENSMUST00000149469.2, exon 1 of 4)	protein_coding-exon (ENSMUST00000149469.2, exon 1 of 4)	651	ENSMUST00000149469.2	ENSMUSG00000026226	ENSMUST00000152501			Spata3			protein_coding
e11ve16_cond1_638	chr1	86048681	86049158	+	5.81617	NA	intron (ENSMUST00000165824.2, intron 2 of 2)	protein_coding-intron (ENSMUST00000027429.10, intron 2 of 2)	3056	ENSMUST00000165824.2	ENSMUSG00000026227	ENSMUST00000165824			2810459M11Rik			protein_coding
e11ve16_cond1_639	chr1	86294448	86294951	+	6.84536	NA	intron (ENSMUST00000126385.1, intron 1 of 3)	lncRNA-intron (ENSMUST00000126385.1, intron 1 of 3)	6676	ENSMUST00000126385.1	ENSMUSG00000087538	ENSMUST00000126385			Gm16341			lncRNA
e11ve16_cond1_640	chr1	86311121	86311892	+	5.3123	NA	Intergenic	Intergenic	-7447	ENSMUST00000187004.1	ENSMUSG00000099644	ENSMUST00000187004			Gm28626			lncRNA
e11ve16_cond1_641	chr1	86339214	86339674	+	4.12425	NA	Intergenic	Intergenic	11405	ENSMUST00000186141.1	ENSMUSG00000101853	ENSMUST00000186141			Gm28627			processed_pseudogene
e11ve16_cond1_642	chr1	86440731	86441985	+	8.82129	NA	Intergenic	Intergenic	15029	ENSMUST00000046004.5	ENSMUSG00000036574	ENSMUST00000046004			Tex44			protein_coding
e11ve16_cond1_643	chr1	86442536	86442962	+	3.85119	NA	Intergenic	Intergenic	16420	ENSMUST00000046004.5	ENSMUSG00000036574	ENSMUST00000046004			Tex44			protein_coding
e11ve16_cond1_644	chr1	86501482	86502163	+	7.11737	NA	Intergenic	Intergenic	-24904	ENSMUST00000045897.14	ENSMUSG00000026238	ENSMUST00000186255			Ptma			protein_coding
e11ve16_cond1_645	chr1	86502716	86503470	+	10.3093	NA	Intergenic	Intergenic	-23633	ENSMUST00000045897.14	ENSMUSG00000026238	ENSMUST00000186255			Ptma			protein_coding
e11ve16_cond1_646	chr1	86504561	86504826	+	4.21922	NA	Intergenic	Intergenic	-22033	ENSMUST00000045897.14	ENSMUSG00000026238	ENSMUST00000186255			Ptma			protein_coding
e11ve16_cond1_647	chr1	86525240	86526083	+	7.89521	NA	Intergenic	Intergenic	-1065	ENSMUST00000045897.14	ENSMUSG00000026238	ENSMUST00000186255			Ptma			protein_coding
e11ve16_cond1_648	chr1	86526988	86527188	+	4.13141	NA	intron (ENSMUST00000045897.14, intron 1 of 4)	protein_coding-intron (ENSMUST00000045897.14, intron 1 of 4)	281	ENSMUST00000188533.1	ENSMUSG00000026238	ENSMUST00000186255			Ptma			protein_coding
e11ve16_cond1_649	chr1	86531499	86532628	+	18.4945	NA	Intergenic	Intergenic	5256	ENSMUST00000188533.1	ENSMUSG00000026238	ENSMUST00000186255			Ptma			protein_coding
e11ve16_cond1_650	chr1	86634664	86634904	+	9.344	NA	Intergenic	Intergenic	2824	ENSMUST00000122519.1	ENSMUSG00000084468	ENSMUST00000122519			Gm22955			miRNA
e11ve16_cond1_651	chr1	86669678	86670566	+	5.3882	NA	intron (ENSMUST00000027449.5, intron 1 of 2)	protein_coding-intron (ENSMUST00000027449.5, intron 1 of 2)	449	ENSMUST00000027449.5	ENSMUSG00000026241	ENSMUST00000027449			Nppc			protein_coding
e11ve16_cond1_652	chr1	87041338	87041690	+	4.81222	NA	intron (ENSMUST00000168237.7, intron 15 of 21)	protein_coding-intron (ENSMUST00000065694.7, intron 14 of 20)	4791	ENSMUST00000195625.1	ENSMUSG00000103984	ENSMUST00000195625			Gm37447			TEC
e11ve16_cond1_653	chr1	87154688	87154933	+	4.28118	NA	TTS (ENSMUST00000159662.1)	protein_coding-TTS (ENSMUST00000159662.1)	217	ENSMUST00000027463.10	ENSMUSG00000026247	ENSMUST00000159662			Ecel1			protein_coding
e11ve16_cond1_654	chr1	87155875	87156344	+	5.02635	NA	promoter-TSS (ENSMUST00000159662.1)	protein_coding-promoter-TSS (ENSMUST00000159662.1)	56	ENSMUST00000160810.1	ENSMUSG00000026247	ENSMUST00000159662			Ecel1			protein_coding
e11ve16_cond1_655	chr1	87174444	87174759	+	8.36491	NA	Intergenic	Intergenic	-8712	ENSMUST00000044533.8	ENSMUSG00000036480	ENSMUST00000044533			Prss56			protein_coding
e11ve16_cond1_656	chr1	87186187	87186973	+	9.37001	NA	exon (ENSMUST00000044533.8, exon 9 of 13)	protein_coding-exon (ENSMUST00000044533.8, exon 9 of 13)	3267	ENSMUST00000044533.8	ENSMUSG00000036480	ENSMUST00000044533			Prss56			protein_coding
e11ve16_cond1_657	chr1	87214306	87215014	+	7.08536	NA	intron (ENSMUST00000123735.7, intron 2 of 5)	protein_coding-intron (ENSMUST00000050876.13, intron 1 of 6)	374	ENSMUST00000113231.3	ENSMUSG00000026254	ENSMUST00000113231			Eif4e2			protein_coding
e11ve16_cond1_658	chr1	87264449	87265325	+	7.3624	NA	intron (ENSMUST00000118687.7, intron 1 of 4)	protein_coding-intron (ENSMUST00000027472.6, intron 1 of 3)	287	ENSMUST00000138844.2	ENSMUSG00000089821	ENSMUST00000138844			Efhd1os			lncRNA
e11ve16_cond1_659	chr1	87270202	87271222	+	7.11479	NA	intron (ENSMUST00000118687.7, intron 1 of 4)	protein_coding-intron (ENSMUST00000027472.6, intron 1 of 3)	-5538	ENSMUST00000138844.2	ENSMUSG00000089821	ENSMUST00000138844			Efhd1os			lncRNA
e11ve16_cond1_660	chr1	87475320	87475791	+	4.39583	NA	TTS (ENSMUST00000027476.5)	protein_coding-TTS (ENSMUST00000027476.5)	3016	ENSMUST00000191095.1	ENSMUSG00000026258	ENSMUST00000027476			Snorc			protein_coding
e11ve16_cond1_661	chr1	87509491	87509845	+	3.87288	NA	promoter-TSS (ENSMUST00000166055.7)	protein_coding-promoter-TSS (ENSMUST00000166055.7)	-221	ENSMUST00000166055.7	ENSMUSG00000079434	ENSMUST00000070898			Neu2			protein_coding
e11ve16_cond1_662	chr1	87878143	87878486	+	4.18238	NA	intron (ENSMUST00000027517.13, intron 1 of 29)	protein_coding-intron (ENSMUST00000027517.13, intron 1 of 29)	-2121	ENSMUST00000190243.1	ENSMUSG00000070738	ENSMUST00000027517			Dgkd			protein_coding
e11ve16_cond1_663	chr1	88429216	88429430	+	3.72182	NA	Intergenic	Intergenic	21917	ENSMUST00000189225.1	ENSMUSG00000026295	ENSMUST00000176708			Spp2			protein_coding
e11ve16_cond1_664	chr1	88502781	88503389	+	6.02411	NA	intron (ENSMUST00000067625.8, intron 2 of 2)	protein_coding-intron (ENSMUST00000067625.8, intron 2 of 2)	6981	ENSMUST00000067625.8	ENSMUSG00000062310	ENSMUST00000067625			Glrp1			protein_coding
e11ve16_cond1_665	chr1	88639712	88640514	+	4.04685	NA	Intergenic	Intergenic	-12972	ENSMUST00000194311.1	ENSMUSG00000104057	ENSMUST00000194311			Gm38130			TEC
e11ve16_cond1_666	chr1	88669423	88669818	+	4.14861	NA	Intergenic	Intergenic	13312	ENSMUST00000186042.1	ENSMUSG00000100367	ENSMUST00000186042			Gm29336			lncRNA
e11ve16_cond1_667	chr1	88670115	88670994	+	6.60062	NA	Intergenic	Intergenic	14246	ENSMUST00000186042.1	ENSMUSG00000100367	ENSMUST00000186042			Gm29336			lncRNA
e11ve16_cond1_668	chr1	88700098	88701041	+	9.01402	NA	exon (ENSMUST00000159814.1, exon 1 of 1)	protein_coding-exon (ENSMUST00000159814.1, exon 1 of 1)	1307	ENSMUST00000187810.1	ENSMUSG00000049866	ENSMUST00000159814			Arl4c			protein_coding
e11ve16_cond1_669	chr1	88938240	88938650	+	6.50077	NA	Intergenic	Intergenic	6126	ENSMUST00000188327.1	ENSMUSG00000101333	ENSMUST00000188327			Gm4753			processed_pseudogene
e11ve16_cond1_670	chr1	89092187	89092761	+	4.11848	NA	intron (ENSMUST00000066279.10, intron 1 of 5)	protein_coding-intron (ENSMUST00000066279.10, intron 1 of 5)	-4599	ENSMUST00000195426.1	ENSMUSG00000102700	ENSMUST00000195426			Gm38312			TEC
e11ve16_cond1_671	chr1	89109035	89110071	+	6.42705	NA	intron (ENSMUST00000066279.10, intron 2 of 5)	protein_coding-intron (ENSMUST00000066279.10, intron 2 of 5)	12480	ENSMUST00000195426.1	ENSMUSG00000102700	ENSMUST00000195426			Gm38312			TEC
e11ve16_cond1_672	chr1	89165061	89165429	+	4.57325	NA	Intergenic	Intergenic	68172	ENSMUST00000195426.1	ENSMUSG00000102700	ENSMUST00000195426			Gm38312			TEC
e11ve16_cond1_673	chr1	89182909	89183743	+	7.74048	NA	Intergenic	Intergenic	73655	ENSMUST00000191231.1	ENSMUSG00000102083	ENSMUST00000191231			Gm5259			processed_pseudogene
e11ve16_cond1_674	chr1	89510260	89510502	+	6.13296	NA	intron (ENSMUST00000190096.6, intron 1 of 16)	protein_coding-intron (ENSMUST00000027521.14, intron 1 of 17)	26943	ENSMUST00000192974.1	ENSMUSG00000104114	ENSMUST00000192974			Gm37297			TEC
e11ve16_cond1_675	chr1	89516825	89518447	+	8.34466	NA	intron (ENSMUST00000190096.6, intron 1 of 16)	protein_coding-intron (ENSMUST00000027521.14, intron 1 of 17)	34198	ENSMUST00000192974.1	ENSMUSG00000104114	ENSMUST00000192974			Gm37297			TEC
e11ve16_cond1_676	chr1	89528698	89528950	+	4.9532	NA	intron (ENSMUST00000190096.6, intron 1 of 16)	protein_coding-intron (ENSMUST00000027521.14, intron 1 of 17)	-34536	ENSMUST00000157746.1	ENSMUSG00000088371	ENSMUST00000157746			Gm25180			rRNA
e11ve16_cond1_677	chr1	89581040	89581828	+	6.63541	NA	exon (ENSMUST00000074945.7, exon 1 of 18)	protein_coding-exon (ENSMUST00000074945.7, exon 1 of 18)	1198	ENSMUST00000074945.7	ENSMUSG00000055013	ENSMUST00000190096			Agap1			protein_coding
e11ve16_cond1_678	chr1	89646293	89646563	+	3.33103	NA	intron (ENSMUST00000074945.7, intron 7 of 17)	protein_coding-intron (ENSMUST00000027521.14, intron 6 of 17)	37460	ENSMUST00000187011.1	ENSMUSG00000102009	ENSMUST00000187295			4933400F21Rik			lncRNA
e11ve16_cond1_679	chr1	89750307	89750550	+	9.14604	NA	intron (ENSMUST00000074945.7, intron 12 of 17)	protein_coding-intron (ENSMUST00000027521.14, intron 11 of 17)	-38735	ENSMUST00000212924.1	ENSMUSG00000055013	ENSMUST00000190096			Agap1			protein_coding
e11ve16_cond1_680	chr1	89763904	89764733	+	7.56059	NA	intron (ENSMUST00000074945.7, intron 12 of 17)	protein_coding-intron (ENSMUST00000027521.14, intron 11 of 17)	-24845	ENSMUST00000212924.1	ENSMUSG00000055013	ENSMUST00000190096			Agap1			protein_coding
e11ve16_cond1_681	chr1	89885320	89885839	+	5.11567	NA	intron (ENSMUST00000190096.6, intron 15 of 16)	protein_coding-intron (ENSMUST00000027521.14, intron 16 of 17)	43606	ENSMUST00000187633.1	ENSMUSG00000034486	ENSMUST00000187633			Gbx2			protein_coding
e11ve16_cond1_682	chr1	89921902	89922478	+	7.48171	NA	Intergenic	Intergenic	6995	ENSMUST00000187633.1	ENSMUSG00000034486	ENSMUST00000187633			Gbx2			protein_coding
e11ve16_cond1_683	chr1	89922938	89923405	+	10.1722	NA	Intergenic	Intergenic	6014	ENSMUST00000187633.1	ENSMUSG00000034486	ENSMUST00000187633			Gbx2			protein_coding
e11ve16_cond1_684	chr1	89930500	89931639	+	4.97741	NA	exon (ENSMUST00000036954.8, exon 1 of 2)	protein_coding-exon (ENSMUST00000036954.8, exon 1 of 2)	110	ENSMUST00000036954.8	ENSMUSG00000034486	ENSMUST00000187633			Gbx2			protein_coding
e11ve16_cond1_685	chr1	89943391	89943873	+	8.15573	NA	Intergenic	Intergenic	-12453	ENSMUST00000036954.8	ENSMUSG00000034486	ENSMUST00000187633			Gbx2			protein_coding
e11ve16_cond1_686	chr1	89968196	89969078	+	10.084	NA	exon (ENSMUST00000086882.7, exon 4 of 6)	protein_coding-exon (ENSMUST00000086882.7, exon 4 of 6)	27815	ENSMUST00000238685.1	ENSMUSG00000067081	ENSMUST00000154228			Asb18			protein_coding
e11ve16_cond1_687	chr1	89997814	89998145	+	11.8056	NA	intron (ENSMUST00000086882.7, intron 1 of 5)	protein_coding-intron (ENSMUST00000086882.7, intron 1 of 5)	-1527	ENSMUST00000238685.1	ENSMUSG00000067081	ENSMUST00000154228			Asb18			protein_coding
e11ve16_cond1_688	chr1	90152957	90154010	+	5.47838	NA	promoter-TSS (ENSMUST00000113094.8)	protein_coding-promoter-TSS (ENSMUST00000113094.8)	-82	ENSMUST00000186522.1	ENSMUSG00000026301	ENSMUST00000189011			Iqca			protein_coding
e11ve16_cond1_689	chr1	90202294	90202532	+	3.67557	NA	Intergenic	Intergenic	-1567	ENSMUST00000065587.4	ENSMUSG00000044337	ENSMUST00000159654			Ackr3			protein_coding
e11ve16_cond1_690	chr1	90202653	90203800	+	4.48199	NA	promoter-TSS (ENSMUST00000065587.4)	protein_coding-promoter-TSS (ENSMUST00000065587.4)	-754	ENSMUST00000065587.4	ENSMUSG00000044337	ENSMUST00000159654			Ackr3			protein_coding
e11ve16_cond1_691	chr1	90442530	90443067	+	6.45376	NA	Intergenic	Intergenic	11703	ENSMUST00000187630.1	ENSMUSG00000101997	ENSMUST00000187630			Gm28722			lncRNA
e11ve16_cond1_692	chr1	90451281	90451950	+	6.48851	NA	Intergenic	Intergenic	2886	ENSMUST00000187630.1	ENSMUSG00000101997	ENSMUST00000187630			Gm28722			lncRNA
e11ve16_cond1_693	chr1	90518778	90519040	+	4.69023	NA	Intergenic	Intergenic	-1587	ENSMUST00000192105.1	ENSMUSG00000103292	ENSMUST00000192105			Gm35048			TEC
e11ve16_cond1_694	chr1	90775757	90776274	+	6.22805	NA	exon (ENSMUST00000056925.15, exon 40 of 44)	protein_coding-exon (ENSMUST00000056925.15, exon 40 of 44)	-2800	ENSMUST00000150769.1	ENSMUSG00000048126	ENSMUST00000097653			Col6a3			protein_coding
e11ve16_cond1_695	chr1	90999295	90999727	+	4.40464	NA	intron (ENSMUST00000189505.6, intron 1 of 12)	protein_coding-intron (ENSMUST00000068116.12, intron 1 of 12)	732	ENSMUST00000068116.12	ENSMUSG00000026305	ENSMUST00000187532			Lrrfip1			protein_coding
e11ve16_cond1_696	chr1	91179995	91181938	+	8.43376	NA	intron (ENSMUST00000188475.6, intron 1 of 3)	protein_coding-intron (ENSMUST00000097648.5, intron 1 of 2)	920	ENSMUST00000097648.5	ENSMUSG00000034353	ENSMUST00000097648			Ramp1			protein_coding
e11ve16_cond1_697	chr1	91344780	91345381	+	3.97687	NA	exon (ENSMUST00000088904.9, exon 9 of 9)	protein_coding-exon (ENSMUST00000088904.9, exon 9 of 9)	-5936	ENSMUST00000027533.8	ENSMUSG00000026308	ENSMUST00000027533			Klhl30			protein_coding
e11ve16_cond1_698	chr1	91412632	91413068	+	3.53774	NA	exon (ENSMUST00000155752.1, exon 2 of 3)	protein_coding-exon (ENSMUST00000155752.1, exon 2 of 3)	358	ENSMUST00000132188.7	ENSMUSG00000067071	ENSMUST00000155752			Hes6			protein_coding
e11ve16_cond1_699	chr1	91413501	91414173	+	6.65132	NA	promoter-TSS (ENSMUST00000086851.1)	protein_coding-promoter-TSS (ENSMUST00000086851.1)	201	ENSMUST00000150520.1	ENSMUSG00000067071	ENSMUST00000155752			Hes6			protein_coding
e11ve16_cond1_700	chr1	91443230	91443529	+	5.37754	NA	intron (ENSMUST00000069620.9, intron 6 of 22)	protein_coding-intron (ENSMUST00000069620.9, intron 6 of 22)	6486	ENSMUST00000185298.1	ENSMUSG00000055866	ENSMUST00000185298			Per2			protein_coding
e11ve16_cond1_701	chr1	91495068	91495335	+	4.90555	NA	intron (ENSMUST00000189341.6, intron 1 of 15)	protein_coding-intron (ENSMUST00000047242.8, intron 1 of 14)	507	ENSMUST00000047242.8	ENSMUSG00000034292	ENSMUST00000187588			Traf3ip1			protein_coding
e11ve16_cond1_702	chr1	91801537	91801770	+	4.65877	NA	exon (ENSMUST00000007949.3, exon 1 of 2)	protein_coding-exon (ENSMUST00000007949.3, exon 1 of 2)	183	ENSMUST00000186075.1	ENSMUSG00000007805	ENSMUST00000186075			Twist2			protein_coding
e11ve16_cond1_703	chr1	91871692	91872334	+	4.61435	NA	Intergenic	Intergenic	-44247	ENSMUST00000193764.1	ENSMUSG00000102745	ENSMUST00000193764			Gm37600			TEC
e11ve16_cond1_704	chr1	92179428	92180357	+	14.3454	NA	intron (ENSMUST00000212408.1, intron 1 of 3)	protein_coding-intron (ENSMUST00000097644.8, intron 1 of 26)	405	ENSMUST00000186002.2	ENSMUSG00000026313	ENSMUST00000187308			Hdac4			protein_coding
e11ve16_cond1_705	chr1	92647953	92648251	+	4.7956	NA	exon (ENSMUST00000159803.1, exon 1 of 4)	protein_coding-exon (ENSMUST00000159803.1, exon 1 of 4)	152	ENSMUST00000159803.1	ENSMUSG00000044055	ENSMUST00000159803			Otos			protein_coding
e11ve16_cond1_706	chr1	92832150	92832725	+	4.54701	NA	intron (ENSMUST00000045970.7, intron 1 of 8)	protein_coding-intron (ENSMUST00000045970.7, intron 1 of 8)	468	ENSMUST00000191373.1	ENSMUSG00000034220	ENSMUST00000045970			Gpc1			protein_coding
e11ve16_cond1_707	chr1	92832947	92833148	+	7.03842	NA	intron (ENSMUST00000045970.7, intron 1 of 8)	protein_coding-intron (ENSMUST00000045970.7, intron 1 of 8)	1078	ENSMUST00000191373.1	ENSMUSG00000034220	ENSMUST00000045970			Gpc1			protein_coding
e11ve16_cond1_708	chr1	92833575	92834129	+	7.13487	NA	intron (ENSMUST00000045970.7, intron 1 of 8)	protein_coding-intron (ENSMUST00000045970.7, intron 1 of 8)	1883	ENSMUST00000191373.1	ENSMUSG00000034220	ENSMUST00000045970			Gpc1			protein_coding
e11ve16_cond1_709	chr1	92956878	92957132	+	4.3716	NA	intron (ENSMUST00000189697.1, intron 1 of 2)	protein_coding-intron (ENSMUST00000185421.1, intron 1 of 1)	841	ENSMUST00000189697.1	ENSMUSG00000026271	ENSMUST00000186298			Gpr35			protein_coding
e11ve16_cond1_710	chr1	92979310	92979525	+	4.73575	NA	intron (ENSMUST00000169198.2, intron 1 of 1)	protein_coding-intron (ENSMUST00000027489.8, intron 1 of 1)	495	ENSMUST00000169198.2	ENSMUSG00000026271	ENSMUST00000186298			Gpr35			protein_coding
e11ve16_cond1_711	chr1	93100234	93102174	+	9.72901	NA	intron (ENSMUST00000186861.1, intron 1 of 4)	protein_coding-intron (ENSMUST00000186861.1, intron 1 of 4)	618	ENSMUST00000171796.7	ENSMUSG00000014602	ENSMUST00000190723			Kif1a			protein_coding
e11ve16_cond1_712	chr1	93115331	93115772	+	6.83928	NA	Intergenic	Intergenic	8552	ENSMUST00000191586.1	ENSMUSG00000101378	ENSMUST00000191586			Gm28086			lncRNA
e11ve16_cond1_713	chr1	93129674	93130198	+	4.92603	NA	Intergenic	Intergenic	-5304	ENSMUST00000027491.6	ENSMUSG00000026272	ENSMUST00000191039			Agxt			protein_coding
e11ve16_cond1_714	chr1	93168198	93168448	+	7.6057	NA	promoter-TSS (ENSMUST00000138595.2)	protein_coding-promoter-TSS (ENSMUST00000138595.2)	-402	ENSMUST00000138595.2	ENSMUSG00000084989	ENSMUST00000138595			Crocc2			protein_coding
e11ve16_cond1_715	chr1	93168866	93169104	+	4.41254	NA	intron (ENSMUST00000138595.2, intron 1 of 31)	protein_coding-intron (ENSMUST00000138595.2, intron 1 of 31)	260	ENSMUST00000138595.2	ENSMUSG00000084989	ENSMUST00000138595			Crocc2			protein_coding
e11ve16_cond1_716	chr1	93190631	93190852	+	4.96814	NA	intron (ENSMUST00000138595.2, intron 10 of 31)	protein_coding-intron (ENSMUST00000138595.2, intron 10 of 31)	22016	ENSMUST00000138595.2	ENSMUSG00000084989	ENSMUST00000138595			Crocc2			protein_coding
e11ve16_cond1_717	chr1	93223596	93223863	+	3.85439	NA	intron (ENSMUST00000138595.2, intron 29 of 31)	protein_coding-intron (ENSMUST00000138595.2, intron 29 of 31)	-12112	ENSMUST00000062202.13	ENSMUSG00000047793	ENSMUST00000062202			Sned1			protein_coding
e11ve16_cond1_718	chr1	93305988	93306217	+	3.68194	NA	promoter-TSS (ENSMUST00000027492.13)	protein_coding-promoter-TSS (ENSMUST00000027492.13)	138	ENSMUST00000188069.1	ENSMUSG00000101172	ENSMUST00000188069			Gm28535			lncRNA
e11ve16_cond1_719	chr1	93342479	93342678	+	4.35539	NA	promoter-TSS (ENSMUST00000027494.10)	protein_coding-promoter-TSS (ENSMUST00000027494.10)	211	ENSMUST00000027493.3	ENSMUSG00000026274	ENSMUST00000133886			Pask			protein_coding
e11ve16_cond1_720	chr1	93343879	93344086	+	3.76718	NA	promoter-TSS (ENSMUST00000128253.1)	protein_coding-promoter-TSS (ENSMUST00000128253.1)	275	ENSMUST00000127141.1	ENSMUSG00000026275	ENSMUST00000185498			Ppp1r7			protein_coding
e11ve16_cond1_721	chr1	93466348	93467143	+	6.03677	NA	intron (ENSMUST00000189025.6, intron 1 of 5)	protein_coding-intron (ENSMUST00000170883.7, intron 1 of 27)	11632	ENSMUST00000188165.1	ENSMUSG00000034088	ENSMUST00000185349			Hdlbp			protein_coding
e11ve16_cond1_722	chr1	93560607	93560838	+	6.18134	NA	intron (ENSMUST00000122402.2, intron 3 of 12)	protein_coding-intron (ENSMUST00000120301.7, intron 3 of 26)	28907	ENSMUST00000194919.1	ENSMUSG00000103854	ENSMUST00000194919			Gm37250			TEC
e11ve16_cond1_723	chr1	93569702	93570278	+	4.93096	NA	exon (ENSMUST00000120301.7, exon 8 of 27)	protein_coding-exon (ENSMUST00000120301.7, exon 8 of 27)	38175	ENSMUST00000194919.1	ENSMUSG00000103854	ENSMUST00000194919			Gm37250			TEC
e11ve16_cond1_724	chr1	93685473	93687033	+	4.72854	NA	promoter-TSS (ENSMUST00000188394.1)	protein_coding-promoter-TSS (ENSMUST00000188394.1)	-10	ENSMUST00000188394.1	ENSMUSG00000026278	ENSMUST00000200888			Bok			protein_coding
e11ve16_cond1_725	chr1	93705855	93706061	+	3.56882	NA	intron (ENSMUST00000189728.6, intron 4 of 4)	protein_coding-intron (ENSMUST00000112905.3, intron 5 of 5)	9024	ENSMUST00000187445.1	ENSMUSG00000026279	ENSMUST00000190116			Thap4			protein_coding
e11ve16_cond1_726	chr1	93755256	93755477	+	3.69622	NA	promoter-TSS (ENSMUST00000112905.3)	protein_coding-promoter-TSS (ENSMUST00000112905.3)	204	ENSMUST00000189152.1	ENSMUSG00000026280	ENSMUST00000186124			Atg4b			protein_coding
e11ve16_cond1_727	chr1	93845897	93846138	+	4.92896	NA	intron (ENSMUST00000097633.9, intron 8 of 9)	protein_coding-intron (ENSMUST00000097633.9, intron 8 of 9)	-15289	ENSMUST00000190710.1	ENSMUSG00000094651	ENSMUST00000094663			Gal3st2			protein_coding
e11ve16_cond1_728	chr1	93880010	93880244	+	6.21029	NA	Intergenic	Intergenic	18301	ENSMUST00000187896.1	ENSMUSG00000094651	ENSMUST00000094663			Gal3st2			protein_coding
e11ve16_cond1_729	chr1	93947481	93947941	+	4.5927	NA	Intergenic	Intergenic	19674	ENSMUST00000177958.1	ENSMUSG00000093805	ENSMUST00000177958			Gal3st2b			protein_coding
e11ve16_cond1_730	chr1	93980842	93981099	+	6.51742	NA	intron (ENSMUST00000185591.1, intron 4 of 5)	unprocessed_pseudogene-intron (ENSMUST00000185591.1, intron 4 of 5)	5617	ENSMUST00000185591.1	ENSMUSG00000099624	ENSMUST00000185591			Gm7889			unprocessed_pseudogene
e11ve16_cond1_731	chr1	94426314	94427084	+	8.86837	NA	Intergenic	Intergenic	43188	ENSMUST00000187459.1	ENSMUSG00000100347	ENSMUST00000187459			Gm7895			processed_pseudogene
e11ve16_cond1_732	chr1	94971679	94973049	+	8.20681	NA	Intergenic	Intergenic	67679	ENSMUST00000158685.1	ENSMUSG00000089310	ENSMUST00000158685			Gm23181			snoRNA
e11ve16_cond1_733	chr1	95029046	95029395	+	3.84659	NA	Intergenic	Intergenic	10823	ENSMUST00000158685.1	ENSMUSG00000089310	ENSMUST00000158685			Gm23181			snoRNA
e11ve16_cond1_734	chr1	95666805	95667111	+	5.04541	NA	exon (ENSMUST00000186853.1, exon 1 of 1)	protein_coding-exon (ENSMUST00000186853.1, exon 1 of 1)	577	ENSMUST00000189556.1	ENSMUSG00000040710	ENSMUST00000189556			St8sia4			protein_coding
e11ve16_cond1_735	chr1	97698813	97699156	+	4.08068	NA	Intergenic	Intergenic	16165	ENSMUST00000137758.1	ENSMUSG00000040648	ENSMUST00000171129			Ppip5k2			protein_coding
e11ve16_cond1_736	chr1	97727417	97727782	+	4.76639	NA	intron (ENSMUST00000171129.7, intron 20 of 26)	protein_coding-intron (ENSMUST00000042509.12, intron 21 of 27)	-6292	ENSMUST00000189992.1	ENSMUSG00000040648	ENSMUST00000171129			Ppip5k2			protein_coding
e11ve16_cond1_737	chr1	97919500	97919713	+	4.63551	NA	intron (ENSMUST00000097625.9, intron 7 of 25)	protein_coding-intron (ENSMUST00000058762.14, intron 7 of 25)	-16794	ENSMUST00000158544.1	ENSMUSG00000089169	ENSMUST00000158544			Gm25413			misc_RNA
e11ve16_cond1_738	chr1	98047576	98048406	+	10.2561	NA	promoter-TSS (ENSMUST00000159324.7)	lncRNA-promoter-TSS (ENSMUST00000159324.7)	-198	ENSMUST00000161661.1	ENSMUSG00000089706	ENSMUST00000160588			B230216N24Rik			lncRNA
e11ve16_cond1_739	chr1	99201368	99202374	+	19.6412	NA	Intergenic	Intergenic	184507	ENSMUST00000157179.1	ENSMUSG00000087804	ENSMUST00000157179			Gm23434			snRNA
e11ve16_cond1_740	chr1	99771965	99772665	+	8.90704	NA	promoter-TSS (ENSMUST00000086738.9)	protein_coding-promoter-TSS (ENSMUST00000086738.9)	-450	ENSMUST00000086738.9	ENSMUSG00000067028	ENSMUST00000188735			Cntnap5b			protein_coding
e11ve16_cond1_741	chr1	100231275	100231508	+	3.76344	NA	intron (ENSMUST00000086738.9, intron 11 of 23)	protein_coding-intron (ENSMUST00000086738.9, intron 11 of 23)	-21238	ENSMUST00000185484.1	ENSMUSG00000067028	ENSMUST00000188735			Cntnap5b			protein_coding
e11ve16_cond1_742	chr1	100332869	100333208	+	5.82416	NA	intron (ENSMUST00000086738.9, intron 13 of 23)	protein_coding-intron (ENSMUST00000086738.9, intron 13 of 23)	50247	ENSMUST00000190817.1	ENSMUSG00000100794	ENSMUST00000190817			Gm29667			processed_pseudogene
e11ve16_cond1_743	chr1	100805819	100806028	+	3.81588	NA	Intergenic	Intergenic	-55870	ENSMUST00000103851.1	ENSMUSG00000077039	ENSMUST00000103851			Gm25537			miRNA
e11ve16_cond1_744	chr1	101929051	101929608	+	4.08783	NA	Intergenic	Intergenic	-34238	ENSMUST00000186885.1	ENSMUSG00000099375	ENSMUST00000186885			Gm28187			lncRNA
e11ve16_cond1_745	chr1	103231193	103231615	+	5.83348	NA	intron (ENSMUST00000186155.1, intron 3 of 4)	unprocessed_pseudogene-intron (ENSMUST00000186155.1, intron 3 of 4)	5363	ENSMUST00000157969.1	ENSMUSG00000088594	ENSMUST00000157969			Gm23965			snoRNA
e11ve16_cond1_746	chr1	104802810	104803642	+	4.1005	NA	intron (ENSMUST00000062528.8, intron 1 of 11)	protein_coding-intron (ENSMUST00000062528.8, intron 1 of 11)	27112	ENSMUST00000191819.1	ENSMUSG00000103991	ENSMUST00000191819			Gm38031			TEC
e11ve16_cond1_747	chr1	104932536	104933529	+	8.27978	NA	intron (ENSMUST00000062528.8, intron 1 of 11)	protein_coding-intron (ENSMUST00000062528.8, intron 1 of 11)	-20699	ENSMUST00000159213.1	ENSMUSG00000089866	ENSMUST00000159213			Gm15699			lncRNA
e11ve16_cond1_748	chr1	104944534	104945204	+	5.68703	NA	intron (ENSMUST00000062528.8, intron 4 of 11)	protein_coding-intron (ENSMUST00000062528.8, intron 4 of 11)	-32536	ENSMUST00000159213.1	ENSMUSG00000089866	ENSMUST00000159213			Gm15699			lncRNA
e11ve16_cond1_749	chr1	105038776	105039069	+	8.24712	NA	Intergenic	Intergenic	-77532	ENSMUST00000187882.1	ENSMUSG00000099669	ENSMUST00000187882			Gm29012			lncRNA
e11ve16_cond1_750	chr1	105118210	105119164	+	8.41691	NA	intron (ENSMUST00000187882.1, intron 1 of 2)	lncRNA-intron (ENSMUST00000187882.1, intron 1 of 2)	2233	ENSMUST00000187882.1	ENSMUSG00000099669	ENSMUST00000187882			Gm29012			lncRNA
e11ve16_cond1_751	chr1	105426785	105427059	+	6.56173	NA	intron (ENSMUST00000188743.1, intron 1 of 5)	lncRNA-intron (ENSMUST00000188743.1, intron 1 of 5)	-29049	ENSMUST00000086725.5	ENSMUSG00000067017	ENSMUST00000086725			Gm3608			pseudogene
e11ve16_cond1_752	chr1	105664135	105664552	+	3.66815	NA	promoter-TSS (ENSMUST00000185209.1)	protein_coding-promoter-TSS (ENSMUST00000185209.1)	-98	ENSMUST00000191293.6	ENSMUSG00000026319	ENSMUST00000190459			Relch			protein_coding
e11ve16_cond1_753	chr1	105670826	105671082	+	9.01943	NA	intron (ENSMUST00000086721.9, intron 1 of 28)	protein_coding-intron (ENSMUST00000039173.12, intron 1 of 28)	6513	ENSMUST00000191293.6	ENSMUSG00000026319	ENSMUST00000190459			Relch			protein_coding
e11ve16_cond1_754	chr1	105802878	105803802	+	5.50818	NA	intron (ENSMUST00000187812.1, intron 1 of 3)	protein_coding-intron (ENSMUST00000027559.7, intron 1 of 9)	-16530	ENSMUST00000187658.1	ENSMUSG00000026321	ENSMUST00000187658			Tnfrsf11a			protein_coding
e11ve16_cond1_755	chr1	105818148	105818471	+	6.57253	NA	intron (ENSMUST00000027559.7, intron 5 of 9)	protein_coding-intron (ENSMUST00000027559.7, intron 5 of 9)	-1561	ENSMUST00000187658.1	ENSMUSG00000026321	ENSMUST00000187658			Tnfrsf11a			protein_coding
e11ve16_cond1_756	chr1	105842942	105844838	+	12.7899	NA	intron (ENSMUST00000027559.7, intron 9 of 9)	protein_coding-intron (ENSMUST00000027559.7, intron 9 of 9)	24020	ENSMUST00000187658.1	ENSMUSG00000026321	ENSMUST00000187658			Tnfrsf11a			protein_coding
e11ve16_cond1_757	chr1	105879733	105880724	+	7.90098	NA	Intergenic	Intergenic	10784	ENSMUST00000194221.1	ENSMUSG00000102690	ENSMUST00000194221			Gm37779			TEC
e11ve16_cond1_758	chr1	105911762	105912099	+	4.38658	NA	Intergenic	Intergenic	-20918	ENSMUST00000194221.1	ENSMUSG00000102690	ENSMUST00000194221			Gm37779			TEC
e11ve16_cond1_759	chr1	105990671	105991202	+	55.9726	NA	promoter-TSS (ENSMUST00000185535.1)	lncRNA-promoter-TSS (ENSMUST00000185535.1)	247	ENSMUST00000119166.7	ENSMUSG00000038866	ENSMUST00000188954			Zcchc2			protein_coding
e11ve16_cond1_760	chr1	106071697	106072304	+	5.30768	NA	TTS (ENSMUST00000193577.1)	TEC-TTS (ENSMUST00000193577.1)	3894	ENSMUST00000193577.1	ENSMUSG00000102501	ENSMUST00000193577			Gm37372			TEC
e11ve16_cond1_761	chr1	106171950	106172519	+	14.0576	NA	promoter-TSS (ENSMUST00000190105.1)	lncRNA-promoter-TSS (ENSMUST00000190105.1)	482	ENSMUST00000061047.6	ENSMUSG00000044340	ENSMUST00000061047			Phlpp1			protein_coding
e11ve16_cond1_762	chr1	106379995	106380906	+	5.15138	NA	intron (ENSMUST00000061047.6, intron 14 of 16)	protein_coding-intron (ENSMUST00000061047.6, intron 14 of 16)	21537	ENSMUST00000187918.1	ENSMUSG00000100247	ENSMUST00000187918			A530053M12Rik			lncRNA
e11ve16_cond1_763	chr1	106591560	106591995	+	5.94015	NA	intron (ENSMUST00000112751.1, intron 1 of 1)	protein_coding-intron (ENSMUST00000112751.1, intron 1 of 1)	15093	ENSMUST00000192399.1	ENSMUSG00000103348	ENSMUST00000192399			Gm37053			TEC
e11ve16_cond1_764	chr1	106603383	106603800	+	5.69183	NA	intron (ENSMUST00000112751.1, intron 1 of 1)	protein_coding-intron (ENSMUST00000112751.1, intron 1 of 1)	3279	ENSMUST00000192399.1	ENSMUSG00000103348	ENSMUST00000192399			Gm37053			TEC
e11ve16_cond1_765	chr1	106608574	106609153	+	4.28712	NA	intron (ENSMUST00000112751.1, intron 1 of 1)	protein_coding-intron (ENSMUST00000112751.1, intron 1 of 1)	-1993	ENSMUST00000192399.1	ENSMUSG00000103348	ENSMUST00000192399			Gm37053			TEC
e11ve16_cond1_766	chr1	106628949	106629163	+	3.50449	NA	intron (ENSMUST00000112751.1, intron 1 of 1)	protein_coding-intron (ENSMUST00000112751.1, intron 1 of 1)	-22186	ENSMUST00000192399.1	ENSMUSG00000103348	ENSMUST00000192399			Gm37053			TEC
e11ve16_cond1_767	chr1	106712616	106712855	+	5.27616	NA	exon (ENSMUST00000112751.1, exon 1 of 2)	protein_coding-exon (ENSMUST00000112751.1, exon 1 of 2)	444	ENSMUST00000189999.1	ENSMUSG00000057329	ENSMUST00000112751			Bcl2			protein_coding
e11ve16_cond1_768	chr1	106713156	106713583	+	4.17901	NA	promoter-TSS (ENSMUST00000189999.1)	protein_coding-promoter-TSS (ENSMUST00000189999.1)	-190	ENSMUST00000189999.1	ENSMUSG00000057329	ENSMUST00000112751			Bcl2			protein_coding
e11ve16_cond1_769	chr1	107350830	107351209	+	4.66999	NA	Intergenic	Intergenic	-10179	ENSMUST00000191425.6	ENSMUSG00000026327	ENSMUST00000191425			Serpinb11			protein_coding
e11ve16_cond1_770	chr1	107774666	107775333	+	6.73342	NA	Intergenic	Intergenic	-18291	ENSMUST00000179841.1	ENSMUSG00000096241	ENSMUST00000179841			Gm24267			snRNA
e11ve16_cond1_771	chr1	107860875	107861318	+	4.05551	NA	Intergenic	Intergenic	-31878	ENSMUST00000104049.1	ENSMUSG00000077237	ENSMUST00000104049			Gm22438			snoRNA
e11ve16_cond1_772	chr1	107942205	107942696	+	3.77688	NA	intron (ENSMUST00000186875.6, intron 4 of 4)	lncRNA-intron (ENSMUST00000186875.6, intron 4 of 4)	5741	ENSMUST00000189497.1	ENSMUSG00000100457	ENSMUST00000186875			D830032E09Rik			lncRNA
e11ve16_cond1_773	chr1	108182265	108183075	+	7.71175	NA	Intergenic	Intergenic	196768	ENSMUST00000185629.1	ENSMUSG00000100041	ENSMUST00000185629			Gm5702			processed_pseudogene
e11ve16_cond1_774	chr1	109972132	109972846	+	5.04952	NA	Intergenic	Intergenic	-9942	ENSMUST00000137092.7	ENSMUSG00000026312	ENSMUST00000145188			Cdh7			protein_coding
e11ve16_cond1_775	chr1	109981954	109983526	+	16.3197	NA	promoter-TSS (ENSMUST00000112701.7)	protein_coding-promoter-TSS (ENSMUST00000112701.7)	30	ENSMUST00000112701.7	ENSMUSG00000026312	ENSMUST00000145188			Cdh7			protein_coding
e11ve16_cond1_776	chr1	110195074	110195794	+	7.92715	NA	Intergenic	Intergenic	96139	ENSMUST00000134301.1	ENSMUSG00000026312	ENSMUST00000145188			Cdh7			protein_coding
e11ve16_cond1_777	chr1	110590141	110591050	+	9.28453	NA	Intergenic	Intergenic	-9426	ENSMUST00000189583.1	ENSMUSG00000099926	ENSMUST00000189583			Gm6693			processed_pseudogene
e11ve16_cond1_778	chr1	111754407	111754729	+	5.0441	NA	Intergenic	Intergenic	53207	ENSMUST00000186797.1	ENSMUSG00000100555	ENSMUST00000186797			Gm8173			processed_pseudogene
e11ve16_cond1_779	chr1	112416155	112416927	+	6.29789	NA	Intergenic	Intergenic	-11686	ENSMUST00000185872.1	ENSMUSG00000101054	ENSMUST00000185872			Gm18406			processed_pseudogene
e11ve16_cond1_780	chr1	115134373	115134598	+	4.65964	NA	Intergenic	Intergenic	85278	ENSMUST00000185902.1	ENSMUSG00000101687	ENSMUST00000185902			Gm4854			processed_pseudogene
e11ve16_cond1_781	chr1	115671346	115671784	+	3.62295	NA	promoter-TSS (ENSMUST00000187634.1)	transcribed_processed_pseudogene-promoter-TSS (ENSMUST00000187634.1)	-976	ENSMUST00000187634.1	ENSMUSG00000100515	ENSMUST00000187634			Gm17916			transcribed_processed_pseudogene
e11ve16_cond1_782	chr1	115864710	115865184	+	5.63855	NA	intron (ENSMUST00000043725.8, intron 1 of 23)	protein_coding-intron (ENSMUST00000043725.8, intron 1 of 23)	180191	ENSMUST00000043725.8	ENSMUSG00000070695	ENSMUST00000043725			Cntnap5a			protein_coding
e11ve16_cond1_783	chr1	115930787	115931928	+	6.55243	NA	intron (ENSMUST00000043725.8, intron 3 of 23)	protein_coding-intron (ENSMUST00000043725.8, intron 3 of 23)	246601	ENSMUST00000043725.8	ENSMUSG00000070695	ENSMUST00000043725			Cntnap5a			protein_coding
e11ve16_cond1_784	chr1	116090708	116091101	+	5.88921	NA	intron (ENSMUST00000043725.8, intron 5 of 23)	protein_coding-intron (ENSMUST00000043725.8, intron 5 of 23)	303509	ENSMUST00000175207.1	ENSMUSG00000092948	ENSMUST00000175207			Gm23393			miRNA
e11ve16_cond1_785	chr1	116099110	116099682	+	5.75455	NA	intron (ENSMUST00000043725.8, intron 5 of 23)	protein_coding-intron (ENSMUST00000043725.8, intron 5 of 23)	295017	ENSMUST00000175207.1	ENSMUSG00000092948	ENSMUST00000175207			Gm23393			miRNA
e11ve16_cond1_786	chr1	118322029	118322251	+	3.32513	NA	promoter-TSS (ENSMUST00000161495.1)	protein_coding-promoter-TSS (ENSMUST00000161495.1)	-12	ENSMUST00000161495.1	ENSMUSG00000026377	ENSMUST00000161495			Nifk			protein_coding
e11ve16_cond1_787	chr1	118389483	118389727	+	4.95823	NA	promoter-TSS (ENSMUST00000189262.6)	protein_coding-promoter-TSS (ENSMUST00000189262.6)	88	ENSMUST00000189262.6	ENSMUSG00000064302	ENSMUST00000191445			Clasp1			protein_coding
e11ve16_cond1_788	chr1	118389926	118390265	+	3.80706	NA	intron (ENSMUST00000049404.12, intron 1 of 39)	protein_coding-intron (ENSMUST00000049404.12, intron 1 of 39)	578	ENSMUST00000189262.6	ENSMUSG00000064302	ENSMUST00000191445			Clasp1			protein_coding
e11ve16_cond1_789	chr1	118466432	118466659	+	4.35967	NA	intron (ENSMUST00000178710.7, intron 6 of 36)	protein_coding-intron (ENSMUST00000049404.12, intron 6 of 39)	-3226	ENSMUST00000203646.2	ENSMUSG00000064302	ENSMUST00000191445			Clasp1			protein_coding
e11ve16_cond1_790	chr1	118480677	118480967	+	3.75989	NA	intron (ENSMUST00000165223.7, intron 8 of 36)	protein_coding-intron (ENSMUST00000186349.6, intron 7 of 38)	-1217	ENSMUST00000191823.5	ENSMUSG00000064302	ENSMUST00000191445			Clasp1			protein_coding
e11ve16_cond1_791	chr1	118482042	118482917	+	4.65095	NA	intron (ENSMUST00000191823.5, intron 1 of 32)	protein_coding-intron (ENSMUST00000191823.5, intron 1 of 32)	440	ENSMUST00000191823.5	ENSMUSG00000064302	ENSMUST00000191445			Clasp1			protein_coding
e11ve16_cond1_792	chr1	118840128	118840737	+	4.1878	NA	exon (ENSMUST00000062483.14, exon 13 of 14)	protein_coding-exon (ENSMUST00000062483.14, exon 13 of 14)	30296	ENSMUST00000190981.1	ENSMUSG00000100040	ENSMUST00000190981			Gm28467			processed_pseudogene
e11ve16_cond1_793	chr1	118878132	118878749	+	4.11033	NA	intron (ENSMUST00000160991.7, intron 2 of 7)	protein_coding-intron (ENSMUST00000062483.14, intron 3 of 13)	68304	ENSMUST00000190981.1	ENSMUSG00000100040	ENSMUST00000190981			Gm28467			processed_pseudogene
e11ve16_cond1_794	chr1	118914320	118914519	+	13.2692	NA	intron (ENSMUST00000159839.7, intron 2 of 6)	protein_coding-intron (ENSMUST00000062483.14, intron 2 of 13)	-39801	ENSMUST00000183982.1	ENSMUSG00000098273	ENSMUST00000183982			Mir6346			miRNA
e11ve16_cond1_795	chr1	119053738	119054059	+	3.51161	NA	promoter-TSS (ENSMUST00000062483.14)	protein_coding-promoter-TSS (ENSMUST00000062483.14)	-279	ENSMUST00000062483.14	ENSMUSG00000048402	ENSMUST00000161451			Gli2			protein_coding
e11ve16_cond1_796	chr1	119196649	119197564	+	7.53731	NA	Intergenic	Intergenic	39520	ENSMUST00000181691.1	ENSMUSG00000096939	ENSMUST00000181691			Gm8321			processed_pseudogene
e11ve16_cond1_797	chr1	119217083	119217845	+	7.60684	NA	Intergenic	Intergenic	25289	ENSMUST00000186012.1	ENSMUSG00000100767	ENSMUST00000186012			Gm3508			processed_pseudogene
e11ve16_cond1_798	chr1	119243882	119244153	+	5.27779	NA	Intergenic	Intergenic	-1264	ENSMUST00000186012.1	ENSMUSG00000100767	ENSMUST00000186012			Gm3508			processed_pseudogene
e11ve16_cond1_799	chr1	119304124	119306300	+	15.0884	NA	TTS (ENSMUST00000189894.1)	lncRNA-TTS (ENSMUST00000189894.1)	21621	ENSMUST00000189894.1	ENSMUSG00000099860	ENSMUST00000189894			Gm29456			lncRNA
e11ve16_cond1_800	chr1	119388889	119389549	+	6.23206	NA	Intergenic	Intergenic	33029	ENSMUST00000038765.5	ENSMUSG00000037035	ENSMUST00000038765			Inhbb			protein_coding
e11ve16_cond1_801	chr1	119471679	119471890	+	5.64568	NA	TTS (ENSMUST00000142945.2)	protein_coding-TTS (ENSMUST00000142945.2)	6295	ENSMUST00000142945.2	ENSMUSG00000004451	ENSMUST00000142945			Ralb			protein_coding
e11ve16_cond1_802	chr1	119536023	119536381	+	4.74798	NA	promoter-TSS (ENSMUST00000186206.1)	lncRNA-promoter-TSS (ENSMUST00000186206.1)	-37	ENSMUST00000188909.1	ENSMUSG00000101731	ENSMUST00000188909			3830432H09Rik			lncRNA
e11ve16_cond1_803	chr1	119626670	119627499	+	4.18741	NA	intron (ENSMUST00000027632.13, intron 3 of 16)	protein_coding-intron (ENSMUST00000027632.13, intron 3 of 16)	4585	ENSMUST00000192036.1	ENSMUSG00000102687	ENSMUST00000192036			Gm37219			TEC
e11ve16_cond1_804	chr1	119675168	119675643	+	3.60288	NA	intron (ENSMUST00000166624.1, intron 6 of 7)	protein_coding-intron (ENSMUST00000064091.11, intron 25 of 26)	12232	ENSMUST00000166624.1	ENSMUSG00000026384	ENSMUST00000163435			Ptpn4			protein_coding
e11ve16_cond1_805	chr1	119997593	119997964	+	3.53268	NA	promoter-TSS (ENSMUST00000174370.7)	protein_coding-promoter-TSS (ENSMUST00000174370.7)	-544	ENSMUST00000174458.1	ENSMUSG00000036962	ENSMUST00000037840			Cfap221			protein_coding
e11ve16_cond1_806	chr1	120007010	120007524	+	7.22049	NA	exon (ENSMUST00000072886.10, exon 1 of 14)	protein_coding-exon (ENSMUST00000072886.10, exon 1 of 14)	233	ENSMUST00000189037.1	ENSMUSG00000026387	ENSMUST00000072886			Sctr			protein_coding
e11ve16_cond1_807	chr1	120012630	120013055	+	3.5559	NA	intron (ENSMUST00000189037.1, intron 1 of 12)	protein_coding-intron (ENSMUST00000072886.10, intron 1 of 13)	5808	ENSMUST00000189037.1	ENSMUSG00000026387	ENSMUST00000072886			Sctr			protein_coding
e11ve16_cond1_808	chr1	120073981	120074498	+	6.25199	NA	promoter-TSS (ENSMUST00000056089.7)	protein_coding-promoter-TSS (ENSMUST00000056089.7)	-165	ENSMUST00000056089.7	ENSMUSG00000050777	ENSMUST00000056089			Tmem37			protein_coding
e11ve16_cond1_809	chr1	120089311	120089531	+	5.48597	NA	Intergenic	Intergenic	-15347	ENSMUST00000056089.7	ENSMUSG00000050777	ENSMUST00000056089			Tmem37			protein_coding
e11ve16_cond1_810	chr1	120195861	120196204	+	5.32357	NA	intron (ENSMUST00000140490.7, intron 4 of 4)	protein_coding-intron (ENSMUST00000140490.7, intron 4 of 4)	35552	ENSMUST00000128578.1	ENSMUSG00000026388	ENSMUST00000027637			3110009E18Rik			protein_coding
e11ve16_cond1_811	chr1	120341283	120341814	+	3.72255	NA	exon (ENSMUST00000037286.9, exon 1 of 2)	protein_coding-exon (ENSMUST00000037286.9, exon 1 of 2)	966	ENSMUST00000037286.9	ENSMUSG00000036907	ENSMUST00000037286			C1ql2			protein_coding
e11ve16_cond1_812	chr1	120480794	120481276	+	4.29654	NA	intron (ENSMUST00000027639.7, intron 12 of 16)	protein_coding-intron (ENSMUST00000027639.7, intron 12 of 16)	23721	ENSMUST00000186432.2	ENSMUSG00000026390	ENSMUST00000027639			Marco			protein_coding
e11ve16_cond1_813	chr1	120596177	120596552	+	4.84136	NA	Intergenic	Intergenic	-6054	ENSMUST00000079721.8	ENSMUSG00000058665	ENSMUST00000079721			En1			protein_coding
e11ve16_cond1_814	chr1	120602314	120604091	+	7.21418	NA	exon (ENSMUST00000079721.8, exon 1 of 2)	protein_coding-exon (ENSMUST00000079721.8, exon 1 of 2)	784	ENSMUST00000079721.8	ENSMUSG00000058665	ENSMUST00000079721			En1			protein_coding
e11ve16_cond1_815	chr1	120643021	120644150	+	5.09271	NA	intron (ENSMUST00000186982.2, intron 1 of 6)	lncRNA-intron (ENSMUST00000186982.2, intron 1 of 6)	21845	ENSMUST00000186982.2	ENSMUSG00000099957	ENSMUST00000186982			2610027F03Rik			lncRNA
e11ve16_cond1_816	chr1	120801495	120802476	+	9.32956	NA	Intergenic	Intergenic	-14515	ENSMUST00000189213.1	ENSMUSG00000101922	ENSMUST00000189213			Gm29345			lncRNA
e11ve16_cond1_817	chr1	120838461	120839039	+	4.52576	NA	Intergenic	Intergenic	-13294	ENSMUST00000068143.8	ENSMUSG00000100761	ENSMUST00000068143			Gm29344			processed_pseudogene
e11ve16_cond1_818	chr1	120961919	120962492	+	8.48205	NA	Intergenic	Intergenic	93209	ENSMUST00000194609.1	ENSMUSG00000102360	ENSMUST00000194609			Gm37043			TEC
e11ve16_cond1_819	chr1	120963749	120964217	+	5.78801	NA	Intergenic	Intergenic	94987	ENSMUST00000194609.1	ENSMUSG00000102360	ENSMUST00000194609			Gm37043			TEC
e11ve16_cond1_820	chr1	121096727	121097100	+	4.36692	NA	intron (ENSMUST00000185678.1, intron 1 of 2)	lncRNA-intron (ENSMUST00000181433.7, intron 1 of 4)	9384	ENSMUST00000181183.2	ENSMUSG00000097881	ENSMUST00000181433			Celrr			lncRNA
e11ve16_cond1_821	chr1	121177480	121179015	+	7.90978	NA	exon (ENSMUST00000185678.1, exon 3 of 3)	lncRNA-exon (ENSMUST00000185678.1, exon 3 of 3)	-46029	ENSMUST00000191007.1	ENSMUSG00000101700	ENSMUST00000191007			Gm29359			lncRNA
e11ve16_cond1_822	chr1	121180002	121180481	+	4.53572	NA	Intergenic	Intergenic	-44035	ENSMUST00000191007.1	ENSMUSG00000101700	ENSMUST00000191007			Gm29359			lncRNA
e11ve16_cond1_823	chr1	121527266	121528720	+	12.3684	NA	exon (ENSMUST00000055884.7, exon 1 of 2)	protein_coding-exon (ENSMUST00000055884.7, exon 1 of 2)	472	ENSMUST00000055884.7	ENSMUSG00000050534	ENSMUST00000055884			Htr5b			protein_coding
e11ve16_cond1_824	chr1	122109774	122110321	+	4.25533	NA	Intergenic	Intergenic	-80174	ENSMUST00000185647.1	ENSMUSG00000100913	ENSMUST00000185647			Gm8392			processed_pseudogene
e11ve16_cond1_825	chr1	123068544	123069540	+	6.17194	NA	Intergenic	Intergenic	80175	ENSMUST00000189712.1	ENSMUSG00000100762	ENSMUST00000189712			Gm8403			processed_pseudogene
e11ve16_cond1_826	chr1	123303810	123304262	+	6.51492	NA	Intergenic	Intergenic	16462	ENSMUST00000189001.1	ENSMUSG00000101495	ENSMUST00000189001			Gm28912			processed_pseudogene
e11ve16_cond1_827	chr1	124002899	124003235	+	7.55548	NA	intron (ENSMUST00000239072.1, intron 1 of 25)	protein_coding-intron (ENSMUST00000112603.3, intron 1 of 25)	42096	ENSMUST00000112603.3	ENSMUSG00000036815	ENSMUST00000112603			Dpp10			protein_coding
e11ve16_cond1_828	chr1	124044770	124046544	+	20.9641	NA	promoter-TSS (ENSMUST00000112603.3)	protein_coding-promoter-TSS (ENSMUST00000112603.3)	-98	ENSMUST00000112606.7	ENSMUSG00000036815	ENSMUST00000112603			Dpp10			protein_coding
e11ve16_cond1_829	chr1	125119016	125119466	+	5.87451	NA	Intergenic	Intergenic	78214	ENSMUST00000187796.1	ENSMUSG00000099574	ENSMUST00000187796			1700121L03Rik			lncRNA
e11ve16_cond1_830	chr1	125273010	125273700	+	4.62404	NA	Intergenic	Intergenic	-75900	ENSMUST00000187796.1	ENSMUSG00000099574	ENSMUST00000187796			1700121L03Rik			lncRNA
e11ve16_cond1_831	chr1	125339202	125339634	+	3.87781	NA	Intergenic	Intergenic	58194	ENSMUST00000186008.6	ENSMUSG00000026341	ENSMUST00000188497			Actr3			protein_coding
e11ve16_cond1_832	chr1	125370728	125370943	+	3.42249	NA	Intergenic	Intergenic	26777	ENSMUST00000186008.6	ENSMUSG00000026341	ENSMUST00000188497			Actr3			protein_coding
e11ve16_cond1_833	chr1	125476270	125476522	+	3.8467	NA	Intergenic	Intergenic	31829	ENSMUST00000186830.1	ENSMUSG00000102063	ENSMUST00000186830			Gm28706			lncRNA
e11ve16_cond1_834	chr1	125476642	125476930	+	4.57155	NA	Intergenic	Intergenic	32219	ENSMUST00000186830.1	ENSMUSG00000102063	ENSMUST00000186830			Gm28706			lncRNA
e11ve16_cond1_835	chr1	125477058	125477272	+	7.10991	NA	Intergenic	Intergenic	32598	ENSMUST00000186830.1	ENSMUSG00000102063	ENSMUST00000186830			Gm28706			lncRNA
e11ve16_cond1_836	chr1	125481666	125482744	+	5.82689	NA	Intergenic	Intergenic	37638	ENSMUST00000186830.1	ENSMUSG00000102063	ENSMUST00000186830			Gm28706			lncRNA
e11ve16_cond1_837	chr1	125489601	125489929	+	4.85225	NA	Intergenic	Intergenic	45198	ENSMUST00000186830.1	ENSMUSG00000102063	ENSMUST00000186830			Gm28706			lncRNA
e11ve16_cond1_838	chr1	125508280	125508841	+	4.12017	NA	Intergenic	Intergenic	-52035	ENSMUST00000190037.6	ENSMUSG00000026342	ENSMUST00000190037			Slc35f5			protein_coding
e11ve16_cond1_839	chr1	125550777	125551103	+	3.16981	NA	Intergenic	Intergenic	-9655	ENSMUST00000190037.6	ENSMUSG00000026342	ENSMUST00000190037			Slc35f5			protein_coding
e11ve16_cond1_840	chr1	125606965	125607370	+	4.95503	NA	Intergenic	Intergenic	22654	ENSMUST00000189443.1	ENSMUSG00000026342	ENSMUST00000190037			Slc35f5			protein_coding
e11ve16_cond1_841	chr1	125668501	125669428	+	9.26337	NA	promoter-TSS (ENSMUST00000191239.1)	processed_pseudogene-promoter-TSS (ENSMUST00000191239.1)	-348	ENSMUST00000191239.1	ENSMUSG00000101015	ENSMUST00000191239			Gm18444			processed_pseudogene
e11ve16_cond1_842	chr1	125737384	125737588	+	5.99955	NA	intron (ENSMUST00000027581.6, intron 1 of 1)	protein_coding-intron (ENSMUST00000027581.6, intron 1 of 1)	60491	ENSMUST00000027581.6	ENSMUSG00000026343	ENSMUST00000159359			Gpr39			protein_coding
e11ve16_cond1_843	chr1	125910715	125911984	+	14.6057	NA	promoter-TSS (ENSMUST00000159529.1)	protein_coding-promoter-TSS (ENSMUST00000159529.1)	38	ENSMUST00000162899.7	ENSMUSG00000026344	ENSMUST00000027582			Lypd1			protein_coding
e11ve16_cond1_844	chr1	126253809	126254636	+	6.10723	NA	intron (ENSMUST00000161954.7, intron 4 of 14)	protein_coding-intron (ENSMUST00000057846.14, intron 3 of 12)	70452	ENSMUST00000192213.1	ENSMUSG00000103824	ENSMUST00000192213			Gm38177			TEC
e11ve16_cond1_845	chr1	126473392	126473591	+	3.3431	NA	intron (ENSMUST00000162646.7, intron 3 of 6)	protein_coding-intron (ENSMUST00000094609.9, intron 3 of 12)	19251	ENSMUST00000162877.7	ENSMUSG00000049690	ENSMUST00000094610			Nckap5			protein_coding
e11ve16_cond1_846	chr1	126492100	126493008	+	5.71233	NA	exon (ENSMUST00000161954.7, exon 1 of 15)	protein_coding-exon (ENSMUST00000161954.7, exon 1 of 15)	188	ENSMUST00000162877.7	ENSMUSG00000049690	ENSMUST00000094610			Nckap5			protein_coding
e11ve16_cond1_847	chr1	126675551	126675961	+	4.48163	NA	intron (ENSMUST00000162647.1, intron 2 of 2)	protein_coding-intron (ENSMUST00000094609.9, intron 2 of 12)	62434	ENSMUST00000162664.7	ENSMUSG00000049690	ENSMUST00000094610			Nckap5			protein_coding
e11ve16_cond1_848	chr1	126676607	126676957	+	4.41912	NA	intron (ENSMUST00000162647.1, intron 2 of 2)	protein_coding-intron (ENSMUST00000094609.9, intron 2 of 12)	61408	ENSMUST00000162664.7	ENSMUSG00000049690	ENSMUST00000094610			Nckap5			protein_coding
e11ve16_cond1_849	chr1	126737460	126738999	+	9.61339	NA	promoter-TSS (ENSMUST00000160693.1)	protein_coding-promoter-TSS (ENSMUST00000160693.1)	-27	ENSMUST00000160693.1	ENSMUSG00000049690	ENSMUST00000094610			Nckap5			protein_coding
e11ve16_cond1_850	chr1	126752553	126753072	+	4.1354	NA	intron (ENSMUST00000112583.7, intron 1 of 16)	protein_coding-intron (ENSMUST00000094609.9, intron 1 of 12)	-14610	ENSMUST00000160693.1	ENSMUSG00000049690	ENSMUST00000094610			Nckap5			protein_coding
e11ve16_cond1_851	chr1	126779301	126779695	+	10.2302	NA	intron (ENSMUST00000112583.7, intron 1 of 16)	protein_coding-intron (ENSMUST00000094609.9, intron 1 of 12)	-41296	ENSMUST00000160693.1	ENSMUSG00000049690	ENSMUST00000094610			Nckap5			protein_coding
e11ve16_cond1_852	chr1	126833308	126833592	+	3.36888	NA	Intergenic	Intergenic	-2651	ENSMUST00000162646.7	ENSMUSG00000049690	ENSMUST00000094610			Nckap5			protein_coding
e11ve16_cond1_853	chr1	126931965	126932451	+	4.45828	NA	Intergenic	Intergenic	-55593	ENSMUST00000188266.1	ENSMUSG00000101600	ENSMUST00000188266			4930599A14Rik			lncRNA
e11ve16_cond1_854	chr1	126993039	126993447	+	5.59141	NA	Intergenic	Intergenic	57453	ENSMUST00000185860.1	ENSMUSG00000101385	ENSMUST00000185860			Gm5261			processed_pseudogene
e11ve16_cond1_855	chr1	127002981	127003198	+	4.15887	NA	Intergenic	Intergenic	47607	ENSMUST00000185860.1	ENSMUSG00000101385	ENSMUST00000185860			Gm5261			processed_pseudogene
e11ve16_cond1_856	chr1	127103102	127103505	+	5.49806	NA	Intergenic	Intergenic	-52607	ENSMUST00000185860.1	ENSMUSG00000101385	ENSMUST00000185860			Gm5261			processed_pseudogene
e11ve16_cond1_857	chr1	127131579	127132572	+	9.7427	NA	Intergenic	Intergenic	-72940	ENSMUST00000189427.6	ENSMUSG00000036155	ENSMUST00000189427			Mgat5			protein_coding
e11ve16_cond1_858	chr1	127203773	127204844	+	10.5873	NA	promoter-TSS (ENSMUST00000038361.10)	protein_coding-promoter-TSS (ENSMUST00000038361.10)	-707	ENSMUST00000189427.6	ENSMUSG00000036155	ENSMUST00000189427			Mgat5			protein_coding
e11ve16_cond1_859	chr1	127205348	127206528	+	9.6001	NA	intron (ENSMUST00000189427.6, intron 1 of 7)	protein_coding-intron (ENSMUST00000038361.10, intron 1 of 17)	910	ENSMUST00000190921.1	ENSMUSG00000036155	ENSMUST00000189427			Mgat5			protein_coding
e11ve16_cond1_860	chr1	127365576	127366822	+	7.72101	NA	intron (ENSMUST00000189427.6, intron 4 of 7)	protein_coding-intron (ENSMUST00000038361.10, intron 5 of 17)	-8932	ENSMUST00000083753.1	ENSMUSG00000065687	ENSMUST00000083753			Gm23734			snoRNA
e11ve16_cond1_861	chr1	127400825	127401061	+	4.08888	NA	intron (ENSMUST00000171405.1, intron 9 of 15)	protein_coding-intron (ENSMUST00000038361.10, intron 11 of 17)	-5833	ENSMUST00000195573.1	ENSMUSG00000103390	ENSMUST00000195573			Gm38301			TEC
e11ve16_cond1_862	chr1	127458549	127459463	+	7.7017	NA	intron (ENSMUST00000171405.1, intron 11 of 15)	protein_coding-intron (ENSMUST00000038361.10, intron 13 of 17)	41338	ENSMUST00000160111.7	ENSMUSG00000026347	ENSMUST00000185560			Tmem163			protein_coding
e11ve16_cond1_863	chr1	127496911	127497192	+	3.86822	NA	intron (ENSMUST00000160111.7, intron 1 of 2)	protein_coding-intron (ENSMUST00000027585.13, intron 6 of 8)	3293	ENSMUST00000160111.7	ENSMUSG00000026347	ENSMUST00000185560			Tmem163			protein_coding
e11ve16_cond1_864	chr1	127500447	127500696	+	3.75868	NA	promoter-TSS (ENSMUST00000160111.7)	protein_coding-promoter-TSS (ENSMUST00000160111.7)	-227	ENSMUST00000160111.7	ENSMUSG00000026347	ENSMUST00000185560			Tmem163			protein_coding
e11ve16_cond1_865	chr1	127536813	127537927	+	9.5932	NA	promoter-TSS (ENSMUST00000162406.1)	protein_coding-promoter-TSS (ENSMUST00000162406.1)	60	ENSMUST00000162406.1	ENSMUSG00000026347	ENSMUST00000185560			Tmem163			protein_coding
e11ve16_cond1_866	chr1	127625758	127625957	+	3.6279	NA	intron (ENSMUST00000160616.7, intron 2 of 8)	protein_coding-intron (ENSMUST00000027585.13, intron 2 of 8)	52164	ENSMUST00000160616.7	ENSMUSG00000026347	ENSMUST00000185560			Tmem163			protein_coding
e11ve16_cond1_867	chr1	127661205	127661870	+	9.10954	NA	intron (ENSMUST00000160616.7, intron 2 of 8)	protein_coding-intron (ENSMUST00000027585.13, intron 2 of 8)	16484	ENSMUST00000160616.7	ENSMUSG00000026347	ENSMUST00000185560			Tmem163			protein_coding
e11ve16_cond1_868	chr1	127676970	127678157	+	5.46339	NA	exon (ENSMUST00000027585.13, exon 1 of 9)	protein_coding-exon (ENSMUST00000027585.13, exon 1 of 9)	458	ENSMUST00000160616.7	ENSMUSG00000026347	ENSMUST00000185560			Tmem163			protein_coding
e11ve16_cond1_869	chr1	128471837	128472686	+	17.2224	NA	Intergenic	Intergenic	-17779	ENSMUST00000157571.1	ENSMUSG00000088196	ENSMUST00000157571			Gm23902			snoRNA
e11ve16_cond1_870	chr1	128591380	128592397	+	5.45494	NA	intron (ENSMUST00000142893.1, intron 1 of 1)	protein_coding-intron (ENSMUST00000052172.6, intron 1 of 1)	402	ENSMUST00000052172.6	ENSMUSG00000045382	ENSMUST00000052172			Cxcr4			protein_coding
e11ve16_cond1_871	chr1	128611792	128612349	+	8.19877	NA	Intergenic	Intergenic	-19777	ENSMUST00000142893.1	ENSMUSG00000045382	ENSMUST00000052172			Cxcr4			protein_coding
e11ve16_cond1_872	chr1	128642633	128644050	+	11.1356	NA	Intergenic	Intergenic	-51048	ENSMUST00000142893.1	ENSMUSG00000045382	ENSMUST00000052172			Cxcr4			protein_coding
e11ve16_cond1_873	chr1	128653054	128653682	+	6.38082	NA	Intergenic	Intergenic	-61075	ENSMUST00000142893.1	ENSMUSG00000045382	ENSMUST00000052172			Cxcr4			protein_coding
e11ve16_cond1_874	chr1	128765958	128766459	+	3.92701	NA	Intergenic	Intergenic	8213	ENSMUST00000181951.1	ENSMUSG00000097283	ENSMUST00000181951			Gm26686			lncRNA
e11ve16_cond1_875	chr1	128803726	128804338	+	4.9921	NA	Intergenic	Intergenic	-29611	ENSMUST00000181951.1	ENSMUSG00000097283	ENSMUST00000181951			Gm26686			lncRNA
e11ve16_cond1_876	chr1	129069740	129069995	+	5.87332	NA	Intergenic	Intergenic	-183848	ENSMUST00000082803.1	ENSMUSG00000064737	ENSMUST00000082803			Gm23056			snRNA
e11ve16_cond1_877	chr1	129081890	129082797	+	9.02158	NA	Intergenic	Intergenic	-190959	ENSMUST00000148051.1	ENSMUSG00000042581	ENSMUST00000143130			Thsd7b			protein_coding
e11ve16_cond1_878	chr1	129272767	129274144	+	16.8103	NA	promoter-TSS (ENSMUST00000040311.13)	protein_coding-promoter-TSS (ENSMUST00000040311.13)	-8	ENSMUST00000040311.13	ENSMUSG00000042581	ENSMUST00000143130			Thsd7b			protein_coding
e11ve16_cond1_879	chr1	129562173	129562396	+	4.20807	NA	intron (ENSMUST00000152305.2, intron 1 of 3)	protein_coding-intron (ENSMUST00000040311.13, intron 2 of 15)	24773	ENSMUST00000152305.2	ENSMUSG00000042581	ENSMUST00000143130			Thsd7b			protein_coding
e11ve16_cond1_880	chr1	129562514	129563094	+	12.0403	NA	intron (ENSMUST00000152305.2, intron 1 of 3)	protein_coding-intron (ENSMUST00000040311.13, intron 2 of 15)	25293	ENSMUST00000152305.2	ENSMUSG00000042581	ENSMUST00000143130			Thsd7b			protein_coding
e11ve16_cond1_881	chr1	130272539	130272757	+	5.42404	NA	intron (ENSMUST00000155992.1, intron 1 of 1)	lncRNA-intron (ENSMUST00000155992.1, intron 1 of 1)	8610	ENSMUST00000155992.1	ENSMUSG00000086633	ENSMUST00000155992			Gm16081			lncRNA
e11ve16_cond1_882	chr1	130275083	130275685	+	5.39111	NA	intron (ENSMUST00000155992.1, intron 1 of 1)	lncRNA-intron (ENSMUST00000155992.1, intron 1 of 1)	5874	ENSMUST00000155992.1	ENSMUSG00000086633	ENSMUST00000155992			Gm16081			lncRNA
e11ve16_cond1_883	chr1	130717245	130717527	+	4.99721	NA	promoter-TSS (ENSMUST00000049813.5)	protein_coding-promoter-TSS (ENSMUST00000049813.5)	59	ENSMUST00000049813.5	ENSMUSG00000046404	ENSMUST00000049813			Yod1			protein_coding
e11ve16_cond1_884	chr1	130783593	130783975	+	4.66142	NA	exon (ENSMUST00000189150.1, exon 4 of 4)	lncRNA-exon (ENSMUST00000189150.1, exon 4 of 4)	-17118	ENSMUST00000027670.3	ENSMUSG00000026415	ENSMUST00000027670			Fcamr			protein_coding
e11ve16_cond1_885	chr1	130875363	130875899	+	8.75928	NA	TTS (ENSMUST00000149355.1)	protein_coding-TTS (ENSMUST00000149355.1)	-2527	ENSMUST00000126821.1	ENSMUSG00000042474	ENSMUST00000126821			Fcmr			protein_coding
e11ve16_cond1_886	chr1	130877346	130877693	+	3.46386	NA	promoter-TSS (ENSMUST00000126821.1)	protein_coding-promoter-TSS (ENSMUST00000126821.1)	-639	ENSMUST00000126821.1	ENSMUSG00000042474	ENSMUST00000126821			Fcmr			protein_coding
e11ve16_cond1_887	chr1	130878518	130878747	+	3.56178	NA	intron (ENSMUST00000145446.1, intron 1 of 1)	protein_coding-intron (ENSMUST00000038829.6, intron 7 of 7)	301	ENSMUST00000145446.1	ENSMUSG00000042474	ENSMUST00000126821			Fcmr			protein_coding
e11ve16_cond1_888	chr1	131020262	131021056	+	8.0675	NA	intron (ENSMUST00000016673.5, intron 1 of 4)	protein_coding-intron (ENSMUST00000016673.5, intron 1 of 4)	814	ENSMUST00000016673.5	ENSMUSG00000016529	ENSMUST00000016673			Il10			protein_coding
e11ve16_cond1_889	chr1	131083597	131084468	+	6.82835	NA	intron (ENSMUST00000016672.10, intron 1 of 9)	protein_coding-intron (ENSMUST00000016672.10, intron 1 of 9)	8117	ENSMUST00000191688.1	ENSMUSG00000102856	ENSMUST00000191688			Gm37084			TEC
e11ve16_cond1_890	chr1	131137710	131137961	+	3.70082	NA	intron (ENSMUST00000016670.8, intron 1 of 2)	protein_coding-intron (ENSMUST00000016670.8, intron 1 of 2)	410	ENSMUST00000189756.1	ENSMUSG00000016526	ENSMUST00000016670			Dyrk3			protein_coding
e11ve16_cond1_891	chr1	131153286	131153792	+	6.96065	NA	intron (ENSMUST00000112446.8, intron 1 of 14)	protein_coding-intron (ENSMUST00000068791.10, intron 1 of 12)	358	ENSMUST00000151874.7	ENSMUSG00000026427	ENSMUST00000112446			Eif2d			protein_coding
e11ve16_cond1_892	chr1	131199866	131200223	+	3.99397	NA	promoter-TSS (ENSMUST00000068564.14)	protein_coding-promoter-TSS (ENSMUST00000068564.14)	91	ENSMUST00000068564.14	ENSMUSG00000026430	ENSMUST00000068564			Rassf5			protein_coding
e11ve16_cond1_893	chr1	131258957	131260316	+	10.0494	NA	exon (ENSMUST00000162437.1, exon 2 of 4)	protein_coding-exon (ENSMUST00000162437.1, exon 2 of 4)	129	ENSMUST00000188115.1	ENSMUSG00000102027	ENSMUST00000188115			Gm28914			lncRNA
e11ve16_cond1_894	chr1	131260508	131260807	+	5.38645	NA	TTS (ENSMUST00000188115.1)	lncRNA-TTS (ENSMUST00000188115.1)	1150	ENSMUST00000188115.1	ENSMUSG00000102027	ENSMUST00000188115			Gm28914			lncRNA
e11ve16_cond1_895	chr1	131279766	131280087	+	4.12563	NA	promoter-TSS (ENSMUST00000062108.9)	protein_coding-promoter-TSS (ENSMUST00000062108.9)	-320	ENSMUST00000062108.9	ENSMUSG00000042349	ENSMUST00000162285			Ikbke			protein_coding
e11ve16_cond1_896	chr1	131427341	131427811	+	5.3174	NA	intron (ENSMUST00000185445.2, intron 2 of 2)	protein_coding-intron (ENSMUST00000097588.8, intron 3 of 22)	-18363	ENSMUST00000191427.1	ENSMUSG00000101778	ENSMUST00000191427			Gm29488			lncRNA
e11ve16_cond1_897	chr1	131525584	131525825	+	5.53222	NA	intron (ENSMUST00000097588.8, intron 1 of 22)	protein_coding-intron (ENSMUST00000097588.8, intron 1 of 22)	1643	ENSMUST00000186543.6	ENSMUSG00000026425	ENSMUST00000187273			Srgap2			protein_coding
e11ve16_cond1_898	chr1	131598747	131598976	+	4.25628	NA	promoter-TSS (ENSMUST00000027690.6)	protein_coding-promoter-TSS (ENSMUST00000027690.6)	-378	ENSMUST00000027690.6	ENSMUSG00000026432	ENSMUST00000190410			Avpr1b			protein_coding
e11ve16_cond1_899	chr1	131599085	131599951	+	4.11124	NA	promoter-TSS (ENSMUST00000190410.1)	protein_coding-promoter-TSS (ENSMUST00000190410.1)	-205	ENSMUST00000190410.1	ENSMUSG00000026432	ENSMUST00000190410			Avpr1b			protein_coding
e11ve16_cond1_900	chr1	131612734	131612966	+	8.77064	NA	TTS (ENSMUST00000027690.6)	protein_coding-TTS (ENSMUST00000027690.6)	13127	ENSMUST00000190410.1	ENSMUSG00000026432	ENSMUST00000190410			Avpr1b			protein_coding
e11ve16_cond1_901	chr1	131623911	131624833	+	4.71912	NA	Intergenic	Intergenic	8597	ENSMUST00000179174.2	ENSMUSG00000095841	ENSMUST00000179174			Gm8532			processed_pseudogene
e11ve16_cond1_902	chr1	131657817	131658155	+	4.22467	NA	intron (ENSMUST00000112411.1, intron 1 of 8)	protein_coding-intron (ENSMUST00000073350.12, intron 1 of 9)	-3925	ENSMUST00000141061.1	ENSMUSG00000004552	ENSMUST00000112411			Ctse			protein_coding
e11ve16_cond1_903	chr1	131743435	131743831	+	5.13282	NA	promoter-TSS (ENSMUST00000049027.9)	protein_coding-promoter-TSS (ENSMUST00000049027.9)	-389	ENSMUST00000049027.9	ENSMUSG00000042268	ENSMUST00000049027			Slc26a9			protein_coding
e11ve16_cond1_904	chr1	131867869	131868159	+	3.53849	NA	intron (ENSMUST00000125925.1, intron 1 of 4)	protein_coding-intron (ENSMUST00000027693.7, intron 2 of 5)	361	ENSMUST00000187084.1	ENSMUSG00000026433	ENSMUST00000187084			Rab29			protein_coding
e11ve16_cond1_905	chr1	131970550	131971342	+	4.43934	NA	intron (ENSMUST00000027695.7, intron 1 of 4)	protein_coding-intron (ENSMUST00000027695.7, intron 1 of 4)	337	ENSMUST00000027695.7	ENSMUSG00000026435	ENSMUST00000185387			Slc45a3			protein_coding
e11ve16_cond1_906	chr1	131972228	131972718	+	5.95427	NA	intron (ENSMUST00000027695.7, intron 1 of 4)	protein_coding-intron (ENSMUST00000027695.7, intron 1 of 4)	1864	ENSMUST00000027695.7	ENSMUSG00000026435	ENSMUST00000185387			Slc45a3			protein_coding
e11ve16_cond1_907	chr1	131982271	131982958	+	3.46782	NA	TTS (ENSMUST00000185387.1)	protein_coding-TTS (ENSMUST00000185387.1)	3650	ENSMUST00000185387.1	ENSMUSG00000026435	ENSMUST00000185387			Slc45a3			protein_coding
e11ve16_cond1_908	chr1	132131021	132131566	+	7.32556	NA	intron (ENSMUST00000112362.2, intron 2 of 16)	protein_coding-intron (ENSMUST00000027697.11, intron 1 of 15)	-8211	ENSMUST00000187926.1	ENSMUSG00000099874	ENSMUST00000187926			Gm29629			lncRNA
e11ve16_cond1_909	chr1	132151653	132151896	+	3.56509	NA	Intergenic	Intergenic	-12090	ENSMUST00000027697.11	ENSMUSG00000026437	ENSMUST00000185601			Cdk18			protein_coding
e11ve16_cond1_910	chr1	132190797	132191081	+	3.93474	NA	promoter-TSS (ENSMUST00000112357.8)	protein_coding-promoter-TSS (ENSMUST00000112357.8)	-492	ENSMUST00000188169.6	ENSMUSG00000079330	ENSMUST00000189086			Lemd1			protein_coding
e11ve16_cond1_911	chr1	132295709	132295961	+	3.46223	NA	Intergenic	Intergenic	-2791	ENSMUST00000046071.4	ENSMUSG00000042115	ENSMUST00000046071			Klhdc8a			protein_coding
e11ve16_cond1_912	chr1	132298021	132298275	+	3.433	NA	promoter-TSS (ENSMUST00000046071.4)	protein_coding-promoter-TSS (ENSMUST00000046071.4)	-478	ENSMUST00000046071.4	ENSMUSG00000042115	ENSMUST00000046071			Klhdc8a			protein_coding
e11ve16_cond1_913	chr1	132355187	132355498	+	5.0988	NA	TTS (ENSMUST00000045473.15)	protein_coding-TTS (ENSMUST00000045473.15)	9606	ENSMUST00000125439.1	ENSMUSG00000042066	ENSMUST00000125439			Tmcc2			protein_coding
e11ve16_cond1_914	chr1	132371983	132372210	+	4.42428	NA	intron (ENSMUST00000132435.1, intron 2 of 4)	protein_coding-intron (ENSMUST00000045473.15, intron 2 of 4)	-4209	ENSMUST00000142609.7	ENSMUSG00000042066	ENSMUST00000125439			Tmcc2			protein_coding
e11ve16_cond1_915	chr1	132390399	132391857	+	8.89243	NA	promoter-TSS (ENSMUST00000132435.1)	protein_coding-promoter-TSS (ENSMUST00000132435.1)	153	ENSMUST00000045473.15	ENSMUSG00000042066	ENSMUST00000125439			Tmcc2			protein_coding
e11ve16_cond1_916	chr1	132476663	132477106	+	7.26727	NA	promoter-TSS (ENSMUST00000027700.14)	protein_coding-promoter-TSS (ENSMUST00000027700.14)	161	ENSMUST00000180835.1	ENSMUSG00000097760	ENSMUST00000188203			6030442K20Rik			lncRNA
e11ve16_cond1_917	chr1	132477329	132478063	+	6.54821	NA	promoter-TSS (ENSMUST00000180835.1)	lncRNA-promoter-TSS (ENSMUST00000180835.1)	54	ENSMUST00000189786.2	ENSMUSG00000026439	ENSMUST00000188575			Rbbp5			protein_coding
e11ve16_cond1_918	chr1	132525939	132527218	+	12.7364	NA	intron (ENSMUST00000190601.6, intron 6 of 21)	protein_coding-intron (ENSMUST00000086521.10, intron 7 of 22)	-3185	ENSMUST00000188065.6	ENSMUSG00000053024	ENSMUST00000186487			Cntn2			protein_coding
e11ve16_cond1_919	chr1	132527471	132527801	+	6.80082	NA	intron (ENSMUST00000190601.6, intron 6 of 21)	protein_coding-intron (ENSMUST00000086521.10, intron 7 of 22)	-4243	ENSMUST00000188065.6	ENSMUSG00000053024	ENSMUST00000186487			Cntn2			protein_coding
e11ve16_cond1_920	chr1	132538246	132539046	+	8.50368	NA	intron (ENSMUST00000186530.2, intron 2 of 2)	protein_coding-intron (ENSMUST00000086521.10, intron 1 of 22)	4219	ENSMUST00000190601.6	ENSMUSG00000053024	ENSMUST00000186487			Cntn2			protein_coding
e11ve16_cond1_921	chr1	132540993	132541441	+	5.1703	NA	intron (ENSMUST00000186530.2, intron 2 of 2)	protein_coding-intron (ENSMUST00000086521.10, intron 1 of 22)	1648	ENSMUST00000190601.6	ENSMUSG00000053024	ENSMUST00000186487			Cntn2			protein_coding
e11ve16_cond1_922	chr1	132586670	132587128	+	6.67551	NA	intron (ENSMUST00000094569.10, intron 25 of 29)	protein_coding-intron (ENSMUST00000043189.13, intron 24 of 26)	241	ENSMUST00000186330.1	ENSMUSG00000026442	ENSMUST00000163770			Nfasc			protein_coding
e11ve16_cond1_923	chr1	132594864	132595611	+	5.41293	NA	intron (ENSMUST00000163770.7, intron 24 of 27)	protein_coding-intron (ENSMUST00000043189.13, intron 23 of 26)	-8097	ENSMUST00000186330.1	ENSMUSG00000026442	ENSMUST00000163770			Nfasc			protein_coding
e11ve16_cond1_924	chr1	132641461	132641781	+	6.45892	NA	intron (ENSMUST00000187861.6, intron 3 of 31)	protein_coding-intron (ENSMUST00000043189.13, intron 3 of 26)	-4530	ENSMUST00000186389.6	ENSMUSG00000026442	ENSMUST00000163770			Nfasc			protein_coding
e11ve16_cond1_925	chr1	132739112	132739383	+	11.3524	NA	intron (ENSMUST00000189219.1, intron 1 of 2)	protein_coding-intron (ENSMUST00000094569.10, intron 1 of 29)	2510	ENSMUST00000094569.10	ENSMUSG00000026442	ENSMUST00000163770			Nfasc			protein_coding
e11ve16_cond1_926	chr1	132741537	132741995	+	6.24013	NA	promoter-TSS (ENSMUST00000094569.10)	protein_coding-promoter-TSS (ENSMUST00000094569.10)	-3	ENSMUST00000163770.7	ENSMUSG00000026442	ENSMUST00000163770			Nfasc			protein_coding
e11ve16_cond1_927	chr1	132758836	132759216	+	4.51262	NA	Intergenic	Intergenic	-17229	ENSMUST00000188307.1	ENSMUSG00000026442	ENSMUST00000163770			Nfasc			protein_coding
e11ve16_cond1_928	chr1	132765928	132766422	+	5.72013	NA	Intergenic	Intergenic	-24378	ENSMUST00000188307.1	ENSMUSG00000026442	ENSMUST00000163770			Nfasc			protein_coding
e11ve16_cond1_929	chr1	132880183	132881743	+	8.64971	NA	intron (ENSMUST00000159088.1, intron 1 of 1)	protein_coding-intron (ENSMUST00000027706.3, intron 1 of 1)	608	ENSMUST00000159088.1	ENSMUSG00000026443	ENSMUST00000159088			Lrrn2			protein_coding
e11ve16_cond1_930	chr1	132917910	132918180	+	6.68566	NA	intron (ENSMUST00000159088.1, intron 1 of 1)	protein_coding-intron (ENSMUST00000027706.3, intron 1 of 1)	5699	ENSMUST00000196792.1	ENSMUSG00000106377	ENSMUST00000196792			Gm44300			miRNA
e11ve16_cond1_931	chr1	133045348	133046043	+	6.96886	NA	promoter-TSS (ENSMUST00000077730.6)	protein_coding-promoter-TSS (ENSMUST00000077730.6)	28	ENSMUST00000153707.7	ENSMUSG00000026447	ENSMUST00000124934			Pik3c2b			protein_coding
e11ve16_cond1_932	chr1	133046911	133047386	+	4.98041	NA	intron (ENSMUST00000145153.7, intron 1 of 1)	protein_coding-intron (ENSMUST00000077730.6, intron 1 of 32)	1136	ENSMUST00000145153.7	ENSMUSG00000026447	ENSMUST00000124934			Pik3c2b			protein_coding
e11ve16_cond1_933	chr1	133101338	133101622	+	3.24862	NA	intron (ENSMUST00000077730.6, intron 28 of 32)	protein_coding-intron (ENSMUST00000077730.6, intron 28 of 32)	-29663	ENSMUST00000052529.3	ENSMUSG00000046062	ENSMUST00000052529			Ppp1r15b			protein_coding
e11ve16_cond1_934	chr1	133164505	133164991	+	6.46466	NA	intron (ENSMUST00000212252.1, intron 1 of 9)	protein_coding-intron (ENSMUST00000212252.1, intron 1 of 9)	538	ENSMUST00000212252.1	ENSMUSG00000041757	ENSMUST00000190694			Plekha6			protein_coding
e11ve16_cond1_935	chr1	133181159	133182619	+	12.1256	NA	intron (ENSMUST00000187285.6, intron 1 of 22)	protein_coding-intron (ENSMUST00000187285.6, intron 1 of 22)	568	ENSMUST00000187285.6	ENSMUSG00000041757	ENSMUST00000190694			Plekha6			protein_coding
e11ve16_cond1_936	chr1	133217512	133218187	+	4.82609	NA	intron (ENSMUST00000187285.6, intron 1 of 22)	protein_coding-intron (ENSMUST00000187285.6, intron 1 of 22)	-28248	ENSMUST00000105082.8	ENSMUSG00000041757	ENSMUST00000190694			Plekha6			protein_coding
e11ve16_cond1_937	chr1	133253485	133253767	+	4.57307	NA	TTS (ENSMUST00000186027.1)	lncRNA-TTS (ENSMUST00000186027.1)	666	ENSMUST00000191132.1	ENSMUSG00000101693	ENSMUST00000191207			Gm19461			lncRNA
e11ve16_cond1_938	chr1	133255335	133256214	+	8.48851	NA	promoter-TSS (ENSMUST00000212142.1)	protein_coding-promoter-TSS (ENSMUST00000212142.1)	578	ENSMUST00000186027.1	ENSMUSG00000101693	ENSMUST00000191207			Gm19461			lncRNA
e11ve16_cond1_939	chr1	133265479	133265834	+	6.24727	NA	TTS (ENSMUST00000239123.1)	protein_coding-TTS (ENSMUST00000239123.1)	-3800	ENSMUST00000190694.1	ENSMUSG00000041757	ENSMUST00000190694			Plekha6			protein_coding
e11ve16_cond1_940	chr1	133363236	133363510	+	3.24008	NA	promoter-TSS (ENSMUST00000135222.8)	protein_coding-promoter-TSS (ENSMUST00000135222.8)	-199	ENSMUST00000135222.8	ENSMUSG00000070644	ENSMUST00000131450			Etnk2			protein_coding
e11ve16_cond1_941	chr1	133363776	133364415	+	6.46735	NA	intron (ENSMUST00000135222.8, intron 1 of 7)	protein_coding-intron (ENSMUST00000135222.8, intron 1 of 7)	519	ENSMUST00000147909.7	ENSMUSG00000070644	ENSMUST00000131450			Etnk2			protein_coding
e11ve16_cond1_942	chr1	133492860	133493682	+	7.50332	NA	Intergenic	Intergenic	-36208	ENSMUST00000188004.1	ENSMUSG00000101004	ENSMUST00000188004			Gm8596			processed_pseudogene
e11ve16_cond1_943	chr1	133660680	133660900	+	3.87842	NA	exon (ENSMUST00000179598.3, exon 1 of 17)	protein_coding-exon (ENSMUST00000179598.3, exon 1 of 17)	491	ENSMUST00000191705.5	ENSMUSG00000102976	ENSMUST00000194668			Zc3h11a			protein_coding
e11ve16_cond1_944	chr1	133693855	133695055	+	4.6132	NA	Intergenic	Intergenic	-4347	ENSMUST00000169295.7	ENSMUSG00000051998	ENSMUST00000169295			Lax1			protein_coding
e11ve16_cond1_945	chr1	133854898	133855129	+	3.90849	NA	Intergenic	Intergenic	19824	ENSMUST00000190927.1	ENSMUSG00000100830	ENSMUST00000190927			Gm28441			lncRNA
e11ve16_cond1_946	chr1	134066762	134067138	+	4.95698	NA	Intergenic	Intergenic	12170	ENSMUST00000020692.6	ENSMUSG00000020423	ENSMUST00000020692			Btg2			protein_coding
e11ve16_cond1_947	chr1	134078727	134079168	+	4.76375	NA	exon (ENSMUST00000020692.6, exon 1 of 2)	protein_coding-exon (ENSMUST00000020692.6, exon 1 of 2)	173	ENSMUST00000020692.6	ENSMUSG00000020423	ENSMUST00000020692			Btg2			protein_coding
e11ve16_cond1_948	chr1	134079412	134079850	+	4.16338	NA	promoter-TSS (ENSMUST00000020692.6)	protein_coding-promoter-TSS (ENSMUST00000020692.6)	-511	ENSMUST00000020692.6	ENSMUSG00000020423	ENSMUST00000020692			Btg2			protein_coding
e11ve16_cond1_949	chr1	134099554	134099808	+	4.04941	NA	promoter-TSS (ENSMUST00000193617.1)	TEC-promoter-TSS (ENSMUST00000193617.1)	-522	ENSMUST00000193617.1	ENSMUSG00000102380	ENSMUST00000193617			Gm38140			TEC
e11ve16_cond1_950	chr1	134205886	134206181	+	4.30715	NA	intron (ENSMUST00000187631.1, intron 2 of 2)	protein_coding-intron (ENSMUST00000038191.7, intron 1 of 1)	12576	ENSMUST00000191577.1	ENSMUSG00000042451	ENSMUST00000191577			Mybph			protein_coding
e11ve16_cond1_951	chr1	134343812	134344054	+	3.82429	NA	Intergenic	Intergenic	6372	ENSMUST00000189572.1	ENSMUSG00000042305	ENSMUST00000185903			Tmem183a			protein_coding
e11ve16_cond1_952	chr1	134344262	134344705	+	3.42705	NA	Intergenic	Intergenic	5822	ENSMUST00000189572.1	ENSMUSG00000042305	ENSMUST00000185903			Tmem183a			protein_coding
e11ve16_cond1_953	chr1	134556375	134556804	+	3.39773	NA	Intergenic	Intergenic	-3582	ENSMUST00000047714.13	ENSMUSG00000042207	ENSMUST00000133725			Kdm5b			protein_coding
e11ve16_cond1_954	chr1	134560798	134561415	+	4.22877	NA	intron (ENSMUST00000047714.13, intron 1 of 26)	protein_coding-intron (ENSMUST00000047714.13, intron 1 of 26)	899	ENSMUST00000112197.2	ENSMUSG00000042207	ENSMUST00000133725			Kdm5b			protein_coding
e11ve16_cond1_955	chr1	134646351	134646945	+	4.10992	NA	promoter-TSS (ENSMUST00000181197.1)	lncRNA-promoter-TSS (ENSMUST00000181197.1)	-29	ENSMUST00000187725.6	ENSMUSG00000026452	ENSMUST00000188842			Syt2			protein_coding
e11ve16_cond1_956	chr1	134708615	134709649	+	10.7364	NA	promoter-TSS (ENSMUST00000121990.1)	protein_coding-promoter-TSS (ENSMUST00000121990.1)	-168	ENSMUST00000121990.1	ENSMUSG00000026452	ENSMUST00000188842			Syt2			protein_coding
e11ve16_cond1_957	chr1	134713741	134714328	+	6.11167	NA	intron (ENSMUST00000121990.1, intron 1 of 8)	protein_coding-intron (ENSMUST00000121990.1, intron 1 of 8)	4734	ENSMUST00000121990.1	ENSMUSG00000026452	ENSMUST00000188842			Syt2			protein_coding
e11ve16_cond1_958	chr1	135003242	135003501	+	5.60314	NA	intron (ENSMUST00000044828.13, intron 8 of 17)	protein_coding-intron (ENSMUST00000044828.13, intron 8 of 17)	14408	ENSMUST00000137968.7	ENSMUSG00000042793	ENSMUST00000044828			Lgr6			protein_coding
e11ve16_cond1_959	chr1	135020874	135021097	+	3.31655	NA	intron (ENSMUST00000044828.13, intron 6 of 17)	protein_coding-intron (ENSMUST00000044828.13, intron 6 of 17)	1106	ENSMUST00000139369.1	ENSMUSG00000042793	ENSMUST00000044828			Lgr6			protein_coding
e11ve16_cond1_960	chr1	135085779	135085990	+	3.44065	NA	intron (ENSMUST00000044828.13, intron 1 of 17)	protein_coding-intron (ENSMUST00000044828.13, intron 1 of 17)	19392	ENSMUST00000044828.13	ENSMUSG00000042793	ENSMUST00000044828			Lgr6			protein_coding
e11ve16_cond1_961	chr1	135154102	135154494	+	5.46105	NA	TTS (ENSMUST00000123344.1)	protein_coding-TTS (ENSMUST00000123344.1)	116	ENSMUST00000141177.1	ENSMUSG00000026426	ENSMUST00000141177			Arl8a			protein_coding
e11ve16_cond1_962	chr1	135170372	135170687	+	4.50201	NA	Intergenic	Intergenic	-2848	ENSMUST00000027682.8	ENSMUSG00000026424	ENSMUST00000027682			Gpr37l1			protein_coding
e11ve16_cond1_963	chr1	135171352	135171654	+	4.80375	NA	Intergenic	Intergenic	-3822	ENSMUST00000027682.8	ENSMUSG00000026424	ENSMUST00000027682			Gpr37l1			protein_coding
e11ve16_cond1_964	chr1	135374258	135375039	+	12.6468	NA	intron (ENSMUST00000159181.1, intron 1 of 1)	protein_coding-intron (ENSMUST00000041240.3, intron 1 of 4)	429	ENSMUST00000159181.1	ENSMUSG00000041889	ENSMUST00000041240			Shisa4			protein_coding
e11ve16_cond1_965	chr1	135429836	135430071	+	4.01614	NA	intron (ENSMUST00000161838.7, intron 1 of 7)	protein_coding-intron (ENSMUST00000161838.7, intron 1 of 7)	466	ENSMUST00000159173.1	ENSMUSG00000041879	ENSMUST00000161704			Ipo9			protein_coding
e11ve16_cond1_966	chr1	135430411	135430831	+	6.27056	NA	promoter-TSS (ENSMUST00000041023.13)	protein_coding-promoter-TSS (ENSMUST00000041023.13)	-122	ENSMUST00000041023.13	ENSMUSG00000041879	ENSMUST00000161704			Ipo9			protein_coding
e11ve16_cond1_967	chr1	135508983	135511064	+	10.8572	NA	intron (ENSMUST00000190298.7, intron 6 of 30)	protein_coding-intron (ENSMUST00000040599.14, intron 3 of 29)	361	ENSMUST00000189362.6	ENSMUSG00000009418	ENSMUST00000190130			Nav1			protein_coding
e11ve16_cond1_968	chr1	135515711	135516032	+	4.97788	NA	intron (ENSMUST00000190298.7, intron 6 of 30)	protein_coding-intron (ENSMUST00000040599.14, intron 3 of 29)	-5420	ENSMUST00000190130.1	ENSMUSG00000009418	ENSMUST00000190130			Nav1			protein_coding
e11ve16_cond1_969	chr1	135519143	135519349	+	8.76944	NA	intron (ENSMUST00000190298.7, intron 6 of 30)	protein_coding-intron (ENSMUST00000040599.14, intron 3 of 29)	6092	ENSMUST00000192904.1	ENSMUSG00000104524	ENSMUST00000192904			Gm37333			TEC
e11ve16_cond1_970	chr1	135563965	135564268	+	6.04986	NA	intron (ENSMUST00000190298.7, intron 4 of 30)	protein_coding-intron (ENSMUST00000040599.14, intron 1 of 29)	-20657	ENSMUST00000067468.5	ENSMUSG00000054412	ENSMUST00000067468			Gm4793			lncRNA
e11ve16_cond1_971	chr1	135583970	135584204	+	23.5887	NA	promoter-TSS (ENSMUST00000067468.5)	lncRNA-promoter-TSS (ENSMUST00000067468.5)	-686	ENSMUST00000067468.5	ENSMUSG00000054412	ENSMUST00000067468			Gm4793			lncRNA
e11ve16_cond1_972	chr1	135584958	135585990	+	3.55749	NA	promoter-TSS (ENSMUST00000040599.14)	protein_coding-promoter-TSS (ENSMUST00000040599.14)	-119	ENSMUST00000040599.14	ENSMUSG00000009418	ENSMUST00000190130			Nav1			protein_coding
e11ve16_cond1_973	chr1	135686816	135687585	+	6.69394	NA	intron (ENSMUST00000112103.1, intron 1 of 1)	protein_coding-intron (ENSMUST00000112103.1, intron 1 of 1)	905	ENSMUST00000112103.1	ENSMUSG00000009418	ENSMUST00000190130			Nav1			protein_coding
e11ve16_cond1_974	chr1	135698591	135698901	+	3.8535	NA	Intergenic	Intergenic	-10641	ENSMUST00000190298.7	ENSMUSG00000009418	ENSMUST00000190130			Nav1			protein_coding
e11ve16_cond1_975	chr1	135731768	135731979	+	3.55277	NA	intron (ENSMUST00000027677.7, intron 1 of 5)	protein_coding-intron (ENSMUST00000027677.7, intron 1 of 5)	2726	ENSMUST00000027677.7	ENSMUSG00000026421	ENSMUST00000027677			Csrp1			protein_coding
e11ve16_cond1_976	chr1	135732150	135732378	+	3.80419	NA	intron (ENSMUST00000027677.7, intron 1 of 5)	protein_coding-intron (ENSMUST00000027677.7, intron 1 of 5)	3117	ENSMUST00000027677.7	ENSMUSG00000026421	ENSMUST00000027677			Csrp1			protein_coding
e11ve16_cond1_977	chr1	135740753	135740991	+	5.24037	NA	intron (ENSMUST00000097561.8, intron 2 of 5)	protein_coding-intron (ENSMUST00000027677.7, intron 2 of 5)	11725	ENSMUST00000027677.7	ENSMUSG00000026421	ENSMUST00000027677			Csrp1			protein_coding
e11ve16_cond1_978	chr1	135793952	135794916	+	4.37165	NA	intron (ENSMUST00000132795.7, intron 2 of 6)	protein_coding-intron (ENSMUST00000132795.7, intron 2 of 6)	-4968	ENSMUST00000152208.7	ENSMUSG00000026418	ENSMUST00000152075			Tnni1			protein_coding
e11ve16_cond1_979	chr1	135818154	135818620	+	6.95718	NA	promoter-TSS (ENSMUST00000038760.9)	protein_coding-promoter-TSS (ENSMUST00000038760.9)	-211	ENSMUST00000038760.9	ENSMUSG00000041782	ENSMUST00000038760			Lad1			protein_coding
e11ve16_cond1_980	chr1	135818907	135819646	+	4.85787	NA	intron (ENSMUST00000038760.9, intron 1 of 9)	protein_coding-intron (ENSMUST00000038760.9, intron 1 of 9)	678	ENSMUST00000038760.9	ENSMUSG00000041782	ENSMUST00000038760			Lad1			protein_coding
e11ve16_cond1_981	chr1	135837123	135837355	+	9.06901	NA	exon (ENSMUST00000191055.1, exon 1 of 1)	protein_coding-exon (ENSMUST00000191055.1, exon 1 of 1)	826	ENSMUST00000189355.6	ENSMUSG00000026414	ENSMUST00000191055			Tnnt2			protein_coding
e11ve16_cond1_982	chr1	135847011	135847312	+	4.04786	NA	intron (ENSMUST00000112086.2, intron 5 of 13)	protein_coding-intron (ENSMUST00000027671.11, intron 5 of 13)	-2289	ENSMUST00000188098.1	ENSMUSG00000026414	ENSMUST00000191055			Tnnt2			protein_coding
e11ve16_cond1_983	chr1	135945603	135945920	+	3.47493	NA	Intergenic	Intergenic	17379	ENSMUST00000140703.7	ENSMUSG00000051985	ENSMUST00000124134			Igfn1			protein_coding
e11ve16_cond1_984	chr1	136018380	136018736	+	3.24612	NA	exon (ENSMUST00000063719.14, exon 2 of 6)	protein_coding-exon (ENSMUST00000063719.14, exon 2 of 6)	496	ENSMUST00000117950.1	ENSMUSG00000026411	ENSMUST00000118832			Tmem9			protein_coding
e11ve16_cond1_985	chr1	136018865	136019083	+	4.14046	NA	intron (ENSMUST00000165125.7, intron 2 of 5)	protein_coding-intron (ENSMUST00000063719.14, intron 2 of 5)	912	ENSMUST00000117950.1	ENSMUSG00000026411	ENSMUST00000118832			Tmem9			protein_coding
e11ve16_cond1_986	chr1	136051699	136051945	+	4.4589	NA	promoter-TSS (ENSMUST00000112068.9)	protein_coding-promoter-TSS (ENSMUST00000112068.9)	-928	ENSMUST00000160641.7	ENSMUSG00000026407	ENSMUST00000112064			Cacna1s			protein_coding
e11ve16_cond1_987	chr1	136130994	136132155	+	5.93161	NA	promoter-TSS (ENSMUST00000134998.7)	lncRNA-promoter-TSS (ENSMUST00000134998.7)	120	ENSMUST00000122892.1	ENSMUSG00000041642	ENSMUST00000122892			Kif21b			protein_coding
e11ve16_cond1_988	chr1	136140355	136140646	+	5.29043	NA	intron (ENSMUST00000075164.10, intron 1 of 34)	protein_coding-intron (ENSMUST00000075164.10, intron 1 of 34)	9046	ENSMUST00000122892.1	ENSMUSG00000041642	ENSMUST00000122892			Kif21b			protein_coding
e11ve16_cond1_989	chr1	136159472	136159827	+	4.08912	NA	promoter-TSS (ENSMUST00000171381.1)	protein_coding-promoter-TSS (ENSMUST00000171381.1)	-709	ENSMUST00000171381.1	ENSMUSG00000041642	ENSMUST00000122892			Kif21b			protein_coding
e11ve16_cond1_990	chr1	136170077	136170305	+	5.95743	NA	intron (ENSMUST00000130864.8, intron 30 of 35)	protein_coding-intron (ENSMUST00000075164.10, intron 30 of 34)	877	ENSMUST00000165333.1	ENSMUSG00000041642	ENSMUST00000122892			Kif21b			protein_coding
e11ve16_cond1_991	chr1	136174020	136175435	+	9.91095	NA	exon (ENSMUST00000075164.10, exon 35 of 35)	protein_coding-exon (ENSMUST00000075164.10, exon 35 of 35)	5413	ENSMUST00000165333.1	ENSMUSG00000041642	ENSMUST00000122892			Kif21b			protein_coding
e11ve16_cond1_992	chr1	136234024	136234277	+	4.34665	NA	promoter-TSS (ENSMUST00000153910.1)	protein_coding-promoter-TSS (ENSMUST00000153910.1)	-31	ENSMUST00000153910.1	ENSMUSG00000041605	ENSMUST00000194374			Inava			protein_coding
e11ve16_cond1_993	chr1	136259759	136260217	+	6.09364	NA	exon (ENSMUST00000086395.6, exon 1 of 1)	protein_coding-exon (ENSMUST00000086395.6, exon 1 of 1)	581	ENSMUST00000181385.1	ENSMUSG00000097433	ENSMUST00000181385			Gm26781			lncRNA
e11ve16_cond1_994	chr1	136337589	136338567	+	6.45328	NA	intron (ENSMUST00000194730.1, intron 1 of 2)	protein_coding-intron (ENSMUST00000048309.11, intron 1 of 18)	7620	ENSMUST00000192001.5	ENSMUSG00000041570	ENSMUST00000194808			Camsap2			protein_coding
e11ve16_cond1_995	chr1	136344872	136345621	+	4.98494	NA	intron (ENSMUST00000194730.1, intron 1 of 2)	protein_coding-intron (ENSMUST00000048309.11, intron 1 of 18)	452	ENSMUST00000192001.5	ENSMUSG00000041570	ENSMUST00000194808			Camsap2			protein_coding
e11ve16_cond1_996	chr1	136351218	136351664	+	7.98216	NA	Intergenic	Intergenic	-5337	ENSMUST00000048309.11	ENSMUSG00000041570	ENSMUST00000194808			Camsap2			protein_coding
e11ve16_cond1_997	chr1	136466300	136466790	+	4.44014	NA	intron (ENSMUST00000187963.6, intron 1 of 14)	protein_coding-intron (ENSMUST00000187963.6, intron 1 of 14)	202	ENSMUST00000187963.6	ENSMUSG00000041498	ENSMUST00000187963			Kif14			protein_coding
e11ve16_cond1_998	chr1	136541709	136542270	+	4.49922	NA	intron (ENSMUST00000194018.1, intron 1 of 4)	lncRNA-intron (ENSMUST00000194018.1, intron 1 of 4)	384	ENSMUST00000194018.1	ENSMUSG00000104414	ENSMUST00000194018			Gm37799			lncRNA
e11ve16_cond1_999	chr1	136551306	136551722	+	5.05194	NA	intron (ENSMUST00000194018.1, intron 3 of 4)	lncRNA-intron (ENSMUST00000194018.1, intron 3 of 4)	9909	ENSMUST00000194018.1	ENSMUSG00000104414	ENSMUST00000194018			Gm37799			lncRNA
e11ve16_cond1_1000	chr1	136605569	136606431	+	9.87969	NA	promoter-TSS (ENSMUST00000193674.1)	lncRNA-promoter-TSS (ENSMUST00000193674.1)	-532	ENSMUST00000193674.1	ENSMUSG00000104366	ENSMUST00000193674			4933409D19Rik			lncRNA
e11ve16_cond1_1001	chr1	136624941	136625384	+	4.43794	NA	promoter-TSS (ENSMUST00000180797.1)	lncRNA-promoter-TSS (ENSMUST00000180797.1)	261	ENSMUST00000112046.1	ENSMUSG00000041483	ENSMUST00000112046			Zfp281			protein_coding
e11ve16_cond1_1002	chr1	136625534	136625733	+	3.2784	NA	promoter-TSS (ENSMUST00000180797.1)	lncRNA-promoter-TSS (ENSMUST00000180797.1)	732	ENSMUST00000112046.1	ENSMUSG00000041483	ENSMUST00000112046			Zfp281			protein_coding
e11ve16_cond1_1003	chr1	136654249	136654569	+	4.75617	NA	Intergenic	Intergenic	-16360	ENSMUST00000180495.7	ENSMUSG00000097113	ENSMUST00000180495			Gm19705			lncRNA
e11ve16_cond1_1004	chr1	136661421	136662146	+	8.25163	NA	Intergenic	Intergenic	-8986	ENSMUST00000180495.7	ENSMUSG00000097113	ENSMUST00000180495			Gm19705			lncRNA
e11ve16_cond1_1005	chr1	136664905	136665586	+	6.86721	NA	Intergenic	Intergenic	-5524	ENSMUST00000180495.7	ENSMUSG00000097113	ENSMUST00000180495			Gm19705			lncRNA
e11ve16_cond1_1006	chr1	136670090	136670547	+	4.23086	NA	promoter-TSS (ENSMUST00000180495.7)	lncRNA-promoter-TSS (ENSMUST00000180495.7)	-451	ENSMUST00000180495.7	ENSMUSG00000097113	ENSMUST00000180495			Gm19705			lncRNA
e11ve16_cond1_1007	chr1	136671886	136672330	+	4.761	NA	intron (ENSMUST00000180495.7, intron 1 of 4)	lncRNA-intron (ENSMUST00000180495.7, intron 1 of 4)	1339	ENSMUST00000180495.7	ENSMUSG00000097113	ENSMUST00000180495			Gm19705			lncRNA
e11ve16_cond1_1008	chr1	136672497	136672749	+	3.75876	NA	intron (ENSMUST00000180495.7, intron 1 of 4)	lncRNA-intron (ENSMUST00000180495.7, intron 1 of 4)	1854	ENSMUST00000180495.7	ENSMUSG00000097113	ENSMUST00000180495			Gm19705			lncRNA
e11ve16_cond1_1009	chr1	136678309	136679137	+	4.50615	NA	intron (ENSMUST00000181491.1, intron 2 of 3)	lncRNA-intron (ENSMUST00000180495.7, intron 3 of 4)	2250	ENSMUST00000181491.1	ENSMUSG00000097113	ENSMUST00000180495			Gm19705			lncRNA
e11ve16_cond1_1010	chr1	136948223	136948599	+	6.58545	NA	intron (ENSMUST00000027649.13, intron 3 of 8)	protein_coding-intron (ENSMUST00000027649.13, intron 3 of 8)	762	ENSMUST00000195428.1	ENSMUSG00000026398	ENSMUST00000168126			Nr5a2			protein_coding
e11ve16_cond1_1011	chr1	136952726	136953202	+	5.90417	NA	intron (ENSMUST00000027649.13, intron 1 of 8)	protein_coding-intron (ENSMUST00000027649.13, intron 1 of 8)	666	ENSMUST00000192929.5	ENSMUSG00000026398	ENSMUST00000168126			Nr5a2			protein_coding
e11ve16_cond1_1012	chr1	136980265	136980951	+	7.87665	NA	Intergenic	Intergenic	9662	ENSMUST00000158345.1	ENSMUSG00000088970	ENSMUST00000158345			Gm23763			snRNA
e11ve16_cond1_1013	chr1	137221502	137221969	+	4.72914	NA	Intergenic	Intergenic	-6088	ENSMUST00000104019.1	ENSMUSG00000077207	ENSMUST00000104019			Gm25609			snRNA
e11ve16_cond1_1014	chr1	137323468	137323957	+	4.91336	NA	Intergenic	Intergenic	2130	ENSMUST00000191810.1	ENSMUSG00000102738	ENSMUST00000191810			1700006P03Rik			TEC
e11ve16_cond1_1015	chr1	137635823	137636877	+	10.104	NA	Intergenic	Intergenic	-97968	ENSMUST00000158090.1	ENSMUSG00000088715	ENSMUST00000158090			Gm22727			snoRNA
e11ve16_cond1_1016	chr1	137899493	137900998	+	15.2125	NA	TTS (ENSMUST00000187561.1)	lncRNA-TTS (ENSMUST00000187561.1)	1647	ENSMUST00000182127.1	ENSMUSG00000098243	ENSMUST00000187561			Gm4258			lncRNA
e11ve16_cond1_1017	chr1	138448869	138449354	+	3.54129	NA	Intergenic	Intergenic	-66504	ENSMUST00000188729.2	ENSMUSG00000099510	ENSMUST00000188729			Gm28501			lncRNA
e11ve16_cond1_1018	chr1	138449648	138449892	+	3.55211	NA	Intergenic	Intergenic	-65845	ENSMUST00000188729.2	ENSMUSG00000099510	ENSMUST00000188729			Gm28501			lncRNA
e11ve16_cond1_1019	chr1	138513847	138514673	+	5.56001	NA	exon (ENSMUST00000191549.2, exon 7 of 7)	protein_coding-exon (ENSMUST00000191549.2, exon 7 of 7)	-1355	ENSMUST00000188729.2	ENSMUSG00000099510	ENSMUST00000188729			Gm28501			lncRNA
e11ve16_cond1_1020	chr1	138571297	138572337	+	9.55292	NA	promoter-TSS (ENSMUST00000191656.1)	TEC-promoter-TSS (ENSMUST00000191656.1)	-461	ENSMUST00000191656.1	ENSMUSG00000102448	ENSMUST00000191656			Gm37101			TEC
e11ve16_cond1_1021	chr1	138618408	138618995	+	4.34695	NA	intron (ENSMUST00000187407.6, intron 1 of 9)	protein_coding-intron (ENSMUST00000027642.4, intron 1 of 7)	973	ENSMUST00000027642.4	ENSMUSG00000026393	ENSMUST00000186017			Nek7			protein_coding
e11ve16_cond1_1022	chr1	138801496	138802643	+	12.4513	NA	Intergenic	Intergenic	31590	ENSMUST00000192425.1	ENSMUSG00000019230	ENSMUST00000112030			Lhx9			protein_coding
e11ve16_cond1_1023	chr1	138841150	138842083	+	4.55192	NA	intron (ENSMUST00000019374.13, intron 1 of 4)	protein_coding-intron (ENSMUST00000019374.13, intron 1 of 4)	813	ENSMUST00000112026.3	ENSMUSG00000019230	ENSMUST00000112030			Lhx9			protein_coding
e11ve16_cond1_1024	chr1	138848008	138848246	+	3.762	NA	promoter-TSS (ENSMUST00000046870.12)	protein_coding-promoter-TSS (ENSMUST00000046870.12)	-408	ENSMUST00000046870.12	ENSMUSG00000019230	ENSMUST00000112030			Lhx9			protein_coding
e11ve16_cond1_1025	chr1	139212149	139213001	+	6.70124	NA	intron (ENSMUST00000059825.11, intron 11 of 11)	protein_coding-intron (ENSMUST00000059825.11, intron 11 of 11)	-10289	ENSMUST00000199479.1	ENSMUSG00000063681	ENSMUST00000196402			Crb1			protein_coding
e11ve16_cond1_1026	chr1	139376766	139377044	+	3.9747	NA	exon (ENSMUST00000059825.11, exon 1 of 12)	protein_coding-exon (ENSMUST00000059825.11, exon 1 of 12)	136	ENSMUST00000196402.4	ENSMUSG00000063681	ENSMUST00000196402			Crb1			protein_coding
e11ve16_cond1_1027	chr1	140070851	140071063	+	3.60878	NA	Intergenic	Intergenic	-21928	ENSMUST00000195133.1	ENSMUSG00000103691	ENSMUST00000195133			Gm38019			processed_pseudogene
e11ve16_cond1_1028	chr1	140245757	140246340	+	6.96858	NA	promoter-TSS (ENSMUST00000119786.7)	protein_coding-promoter-TSS (ENSMUST00000119786.7)	-110	ENSMUST00000239229.1	ENSMUSG00000052726	ENSMUST00000239229			Kcnt2			protein_coding
e11ve16_cond1_1029	chr1	141296695	141297725	+	5.49293	NA	promoter-TSS (ENSMUST00000179509.1)	snRNA-promoter-TSS (ENSMUST00000179509.1)	-890	ENSMUST00000179509.1	ENSMUSG00000093879	ENSMUST00000179509			Gm25457			snRNA
e11ve16_cond1_1030	chr1	142007831	142008318	+	3.42364	NA	Intergenic	Intergenic	447740	ENSMUST00000191024.2	ENSMUSG00000099671	ENSMUST00000191024			Gm18183			processed_pseudogene
e11ve16_cond1_1031	chr1	142923407	142923768	+	8.37154	NA	Intergenic	Intergenic	168394	ENSMUST00000195327.1	ENSMUSG00000102818	ENSMUST00000195327			Gm37796			TEC
e11ve16_cond1_1032	chr1	143701958	143702185	+	7.19707	NA	exon (ENSMUST00000159794.1, exon 1 of 5)	protein_coding-exon (ENSMUST00000159794.1, exon 1 of 5)	129	ENSMUST00000159794.1	ENSMUSG00000026361	ENSMUST00000188838			Cdc73			protein_coding
e11ve16_cond1_1033	chr1	143710215	143710441	+	4.69242	NA	Intergenic	Intergenic	-6010	ENSMUST00000185367.1	ENSMUSG00000018196	ENSMUST00000148600			Glrx2			protein_coding
e11ve16_cond1_1034	chr1	143803502	143803701	+	3.83882	NA	intron (ENSMUST00000185539.1, intron 6 of 6)	protein_coding-intron (ENSMUST00000018333.12, intron 10 of 10)	8884	ENSMUST00000185539.1	ENSMUSG00000018189	ENSMUST00000189936			Uchl5			protein_coding
e11ve16_cond1_1035	chr1	143819561	143820584	+	4.99174	NA	Intergenic	Intergenic	25355	ENSMUST00000185539.1	ENSMUSG00000018189	ENSMUST00000189936			Uchl5			protein_coding
e11ve16_cond1_1036	chr1	143881032	143881767	+	5.18609	NA	Intergenic	Intergenic	86682	ENSMUST00000185539.1	ENSMUSG00000018189	ENSMUST00000189936			Uchl5			protein_coding
e11ve16_cond1_1037	chr1	144055749	144055949	+	4.98548	NA	Intergenic	Intergenic	-51688	ENSMUST00000127206.7	ENSMUSG00000026360	ENSMUST00000153527			Rgs2			protein_coding
e11ve16_cond1_1038	chr1	145289132	145289838	+	19.4884	NA	Intergenic	Intergenic	1995	ENSMUST00000157954.1	ENSMUSG00000088579	ENSMUST00000157954			Gm25460			snoRNA
e11ve16_cond1_1039	chr1	145570019	145570763	+	8.52761	NA	Intergenic	Intergenic	-243700	ENSMUST00000194549.1	ENSMUSG00000103055	ENSMUST00000194549			Gm38269			TEC
e11ve16_cond1_1040	chr1	147265652	147265891	+	4.51896	NA	Intergenic	Intergenic	16171	ENSMUST00000193584.1	ENSMUSG00000102134	ENSMUST00000193584			Gm9931			TEC
e11ve16_cond1_1041	chr1	147491009	147491680	+	7.20657	NA	Intergenic	Intergenic	14698	ENSMUST00000188981.1	ENSMUSG00000100380	ENSMUST00000188981			Gm17867			unprocessed_pseudogene
e11ve16_cond1_1042	chr1	149617321	149617795	+	5.9949	NA	Intergenic	Intergenic	89924	ENSMUST00000157542.1	ENSMUSG00000088167	ENSMUST00000157542			Gm23535			snRNA
e11ve16_cond1_1043	chr1	150506042	150506422	+	4.03631	NA	Intergenic	Intergenic	-40067	ENSMUST00000162367.7	ENSMUSG00000006014	ENSMUST00000161320			Prg4			protein_coding
e11ve16_cond1_1044	chr1	150537361	150538180	+	6.579	NA	Intergenic	Intergenic	-11547	ENSMUST00000186208.1	ENSMUSG00000101519	ENSMUST00000186208			Ska2l-ps			processed_pseudogene
e11ve16_cond1_1045	chr1	150743311	150743556	+	5.39165	NA	intron (ENSMUST00000137197.8, intron 24 of 105)	protein_coding-intron (ENSMUST00000074783.11, intron 24 of 106)	118134	ENSMUST00000177268.1	ENSMUSG00000093650	ENSMUST00000177239			Gm20631			lncRNA
e11ve16_cond1_1046	chr1	150827352	150827641	+	4.0173	NA	intron (ENSMUST00000137197.8, intron 4 of 105)	protein_coding-intron (ENSMUST00000074783.11, intron 4 of 106)	165555	ENSMUST00000074783.11	ENSMUSG00000066842	ENSMUST00000177036			Hmcn1			protein_coding
e11ve16_cond1_1047	chr1	150992129	150992621	+	3.9413	NA	intron (ENSMUST00000074783.11, intron 1 of 106)	protein_coding-intron (ENSMUST00000074783.11, intron 1 of 106)	676	ENSMUST00000074783.11	ENSMUSG00000066842	ENSMUST00000177036			Hmcn1			protein_coding
e11ve16_cond1_1048	chr1	151109291	151109726	+	5.03247	NA	TTS (ENSMUST00000191430.1)	processed_pseudogene-TTS (ENSMUST00000191430.1)	1593	ENSMUST00000191430.1	ENSMUSG00000100595	ENSMUST00000191430			Gm19087			processed_pseudogene
e11ve16_cond1_1049	chr1	151129957	151130313	+	4.11661	NA	Intergenic	Intergenic	-6372	ENSMUST00000181451.1	ENSMUSG00000097426	ENSMUST00000181451			Gm8941			processed_pseudogene
e11ve16_cond1_1050	chr1	151144127	151145270	+	6.42219	NA	Intergenic	Intergenic	6664	ENSMUST00000188305.1	ENSMUSG00000102095	ENSMUST00000188305			C730036E19Rik			lncRNA
e11ve16_cond1_1051	chr1	151168202	151168488	+	4.19028	NA	Intergenic	Intergenic	-14192	ENSMUST00000225278.1	ENSMUSG00000114212	ENSMUST00000225278			Gm47985			protein_coding
e11ve16_cond1_1052	chr1	151177107	151178326	+	6.30903	NA	Intergenic	Intergenic	-4821	ENSMUST00000225278.1	ENSMUSG00000114212	ENSMUST00000225278			Gm47985			protein_coding
e11ve16_cond1_1053	chr1	151252872	151253207	+	5.61575	NA	Intergenic	Intergenic	7875	ENSMUST00000157873.1	ENSMUSG00000088498	ENSMUST00000157873			Gm24402			snRNA
e11ve16_cond1_1054	chr1	151343708	151344164	+	5.6937	NA	promoter-TSS (ENSMUST00000023918.12)	protein_coding-promoter-TSS (ENSMUST00000023918.12)	146	ENSMUST00000185848.1	ENSMUSG00000100954	ENSMUST00000186597			Gm10138			lncRNA
e11ve16_cond1_1055	chr1	151344671	151345229	+	3.7402	NA	promoter-TSS (ENSMUST00000185848.1)	lncRNA-promoter-TSS (ENSMUST00000185848.1)	-214	ENSMUST00000206952.1	ENSMUSG00000100954	ENSMUST00000186597			Gm10138			lncRNA
e11ve16_cond1_1056	chr1	151366388	151366927	+	5.56457	NA	Intergenic	Intergenic	5410	ENSMUST00000190872.1	ENSMUSG00000023150	ENSMUST00000186745			Ivns1abp			protein_coding
e11ve16_cond1_1057	chr1	151427275	151428341	+	9.38084	NA	promoter-TSS (ENSMUST00000065625.11)	protein_coding-promoter-TSS (ENSMUST00000065625.11)	628	ENSMUST00000111883.8	ENSMUSG00000052748	ENSMUST00000064771			Swt1			protein_coding
e11ve16_cond1_1058	chr1	151499939	151500219	+	5.07247	NA	promoter-TSS (ENSMUST00000195500.1)	TEC-promoter-TSS (ENSMUST00000195500.1)	-494	ENSMUST00000195500.1	ENSMUSG00000103238	ENSMUST00000195500			Gm36527			TEC
e11ve16_cond1_1059	chr1	151570904	151571386	+	4.14866	NA	promoter-TSS (ENSMUST00000097541.9)	protein_coding-promoter-TSS (ENSMUST00000097541.9)	-41	ENSMUST00000134499.7	ENSMUSG00000026483	ENSMUST00000111875			Fam129a			protein_coding
e11ve16_cond1_1060	chr1	151631201	151631668	+	6.10488	NA	intron (ENSMUST00000134499.7, intron 2 of 4)	protein_coding-intron (ENSMUST00000097541.9, intron 1 of 14)	-45733	ENSMUST00000086267.5	ENSMUSG00000026483	ENSMUST00000111875			Fam129a			protein_coding
e11ve16_cond1_1061	chr1	151631857	151632147	+	3.89639	NA	intron (ENSMUST00000134499.7, intron 2 of 4)	protein_coding-intron (ENSMUST00000097541.9, intron 1 of 14)	-45165	ENSMUST00000086267.5	ENSMUSG00000026483	ENSMUST00000111875			Fam129a			protein_coding
e11ve16_cond1_1062	chr1	151651047	151651642	+	5.23	NA	intron (ENSMUST00000148810.7, intron 5 of 13)	protein_coding-intron (ENSMUST00000097541.9, intron 5 of 14)	-25823	ENSMUST00000086267.5	ENSMUSG00000026483	ENSMUST00000111875			Fam129a			protein_coding
e11ve16_cond1_1063	chr1	151685935	151686313	+	4.65508	NA	intron (ENSMUST00000086267.5, intron 1 of 9)	protein_coding-intron (ENSMUST00000086267.5, intron 1 of 9)	8957	ENSMUST00000086267.5	ENSMUSG00000026483	ENSMUST00000111875			Fam129a			protein_coding
e11ve16_cond1_1064	chr1	151709260	151709492	+	5.54465	NA	intron (ENSMUST00000086267.5, intron 8 of 9)	protein_coding-intron (ENSMUST00000086267.5, intron 8 of 9)	32209	ENSMUST00000086267.5	ENSMUSG00000026483	ENSMUST00000111875			Fam129a			protein_coding
e11ve16_cond1_1065	chr1	151727345	151727945	+	4.58589	NA	Intergenic	Intergenic	27373	ENSMUST00000186444.1	ENSMUSG00000100594	ENSMUST00000186444			2810414N06Rik			lncRNA
e11ve16_cond1_1066	chr1	152022066	152022347	+	3.64898	NA	intron (ENSMUST00000187603.6, intron 1 of 6)	protein_coding-intron (ENSMUST00000044581.13, intron 1 of 5)	33086	ENSMUST00000121533.2	ENSMUSG00000032666	ENSMUST00000128433			1700025G04Rik			protein_coding
e11ve16_cond1_1067	chr1	152090777	152091195	+	6.45731	NA	promoter-TSS (ENSMUST00000044581.13)	protein_coding-promoter-TSS (ENSMUST00000044581.13)	-861	ENSMUST00000044581.13	ENSMUSG00000032666	ENSMUST00000128433			1700025G04Rik			protein_coding
e11ve16_cond1_1068	chr1	152258929	152260233	+	11.1892	NA	Intergenic	Intergenic	32947	ENSMUST00000194334.1	ENSMUSG00000103744	ENSMUST00000194334			Gm38238			TEC
e11ve16_cond1_1069	chr1	152624126	152625293	+	4.35128	NA	intron (ENSMUST00000111859.7, intron 2 of 18)	protein_coding-intron (ENSMUST00000111859.7, intron 2 of 18)	320	ENSMUST00000149536.2	ENSMUSG00000026482	ENSMUST00000111857			Rgl1			protein_coding
e11ve16_cond1_1070	chr1	152690320	152691275	+	9.16834	NA	intron (ENSMUST00000111859.7, intron 1 of 18)	protein_coding-intron (ENSMUST00000111857.2, intron 1 of 17)	-3296	ENSMUST00000139309.1	ENSMUSG00000086145	ENSMUST00000139309			Gm15479			lncRNA
e11ve16_cond1_1071	chr1	152791127	152791607	+	9.13995	NA	Intergenic	Intergenic	-8827	ENSMUST00000186568.6	ENSMUSG00000026480	ENSMUST00000027754			Ncf2			protein_coding
e11ve16_cond1_1072	chr1	152816981	152817386	+	8.54972	NA	intron (ENSMUST00000190323.6, intron 3 of 4)	protein_coding-intron (ENSMUST00000027754.6, intron 3 of 14)	6293	ENSMUST00000189135.1	ENSMUSG00000026480	ENSMUST00000027754			Ncf2			protein_coding
e11ve16_cond1_1073	chr1	152828659	152829427	+	7.5412	NA	intron (ENSMUST00000186568.6, intron 8 of 15)	protein_coding-intron (ENSMUST00000027754.6, intron 7 of 14)	5474	ENSMUST00000187235.1	ENSMUSG00000026480	ENSMUST00000027754			Ncf2			protein_coding
e11ve16_cond1_1074	chr1	152884519	152885124	+	6.64617	NA	intron (ENSMUST00000111836.3, intron 1 of 22)	protein_coding-intron (ENSMUST00000073441.12, intron 1 of 21)	-4523	ENSMUST00000185888.1	ENSMUSG00000100394	ENSMUST00000185888			Gm28791			lncRNA
e11ve16_cond1_1075	chr1	152901857	152902448	+	9.70693	NA	intron (ENSMUST00000111836.3, intron 1 of 22)	protein_coding-intron (ENSMUST00000073441.12, intron 1 of 21)	470	ENSMUST00000073441.12	ENSMUSG00000042772	ENSMUST00000186900			Smg7			protein_coding
e11ve16_cond1_1076	chr1	152903795	152904718	+	5.02773	NA	Intergenic	Intergenic	-1610	ENSMUST00000111836.3	ENSMUSG00000042772	ENSMUST00000186900			Smg7			protein_coding
e11ve16_cond1_1077	chr1	152955126	152955773	+	6.00854	NA	intron (ENSMUST00000185241.1, intron 1 of 4)	protein_coding-intron (ENSMUST00000043313.14, intron 1 of 10)	175	ENSMUST00000185241.1	ENSMUSG00000042751	ENSMUST00000190960			Nmnat2			protein_coding
e11ve16_cond1_1078	chr1	153186572	153187273	+	5.88612	NA	promoter-TSS (ENSMUST00000027753.12)	protein_coding-promoter-TSS (ENSMUST00000027753.12)	-475	ENSMUST00000027753.12	ENSMUSG00000026479	ENSMUST00000185356			Lamc2			protein_coding
e11ve16_cond1_1079	chr1	153320767	153320992	+	4.8034	NA	intron (ENSMUST00000027752.14, intron 1 of 27)	protein_coding-intron (ENSMUST00000027752.14, intron 1 of 27)	11907	ENSMUST00000027752.14	ENSMUSG00000026478	ENSMUST00000159251			Lamc1			protein_coding
e11ve16_cond1_1080	chr1	153424258	153425062	+	9.48814	NA	promoter-TSS (ENSMUST00000042373.11)	protein_coding-promoter-TSS (ENSMUST00000042373.11)	-502	ENSMUST00000042373.11	ENSMUSG00000042708	ENSMUST00000136614			Shcbp1l			protein_coding
e11ve16_cond1_1081	chr1	153486155	153487175	+	8.46077	NA	intron (ENSMUST00000186966.6, intron 1 of 19)	protein_coding-intron (ENSMUST00000042141.11, intron 1 of 27)	943	ENSMUST00000186380.6	ENSMUSG00000042699	ENSMUST00000186380			Dhx9			protein_coding
e11ve16_cond1_1082	chr1	153531864	153532139	+	3.5333	NA	intron (ENSMUST00000041874.8, intron 4 of 11)	protein_coding-intron (ENSMUST00000041874.8, intron 4 of 11)	17710	ENSMUST00000187747.1	ENSMUSG00000042684	ENSMUST00000187747			Npl			protein_coding
e11ve16_cond1_1083	chr1	153641338	153642198	+	3.87168	NA	Intergenic	Intergenic	-11257	ENSMUST00000041776.11	ENSMUSG00000042671	ENSMUST00000041776			Rgs8			protein_coding
e11ve16_cond1_1084	chr1	153652936	153653619	+	4.57581	NA	exon (ENSMUST00000041776.11, exon 1 of 7)	protein_coding-exon (ENSMUST00000041776.11, exon 1 of 7)	252	ENSMUST00000041776.11	ENSMUSG00000042671	ENSMUST00000041776			Rgs8			protein_coding
e11ve16_cond1_1085	chr1	154180579	154180949	+	4.08262	NA	Intergenic	Intergenic	-20423	ENSMUST00000086195.6	ENSMUSG00000066797	ENSMUST00000086195			Zfp648			protein_coding
e11ve16_cond1_1086	chr1	154723242	154723904	+	5.09943	NA	intron (ENSMUST00000188321.1, intron 2 of 3)	protein_coding-intron (ENSMUST00000004214.14, intron 1 of 46)	2347	ENSMUST00000004214.14	ENSMUSG00000004110	ENSMUST00000186256			Cacna1e			protein_coding
e11ve16_cond1_1087	chr1	154726336	154727254	+	6.32943	NA	promoter-TSS (ENSMUST00000004214.14)	protein_coding-promoter-TSS (ENSMUST00000004214.14)	-439	ENSMUST00000187541.6	ENSMUSG00000004110	ENSMUST00000186256			Cacna1e			protein_coding
e11ve16_cond1_1088	chr1	154817043	154817336	+	4.48386	NA	promoter-TSS (ENSMUST00000188965.6)	protein_coding-promoter-TSS (ENSMUST00000188965.6)	-248	ENSMUST00000238369.1	ENSMUSG00000004110	ENSMUST00000186256			Cacna1e			protein_coding
e11ve16_cond1_1089	chr1	155013872	155014523	+	5.46319	NA	intron (ENSMUST00000190720.1, intron 3 of 3)	lncRNA-intron (ENSMUST00000190720.1, intron 3 of 3)	-17542	ENSMUST00000191584.1	ENSMUSG00000101433	ENSMUST00000191584			Gm29441			processed_pseudogene
e11ve16_cond1_1090	chr1	155030991	155031472	+	3.27081	NA	promoter-TSS (ENSMUST00000191584.1)	processed_pseudogene-promoter-TSS (ENSMUST00000191584.1)	-508	ENSMUST00000191584.1	ENSMUSG00000101433	ENSMUST00000191584			Gm29441			processed_pseudogene
e11ve16_cond1_1091	chr1	155098121	155098327	+	3.68275	NA	exon (ENSMUST00000055322.5, exon 1 of 1)	protein_coding-exon (ENSMUST00000055322.5, exon 1 of 1)	1412	ENSMUST00000055322.5	ENSMUSG00000056708	ENSMUST00000055322			Ier5			protein_coding
e11ve16_cond1_1092	chr1	155108567	155109520	+	13.8012	NA	Intergenic	Intergenic	-9407	ENSMUST00000055322.5	ENSMUSG00000056708	ENSMUST00000055322			Ier5			protein_coding
e11ve16_cond1_1093	chr1	155243950	155245093	+	4.28484	NA	promoter-TSS (ENSMUST00000186156.6)	protein_coding-promoter-TSS (ENSMUST00000186156.6)	-77	ENSMUST00000186156.6	ENSMUSG00000033722	ENSMUST00000187781			BC034090			protein_coding
e11ve16_cond1_1094	chr1	155450395	155450625	+	5.21414	NA	Intergenic	Intergenic	-33095	ENSMUST00000111774.1	ENSMUSG00000026469	ENSMUST00000139925			Xpr1			protein_coding
e11ve16_cond1_1095	chr1	155527356	155528162	+	6.02128	NA	promoter-TSS (ENSMUST00000097531.2)	lncRNA-promoter-TSS (ENSMUST00000097531.2)	-616	ENSMUST00000194133.1	ENSMUSG00000073535	ENSMUST00000097531			Gm5532			lncRNA
e11ve16_cond1_1096	chr1	155728782	155729120	+	4.45692	NA	intron (ENSMUST00000195275.1, intron 1 of 4)	protein_coding-intron (ENSMUST00000027740.13, intron 1 of 5)	13076	ENSMUST00000027740.13	ENSMUSG00000026468	ENSMUST00000195275			Lhx4			protein_coding
e11ve16_cond1_1097	chr1	155736667	155737319	+	5.97626	NA	intron (ENSMUST00000195275.1, intron 1 of 4)	protein_coding-intron (ENSMUST00000027740.13, intron 1 of 5)	5034	ENSMUST00000027740.13	ENSMUSG00000026468	ENSMUST00000195275			Lhx4			protein_coding
e11ve16_cond1_1098	chr1	155740884	155742522	+	6.14933	NA	intron (ENSMUST00000195275.1, intron 1 of 4)	protein_coding-intron (ENSMUST00000027740.13, intron 1 of 5)	324	ENSMUST00000027740.13	ENSMUSG00000026468	ENSMUST00000195275			Lhx4			protein_coding
e11ve16_cond1_1099	chr1	155994566	155994819	+	5.26794	NA	Intergenic	Intergenic	21374	ENSMUST00000193347.1	ENSMUSG00000102833	ENSMUST00000193347			Gm9694			TEC
e11ve16_cond1_1100	chr1	156085370	156086224	+	4.33854	NA	intron (ENSMUST00000015628.3, intron 2 of 4)	protein_coding-intron (ENSMUST00000015628.3, intron 2 of 4)	22584	ENSMUST00000125371.1	ENSMUSG00000050565	ENSMUST00000131359			Tor1aip2			protein_coding
e11ve16_cond1_1101	chr1	156183629	156184189	+	4.13846	NA	intron (ENSMUST00000015628.3, intron 1 of 4)	protein_coding-intron (ENSMUST00000015628.3, intron 1 of 4)	21117	ENSMUST00000015628.3	ENSMUSG00000015484	ENSMUST00000015628			Fam163a			protein_coding
e11ve16_cond1_1102	chr1	156204225	156205017	+	3.91606	NA	intron (ENSMUST00000015628.3, intron 1 of 4)	protein_coding-intron (ENSMUST00000015628.3, intron 1 of 4)	405	ENSMUST00000015628.3	ENSMUSG00000015484	ENSMUST00000015628			Fam163a			protein_coding
e11ve16_cond1_1103	chr1	156205151	156205424	+	4.86515	NA	promoter-TSS (ENSMUST00000015628.3)	protein_coding-promoter-TSS (ENSMUST00000015628.3)	-261	ENSMUST00000015628.3	ENSMUSG00000015484	ENSMUST00000015628			Fam163a			protein_coding
e11ve16_cond1_1104	chr1	156222519	156222757	+	4.6824	NA	Intergenic	Intergenic	4655	ENSMUST00000193704.1	ENSMUSG00000102932	ENSMUST00000193704			Gm38113			processed_pseudogene
e11ve16_cond1_1105	chr1	156473012	156474079	+	7.81868	NA	intron (ENSMUST00000191379.6, intron 1 of 6)	protein_coding-intron (ENSMUST00000187073.1, intron 1 of 3)	652	ENSMUST00000187073.1	ENSMUSG00000026600	ENSMUST00000189661			Soat1			protein_coding
e11ve16_cond1_1106	chr1	156543828	156544618	+	11.9933	NA	Intergenic	Intergenic	-14563	ENSMUST00000173929.7	ENSMUSG00000026596	ENSMUST00000027888			Abl2			protein_coding
e11ve16_cond1_1107	chr1	156648648	156649075	+	3.80187	NA	exon (ENSMUST00000166172.8, exon 13 of 13)	protein_coding-exon (ENSMUST00000166172.8, exon 13 of 13)	9597	ENSMUST00000154353.1	ENSMUSG00000060519	ENSMUST00000152604			Tor3a			protein_coding
e11ve16_cond1_1108	chr1	156787204	156788007	+	6.68275	NA	Intergenic	Intergenic	-5907	ENSMUST00000121352.1	ENSMUSG00000046057	ENSMUST00000121352			Gm15428			processed_pseudogene
e11ve16_cond1_1109	chr1	156938988	156939394	+	3.69816	NA	promoter-TSS (ENSMUST00000186765.1)	lncRNA-promoter-TSS (ENSMUST00000186765.1)	-57	ENSMUST00000190762.6	ENSMUSG00000026594	ENSMUST00000190648			Ralgps2			protein_coding
e11ve16_cond1_1110	chr1	157048088	157049328	+	7.66076	NA	intron (ENSMUST00000190681.1, intron 1 of 2)	lncRNA-intron (ENSMUST00000190681.1, intron 1 of 2)	5161	ENSMUST00000193527.1	ENSMUSG00000103325	ENSMUST00000193527			Gm10531			TEC
e11ve16_cond1_1111	chr1	157086347	157086966	+	5.25712	NA	Intergenic	Intergenic	21732	ENSMUST00000119526.1	ENSMUSG00000026592	ENSMUST00000027884			Tex35			protein_coding
e11ve16_cond1_1112	chr1	157181264	157181493	+	5.66843	NA	promoter-TSS (ENSMUST00000128538.1)	protein_coding-promoter-TSS (ENSMUST00000128538.1)	63	ENSMUST00000128538.1	ENSMUSG00000070565	ENSMUST00000143080			Rasal2			protein_coding
e11ve16_cond1_1113	chr1	157513030	157513285	+	3.16029	NA	intron (ENSMUST00000086130.8, intron 2 of 27)	protein_coding-intron (ENSMUST00000027881.14, intron 1 of 26)	-1436	ENSMUST00000135147.2	ENSMUSG00000087093	ENSMUST00000135147			Gm15486			lncRNA
e11ve16_cond1_1114	chr1	158355328	158355573	+	6.00321	NA	exon (ENSMUST00000192709.1, exon 1 of 1)	protein_coding-exon (ENSMUST00000192709.1, exon 1 of 1)	779	ENSMUST00000195271.4	ENSMUSG00000004031	ENSMUST00000195271			Brinp2			protein_coding
e11ve16_cond1_1115	chr1	158362252	158363321	+	12.0045	NA	exon (ENSMUST00000046110.15, exon 1 of 23)	protein_coding-exon (ENSMUST00000046110.15, exon 1 of 23)	236	ENSMUST00000195311.5	ENSMUSG00000026587	ENSMUST00000170718			Astn1			protein_coding
e11ve16_cond1_1116	chr1	158424563	158424922	+	4.29621	NA	intron (ENSMUST00000195311.5, intron 1 of 21)	protein_coding-intron (ENSMUST00000046110.15, intron 1 of 22)	48806	ENSMUST00000193534.1	ENSMUSG00000103762	ENSMUST00000193534			Gm37861			TEC
e11ve16_cond1_1117	chr1	158501178	158501751	+	9.8262	NA	intron (ENSMUST00000192868.1, intron 1 of 3)	protein_coding-intron (ENSMUST00000046110.15, intron 2 of 22)	-4161	ENSMUST00000093595.2	ENSMUSG00000070103	ENSMUST00000093595			Mir488			miRNA
e11ve16_cond1_1118	chr1	158960262	158960477	+	6.38008	NA	promoter-TSS (ENSMUST00000177789.1)	protein_coding-promoter-TSS (ENSMUST00000177789.1)	12	ENSMUST00000177789.1	ENSMUSG00000073530	ENSMUST00000177789			Pappa2			protein_coding
e11ve16_cond1_1119	chr1	158960708	158960917	+	4.35413	NA	promoter-TSS (ENSMUST00000177789.1)	protein_coding-promoter-TSS (ENSMUST00000177789.1)	-431	ENSMUST00000177789.1	ENSMUSG00000073530	ENSMUST00000177789			Pappa2			protein_coding
e11ve16_cond1_1120	chr1	159552795	159553371	+	5.00311	NA	intron (ENSMUST00000195199.1, intron 1 of 1)	protein_coding-intron (ENSMUST00000192069.5, intron 1 of 22)	29242	ENSMUST00000195199.1	ENSMUSG00000015829	ENSMUST00000192069			Tnr			protein_coding
e11ve16_cond1_1121	chr1	159650676	159650877	+	3.60222	NA	intron (ENSMUST00000097514.7, intron 1 of 1)	lncRNA-intron (ENSMUST00000097514.7, intron 1 of 1)	-30886	ENSMUST00000194909.1	ENSMUSG00000073528	ENSMUST00000097514			Gm10530			lncRNA
e11ve16_cond1_1122	chr1	159724931	159725541	+	3.78463	NA	intron (ENSMUST00000195199.1, intron 1 of 1)	protein_coding-intron (ENSMUST00000192069.5, intron 1 of 22)	-12274	ENSMUST00000111669.8	ENSMUSG00000015829	ENSMUST00000192069			Tnr			protein_coding
e11ve16_cond1_1123	chr1	159740919	159741278	+	4.21843	NA	intron (ENSMUST00000192069.5, intron 2 of 22)	protein_coding-intron (ENSMUST00000111669.8, intron 1 of 21)	3588	ENSMUST00000111669.8	ENSMUSG00000015829	ENSMUST00000192069			Tnr			protein_coding
e11ve16_cond1_1124	chr1	159834865	159835282	+	3.98407	NA	intron (ENSMUST00000193325.1, intron 1 of 1)	protein_coding-intron (ENSMUST00000111669.8, intron 1 of 21)	-15324	ENSMUST00000192457.1	ENSMUSG00000015829	ENSMUST00000192069			Tnr			protein_coding
e11ve16_cond1_1125	chr1	159983581	159984458	+	4.51368	NA	promoter-TSS (ENSMUST00000157520.1)	snoRNA-promoter-TSS (ENSMUST00000157520.1)	-414	ENSMUST00000157520.1	ENSMUSG00000088145	ENSMUST00000157520			Gm24719			snoRNA
e11ve16_cond1_1126	chr1	160211821	160212081	+	3.58962	NA	promoter-TSS (ENSMUST00000193962.1)	TEC-promoter-TSS (ENSMUST00000193962.1)	775	ENSMUST00000194167.1	ENSMUSG00000014226	ENSMUST00000194167			Cacybp			protein_coding
e11ve16_cond1_1127	chr1	160242347	160243120	+	5.7137	NA	intron (ENSMUST00000193185.5, intron 3 of 6)	protein_coding-intron (ENSMUST00000028052.11, intron 4 of 8)	5265	ENSMUST00000194623.1	ENSMUSG00000026721	ENSMUST00000193729			Rabgap1l			protein_coding
e11ve16_cond1_1128	chr1	160290007	160290249	+	5.38359	NA	TTS (ENSMUST00000195114.1)	protein_coding-TTS (ENSMUST00000195114.1)	-2603	ENSMUST00000193115.1	ENSMUSG00000026721	ENSMUST00000193729			Rabgap1l			protein_coding
e11ve16_cond1_1129	chr1	160980496	160980875	+	7.60019	NA	exon (ENSMUST00000193477.1, exon 1 of 1)	protein_coding-exon (ENSMUST00000193477.1, exon 1 of 1)	1997	ENSMUST00000195760.1	ENSMUSG00000026715	ENSMUST00000193477			Serpinc1			protein_coding
e11ve16_cond1_1130	chr1	161039555	161040877	+	20.0609	NA	promoter-TSS (ENSMUST00000195700.1)	lncRNA-promoter-TSS (ENSMUST00000195700.1)	-404	ENSMUST00000195700.1	ENSMUSG00000102864	ENSMUST00000195700			Gm37634			lncRNA
e11ve16_cond1_1131	chr1	161142775	161143040	+	4.06552	NA	intron (ENSMUST00000192384.5, intron 1 of 4)	protein_coding-intron (ENSMUST00000052245.8, intron 1 of 5)	140	ENSMUST00000052245.8	ENSMUSG00000044835	ENSMUST00000125018			Ankrd45			protein_coding
e11ve16_cond1_1132	chr1	161249631	161249830	+	3.86925	NA	exon (ENSMUST00000130867.1, exon 2 of 2)	protein_coding-exon (ENSMUST00000130867.1, exon 2 of 2)	824	ENSMUST00000139387.7	ENSMUSG00000026701	ENSMUST00000192639			Prdx6			protein_coding
e11ve16_cond1_1133	chr1	161962182	161962383	+	3.6825	NA	intron (ENSMUST00000141397.1, intron 3 of 6)	protein_coding-intron (ENSMUST00000141397.1, intron 3 of 6)	6866	ENSMUST00000141397.1	ENSMUSG00000086277	ENSMUST00000162676			4930558K02Rik			protein_coding
e11ve16_cond1_1134	chr1	161962667	161962952	+	4.04935	NA	intron (ENSMUST00000141397.1, intron 3 of 6)	protein_coding-intron (ENSMUST00000141397.1, intron 3 of 6)	6339	ENSMUST00000141397.1	ENSMUSG00000086277	ENSMUST00000162676			4930558K02Rik			protein_coding
e11ve16_cond1_1135	chr1	162015015	162015431	+	4.36458	NA	intron (ENSMUST00000086074.11, intron 18 of 20)	protein_coding-intron (ENSMUST00000070330.13, intron 17 of 19)	10051	ENSMUST00000160555.1	ENSMUSG00000090260	ENSMUST00000160555			2810442N19Rik			lncRNA
e11ve16_cond1_1136	chr1	162476876	162477117	+	3.38527	NA	promoter-TSS (ENSMUST00000159707.1)	TEC-promoter-TSS (ENSMUST00000159707.1)	-684	ENSMUST00000159707.1	ENSMUSG00000066752	ENSMUST00000159707			Gm10176			TEC
e11ve16_cond1_1137	chr1	162749407	162749729	+	3.83849	NA	Intergenic	Intergenic	-9012	ENSMUST00000182660.7	ENSMUSG00000040225	ENSMUST00000182448			Prrc2c			protein_coding
e11ve16_cond1_1138	chr1	162749850	162750265	+	4.79786	NA	Intergenic	Intergenic	-9501	ENSMUST00000182660.7	ENSMUSG00000040225	ENSMUST00000182448			Prrc2c			protein_coding
e11ve16_cond1_1139	chr1	162831987	162832374	+	3.32898	NA	exon (ENSMUST00000193766.1, exon 1 of 1)	protein_coding-exon (ENSMUST00000193766.1, exon 1 of 1)	-1707	ENSMUST00000136120.1	ENSMUSG00000040181	ENSMUST00000131058			Fmo1			protein_coding
e11ve16_cond1_1140	chr1	163208778	163208991	+	3.4346	NA	Intergenic	Intergenic	-71472	ENSMUST00000172793.1	ENSMUSG00000092188	ENSMUST00000172793			Gm20471			lncRNA
e11ve16_cond1_1141	chr1	163312197	163312613	+	6.40073	NA	exon (ENSMUST00000027878.13, exon 1 of 4)	protein_coding-exon (ENSMUST00000027878.13, exon 1 of 4)	1263	ENSMUST00000174397.2	ENSMUSG00000026586	ENSMUST00000183691			Prrx1			protein_coding
e11ve16_cond1_1142	chr1	163515490	163515876	+	5.17346	NA	Intergenic	Intergenic	-91694	ENSMUST00000185992.1	ENSMUSG00000101869	ENSMUST00000185992			Gm29500			lncRNA
e11ve16_cond1_1143	chr1	163657114	163658022	+	9.4319	NA	Intergenic	Intergenic	33775	ENSMUST00000191040.1	ENSMUSG00000102117	ENSMUST00000191040			Rpsa-ps1			processed_pseudogene
e11ve16_cond1_1144	chr1	163843768	163844060	+	9.73765	NA	intron (ENSMUST00000027877.6, intron 10 of 19)	protein_coding-intron (ENSMUST00000027877.6, intron 10 of 19)	64331	ENSMUST00000027877.6	ENSMUSG00000026585	ENSMUST00000027877			Kifap3			protein_coding
e11ve16_cond1_1145	chr1	163871813	163872079	+	5.98449	NA	intron (ENSMUST00000077642.11, intron 17 of 20)	protein_coding-intron (ENSMUST00000027877.6, intron 17 of 19)	-57154	ENSMUST00000161908.7	ENSMUSG00000026584	ENSMUST00000170359			Scyl3			protein_coding
e11ve16_cond1_1146	chr1	164152028	164152265	+	3.71073	NA	promoter-TSS (ENSMUST00000133341.2)	lncRNA-promoter-TSS (ENSMUST00000133341.2)	71	ENSMUST00000133341.2	ENSMUSG00000086593	ENSMUST00000133341			Gm16548			lncRNA
e11ve16_cond1_1147	chr1	164235081	164235675	+	4.23447	NA	Intergenic	Intergenic	-13668	ENSMUST00000044021.11	ENSMUSG00000040918	ENSMUST00000169394			Slc19a2			protein_coding
e11ve16_cond1_1148	chr1	164249978	164250265	+	4.36374	NA	intron (ENSMUST00000169394.1, intron 1 of 4)	protein_coding-intron (ENSMUST00000044021.11, intron 1 of 5)	868	ENSMUST00000169394.1	ENSMUSG00000040918	ENSMUST00000169394			Slc19a2			protein_coding
e11ve16_cond1_1149	chr1	164535751	164536030	+	5.69048	NA	Intergenic	Intergenic	32581	ENSMUST00000181831.2	ENSMUSG00000097281	ENSMUST00000181831			Gm26685			lncRNA
e11ve16_cond1_1150	chr1	164634999	164635878	+	8.85108	NA	intron (ENSMUST00000194406.1, intron 2 of 4)	lncRNA-intron (ENSMUST00000194406.1, intron 2 of 4)	3681	ENSMUST00000194406.1	ENSMUSG00000103383	ENSMUST00000194406			Gm37754			lncRNA
e11ve16_cond1_1151	chr1	164797353	164797558	+	4.41676	NA	intron (ENSMUST00000027861.5, intron 1 of 3)	protein_coding-intron (ENSMUST00000027861.5, intron 1 of 3)	811	ENSMUST00000027861.5	ENSMUSG00000026574	ENSMUST00000027861			Dpt			protein_coding
e11ve16_cond1_1152	chr1	165018406	165018874	+	3.84383	NA	Intergenic	Intergenic	-5705	ENSMUST00000116911.1	ENSMUSG00000080561	ENSMUST00000116911			Gm26042			miRNA
e11ve16_cond1_1153	chr1	165039585	165039966	+	6.93585	NA	Intergenic	Intergenic	15430	ENSMUST00000116911.1	ENSMUSG00000080561	ENSMUST00000116911			Gm26042			miRNA
e11ve16_cond1_1154	chr1	165143081	165143859	+	6.20834	NA	intron (ENSMUST00000160350.1, intron 4 of 4)	protein_coding-intron (ENSMUST00000027859.11, intron 5 of 7)	5479	ENSMUST00000162550.1	ENSMUSG00000089967	ENSMUST00000162550			Gm16550			processed_pseudogene
e11ve16_cond1_1155	chr1	165183083	165183409	+	4.22919	NA	intron (ENSMUST00000192565.1, intron 7 of 8)	protein_coding-intron (ENSMUST00000043338.9, intron 6 of 7)	11071	ENSMUST00000192565.1	ENSMUSG00000040848	ENSMUST00000192185			Sft2d2			protein_coding
e11ve16_cond1_1156	chr1	165236009	165236271	+	4.05194	NA	intron (ENSMUST00000192436.5, intron 1 of 7)	protein_coding-intron (ENSMUST00000043235.7, intron 1 of 6)	373	ENSMUST00000195248.2	ENSMUSG00000040843	ENSMUST00000192726			Tiprl			protein_coding
e11ve16_cond1_1157	chr1	165282522	165283071	+	7.04466	NA	Intergenic	Intergenic	-12993	ENSMUST00000178700.7	ENSMUSG00000040836	ENSMUST00000111450			Gpr161			protein_coding
e11ve16_cond1_1158	chr1	165617885	165618228	+	6.01109	NA	intron (ENSMUST00000111435.8, intron 1 of 5)	protein_coding-intron (ENSMUST00000068705.12, intron 1 of 4)	-4077	ENSMUST00000192848.5	ENSMUSG00000026566	ENSMUST00000194829			Mpzl1			protein_coding
e11ve16_cond1_1159	chr1	165641553	165642393	+	7.94901	NA	Intergenic	Intergenic	2715	ENSMUST00000192126.1	ENSMUSG00000104517	ENSMUST00000192126			Gm18407			processed_pseudogene
e11ve16_cond1_1160	chr1	165780905	165781125	+	3.86043	NA	promoter-TSS (ENSMUST00000159138.1)	lncRNA-promoter-TSS (ENSMUST00000159138.1)	-60	ENSMUST00000159138.1	ENSMUSG00000089829	ENSMUST00000193086			Gm16565			lncRNA
e11ve16_cond1_1161	chr1	165816845	165818152	+	5.29357	NA	intron (ENSMUST00000178336.7, intron 1 of 8)	protein_coding-intron (ENSMUST00000005907.11, intron 1 of 7)	-7756	ENSMUST00000178130.1	ENSMUSG00000094394	ENSMUST00000178130			Gm23402			snRNA
e11ve16_cond1_1162	chr1	165864331	165864532	+	3.91106	NA	promoter-TSS (ENSMUST00000162411.2)	protein_coding-promoter-TSS (ENSMUST00000162411.2)	-224	ENSMUST00000162411.2	ENSMUSG00000005763	ENSMUST00000187313			Cd247			protein_coding
e11ve16_cond1_1163	chr1	166023915	166024116	+	4.83594	NA	intron (ENSMUST00000181378.2, intron 1 of 1)	lncRNA-intron (ENSMUST00000181378.2, intron 1 of 1)	19676	ENSMUST00000195801.1	ENSMUSG00000102890	ENSMUST00000195801			Gm7626			processed_pseudogene
e11ve16_cond1_1164	chr1	166131868	166132583	+	7.14896	NA	intron (ENSMUST00000166159.1, intron 1 of 2)	protein_coding-intron (ENSMUST00000027847.6, intron 1 of 3)	1758	ENSMUST00000166860.1	ENSMUSG00000000544	ENSMUST00000166860			Gpa33			protein_coding
e11ve16_cond1_1165	chr1	166254082	166254350	+	3.96999	NA	promoter-TSS (ENSMUST00000111416.6)	protein_coding-promoter-TSS (ENSMUST00000111416.6)	23	ENSMUST00000192732.5	ENSMUSG00000040612	ENSMUST00000192426			Ildr2			protein_coding
e11ve16_cond1_1166	chr1	166280174	166281059	+	4.00582	NA	intron (ENSMUST00000192426.5, intron 3 of 3)	protein_coding-intron (ENSMUST00000111416.6, intron 3 of 9)	26423	ENSMUST00000192732.5	ENSMUSG00000040612	ENSMUST00000192426			Ildr2			protein_coding
e11ve16_cond1_1167	chr1	166282371	166282788	+	4.53999	NA	intron (ENSMUST00000192426.5, intron 3 of 3)	protein_coding-intron (ENSMUST00000111416.6, intron 3 of 9)	27006	ENSMUST00000168347.1	ENSMUSG00000091393	ENSMUST00000168347			5330438I03Rik			lncRNA
e11ve16_cond1_1168	chr1	166283047	166283268	+	3.88133	NA	intron (ENSMUST00000192426.5, intron 3 of 3)	protein_coding-intron (ENSMUST00000111416.6, intron 3 of 9)	26428	ENSMUST00000168347.1	ENSMUSG00000091393	ENSMUST00000168347			5330438I03Rik			lncRNA
e11ve16_cond1_1169	chr1	167002203	167002692	+	7.94474	NA	intron (ENSMUST00000165874.7, intron 1 of 2)	protein_coding-intron (ENSMUST00000122929.1, intron 1 of 2)	858	ENSMUST00000128373.1	ENSMUSG00000060568	ENSMUST00000122929			Fam78b			protein_coding
e11ve16_cond1_1170	chr1	167021936	167022297	+	5.84441	NA	intron (ENSMUST00000165874.7, intron 1 of 2)	protein_coding-intron (ENSMUST00000122929.1, intron 1 of 2)	20527	ENSMUST00000128373.1	ENSMUSG00000060568	ENSMUST00000122929			Fam78b			protein_coding
e11ve16_cond1_1171	chr1	167116628	167117347	+	7.56975	NA	Intergenic	Intergenic	-24168	ENSMUST00000192761.1	ENSMUSG00000102870	ENSMUST00000192761			Gm17868			unprocessed_pseudogene
e11ve16_cond1_1172	chr1	167187742	167187962	+	5.21284	NA	Intergenic	Intergenic	-1464	ENSMUST00000192124.1	ENSMUSG00000103333	ENSMUST00000192124			Gm37994			processed_pseudogene
e11ve16_cond1_1173	chr1	167220706	167221376	+	6.73186	NA	Intergenic	Intergenic	15794	ENSMUST00000195443.5	ENSMUSG00000026558	ENSMUST00000191745			Uck2			protein_coding
e11ve16_cond1_1174	chr1	167256217	167256768	+	5.19958	NA	intron (ENSMUST00000053686.8, intron 1 of 6)	protein_coding-intron (ENSMUST00000053686.8, intron 1 of 6)	-13334	ENSMUST00000027839.13	ENSMUSG00000026558	ENSMUST00000191745			Uck2			protein_coding
e11ve16_cond1_1175	chr1	167270702	167271396	+	4.81306	NA	intron (ENSMUST00000193579.1, intron 1 of 2)	protein_coding-intron (ENSMUST00000053686.8, intron 1 of 6)	13552	ENSMUST00000192269.2	ENSMUSG00000026558	ENSMUST00000191745			Uck2			protein_coding
e11ve16_cond1_1176	chr1	167289819	167290125	+	5.21002	NA	promoter-TSS (ENSMUST00000184939.1)	miRNA-promoter-TSS (ENSMUST00000184939.1)	-153	ENSMUST00000184939.1	ENSMUSG00000098379	ENSMUST00000184939			Mir6347			miRNA
e11ve16_cond1_1177	chr1	167369863	167370126	+	3.29815	NA	Intergenic	Intergenic	5828	ENSMUST00000191715.1	ENSMUSG00000026687	ENSMUST00000191715			Aldh9a1			protein_coding
e11ve16_cond1_1178	chr1	167549771	167550461	+	5.62246	NA	Intergenic	Intergenic	-48268	ENSMUST00000015987.9	ENSMUSG00000015843	ENSMUST00000111384			Rxrg			protein_coding
e11ve16_cond1_1179	chr1	167584375	167584659	+	3.50275	NA	Intergenic	Intergenic	-13867	ENSMUST00000015987.9	ENSMUSG00000015843	ENSMUST00000111384			Rxrg			protein_coding
e11ve16_cond1_1180	chr1	167761865	167762553	+	3.77513	NA	intron (ENSMUST00000028003.8, intron 2 of 7)	protein_coding-intron (ENSMUST00000028003.8, intron 2 of 7)	72652	ENSMUST00000028003.8	ENSMUSG00000026686	ENSMUST00000028003			Lmx1a			protein_coding
e11ve16_cond1_1181	chr1	167788722	167789104	+	4.36134	NA	intron (ENSMUST00000028003.8, intron 2 of 7)	protein_coding-intron (ENSMUST00000028003.8, intron 2 of 7)	99356	ENSMUST00000028003.8	ENSMUSG00000026686	ENSMUST00000028003			Lmx1a			protein_coding
e11ve16_cond1_1182	chr1	167789269	167789564	+	4.63659	NA	intron (ENSMUST00000028003.8, intron 2 of 7)	protein_coding-intron (ENSMUST00000028003.8, intron 2 of 7)	99859	ENSMUST00000028003.8	ENSMUSG00000026686	ENSMUST00000028003			Lmx1a			protein_coding
e11ve16_cond1_1183	chr1	167948090	167948681	+	4.44305	NA	Intergenic	Intergenic	-55754	ENSMUST00000177351.2	ENSMUSG00000093538	ENSMUST00000177351			Gm20711			lncRNA
e11ve16_cond1_1184	chr1	168354625	168355870	+	11.1283	NA	intron (ENSMUST00000176482.1, intron 2 of 2)	protein_coding-intron (ENSMUST00000176482.1, intron 2 of 2)	-4439	ENSMUST00000193594.1	ENSMUSG00000102594	ENSMUST00000193594			Gm38381			TEC
e11ve16_cond1_1185	chr1	168364772	168365159	+	10.5839	NA	intron (ENSMUST00000176482.1, intron 2 of 2)	protein_coding-intron (ENSMUST00000176482.1, intron 2 of 2)	-14157	ENSMUST00000193594.1	ENSMUSG00000102594	ENSMUST00000193594			Gm38381			TEC
e11ve16_cond1_1186	chr1	168383090	168383396	+	4.33107	NA	intron (ENSMUST00000176482.1, intron 2 of 2)	protein_coding-intron (ENSMUST00000176482.1, intron 2 of 2)	-32435	ENSMUST00000193594.1	ENSMUSG00000102594	ENSMUST00000193594			Gm38381			TEC
e11ve16_cond1_1187	chr1	168405758	168406084	+	7.38922	NA	intron (ENSMUST00000176482.1, intron 2 of 2)	protein_coding-intron (ENSMUST00000176482.1, intron 2 of 2)	25583	ENSMUST00000064438.10	ENSMUSG00000052534	ENSMUST00000176791			Pbx1			protein_coding
e11ve16_cond1_1188	chr1	168410375	168411223	+	5.29157	NA	intron (ENSMUST00000176482.1, intron 2 of 2)	protein_coding-intron (ENSMUST00000176482.1, intron 2 of 2)	20705	ENSMUST00000064438.10	ENSMUSG00000052534	ENSMUST00000176791			Pbx1			protein_coding
e11ve16_cond1_1189	chr1	168417152	168417747	+	7.39073	NA	intron (ENSMUST00000176482.1, intron 2 of 2)	protein_coding-intron (ENSMUST00000176482.1, intron 2 of 2)	14055	ENSMUST00000064438.10	ENSMUSG00000052534	ENSMUST00000176791			Pbx1			protein_coding
e11ve16_cond1_1190	chr1	169234927	169235355	+	4.54349	NA	Intergenic	Intergenic	112491	ENSMUST00000192576.1	ENSMUSG00000103530	ENSMUST00000192576			Gm37839			lncRNA
e11ve16_cond1_1191	chr1	169284211	169284427	+	3.45819	NA	Intergenic	Intergenic	63313	ENSMUST00000192576.1	ENSMUSG00000103530	ENSMUST00000192576			Gm37839			lncRNA
e11ve16_cond1_1192	chr1	169918514	169919295	+	4.49628	NA	Intergenic	Intergenic	-9744	ENSMUST00000094348.3	ENSMUSG00000070532	ENSMUST00000175731			Ccdc190			protein_coding
e11ve16_cond1_1193	chr1	170644638	170645037	+	3.78966	NA	exon (ENSMUST00000046792.8, exon 1 of 8)	protein_coding-exon (ENSMUST00000046792.8, exon 1 of 8)	305	ENSMUST00000046792.8	ENSMUSG00000038463	ENSMUST00000046792			Olfml2b			protein_coding
e11ve16_cond1_1194	chr1	170867740	170868594	+	4.2393	NA	promoter-TSS (ENSMUST00000027974.6)	protein_coding-promoter-TSS (ENSMUST00000027974.6)	-396	ENSMUST00000027974.6	ENSMUSG00000026663	ENSMUST00000182787			Atf6			protein_coding
e11ve16_cond1_1195	chr1	170907415	170907638	+	3.25652	NA	exon (ENSMUST00000094337.1, exon 6 of 6)	protein_coding-exon (ENSMUST00000094337.1, exon 6 of 6)	5415	ENSMUST00000094337.1	ENSMUSG00000070524	ENSMUST00000094337			Fcrlb			protein_coding
e11ve16_cond1_1196	chr1	170907808	170908250	+	4.29114	NA	exon (ENSMUST00000094337.1, exon 5 of 6)	protein_coding-exon (ENSMUST00000094337.1, exon 5 of 6)	4912	ENSMUST00000094337.1	ENSMUSG00000070524	ENSMUST00000094337			Fcrlb			protein_coding
e11ve16_cond1_1197	chr1	170908454	170908905	+	4.05135	NA	exon (ENSMUST00000094337.1, exon 4 of 6)	protein_coding-exon (ENSMUST00000094337.1, exon 4 of 6)	4262	ENSMUST00000094337.1	ENSMUSG00000070524	ENSMUST00000094337			Fcrlb			protein_coding
e11ve16_cond1_1198	chr1	170913702	170913964	+	5.51295	NA	promoter-TSS (ENSMUST00000094337.1)	protein_coding-promoter-TSS (ENSMUST00000094337.1)	-892	ENSMUST00000094337.1	ENSMUSG00000070524	ENSMUST00000094337			Fcrlb			protein_coding
e11ve16_cond1_1199	chr1	171032845	171034405	+	6.08879	NA	Intergenic	Intergenic	5660	ENSMUST00000083971.1	ENSMUSG00000065905	ENSMUST00000083971			Gm26110			snRNA
e11ve16_cond1_1200	chr1	171036839	171037367	+	8.53576	NA	Intergenic	Intergenic	9138	ENSMUST00000083971.1	ENSMUSG00000065905	ENSMUST00000083971			Gm26110			snRNA
e11ve16_cond1_1201	chr1	171037778	171039325	+	4.86052	NA	Intergenic	Intergenic	10586	ENSMUST00000083971.1	ENSMUSG00000065905	ENSMUST00000083971			Gm26110			snRNA
e11ve16_cond1_1202	chr1	171045044	171045463	+	3.95776	NA	Intergenic	Intergenic	12801	ENSMUST00000168817.1	ENSMUSG00000059498	ENSMUST00000168817			Fcgr3			protein_coding
e11ve16_cond1_1203	chr1	171101602	171103528	+	8.54752	NA	Intergenic	Intergenic	-11353	ENSMUST00000129651.7	ENSMUSG00000026649	ENSMUST00000027959			Cfap126			protein_coding
e11ve16_cond1_1204	chr1	171110895	171111113	+	5.75546	NA	Intergenic	Intergenic	-2914	ENSMUST00000129651.7	ENSMUSG00000026649	ENSMUST00000027959			Cfap126			protein_coding
e11ve16_cond1_1205	chr1	171195170	171196328	+	6.26358	NA	intron (ENSMUST00000111332.1, intron 1 of 2)	protein_coding-intron (ENSMUST00000111332.1, intron 1 of 2)	519	ENSMUST00000111332.1	ENSMUSG00000038370	ENSMUST00000111332			Pcp4l1			protein_coding
e11ve16_cond1_1206	chr1	171319766	171320290	+	7.16644	NA	TTS (ENSMUST00000192658.1)	lncRNA-TTS (ENSMUST00000192658.1)	6149	ENSMUST00000192658.1	ENSMUSG00000103983	ENSMUST00000192658			Gm20045			lncRNA
e11ve16_cond1_1207	chr1	171321998	171322298	+	3.5904	NA	exon (ENSMUST00000192658.1, exon 1 of 1)	lncRNA-exon (ENSMUST00000192658.1, exon 1 of 1)	4029	ENSMUST00000192658.1	ENSMUSG00000103983	ENSMUST00000192658			Gm20045			lncRNA
e11ve16_cond1_1208	chr1	171387049	171387386	+	4.29876	NA	exon (ENSMUST00000006578.9, exon 9 of 9)	protein_coding-exon (ENSMUST00000006578.9, exon 9 of 9)	-1737	ENSMUST00000056449.8	ENSMUSG00000048865	ENSMUST00000131607			Arhgap30			protein_coding
e11ve16_cond1_1209	chr1	171411849	171412257	+	3.96392	NA	intron (ENSMUST00000167546.1, intron 1 of 9)	protein_coding-intron (ENSMUST00000167546.1, intron 1 of 9)	372	ENSMUST00000167546.1	ENSMUSG00000026641	ENSMUST00000001284			Usf1			protein_coding
e11ve16_cond1_1210	chr1	171438159	171438532	+	5.65292	NA	intron (ENSMUST00000144497.1, intron 1 of 2)	protein_coding-intron (ENSMUST00000043839.4, intron 1 of 9)	766	ENSMUST00000144497.1	ENSMUSG00000038235	ENSMUST00000144497			F11r			protein_coding
e11ve16_cond1_1211	chr1	171566455	171566824	+	3.72348	NA	intron (ENSMUST00000194797.1, intron 1 of 6)	protein_coding-intron (ENSMUST00000004829.12, intron 1 of 8)	7445	ENSMUST00000194170.1	ENSMUSG00000004709	ENSMUST00000195804			Cd244a			protein_coding
e11ve16_cond1_1212	chr1	172016793	172017380	+	6.23198	NA	intron (ENSMUST00000111264.7, intron 1 of 8)	protein_coding-intron (ENSMUST00000027837.12, intron 1 of 7)	-8057	ENSMUST00000148363.1	ENSMUSG00000026556	ENSMUST00000027837			Vangl2			protein_coding
e11ve16_cond1_1213	chr1	172026202	172026986	+	6.90264	NA	exon (ENSMUST00000153662.7, exon 1 of 4)	protein_coding-exon (ENSMUST00000153662.7, exon 1 of 4)	117	ENSMUST00000153662.7	ENSMUSG00000026556	ENSMUST00000027837			Vangl2			protein_coding
e11ve16_cond1_1214	chr1	172081891	172082281	+	3.63563	NA	promoter-TSS (ENSMUST00000027833.11)	protein_coding-promoter-TSS (ENSMUST00000027833.11)	-443	ENSMUST00000135192.7	ENSMUSG00000026553	ENSMUST00000133909			Copa			protein_coding
e11ve16_cond1_1215	chr1	172083419	172083874	+	4.34781	NA	promoter-TSS (ENSMUST00000003550.10)	protein_coding-promoter-TSS (ENSMUST00000003550.10)	814	ENSMUST00000027833.11	ENSMUSG00000026553	ENSMUST00000133909			Copa			protein_coding
e11ve16_cond1_1216	chr1	172126410	172127006	+	5.12602	NA	promoter-TSS (ENSMUST00000075895.8)	protein_coding-promoter-TSS (ENSMUST00000075895.8)	-47	ENSMUST00000075895.8	ENSMUSG00000003464	ENSMUST00000127662			Pex19			protein_coding
e11ve16_cond1_1217	chr1	172200279	172200896	+	5.1149	NA	promoter-TSS (ENSMUST00000125361.1)	protein_coding-promoter-TSS (ENSMUST00000125361.1)	-772	ENSMUST00000125361.1	ENSMUSG00000013698	ENSMUST00000013842			Pea15a			protein_coding
e11ve16_cond1_1218	chr1	172202513	172203770	+	8.66607	NA	intron (ENSMUST00000152432.1, intron 1 of 1)	protein_coding-intron (ENSMUST00000013842.11, intron 1 of 3)	-3326	ENSMUST00000125361.1	ENSMUSG00000013698	ENSMUST00000013842			Pea15a			protein_coding
e11ve16_cond1_1219	chr1	172280971	172281329	+	6.30281	NA	intron (ENSMUST00000085913.10, intron 13 of 22)	protein_coding-intron (ENSMUST00000085913.10, intron 13 of 22)	-4672	ENSMUST00000191781.1	ENSMUSG00000007097	ENSMUST00000131751			Atp1a2			protein_coding
e11ve16_cond1_1220	chr1	172300406	172300735	+	5.90704	NA	intron (ENSMUST00000139528.7, intron 3 of 8)	protein_coding-intron (ENSMUST00000139528.7, intron 3 of 8)	-2506	ENSMUST00000097464.3	ENSMUSG00000007097	ENSMUST00000131751			Atp1a2			protein_coding
e11ve16_cond1_1221	chr1	172317562	172318126	+	12.2017	NA	promoter-TSS (ENSMUST00000150598.1)	protein_coding-promoter-TSS (ENSMUST00000150598.1)	-466	ENSMUST00000194505.1	ENSMUSG00000038034	ENSMUST00000139528			Igsf8			protein_coding
e11ve16_cond1_1222	chr1	172325183	172325912	+	4.06349	NA	exon (ENSMUST00000194860.1, exon 2 of 2)	protein_coding-exon (ENSMUST00000194860.1, exon 2 of 2)	2553	ENSMUST00000192957.1	ENSMUSG00000102413	ENSMUST00000192957			Gm36937			lncRNA
e11ve16_cond1_1223	chr1	172350044	172350971	+	4.42059	NA	intron (ENSMUST00000056136.3, intron 1 of 1)	protein_coding-intron (ENSMUST00000056136.3, intron 1 of 1)	9297	ENSMUST00000056136.3	ENSMUSG00000044708	ENSMUST00000056136			Kcnj10			protein_coding
e11ve16_cond1_1224	chr1	172368495	172368709	+	5.18888	NA	intron (ENSMUST00000056136.3, intron 1 of 1)	protein_coding-intron (ENSMUST00000056136.3, intron 1 of 1)	-7944	ENSMUST00000052455.3	ENSMUSG00000050229	ENSMUST00000052455			Pigm			protein_coding
e11ve16_cond1_1225	chr1	172482256	172483002	+	5.46457	NA	intron (ENSMUST00000111235.7, intron 1 of 20)	protein_coding-intron (ENSMUST00000052629.12, intron 1 of 20)	315	ENSMUST00000111235.7	ENSMUSG00000037995	ENSMUST00000125258			Igsf9			protein_coding
e11ve16_cond1_1226	chr1	172509602	172510112	+	6.53559	NA	Intergenic	Intergenic	-3392	ENSMUST00000195877.1	ENSMUSG00000104351	ENSMUST00000195877			Gm37125			TEC
e11ve16_cond1_1227	chr1	172510816	172511355	+	5.87596	NA	Intergenic	Intergenic	-2164	ENSMUST00000195877.1	ENSMUSG00000104351	ENSMUST00000195877			Gm37125			TEC
e11ve16_cond1_1228	chr1	172532053	172532484	+	4.31464	NA	intron (ENSMUST00000160531.1, intron 4 of 4)	protein_coding-intron (ENSMUST00000085894.11, intron 4 of 11)	-5349	ENSMUST00000160303.1	ENSMUSG00000026546	ENSMUST00000160303			Cfap45			protein_coding
e11ve16_cond1_1229	chr1	172561964	172562683	+	7.47069	NA	intron (ENSMUST00000177086.1, intron 5 of 5)	protein_coding-intron (ENSMUST00000061835.9, intron 6 of 6)	2417	ENSMUST00000177086.1	ENSMUSG00000049598	ENSMUST00000061835			Vsig8			protein_coding
e11ve16_cond1_1230	chr1	172616621	172617113	+	4.22173	NA	Intergenic	Intergenic	-14316	ENSMUST00000094303.5	ENSMUSG00000070504	ENSMUST00000193431			Fcrl6			protein_coding
e11ve16_cond1_1231	chr1	172712267	172712497	+	3.87278	NA	intron (ENSMUST00000194251.1, intron 1 of 1)	protein_coding-intron (ENSMUST00000194251.1, intron 1 of 1)	14326	ENSMUST00000194251.1	ENSMUSG00000037942	ENSMUST00000194251			Crp			protein_coding
e11ve16_cond1_1232	chr1	172756789	172758088	+	10.9086	NA	intron (ENSMUST00000194251.1, intron 1 of 1)	protein_coding-intron (ENSMUST00000194251.1, intron 1 of 1)	-24007	ENSMUST00000193740.1	ENSMUSG00000102430	ENSMUST00000193740			Gm38051			processed_pseudogene
e11ve16_cond1_1233	chr1	172990004	172990534	+	5.59335	NA	Intergenic	Intergenic	33501	ENSMUST00000038432.6	ENSMUSG00000037924	ENSMUST00000215254			Olfr16			protein_coding
e11ve16_cond1_1234	chr1	173336057	173336394	+	6.29928	NA	TTS (ENSMUST00000136540.1)	protein_coding-TTS (ENSMUST00000136540.1)	-2475	ENSMUST00000194298.1	ENSMUSG00000037872	ENSMUST00000038227			Ackr1			protein_coding
e11ve16_cond1_1235	chr1	173349635	173350968	+	13.0891	NA	promoter-TSS (ENSMUST00000147604.7)	protein_coding-promoter-TSS (ENSMUST00000147604.7)	-578	ENSMUST00000147604.7	ENSMUSG00000037860	ENSMUST00000147604			Aim2			protein_coding
e11ve16_cond1_1236	chr1	173366288	173368480	+	17.0498	NA	intron (ENSMUST00000147604.7, intron 1 of 11)	protein_coding-intron (ENSMUST00000005470.4, intron 1 of 9)	249	ENSMUST00000126963.1	ENSMUSG00000005338	ENSMUST00000005470			Cadm3			protein_coding
e11ve16_cond1_1237	chr1	173405319	173405818	+	9.12645	NA	intron (ENSMUST00000147604.7, intron 2 of 11)	protein_coding-intron (ENSMUST00000147604.7, intron 2 of 11)	-13628	ENSMUST00000174263.1	ENSMUSG00000037860	ENSMUST00000147604			Aim2			protein_coding
e11ve16_cond1_1238	chr1	173981122	173981664	+	4.21813	NA	intron (ENSMUST00000000266.8, intron 1 of 6)	protein_coding-intron (ENSMUST00000000266.8, intron 1 of 6)	1351	ENSMUST00000000266.8	ENSMUSG00000026535	ENSMUST00000000266			Ifi202b			protein_coding
e11ve16_cond1_1239	chr1	174302961	174303589	+	5.27001	NA	Intergenic	Intergenic	-27243	ENSMUST00000027816.4	ENSMUSG00000026531	ENSMUST00000027816			Mptx1			protein_coding
e11ve16_cond1_1240	chr1	174501296	174502999	+	9.58983	NA	exon (ENSMUST00000030039.12, exon 1 of 18)	protein_coding-exon (ENSMUST00000030039.12, exon 1 of 18)	322	ENSMUST00000030039.12	ENSMUSG00000028354	ENSMUST00000191971			Fmn2			protein_coding
e11ve16_cond1_1241	chr1	174522632	174523298	+	4.33939	NA	intron (ENSMUST00000030039.12, intron 1 of 17)	protein_coding-intron (ENSMUST00000030039.12, intron 1 of 17)	-14080	ENSMUST00000191821.1	ENSMUSG00000028354	ENSMUST00000191971			Fmn2			protein_coding
e11ve16_cond1_1242	chr1	174855207	174856762	+	7.90777	NA	intron (ENSMUST00000055294.3, intron 1 of 1)	protein_coding-intron (ENSMUST00000055294.3, intron 1 of 1)	65835	ENSMUST00000055294.3	ENSMUSG00000050069	ENSMUST00000055294			Grem2			protein_coding
e11ve16_cond1_1243	chr1	175239739	175240159	+	5.52141	NA	intron (ENSMUST00000194555.5, intron 3 of 17)	protein_coding-intron (ENSMUST00000027812.10, intron 2 of 15)	140727	ENSMUST00000194955.1	ENSMUSG00000104343	ENSMUST00000194955			5730408A14Rik			TEC
e11ve16_cond1_1244	chr1	175240290	175240722	+	6.25731	NA	intron (ENSMUST00000194555.5, intron 3 of 17)	protein_coding-intron (ENSMUST00000027812.10, intron 2 of 15)	140170	ENSMUST00000194955.1	ENSMUSG00000104343	ENSMUST00000194955			5730408A14Rik			TEC
e11ve16_cond1_1245	chr1	175523102	175523619	+	3.50658	NA	Intergenic	Intergenic	-30860	ENSMUST00000194555.5	ENSMUSG00000026527	ENSMUST00000192203			Rgs7			protein_coding
e11ve16_cond1_1246	chr1	175552708	175553270	+	4.93404	NA	Intergenic	Intergenic	-21320	ENSMUST00000195831.1	ENSMUSG00000103079	ENSMUST00000195831			Gm36307			lncRNA
e11ve16_cond1_1247	chr1	175608094	175608589	+	11.3026	NA	intron (ENSMUST00000027810.13, intron 6 of 9)	protein_coding-intron (ENSMUST00000027810.13, intron 6 of 9)	1372	ENSMUST00000176740.1	ENSMUSG00000026526	ENSMUST00000154956			Fh1			protein_coding
e11ve16_cond1_1248	chr1	175742279	175742797	+	4.06275	NA	intron (ENSMUST00000194087.5, intron 7 of 26)	protein_coding-intron (ENSMUST00000094288.9, intron 8 of 27)	-24500	ENSMUST00000194783.1	ENSMUSG00000026523	ENSMUST00000094288			Wdr64			protein_coding
e11ve16_cond1_1249	chr1	175881378	175881616	+	4.09699	NA	intron (ENSMUST00000194306.5, intron 2 of 6)	protein_coding-intron (ENSMUST00000039725.11, intron 2 of 14)	314	ENSMUST00000193858.1	ENSMUSG00000039748	ENSMUST00000194636			Exo1			protein_coding
e11ve16_cond1_1250	chr1	175913475	175914109	+	7.68893	NA	TTS (ENSMUST00000039725.11)	protein_coding-TTS (ENSMUST00000039725.11)	6223	ENSMUST00000192378.1	ENSMUSG00000039748	ENSMUST00000194636			Exo1			protein_coding
e11ve16_cond1_1251	chr1	176037746	176037961	+	3.18728	NA	intron (ENSMUST00000065967.13, intron 5 of 9)	protein_coding-intron (ENSMUST00000065967.13, intron 5 of 9)	-5130	ENSMUST00000192680.1	ENSMUSG00000104363	ENSMUST00000192680			Gm38081			TEC
e11ve16_cond1_1252	chr1	176082163	176082660	+	5.08088	NA	intron (ENSMUST00000125404.7, intron 2 of 8)	protein_coding-intron (ENSMUST00000065967.13, intron 3 of 9)	-49688	ENSMUST00000192680.1	ENSMUSG00000104363	ENSMUST00000192680			Gm38081			TEC
e11ve16_cond1_1253	chr1	176447258	176447585	+	4.17245	NA	intron (ENSMUST00000194241.1, intron 3 of 3)	lncRNA-intron (ENSMUST00000194241.1, intron 3 of 3)	-73701	ENSMUST00000195389.1	ENSMUSG00000104248	ENSMUST00000195389			Gm38152			TEC
e11ve16_cond1_1254	chr1	176997294	176998350	+	10.4002	NA	promoter-TSS (ENSMUST00000139589.1)	protein_coding-promoter-TSS (ENSMUST00000139589.1)	-187	ENSMUST00000139589.1	ENSMUSG00000026504	ENSMUST00000139589			Sdccag8			protein_coding
e11ve16_cond1_1255	chr1	177040690	177040956	+	3.42995	NA	intron (ENSMUST00000019843.14, intron 11 of 12)	protein_coding-intron (ENSMUST00000019843.14, intron 11 of 12)	-3887	ENSMUST00000192402.1	ENSMUSG00000104391	ENSMUST00000192402			Gm37960			TEC
e11ve16_cond1_1256	chr1	177323033	177323650	+	5.50194	NA	Intergenic	Intergenic	53989	ENSMUST00000195582.1	ENSMUSG00000103633	ENSMUST00000195582			Gm38328			processed_pseudogene
e11ve16_cond1_1257	chr1	177442185	177443011	+	45.2958	NA	promoter-TSS (ENSMUST00000192699.1)	protein_coding-promoter-TSS (ENSMUST00000192699.1)	54	ENSMUST00000194319.1	ENSMUSG00000063659	ENSMUST00000193480			Zbtb18			protein_coding
e11ve16_cond1_1258	chr1	177507916	177508295	+	5.79505	NA	Intergenic	Intergenic	40727	ENSMUST00000193447.1	ENSMUSG00000103043	ENSMUST00000193447			Gm37306			lncRNA
e11ve16_cond1_1259	chr1	177518427	177519157	+	5.51044	NA	Intergenic	Intergenic	51414	ENSMUST00000193447.1	ENSMUSG00000103043	ENSMUST00000193447			Gm37306			lncRNA
e11ve16_cond1_1260	chr1	177737336	177737627	+	3.87271	NA	intron (ENSMUST00000016106.5, intron 2 of 5)	protein_coding-intron (ENSMUST00000016106.5, intron 2 of 5)	7667	ENSMUST00000016106.5	ENSMUSG00000015962	ENSMUST00000016106			1700016C15Rik			protein_coding
e11ve16_cond1_1261	chr1	178319574	178319819	+	5.61795	NA	intron (ENSMUST00000154437.1, intron 1 of 1)	protein_coding-intron (ENSMUST00000027781.6, intron 1 of 3)	566	ENSMUST00000154437.1	ENSMUSG00000026500	ENSMUST00000154437			Cox20			protein_coding
e11ve16_cond1_1262	chr1	178426395	178426758	+	5.39869	NA	intron (ENSMUST00000027775.8, intron 1 of 6)	protein_coding-intron (ENSMUST00000027775.8, intron 1 of 6)	20473	ENSMUST00000027775.8	ENSMUSG00000026495	ENSMUST00000027775			Efcab2			protein_coding
e11ve16_cond1_1263	chr1	178529223	178529553	+	4.04851	NA	exon (ENSMUST00000161017.7, exon 1 of 15)	protein_coding-exon (ENSMUST00000161017.7, exon 1 of 15)	263	ENSMUST00000161017.7	ENSMUSG00000026494	ENSMUST00000193931			Kif26b			protein_coding
e11ve16_cond1_1264	chr1	178529748	178530404	+	4.80567	NA	intron (ENSMUST00000193931.1, intron 1 of 3)	protein_coding-intron (ENSMUST00000161017.7, intron 1 of 14)	951	ENSMUST00000161017.7	ENSMUSG00000026494	ENSMUST00000193931			Kif26b			protein_coding
e11ve16_cond1_1265	chr1	178530930	178531236	+	5.59502	NA	intron (ENSMUST00000193931.1, intron 2 of 3)	protein_coding-intron (ENSMUST00000161017.7, intron 2 of 14)	1958	ENSMUST00000161017.7	ENSMUSG00000026494	ENSMUST00000193931			Kif26b			protein_coding
e11ve16_cond1_1266	chr1	178634570	178634965	+	4.03833	NA	intron (ENSMUST00000193931.1, intron 2 of 3)	protein_coding-intron (ENSMUST00000161017.7, intron 2 of 14)	-2138	ENSMUST00000083033.1	ENSMUSG00000064967	ENSMUST00000083033			Gm24405			snRNA
e11ve16_cond1_1267	chr1	178639223	178640378	+	11.5072	NA	intron (ENSMUST00000193931.1, intron 2 of 3)	protein_coding-intron (ENSMUST00000161017.7, intron 2 of 14)	2895	ENSMUST00000083033.1	ENSMUSG00000064967	ENSMUST00000083033			Gm24405			snRNA
e11ve16_cond1_1268	chr1	178707848	178708398	+	6.05985	NA	intron (ENSMUST00000193931.1, intron 3 of 3)	protein_coding-intron (ENSMUST00000161017.7, intron 3 of 14)	-47685	ENSMUST00000192621.1	ENSMUSG00000102922	ENSMUST00000192621			Gm34176			processed_pseudogene
e11ve16_cond1_1269	chr1	178797851	178798350	+	3.71526	NA	promoter-TSS (ENSMUST00000160789.1)	protein_coding-promoter-TSS (ENSMUST00000160789.1)	-338	ENSMUST00000160789.1	ENSMUSG00000026494	ENSMUST00000193931			Kif26b			protein_coding
e11ve16_cond1_1270	chr1	178798757	178799162	+	4.36188	NA	intron (ENSMUST00000160789.1, intron 1 of 11)	protein_coding-intron (ENSMUST00000160789.1, intron 1 of 11)	521	ENSMUST00000160789.1	ENSMUSG00000026494	ENSMUST00000193931			Kif26b			protein_coding
e11ve16_cond1_1271	chr1	179217099	179217374	+	3.77132	NA	intron (ENSMUST00000068437.12, intron 1 of 8)	protein_coding-intron (ENSMUST00000068437.12, intron 1 of 8)	31604	ENSMUST00000068437.12	ENSMUSG00000055067	ENSMUST00000125756			Smyd3			protein_coding
e11ve16_cond1_1272	chr1	179506732	179507151	+	5.37598	NA	intron (ENSMUST00000111134.1, intron 1 of 5)	protein_coding-intron (ENSMUST00000111134.1, intron 1 of 5)	11064	ENSMUST00000194237.1	ENSMUSG00000055067	ENSMUST00000125756			Smyd3			protein_coding
e11ve16_cond1_1273	chr1	179569248	179569627	+	3.54738	NA	intron (ENSMUST00000153962.1, intron 1 of 3)	protein_coding-intron (ENSMUST00000040706.8, intron 1 of 10)	22928	ENSMUST00000153962.1	ENSMUSG00000038949	ENSMUST00000143270			Cnst			protein_coding
e11ve16_cond1_1274	chr1	179648716	179649008	+	5.17719	NA	Intergenic	Intergenic	-19348	ENSMUST00000040538.9	ENSMUSG00000038936	ENSMUST00000143936			Sccpdh			protein_coding
e11ve16_cond1_1275	chr1	179960002	179960502	+	9.50434	NA	promoter-TSS (ENSMUST00000076687.11)	protein_coding-promoter-TSS (ENSMUST00000076687.11)	-220	ENSMUST00000097453.8	ENSMUSG00000026490	ENSMUST00000135056			Cdc42bpa			protein_coding
e11ve16_cond1_1276	chr1	180212686	180213509	+	7.05507	NA	promoter-TSS (ENSMUST00000192794.1)	lncRNA-promoter-TSS (ENSMUST00000192794.1)	-696	ENSMUST00000193705.1	ENSMUSG00000104520	ENSMUST00000193705			Gm37336			lncRNA
e11ve16_cond1_1277	chr1	180242966	180243286	+	5.39597	NA	intron (ENSMUST00000010753.13, intron 2 of 10)	protein_coding-intron (ENSMUST00000010753.13, intron 2 of 10)	2631	ENSMUST00000111104.1	ENSMUSG00000010609	ENSMUST00000010753			Psen2			protein_coding
e11ve16_cond1_1278	chr1	180243703	180244280	+	3.75131	NA	intron (ENSMUST00000010753.13, intron 2 of 10)	protein_coding-intron (ENSMUST00000010753.13, intron 2 of 10)	1766	ENSMUST00000111104.1	ENSMUSG00000010609	ENSMUST00000010753			Psen2			protein_coding
e11ve16_cond1_1279	chr1	180313227	180313807	+	4.17286	NA	Intergenic	Intergenic	14667	ENSMUST00000192714.1	ENSMUSG00000055676	ENSMUST00000192714			Gm5069			transcribed_processed_pseudogene
e11ve16_cond1_1280	chr1	180331128	180331492	+	4.08926	NA	promoter-TSS (ENSMUST00000050581.3)	transcribed_processed_pseudogene-promoter-TSS (ENSMUST00000050581.3)	-760	ENSMUST00000050581.3	ENSMUSG00000055676	ENSMUST00000192714			Gm5069			transcribed_processed_pseudogene
e11ve16_cond1_1281	chr1	180331878	180332180	+	3.59442	NA	intron (ENSMUST00000070181.6, intron 1 of 7)	protein_coding-intron (ENSMUST00000070181.6, intron 1 of 7)	-1479	ENSMUST00000050581.3	ENSMUSG00000055676	ENSMUST00000192714			Gm5069			transcribed_processed_pseudogene
e11ve16_cond1_1282	chr1	180434278	180435116	+	4.84286	NA	exon (ENSMUST00000136521.1, exon 4 of 4)	protein_coding-exon (ENSMUST00000136521.1, exon 4 of 4)	27915	ENSMUST00000210107.1	ENSMUSG00000053963	ENSMUST00000210737			Stum			protein_coding
e11ve16_cond1_1283	chr1	180482972	180483411	+	4.726	NA	exon (ENSMUST00000136521.1, exon 1 of 4)	protein_coding-exon (ENSMUST00000136521.1, exon 1 of 4)	138	ENSMUST00000211561.1	ENSMUSG00000053963	ENSMUST00000210737			Stum			protein_coding
e11ve16_cond1_1284	chr1	180547538	180547839	+	3.29869	NA	Intergenic	Intergenic	-21236	ENSMUST00000194608.1	ENSMUSG00000026496	ENSMUST00000192411			Parp1			protein_coding
e11ve16_cond1_1285	chr1	180548218	180549307	+	4.70631	NA	Intergenic	Intergenic	-20162	ENSMUST00000194608.1	ENSMUSG00000026496	ENSMUST00000192411			Parp1			protein_coding
e11ve16_cond1_1286	chr1	180697014	180697238	+	3.68084	NA	promoter-TSS (ENSMUST00000027778.7)	protein_coding-promoter-TSS (ENSMUST00000027778.7)	-92	ENSMUST00000027778.7	ENSMUSG00000026497	ENSMUST00000027778			Mixl1			protein_coding
e11ve16_cond1_1287	chr1	180793671	180794539	+	4.56877	NA	Intergenic	Intergenic	19429	ENSMUST00000159789.1	ENSMUSG00000060743	ENSMUST00000162814			H3f3a			protein_coding
e11ve16_cond1_1288	chr1	180894039	180894858	+	6.52884	NA	promoter-TSS (ENSMUST00000155546.1)	protein_coding-promoter-TSS (ENSMUST00000155546.1)	-10	ENSMUST00000155546.1	ENSMUSG00000066652	ENSMUST00000085797			Lefty2			protein_coding
e11ve16_cond1_1289	chr1	180904666	180904946	+	3.50966	NA	exon (ENSMUST00000027802.8, exon 2 of 7)	protein_coding-exon (ENSMUST00000027802.8, exon 2 of 7)	483	ENSMUST00000194253.1	ENSMUSG00000026520	ENSMUST00000027802			Pycr2			protein_coding
e11ve16_cond1_1290	chr1	181151345	181151622	+	4.28858	NA	intron (ENSMUST00000111059.1, intron 1 of 3)	protein_coding-intron (ENSMUST00000111059.1, intron 1 of 3)	552	ENSMUST00000111059.1	ENSMUSG00000062169	ENSMUST00000134115			Cnih4			protein_coding
e11ve16_cond1_1291	chr1	181260979	181261715	+	16.2151	NA	Intergenic	Intergenic	-19027	ENSMUST00000117444.1	ENSMUSG00000081214	ENSMUST00000117444			Rpl35a-ps2			processed_pseudogene
e11ve16_cond1_1292	chr1	181272562	181272794	+	4.52454	NA	Intergenic	Intergenic	-9368	ENSMUST00000192106.1	ENSMUSG00000103260	ENSMUST00000192106			Gm8146			processed_pseudogene
e11ve16_cond1_1293	chr1	181465241	181465531	+	4.53358	NA	Intergenic	Intergenic	-32986	ENSMUST00000160086.1	ENSMUSG00000089927	ENSMUST00000160086			Gm16539			unprocessed_pseudogene
e11ve16_cond1_1294	chr1	182018530	182018805	+	4.54621	NA	intron (ENSMUST00000078719.12, intron 1 of 14)	protein_coding-intron (ENSMUST00000078719.12, intron 1 of 14)	994	ENSMUST00000111030.5	ENSMUSG00000022995	ENSMUST00000193074			Enah			protein_coding
e11ve16_cond1_1295	chr1	182019237	182019497	+	4.20974	NA	intron (ENSMUST00000078719.12, intron 1 of 14)	protein_coding-intron (ENSMUST00000078719.12, intron 1 of 14)	294	ENSMUST00000111030.5	ENSMUSG00000022995	ENSMUST00000193074			Enah			protein_coding
e11ve16_cond1_1296	chr1	182019880	182020677	+	4.271	NA	promoter-TSS (ENSMUST00000078719.12)	protein_coding-promoter-TSS (ENSMUST00000078719.12)	-288	ENSMUST00000111024.9	ENSMUSG00000022995	ENSMUST00000193074			Enah			protein_coding
e11ve16_cond1_1297	chr1	182081881	182082251	+	5.60949	NA	Intergenic	Intergenic	10663	ENSMUST00000193768.1	ENSMUSG00000103379	ENSMUST00000193768			Gm37177			processed_pseudogene
e11ve16_cond1_1298	chr1	182091310	182091877	+	6.96818	NA	Intergenic	Intergenic	20190	ENSMUST00000193768.1	ENSMUSG00000103379	ENSMUST00000193768			Gm37177			processed_pseudogene
e11ve16_cond1_1299	chr1	182189846	182190576	+	5.77663	NA	Intergenic	Intergenic	-25725	ENSMUST00000227586.1	ENSMUSG00000091013	ENSMUST00000227629			Vmn1r1			protein_coding
e11ve16_cond1_1300	chr1	182460910	182461171	+	4.32172	NA	intron (ENSMUST00000191804.1, intron 10 of 10)	protein_coding-intron (ENSMUST00000117245.1, intron 17 of 17)	16268	ENSMUST00000191626.1	ENSMUSG00000026510	ENSMUST00000117245			Trp53bp2			protein_coding
e11ve16_cond1_1301	chr1	182527518	182527872	+	3.69605	NA	Intergenic	Intergenic	-10087	ENSMUST00000192483.1	ENSMUSG00000026509	ENSMUST00000192230			Capn2			protein_coding
e11ve16_cond1_1302	chr1	182764491	182764847	+	3.14365	NA	promoter-TSS (ENSMUST00000085724.4)	protein_coding-promoter-TSS (ENSMUST00000085724.4)	113	ENSMUST00000194981.1	ENSMUSG00000038576	ENSMUST00000085724			Susd4			protein_coding
e11ve16_cond1_1303	chr1	183183233	183183434	+	3.52937	NA	intron (ENSMUST00000195372.1, intron 1 of 8)	protein_coding-intron (ENSMUST00000003035.11, intron 2 of 9)	23083	ENSMUST00000195236.1	ENSMUSG00000102478	ENSMUST00000191852			BC085271			transcribed_processed_pseudogene
e11ve16_cond1_1304	chr1	183442345	183442601	+	4.78686	NA	Intergenic	Intergenic	21818	ENSMUST00000192860.1	ENSMUSG00000104022	ENSMUST00000192860			Gm37214			lncRNA
e11ve16_cond1_1305	chr1	183930594	183931170	+	4.98357	NA	Intergenic	Intergenic	2477	ENSMUST00000193891.1	ENSMUSG00000102743	ENSMUST00000193891			Gm38108			lncRNA
e11ve16_cond1_1306	chr1	183982343	183983505	+	6.27013	NA	Intergenic	Intergenic	-30378	ENSMUST00000139839.1	ENSMUSG00000039384	ENSMUST00000048655			Dusp10			protein_coding
e11ve16_cond1_1307	chr1	184019605	184019807	+	3.77873	NA	intron (ENSMUST00000139839.1, intron 2 of 2)	protein_coding-intron (ENSMUST00000139839.1, intron 2 of 2)	6404	ENSMUST00000139839.1	ENSMUSG00000039384	ENSMUST00000048655			Dusp10			protein_coding
e11ve16_cond1_1308	chr1	184065781	184066716	+	9.37014	NA	intron (ENSMUST00000048655.7, intron 2 of 3)	protein_coding-intron (ENSMUST00000048655.7, intron 2 of 3)	31867	ENSMUST00000048655.7	ENSMUSG00000039384	ENSMUST00000048655			Dusp10			protein_coding
e11ve16_cond1_1309	chr1	184727661	184727872	+	4.36287	NA	exon (ENSMUST00000048572.6, exon 4 of 4)	protein_coding-exon (ENSMUST00000048572.6, exon 4 of 4)	3832	ENSMUST00000174257.2	ENSMUSG00000039377	ENSMUST00000174257			Hlx			protein_coding
e11ve16_cond1_1310	chr1	184965557	184965773	+	3.70135	NA	intron (ENSMUST00000027929.9, intron 1 of 17)	protein_coding-intron (ENSMUST00000027929.9, intron 1 of 17)	33810	ENSMUST00000192657.1	ENSMUSG00000026620	ENSMUST00000027929			Mark1			protein_coding
e11ve16_cond1_1311	chr1	184999375	185000146	+	20.56	NA	promoter-TSS (ENSMUST00000027929.9)	protein_coding-promoter-TSS (ENSMUST00000027929.9)	-190	ENSMUST00000027929.9	ENSMUSG00000026620	ENSMUST00000027929			Mark1			protein_coding
e11ve16_cond1_1312	chr1	185092003	185092276	+	3.79118	NA	TTS (ENSMUST00000194719.1)	lncRNA-TTS (ENSMUST00000194719.1)	148	ENSMUST00000195649.1	ENSMUSG00000104461	ENSMUST00000195649			Gm37662			lncRNA
e11ve16_cond1_1313	chr1	185559596	185559879	+	4.11981	NA	Intergenic	Intergenic	62349	ENSMUST00000192616.1	ENSMUSG00000102185	ENSMUST00000192616			5033404E19Rik			transcribed_processed_pseudogene
e11ve16_cond1_1314	chr1	185654785	185655138	+	7.24568	NA	Intergenic	Intergenic	-89842	ENSMUST00000195210.1	ENSMUSG00000103799	ENSMUST00000195210			Gm38093			lncRNA
e11ve16_cond1_1315	chr1	185784615	185784873	+	3.43722	NA	Intergenic	Intergenic	39941	ENSMUST00000195210.1	ENSMUSG00000103799	ENSMUST00000195210			Gm38093			lncRNA
e11ve16_cond1_1316	chr1	186144970	186145377	+	4.2733	NA	Intergenic	Intergenic	21972	ENSMUST00000158738.1	ENSMUSG00000089363	ENSMUST00000158738			Gm23821			rRNA
e11ve16_cond1_1317	chr1	186223625	186224297	+	4.1318	NA	TTS (ENSMUST00000195810.1)	lncRNA-TTS (ENSMUST00000195810.1)	41704	ENSMUST00000193401.1	ENSMUSG00000102790	ENSMUST00000193401			Gm37272			TEC
e11ve16_cond1_1318	chr1	186687052	186687275	+	3.94764	NA	intron (ENSMUST00000045288.13, intron 1 of 6)	protein_coding-intron (ENSMUST00000045288.13, intron 1 of 6)	10421	ENSMUST00000158420.1	ENSMUSG00000089045	ENSMUST00000158420			Gm26169			snoRNA
e11ve16_cond1_1319	chr1	186833507	186834586	+	9.60624	NA	Intergenic	Intergenic	84650	ENSMUST00000180869.1	ENSMUSG00000097784	ENSMUST00000180869			A430105J06Rik			lncRNA
e11ve16_cond1_1320	chr1	186926606	186927523	+	5.60723	NA	exon (ENSMUST00000194513.1, exon 1 of 2)	lncRNA-exon (ENSMUST00000194513.1, exon 1 of 2)	102	ENSMUST00000194671.1	ENSMUSG00000103503	ENSMUST00000194513			1700023G09Rik			lncRNA
e11ve16_cond1_1321	chr1	187000209	187000488	+	4.38622	NA	Intergenic	Intergenic	6256	ENSMUST00000192135.1	ENSMUSG00000104424	ENSMUST00000192135			Gm19058			processed_pseudogene
e11ve16_cond1_1322	chr1	187178478	187179117	+	4.51549	NA	intron (ENSMUST00000110945.3, intron 4 of 6)	protein_coding-intron (ENSMUST00000027908.12, intron 4 of 9)	-35700	ENSMUST00000184543.1	ENSMUSG00000026611	ENSMUST00000183469			Spata17			protein_coding
e11ve16_cond1_1323	chr1	187338961	187339246	+	5.34433	NA	intron (ENSMUST00000160471.7, intron 8 of 9)	protein_coding-intron (ENSMUST00000065573.13, intron 8 of 9)	38366	ENSMUST00000192285.1	ENSMUSG00000104245	ENSMUST00000192285			Gm38155			lncRNA
e11ve16_cond1_1324	chr1	187609875	187610085	+	4.49509	NA	intron (ENSMUST00000152927.1, intron 1 of 1)	protein_coding-intron (ENSMUST00000110939.7, intron 1 of 7)	284	ENSMUST00000152927.1	ENSMUSG00000026610	ENSMUST00000110939			Esrrg			protein_coding
e11ve16_cond1_1325	chr1	187651285	187651557	+	5.5457	NA	intron (ENSMUST00000191663.1, intron 1 of 3)	protein_coding-intron (ENSMUST00000110939.7, intron 1 of 7)	403	ENSMUST00000191663.1	ENSMUSG00000103961	ENSMUST00000191663			Gm36388			lncRNA
e11ve16_cond1_1326	chr1	187662257	187662479	+	3.3517	NA	TTS (ENSMUST00000195116.1)	TEC-TTS (ENSMUST00000195116.1)	993	ENSMUST00000195116.1	ENSMUSG00000103401	ENSMUST00000195116			Gm37929			TEC
e11ve16_cond1_1327	chr1	187663107	187663523	+	5.55056	NA	promoter-TSS (ENSMUST00000195116.1)	TEC-promoter-TSS (ENSMUST00000195116.1)	46	ENSMUST00000195116.1	ENSMUSG00000103401	ENSMUST00000195116			Gm37929			TEC
e11ve16_cond1_1328	chr1	187900518	187902031	+	10.0339	NA	intron (ENSMUST00000127489.7, intron 3 of 3)	protein_coding-intron (ENSMUST00000110939.7, intron 2 of 7)	-96553	ENSMUST00000027906.12	ENSMUSG00000026610	ENSMUST00000110939			Esrrg			protein_coding
e11ve16_cond1_1329	chr1	187902286	187902628	+	3.84114	NA	intron (ENSMUST00000127489.7, intron 3 of 3)	protein_coding-intron (ENSMUST00000110939.7, intron 2 of 7)	-95370	ENSMUST00000027906.12	ENSMUSG00000026610	ENSMUST00000110939			Esrrg			protein_coding
e11ve16_cond1_1330	chr1	187907494	187908432	+	9.64005	NA	intron (ENSMUST00000127489.7, intron 3 of 3)	protein_coding-intron (ENSMUST00000110939.7, intron 2 of 7)	-89864	ENSMUST00000027906.12	ENSMUSG00000026610	ENSMUST00000110939			Esrrg			protein_coding
e11ve16_cond1_1331	chr1	187997050	187997480	+	11.1186	NA	promoter-TSS (ENSMUST00000027906.12)	protein_coding-promoter-TSS (ENSMUST00000027906.12)	-562	ENSMUST00000027906.12	ENSMUSG00000026610	ENSMUST00000110939			Esrrg			protein_coding
e11ve16_cond1_1332	chr1	188341942	188342218	+	4.03889	NA	intron (ENSMUST00000142189.7, intron 3 of 4)	protein_coding-intron (ENSMUST00000060479.13, intron 3 of 70)	79046	ENSMUST00000060479.13	ENSMUSG00000026609	ENSMUST00000060479			Ush2a			protein_coding
e11ve16_cond1_1333	chr1	188746234	188746637	+	4.79956	NA	intron (ENSMUST00000060479.13, intron 43 of 70)	protein_coding-intron (ENSMUST00000060479.13, intron 43 of 70)	-14041	ENSMUST00000122601.1	ENSMUSG00000084550	ENSMUST00000122601			Gm25269			snRNA
e11ve16_cond1_1334	chr1	189342968	189343287	+	3.40063	NA	promoter-TSS (ENSMUST00000191809.1)	lncRNA-promoter-TSS (ENSMUST00000191809.1)	228	ENSMUST00000193319.5	ENSMUSG00000037624	ENSMUST00000194402			Kcnk2			protein_coding
e11ve16_cond1_1335	chr1	189430438	189430705	+	4.62564	NA	Intergenic	Intergenic	-28298	ENSMUST00000180044.7	ENSMUSG00000037624	ENSMUST00000194402			Kcnk2			protein_coding
e11ve16_cond1_1336	chr1	189494419	189494986	+	4.26625	NA	Intergenic	Intergenic	-92429	ENSMUST00000180044.7	ENSMUSG00000037624	ENSMUST00000194402			Kcnk2			protein_coding
e11ve16_cond1_1337	chr1	189495121	189495741	+	5.72841	NA	Intergenic	Intergenic	-93158	ENSMUST00000180044.7	ENSMUSG00000037624	ENSMUST00000194402			Kcnk2			protein_coding
e11ve16_cond1_1338	chr1	189581606	189581930	+	4.53914	NA	Intergenic	Intergenic	58466	ENSMUST00000192679.1	ENSMUSG00000103087	ENSMUST00000192679			Gm38122			TEC
e11ve16_cond1_1339	chr1	189608509	189608759	+	5.56691	NA	Intergenic	Intergenic	31600	ENSMUST00000192679.1	ENSMUSG00000103087	ENSMUST00000192679			Gm38122			TEC
e11ve16_cond1_1340	chr1	189804012	189805141	+	8.05165	NA	intron (ENSMUST00000194127.5, intron 3 of 9)	protein_coding-intron (ENSMUST00000027898.6, intron 2 of 17)	17904	ENSMUST00000027898.6	ENSMUSG00000026604	ENSMUST00000097442			Ptpn14			protein_coding
e11ve16_cond1_1341	chr1	189993597	189994393	+	4.259	NA	Intergenic	Intergenic	-71632	ENSMUST00000027897.7	ENSMUSG00000026603	ENSMUST00000027897			Smyd2			protein_coding
e11ve16_cond1_1342	chr1	190081015	190081216	+	3.55415	NA	Intergenic	Intergenic	-87555	ENSMUST00000189880.1	ENSMUSG00000099404	ENSMUST00000189880			Gm28172			lncRNA
e11ve16_cond1_1343	chr1	190169093	190170051	+	4.62054	NA	promoter-TSS (ENSMUST00000010319.13)	protein_coding-promoter-TSS (ENSMUST00000010319.13)	-173	ENSMUST00000010319.13	ENSMUSG00000010175	ENSMUST00000010319			Prox1			protein_coding
e11ve16_cond1_1344	chr1	190174433	190174831	+	4.8742	NA	intron (ENSMUST00000110279.3, intron 1 of 1)	lncRNA-intron (ENSMUST00000110279.3, intron 1 of 1)	-3918	ENSMUST00000175916.7	ENSMUSG00000010175	ENSMUST00000010319			Prox1			protein_coding
e11ve16_cond1_1345	chr1	190175255	190175540	+	6.27186	NA	intron (ENSMUST00000110279.3, intron 1 of 1)	lncRNA-intron (ENSMUST00000110279.3, intron 1 of 1)	-4683	ENSMUST00000175916.7	ENSMUSG00000010175	ENSMUST00000010319			Prox1			protein_coding
e11ve16_cond1_1346	chr1	190402871	190403074	+	3.6415	NA	promoter-TSS (ENSMUST00000193966.1)	lncRNA-promoter-TSS (ENSMUST00000193966.1)	-673	ENSMUST00000193966.1	ENSMUSG00000103644	ENSMUST00000193966			Gm29678			lncRNA
e11ve16_cond1_1347	chr1	190425244	190425578	+	4.74736	NA	intron (ENSMUST00000195170.1, intron 2 of 2)	lncRNA-intron (ENSMUST00000195170.1, intron 2 of 2)	19444	ENSMUST00000195170.1	ENSMUSG00000103510	ENSMUST00000195170			Gm30725			lncRNA
e11ve16_cond1_1348	chr1	190447759	190448903	+	9.54579	NA	Intergenic	Intergenic	-3476	ENSMUST00000195170.1	ENSMUSG00000103510	ENSMUST00000195170			Gm30725			lncRNA
e11ve16_cond1_1349	chr1	190532982	190533570	+	6.92488	NA	Intergenic	Intergenic	-50119	ENSMUST00000175323.2	ENSMUSG00000093064	ENSMUST00000175323			Gm23153			misc_RNA
e11ve16_cond1_1350	chr1	190534000	190534690	+	4.15477	NA	Intergenic	Intergenic	-51188	ENSMUST00000175323.2	ENSMUSG00000093064	ENSMUST00000175323			Gm23153			misc_RNA
e11ve16_cond1_1351	chr1	190880821	190881021	+	4.2905	NA	intron (ENSMUST00000162500.7, intron 2 of 8)	protein_coding-intron (ENSMUST00000061611.14, intron 5 of 14)	18796	ENSMUST00000162692.1	ENSMUSG00000089872	ENSMUST00000162500			Rps6kc1			protein_coding
e11ve16_cond1_1352	chr1	190978109	190979289	+	6.93627	NA	intron (ENSMUST00000166139.6, intron 1 of 7)	protein_coding-intron (ENSMUST00000047409.8, intron 1 of 7)	303	ENSMUST00000047409.8	ENSMUSG00000037568	ENSMUST00000047409			Vash2			protein_coding
e11ve16_cond1_1353	chr1	190979552	190979770	+	4.82586	NA	promoter-TSS (ENSMUST00000047409.8)	protein_coding-promoter-TSS (ENSMUST00000047409.8)	-365	ENSMUST00000166139.6	ENSMUSG00000037568	ENSMUST00000047409			Vash2			protein_coding
e11ve16_cond1_1354	chr1	191063434	191063633	+	6.81391	NA	promoter-TSS (ENSMUST00000027945.5)	protein_coding-promoter-TSS (ENSMUST00000027945.5)	502	ENSMUST00000078259.7	ENSMUSG00000062510	ENSMUST00000078259			Nsl1			protein_coding
e11ve16_cond1_1355	chr1	191205010	191205330	+	5.61368	NA	intron (ENSMUST00000195117.1, intron 1 of 3)	protein_coding-intron (ENSMUST00000195117.1, intron 1 of 3)	8264	ENSMUST00000157836.1	ENSMUSG00000088461	ENSMUST00000157836			Gm24748			misc_RNA
e11ve16_cond1_1356	chr1	191396287	191396712	+	3.87166	NA	promoter-TSS (ENSMUST00000194953.1)	protein_coding-promoter-TSS (ENSMUST00000194953.1)	-180	ENSMUST00000194953.1	ENSMUSG00000026626	ENSMUST00000194832			Ppp2r5a			protein_coding
e11ve16_cond1_1357	chr1	191419813	191420453	+	4.27931	NA	Intergenic	Intergenic	12467	ENSMUST00000194903.1	ENSMUSG00000103433	ENSMUST00000194903			Gm2272			processed_pseudogene
e11ve16_cond1_1358	chr1	191555430	191555921	+	7.75658	NA	intron (ENSMUST00000195650.5, intron 11 of 15)	protein_coding-intron (ENSMUST00000027933.10, intron 10 of 14)	-18783	ENSMUST00000192556.1	ENSMUSG00000102246	ENSMUST00000192556			9430037O13Rik			TEC
e11ve16_cond1_1359	chr1	191641619	191641852	+	14.7537	NA	Intergenic	Intergenic	44088	ENSMUST00000194205.1	ENSMUSG00000102970	ENSMUST00000194205			Gm37349			TEC
e11ve16_cond1_1360	chr1	191645341	191645680	+	3.73746	NA	Intergenic	Intergenic	47863	ENSMUST00000194205.1	ENSMUSG00000102970	ENSMUST00000194205			Gm37349			TEC
e11ve16_cond1_1361	chr1	191718715	191719110	+	4.19403	NA	intron (ENSMUST00000130876.1, intron 1 of 4)	protein_coding-intron (ENSMUST00000110855.7, intron 1 of 7)	391	ENSMUST00000130876.1	ENSMUSG00000026623	ENSMUST00000133076			Lpgat1			protein_coding
e11ve16_cond1_1362	chr1	191817535	191817971	+	5.81737	NA	Intergenic	Intergenic	-3691	ENSMUST00000027931.7	ENSMUSG00000026622	ENSMUST00000027931			Nek2			protein_coding
e11ve16_cond1_1363	chr1	191821024	191821435	+	5.97449	NA	promoter-TSS (ENSMUST00000027931.7)	protein_coding-promoter-TSS (ENSMUST00000027931.7)	-215	ENSMUST00000027931.7	ENSMUSG00000026622	ENSMUST00000027931			Nek2			protein_coding
e11ve16_cond1_1364	chr1	191839433	191839750	+	5.05219	NA	Intergenic	Intergenic	12443	ENSMUST00000136733.1	ENSMUSG00000026622	ENSMUST00000027931			Nek2			protein_coding
e11ve16_cond1_1365	chr1	192086348	192086578	+	3.47205	NA	intron (ENSMUST00000085573.11, intron 1 of 11)	protein_coding-intron (ENSMUST00000085573.11, intron 1 of 11)	-5892	ENSMUST00000181127.2	ENSMUSG00000097089	ENSMUST00000181127			Gm26879			lncRNA
e11ve16_cond1_1366	chr1	192181123	192181944	+	6.92359	NA	Intergenic	Intergenic	-9241	ENSMUST00000078470.11	ENSMUSG00000058248	ENSMUST00000078470			Kcnh1			protein_coding
e11ve16_cond1_1367	chr1	192197389	192197846	+	4.64779	NA	intron (ENSMUST00000078470.11, intron 1 of 10)	protein_coding-intron (ENSMUST00000078470.11, intron 1 of 10)	6843	ENSMUST00000110844.2	ENSMUSG00000058248	ENSMUST00000078470			Kcnh1			protein_coding
e11ve16_cond1_1368	chr1	192368047	192368619	+	4.20755	NA	intron (ENSMUST00000078470.11, intron 7 of 10)	protein_coding-intron (ENSMUST00000078470.11, intron 7 of 10)	-66407	ENSMUST00000151152.2	ENSMUSG00000058248	ENSMUST00000078470			Kcnh1			protein_coding
e11ve16_cond1_1369	chr1	192806566	192807144	+	5.61695	NA	Intergenic	Intergenic	14272	ENSMUST00000195130.1	ENSMUSG00000103874	ENSMUST00000195130			Gm38360			processed_pseudogene
e11ve16_cond1_1370	chr1	192807275	192807523	+	3.35589	NA	Intergenic	Intergenic	13728	ENSMUST00000195130.1	ENSMUSG00000103874	ENSMUST00000195130			Gm38360			processed_pseudogene
e11ve16_cond1_1371	chr1	192833725	192834617	+	6.9969	NA	exon (ENSMUST00000057543.2, exon 1 of 1)	TEC-exon (ENSMUST00000057543.2, exon 1 of 1)	548	ENSMUST00000057543.2	ENSMUSG00000047384	ENSMUST00000195012			A730013G03Rik			TEC
e11ve16_cond1_1372	chr1	192855512	192855821	+	4.2067	NA	promoter-TSS (ENSMUST00000125391.1)	protein_coding-promoter-TSS (ENSMUST00000125391.1)	90	ENSMUST00000155579.7	ENSMUSG00000016262	ENSMUST00000155579			Sertad4			protein_coding
e11ve16_cond1_1373	chr1	192856004	192856502	+	4.08651	NA	promoter-TSS (ENSMUST00000125391.1)	protein_coding-promoter-TSS (ENSMUST00000125391.1)	-497	ENSMUST00000155579.7	ENSMUSG00000016262	ENSMUST00000155579			Sertad4			protein_coding
e11ve16_cond1_1374	chr1	193035009	193035329	+	4.92083	NA	intron (ENSMUST00000016344.8, intron 1 of 8)	protein_coding-intron (ENSMUST00000016344.8, intron 1 of 8)	475	ENSMUST00000191907.1	ENSMUSG00000016200	ENSMUST00000215093			Syt14			protein_coding
e11ve16_cond1_1375	chr1	193198949	193199323	+	5.88937	NA	intron (ENSMUST00000161151.2, intron 2 of 2)	protein_coding-intron (ENSMUST00000043550.10, intron 2 of 15)	-1165	ENSMUST00000161367.1	ENSMUSG00000037318	ENSMUST00000162480			Traf3ip3			protein_coding
e11ve16_cond1_1376	chr1	193369861	193370217	+	5.13187	NA	intron (ENSMUST00000169907.7, intron 1 of 11)	protein_coding-intron (ENSMUST00000016323.10, intron 1 of 12)	186	ENSMUST00000169907.7	ENSMUSG00000016179	ENSMUST00000165718			Camk1g			protein_coding
e11ve16_cond1_1377	chr1	193417931	193418309	+	5.87293	NA	Intergenic	Intergenic	-47822	ENSMUST00000016323.10	ENSMUSG00000016179	ENSMUST00000165718			Camk1g			protein_coding
e11ve16_cond1_1378	chr1	193450810	193451199	+	4.31446	NA	Intergenic	Intergenic	-24286	ENSMUST00000191762.1	ENSMUSG00000102648	ENSMUST00000191762			Gm38022			processed_pseudogene
e11ve16_cond1_1379	chr1	193504076	193505148	+	6.99342	NA	Intergenic	Intergenic	2918	ENSMUST00000083599.1	ENSMUSG00000065533	ENSMUST00000083599			Mir205			miRNA
e11ve16_cond1_1380	chr1	193542162	193542376	+	3.90967	NA	Intergenic	Intergenic	-32095	ENSMUST00000180420.2	ENSMUSG00000097850	ENSMUST00000180420			Mir205hg			lncRNA
e11ve16_cond1_1381	chr1	193550647	193552399	+	16.7596	NA	Intergenic	Intergenic	-41349	ENSMUST00000180420.2	ENSMUSG00000097850	ENSMUST00000180420			Mir205hg			lncRNA
e11ve16_cond1_1382	chr1	193567117	193567335	+	3.78032	NA	Intergenic	Intergenic	-57052	ENSMUST00000180420.2	ENSMUSG00000097850	ENSMUST00000180420			Mir205hg			lncRNA
e11ve16_cond1_1383	chr1	193933879	193934137	+	4.42153	NA	Intergenic	Intergenic	66999	ENSMUST00000194272.1	ENSMUSG00000104182	ENSMUST00000194272			Gm21362			processed_pseudogene
e11ve16_cond1_1384	chr1	194108625	194109642	+	6.63649	NA	Intergenic	Intergenic	113626	ENSMUST00000193395.1	ENSMUSG00000103692	ENSMUST00000193395			4930503O07Rik			lncRNA
e11ve16_cond1_1385	chr1	194518768	194519283	+	7.63488	NA	Intergenic	Intergenic	-99193	ENSMUST00000194398.1	ENSMUSG00000026640	ENSMUST00000135664			Plxna2			protein_coding
e11ve16_cond1_1386	chr1	194695478	194695801	+	5.73363	NA	intron (ENSMUST00000027952.11, intron 3 of 31)	protein_coding-intron (ENSMUST00000027952.11, intron 3 of 31)	18637	ENSMUST00000194586.1	ENSMUSG00000102841	ENSMUST00000194586			Gm38036			TEC
e11ve16_cond1_1387	chr1	194938926	194939313	+	4.02748	NA	exon (ENSMUST00000195092.1, exon 1 of 1)	protein_coding-exon (ENSMUST00000195092.1, exon 1 of 1)	124	ENSMUST00000194036.1	ENSMUSG00000016494	ENSMUST00000194458			Cd34			protein_coding
e11ve16_cond1_1388	chr1	195371645	195371965	+	39.0315	NA	Intergenic	Intergenic	50522	ENSMUST00000194529.1	ENSMUSG00000102307	ENSMUST00000194529			Gm38194			TEC
e11ve16_cond1_1389	chr10	3534817	3535504	+	6.0411	NA	Intergenic	Intergenic	-5080	ENSMUST00000019896.4	ENSMUSG00000019762	ENSMUST00000019896			Iyd			protein_coding
e11ve16_cond1_1390	chr10	3648237	3648797	+	7.12853	NA	Intergenic	Intergenic	-91847	ENSMUST00000120274.7	ENSMUSG00000040624	ENSMUST00000238840			Plekhg1			protein_coding
e11ve16_cond1_1391	chr10	3691097	3691322	+	5.41897	NA	Intergenic	Intergenic	-49155	ENSMUST00000120274.7	ENSMUSG00000040624	ENSMUST00000238840			Plekhg1			protein_coding
e11ve16_cond1_1392	chr10	3851264	3852084	+	5.35227	NA	intron (ENSMUST00000238840.1, intron 1 of 3)	protein_coding-intron (ENSMUST00000120274.7, intron 2 of 16)	16710	ENSMUST00000238840.1	ENSMUSG00000040624	ENSMUST00000238840			Plekhg1			protein_coding
e11ve16_cond1_1393	chr10	3857995	3858931	+	6.33268	NA	intron (ENSMUST00000238840.1, intron 1 of 3)	protein_coding-intron (ENSMUST00000120274.7, intron 2 of 16)	11144	ENSMUST00000117631.1	ENSMUSG00000082123	ENSMUST00000117631			Gm16149			processed_pseudogene
e11ve16_cond1_1394	chr10	3863109	3863355	+	7.71934	NA	intron (ENSMUST00000238840.1, intron 1 of 3)	protein_coding-intron (ENSMUST00000120274.7, intron 2 of 16)	6375	ENSMUST00000117631.1	ENSMUSG00000082123	ENSMUST00000117631			Gm16149			processed_pseudogene
e11ve16_cond1_1395	chr10	3863874	3864409	+	4.78439	NA	intron (ENSMUST00000238840.1, intron 1 of 3)	protein_coding-intron (ENSMUST00000120274.7, intron 2 of 16)	5466	ENSMUST00000117631.1	ENSMUSG00000082123	ENSMUST00000117631			Gm16149			processed_pseudogene
e11ve16_cond1_1396	chr10	3941686	3942267	+	6.16663	NA	intron (ENSMUST00000120274.7, intron 11 of 16)	protein_coding-intron (ENSMUST00000042438.12, intron 10 of 15)	5115	ENSMUST00000119653.1	ENSMUSG00000082605	ENSMUST00000119653			Gm16148			processed_pseudogene
e11ve16_cond1_1397	chr10	4105866	4106204	+	4.37286	NA	intron (ENSMUST00000120585.7, intron 25 of 27)	protein_coding-intron (ENSMUST00000043735.7, intron 25 of 27)	1722	ENSMUST00000083858.1	ENSMUSG00000065792	ENSMUST00000083858			Gm25515			snRNA
e11ve16_cond1_1398	chr10	4111656	4112235	+	6.67925	NA	intron (ENSMUST00000117291.7, intron 26 of 27)	protein_coding-intron (ENSMUST00000043735.7, intron 26 of 27)	7632	ENSMUST00000083858.1	ENSMUSG00000065792	ENSMUST00000083858			Gm25515			snRNA
e11ve16_cond1_1399	chr10	4117128	4117993	+	6.667	NA	intron (ENSMUST00000117291.7, intron 26 of 27)	protein_coding-intron (ENSMUST00000043735.7, intron 26 of 27)	13247	ENSMUST00000083858.1	ENSMUSG00000065792	ENSMUST00000083858			Gm25515			snRNA
e11ve16_cond1_1400	chr10	4126398	4127127	+	6.20374	NA	intron (ENSMUST00000117291.7, intron 26 of 27)	protein_coding-intron (ENSMUST00000043735.7, intron 26 of 27)	22449	ENSMUST00000083858.1	ENSMUSG00000065792	ENSMUST00000083858			Gm25515			snRNA
e11ve16_cond1_1401	chr10	4132434	4132940	+	6.14966	NA	intron (ENSMUST00000117291.7, intron 26 of 27)	protein_coding-intron (ENSMUST00000043735.7, intron 26 of 27)	28374	ENSMUST00000083858.1	ENSMUSG00000065792	ENSMUST00000083858			Gm25515			snRNA
e11ve16_cond1_1402	chr10	4265650	4266544	+	11.7963	NA	promoter-TSS (ENSMUST00000045730.6)	protein_coding-promoter-TSS (ENSMUST00000045730.6)	-283	ENSMUST00000045730.6	ENSMUSG00000038587	ENSMUST00000216139			Akap12			protein_coding
e11ve16_cond1_1403	chr10	4387562	4387998	+	6.13593	NA	promoter-TSS (ENSMUST00000100077.4)	protein_coding-promoter-TSS (ENSMUST00000100077.4)	-305	ENSMUST00000100077.4	ENSMUSG00000075327	ENSMUST00000100077			Zbtb2			protein_coding
e11ve16_cond1_1404	chr10	4486496	4487113	+	5.17135	NA	intron (ENSMUST00000138112.7, intron 1 of 10)	protein_coding-intron (ENSMUST00000138112.7, intron 1 of 10)	2570	ENSMUST00000083437.1	ENSMUSG00000065371	ENSMUST00000083437			Gm22739			snRNA
e11ve16_cond1_1405	chr10	5289722	5290007	+	4.90141	NA	intron (ENSMUST00000215295.1, intron 54 of 145)	protein_coding-intron (ENSMUST00000215295.1, intron 54 of 145)	-67309	ENSMUST00000104408.1	ENSMUSG00000094906	ENSMUST00000104408			Gm23573			snRNA
e11ve16_cond1_1406	chr10	5368125	5368959	+	9.35859	NA	promoter-TSS (ENSMUST00000215887.1)	protein_coding-promoter-TSS (ENSMUST00000215887.1)	-56	ENSMUST00000215887.1	ENSMUSG00000096054	ENSMUST00000217064			Syne1			protein_coding
e11ve16_cond1_1407	chr10	5921252	5922338	+	6.88705	NA	intron (ENSMUST00000064225.13, intron 1 of 5)	protein_coding-intron (ENSMUST00000019909.7, intron 1 of 6)	571	ENSMUST00000019909.7	ENSMUSG00000019775	ENSMUST00000117676			Rgs17			protein_coding
e11ve16_cond1_1408	chr10	7052465	7052876	+	3.85676	NA	promoter-TSS (ENSMUST00000086896.9)	protein_coding-promoter-TSS (ENSMUST00000086896.9)	-192	ENSMUST00000086896.9	ENSMUSG00000064065	ENSMUST00000149708			Ipcef1			protein_coding
e11ve16_cond1_1409	chr10	7680536	7680819	+	3.67342	NA	promoter-TSS (ENSMUST00000165952.8)	protein_coding-promoter-TSS (ENSMUST00000165952.8)	453	ENSMUST00000159977.1	ENSMUSG00000019795	ENSMUST00000159835			Pcmt1			protein_coding
e11ve16_cond1_1410	chr10	8132726	8133942	+	4.97414	NA	Intergenic	Intergenic	-42797	ENSMUST00000219578.1	ENSMUSG00000112109	ENSMUST00000219578			Gm30906			lncRNA
e11ve16_cond1_1411	chr10	8286912	8287881	+	5.98526	NA	intron (ENSMUST00000219116.1, intron 2 of 6)	protein_coding-intron (ENSMUST00000061601.8, intron 5 of 7)	14846	ENSMUST00000219116.1	ENSMUSG00000047712	ENSMUST00000219116			Ust			protein_coding
e11ve16_cond1_1412	chr10	8489397	8490734	+	7.95045	NA	intron (ENSMUST00000061601.8, intron 1 of 7)	protein_coding-intron (ENSMUST00000061601.8, intron 1 of 7)	28760	ENSMUST00000061601.8	ENSMUSG00000047712	ENSMUST00000219116			Ust			protein_coding
e11ve16_cond1_1413	chr10	8491954	8492409	+	5.03797	NA	intron (ENSMUST00000061601.8, intron 1 of 7)	protein_coding-intron (ENSMUST00000061601.8, intron 1 of 7)	26644	ENSMUST00000061601.8	ENSMUSG00000047712	ENSMUST00000219116			Ust			protein_coding
e11ve16_cond1_1414	chr10	8517388	8517878	+	5.59668	NA	intron (ENSMUST00000061601.8, intron 1 of 7)	protein_coding-intron (ENSMUST00000061601.8, intron 1 of 7)	1192	ENSMUST00000061601.8	ENSMUSG00000047712	ENSMUST00000219116			Ust			protein_coding
e11ve16_cond1_1415	chr10	8517982	8518327	+	3.43897	NA	exon (ENSMUST00000061601.8, exon 1 of 8)	protein_coding-exon (ENSMUST00000061601.8, exon 1 of 8)	671	ENSMUST00000061601.8	ENSMUSG00000047712	ENSMUST00000219116			Ust			protein_coding
e11ve16_cond1_1416	chr10	8722678	8723014	+	5.73832	NA	exon (ENSMUST00000015449.5, exon 20 of 20)	protein_coding-exon (ENSMUST00000015449.5, exon 20 of 20)	9605	ENSMUST00000213934.1	ENSMUSG00000111215	ENSMUST00000213934			Gm48654			lncRNA
e11ve16_cond1_1417	chr10	8785728	8786092	+	4.50533	NA	intron (ENSMUST00000015449.5, intron 6 of 19)	protein_coding-intron (ENSMUST00000015449.5, intron 6 of 19)	-23436	ENSMUST00000212553.1	ENSMUSG00000015305	ENSMUST00000212553			Sash1			protein_coding
e11ve16_cond1_1418	chr10	8973316	8973935	+	4.68405	NA	Intergenic	Intergenic	21676	ENSMUST00000213841.1	ENSMUSG00000111674	ENSMUST00000213841			Gm48728			lncRNA
e11ve16_cond1_1419	chr10	9011966	9012493	+	6.38361	NA	Intergenic	Intergenic	59246	ENSMUST00000216441.1	ENSMUSG00000111077	ENSMUST00000216441			Gm48743			TEC
e11ve16_cond1_1420	chr10	9053564	9054499	+	6.01411	NA	Intergenic	Intergenic	17444	ENSMUST00000216441.1	ENSMUSG00000111077	ENSMUST00000216441			Gm48743			TEC
e11ve16_cond1_1421	chr10	9399575	9400627	+	9.20614	NA	Intergenic	Intergenic	43946	ENSMUST00000217850.1	ENSMUSG00000112048	ENSMUST00000217850			Gm48750			processed_pseudogene
e11ve16_cond1_1422	chr10	9557327	9558180	+	11.0719	NA	Intergenic	Intergenic	-8623	ENSMUST00000218493.1	ENSMUSG00000112700	ENSMUST00000218493			Gm48757			lncRNA
e11ve16_cond1_1423	chr10	9834749	9835848	+	5.26027	NA	intron (ENSMUST00000141722.7, intron 8 of 25)	protein_coding-intron (ENSMUST00000038213.13, intron 8 of 27)	-15713	ENSMUST00000219200.1	ENSMUSG00000019790	ENSMUST00000139199			Stxbp5			protein_coding
e11ve16_cond1_1424	chr10	10570998	10571218	+	5.0367	NA	Intergenic	Intergenic	-12843	ENSMUST00000019974.4	ENSMUSG00000019832	ENSMUST00000220018			Rab32			protein_coding
e11ve16_cond1_1425	chr10	10689050	10689766	+	5.21591	NA	exon (ENSMUST00000105561.8, exon 10 of 10)	protein_coding-exon (ENSMUST00000105561.8, exon 10 of 10)	8060	ENSMUST00000105564.1	ENSMUSG00000078481	ENSMUST00000105564			Gm10944			protein_coding
e11ve16_cond1_1426	chr10	11024659	11025193	+	4.10798	NA	intron (ENSMUST00000044306.12, intron 2 of 8)	protein_coding-intron (ENSMUST00000044306.12, intron 2 of 8)	-10990	ENSMUST00000218933.1	ENSMUSG00000111921	ENSMUST00000218933			Gm48406			processed_pseudogene
e11ve16_cond1_1427	chr10	11025935	11027210	+	9.236	NA	intron (ENSMUST00000044306.12, intron 2 of 8)	protein_coding-intron (ENSMUST00000044306.12, intron 2 of 8)	-9344	ENSMUST00000218933.1	ENSMUSG00000111921	ENSMUST00000218933			Gm48406			processed_pseudogene
e11ve16_cond1_1428	chr10	11081866	11082270	+	3.27055	NA	intron (ENSMUST00000044306.12, intron 1 of 8)	protein_coding-intron (ENSMUST00000044306.12, intron 1 of 8)	182	ENSMUST00000156826.1	ENSMUSG00000019828	ENSMUST00000135120			Grm1			protein_coding
e11ve16_cond1_1429	chr10	11229107	11229851	+	4.8555	NA	Intergenic	Intergenic	-16500	ENSMUST00000161579.1	ENSMUSG00000090070	ENSMUST00000161579			Gm16577			lncRNA
e11ve16_cond1_1430	chr10	11243018	11243543	+	5.66447	NA	Intergenic	Intergenic	-30301	ENSMUST00000161579.1	ENSMUSG00000090070	ENSMUST00000161579			Gm16577			lncRNA
e11ve16_cond1_1431	chr10	11282068	11282352	+	4.69111	NA	promoter-TSS (ENSMUST00000181688.1)	lncRNA-promoter-TSS (ENSMUST00000181688.1)	623	ENSMUST00000070300.4	ENSMUSG00000047648	ENSMUST00000070300			Fbxo30			protein_coding
e11ve16_cond1_1432	chr10	11967479	11968488	+	5.86883	NA	Intergenic	Intergenic	8103	ENSMUST00000158398.1	ENSMUSG00000089023	ENSMUST00000158398			Gm25011			snoRNA
e11ve16_cond1_1433	chr10	12497043	12497569	+	5.07067	NA	intron (ENSMUST00000217994.1, intron 4 of 24)	protein_coding-intron (ENSMUST00000076817.4, intron 53 of 73)	51573	ENSMUST00000219003.1	ENSMUSG00000019820	ENSMUST00000219584			Utrn			protein_coding
e11ve16_cond1_1434	chr10	12549023	12549249	+	3.48739	NA	promoter-TSS (ENSMUST00000219003.1)	protein_coding-promoter-TSS (ENSMUST00000219003.1)	-257	ENSMUST00000219003.1	ENSMUSG00000019820	ENSMUST00000219584			Utrn			protein_coding
e11ve16_cond1_1435	chr10	12791103	12791843	+	5.53114	NA	intron (ENSMUST00000219660.1, intron 2 of 17)	protein_coding-intron (ENSMUST00000076817.4, intron 1 of 73)	2501	ENSMUST00000157891.1	ENSMUSG00000088516	ENSMUST00000157891			Gm23044			snRNA
e11ve16_cond1_1436	chr10	12878854	12879768	+	8.03562	NA	Intergenic	Intergenic	-9946	ENSMUST00000218635.1	ENSMUSG00000019820	ENSMUST00000219584			Utrn			protein_coding
e11ve16_cond1_1437	chr10	12930671	12931168	+	4.11046	NA	Intergenic	Intergenic	-7829	ENSMUST00000181073.8	ENSMUSG00000097378	ENSMUST00000181073			B230208H11Rik			lncRNA
e11ve16_cond1_1438	chr10	12964366	12964741	+	3.38211	NA	promoter-TSS (ENSMUST00000042861.6)	protein_coding-promoter-TSS (ENSMUST00000042861.6)	-255	ENSMUST00000218685.1	ENSMUSG00000039232	ENSMUST00000042861			Stx11			protein_coding
e11ve16_cond1_1439	chr10	13047797	13048102	+	4.45822	NA	intron (ENSMUST00000219965.1, intron 1 of 1)	lncRNA-intron (ENSMUST00000219965.1, intron 1 of 1)	3436	ENSMUST00000219965.1	ENSMUSG00000112498	ENSMUST00000219965			Gm47691			lncRNA
e11ve16_cond1_1440	chr10	13061034	13061835	+	7.7396	NA	intron (ENSMUST00000193426.5, intron 1 of 7)	protein_coding-intron (ENSMUST00000193426.5, intron 1 of 7)	930	ENSMUST00000193426.5	ENSMUSG00000019817	ENSMUST00000126880			Plagl1			protein_coding
e11ve16_cond1_1441	chr10	13106872	13107954	+	7.23885	NA	intron (ENSMUST00000135095.7, intron 2 of 2)	protein_coding-intron (ENSMUST00000135826.7, intron 2 of 4)	-6052	ENSMUST00000130313.1	ENSMUSG00000019817	ENSMUST00000126880			Plagl1			protein_coding
e11ve16_cond1_1442	chr10	13210063	13210736	+	5.05144	NA	exon (ENSMUST00000105545.11, exon 13 of 13)	protein_coding-exon (ENSMUST00000105545.11, exon 13 of 13)	5173	ENSMUST00000219030.1	ENSMUSG00000112042	ENSMUST00000219030			Gm47402			processed_pseudogene
e11ve16_cond1_1443	chr10	13429725	13430537	+	4.14886	NA	intron (ENSMUST00000105545.11, intron 1 of 12)	protein_coding-intron (ENSMUST00000105545.11, intron 1 of 12)	-41161	ENSMUST00000079698.6	ENSMUSG00000062866	ENSMUST00000105543			Phactr2			protein_coding
e11ve16_cond1_1444	chr10	13564564	13564817	+	4.59314	NA	Intergenic	Intergenic	-11548	ENSMUST00000170376.7	ENSMUSG00000019809	ENSMUST00000019945			Pex3			protein_coding
e11ve16_cond1_1445	chr10	14056230	14056551	+	3.82758	NA	intron (ENSMUST00000191464.1, intron 2 of 3)	protein_coding-intron (ENSMUST00000015645.10, intron 1 of 8)	89366	ENSMUST00000191464.1	ENSMUSG00000015501	ENSMUST00000186989			Hivep2			protein_coding
e11ve16_cond1_1446	chr10	14418148	14418359	+	3.78252	NA	intron (ENSMUST00000208429.2, intron 22 of 24)	protein_coding-intron (ENSMUST00000041168.5, intron 21 of 24)	90842	ENSMUST00000218527.1	ENSMUSG00000112225	ENSMUST00000218527			Gm48854			lncRNA
e11ve16_cond1_1447	chr10	14522436	14522787	+	5.1881	NA	promoter-TSS (ENSMUST00000096020.6)	processed_pseudogene-promoter-TSS (ENSMUST00000096020.6)	-467	ENSMUST00000096020.6	ENSMUSG00000071532	ENSMUST00000096020			Gm10335			processed_pseudogene
e11ve16_cond1_1448	chr10	14760487	14760776	+	3.49653	NA	promoter-TSS (ENSMUST00000181479.1)	lncRNA-promoter-TSS (ENSMUST00000181479.1)	89	ENSMUST00000181479.1	ENSMUSG00000096963	ENSMUST00000181479			B230364G03Rik			lncRNA
e11ve16_cond1_1449	chr10	14860751	14861323	+	7.19885	NA	Intergenic	Intergenic	-70823	ENSMUST00000218504.1	ENSMUSG00000112724	ENSMUST00000218504			Gm47699			processed_pseudogene
e11ve16_cond1_1450	chr10	15591979	15592390	+	6.89453	NA	Intergenic	Intergenic	-8043	ENSMUST00000219416.1	ENSMUSG00000112089	ENSMUST00000219416			Gm47712			lncRNA
e11ve16_cond1_1451	chr10	15676502	15677051	+	3.84687	NA	intron (ENSMUST00000219416.1, intron 1 of 1)	lncRNA-intron (ENSMUST00000219416.1, intron 1 of 1)	5852	ENSMUST00000219927.1	ENSMUSG00000112335	ENSMUST00000219927			Gm46188			processed_pseudogene
e11ve16_cond1_1452	chr10	15759735	15759986	+	6.4707	NA	intron (ENSMUST00000219541.1, intron 1 of 2)	lncRNA-intron (ENSMUST00000217765.1, intron 1 of 1)	130	ENSMUST00000219541.1	ENSMUSG00000112800	ENSMUST00000219541			Gm40604			lncRNA
e11ve16_cond1_1453	chr10	15760238	15760457	+	3.88835	NA	promoter-TSS (ENSMUST00000217765.1)	lncRNA-promoter-TSS (ENSMUST00000217765.1)	-335	ENSMUST00000217765.1	ENSMUSG00000112800	ENSMUST00000219541			Gm40604			lncRNA
e11ve16_cond1_1454	chr10	17175033	17175483	+	3.75361	NA	Intergenic	Intergenic	58454	ENSMUST00000157811.1	ENSMUSG00000088436	ENSMUST00000157811			Gm25382			snRNA
e11ve16_cond1_1455	chr10	17229970	17230354	+	5.03525	NA	Intergenic	Intergenic	91449	ENSMUST00000219259.1	ENSMUSG00000112478	ENSMUST00000219259			Gm47761			lncRNA
e11ve16_cond1_1456	chr10	17236308	17236586	+	5.13304	NA	Intergenic	Intergenic	85164	ENSMUST00000219259.1	ENSMUSG00000112478	ENSMUST00000219259			Gm47761			lncRNA
e11ve16_cond1_1457	chr10	17331516	17332304	+	7.77215	NA	intron (ENSMUST00000220296.1, intron 1 of 2)	lncRNA-intron (ENSMUST00000220296.1, intron 1 of 2)	967	ENSMUST00000220296.1	ENSMUSG00000111922	ENSMUST00000220296			Gm47760			lncRNA
e11ve16_cond1_1458	chr10	17333477	17334143	+	3.82848	NA	promoter-TSS (ENSMUST00000220296.1)	lncRNA-promoter-TSS (ENSMUST00000220296.1)	-933	ENSMUST00000220296.1	ENSMUSG00000111922	ENSMUST00000220296			Gm47760			lncRNA
e11ve16_cond1_1459	chr10	17947297	17948060	+	13.393	NA	exon (ENSMUST00000037879.7, exon 1 of 4)	protein_coding-exon (ENSMUST00000037879.7, exon 1 of 4)	389	ENSMUST00000037879.7	ENSMUSG00000039879	ENSMUST00000217949			Heca			protein_coding
e11ve16_cond1_1460	chr10	18055856	18056063	+	4.3901	NA	promoter-TSS (ENSMUST00000126390.7)	protein_coding-promoter-TSS (ENSMUST00000126390.7)	0	ENSMUST00000216413.1	ENSMUSG00000019854	ENSMUST00000126390			Reps1			protein_coding
e11ve16_cond1_1461	chr10	18329008	18329532	+	3.85831	NA	intron (ENSMUST00000207038.1, intron 1 of 6)	protein_coding-intron (ENSMUST00000207038.1, intron 1 of 6)	7971	ENSMUST00000213578.1	ENSMUSG00000111313	ENSMUST00000213578			Gm18942			processed_pseudogene
e11ve16_cond1_1462	chr10	18370166	18372039	+	8.07429	NA	intron (ENSMUST00000207038.1, intron 1 of 6)	protein_coding-intron (ENSMUST00000207038.1, intron 1 of 6)	-19220	ENSMUST00000159299.7	ENSMUSG00000039835	ENSMUST00000162891			Nhsl1			protein_coding
e11ve16_cond1_1463	chr10	18407881	18408432	+	3.73533	NA	exon (ENSMUST00000037341.13, exon 1 of 7)	protein_coding-exon (ENSMUST00000037341.13, exon 1 of 7)	481	ENSMUST00000160602.7	ENSMUSG00000039835	ENSMUST00000162891			Nhsl1			protein_coding
e11ve16_cond1_1464	chr10	18445959	18446670	+	7.08692	NA	intron (ENSMUST00000037341.13, intron 1 of 6)	protein_coding-intron (ENSMUST00000037341.13, intron 1 of 6)	-23574	ENSMUST00000160547.1	ENSMUSG00000039835	ENSMUST00000162891			Nhsl1			protein_coding
e11ve16_cond1_1465	chr10	18549352	18549582	+	5.84436	NA	Intergenic	Intergenic	-3391	ENSMUST00000020000.6	ENSMUSG00000019853	ENSMUST00000214548			Hebp2			protein_coding
e11ve16_cond1_1466	chr10	18899751	18899951	+	5.88417	NA	Intergenic	Intergenic	-12822	ENSMUST00000214387.1	ENSMUSG00000111318	ENSMUST00000214387			Gm48483			lncRNA
e11ve16_cond1_1467	chr10	19014526	19014868	+	3.58217	NA	promoter-TSS (ENSMUST00000146388.1)	protein_coding-promoter-TSS (ENSMUST00000146388.1)	-115	ENSMUST00000146388.1	ENSMUSG00000019850	ENSMUST00000122863			Tnfaip3			protein_coding
e11ve16_cond1_1468	chr10	19187777	19188009	+	3.86586	NA	intron (ENSMUST00000216683.1, intron 1 of 1)	lncRNA-intron (ENSMUST00000216041.1, intron 2 of 3)	20655	ENSMUST00000216683.1	ENSMUSG00000111052	ENSMUST00000216683			Gm20139			lncRNA
e11ve16_cond1_1469	chr10	19849675	19850591	+	4.61044	NA	intron (ENSMUST00000059805.5, intron 1 of 1)	protein_coding-intron (ENSMUST00000059805.5, intron 1 of 1)	1326	ENSMUST00000059805.5	ENSMUSG00000050473	ENSMUST00000059805			Slc35d3			protein_coding
e11ve16_cond1_1470	chr10	19850766	19851145	+	4.2032	NA	exon (ENSMUST00000059805.5, exon 1 of 2)	protein_coding-exon (ENSMUST00000059805.5, exon 1 of 2)	504	ENSMUST00000059805.5	ENSMUSG00000050473	ENSMUST00000059805			Slc35d3			protein_coding
e11ve16_cond1_1471	chr10	20114756	20115232	+	18.9071	NA	intron (ENSMUST00000120259.7, intron 20 of 28)	protein_coding-intron (ENSMUST00000095806.9, intron 21 of 29)	-9807	ENSMUST00000156369.1	ENSMUSG00000071369	ENSMUST00000129437			Map3k5			protein_coding
e11ve16_cond1_1472	chr10	20285466	20286747	+	8.65269	NA	intron (ENSMUST00000213372.1, intron 1 of 4)	lncRNA-intron (ENSMUST00000213372.1, intron 1 of 4)	520	ENSMUST00000215889.1	ENSMUSG00000111447	ENSMUST00000217535			Gm48249			lncRNA
e11ve16_cond1_1473	chr10	20348286	20348531	+	4.15602	NA	exon (ENSMUST00000169712.2, exon 2 of 7)	protein_coding-exon (ENSMUST00000169712.2, exon 2 of 7)	401	ENSMUST00000213374.1	ENSMUSG00000019992	ENSMUST00000217608			Mtfr2			protein_coding
e11ve16_cond1_1474	chr10	20662540	20663095	+	6.53377	NA	intron (ENSMUST00000170683.7, intron 1 of 2)	protein_coding-intron (ENSMUST00000020165.13, intron 1 of 12)	37182	ENSMUST00000171194.1	ENSMUSG00000091730	ENSMUST00000171194			Gm17230			processed_pseudogene
e11ve16_cond1_1475	chr10	20695547	20695770	+	3.37875	NA	intron (ENSMUST00000170683.7, intron 1 of 2)	protein_coding-intron (ENSMUST00000020165.13, intron 1 of 12)	29038	ENSMUST00000170265.7	ENSMUSG00000019990	ENSMUST00000164195			Pde7b			protein_coding
e11ve16_cond1_1476	chr10	21159971	21160596	+	4.69661	NA	intron (ENSMUST00000186446.1, intron 1 of 13)	protein_coding-intron (ENSMUST00000020158.8, intron 1 of 14)	567	ENSMUST00000186446.1	ENSMUSG00000019982	ENSMUST00000216751			Myb			protein_coding
e11ve16_cond1_1477	chr10	21174923	21175372	+	8.67336	NA	Intergenic	Intergenic	-7548	ENSMUST00000215633.1	ENSMUSG00000111005	ENSMUST00000215633			Gm33619			lncRNA
e11ve16_cond1_1478	chr10	21287415	21288038	+	4.77845	NA	Intergenic	Intergenic	-1493	ENSMUST00000182266.1	ENSMUSG00000098102	ENSMUST00000182266			Gm2467			processed_pseudogene
e11ve16_cond1_1479	chr10	21789976	21790271	+	4.43862	NA	Intergenic	Intergenic	46256	ENSMUST00000189792.1	ENSMUSG00000099749	ENSMUST00000189792			Gm29323			lncRNA
e11ve16_cond1_1480	chr10	21882251	21882885	+	5.4895	NA	exon (ENSMUST00000120509.7, exon 1 of 14)	protein_coding-exon (ENSMUST00000120509.7, exon 1 of 14)	199	ENSMUST00000143094.1	ENSMUSG00000019970	ENSMUST00000143094			Sgk1			protein_coding
e11ve16_cond1_1481	chr10	21883505	21883817	+	3.69171	NA	intron (ENSMUST00000120509.7, intron 1 of 13)	protein_coding-intron (ENSMUST00000120509.7, intron 1 of 13)	1292	ENSMUST00000143094.1	ENSMUSG00000019970	ENSMUST00000143094			Sgk1			protein_coding
e11ve16_cond1_1482	chr10	22149475	22149677	+	4.39867	NA	promoter-TSS (ENSMUST00000069372.6)	protein_coding-promoter-TSS (ENSMUST00000069372.6)	-306	ENSMUST00000069372.6	ENSMUSG00000097327	ENSMUST00000181677			E030030I06Rik			protein_coding
e11ve16_cond1_1483	chr10	22150077	22150395	+	4.64509	NA	promoter-TSS (ENSMUST00000069372.6)	protein_coding-promoter-TSS (ENSMUST00000069372.6)	-966	ENSMUST00000069372.6	ENSMUSG00000097327	ENSMUST00000181677			E030030I06Rik			protein_coding
e11ve16_cond1_1484	chr10	22150501	22151566	+	5.56055	NA	Intergenic	Intergenic	-1763	ENSMUST00000069372.6	ENSMUSG00000097327	ENSMUST00000181677			E030030I06Rik			protein_coding
e11ve16_cond1_1485	chr10	22159268	22159845	+	5.37738	NA	intron (ENSMUST00000105522.8, intron 1 of 5)	protein_coding-intron (ENSMUST00000105522.8, intron 1 of 5)	970	ENSMUST00000105522.8	ENSMUSG00000075297	ENSMUST00000131558			H60b			protein_coding
e11ve16_cond1_1486	chr10	22172838	22173062	+	4.499	NA	promoter-TSS (ENSMUST00000065527.10)	protein_coding-promoter-TSS (ENSMUST00000065527.10)	-571	ENSMUST00000065527.10	ENSMUSG00000053219	ENSMUST00000181645			Raet1e			protein_coding
e11ve16_cond1_1487	chr10	22190738	22191133	+	5.42797	NA	intron (ENSMUST00000180456.1, intron 3 of 3)	protein_coding-intron (ENSMUST00000105522.8, intron 1 of 5)	17016	ENSMUST00000178026.1	ENSMUSG00000053219	ENSMUST00000181645			Raet1e			protein_coding
e11ve16_cond1_1488	chr10	22274494	22274710	+	4.37845	NA	intron (ENSMUST00000131558.1, intron 1 of 5)	protein_coding-intron (ENSMUST00000105522.8, intron 1 of 5)	1256	ENSMUST00000131558.1	ENSMUSG00000075297	ENSMUST00000131558			H60b			protein_coding
e11ve16_cond1_1489	chr10	22607605	22607822	+	6.35916	NA	Intergenic	Intergenic	-37298	ENSMUST00000042261.4	ENSMUSG00000037490	ENSMUST00000042261			Slc2a12			protein_coding
e11ve16_cond1_1490	chr10	22658989	22659459	+	6.53475	NA	intron (ENSMUST00000159174.1, intron 1 of 1)	protein_coding-intron (ENSMUST00000042261.4, intron 1 of 4)	10216	ENSMUST00000159174.1	ENSMUSG00000037490	ENSMUST00000042261			Slc2a12			protein_coding
e11ve16_cond1_1491	chr10	22820047	22820247	+	4.21083	NA	promoter-TSS (ENSMUST00000049930.8)	protein_coding-promoter-TSS (ENSMUST00000049930.8)	12	ENSMUST00000218002.1	ENSMUSG00000045680	ENSMUST00000218002			Tcf21			protein_coding
e11ve16_cond1_1492	chr10	22843930	22844349	+	4.95655	NA	Intergenic	Intergenic	-23965	ENSMUST00000049930.8	ENSMUSG00000045680	ENSMUST00000218002			Tcf21			protein_coding
e11ve16_cond1_1493	chr10	23097396	23097981	+	9.30459	NA	Intergenic	Intergenic	17508	ENSMUST00000218867.1	ENSMUSG00000010461	ENSMUST00000220299			Eya4			protein_coding
e11ve16_cond1_1494	chr10	23348752	23349051	+	7.84035	NA	intron (ENSMUST00000074366.6, intron 1 of 18)	protein_coding-intron (ENSMUST00000074366.6, intron 1 of 18)	986	ENSMUST00000074366.6	ENSMUSG00000010461	ENSMUST00000220299			Eya4			protein_coding
e11ve16_cond1_1495	chr10	23349463	23349839	+	4.24757	NA	intron (ENSMUST00000074366.6, intron 1 of 18)	protein_coding-intron (ENSMUST00000074366.6, intron 1 of 18)	236	ENSMUST00000074366.6	ENSMUSG00000010461	ENSMUST00000220299			Eya4			protein_coding
e11ve16_cond1_1496	chr10	24210934	24211215	+	4.03701	NA	Intergenic	Intergenic	-12443	ENSMUST00000095784.2	ENSMUSG00000020000	ENSMUST00000095784			Moxd1			protein_coding
e11ve16_cond1_1497	chr10	24284487	24284930	+	4.9228	NA	intron (ENSMUST00000095784.2, intron 8 of 11)	protein_coding-intron (ENSMUST00000095784.2, intron 8 of 11)	61163	ENSMUST00000154916.1	ENSMUSG00000020000	ENSMUST00000095784			Moxd1			protein_coding
e11ve16_cond1_1498	chr10	24741375	24742488	+	11.5616	NA	Intergenic	Intergenic	-29772	ENSMUST00000039882.12	ENSMUSG00000037370	ENSMUST00000150570			Enpp1			protein_coding
e11ve16_cond1_1499	chr10	24835749	24836178	+	3.95157	NA	intron (ENSMUST00000219968.1, intron 1 of 4)	protein_coding-intron (ENSMUST00000219968.1, intron 1 of 4)	150	ENSMUST00000218619.1	ENSMUSG00000019989	ENSMUST00000020169			Enpp3			protein_coding
e11ve16_cond1_1500	chr10	24927543	24927909	+	4.02312	NA	promoter-TSS (ENSMUST00000020161.9)	protein_coding-promoter-TSS (ENSMUST00000020161.9)	107	ENSMUST00000219852.1	ENSMUSG00000112758	ENSMUST00000219852			Gm36172			lncRNA
e11ve16_cond1_1501	chr10	25111012	25111229	+	5.45271	NA	Intergenic	Intergenic	56980	ENSMUST00000175541.1	ENSMUSG00000093282	ENSMUST00000175541			Gm22566			miRNA
e11ve16_cond1_1502	chr10	25313933	25314529	+	6.61628	NA	Intergenic	Intergenic	-6361	ENSMUST00000176231.1	ENSMUSG00000039166	ENSMUST00000095779			Akap7			protein_coding
e11ve16_cond1_1503	chr10	25386841	25387493	+	4.10676	NA	intron (ENSMUST00000218903.1, intron 1 of 17)	protein_coding-intron (ENSMUST00000053748.15, intron 1 of 19)	-11492	ENSMUST00000219900.1	ENSMUSG00000019978	ENSMUST00000219805			Epb41l2			protein_coding
e11ve16_cond1_1504	chr10	25427084	25427985	+	4.93364	NA	intron (ENSMUST00000219805.1, intron 1 of 10)	protein_coding-intron (ENSMUST00000053748.15, intron 1 of 19)	-5065	ENSMUST00000219224.1	ENSMUSG00000019978	ENSMUST00000219805			Epb41l2			protein_coding
e11ve16_cond1_1505	chr10	25433787	25433987	+	7.96351	NA	intron (ENSMUST00000219166.1, intron 1 of 1)	protein_coding-intron (ENSMUST00000219224.1, intron 1 of 1)	1271	ENSMUST00000219166.1	ENSMUSG00000019978	ENSMUST00000219805			Epb41l2			protein_coding
e11ve16_cond1_1506	chr10	25731786	25732172	+	6.26959	NA	Intergenic	Intergenic	-24036	ENSMUST00000217933.1	ENSMUSG00000112803	ENSMUST00000217933			Gm36543			lncRNA
e11ve16_cond1_1507	chr10	25883429	25883638	+	5.82568	NA	promoter-TSS (ENSMUST00000219770.1)	processed_pseudogene-promoter-TSS (ENSMUST00000219770.1)	-140	ENSMUST00000219770.1	ENSMUSG00000112861	ENSMUST00000219770			Gm47930			processed_pseudogene
e11ve16_cond1_1508	chr10	25908201	25908859	+	6.54908	NA	Intergenic	Intergenic	9251	ENSMUST00000219283.1	ENSMUSG00000112324	ENSMUST00000219283			Gm47939			lncRNA
e11ve16_cond1_1509	chr10	25928002	25928537	+	5.99134	NA	intron (ENSMUST00000217910.1, intron 2 of 2)	protein_coding-intron (ENSMUST00000217910.1, intron 2 of 2)	28990	ENSMUST00000219283.1	ENSMUSG00000112324	ENSMUST00000219283			Gm47939			lncRNA
e11ve16_cond1_1510	chr10	26078067	26078928	+	5.26136	NA	promoter-TSS (ENSMUST00000219338.1)	protein_coding-promoter-TSS (ENSMUST00000219338.1)	153	ENSMUST00000217910.1	ENSMUSG00000049420	ENSMUST00000217910			Tmem200a			protein_coding
e11ve16_cond1_1511	chr10	26870672	26870957	+	4.58071	NA	intron (ENSMUST00000039557.8, intron 6 of 14)	protein_coding-intron (ENSMUST00000039557.8, intron 6 of 14)	7472	ENSMUST00000142284.1	ENSMUSG00000039031	ENSMUST00000135866			Arhgap18			protein_coding
e11ve16_cond1_1512	chr10	26883473	26883916	+	14.1709	NA	intron (ENSMUST00000142284.1, intron 6 of 10)	protein_coding-intron (ENSMUST00000039557.8, intron 10 of 14)	20352	ENSMUST00000142284.1	ENSMUSG00000039031	ENSMUST00000135866			Arhgap18			protein_coding
e11ve16_cond1_1513	chr10	26919826	26920814	+	8.51228	NA	Intergenic	Intergenic	-29420	ENSMUST00000220276.1	ENSMUSG00000112751	ENSMUST00000220276			Gm48084			lncRNA
e11ve16_cond1_1514	chr10	27063513	27064003	+	4.44029	NA	intron (ENSMUST00000092639.11, intron 41 of 64)	protein_coding-intron (ENSMUST00000092639.11, intron 41 of 64)	-7113	ENSMUST00000219763.1	ENSMUSG00000019899	ENSMUST00000186965			Lama2			protein_coding
e11ve16_cond1_1515	chr10	27198054	27198280	+	3.5133	NA	intron (ENSMUST00000189575.1, intron 21 of 26)	protein_coding-intron (ENSMUST00000092639.11, intron 21 of 64)	14087	ENSMUST00000239098.1	ENSMUSG00000019899	ENSMUST00000186965			Lama2			protein_coding
e11ve16_cond1_1516	chr10	27737429	27738288	+	5.13952	NA	Intergenic	Intergenic	-39531	ENSMUST00000218769.1	ENSMUSG00000112610	ENSMUST00000218769			Gm30165			lncRNA
e11ve16_cond1_1517	chr10	28119060	28119262	+	3.84372	NA	intron (ENSMUST00000218584.1, intron 1 of 13)	protein_coding-intron (ENSMUST00000166468.1, intron 1 of 31)	44151	ENSMUST00000219761.1	ENSMUSG00000019889	ENSMUST00000219107			Ptprk			protein_coding
e11ve16_cond1_1518	chr10	28204762	28205642	+	5.97197	NA	intron (ENSMUST00000218584.1, intron 1 of 13)	protein_coding-intron (ENSMUST00000166468.1, intron 1 of 31)	8919	ENSMUST00000102422.1	ENSMUSG00000076377	ENSMUST00000102422			Gm22370			miRNA
e11ve16_cond1_1519	chr10	29147601	29147818	+	4.08134	NA	promoter-TSS (ENSMUST00000213451.1)	protein_coding-promoter-TSS (ENSMUST00000213451.1)	-12	ENSMUST00000213451.1	ENSMUSG00000038916	ENSMUST00000092629			Soga3			protein_coding
e11ve16_cond1_1520	chr10	29533050	29533593	+	5.63282	NA	intron (ENSMUST00000092623.4, intron 1 of 4)	protein_coding-intron (ENSMUST00000092623.4, intron 1 of 4)	-1396	ENSMUST00000215560.1	ENSMUSG00000110831	ENSMUST00000215560			Gm48159			lncRNA
e11ve16_cond1_1521	chr10	29534478	29534895	+	3.92376	NA	promoter-TSS (ENSMUST00000215560.1)	lncRNA-promoter-TSS (ENSMUST00000215560.1)	-31	ENSMUST00000215560.1	ENSMUSG00000110831	ENSMUST00000215560			Gm48159			lncRNA
e11ve16_cond1_1522	chr10	29535838	29536070	+	4.14035	NA	promoter-TSS (ENSMUST00000092623.4)	protein_coding-promoter-TSS (ENSMUST00000092623.4)	-87	ENSMUST00000092623.4	ENSMUSG00000019880	ENSMUST00000092623			Rspo3			protein_coding
e11ve16_cond1_1523	chr10	29851375	29851693	+	6.57759	NA	Intergenic	Intergenic	70123	ENSMUST00000215034.1	ENSMUSG00000111427	ENSMUST00000215034			Gm6390			processed_pseudogene
e11ve16_cond1_1524	chr10	30415278	30416271	+	8.37067	NA	Intergenic	Intergenic	42501	ENSMUST00000213206.1	ENSMUSG00000111047	ENSMUST00000213206			Gm4780			transcribed_processed_pseudogene
e11ve16_cond1_1525	chr10	30600134	30600384	+	5.59391	NA	intron (ENSMUST00000216790.1, intron 1 of 6)	protein_coding-intron (ENSMUST00000019927.6, intron 1 of 12)	391	ENSMUST00000216705.1	ENSMUSG00000019792	ENSMUST00000215595			Trmt11			protein_coding
e11ve16_cond1_1526	chr10	30843438	30844001	+	5.40278	NA	promoter-TSS (ENSMUST00000019924.8)	protein_coding-promoter-TSS (ENSMUST00000019924.8)	-918	ENSMUST00000019924.8	ENSMUSG00000019789	ENSMUST00000217504			Hey2			protein_coding
e11ve16_cond1_1527	chr10	30980278	30980535	+	4.40034	NA	Intergenic	Intergenic	-37921	ENSMUST00000178825.1	ENSMUSG00000094008	ENSMUST00000178825			Gm24168			snRNA
e11ve16_cond1_1528	chr10	30985193	30985510	+	3.73993	NA	Intergenic	Intergenic	-42866	ENSMUST00000178825.1	ENSMUSG00000094008	ENSMUST00000178825			Gm24168			snRNA
e11ve16_cond1_1529	chr10	31298795	31299141	+	3.70524	NA	Intergenic	Intergenic	-14415	ENSMUST00000000304.13	ENSMUSG00000000295	ENSMUST00000160447			Hddc2			protein_coding
e11ve16_cond1_1530	chr10	33547402	33547792	+	3.73374	NA	intron (ENSMUST00000019920.12, intron 3 of 5)	protein_coding-intron (ENSMUST00000019920.12, intron 3 of 5)	36232	ENSMUST00000219677.1	ENSMUSG00000112248	ENSMUST00000219677			Gm47910			TEC
e11ve16_cond1_1531	chr10	33623932	33624507	+	6.67833	NA	promoter-TSS (ENSMUST00000159533.8)	protein_coding-promoter-TSS (ENSMUST00000159533.8)	-23	ENSMUST00000159533.8	ENSMUSG00000019785	ENSMUST00000019920			Clvs2			protein_coding
e11ve16_cond1_1532	chr10	34206547	34207014	+	3.78669	NA	intron (ENSMUST00000215547.1, intron 1 of 2)	protein_coding-intron (ENSMUST00000048010.8, intron 1 of 5)	297	ENSMUST00000216194.1	ENSMUSG00000039497	ENSMUST00000215547			Dse			protein_coding
e11ve16_cond1_1533	chr10	34281468	34281721	+	3.2716	NA	promoter-TSS (ENSMUST00000061372.6)	protein_coding-promoter-TSS (ENSMUST00000061372.6)	-596	ENSMUST00000061372.6	ENSMUSG00000047514	ENSMUST00000061372			Tspyl1			protein_coding
e11ve16_cond1_1534	chr10	34300477	34300816	+	12.0673	NA	exon (ENSMUST00000047935.7, exon 1 of 1)	protein_coding-exon (ENSMUST00000047935.7, exon 1 of 1)	1390	ENSMUST00000213791.1	ENSMUSG00000039485	ENSMUST00000213791			Tspyl4			protein_coding
e11ve16_cond1_1535	chr10	34373120	34373654	+	7.7998	NA	intron (ENSMUST00000130290.1, intron 5 of 10)	protein_coding-intron (ENSMUST00000047885.13, intron 6 of 11)	-16594	ENSMUST00000105511.1	ENSMUSG00000039462	ENSMUST00000105511			Col10a1			protein_coding
e11ve16_cond1_1536	chr10	35056923	35057359	+	4.35497	NA	intron (ENSMUST00000214886.1, intron 2 of 3)	transcribed_processed_pseudogene-intron (ENSMUST00000214886.1, intron 2 of 3)	-55057	ENSMUST00000104561.1	ENSMUSG00000077749	ENSMUST00000104561			Gm26341			snoRNA
e11ve16_cond1_1537	chr10	35713745	35714239	+	4.98828	NA	Intergenic	Intergenic	-2100	ENSMUST00000080898.3	ENSMUSG00000063953	ENSMUST00000080898			Amd2			protein_coding
e11ve16_cond1_1538	chr10	35714668	35715221	+	7.3288	NA	Intergenic	Intergenic	-3052	ENSMUST00000080898.3	ENSMUSG00000063953	ENSMUST00000080898			Amd2			protein_coding
e11ve16_cond1_1539	chr10	36287453	36287871	+	5.38288	NA	Intergenic	Intergenic	-103930	ENSMUST00000214163.1	ENSMUSG00000110731	ENSMUST00000214163			Gm47049			lncRNA
e11ve16_cond1_1540	chr10	36506257	36506706	+	4.37321	NA	promoter-TSS (ENSMUST00000058738.10)	protein_coding-promoter-TSS (ENSMUST00000058738.10)	-333	ENSMUST00000167191.7	ENSMUSG00000044499	ENSMUST00000172357			Hs3st5			protein_coding
e11ve16_cond1_1541	chr10	36507336	36507932	+	4.34785	NA	intron (ENSMUST00000172357.7, intron 1 of 2)	protein_coding-intron (ENSMUST00000058738.10, intron 1 of 5)	227	ENSMUST00000171521.1	ENSMUSG00000044499	ENSMUST00000172357			Hs3st5			protein_coding
e11ve16_cond1_1542	chr10	37261063	37261284	+	3.60037	NA	Intergenic	Intergenic	2575	ENSMUST00000217044.1	ENSMUSG00000110799	ENSMUST00000217044			4930543K20Rik			lncRNA
e11ve16_cond1_1543	chr10	37279511	37279746	+	3.72759	NA	Intergenic	Intergenic	-15880	ENSMUST00000217044.1	ENSMUSG00000110799	ENSMUST00000217044			4930543K20Rik			lncRNA
e11ve16_cond1_1544	chr10	37325930	37326322	+	3.4964	NA	Intergenic	Intergenic	-11360	ENSMUST00000181602.1	ENSMUSG00000097742	ENSMUST00000181602			Gm26535			lncRNA
e11ve16_cond1_1545	chr10	38377582	38377811	+	4.9996	NA	Intergenic	Intergenic	56439	ENSMUST00000214608.1	ENSMUSG00000110782	ENSMUST00000214608			Gm48198			processed_pseudogene
e11ve16_cond1_1546	chr10	39171244	39172184	+	8.1531	NA	exon (ENSMUST00000215835.1, exon 1 of 1)	lncRNA-exon (ENSMUST00000215835.1, exon 1 of 1)	1538	ENSMUST00000215835.1	ENSMUSG00000111055	ENSMUST00000215835			D030034A15Rik			lncRNA
e11ve16_cond1_1547	chr10	39370315	39370536	+	3.35715	NA	intron (ENSMUST00000126486.7, intron 1 of 12)	protein_coding-intron (ENSMUST00000063091.12, intron 1 of 13)	622	ENSMUST00000126486.7	ENSMUSG00000019843	ENSMUST00000148152			Fyn			protein_coding
e11ve16_cond1_1548	chr10	39385821	39386440	+	4.66207	NA	intron (ENSMUST00000126486.7, intron 1 of 12)	protein_coding-intron (ENSMUST00000063091.12, intron 1 of 13)	16327	ENSMUST00000126486.7	ENSMUSG00000019843	ENSMUST00000148152			Fyn			protein_coding
e11ve16_cond1_1549	chr10	39462120	39462702	+	4.39472	NA	intron (ENSMUST00000146287.7, intron 2 of 12)	protein_coding-intron (ENSMUST00000063091.12, intron 3 of 13)	7496	ENSMUST00000146287.7	ENSMUSG00000019843	ENSMUST00000148152			Fyn			protein_coding
e11ve16_cond1_1550	chr10	39490328	39490962	+	6.6041	NA	intron (ENSMUST00000146287.7, intron 2 of 12)	protein_coding-intron (ENSMUST00000063091.12, intron 3 of 13)	-21094	ENSMUST00000136659.1	ENSMUSG00000019843	ENSMUST00000148152			Fyn			protein_coding
e11ve16_cond1_1551	chr10	39541022	39541232	+	4.43839	NA	intron (ENSMUST00000126486.7, intron 11 of 12)	protein_coding-intron (ENSMUST00000063091.12, intron 12 of 13)	7857	ENSMUST00000123205.1	ENSMUSG00000019843	ENSMUST00000148152			Fyn			protein_coding
e11ve16_cond1_1552	chr10	39543659	39543933	+	4.47931	NA	intron (ENSMUST00000126486.7, intron 11 of 12)	protein_coding-intron (ENSMUST00000063091.12, intron 12 of 13)	10526	ENSMUST00000123205.1	ENSMUSG00000019843	ENSMUST00000148152			Fyn			protein_coding
e11ve16_cond1_1553	chr10	39555061	39555755	+	6.88395	NA	TTS (ENSMUST00000153722.1)	lncRNA-TTS (ENSMUST00000153722.1)	2654	ENSMUST00000153722.1	ENSMUSG00000087014	ENSMUST00000153722			Gm16364			lncRNA
e11ve16_cond1_1554	chr10	39658977	39659281	+	4.18641	NA	promoter-TSS (ENSMUST00000214556.1)	TEC-promoter-TSS (ENSMUST00000214556.1)	-703	ENSMUST00000214556.1	ENSMUSG00000111358	ENSMUST00000214556			2900078I11Rik			TEC
e11ve16_cond1_1555	chr10	40500109	40500312	+	4.53594	NA	Intergenic	Intergenic	-48682	ENSMUST00000214826.1	ENSMUSG00000111251	ENSMUST00000214826			Gm18671			processed_pseudogene
e11ve16_cond1_1556	chr10	40629381	40630012	+	4.64539	NA	promoter-TSS (ENSMUST00000019977.7)	protein_coding-promoter-TSS (ENSMUST00000019977.7)	-315	ENSMUST00000019977.7	ENSMUSG00000063428	ENSMUST00000213442			Ddo			protein_coding
e11ve16_cond1_1557	chr10	40646194	40646574	+	5.47491	NA	intron (ENSMUST00000213856.1, intron 3 of 4)	protein_coding-intron (ENSMUST00000019977.7, intron 4 of 4)	14780	ENSMUST00000214618.1	ENSMUSG00000063428	ENSMUST00000213442			Ddo			protein_coding
e11ve16_cond1_1558	chr10	40674354	40674676	+	4.54605	NA	exon (ENSMUST00000213503.1, exon 5 of 5)	protein_coding-exon (ENSMUST00000213503.1, exon 5 of 5)	-8767	ENSMUST00000058747.3	ENSMUSG00000045555	ENSMUST00000058747			Mettl24			protein_coding
e11ve16_cond1_1559	chr10	40883962	40884737	+	7.00712	NA	intron (ENSMUST00000105509.1, intron 1 of 8)	protein_coding-intron (ENSMUST00000019975.13, intron 1 of 8)	522	ENSMUST00000105509.1	ENSMUSG00000019831	ENSMUST00000105509			Wasf1			protein_coding
e11ve16_cond1_1560	chr10	41178801	41179586	+	11.7607	NA	Intergenic	Intergenic	-36852	ENSMUST00000104332.2	ENSMUSG00000093933	ENSMUST00000104332			Gm25526			snoRNA
e11ve16_cond1_1561	chr10	41582825	41583664	+	11.2278	NA	intron (ENSMUST00000179614.8, intron 6 of 20)	protein_coding-intron (ENSMUST00000019955.15, intron 3 of 12)	-4037	ENSMUST00000095227.9	ENSMUSG00000075225	ENSMUST00000095227			Ccdc162			protein_coding
e11ve16_cond1_1562	chr10	41689828	41690302	+	3.91433	NA	exon (ENSMUST00000189488.2, exon 4 of 48)	protein_coding-exon (ENSMUST00000189488.2, exon 4 of 48)	-4009	ENSMUST00000214137.1	ENSMUSG00000111376	ENSMUST00000214137			Gm47099			processed_pseudogene
e11ve16_cond1_1563	chr10	41894237	41894575	+	4.1086	NA	intron (ENSMUST00000099931.10, intron 2 of 9)	protein_coding-intron (ENSMUST00000041438.6, intron 2 of 9)	-3967	ENSMUST00000214835.1	ENSMUSG00000038332	ENSMUST00000099931			Sesn1			protein_coding
e11ve16_cond1_1564	chr10	42072144	42072354	+	5.63935	NA	Intergenic	Intergenic	-16943	ENSMUST00000121229.1	ENSMUSG00000085666	ENSMUST00000121229			Gm9855			processed_pseudogene
e11ve16_cond1_1565	chr10	42140260	42140932	+	5.28423	NA	Intergenic	Intergenic	-85290	ENSMUST00000121229.1	ENSMUSG00000085666	ENSMUST00000121229			Gm9855			processed_pseudogene
e11ve16_cond1_1566	chr10	42371452	42371936	+	29.0239	NA	intron (ENSMUST00000149832.1, intron 2 of 7)	protein_coding-intron (ENSMUST00000041024.14, intron 7 of 12)	-40431	ENSMUST00000120526.1	ENSMUSG00000081873	ENSMUST00000120526			Gm15197			processed_pseudogene
e11ve16_cond1_1567	chr10	42583099	42583816	+	7.99599	NA	promoter-TSS (ENSMUST00000105497.7)	protein_coding-promoter-TSS (ENSMUST00000105497.7)	175	ENSMUST00000019938.10	ENSMUSG00000019803	ENSMUST00000019938			Nr2e1			protein_coding
e11ve16_cond1_1568	chr10	42613303	42613566	+	3.83063	NA	intron (ENSMUST00000144806.7, intron 2 of 6)	protein_coding-intron (ENSMUST00000105497.7, intron 2 of 5)	29596	ENSMUST00000144806.7	ENSMUSG00000038280	ENSMUST00000154048			Ostm1			protein_coding
e11ve16_cond1_1569	chr10	42613775	42614064	+	3.45127	NA	intron (ENSMUST00000144806.7, intron 2 of 6)	protein_coding-intron (ENSMUST00000105497.7, intron 2 of 5)	30081	ENSMUST00000144806.7	ENSMUSG00000038280	ENSMUST00000154048			Ostm1			protein_coding
e11ve16_cond1_1570	chr10	42614245	42614866	+	4.61147	NA	intron (ENSMUST00000144806.7, intron 2 of 6)	protein_coding-intron (ENSMUST00000105497.7, intron 2 of 5)	30717	ENSMUST00000144806.7	ENSMUSG00000038280	ENSMUST00000154048			Ostm1			protein_coding
e11ve16_cond1_1571	chr10	42949932	42950359	+	4.2762	NA	intron (ENSMUST00000127675.1, intron 2 of 3)	protein_coding-intron (ENSMUST00000063063.13, intron 7 of 8)	10264	ENSMUST00000127675.1	ENSMUSG00000044770	ENSMUST00000136841			Scml4			protein_coding
e11ve16_cond1_1572	chr10	42988095	42988359	+	3.5709	NA	Intergenic	Intergenic	-46766	ENSMUST00000213522.1	ENSMUSG00000111171	ENSMUST00000213469			Gm47815			lncRNA
e11ve16_cond1_1573	chr10	42995248	42995892	+	10.2429	NA	Intergenic	Intergenic	-39423	ENSMUST00000213522.1	ENSMUSG00000111171	ENSMUST00000213469			Gm47815			lncRNA
e11ve16_cond1_1574	chr10	43001926	43002434	+	4.54296	NA	TTS (ENSMUST00000040275.8)	protein_coding-TTS (ENSMUST00000040275.8)	-32813	ENSMUST00000213522.1	ENSMUSG00000111171	ENSMUST00000213469			Gm47815			lncRNA
e11ve16_cond1_1575	chr10	43002548	43003018	+	4.29112	NA	exon (ENSMUST00000040275.8, exon 7 of 7)	protein_coding-exon (ENSMUST00000040275.8, exon 7 of 7)	-32210	ENSMUST00000213522.1	ENSMUSG00000111171	ENSMUST00000213469			Gm47815			lncRNA
e11ve16_cond1_1576	chr10	43021101	43021375	+	4.29369	NA	exon (ENSMUST00000040275.8, exon 6 of 7)	protein_coding-exon (ENSMUST00000040275.8, exon 6 of 7)	-13755	ENSMUST00000213522.1	ENSMUSG00000111171	ENSMUST00000213469			Gm47815			lncRNA
e11ve16_cond1_1577	chr10	43112046	43113015	+	9.09056	NA	intron (ENSMUST00000040275.8, intron 4 of 6)	protein_coding-intron (ENSMUST00000040275.8, intron 4 of 6)	-41686	ENSMUST00000187332.1	ENSMUSG00000099893	ENSMUST00000187332			Gm29245			TEC
e11ve16_cond1_1578	chr10	43170996	43171422	+	9.60571	NA	intron (ENSMUST00000040275.8, intron 1 of 6)	protein_coding-intron (ENSMUST00000040275.8, intron 1 of 6)	-2054	ENSMUST00000189221.1	ENSMUSG00000102062	ENSMUST00000189221			Gm29246			lncRNA
e11ve16_cond1_1579	chr10	43173428	43175160	+	7.65794	NA	promoter-TSS (ENSMUST00000053792.1)	lncRNA-promoter-TSS (ENSMUST00000053792.1)	227	ENSMUST00000189987.1	ENSMUSG00000038248	ENSMUST00000189987			Sobp			protein_coding
e11ve16_cond1_1580	chr10	43221975	43222333	+	3.77139	NA	intron (ENSMUST00000095725.10, intron 1 of 7)	protein_coding-intron (ENSMUST00000095725.10, intron 1 of 7)	418	ENSMUST00000162758.1	ENSMUSG00000038240	ENSMUST00000162758			Pdss2			protein_coding
e11ve16_cond1_1581	chr10	43277362	43278363	+	5.74725	NA	intron (ENSMUST00000095725.10, intron 1 of 7)	protein_coding-intron (ENSMUST00000095725.10, intron 1 of 7)	-41498	ENSMUST00000159442.1	ENSMUSG00000089673	ENSMUST00000159442			Gm16546			processed_pseudogene
e11ve16_cond1_1582	chr10	43420995	43421232	+	4.73424	NA	intron (ENSMUST00000159139.7, intron 7 of 7)	protein_coding-intron (ENSMUST00000095725.10, intron 7 of 7)	8582	ENSMUST00000216518.1	ENSMUSG00000110772	ENSMUST00000216518			Gm47856			TEC
e11ve16_cond1_1583	chr10	43439545	43439900	+	6.08677	NA	intron (ENSMUST00000159139.7, intron 7 of 7)	protein_coding-intron (ENSMUST00000095725.10, intron 7 of 7)	16779	ENSMUST00000178135.2	ENSMUSG00000094955	ENSMUST00000178135			Gm3699			processed_pseudogene
e11ve16_cond1_1584	chr10	43477830	43478564	+	5.68601	NA	promoter-TSS (ENSMUST00000040147.7)	protein_coding-promoter-TSS (ENSMUST00000040147.7)	-634	ENSMUST00000167488.8	ENSMUSG00000038214	ENSMUST00000167488			Bend3			protein_coding
e11ve16_cond1_1585	chr10	43478738	43479368	+	5.02788	NA	promoter-TSS (ENSMUST00000040147.7)	protein_coding-promoter-TSS (ENSMUST00000040147.7)	-87	ENSMUST00000040147.7	ENSMUSG00000038214	ENSMUST00000167488			Bend3			protein_coding
e11ve16_cond1_1586	chr10	43527253	43528036	+	5.06244	NA	intron (ENSMUST00000147196.2, intron 3 of 3)	protein_coding-intron (ENSMUST00000147196.2, intron 3 of 3)	-1801	ENSMUST00000152926.1	ENSMUSG00000019797	ENSMUST00000214198			1700021F05Rik			protein_coding
e11ve16_cond1_1587	chr10	43579582	43581248	+	10.0394	NA	intron (ENSMUST00000214476.1, intron 1 of 1)	protein_coding-intron (ENSMUST00000058714.9, intron 1 of 1)	480	ENSMUST00000214476.1	ENSMUSG00000047139	ENSMUST00000214476			Cd24a			protein_coding
e11ve16_cond1_1588	chr10	43651458	43651754	+	5.45217	NA	intron (ENSMUST00000213342.1, intron 3 of 4)	lncRNA-intron (ENSMUST00000213342.1, intron 3 of 4)	-7712	ENSMUST00000214968.1	ENSMUSG00000111565	ENSMUST00000214968			Gm34481			lncRNA
e11ve16_cond1_1589	chr10	43689286	43689572	+	6.15259	NA	intron (ENSMUST00000213342.1, intron 3 of 4)	lncRNA-intron (ENSMUST00000213342.1, intron 3 of 4)	-2127	ENSMUST00000217559.1	ENSMUSG00000111749	ENSMUST00000217559			Gm47927			lncRNA
e11ve16_cond1_1590	chr10	43689710	43690112	+	3.48749	NA	TTS (ENSMUST00000214822.1)	lncRNA-TTS (ENSMUST00000214822.1)	1917	ENSMUST00000214822.1	ENSMUSG00000111575	ENSMUST00000214822			Gm47926			lncRNA
e11ve16_cond1_1591	chr10	43741203	43741629	+	5.55808	NA	exon (ENSMUST00000214129.1, exon 3 of 3)	lncRNA-exon (ENSMUST00000214129.1, exon 3 of 3)	1671	ENSMUST00000214129.1	ENSMUSG00000111377	ENSMUST00000214129			Gm40634			lncRNA
e11ve16_cond1_1592	chr10	43742300	43742818	+	4.78156	NA	intron (ENSMUST00000214129.1, intron 1 of 2)	lncRNA-intron (ENSMUST00000214129.1, intron 1 of 2)	528	ENSMUST00000214129.1	ENSMUSG00000111377	ENSMUST00000214129			Gm40634			lncRNA
e11ve16_cond1_1593	chr10	43815124	43815323	+	3.90808	NA	Intergenic	Intergenic	-6008	ENSMUST00000182071.1	ENSMUSG00000094852	ENSMUST00000182071			Gm9034			processed_pseudogene
e11ve16_cond1_1594	chr10	43815467	43815695	+	4.09983	NA	Intergenic	Intergenic	-5650	ENSMUST00000182071.1	ENSMUSG00000094852	ENSMUST00000182071			Gm9034			processed_pseudogene
e11ve16_cond1_1595	chr10	44459549	44460222	+	5.64883	NA	intron (ENSMUST00000167340.1, intron 1 of 3)	protein_coding-intron (ENSMUST00000167340.1, intron 1 of 3)	-1137	ENSMUST00000039174.10	ENSMUSG00000038151	ENSMUST00000105490			Prdm1			protein_coding
e11ve16_cond1_1596	chr10	44474723	44475426	+	5.3151	NA	intron (ENSMUST00000167340.1, intron 1 of 3)	protein_coding-intron (ENSMUST00000167340.1, intron 1 of 3)	-16326	ENSMUST00000039174.10	ENSMUSG00000038151	ENSMUST00000105490			Prdm1			protein_coding
e11ve16_cond1_1597	chr10	44528623	44528879	+	4.05875	NA	promoter-TSS (ENSMUST00000167340.1)	protein_coding-promoter-TSS (ENSMUST00000167340.1)	-250	ENSMUST00000167340.1	ENSMUSG00000038151	ENSMUST00000105490			Prdm1			protein_coding
e11ve16_cond1_1598	chr10	44659080	44659335	+	4.68013	NA	intron (ENSMUST00000217458.1, intron 1 of 1)	lncRNA-intron (ENSMUST00000214824.1, intron 1 of 3)	-9177	ENSMUST00000185159.1	ENSMUSG00000098642	ENSMUST00000185159			Gm27977			rRNA
e11ve16_cond1_1599	chr10	45076885	45077471	+	4.68377	NA	intron (ENSMUST00000099858.3, intron 2 of 14)	protein_coding-intron (ENSMUST00000099858.3, intron 2 of 14)	9975	ENSMUST00000099858.3	ENSMUSG00000019849	ENSMUST00000099858			Prep			protein_coding
e11ve16_cond1_1600	chr10	45077616	45077848	+	3.61586	NA	intron (ENSMUST00000099858.3, intron 2 of 14)	protein_coding-intron (ENSMUST00000099858.3, intron 2 of 14)	10529	ENSMUST00000099858.3	ENSMUSG00000019849	ENSMUST00000099858			Prep			protein_coding
e11ve16_cond1_1601	chr10	45288805	45289131	+	3.72137	NA	promoter-TSS (ENSMUST00000019994.13)	protein_coding-promoter-TSS (ENSMUST00000019994.13)	-337	ENSMUST00000019994.13	ENSMUSG00000019848	ENSMUST00000175658			Popdc3			protein_coding
e11ve16_cond1_1602	chr10	45334934	45335241	+	3.33666	NA	promoter-TSS (ENSMUST00000095715.4)	protein_coding-promoter-TSS (ENSMUST00000095715.4)	-685	ENSMUST00000095715.4	ENSMUSG00000071317	ENSMUST00000095715			Bves			protein_coding
e11ve16_cond1_1603	chr10	45336025	45336232	+	3.40144	NA	intron (ENSMUST00000095715.4, intron 1 of 7)	protein_coding-intron (ENSMUST00000095715.4, intron 1 of 7)	356	ENSMUST00000095715.4	ENSMUSG00000071317	ENSMUST00000095715			Bves			protein_coding
e11ve16_cond1_1604	chr10	45458412	45458859	+	7.58277	NA	exon (ENSMUST00000214555.1, exon 4 of 4)	protein_coding-exon (ENSMUST00000214555.1, exon 4 of 4)	11566	ENSMUST00000079390.6	ENSMUSG00000063804	ENSMUST00000079390			Lin28b			protein_coding
e11ve16_cond1_1605	chr10	45468739	45470876	+	25.0825	NA	intron (ENSMUST00000215708.1, intron 1 of 3)	protein_coding-intron (ENSMUST00000079390.6, intron 1 of 4)	394	ENSMUST00000079390.6	ENSMUSG00000063804	ENSMUST00000079390			Lin28b			protein_coding
e11ve16_cond1_1606	chr10	45485631	45486066	+	4.70511	NA	promoter-TSS (ENSMUST00000214555.1)	protein_coding-promoter-TSS (ENSMUST00000214555.1)	-71	ENSMUST00000214555.1	ENSMUSG00000063804	ENSMUST00000079390			Lin28b			protein_coding
e11ve16_cond1_1607	chr10	45486455	45486736	+	3.76831	NA	promoter-TSS (ENSMUST00000214555.1)	protein_coding-promoter-TSS (ENSMUST00000214555.1)	-200	ENSMUST00000215708.1	ENSMUSG00000063804	ENSMUST00000079390			Lin28b			protein_coding
e11ve16_cond1_1608	chr10	45807209	45807597	+	4.08543	NA	promoter-TSS (ENSMUST00000213245.1)	lncRNA-promoter-TSS (ENSMUST00000213245.1)	-159	ENSMUST00000213571.1	ENSMUSG00000110874	ENSMUST00000214947			D030045P18Rik			lncRNA
e11ve16_cond1_1609	chr10	46321411	46322306	+	6.49291	NA	intron (ENSMUST00000217441.1, intron 3 of 3)	lncRNA-intron (ENSMUST00000217441.1, intron 3 of 3)	21041	ENSMUST00000217441.1	ENSMUSG00000111182	ENSMUST00000217441			Gm35430			lncRNA
e11ve16_cond1_1610	chr10	46373987	46374261	+	4.31316	NA	Intergenic	Intergenic	-3485	ENSMUST00000180247.1	ENSMUSG00000094681	ENSMUST00000180247			Gm25740			snRNA
e11ve16_cond1_1611	chr10	49782701	49783551	+	11.3739	NA	intron (ENSMUST00000220263.1, intron 2 of 7)	protein_coding-intron (ENSMUST00000079751.8, intron 1 of 15)	133	ENSMUST00000079751.8	ENSMUSG00000056073	ENSMUST00000220330			Grik2			protein_coding
e11ve16_cond1_1612	chr10	49788302	49789942	+	10.6688	NA	promoter-TSS (ENSMUST00000218823.1)	protein_coding-promoter-TSS (ENSMUST00000218823.1)	295	ENSMUST00000218448.1	ENSMUSG00000111934	ENSMUST00000218448			Gm48123			TEC
e11ve16_cond1_1613	chr10	50198301	50199645	+	5.25455	NA	Intergenic	Intergenic	-14824	ENSMUST00000218126.1	ENSMUSG00000112049	ENSMUST00000218126			Gm48269			processed_pseudogene
e11ve16_cond1_1614	chr10	50584305	50584895	+	10.1235	NA	Intergenic	Intergenic	-8069	ENSMUST00000035606.9	ENSMUSG00000038774	ENSMUST00000220355			Ascc3			protein_coding
e11ve16_cond1_1615	chr10	50892114	50893378	+	6.71173	NA	Intergenic	Intergenic	-2008	ENSMUST00000219436.1	ENSMUSG00000019913	ENSMUST00000020071			Sim1			protein_coding
e11ve16_cond1_1616	chr10	50893936	50894351	+	6.34688	NA	promoter-TSS (ENSMUST00000219436.1)	protein_coding-promoter-TSS (ENSMUST00000219436.1)	-611	ENSMUST00000219436.1	ENSMUSG00000019913	ENSMUST00000020071			Sim1			protein_coding
e11ve16_cond1_1617	chr10	50901146	50901377	+	5.001	NA	intron (ENSMUST00000020071.3, intron 1 of 10)	protein_coding-intron (ENSMUST00000020071.3, intron 1 of 10)	5610	ENSMUST00000020071.3	ENSMUSG00000019913	ENSMUST00000020071			Sim1			protein_coding
e11ve16_cond1_1618	chr10	50902386	50903556	+	19.4205	NA	intron (ENSMUST00000020071.3, intron 1 of 10)	protein_coding-intron (ENSMUST00000020071.3, intron 1 of 10)	7320	ENSMUST00000020071.3	ENSMUSG00000019913	ENSMUST00000020071			Sim1			protein_coding
e11ve16_cond1_1619	chr10	50909986	50911258	+	8.61217	NA	exon (ENSMUST00000020071.3, exon 8 of 11)	protein_coding-exon (ENSMUST00000020071.3, exon 8 of 11)	14971	ENSMUST00000020071.3	ENSMUSG00000019913	ENSMUST00000020071			Sim1			protein_coding
e11ve16_cond1_1620	chr10	51011041	51011650	+	3.60207	NA	Intergenic	Intergenic	115694	ENSMUST00000020071.3	ENSMUSG00000019913	ENSMUST00000020071			Sim1			protein_coding
e11ve16_cond1_1621	chr10	51291325	51292006	+	14.6364	NA	Intergenic	Intergenic	52836	ENSMUST00000218609.1	ENSMUSG00000111880	ENSMUST00000218609			Gm5040			processed_pseudogene
e11ve16_cond1_1622	chr10	51613539	51613987	+	5.4969	NA	Intergenic	Intergenic	17668	ENSMUST00000219286.1	ENSMUSG00000019905	ENSMUST00000219286			Gprc6a			protein_coding
e11ve16_cond1_1623	chr10	51619280	51619665	+	4.30426	NA	intron (ENSMUST00000219286.1, intron 3 of 4)	protein_coding-intron (ENSMUST00000020062.3, intron 4 of 5)	11959	ENSMUST00000219286.1	ENSMUSG00000019905	ENSMUST00000219286			Gprc6a			protein_coding
e11ve16_cond1_1624	chr10	51676988	51677517	+	5.21466	NA	promoter-TSS (ENSMUST00000122922.9)	protein_coding-promoter-TSS (ENSMUST00000122922.9)	-504	ENSMUST00000122922.9	ENSMUSG00000019900	ENSMUST00000122922			Rfx6			protein_coding
e11ve16_cond1_1625	chr10	51768806	51769251	+	3.66825	NA	Intergenic	Intergenic	11771	ENSMUST00000220412.1	ENSMUSG00000112270	ENSMUST00000220412			Gm47613			lncRNA
e11ve16_cond1_1626	chr10	51960959	51961877	+	9.27093	NA	intron (ENSMUST00000218243.1, intron 1 of 2)	lncRNA-intron (ENSMUST00000218243.1, intron 1 of 2)	8847	ENSMUST00000218243.1	ENSMUSG00000112659	ENSMUST00000218243			Gm40646			lncRNA
e11ve16_cond1_1627	chr10	52021869	52023280	+	5.23011	NA	promoter-TSS (ENSMUST00000058347.5)	protein_coding-promoter-TSS (ENSMUST00000058347.5)	72	ENSMUST00000163017.9	ENSMUSG00000049641	ENSMUST00000058347			Vgll2			protein_coding
e11ve16_cond1_1628	chr10	52174962	52176121	+	7.02661	NA	intron (ENSMUST00000219692.1, intron 3 of 40)	protein_coding-intron (ENSMUST00000020045.9, intron 4 of 43)	-13707	ENSMUST00000177313.1	ENSMUSG00000093427	ENSMUST00000177313			Gm18513			processed_pseudogene
e11ve16_cond1_1629	chr10	52298532	52298783	+	6.96724	NA	intron (ENSMUST00000069004.13, intron 5 of 10)	protein_coding-intron (ENSMUST00000069004.13, intron 5 of 10)	45000	ENSMUST00000218299.1	ENSMUSG00000112550	ENSMUST00000218299			Gm6627			processed_pseudogene
e11ve16_cond1_1630	chr10	52742566	52743107	+	7.49523	NA	intron (ENSMUST00000105473.2, intron 1 of 7)	protein_coding-intron (ENSMUST00000105473.2, intron 1 of 7)	48998	ENSMUST00000220050.1	ENSMUSG00000111918	ENSMUST00000220050			Gm47624			TEC
e11ve16_cond1_1631	chr10	52871277	52871494	+	3.86948	NA	intron (ENSMUST00000105473.2, intron 1 of 7)	protein_coding-intron (ENSMUST00000105473.2, intron 1 of 7)	-34253	ENSMUST00000157697.1	ENSMUSG00000088322	ENSMUST00000157697			Gm25664			snRNA
e11ve16_cond1_1632	chr10	53337288	53337790	+	5.19524	NA	promoter-TSS (ENSMUST00000046221.7)	protein_coding-promoter-TSS (ENSMUST00000046221.7)	-128	ENSMUST00000219491.1	ENSMUSG00000038583	ENSMUST00000046221			Pln			protein_coding
e11ve16_cond1_1633	chr10	56415995	56416212	+	3.17704	NA	Intergenic	Intergenic	-15878	ENSMUST00000218830.1	ENSMUSG00000112833	ENSMUST00000218830			Gm36595			lncRNA
e11ve16_cond1_1634	chr10	56416888	56417249	+	3.90344	NA	Intergenic	Intergenic	-14913	ENSMUST00000218830.1	ENSMUSG00000112833	ENSMUST00000218830			Gm36595			lncRNA
e11ve16_cond1_1635	chr10	56440182	56440665	+	7.23702	NA	intron (ENSMUST00000218830.1, intron 3 of 5)	lncRNA-intron (ENSMUST00000218830.1, intron 3 of 5)	-2820	ENSMUST00000220158.1	ENSMUSG00000112175	ENSMUST00000220158			4930452L12Rik			lncRNA
e11ve16_cond1_1636	chr10	56739115	56739481	+	5.04166	NA	Intergenic	Intergenic	83104	ENSMUST00000062156.7	ENSMUSG00000045048	ENSMUST00000062156			Gm9795			processed_pseudogene
e11ve16_cond1_1637	chr10	57487014	57487412	+	5.73996	NA	promoter-TSS (ENSMUST00000180831.2)	lncRNA-promoter-TSS (ENSMUST00000180831.2)	788	ENSMUST00000220042.1	ENSMUSG00000019878	ENSMUST00000218251			Hsf2			protein_coding
e11ve16_cond1_1638	chr10	57632157	57633041	+	6.19065	NA	intron (ENSMUST00000177299.7, intron 1 of 3)	protein_coding-intron (ENSMUST00000075992.11, intron 1 of 4)	475	ENSMUST00000177438.7	ENSMUSG00000019876	ENSMUST00000066028			Pkib			protein_coding
e11ve16_cond1_1639	chr10	57668717	57668930	+	4.20198	NA	intron (ENSMUST00000175852.1, intron 2 of 4)	protein_coding-intron (ENSMUST00000066028.12, intron 2 of 4)	17829	ENSMUST00000175852.1	ENSMUSG00000019876	ENSMUST00000066028			Pkib			protein_coding
e11ve16_cond1_1640	chr10	57822356	57822615	+	8.66415	NA	Intergenic	Intergenic	27917	ENSMUST00000125076.1	ENSMUSG00000019872	ENSMUST00000020022			Smpdl3a			protein_coding
e11ve16_cond1_1641	chr10	58627346	58627745	+	3.54322	NA	intron (ENSMUST00000003312.4, intron 4 of 11)	protein_coding-intron (ENSMUST00000003312.4, intron 4 of 11)	48109	ENSMUST00000003312.4	ENSMUSG00000003227	ENSMUST00000003312			Edar			protein_coding
e11ve16_cond1_1642	chr10	58641701	58641995	+	3.74415	NA	intron (ENSMUST00000003312.4, intron 1 of 11)	protein_coding-intron (ENSMUST00000003312.4, intron 1 of 11)	33806	ENSMUST00000003312.4	ENSMUSG00000003227	ENSMUST00000003312			Edar			protein_coding
e11ve16_cond1_1643	chr10	58812271	58812472	+	3.20239	NA	promoter-TSS (ENSMUST00000135526.8)	protein_coding-promoter-TSS (ENSMUST00000135526.8)	771	ENSMUST00000069768.3	ENSMUSG00000055958	ENSMUST00000069768			Gm9987			pseudogene
e11ve16_cond1_1644	chr10	58854629	58854831	+	4.90165	NA	intron (ENSMUST00000135526.8, intron 1 of 3)	protein_coding-intron (ENSMUST00000133151.1, intron 1 of 2)	40671	ENSMUST00000133151.1	ENSMUSG00000037990	ENSMUST00000152924			Sh3rf3			protein_coding
e11ve16_cond1_1645	chr10	59323936	59324161	+	3.94242	NA	intron (ENSMUST00000105466.2, intron 1 of 14)	protein_coding-intron (ENSMUST00000009789.14, intron 1 of 14)	680	ENSMUST00000105466.2	ENSMUSG00000019916	ENSMUST00000092512			P4ha1			protein_coding
e11ve16_cond1_1646	chr10	59539036	59539591	+	4.69004	NA	intron (ENSMUST00000161435.1, intron 3 of 3)	protein_coding-intron (ENSMUST00000020312.12, intron 1 of 7)	-76750	ENSMUST00000095646.1	ENSMUSG00000071280	ENSMUST00000095646			Gm10322			lncRNA
e11ve16_cond1_1647	chr10	59741748	59742118	+	3.67982	NA	exon (ENSMUST00000167872.7, exon 4 of 4)	protein_coding-exon (ENSMUST00000167872.7, exon 4 of 4)	1159	ENSMUST00000167612.1	ENSMUSG00000020111	ENSMUST00000165405			Micu1			protein_coding
e11ve16_cond1_1648	chr10	59880196	59880408	+	4.49427	NA	intron (ENSMUST00000020309.6, intron 1 of 8)	protein_coding-intron (ENSMUST00000020309.6, intron 1 of 8)	676	ENSMUST00000020309.6	ENSMUSG00000020109	ENSMUST00000131810			Dnajb12			protein_coding
e11ve16_cond1_1649	chr10	59911290	59911722	+	3.65206	NA	Intergenic	Intergenic	31880	ENSMUST00000020309.6	ENSMUSG00000020109	ENSMUST00000131810			Dnajb12			protein_coding
e11ve16_cond1_1650	chr10	59963979	59965666	+	10.5485	NA	Intergenic	Intergenic	-12988	ENSMUST00000020308.4	ENSMUSG00000020108	ENSMUST00000020308			Ddit4			protein_coding
e11ve16_cond1_1651	chr10	60032236	60032848	+	5.03887	NA	intron (ENSMUST00000164083.3, intron 5 of 10)	protein_coding-intron (ENSMUST00000050516.13, intron 5 of 10)	29215	ENSMUST00000164083.3	ENSMUSG00000044475	ENSMUST00000219778			Ascc1			protein_coding
e11ve16_cond1_1652	chr10	60042518	60042889	+	3.60962	NA	intron (ENSMUST00000164083.3, intron 6 of 10)	protein_coding-intron (ENSMUST00000050516.13, intron 6 of 10)	39376	ENSMUST00000164083.3	ENSMUSG00000044475	ENSMUST00000219778			Ascc1			protein_coding
e11ve16_cond1_1653	chr10	60105863	60106556	+	4.43028	NA	promoter-TSS (ENSMUST00000121820.8)	protein_coding-promoter-TSS (ENSMUST00000121820.8)	-10	ENSMUST00000138976.2	ENSMUSG00000058297	ENSMUST00000138976			Spock2			protein_coding
e11ve16_cond1_1654	chr10	60106691	60107638	+	5.7449	NA	intron (ENSMUST00000121820.8, intron 1 of 10)	protein_coding-intron (ENSMUST00000121820.8, intron 1 of 10)	696	ENSMUST00000165024.2	ENSMUSG00000058297	ENSMUST00000138976			Spock2			protein_coding
e11ve16_cond1_1655	chr10	60115610	60116367	+	8.33637	NA	intron (ENSMUST00000165024.2, intron 2 of 10)	protein_coding-intron (ENSMUST00000121820.8, intron 1 of 10)	9520	ENSMUST00000165024.2	ENSMUSG00000058297	ENSMUST00000138976			Spock2			protein_coding
e11ve16_cond1_1656	chr10	60148431	60148635	+	3.53139	NA	Intergenic	Intergenic	21757	ENSMUST00000198998.1	ENSMUSG00000105468	ENSMUST00000198998			Mir6906			miRNA
e11ve16_cond1_1657	chr10	60148882	60149211	+	5.03711	NA	Intergenic	Intergenic	22270	ENSMUST00000198998.1	ENSMUSG00000105468	ENSMUST00000198998			Mir6906			miRNA
e11ve16_cond1_1658	chr10	60194218	60194474	+	4.65142	NA	promoter-TSS (ENSMUST00000167915.1)	protein_coding-promoter-TSS (ENSMUST00000167915.1)	-107	ENSMUST00000167915.1	ENSMUSG00000057337	ENSMUST00000167915			Chst3			protein_coding
e11ve16_cond1_1659	chr10	60219122	60219432	+	4.50962	NA	promoter-TSS (ENSMUST00000135158.8)	protein_coding-promoter-TSS (ENSMUST00000135158.8)	-17	ENSMUST00000135158.8	ENSMUSG00000057337	ENSMUST00000167915			Chst3			protein_coding
e11ve16_cond1_1660	chr10	60271651	60271855	+	13.4407	NA	Intergenic	Intergenic	-5874	ENSMUST00000105465.7	ENSMUSG00000004207	ENSMUST00000004316			Psap			protein_coding
e11ve16_cond1_1661	chr10	60285444	60285644	+	3.38854	NA	intron (ENSMUST00000165878.1, intron 1 of 13)	protein_coding-intron (ENSMUST00000004316.14, intron 1 of 13)	1083	ENSMUST00000165878.1	ENSMUSG00000004207	ENSMUST00000004316			Psap			protein_coding
e11ve16_cond1_1662	chr10	60285928	60286174	+	4.65067	NA	intron (ENSMUST00000165878.1, intron 1 of 13)	protein_coding-intron (ENSMUST00000004316.14, intron 1 of 13)	1590	ENSMUST00000165878.1	ENSMUSG00000004207	ENSMUST00000004316			Psap			protein_coding
e11ve16_cond1_1663	chr10	60355269	60355484	+	7.91982	NA	intron (ENSMUST00000105459.1, intron 1 of 6)	protein_coding-intron (ENSMUST00000020301.13, intron 1 of 6)	6053	ENSMUST00000105459.1	ENSMUSG00000020101	ENSMUST00000020301			Vsir			protein_coding
e11ve16_cond1_1664	chr10	60399154	60400566	+	7.84782	NA	promoter-TSS (ENSMUST00000218360.1)	protein_coding-promoter-TSS (ENSMUST00000218360.1)	-44	ENSMUST00000218974.1	ENSMUSG00000090439	ENSMUST00000218974			Gm17455			protein_coding
e11ve16_cond1_1665	chr10	60803959	60804311	+	6.08114	NA	intron (ENSMUST00000218637.1, intron 1 of 15)	protein_coding-intron (ENSMUST00000077925.6, intron 1 of 16)	10188	ENSMUST00000218180.1	ENSMUSG00000112592	ENSMUST00000218180			Gm19972			TEC
e11ve16_cond1_1666	chr10	60811683	60812541	+	5.65301	NA	exon (ENSMUST00000218180.1, exon 1 of 1)	TEC-exon (ENSMUST00000218180.1, exon 1 of 1)	2211	ENSMUST00000218180.1	ENSMUSG00000112592	ENSMUST00000218180			Gm19972			TEC
e11ve16_cond1_1667	chr10	60814261	60814566	+	6.77616	NA	promoter-TSS (ENSMUST00000218180.1)	TEC-promoter-TSS (ENSMUST00000218180.1)	-90	ENSMUST00000218180.1	ENSMUSG00000112592	ENSMUST00000218180			Gm19972			TEC
e11ve16_cond1_1668	chr10	60826535	60827147	+	5.87644	NA	intron (ENSMUST00000218637.1, intron 1 of 15)	protein_coding-intron (ENSMUST00000077925.6, intron 1 of 16)	4541	ENSMUST00000218637.1	ENSMUSG00000020099	ENSMUST00000218316			Unc5b			protein_coding
e11ve16_cond1_1669	chr10	60886014	60886268	+	4.41221	NA	Intergenic	Intergenic	-36882	ENSMUST00000183643.1	ENSMUSG00000099279	ENSMUST00000183643			Mir6408			miRNA
e11ve16_cond1_1670	chr10	60904230	60905138	+	6.07504	NA	Intergenic	Intergenic	-18339	ENSMUST00000183643.1	ENSMUSG00000099279	ENSMUST00000183643			Mir6408			miRNA
e11ve16_cond1_1671	chr10	61068325	61069168	+	5.80079	NA	Intergenic	Intergenic	-16846	ENSMUST00000176406.1	ENSMUSG00000093573	ENSMUST00000176406			Gm20610			lncRNA
e11ve16_cond1_1672	chr10	61077892	61079056	+	10.8177	NA	Intergenic	Intergenic	-10857	ENSMUST00000218005.1	ENSMUSG00000020098	ENSMUST00000218005			Pcbd1			protein_coding
e11ve16_cond1_1673	chr10	61146467	61147323	+	6.52977	NA	promoter-TSS (ENSMUST00000126307.1)	protein_coding-promoter-TSS (ENSMUST00000126307.1)	3	ENSMUST00000126307.1	ENSMUSG00000020097	ENSMUST00000150258			Sgpl1			protein_coding
e11ve16_cond1_1674	chr10	61424355	61424775	+	4.01248	NA	exon (ENSMUST00000049339.6, exon 3 of 3)	protein_coding-exon (ENSMUST00000049339.6, exon 3 of 3)	6593	ENSMUST00000049339.6	ENSMUSG00000037171	ENSMUST00000049339			Nodal			protein_coding
e11ve16_cond1_1675	chr10	61475378	61475695	+	5.17016	NA	promoter-TSS (ENSMUST00000049242.8)	protein_coding-promoter-TSS (ENSMUST00000049242.8)	-265	ENSMUST00000049242.8	ENSMUSG00000037151	ENSMUST00000049242			Lrrc20			protein_coding
e11ve16_cond1_1676	chr10	61476092	61476645	+	6.84034	NA	exon (ENSMUST00000051330.4, exon 1 of 1)	lncRNA-exon (ENSMUST00000051330.4, exon 1 of 1)	567	ENSMUST00000049242.8	ENSMUSG00000037151	ENSMUST00000049242			Lrrc20			protein_coding
e11ve16_cond1_1677	chr10	61491699	61492306	+	7.22023	NA	intron (ENSMUST00000049242.8, intron 2 of 4)	protein_coding-intron (ENSMUST00000049242.8, intron 2 of 4)	4288	ENSMUST00000220313.1	ENSMUSG00000112080	ENSMUST00000220313			Gm47595			lncRNA
e11ve16_cond1_1678	chr10	61694986	61695188	+	3.28777	NA	promoter-TSS (ENSMUST00000020284.4)	protein_coding-promoter-TSS (ENSMUST00000020284.4)	-427	ENSMUST00000020284.4	ENSMUSG00000020087	ENSMUST00000218135			Tysnd1			protein_coding
e11ve16_cond1_1679	chr10	61696001	61696393	+	4.73642	NA	promoter-TSS (ENSMUST00000218135.1)	protein_coding-promoter-TSS (ENSMUST00000218135.1)	-196	ENSMUST00000218135.1	ENSMUSG00000020087	ENSMUST00000218135			Tysnd1			protein_coding
e11ve16_cond1_1680	chr10	61782022	61782829	+	9.57666	NA	intron (ENSMUST00000020283.4, intron 1 of 8)	protein_coding-intron (ENSMUST00000020283.4, intron 1 of 8)	1722	ENSMUST00000020283.4	ENSMUSG00000020086	ENSMUST00000020283			Macroh2a2			protein_coding
e11ve16_cond1_1681	chr10	61783395	61783798	+	5.45364	NA	intron (ENSMUST00000020283.4, intron 1 of 8)	protein_coding-intron (ENSMUST00000020283.4, intron 1 of 8)	551	ENSMUST00000020283.4	ENSMUSG00000020086	ENSMUST00000020283			Macroh2a2			protein_coding
e11ve16_cond1_1682	chr10	61783915	61784564	+	11.4438	NA	promoter-TSS (ENSMUST00000020283.4)	protein_coding-promoter-TSS (ENSMUST00000020283.4)	-92	ENSMUST00000020283.4	ENSMUSG00000020086	ENSMUST00000020283			Macroh2a2			protein_coding
e11ve16_cond1_1683	chr10	61928934	61929188	+	4.47796	NA	intron (ENSMUST00000105452.8, intron 2 of 39)	protein_coding-intron (ENSMUST00000051826.13, intron 2 of 33)	-30563	ENSMUST00000218711.1	ENSMUSG00000112574	ENSMUST00000218711			Gm5750			processed_pseudogene
e11ve16_cond1_1684	chr10	61936395	61937176	+	3.8341	NA	intron (ENSMUST00000105452.8, intron 2 of 39)	protein_coding-intron (ENSMUST00000051826.13, intron 2 of 33)	-22839	ENSMUST00000218711.1	ENSMUSG00000112574	ENSMUST00000218711			Gm5750			processed_pseudogene
e11ve16_cond1_1685	chr10	61978450	61979693	+	6.28738	NA	promoter-TSS (ENSMUST00000051826.13)	protein_coding-promoter-TSS (ENSMUST00000051826.13)	2	ENSMUST00000105452.8	ENSMUSG00000058806	ENSMUST00000105453			Col13a1			protein_coding
e11ve16_cond1_1686	chr10	61979998	61980377	+	5.69894	NA	Intergenic	Intergenic	-1079	ENSMUST00000105454.2	ENSMUSG00000058806	ENSMUST00000105453			Col13a1			protein_coding
e11ve16_cond1_1687	chr10	62101755	62102236	+	6.59109	NA	Intergenic	Intergenic	8501	ENSMUST00000141144.1	ENSMUSG00000020083	ENSMUST00000142796			Fam241b			protein_coding
e11ve16_cond1_1688	chr10	62420546	62421122	+	6.53306	NA	intron (ENSMUST00000020277.8, intron 1 of 17)	protein_coding-intron (ENSMUST00000020277.8, intron 1 of 17)	1574	ENSMUST00000159579.1	ENSMUSG00000020080	ENSMUST00000159454			Hkdc1			protein_coding
e11ve16_cond1_1689	chr10	62449129	62449355	+	5.22647	NA	promoter-TSS (ENSMUST00000181110.1)	lncRNA-promoter-TSS (ENSMUST00000181110.1)	-247	ENSMUST00000181110.1	ENSMUSG00000097129	ENSMUST00000238598			4930507D05Rik			lncRNA
e11ve16_cond1_1690	chr10	62508217	62508744	+	5.66836	NA	promoter-TSS (ENSMUST00000020271.12)	protein_coding-promoter-TSS (ENSMUST00000020271.12)	-383	ENSMUST00000159020.1	ENSMUSG00000020077	ENSMUST00000160643			Srgn			protein_coding
e11ve16_cond1_1691	chr10	62522303	62523026	+	13.9111	NA	intron (ENSMUST00000162956.1, intron 1 of 3)	protein_coding-intron (ENSMUST00000160643.7, intron 1 of 3)	4761	ENSMUST00000160643.7	ENSMUSG00000020077	ENSMUST00000160643			Srgn			protein_coding
e11ve16_cond1_1692	chr10	62578616	62579161	+	6.03919	NA	promoter-TSS (ENSMUST00000065887.13)	protein_coding-promoter-TSS (ENSMUST00000065887.13)	-431	ENSMUST00000065887.13	ENSMUSG00000036955	ENSMUST00000162263			Kif1bp			protein_coding
e11ve16_cond1_1693	chr10	62686712	62687645	+	6.83856	NA	intron (ENSMUST00000133371.7, intron 1 of 3)	protein_coding-intron (ENSMUST00000126979.1, intron 2 of 3)	4670	ENSMUST00000200383.1	ENSMUSG00000105329	ENSMUST00000200383			Mir7215			miRNA
e11ve16_cond1_1694	chr10	62721894	62722153	+	15.1204	NA	intron (ENSMUST00000133371.7, intron 1 of 3)	protein_coding-intron (ENSMUST00000126979.1, intron 2 of 3)	3778	ENSMUST00000148720.7	ENSMUSG00000036923	ENSMUST00000126979			Stox1			protein_coding
e11ve16_cond1_1695	chr10	62725700	62725915	+	3.73944	NA	promoter-TSS (ENSMUST00000126979.1)	protein_coding-promoter-TSS (ENSMUST00000126979.1)	-6	ENSMUST00000126979.1	ENSMUSG00000036923	ENSMUST00000126979			Stox1			protein_coding
e11ve16_cond1_1696	chr10	62726207	62726593	+	4.28585	NA	promoter-TSS (ENSMUST00000126979.1)	protein_coding-promoter-TSS (ENSMUST00000126979.1)	-272	ENSMUST00000133371.7	ENSMUSG00000036923	ENSMUST00000126979			Stox1			protein_coding
e11ve16_cond1_1697	chr10	62792553	62792949	+	3.82045	NA	promoter-TSS (ENSMUST00000020268.6)	protein_coding-promoter-TSS (ENSMUST00000020268.6)	-465	ENSMUST00000219527.1	ENSMUSG00000020074	ENSMUST00000218229			Ccar1			protein_coding
e11ve16_cond1_1698	chr10	62865640	62866522	+	6.79968	NA	promoter-TSS (ENSMUST00000173081.1)	protein_coding-promoter-TSS (ENSMUST00000173081.1)	-777	ENSMUST00000173081.1	ENSMUSG00000047146	ENSMUST00000050826			Tet1			protein_coding
e11ve16_cond1_1699	chr10	62980131	62980466	+	3.60621	NA	promoter-TSS (ENSMUST00000062600.7)	protein_coding-promoter-TSS (ENSMUST00000062600.7)	5	ENSMUST00000062600.7	ENSMUSG00000020070	ENSMUST00000143726			Rufy2			protein_coding
e11ve16_cond1_1700	chr10	63090003	63090215	+	3.80847	NA	Intergenic	Intergenic	-8240	ENSMUST00000193990.1	ENSMUSG00000104481	ENSMUST00000193990			Gm38063			TEC
e11ve16_cond1_1701	chr10	63099630	63100802	+	7.27995	NA	promoter-TSS (ENSMUST00000219964.1)	protein_coding-promoter-TSS (ENSMUST00000219964.1)	-148	ENSMUST00000219964.1	ENSMUSG00000036816	ENSMUST00000044059			Atoh7			protein_coding
e11ve16_cond1_1702	chr10	63186566	63187002	+	10.1784	NA	intron (ENSMUST00000095580.2, intron 2 of 19)	protein_coding-intron (ENSMUST00000095580.2, intron 2 of 19)	17168	ENSMUST00000095580.2	ENSMUSG00000020067	ENSMUST00000095580			Mypn			protein_coding
e11ve16_cond1_1703	chr10	63338379	63338966	+	5.73624	NA	exon (ENSMUST00000020257.12, exon 1 of 9)	protein_coding-exon (ENSMUST00000020257.12, exon 1 of 9)	360	ENSMUST00000020257.12	ENSMUSG00000020063	ENSMUST00000120239			Sirt1			protein_coding
e11ve16_cond1_1704	chr10	63366265	63366471	+	4.73871	NA	intron (ENSMUST00000120239.7, intron 2 of 13)	protein_coding-intron (ENSMUST00000120239.7, intron 2 of 13)	12515	ENSMUST00000128807.1	ENSMUSG00000085372	ENSMUST00000128807			Gm16145			lncRNA
e11ve16_cond1_1705	chr10	63410407	63410820	+	4.4701	NA	TTS (ENSMUST00000043317.6)	protein_coding-TTS (ENSMUST00000043317.6)	-2386	ENSMUST00000218466.1	ENSMUSG00000112572	ENSMUST00000218466			Gm7530			processed_pseudogene
e11ve16_cond1_1706	chr10	63893368	63893668	+	3.98117	NA	intron (ENSMUST00000075099.4, intron 6 of 16)	protein_coding-intron (ENSMUST00000075099.4, intron 6 of 16)	33916	ENSMUST00000079279.3	ENSMUSG00000062561	ENSMUST00000079279			Gm10118			TEC
e11ve16_cond1_1707	chr10	64006738	64007343	+	6.40496	NA	intron (ENSMUST00000131945.1, intron 1 of 1)	protein_coding-intron (ENSMUST00000075099.4, intron 6 of 16)	-79606	ENSMUST00000079279.3	ENSMUSG00000062561	ENSMUST00000079279			Gm10118			TEC
e11ve16_cond1_1708	chr10	66606882	66607199	+	3.64275	NA	Intergenic	Intergenic	-33878	ENSMUST00000189480.1	ENSMUSG00000101338	ENSMUST00000189480			Gm28139			lncRNA
e11ve16_cond1_1709	chr10	67002567	67002841	+	3.44556	NA	Intergenic	Intergenic	-2316	ENSMUST00000217788.1	ENSMUSG00000112925	ENSMUST00000219739			Gm31763			lncRNA
e11ve16_cond1_1710	chr10	67003255	67003468	+	3.39165	NA	Intergenic	Intergenic	-1659	ENSMUST00000217788.1	ENSMUSG00000112925	ENSMUST00000219739			Gm31763			lncRNA
e11ve16_cond1_1711	chr10	67097494	67097914	+	6.47914	NA	promoter-TSS (ENSMUST00000020023.8)	protein_coding-promoter-TSS (ENSMUST00000020023.8)	-759	ENSMUST00000020023.8	ENSMUSG00000019873	ENSMUST00000020023			Reep3			protein_coding
e11ve16_cond1_1712	chr10	67126410	67126950	+	4.00103	NA	promoter-TSS (ENSMUST00000051446.15)	protein_coding-promoter-TSS (ENSMUST00000051446.15)	-578	ENSMUST00000051446.15	ENSMUSG00000037876	ENSMUST00000173762			Jmjd1c			protein_coding
e11ve16_cond1_1713	chr10	67186308	67186533	+	3.44852	NA	exon (ENSMUST00000219563.1, exon 1 of 1)	protein_coding-exon (ENSMUST00000219563.1, exon 1 of 1)	667	ENSMUST00000173949.1	ENSMUSG00000037876	ENSMUST00000173762			Jmjd1c			protein_coding
e11ve16_cond1_1714	chr10	67186660	67186911	+	3.70379	NA	exon (ENSMUST00000219563.1, exon 1 of 1)	protein_coding-exon (ENSMUST00000219563.1, exon 1 of 1)	1032	ENSMUST00000173949.1	ENSMUSG00000037876	ENSMUST00000173762			Jmjd1c			protein_coding
e11ve16_cond1_1715	chr10	67229611	67229952	+	5.06256	NA	intron (ENSMUST00000173689.7, intron 9 of 24)	protein_coding-intron (ENSMUST00000051446.15, intron 10 of 25)	6180	ENSMUST00000158873.1	ENSMUSG00000089498	ENSMUST00000158873			Gm26359			snRNA
e11ve16_cond1_1716	chr10	67317795	67318053	+	5.56059	NA	intron (ENSMUST00000220398.1, intron 1 of 4)	lncRNA-intron (ENSMUST00000220398.1, intron 1 of 4)	20518	ENSMUST00000220398.1	ENSMUSG00000112314	ENSMUST00000220398			Gm49454			lncRNA
e11ve16_cond1_1717	chr10	67318512	67318830	+	5.13993	NA	intron (ENSMUST00000220398.1, intron 1 of 4)	lncRNA-intron (ENSMUST00000220398.1, intron 1 of 4)	21265	ENSMUST00000220398.1	ENSMUSG00000112314	ENSMUST00000220398			Gm49454			lncRNA
e11ve16_cond1_1718	chr10	67549380	67549736	+	5.98173	NA	promoter-TSS (ENSMUST00000075686.6)	protein_coding-promoter-TSS (ENSMUST00000075686.6)	-490	ENSMUST00000075686.6	ENSMUSG00000057134	ENSMUST00000075686			Ado			protein_coding
e11ve16_cond1_1719	chr10	67697996	67699049	+	4.91276	NA	Intergenic	Intergenic	-9316	ENSMUST00000219743.1	ENSMUSG00000112396	ENSMUST00000219743			Gm47574			TEC
e11ve16_cond1_1720	chr10	67911911	67912429	+	6.75332	NA	intron (ENSMUST00000138543.1, intron 1 of 2)	protein_coding-intron (ENSMUST00000064656.7, intron 1 of 4)	265	ENSMUST00000138543.1	ENSMUSG00000037855	ENSMUST00000138543			Zfp365			protein_coding
e11ve16_cond1_1721	chr10	67965889	67966305	+	3.60857	NA	intron (ENSMUST00000219339.1, intron 2 of 2)	lncRNA-intron (ENSMUST00000219339.1, intron 2 of 2)	7611	ENSMUST00000219339.1	ENSMUSG00000112899	ENSMUST00000219339			4930521O17Rik			lncRNA
e11ve16_cond1_1722	chr10	68147235	68147801	+	6.96157	NA	intron (ENSMUST00000020106.8, intron 4 of 10)	protein_coding-intron (ENSMUST00000020106.8, intron 4 of 10)	-10892	ENSMUST00000218532.1	ENSMUSG00000019947	ENSMUST00000218425			Arid5b			protein_coding
e11ve16_cond1_1723	chr10	68148107	68148325	+	4.26579	NA	intron (ENSMUST00000020106.8, intron 4 of 10)	protein_coding-intron (ENSMUST00000020106.8, intron 4 of 10)	-11590	ENSMUST00000218532.1	ENSMUSG00000019947	ENSMUST00000218425			Arid5b			protein_coding
e11ve16_cond1_1724	chr10	68231661	68232025	+	4.15724	NA	intron (ENSMUST00000020106.8, intron 3 of 10)	protein_coding-intron (ENSMUST00000020106.8, intron 3 of 10)	46878	ENSMUST00000218425.1	ENSMUSG00000019947	ENSMUST00000218425			Arid5b			protein_coding
e11ve16_cond1_1725	chr10	68248110	68248723	+	5.05901	NA	intron (ENSMUST00000219238.1, intron 2 of 9)	protein_coding-intron (ENSMUST00000020106.8, intron 2 of 10)	30305	ENSMUST00000218425.1	ENSMUSG00000019947	ENSMUST00000218425			Arid5b			protein_coding
e11ve16_cond1_1726	chr10	68276125	68276489	+	4.90926	NA	intron (ENSMUST00000219238.1, intron 2 of 9)	protein_coding-intron (ENSMUST00000020106.8, intron 2 of 10)	2414	ENSMUST00000218425.1	ENSMUSG00000019947	ENSMUST00000218425			Arid5b			protein_coding
e11ve16_cond1_1727	chr10	68277823	68278178	+	5.49884	NA	exon (ENSMUST00000020106.8, exon 2 of 11)	protein_coding-exon (ENSMUST00000020106.8, exon 2 of 11)	721	ENSMUST00000218425.1	ENSMUSG00000019947	ENSMUST00000218425			Arid5b			protein_coding
e11ve16_cond1_1728	chr10	68352094	68352420	+	8.74124	NA	Intergenic	Intergenic	-31115	ENSMUST00000218225.1	ENSMUSG00000112157	ENSMUST00000218225			4930545H06Rik			lncRNA
e11ve16_cond1_1729	chr10	68717343	68717854	+	16.7698	NA	Intergenic	Intergenic	-6048	ENSMUST00000219392.1	ENSMUSG00000060044	ENSMUST00000080995			Tmem26			protein_coding
e11ve16_cond1_1730	chr10	68724090	68724414	+	4.34579	NA	intron (ENSMUST00000080995.7, intron 1 of 5)	protein_coding-intron (ENSMUST00000080995.7, intron 1 of 5)	428	ENSMUST00000218918.1	ENSMUSG00000060044	ENSMUST00000080995			Tmem26			protein_coding
e11ve16_cond1_1731	chr10	69034095	69034779	+	5.45103	NA	promoter-TSS (ENSMUST00000219854.1)	lncRNA-promoter-TSS (ENSMUST00000219854.1)	-549	ENSMUST00000219854.1	ENSMUSG00000112331	ENSMUST00000219854			Gm33035			lncRNA
e11ve16_cond1_1732	chr10	69045582	69045937	+	3.63787	NA	Intergenic	Intergenic	-11871	ENSMUST00000219854.1	ENSMUSG00000112331	ENSMUST00000219854			Gm33035			lncRNA
e11ve16_cond1_1733	chr10	69306579	69307128	+	4.77588	NA	Intergenic	Intergenic	-5286	ENSMUST00000217861.1	ENSMUSG00000112798	ENSMUST00000217861			Gm40685			lncRNA
e11ve16_cond1_1734	chr10	69321953	69322179	+	4.36919	NA	Intergenic	Intergenic	9927	ENSMUST00000217861.1	ENSMUSG00000112798	ENSMUST00000217861			Gm40685			lncRNA
e11ve16_cond1_1735	chr10	69399986	69400352	+	3.15771	NA	promoter-TSS (ENSMUST00000217780.1)	protein_coding-promoter-TSS (ENSMUST00000217780.1)	-220	ENSMUST00000217780.1	ENSMUSG00000069601	ENSMUST00000183001			Ank3			protein_coding
e11ve16_cond1_1736	chr10	69451512	69452236	+	4.63529	NA	intron (ENSMUST00000217780.1, intron 1 of 1)	protein_coding-intron (ENSMUST00000217780.1, intron 1 of 1)	-28126	ENSMUST00000218846.1	ENSMUSG00000111899	ENSMUST00000218846			Gm18636			processed_pseudogene
e11ve16_cond1_1737	chr10	69500345	69500653	+	3.50713	NA	intron (ENSMUST00000218680.1, intron 2 of 42)	protein_coding-intron (ENSMUST00000218194.1, intron 2 of 2)	-33273	ENSMUST00000182884.7	ENSMUSG00000069601	ENSMUST00000183001			Ank3			protein_coding
e11ve16_cond1_1738	chr10	69533740	69534077	+	3.91796	NA	promoter-TSS (ENSMUST00000047061.12)	protein_coding-promoter-TSS (ENSMUST00000047061.12)	61	ENSMUST00000183169.7	ENSMUSG00000069601	ENSMUST00000183001			Ank3			protein_coding
e11ve16_cond1_1739	chr10	69570526	69571038	+	4.73151	NA	intron (ENSMUST00000182439.7, intron 1 of 17)	protein_coding-intron (ENSMUST00000047061.12, intron 1 of 16)	-4421	ENSMUST00000220152.1	ENSMUSG00000112729	ENSMUST00000220152			Gm46231			processed_pseudogene
e11ve16_cond1_1740	chr10	69572304	69572621	+	6.1222	NA	intron (ENSMUST00000182439.7, intron 1 of 17)	protein_coding-intron (ENSMUST00000047061.12, intron 1 of 16)	-6101	ENSMUST00000220152.1	ENSMUSG00000112729	ENSMUST00000220152			Gm46231			processed_pseudogene
e11ve16_cond1_1741	chr10	69574025	69574233	+	4.39648	NA	intron (ENSMUST00000182439.7, intron 1 of 17)	protein_coding-intron (ENSMUST00000047061.12, intron 1 of 16)	-7768	ENSMUST00000220152.1	ENSMUSG00000112729	ENSMUST00000220152			Gm46231			processed_pseudogene
e11ve16_cond1_1742	chr10	69648982	69649459	+	5.49431	NA	intron (ENSMUST00000182379.6, intron 2 of 2)	protein_coding-intron (ENSMUST00000047061.12, intron 1 of 16)	-57076	ENSMUST00000182142.1	ENSMUSG00000069601	ENSMUST00000183001			Ank3			protein_coding
e11ve16_cond1_1743	chr10	69662255	69662455	+	3.68781	NA	intron (ENSMUST00000182379.6, intron 2 of 2)	protein_coding-intron (ENSMUST00000047061.12, intron 1 of 16)	-43941	ENSMUST00000182142.1	ENSMUSG00000069601	ENSMUST00000183001			Ank3			protein_coding
e11ve16_cond1_1744	chr10	69706258	69707540	+	8.07805	NA	exon (ENSMUST00000182142.1, exon 1 of 1)	protein_coding-exon (ENSMUST00000182142.1, exon 1 of 1)	421	ENSMUST00000182162.7	ENSMUSG00000069601	ENSMUST00000183001			Ank3			protein_coding
e11ve16_cond1_1745	chr10	69785902	69786833	+	5.24947	NA	intron (ENSMUST00000182492.1, intron 1 of 3)	protein_coding-intron (ENSMUST00000047061.12, intron 1 of 16)	842	ENSMUST00000182993.7	ENSMUSG00000069601	ENSMUST00000183001			Ank3			protein_coding
e11ve16_cond1_1746	chr10	69786967	69787297	+	4.69478	NA	promoter-TSS (ENSMUST00000183240.1)	protein_coding-promoter-TSS (ENSMUST00000183240.1)	-324	ENSMUST00000183240.1	ENSMUSG00000069601	ENSMUST00000183001			Ank3			protein_coding
e11ve16_cond1_1747	chr10	69925811	69926464	+	5.18817	NA	promoter-TSS (ENSMUST00000182437.7)	protein_coding-promoter-TSS (ENSMUST00000182437.7)	4	ENSMUST00000182437.7	ENSMUSG00000069601	ENSMUST00000183001			Ank3			protein_coding
e11ve16_cond1_1748	chr10	70084939	70085430	+	6.14462	NA	Intergenic	Intergenic	-11937	ENSMUST00000147545.7	ENSMUSG00000048701	ENSMUST00000145990			Ccdc6			protein_coding
e11ve16_cond1_1749	chr10	70097059	70097698	+	28.8894	NA	exon (ENSMUST00000147545.7, exon 1 of 9)	protein_coding-exon (ENSMUST00000147545.7, exon 1 of 9)	257	ENSMUST00000147545.7	ENSMUSG00000048701	ENSMUST00000145990			Ccdc6			protein_coding
e11ve16_cond1_1750	chr10	70119628	70119861	+	4.32304	NA	intron (ENSMUST00000147545.7, intron 1 of 8)	protein_coding-intron (ENSMUST00000147545.7, intron 1 of 8)	22623	ENSMUST00000147545.7	ENSMUSG00000048701	ENSMUST00000145990			Ccdc6			protein_coding
e11ve16_cond1_1751	chr10	70168295	70168548	+	3.75951	NA	intron (ENSMUST00000147545.7, intron 4 of 8)	protein_coding-intron (ENSMUST00000147545.7, intron 4 of 8)	-6088	ENSMUST00000145990.1	ENSMUSG00000048701	ENSMUST00000145990			Ccdc6			protein_coding
e11ve16_cond1_1752	chr10	70173598	70173830	+	4.59686	NA	promoter-TSS (ENSMUST00000145990.1)	protein_coding-promoter-TSS (ENSMUST00000145990.1)	-795	ENSMUST00000145990.1	ENSMUSG00000048701	ENSMUST00000145990			Ccdc6			protein_coding
e11ve16_cond1_1753	chr10	70244906	70245137	+	3.78117	NA	promoter-TSS (ENSMUST00000046807.6)	protein_coding-promoter-TSS (ENSMUST00000046807.6)	-79	ENSMUST00000046807.6	ENSMUSG00000037762	ENSMUST00000155933			Slc16a9			protein_coding
e11ve16_cond1_1754	chr10	70439832	70440139	+	5.22508	NA	promoter-TSS (ENSMUST00000062883.6)	protein_coding-promoter-TSS (ENSMUST00000062883.6)	-496	ENSMUST00000218542.1	ENSMUSG00000043259	ENSMUST00000220159			Fam13c			protein_coding
e11ve16_cond1_1755	chr10	70440345	70440713	+	4.30367	NA	promoter-TSS (ENSMUST00000062883.6)	protein_coding-promoter-TSS (ENSMUST00000062883.6)	48	ENSMUST00000218542.1	ENSMUSG00000043259	ENSMUST00000220159			Fam13c			protein_coding
e11ve16_cond1_1756	chr10	70519770	70521290	+	12.4792	NA	intron (ENSMUST00000062883.6, intron 5 of 13)	protein_coding-intron (ENSMUST00000062883.6, intron 5 of 13)	-15282	ENSMUST00000219398.1	ENSMUSG00000112273	ENSMUST00000219398			Gm29783			processed_pseudogene
e11ve16_cond1_1757	chr10	70600053	70600285	+	6.31053	NA	promoter-TSS (ENSMUST00000046513.9)	protein_coding-promoter-TSS (ENSMUST00000046513.9)	-878	ENSMUST00000046513.9	ENSMUSG00000037747	ENSMUST00000159025			Phyhipl			protein_coding
e11ve16_cond1_1758	chr10	70763410	70764153	+	7.11965	NA	Intergenic	Intergenic	-24937	ENSMUST00000219486.1	ENSMUSG00000112607	ENSMUST00000219486			Gm33979			lncRNA
e11ve16_cond1_1759	chr10	70932396	70932626	+	5.64266	NA	intron (ENSMUST00000131445.7, intron 18 of 21)	protein_coding-intron (ENSMUST00000014473.5, intron 18 of 21)	15978	ENSMUST00000144740.1	ENSMUSG00000014329	ENSMUST00000144740			Bicc1			protein_coding
e11ve16_cond1_1760	chr10	70939692	70939892	+	4.07876	NA	intron (ENSMUST00000143791.7, intron 17 of 20)	protein_coding-intron (ENSMUST00000014473.5, intron 17 of 21)	8697	ENSMUST00000144740.1	ENSMUSG00000014329	ENSMUST00000144740			Bicc1			protein_coding
e11ve16_cond1_1761	chr10	70949339	70949638	+	4.70646	NA	promoter-TSS (ENSMUST00000144740.1)	protein_coding-promoter-TSS (ENSMUST00000144740.1)	-999	ENSMUST00000144740.1	ENSMUSG00000014329	ENSMUST00000144740			Bicc1			protein_coding
e11ve16_cond1_1762	chr10	71027832	71028292	+	5.8411	NA	intron (ENSMUST00000131445.7, intron 2 of 21)	protein_coding-intron (ENSMUST00000014473.5, intron 2 of 21)	-35022	ENSMUST00000219321.1	ENSMUSG00000112745	ENSMUST00000219321			Gm48025			lncRNA
e11ve16_cond1_1763	chr10	71159591	71159931	+	16.4249	NA	promoter-TSS (ENSMUST00000014473.5)	protein_coding-promoter-TSS (ENSMUST00000014473.5)	-61	ENSMUST00000143791.7	ENSMUSG00000014329	ENSMUST00000144740			Bicc1			protein_coding
e11ve16_cond1_1764	chr10	71291420	71291661	+	3.1758	NA	exon (ENSMUST00000218529.1, exon 2 of 2)	lncRNA-exon (ENSMUST00000218529.1, exon 2 of 2)	3811	ENSMUST00000218529.1	ENSMUSG00000112813	ENSMUST00000218529			Gm34376			lncRNA
e11ve16_cond1_1765	chr10	71428231	71428617	+	3.28264	NA	intron (ENSMUST00000145521.1, intron 1 of 1)	protein_coding-intron (ENSMUST00000141984.1, intron 2 of 2)	19061	ENSMUST00000145521.1	ENSMUSG00000060733	ENSMUST00000121446			Ipmk			protein_coding
e11ve16_cond1_1766	chr10	71501915	71502522	+	19.294	NA	Intergenic	Intergenic	-16698	ENSMUST00000219700.1	ENSMUSG00000112108	ENSMUST00000219700			4930551I15Rik			lncRNA
e11ve16_cond1_1767	chr10	72609750	72609977	+	5.06139	NA	Intergenic	Intergenic	-44982	ENSMUST00000020081.10	ENSMUSG00000019923	ENSMUST00000105431			Zwint			protein_coding
e11ve16_cond1_1768	chr10	72634030	72634565	+	5.49371	NA	Intergenic	Intergenic	-20548	ENSMUST00000020081.10	ENSMUSG00000019923	ENSMUST00000105431			Zwint			protein_coding
e11ve16_cond1_1769	chr10	73030208	73030795	+	5.29093	NA	intron (ENSMUST00000220010.1, intron 1 of 4)	lncRNA-intron (ENSMUST00000219536.1, intron 1 of 2)	56198	ENSMUST00000219920.1	ENSMUSG00000111994	ENSMUST00000219536			A330049N07Rik			lncRNA
e11ve16_cond1_1770	chr10	73097993	73098313	+	3.62976	NA	Intergenic	Intergenic	-1189	ENSMUST00000123398.8	ENSMUSG00000052613	ENSMUST00000136096			Pcdh15			protein_coding
e11ve16_cond1_1771	chr10	73098489	73100336	+	9.66545	NA	promoter-TSS (ENSMUST00000123398.8)	protein_coding-promoter-TSS (ENSMUST00000123398.8)	-23	ENSMUST00000148572.1	ENSMUSG00000052613	ENSMUST00000136096			Pcdh15			protein_coding
e11ve16_cond1_1772	chr10	73817917	73818393	+	4.74769	NA	intron (ENSMUST00000123398.8, intron 3 of 13)	protein_coding-intron (ENSMUST00000123398.8, intron 3 of 13)	-3712	ENSMUST00000193174.5	ENSMUSG00000052613	ENSMUST00000136096			Pcdh15			protein_coding
e11ve16_cond1_1773	chr10	73823028	73823354	+	13.8569	NA	intron (ENSMUST00000105426.9, intron 1 of 32)	protein_coding-intron (ENSMUST00000064562.13, intron 1 of 30)	1248	ENSMUST00000134009.8	ENSMUSG00000052613	ENSMUST00000136096			Pcdh15			protein_coding
e11ve16_cond1_1774	chr10	74966419	74966707	+	3.57741	NA	promoter-TSS (ENSMUST00000037813.4)	protein_coding-promoter-TSS (ENSMUST00000037813.4)	-614	ENSMUST00000037813.4	ENSMUSG00000040009	ENSMUST00000160421			Gnaz			protein_coding
e11ve16_cond1_1775	chr10	74967426	74968570	+	10.445	NA	intron (ENSMUST00000160421.2, intron 1 of 1)	protein_coding-intron (ENSMUST00000009214.9, intron 4 of 6)	789	ENSMUST00000160421.2	ENSMUSG00000040009	ENSMUST00000160421			Gnaz			protein_coding
e11ve16_cond1_1776	chr10	74990062	74990419	+	5.27589	NA	promoter-TSS (ENSMUST00000159991.1)	protein_coding-promoter-TSS (ENSMUST00000159991.1)	-601	ENSMUST00000159991.1	ENSMUSG00000040009	ENSMUST00000160421			Gnaz			protein_coding
e11ve16_cond1_1777	chr10	74994932	74995864	+	6.93615	NA	intron (ENSMUST00000159991.1, intron 1 of 1)	protein_coding-intron (ENSMUST00000009214.9, intron 4 of 6)	4557	ENSMUST00000159991.1	ENSMUSG00000040009	ENSMUST00000160421			Gnaz			protein_coding
e11ve16_cond1_1778	chr10	75003773	75004021	+	3.36534	NA	intron (ENSMUST00000159991.1, intron 1 of 1)	protein_coding-intron (ENSMUST00000009214.9, intron 4 of 6)	13056	ENSMUST00000159991.1	ENSMUSG00000040009	ENSMUST00000160421			Gnaz			protein_coding
e11ve16_cond1_1779	chr10	75004236	75004775	+	4.80221	NA	intron (ENSMUST00000159991.1, intron 1 of 1)	protein_coding-intron (ENSMUST00000009214.9, intron 4 of 6)	13664	ENSMUST00000159991.1	ENSMUSG00000040009	ENSMUST00000160421			Gnaz			protein_coding
e11ve16_cond1_1780	chr10	75036464	75036989	+	6.28826	NA	promoter-TSS (ENSMUST00000020391.12)	protein_coding-promoter-TSS (ENSMUST00000020391.12)	-332	ENSMUST00000136944.7	ENSMUSG00000020175	ENSMUST00000122815			Rab36			protein_coding
e11ve16_cond1_1781	chr10	75059231	75059489	+	4.54773	NA	Intergenic	Intergenic	-1232	ENSMUST00000164107.2	ENSMUSG00000009681	ENSMUST00000164107			Bcr			protein_coding
e11ve16_cond1_1782	chr10	75059960	75060537	+	4.02483	NA	promoter-TSS (ENSMUST00000164107.2)	protein_coding-promoter-TSS (ENSMUST00000164107.2)	-344	ENSMUST00000164107.2	ENSMUSG00000009681	ENSMUST00000164107			Bcr			protein_coding
e11ve16_cond1_1783	chr10	75061135	75061636	+	7.17333	NA	exon (ENSMUST00000164107.2, exon 1 of 23)	protein_coding-exon (ENSMUST00000164107.2, exon 1 of 23)	793	ENSMUST00000164107.2	ENSMUSG00000009681	ENSMUST00000164107			Bcr			protein_coding
e11ve16_cond1_1784	chr10	75069415	75069806	+	5.52709	NA	intron (ENSMUST00000164107.2, intron 1 of 22)	protein_coding-intron (ENSMUST00000164107.2, intron 1 of 22)	9018	ENSMUST00000164107.2	ENSMUSG00000009681	ENSMUST00000164107			Bcr			protein_coding
e11ve16_cond1_1785	chr10	75093352	75093822	+	4.51168	NA	intron (ENSMUST00000164107.2, intron 1 of 22)	protein_coding-intron (ENSMUST00000164107.2, intron 1 of 22)	32995	ENSMUST00000164107.2	ENSMUSG00000009681	ENSMUST00000164107			Bcr			protein_coding
e11ve16_cond1_1786	chr10	75252046	75253039	+	8.16163	NA	intron (ENSMUST00000218766.1, intron 5 of 15)	protein_coding-intron (ENSMUST00000040105.7, intron 5 of 15)	-8425	ENSMUST00000219430.1	ENSMUSG00000033444	ENSMUST00000219430			Specc1l			protein_coding
e11ve16_cond1_1787	chr10	75316806	75317022	+	3.49278	NA	promoter-TSS (ENSMUST00000105420.2)	protein_coding-promoter-TSS (ENSMUST00000105420.2)	37	ENSMUST00000105420.2	ENSMUSG00000020178	ENSMUST00000219044			Adora2a			protein_coding
e11ve16_cond1_1788	chr10	75413357	75413796	+	5.28804	NA	intron (ENSMUST00000132629.1, intron 2 of 3)	protein_coding-intron (ENSMUST00000039925.7, intron 2 of 9)	3533	ENSMUST00000132629.1	ENSMUSG00000033427	ENSMUST00000132629			Upb1			protein_coding
e11ve16_cond1_1789	chr10	75419252	75419579	+	6.39786	NA	intron (ENSMUST00000153125.7, intron 3 of 3)	protein_coding-intron (ENSMUST00000039925.7, intron 3 of 9)	-8766	ENSMUST00000129946.1	ENSMUSG00000033427	ENSMUST00000132629			Upb1			protein_coding
e11ve16_cond1_1790	chr10	75428464	75429473	+	10.6682	NA	intron (ENSMUST00000039925.7, intron 5 of 9)	protein_coding-intron (ENSMUST00000039925.7, intron 5 of 9)	787	ENSMUST00000129946.1	ENSMUSG00000033427	ENSMUST00000132629			Upb1			protein_coding
e11ve16_cond1_1791	chr10	75446562	75446816	+	5.06201	NA	intron (ENSMUST00000153125.7, intron 2 of 3)	protein_coding-intron (ENSMUST00000145890.7, intron 5 of 8)	4069	ENSMUST00000122673.1	ENSMUSG00000084622	ENSMUST00000122673			Gm25545			misc_RNA
e11ve16_cond1_1792	chr10	75474970	75475195	+	3.9485	NA	intron (ENSMUST00000153125.7, intron 2 of 3)	protein_coding-intron (ENSMUST00000145890.7, intron 5 of 8)	8310	ENSMUST00000218219.1	ENSMUSG00000112764	ENSMUST00000218219			Gm48158			processed_pseudogene
e11ve16_cond1_1793	chr10	75559491	75559958	+	6.13065	NA	intron (ENSMUST00000051129.9, intron 1 of 3)	protein_coding-intron (ENSMUST00000051129.9, intron 1 of 3)	606	ENSMUST00000051129.9	ENSMUSG00000046807	ENSMUST00000051129			Lrrc75b			protein_coding
e11ve16_cond1_1794	chr10	75684333	75684767	+	5.07451	NA	intron (ENSMUST00000001712.7, intron 28 of 36)	protein_coding-intron (ENSMUST00000001712.7, intron 28 of 36)	15825	ENSMUST00000218486.1	ENSMUSG00000020196	ENSMUST00000218878			Cabin1			protein_coding
e11ve16_cond1_1795	chr10	75764928	75765133	+	3.56798	NA	promoter-TSS (ENSMUST00000001712.7)	protein_coding-promoter-TSS (ENSMUST00000001712.7)	-689	ENSMUST00000218480.1	ENSMUSG00000020196	ENSMUST00000218878			Cabin1			protein_coding
e11ve16_cond1_1796	chr10	75772611	75773326	+	4.23367	NA	promoter-TSS (ENSMUST00000172820.1)	protein_coding-promoter-TSS (ENSMUST00000172820.1)	66	ENSMUST00000172820.1	ENSMUSG00000001666	ENSMUST00000172820			Ddt			protein_coding
e11ve16_cond1_1797	chr10	75780280	75780783	+	3.84639	NA	exon (ENSMUST00000218091.1, exon 1 of 1)	protein_coding-exon (ENSMUST00000218091.1, exon 1 of 1)	423	ENSMUST00000173512.1	ENSMUSG00000092360	ENSMUST00000173512			Gm20441			protein_coding
e11ve16_cond1_1798	chr10	75853732	75853949	+	4.31208	NA	Intergenic	Intergenic	6352	ENSMUST00000218267.1	ENSMUSG00000033307	ENSMUST00000218267			Mif			protein_coding
e11ve16_cond1_1799	chr10	75872987	75873645	+	6.41378	NA	Intergenic	Intergenic	-2115	ENSMUST00000220036.1	ENSMUSG00000112306	ENSMUST00000220036			Gm47744			processed_pseudogene
e11ve16_cond1_1800	chr10	75882070	75883331	+	7.22279	NA	Intergenic	Intergenic	7269	ENSMUST00000220036.1	ENSMUSG00000112306	ENSMUST00000220036			Gm47744			processed_pseudogene
e11ve16_cond1_1801	chr10	75950605	75950907	+	4.50012	NA	Intergenic	Intergenic	2456	ENSMUST00000000926.2	ENSMUSG00000000903	ENSMUST00000121151			Vpreb3			protein_coding
e11ve16_cond1_1802	chr10	75951151	75951639	+	3.61889	NA	Intergenic	Intergenic	3095	ENSMUST00000000926.2	ENSMUSG00000000903	ENSMUST00000121151			Vpreb3			protein_coding
e11ve16_cond1_1803	chr10	76046998	76047983	+	9.18247	NA	Intergenic	Intergenic	14836	ENSMUST00000061617.6	ENSMUSG00000049764	ENSMUST00000061617			Zfp280b			protein_coding
e11ve16_cond1_1804	chr10	76261069	76261496	+	3.82299	NA	TTS (ENSMUST00000036387.7)	protein_coding-TTS (ENSMUST00000036387.7)	4226	ENSMUST00000162524.1	ENSMUSG00000020231	ENSMUST00000160048			Dip2a			protein_coding
e11ve16_cond1_1805	chr10	76469220	76469434	+	3.42313	NA	promoter-TSS (ENSMUST00000049185.5)	protein_coding-promoter-TSS (ENSMUST00000049185.5)	-213	ENSMUST00000049185.5	ENSMUSG00000033126	ENSMUST00000218564			Ybey			protein_coding
e11ve16_cond1_1806	chr10	76584056	76584522	+	6.9122	NA	exon (ENSMUST00000001183.7, exon 9 of 14)	protein_coding-exon (ENSMUST00000001183.7, exon 9 of 14)	-2844	ENSMUST00000146344.1	ENSMUSG00000001155	ENSMUST00000001183			Ftcd			protein_coding
e11ve16_cond1_1807	chr10	76732882	76733488	+	6.01676	NA	Intergenic	Intergenic	-2912	ENSMUST00000218963.1	ENSMUSG00000112291	ENSMUST00000218963			Gm48276			lncRNA
e11ve16_cond1_1808	chr10	77032289	77032885	+	6.69665	NA	promoter-TSS (ENSMUST00000105410.9)	protein_coding-promoter-TSS (ENSMUST00000105410.9)	-97	ENSMUST00000144234.7	ENSMUSG00000001436	ENSMUST00000131031			Slc19a1			protein_coding
e11ve16_cond1_1809	chr10	77033905	77034116	+	3.64618	NA	intron (ENSMUST00000132984.1, intron 1 of 2)	protein_coding-intron (ENSMUST00000105410.9, intron 1 of 5)	691	ENSMUST00000132984.1	ENSMUSG00000001436	ENSMUST00000131031			Slc19a1			protein_coding
e11ve16_cond1_1810	chr10	77138199	77138706	+	8.60308	NA	TTS (ENSMUST00000218871.1)	processed_pseudogene-TTS (ENSMUST00000218871.1)	1352	ENSMUST00000218871.1	ENSMUSG00000112612	ENSMUST00000218871			Gm7775			processed_pseudogene
e11ve16_cond1_1811	chr10	77150652	77151032	+	4.96363	NA	intron (ENSMUST00000081654.12, intron 2 of 41)	protein_coding-intron (ENSMUST00000081654.12, intron 2 of 41)	13742	ENSMUST00000218871.1	ENSMUSG00000112612	ENSMUST00000218871			Gm7775			processed_pseudogene
e11ve16_cond1_1812	chr10	77152082	77152281	+	3.51829	NA	intron (ENSMUST00000081654.12, intron 2 of 41)	protein_coding-intron (ENSMUST00000081654.12, intron 2 of 41)	14367	ENSMUST00000081654.12	ENSMUSG00000001435	ENSMUST00000218407			Col18a1			protein_coding
e11ve16_cond1_1813	chr10	77164734	77166779	+	6.49972	NA	intron (ENSMUST00000081654.12, intron 2 of 41)	protein_coding-intron (ENSMUST00000081654.12, intron 2 of 41)	792	ENSMUST00000081654.12	ENSMUSG00000001435	ENSMUST00000218407			Col18a1			protein_coding
e11ve16_cond1_1814	chr10	77190700	77191839	+	8.02029	NA	Intergenic	Intergenic	-24721	ENSMUST00000081654.12	ENSMUSG00000001435	ENSMUST00000218407			Col18a1			protein_coding
e11ve16_cond1_1815	chr10	77334680	77335753	+	5.60492	NA	intron (ENSMUST00000149738.7, intron 2 of 4)	protein_coding-intron (ENSMUST00000149738.7, intron 2 of 4)	4960	ENSMUST00000146319.1	ENSMUSG00000020262	ENSMUST00000146319			Adarb1			protein_coding
e11ve16_cond1_1816	chr10	77340280	77340506	+	3.4242	NA	promoter-TSS (ENSMUST00000146319.1)	protein_coding-promoter-TSS (ENSMUST00000146319.1)	-217	ENSMUST00000146319.1	ENSMUSG00000020262	ENSMUST00000146319			Adarb1			protein_coding
e11ve16_cond1_1817	chr10	77417002	77417831	+	9.5602	NA	intron (ENSMUST00000105406.7, intron 1 of 11)	protein_coding-intron (ENSMUST00000105406.7, intron 1 of 11)	438	ENSMUST00000150512.7	ENSMUSG00000020262	ENSMUST00000146319			Adarb1			protein_coding
e11ve16_cond1_1818	chr10	77501036	77501302	+	7.44717	NA	intron (ENSMUST00000218414.1, intron 3 of 5)	protein_coding-intron (ENSMUST00000045454.8, intron 3 of 5)	6146	ENSMUST00000217681.1	ENSMUSG00000032977	ENSMUST00000045454			Fam207a			protein_coding
e11ve16_cond1_1819	chr10	77568720	77569434	+	4.5025	NA	Intergenic	Intergenic	-12643	ENSMUST00000009435.11	ENSMUSG00000009291	ENSMUST00000162943			Pttg1ip			protein_coding
e11ve16_cond1_1820	chr10	77622700	77623233	+	3.92594	NA	intron (ENSMUST00000172813.1, intron 1 of 3)	protein_coding-intron (ENSMUST00000172772.1, intron 1 of 4)	588	ENSMUST00000172772.1	ENSMUSG00000009293	ENSMUST00000172772			Ube2g2			protein_coding
e11ve16_cond1_1821	chr10	77685915	77686145	+	3.92665	NA	promoter-TSS (ENSMUST00000092366.3)	protein_coding-promoter-TSS (ENSMUST00000092366.3)	-539	ENSMUST00000092366.3	ENSMUSG00000069581	ENSMUST00000092368			Tspear			protein_coding
e11ve16_cond1_1822	chr10	77686365	77687352	+	7.30982	NA	exon (ENSMUST00000092366.3, exon 1 of 12)	protein_coding-exon (ENSMUST00000092366.3, exon 1 of 12)	289	ENSMUST00000092366.3	ENSMUSG00000069581	ENSMUST00000092368			Tspear			protein_coding
e11ve16_cond1_1823	chr10	77864636	77864927	+	3.73926	NA	exon (ENSMUST00000092366.3, exon 3 of 12)	protein_coding-exon (ENSMUST00000092366.3, exon 3 of 12)	158	ENSMUST00000092368.9	ENSMUSG00000069581	ENSMUST00000092368			Tspear			protein_coding
e11ve16_cond1_1824	chr10	77902537	77903141	+	3.98648	NA	promoter-TSS (ENSMUST00000057608.4)	protein_coding-promoter-TSS (ENSMUST00000057608.4)	-303	ENSMUST00000057608.4	ENSMUSG00000051652	ENSMUST00000057608			Lrrc3			protein_coding
e11ve16_cond1_1825	chr10	77969186	77969594	+	3.86406	NA	intron (ENSMUST00000105399.1, intron 1 of 4)	protein_coding-intron (ENSMUST00000105399.1, intron 1 of 4)	414	ENSMUST00000105399.1	ENSMUSG00000009292	ENSMUST00000153842			Trpm2			protein_coding
e11ve16_cond1_1826	chr10	78043047	78043364	+	3.77463	NA	intron (ENSMUST00000154374.1, intron 1 of 12)	protein_coding-intron (ENSMUST00000019257.14, intron 1 of 13)	367	ENSMUST00000143735.7	ENSMUSG00000000731	ENSMUST00000131028			Aire			protein_coding
e11ve16_cond1_1827	chr10	78101139	78101839	+	6.08653	NA	Intergenic	Intergenic	28150	ENSMUST00000219633.1	ENSMUSG00000000732	ENSMUST00000219038			Icosl			protein_coding
e11ve16_cond1_1828	chr10	78135354	78135662	+	3.25089	NA	intron (ENSMUST00000218616.1, intron 1 of 3)	lncRNA-intron (ENSMUST00000218616.1, intron 1 of 3)	2589	ENSMUST00000218616.1	ENSMUSG00000112662	ENSMUST00000218616			Gm47922			lncRNA
e11ve16_cond1_1829	chr10	78259704	78260528	+	9.46722	NA	intron (ENSMUST00000218662.1, intron 1 of 2)	lncRNA-intron (ENSMUST00000218143.1, intron 1 of 1)	-4005	ENSMUST00000218886.1	ENSMUSG00000112433	ENSMUST00000218662			Gm30122			lncRNA
e11ve16_cond1_1830	chr10	78287621	78288589	+	11.4821	NA	promoter-TSS (ENSMUST00000219932.1)	protein_coding-promoter-TSS (ENSMUST00000219932.1)	-80	ENSMUST00000219932.1	ENSMUSG00000001211	ENSMUST00000139282			Agpat3			protein_coding
e11ve16_cond1_1831	chr10	78317458	78317971	+	4.7712	NA	intron (ENSMUST00000001240.11, intron 2 of 9)	protein_coding-intron (ENSMUST00000001240.11, intron 2 of 9)	2976	ENSMUST00000139282.7	ENSMUSG00000001211	ENSMUST00000139282			Agpat3			protein_coding
e11ve16_cond1_1832	chr10	78351849	78352099	+	4.59222	NA	promoter-TSS (ENSMUST00000105388.7)	protein_coding-promoter-TSS (ENSMUST00000105388.7)	79	ENSMUST00000105388.7	ENSMUSG00000001211	ENSMUST00000139282			Agpat3			protein_coding
e11ve16_cond1_1833	chr10	78395808	78396255	+	4.99546	NA	Intergenic	Intergenic	2711	ENSMUST00000072739.5	ENSMUSG00000064317	ENSMUST00000072739			Gm10146			processed_pseudogene
e11ve16_cond1_1834	chr10	78747157	78747435	+	4.75632	NA	exon (ENSMUST00000105383.3, exon 7 of 7)	protein_coding-exon (ENSMUST00000105383.3, exon 7 of 7)	137	ENSMUST00000209307.1	ENSMUSG00000109776	ENSMUST00000209307			Gm30400			lncRNA
e11ve16_cond1_1835	chr10	78787638	78787842	+	4.07996	NA	intron (ENSMUST00000217717.1, intron 1 of 3)	protein_coding-intron (ENSMUST00000005490.9, intron 1 of 9)	7038	ENSMUST00000217717.1	ENSMUSG00000005357	ENSMUST00000217717			Slc1a6			protein_coding
e11ve16_cond1_1836	chr10	79106377	79106648	+	5.69308	NA	Intergenic	Intergenic	-8912	ENSMUST00000039271.6	ENSMUSG00000060301	ENSMUST00000220220			2610008E11Rik			protein_coding
e11ve16_cond1_1837	chr10	79612400	79613837	+	9.39153	NA	exon (ENSMUST00000059699.8, exon 2 of 2)	protein_coding-exon (ENSMUST00000059699.8, exon 2 of 2)	882	ENSMUST00000059699.8	ENSMUSG00000045912	ENSMUST00000178228			C2cd4c			protein_coding
e11ve16_cond1_1838	chr10	79636992	79639083	+	19.8595	NA	promoter-TSS (ENSMUST00000020564.6)	protein_coding-promoter-TSS (ENSMUST00000020564.6)	-119	ENSMUST00000020564.6	ENSMUSG00000020312	ENSMUST00000166450			Shc2			protein_coding
e11ve16_cond1_1839	chr10	79649307	79649622	+	9.2698	NA	Intergenic	Intergenic	-3726	ENSMUST00000095464.2	ENSMUSG00000035963	ENSMUST00000095464			Odf3l2			protein_coding
e11ve16_cond1_1840	chr10	79668842	79669142	+	3.72439	NA	promoter-TSS (ENSMUST00000020552.6)	protein_coding-promoter-TSS (ENSMUST00000020552.6)	-377	ENSMUST00000020552.6	ENSMUSG00000020308	ENSMUST00000220175			Tpgs1			protein_coding
e11ve16_cond1_1841	chr10	79669476	79670063	+	4.30669	NA	promoter-TSS (ENSMUST00000219585.1)	protein_coding-promoter-TSS (ENSMUST00000219585.1)	-114	ENSMUST00000219585.1	ENSMUSG00000020308	ENSMUST00000220175			Tpgs1			protein_coding
e11ve16_cond1_1842	chr10	79682295	79682989	+	6.43381	NA	intron (ENSMUST00000220133.1, intron 1 of 3)	protein_coding-intron (ENSMUST00000020550.12, intron 1 of 4)	116	ENSMUST00000217689.1	ENSMUSG00000020307	ENSMUST00000220328			Cdc34			protein_coding
e11ve16_cond1_1843	chr10	79754783	79755134	+	8.08488	NA	promoter-TSS (ENSMUST00000020577.3)	protein_coding-promoter-TSS (ENSMUST00000020577.3)	-118	ENSMUST00000219228.1	ENSMUSG00000020327	ENSMUST00000020577			Fgf22			protein_coding
e11ve16_cond1_1844	chr10	79767597	79768561	+	9.5552	NA	Intergenic	Intergenic	-1127	ENSMUST00000047203.8	ENSMUSG00000035890	ENSMUST00000047203			Rnf126			protein_coding
e11ve16_cond1_1845	chr10	79793117	79794718	+	5.96377	NA	exon (ENSMUST00000219552.1, exon 2 of 2)	lncRNA-exon (ENSMUST00000219552.1, exon 2 of 2)	250	ENSMUST00000218631.1	ENSMUSG00000035863	ENSMUST00000046945			Palm			protein_coding
e11ve16_cond1_1846	chr10	79803615	79803819	+	4.68776	NA	intron (ENSMUST00000105379.2, intron 1 of 7)	protein_coding-intron (ENSMUST00000046945.12, intron 1 of 8)	-2301	ENSMUST00000217759.1	ENSMUSG00000035863	ENSMUST00000046945			Palm			protein_coding
e11ve16_cond1_1847	chr10	79873557	79874946	+	9.29248	NA	promoter-TSS (ENSMUST00000163188.7)	protein_coding-promoter-TSS (ENSMUST00000163188.7)	-27	ENSMUST00000167897.7	ENSMUSG00000035835	ENSMUST00000113452			Plppr3			protein_coding
e11ve16_cond1_1848	chr10	79909212	79909559	+	7.03296	NA	promoter-TSS (ENSMUST00000105378.8)	protein_coding-promoter-TSS (ENSMUST00000105378.8)	190	ENSMUST00000178620.1	ENSMUSG00000095023	ENSMUST00000178620			Gm24019			snRNA
e11ve16_cond1_1849	chr10	79920798	79921037	+	3.78931	NA	exon (ENSMUST00000219883.1, exon 2 of 4)	protein_coding-exon (ENSMUST00000219883.1, exon 2 of 4)	291	ENSMUST00000219867.1	ENSMUSG00000035781	ENSMUST00000218750			R3hdm4			protein_coding
e11ve16_cond1_1850	chr10	79927017	79928523	+	7.1893	NA	intron (ENSMUST00000105376.1, intron 1 of 8)	protein_coding-intron (ENSMUST00000019708.11, intron 1 of 8)	429	ENSMUST00000105376.1	ENSMUSG00000019564	ENSMUST00000105377			Arid3a			protein_coding
e11ve16_cond1_1851	chr10	79960192	79960564	+	4.58329	NA	intron (ENSMUST00000045247.8, intron 1 of 9)	protein_coding-intron (ENSMUST00000045247.8, intron 1 of 9)	223	ENSMUST00000220272.1	ENSMUSG00000035754	ENSMUST00000045247			Wdr18			protein_coding
e11ve16_cond1_1852	chr10	79970671	79971495	+	5.60266	NA	TTS (ENSMUST00000045247.8)	protein_coding-TTS (ENSMUST00000045247.8)	368	ENSMUST00000045085.7	ENSMUSG00000035745	ENSMUST00000149148			Grin3b			protein_coding
e11ve16_cond1_1853	chr10	79984033	79984271	+	5.64348	NA	promoter-TSS (ENSMUST00000124536.1)	protein_coding-promoter-TSS (ENSMUST00000124536.1)	-112	ENSMUST00000124536.1	ENSMUSG00000013858	ENSMUST00000132080			Tmem259			protein_coding
e11ve16_cond1_1854	chr10	79996389	79997635	+	6.17123	NA	promoter-TSS (ENSMUST00000043866.7)	protein_coding-promoter-TSS (ENSMUST00000043866.7)	518	ENSMUST00000132517.7	ENSMUSG00000035722	ENSMUST00000132517			Abca7			protein_coding
e11ve16_cond1_1855	chr10	80039255	80039473	+	3.34287	NA	intron (ENSMUST00000143438.7, intron 1 of 3)	protein_coding-intron (ENSMUST00000004786.9, intron 1 of 6)	286	ENSMUST00000131743.7	ENSMUSG00000004667	ENSMUST00000004786			Polr2e			protein_coding
e11ve16_cond1_1856	chr10	80054172	80054571	+	4.51985	NA	promoter-TSS (ENSMUST00000183037.1)	protein_coding-promoter-TSS (ENSMUST00000183037.1)	-94	ENSMUST00000183037.1	ENSMUSG00000075706	ENSMUST00000105372			Gpx4			protein_coding
e11ve16_cond1_1857	chr10	80136428	80136687	+	7.53613	NA	promoter-TSS (ENSMUST00000132317.7)	protein_coding-promoter-TSS (ENSMUST00000132317.7)	795	ENSMUST00000128465.7	ENSMUSG00000035640	ENSMUST00000170219			Cbarp			protein_coding
e11ve16_cond1_1858	chr10	80137241	80137824	+	5.97984	NA	promoter-TSS (ENSMUST00000127515.1)	protein_coding-promoter-TSS (ENSMUST00000127515.1)	62	ENSMUST00000127515.1	ENSMUSG00000035640	ENSMUST00000170219			Cbarp			protein_coding
e11ve16_cond1_1859	chr10	80138311	80138803	+	8.95637	NA	promoter-TSS (ENSMUST00000127515.1)	protein_coding-promoter-TSS (ENSMUST00000127515.1)	59	ENSMUST00000138776.7	ENSMUSG00000035640	ENSMUST00000170219			Cbarp			protein_coding
e11ve16_cond1_1860	chr10	80149600	80150215	+	4.86016	NA	promoter-TSS (ENSMUST00000124179.1)	protein_coding-promoter-TSS (ENSMUST00000124179.1)	21	ENSMUST00000124179.1	ENSMUSG00000035621	ENSMUST00000151202			Midn			protein_coding
e11ve16_cond1_1861	chr10	80150367	80151063	+	12.7782	NA	promoter-TSS (ENSMUST00000144526.1)	protein_coding-promoter-TSS (ENSMUST00000144526.1)	258	ENSMUST00000153477.7	ENSMUSG00000035621	ENSMUST00000151202			Midn			protein_coding
e11ve16_cond1_1862	chr10	80167992	80168534	+	4.99847	NA	intron (ENSMUST00000140774.1, intron 1 of 5)	protein_coding-intron (ENSMUST00000054666.6, intron 1 of 7)	377	ENSMUST00000140774.1	ENSMUSG00000045193	ENSMUST00000054666			Cirbp			protein_coding
e11ve16_cond1_1863	chr10	80190428	80190722	+	4.30207	NA	TTS (ENSMUST00000003154.6)	protein_coding-TTS (ENSMUST00000003154.6)	11093	ENSMUST00000003154.6	ENSMUSG00000003070	ENSMUST00000003154			Efna2			protein_coding
e11ve16_cond1_1864	chr10	80190860	80191400	+	6.98535	NA	Intergenic	Intergenic	11648	ENSMUST00000003154.6	ENSMUSG00000003070	ENSMUST00000003154			Efna2			protein_coding
e11ve16_cond1_1865	chr10	80245188	80245717	+	4.18975	NA	Intergenic	Intergenic	2840	ENSMUST00000136791.1	ENSMUSG00000020156	ENSMUST00000138801			Pwwp3a			protein_coding
e11ve16_cond1_1866	chr10	80245862	80246081	+	3.38984	NA	Intergenic	Intergenic	-3150	ENSMUST00000105364.7	ENSMUSG00000020153	ENSMUST00000155523			Ndufs7			protein_coding
e11ve16_cond1_1867	chr10	80292731	80293000	+	4.87908	NA	intron (ENSMUST00000068408.13, intron 2 of 3)	protein_coding-intron (ENSMUST00000062674.6, intron 1 of 2)	220	ENSMUST00000062674.6	ENSMUSG00000063457	ENSMUST00000062674			Rps15			protein_coding
e11ve16_cond1_1868	chr10	80295473	80296309	+	10.6197	NA	promoter-TSS (ENSMUST00000105359.7)	protein_coding-promoter-TSS (ENSMUST00000105359.7)	-86	ENSMUST00000105359.7	ENSMUSG00000020135	ENSMUST00000105359			Apc2			protein_coding
e11ve16_cond1_1869	chr10	80348581	80349227	+	5.39679	NA	promoter-TSS (ENSMUST00000095446.9)	protein_coding-promoter-TSS (ENSMUST00000095446.9)	-492	ENSMUST00000105352.1	ENSMUSG00000043822	ENSMUST00000138705			Adamtsl5			protein_coding
e11ve16_cond1_1870	chr10	80350036	80350520	+	5.11452	NA	Intergenic	Intergenic	-1866	ENSMUST00000105352.1	ENSMUSG00000043822	ENSMUST00000138705			Adamtsl5			protein_coding
e11ve16_cond1_1871	chr10	80356398	80356940	+	7.85594	NA	intron (ENSMUST00000039836.14, intron 1 of 14)	protein_coding-intron (ENSMUST00000039836.14, intron 1 of 14)	210	ENSMUST00000105351.1	ENSMUSG00000035486	ENSMUST00000152544			Plk5			protein_coding
e11ve16_cond1_1872	chr10	80371574	80372049	+	3.97034	NA	promoter-TSS (ENSMUST00000138988.1)	lncRNA-promoter-TSS (ENSMUST00000138988.1)	-87	ENSMUST00000138988.1	ENSMUSG00000087432	ENSMUST00000138988			Gm15123			lncRNA
e11ve16_cond1_1873	chr10	80385911	80386255	+	3.79745	NA	intron (ENSMUST00000105350.2, intron 1 of 1)	protein_coding-intron (ENSMUST00000105350.2, intron 1 of 1)	1576	ENSMUST00000105350.2	ENSMUSG00000048696	ENSMUST00000123141			Mex3d			protein_coding
e11ve16_cond1_1874	chr10	80386439	80386717	+	4.3175	NA	intron (ENSMUST00000105350.2, intron 1 of 1)	protein_coding-intron (ENSMUST00000105350.2, intron 1 of 1)	1081	ENSMUST00000105350.2	ENSMUSG00000048696	ENSMUST00000123141			Mex3d			protein_coding
e11ve16_cond1_1875	chr10	80387239	80387859	+	11.4803	NA	exon (ENSMUST00000105350.2, exon 1 of 2)	protein_coding-exon (ENSMUST00000105350.2, exon 1 of 2)	110	ENSMUST00000105350.2	ENSMUSG00000048696	ENSMUST00000123141			Mex3d			protein_coding
e11ve16_cond1_1876	chr10	80397600	80397967	+	3.7838	NA	intron (ENSMUST00000105349.7, intron 1 of 6)	protein_coding-intron (ENSMUST00000092295.9, intron 1 of 6)	1639	ENSMUST00000105348.7	ENSMUSG00000035478	ENSMUST00000092295			Mbd3			protein_coding
e11ve16_cond1_1877	chr10	80406262	80406588	+	3.48604	NA	intron (ENSMUST00000020372.5, intron 1 of 2)	protein_coding-intron (ENSMUST00000020372.5, intron 1 of 2)	341	ENSMUST00000138428.7	ENSMUSG00000020163	ENSMUST00000138428			Uqcr11			protein_coding
e11ve16_cond1_1878	chr10	80406790	80407079	+	3.43081	NA	promoter-TSS (ENSMUST00000020372.5)	protein_coding-promoter-TSS (ENSMUST00000020372.5)	-104	ENSMUST00000020372.5	ENSMUSG00000020163	ENSMUST00000138428			Uqcr11			protein_coding
e11ve16_cond1_1879	chr10	80407273	80407610	+	5.22715	NA	promoter-TSS (ENSMUST00000020372.5)	protein_coding-promoter-TSS (ENSMUST00000020372.5)	-611	ENSMUST00000020372.5	ENSMUSG00000020163	ENSMUST00000138428			Uqcr11			protein_coding
e11ve16_cond1_1880	chr10	80432956	80433726	+	9.52353	NA	exon (ENSMUST00000020377.12, exon 1 of 19)	protein_coding-exon (ENSMUST00000020377.12, exon 1 of 19)	280	ENSMUST00000105346.9	ENSMUSG00000020167	ENSMUST00000105342			Tcf3			protein_coding
e11ve16_cond1_1881	chr10	80475433	80475916	+	4.24364	NA	promoter-TSS (ENSMUST00000158603.1)	snRNA-promoter-TSS (ENSMUST00000158603.1)	-678	ENSMUST00000158603.1	ENSMUSG00000089228	ENSMUST00000158603			Gm25044			snRNA
e11ve16_cond1_1882	chr10	80494857	80495236	+	4.68049	NA	exon (ENSMUST00000051773.8, exon 1 of 2)	protein_coding-exon (ENSMUST00000051773.8, exon 1 of 2)	211	ENSMUST00000051773.8	ENSMUSG00000045518	ENSMUST00000051773			Onecut3			protein_coding
e11ve16_cond1_1883	chr10	80495401	80495884	+	7.57133	NA	exon (ENSMUST00000051773.8, exon 1 of 2)	protein_coding-exon (ENSMUST00000051773.8, exon 1 of 2)	807	ENSMUST00000051773.8	ENSMUSG00000045518	ENSMUST00000051773			Onecut3			protein_coding
e11ve16_cond1_1884	chr10	80548514	80548842	+	5.23415	NA	promoter-TSS (ENSMUST00000182260.7)	protein_coding-promoter-TSS (ENSMUST00000182260.7)	-757	ENSMUST00000182260.7	ENSMUSG00000047417	ENSMUST00000182260			Rexo1			protein_coding
e11ve16_cond1_1885	chr10	80655921	80656750	+	4.35611	NA	promoter-TSS (ENSMUST00000131876.1)	protein_coding-promoter-TSS (ENSMUST00000131876.1)	159	ENSMUST00000126980.7	ENSMUSG00000003344	ENSMUST00000131876			Btbd2			protein_coding
e11ve16_cond1_1886	chr10	80807492	80808236	+	4.50287	NA	TTS (ENSMUST00000020435.10)	protein_coding-TTS (ENSMUST00000020435.10)	2621	ENSMUST00000036016.5	ENSMUSG00000035262	ENSMUST00000036016			Amh			protein_coding
e11ve16_cond1_1887	chr10	80831154	80831692	+	11.4026	NA	Intergenic	Intergenic	2626	ENSMUST00000157368.1	ENSMUSG00000087993	ENSMUST00000157368			Mir1982			miRNA
e11ve16_cond1_1888	chr10	80843467	80844173	+	6.80768	NA	promoter-TSS (ENSMUST00000219924.1)	protein_coding-promoter-TSS (ENSMUST00000219924.1)	-22	ENSMUST00000219924.1	ENSMUSG00000051067	ENSMUST00000219924			Lingo3			protein_coding
e11ve16_cond1_1889	chr10	80857445	80857972	+	3.95233	NA	intron (ENSMUST00000218727.1, intron 1 of 1)	protein_coding-intron (ENSMUST00000035597.9, intron 1 of 14)	587	ENSMUST00000220091.1	ENSMUSG00000035206	ENSMUST00000219366			Sppl2b			protein_coding
e11ve16_cond1_1890	chr10	80917470	80917865	+	3.92306	NA	exon (ENSMUST00000159094.1, exon 1 of 2)	protein_coding-exon (ENSMUST00000159094.1, exon 1 of 2)	184	ENSMUST00000159094.1	ENSMUSG00000062075	ENSMUST00000179022			Lmnb2			protein_coding
e11ve16_cond1_1891	chr10	80928648	80929124	+	3.27723	NA	Intergenic	Intergenic	-1187	ENSMUST00000015456.9	ENSMUSG00000015312	ENSMUST00000219449			Gadd45b			protein_coding
e11ve16_cond1_1892	chr10	80987767	80988195	+	5.93105	NA	intron (ENSMUST00000126317.1, intron 2 of 4)	protein_coding-intron (ENSMUST00000126317.1, intron 2 of 4)	10209	ENSMUST00000118465.7	ENSMUSG00000048240	ENSMUST00000118465			Gng7			protein_coding
e11ve16_cond1_1893	chr10	81070534	81070759	+	3.7364	NA	intron (ENSMUST00000171484.7, intron 1 of 3)	protein_coding-intron (ENSMUST00000005057.6, intron 1 of 12)	487	ENSMUST00000171484.7	ENSMUSG00000004929	ENSMUST00000167658			Thop1			protein_coding
e11ve16_cond1_1894	chr10	81105979	81106562	+	5.00461	NA	promoter-TSS (ENSMUST00000136743.1)	protein_coding-promoter-TSS (ENSMUST00000136743.1)	-75	ENSMUST00000136743.1	ENSMUSG00000035027	ENSMUST00000123241			Map2k2			protein_coding
e11ve16_cond1_1895	chr10	81136851	81137297	+	3.8018	NA	promoter-TSS (ENSMUST00000117956.1)	protein_coding-promoter-TSS (ENSMUST00000117956.1)	496	ENSMUST00000121840.7	ENSMUSG00000035011	ENSMUST00000121840			Zbtb7a			protein_coding
e11ve16_cond1_1896	chr10	81175815	81176104	+	4.29433	NA	promoter-TSS (ENSMUST00000047864.10)	protein_coding-promoter-TSS (ENSMUST00000047864.10)	-672	ENSMUST00000047864.10	ENSMUSG00000034994	ENSMUST00000219497			Eef2			protein_coding
e11ve16_cond1_1897	chr10	81184355	81184994	+	5.2071	NA	promoter-TSS (ENSMUST00000056086.4)	TEC-promoter-TSS (ENSMUST00000056086.4)	756	ENSMUST00000219850.1	ENSMUSG00000034974	ENSMUST00000219329			Dapk3			protein_coding
e11ve16_cond1_1898	chr10	81257309	81257824	+	4.0425	NA	promoter-TSS (ENSMUST00000120265.1)	protein_coding-promoter-TSS (ENSMUST00000120265.1)	118	ENSMUST00000126720.7	ENSMUSG00000004933	ENSMUST00000120265			Matk			protein_coding
e11ve16_cond1_1899	chr10	81358011	81358479	+	4.21495	NA	intron (ENSMUST00000132368.1, intron 1 of 2)	protein_coding-intron (ENSMUST00000044844.8, intron 1 of 9)	693	ENSMUST00000132368.1	ENSMUSG00000034854	ENSMUST00000132368			Mfsd12			protein_coding
e11ve16_cond1_1900	chr10	81377188	81377512	+	7.66531	NA	intron (ENSMUST00000127203.1, intron 1 of 1)	protein_coding-intron (ENSMUST00000020457.13, intron 1 of 13)	1030	ENSMUST00000127203.1	ENSMUSG00000020235	ENSMUST00000020457			Fzr1			protein_coding
e11ve16_cond1_1901	chr10	81377795	81378159	+	4.39621	NA	intron (ENSMUST00000127203.1, intron 1 of 1)	protein_coding-intron (ENSMUST00000020457.13, intron 1 of 13)	403	ENSMUST00000127203.1	ENSMUSG00000020235	ENSMUST00000020457			Fzr1			protein_coding
e11ve16_cond1_1902	chr10	81401282	81402370	+	8.70244	NA	intron (ENSMUST00000140916.7, intron 2 of 2)	protein_coding-intron (ENSMUST00000020461.14, intron 9 of 9)	-1272	ENSMUST00000152670.1	ENSMUSG00000055053	ENSMUST00000105321			Nfic			protein_coding
e11ve16_cond1_1903	chr10	81407712	81408240	+	4.73246	NA	promoter-TSS (ENSMUST00000140916.7)	protein_coding-promoter-TSS (ENSMUST00000140916.7)	-335	ENSMUST00000140916.7	ENSMUSG00000055053	ENSMUST00000105321			Nfic			protein_coding
e11ve16_cond1_1904	chr10	81415971	81416549	+	6.57537	NA	promoter-TSS (ENSMUST00000199973.1)	miRNA-promoter-TSS (ENSMUST00000199973.1)	37	ENSMUST00000199973.1	ENSMUSG00000105379	ENSMUST00000199973			Mir1191b			miRNA
e11ve16_cond1_1905	chr10	81484257	81484553	+	3.58432	NA	Intergenic	Intergenic	-1696	ENSMUST00000118763.7	ENSMUSG00000034818	ENSMUST00000119060			Celf5			protein_coding
e11ve16_cond1_1906	chr10	81535016	81535411	+	4.05376	NA	promoter-TSS (ENSMUST00000134354.1)	protein_coding-promoter-TSS (ENSMUST00000134354.1)	-80	ENSMUST00000134354.1	ENSMUSG00000034781	ENSMUST00000043604			Gna11			protein_coding
e11ve16_cond1_1907	chr10	81544339	81544581	+	5.71914	NA	intron (ENSMUST00000043604.5, intron 1 of 6)	protein_coding-intron (ENSMUST00000043604.5, intron 1 of 6)	730	ENSMUST00000043604.5	ENSMUSG00000034781	ENSMUST00000043604			Gna11			protein_coding
e11ve16_cond1_1908	chr10	81569033	81569238	+	4.45951	NA	Intergenic	Intergenic	3873	ENSMUST00000218432.1	ENSMUSG00000054452	ENSMUST00000218574			Tle5			protein_coding
e11ve16_cond1_1909	chr10	81687479	81687866	+	4.93133	NA	Intergenic	Intergenic	6513	ENSMUST00000219637.1	ENSMUSG00000112001	ENSMUST00000219637			Gm8112			processed_pseudogene
e11ve16_cond1_1910	chr10	81770513	81771632	+	8.96307	NA	promoter-TSS (ENSMUST00000218939.1)	protein_coding-promoter-TSS (ENSMUST00000218939.1)	70	ENSMUST00000218939.1	ENSMUSG00000094622	ENSMUST00000219864			Gm3055			protein_coding
e11ve16_cond1_1911	chr10	81846503	81846970	+	6.23414	NA	Intergenic	Intergenic	6542	ENSMUST00000218997.1	ENSMUSG00000112697	ENSMUST00000218997			Gm8137			processed_pseudogene
e11ve16_cond1_1912	chr10	81929984	81930514	+	6.40314	NA	intron (ENSMUST00000219144.1, intron 1 of 3)	protein_coding-intron (ENSMUST00000219144.1, intron 1 of 3)	231	ENSMUST00000219144.1	ENSMUSG00000096718	ENSMUST00000219144			Zfp781			protein_coding
e11ve16_cond1_1913	chr10	82623482	82623733	+	4.48435	NA	promoter-TSS (ENSMUST00000079648.11)	protein_coding-promoter-TSS (ENSMUST00000079648.11)	-379	ENSMUST00000185168.7	ENSMUSG00000063320	ENSMUST00000079648			1190007I07Rik			protein_coding
e11ve16_cond1_1914	chr10	82763420	82763973	+	13.79	NA	promoter-TSS (ENSMUST00000127832.1)	protein_coding-promoter-TSS (ENSMUST00000127832.1)	-33	ENSMUST00000127832.1	ENSMUSG00000020248	ENSMUST00000128397			Nfyb			protein_coding
e11ve16_cond1_1915	chr10	82833901	82834102	+	6.69483	NA	promoter-TSS (ENSMUST00000219368.1)	protein_coding-promoter-TSS (ENSMUST00000219368.1)	50	ENSMUST00000219368.1	ENSMUSG00000020250	ENSMUST00000219442			Txnrd1			protein_coding
e11ve16_cond1_1916	chr10	82834272	82835410	+	8.45134	NA	intron (ENSMUST00000219368.1, intron 1 of 14)	protein_coding-intron (ENSMUST00000219368.1, intron 1 of 14)	890	ENSMUST00000219368.1	ENSMUSG00000020250	ENSMUST00000219442			Txnrd1			protein_coding
e11ve16_cond1_1917	chr10	82859588	82860177	+	4.47702	NA	promoter-TSS (ENSMUST00000219442.1)	protein_coding-promoter-TSS (ENSMUST00000219442.1)	-419	ENSMUST00000219442.1	ENSMUSG00000020250	ENSMUST00000219442			Txnrd1			protein_coding
e11ve16_cond1_1918	chr10	82860690	82861132	+	4.53778	NA	TTS (ENSMUST00000218082.1)	protein_coding-TTS (ENSMUST00000218082.1)	406	ENSMUST00000219911.1	ENSMUSG00000020250	ENSMUST00000219442			Txnrd1			protein_coding
e11ve16_cond1_1919	chr10	82899155	82899416	+	4.30365	NA	Intergenic	Intergenic	12439	ENSMUST00000218724.1	ENSMUSG00000020250	ENSMUST00000219442			Txnrd1			protein_coding
e11ve16_cond1_1920	chr10	82984650	82985060	+	4.48229	NA	promoter-TSS (ENSMUST00000040110.7)	protein_coding-promoter-TSS (ENSMUST00000040110.7)	-643	ENSMUST00000040110.7	ENSMUSG00000034612	ENSMUST00000040110			Chst11			protein_coding
e11ve16_cond1_1921	chr10	82985976	82986731	+	6.49371	NA	intron (ENSMUST00000040110.7, intron 1 of 2)	protein_coding-intron (ENSMUST00000040110.7, intron 1 of 2)	855	ENSMUST00000040110.7	ENSMUSG00000034612	ENSMUST00000040110			Chst11			protein_coding
e11ve16_cond1_1922	chr10	83021040	83021486	+	6.75781	NA	intron (ENSMUST00000040110.7, intron 1 of 2)	protein_coding-intron (ENSMUST00000040110.7, intron 1 of 2)	10432	ENSMUST00000218071.1	ENSMUSG00000112084	ENSMUST00000218071			Gm10773			TEC
e11ve16_cond1_1923	chr10	83030273	83030962	+	6.56739	NA	exon (ENSMUST00000218071.1, exon 1 of 1)	TEC-exon (ENSMUST00000218071.1, exon 1 of 1)	1078	ENSMUST00000218071.1	ENSMUSG00000112084	ENSMUST00000218071			Gm10773			TEC
e11ve16_cond1_1924	chr10	83058405	83059512	+	12.6057	NA	intron (ENSMUST00000040110.7, intron 1 of 2)	protein_coding-intron (ENSMUST00000040110.7, intron 1 of 2)	-27263	ENSMUST00000218071.1	ENSMUSG00000112084	ENSMUST00000218071			Gm10773			TEC
e11ve16_cond1_1925	chr10	83087872	83088236	+	4.11745	NA	intron (ENSMUST00000040110.7, intron 1 of 2)	protein_coding-intron (ENSMUST00000040110.7, intron 1 of 2)	53984	ENSMUST00000160997.1	ENSMUSG00000090200	ENSMUST00000160997			1700025N21Rik			lncRNA
e11ve16_cond1_1926	chr10	83089162	83089511	+	6.16845	NA	intron (ENSMUST00000040110.7, intron 1 of 2)	protein_coding-intron (ENSMUST00000040110.7, intron 1 of 2)	52702	ENSMUST00000160997.1	ENSMUSG00000090200	ENSMUST00000160997			1700025N21Rik			lncRNA
e11ve16_cond1_1927	chr10	83107420	83108700	+	10.3768	NA	intron (ENSMUST00000040110.7, intron 2 of 2)	protein_coding-intron (ENSMUST00000040110.7, intron 2 of 2)	33978	ENSMUST00000160997.1	ENSMUSG00000090200	ENSMUST00000160997			1700025N21Rik			lncRNA
e11ve16_cond1_1928	chr10	83287318	83287558	+	7.80674	NA	intron (ENSMUST00000039956.5, intron 6 of 10)	protein_coding-intron (ENSMUST00000039956.5, intron 6 of 10)	16937	ENSMUST00000139329.1	ENSMUSG00000034591	ENSMUST00000039956			Slc41a2			protein_coding
e11ve16_cond1_1929	chr10	83328316	83328546	+	5.05725	NA	intron (ENSMUST00000039956.5, intron 1 of 10)	protein_coding-intron (ENSMUST00000039956.5, intron 1 of 10)	-4293	ENSMUST00000218560.1	ENSMUSG00000112577	ENSMUST00000218560			Gm47170			processed_pseudogene
e11ve16_cond1_1930	chr10	83374047	83374432	+	3.90939	NA	exon (ENSMUST00000020488.8, exon 4 of 4)	protein_coding-exon (ENSMUST00000020488.8, exon 4 of 4)	14018	ENSMUST00000020488.8	ENSMUSG00000020255	ENSMUST00000020488			D10Wsu102e			protein_coding
e11ve16_cond1_1931	chr10	83661542	83662014	+	4.97344	NA	Intergenic	Intergenic	2507	ENSMUST00000218849.1	ENSMUSG00000112072	ENSMUST00000218849			Gm47244			processed_pseudogene
e11ve16_cond1_1932	chr10	83722871	83723687	+	6.76821	NA	intron (ENSMUST00000218196.1, intron 1 of 1)	protein_coding-intron (ENSMUST00000150459.2, intron 1 of 5)	353	ENSMUST00000218196.1	ENSMUSG00000087651	ENSMUST00000218623			1500009L16Rik			protein_coding
e11ve16_cond1_1933	chr10	83852250	83852516	+	3.97222	NA	Intergenic	Intergenic	-40818	ENSMUST00000218819.1	ENSMUSG00000112077	ENSMUST00000218819			Gm47245			processed_pseudogene
e11ve16_cond1_1934	chr10	83906873	83907439	+	6.77813	NA	Intergenic	Intergenic	5304	ENSMUST00000217741.1	ENSMUSG00000112133	ENSMUST00000217741			Gm47247			processed_pseudogene
e11ve16_cond1_1935	chr10	83957607	83957913	+	6.74477	NA	Intergenic	Intergenic	47100	ENSMUST00000215772.1	ENSMUSG00000111699	ENSMUST00000215772			C230099D08Rik			lncRNA
e11ve16_cond1_1936	chr10	84020502	84021805	+	6.05446	NA	Intergenic	Intergenic	-16293	ENSMUST00000215772.1	ENSMUSG00000111699	ENSMUST00000215772			C230099D08Rik			lncRNA
e11ve16_cond1_1937	chr10	84036081	84036939	+	6.2504	NA	TTS (ENSMUST00000216477.1)	lncRNA-TTS (ENSMUST00000216477.1)	-25248	ENSMUST00000195828.1	ENSMUSG00000104317	ENSMUST00000195828			Gm37908			TEC
e11ve16_cond1_1938	chr10	84161668	84162754	+	14.3469	NA	Intergenic	Intergenic	59846	ENSMUST00000216890.1	ENSMUSG00000111062	ENSMUST00000216890			Gm47253			lncRNA
e11ve16_cond1_1939	chr10	84437870	84438165	+	10.9511	NA	intron (ENSMUST00000020220.14, intron 1 of 6)	protein_coding-intron (ENSMUST00000020220.14, intron 1 of 6)	2580	ENSMUST00000020220.14	ENSMUSG00000020032	ENSMUST00000129355			Nuak1			protein_coding
e11ve16_cond1_1940	chr10	84441366	84442145	+	6.86407	NA	intron (ENSMUST00000214135.1, intron 1 of 3)	lncRNA-intron (ENSMUST00000214135.1, intron 1 of 3)	929	ENSMUST00000214135.1	ENSMUSG00000111583	ENSMUST00000214135			Gm47962			lncRNA
e11ve16_cond1_1941	chr10	84450368	84450858	+	4.29454	NA	intron (ENSMUST00000214135.1, intron 1 of 3)	lncRNA-intron (ENSMUST00000214135.1, intron 1 of 3)	9787	ENSMUST00000214135.1	ENSMUSG00000111583	ENSMUST00000214135			Gm47962			lncRNA
e11ve16_cond1_1942	chr10	84710501	84711588	+	6.52493	NA	intron (ENSMUST00000077175.6, intron 23 of 27)	protein_coding-intron (ENSMUST00000077175.6, intron 23 of 27)	-45018	ENSMUST00000060397.12	ENSMUSG00000020037	ENSMUST00000173479			Rfx4			protein_coding
e11ve16_cond1_1943	chr10	84759292	84760851	+	5.7001	NA	intron (ENSMUST00000060397.12, intron 1 of 17)	protein_coding-intron (ENSMUST00000060397.12, intron 1 of 17)	-2167	ENSMUST00000165868.8	ENSMUSG00000020037	ENSMUST00000173479			Rfx4			protein_coding
e11ve16_cond1_1944	chr10	84836091	84836292	+	3.40161	NA	intron (ENSMUST00000166696.8, intron 2 of 14)	protein_coding-intron (ENSMUST00000060397.12, intron 5 of 17)	1445	ENSMUST00000166696.8	ENSMUSG00000020037	ENSMUST00000173479			Rfx4			protein_coding
e11ve16_cond1_1945	chr10	84859259	84859741	+	7.24328	NA	intron (ENSMUST00000166696.8, intron 6 of 14)	protein_coding-intron (ENSMUST00000020226.3, intron 5 of 9)	21352	ENSMUST00000095388.4	ENSMUSG00000020037	ENSMUST00000173479			Rfx4			protein_coding
e11ve16_cond1_1946	chr10	85044456	85045494	+	6.18789	NA	Intergenic	Intergenic	36259	ENSMUST00000214820.1	ENSMUSG00000035620	ENSMUST00000038523			Ric8b			protein_coding
e11ve16_cond1_1947	chr10	85103085	85103777	+	5.36924	NA	promoter-TSS (ENSMUST00000059383.7)	protein_coding-promoter-TSS (ENSMUST00000059383.7)	688	ENSMUST00000216771.1	ENSMUSG00000060935	ENSMUST00000216771			Tmem263			protein_coding
e11ve16_cond1_1948	chr10	85387573	85388914	+	6.16263	NA	exon (ENSMUST00000020231.9, exon 1 of 10)	protein_coding-exon (ENSMUST00000020231.9, exon 1 of 10)	1416	ENSMUST00000020231.9	ENSMUSG00000020042	ENSMUST00000145433			Btbd11			protein_coding
e11ve16_cond1_1949	chr10	85534536	85534953	+	7.79948	NA	intron (ENSMUST00000020231.9, intron 1 of 9)	protein_coding-intron (ENSMUST00000020231.9, intron 1 of 9)	-63657	ENSMUST00000105306.2	ENSMUSG00000020042	ENSMUST00000145433			Btbd11			protein_coding
e11ve16_cond1_1950	chr10	85599093	85599347	+	3.6593	NA	intron (ENSMUST00000105307.7, intron 4 of 16)	protein_coding-intron (ENSMUST00000020231.9, intron 4 of 9)	809	ENSMUST00000135235.1	ENSMUSG00000020042	ENSMUST00000145433			Btbd11			protein_coding
e11ve16_cond1_1951	chr10	85634060	85634438	+	6.40007	NA	intron (ENSMUST00000145323.1, intron 4 of 4)	protein_coding-intron (ENSMUST00000020231.9, intron 9 of 9)	4734	ENSMUST00000145323.1	ENSMUSG00000020042	ENSMUST00000145433			Btbd11			protein_coding
e11ve16_cond1_1952	chr10	85829104	85829363	+	3.51642	NA	promoter-TSS (ENSMUST00000217667.1)	protein_coding-promoter-TSS (ENSMUST00000217667.1)	-261	ENSMUST00000217667.1	ENSMUSG00000001785	ENSMUST00000219256			Pwp1			protein_coding
e11ve16_cond1_1953	chr10	85927885	85928270	+	4.63969	NA	promoter-TSS (ENSMUST00000156605.1)	protein_coding-promoter-TSS (ENSMUST00000156605.1)	396	ENSMUST00000170396.2	ENSMUSG00000085111	ENSMUST00000170396			Ascl4			protein_coding
e11ve16_cond1_1954	chr10	85928868	85929361	+	6.45075	NA	exon (ENSMUST00000170396.2, exon 1 of 1)	protein_coding-exon (ENSMUST00000170396.2, exon 1 of 1)	340	ENSMUST00000156605.1	ENSMUSG00000085111	ENSMUST00000170396			Ascl4			protein_coding
e11ve16_cond1_1955	chr10	86064311	86064778	+	4.79445	NA	intron (ENSMUST00000120638.7, intron 11 of 13)	protein_coding-intron (ENSMUST00000120638.7, intron 11 of 13)	2299	ENSMUST00000143319.1	ENSMUSG00000059602	ENSMUST00000145864			Syn3			protein_coding
e11ve16_cond1_1956	chr10	86137371	86137701	+	3.92429	NA	intron (ENSMUST00000145864.7, intron 6 of 8)	protein_coding-intron (ENSMUST00000120638.7, intron 6 of 13)	11709	ENSMUST00000132223.1	ENSMUSG00000087256	ENSMUST00000132223			Gm15990			lncRNA
e11ve16_cond1_1957	chr10	86179473	86179753	+	8.60172	NA	intron (ENSMUST00000145864.7, intron 6 of 8)	protein_coding-intron (ENSMUST00000120638.7, intron 6 of 13)	53786	ENSMUST00000132223.1	ENSMUSG00000087256	ENSMUST00000132223			Gm15990			lncRNA
e11ve16_cond1_1958	chr10	86456941	86457764	+	5.92822	NA	intron (ENSMUST00000139197.1, intron 3 of 6)	protein_coding-intron (ENSMUST00000120638.7, intron 2 of 13)	34545	ENSMUST00000123783.7	ENSMUSG00000059602	ENSMUST00000145864			Syn3			protein_coding
e11ve16_cond1_1959	chr10	86845309	86845829	+	16.7914	NA	intron (ENSMUST00000035288.16, intron 67 of 68)	protein_coding-intron (ENSMUST00000035288.16, intron 67 of 68)	6475	ENSMUST00000159445.1	ENSMUSG00000089959	ENSMUST00000159445			Gm16268			lncRNA
e11ve16_cond1_1960	chr10	87058295	87058806	+	5.37819	NA	intron (ENSMUST00000189456.6, intron 1 of 4)	protein_coding-intron (ENSMUST00000169849.2, intron 1 of 5)	504	ENSMUST00000169849.2	ENSMUSG00000047129	ENSMUST00000189775			1700113H08Rik			protein_coding
e11ve16_cond1_1961	chr10	87117424	87117818	+	7.61928	NA	intron (ENSMUST00000169849.2, intron 2 of 5)	protein_coding-intron (ENSMUST00000169849.2, intron 2 of 5)	59575	ENSMUST00000169849.2	ENSMUSG00000047129	ENSMUST00000189775			1700113H08Rik			protein_coding
e11ve16_cond1_1962	chr10	87126812	87127054	+	5.44146	NA	intron (ENSMUST00000169849.2, intron 3 of 5)	protein_coding-intron (ENSMUST00000169849.2, intron 3 of 5)	68887	ENSMUST00000169849.2	ENSMUSG00000047129	ENSMUST00000189775			1700113H08Rik			protein_coding
e11ve16_cond1_1963	chr10	87159591	87160726	+	4.28124	NA	intron (ENSMUST00000169849.2, intron 3 of 5)	protein_coding-intron (ENSMUST00000169849.2, intron 3 of 5)	-45821	ENSMUST00000189775.1	ENSMUSG00000047129	ENSMUST00000189775			1700113H08Rik			protein_coding
e11ve16_cond1_1964	chr10	87271677	87271989	+	3.38252	NA	intron (ENSMUST00000218226.1, intron 2 of 2)	lncRNA-intron (ENSMUST00000218226.1, intron 2 of 2)	-17660	ENSMUST00000220397.1	ENSMUSG00000103862	ENSMUST00000193976			Gm10764			TEC
e11ve16_cond1_1965	chr10	87272133	87272971	+	8.13445	NA	intron (ENSMUST00000218226.1, intron 2 of 2)	lncRNA-intron (ENSMUST00000218226.1, intron 2 of 2)	-16941	ENSMUST00000220397.1	ENSMUSG00000103862	ENSMUST00000193976			Gm10764			TEC
e11ve16_cond1_1966	chr10	87447508	87447782	+	5.1868	NA	Intergenic	Intergenic	46015	ENSMUST00000020243.9	ENSMUSG00000020052	ENSMUST00000020243			Ascl1			protein_coding
e11ve16_cond1_1967	chr10	87448024	87448412	+	5.20269	NA	Intergenic	Intergenic	45442	ENSMUST00000020243.9	ENSMUSG00000020052	ENSMUST00000020243			Ascl1			protein_coding
e11ve16_cond1_1968	chr10	87467755	87469953	+	6.19796	NA	Intergenic	Intergenic	24806	ENSMUST00000020243.9	ENSMUSG00000020052	ENSMUST00000020243			Ascl1			protein_coding
e11ve16_cond1_1969	chr10	87492468	87493716	+	3.83707	NA	exon (ENSMUST00000020243.9, exon 1 of 2)	protein_coding-exon (ENSMUST00000020243.9, exon 1 of 2)	568	ENSMUST00000020243.9	ENSMUSG00000020052	ENSMUST00000020243			Ascl1			protein_coding
[truncated: 16,613 more rows]
