# Supplementary material for: PI3K signaling specifies proximal-distal fate by driving a developmental gene regulatory network in SOX9+ mouse lung progenitors
Source: eLife. 2022 Aug 17;11:e67954. doi: 10.7554/eLife.67954 (PMC9427112; doi:10.7554/eLife.67954)
Supplement: Supplementary file 5. [file elife-67954-supp5.xlsx]

## Sheet: Sheet1
Supplemental File 5. Annotated E16.5 Differentially Accessible Regions
PeakID	Chr	Start	End	Strand	Peak Score	Focus Ratio/Region Size	Annotation	Detailed Annotation	Distance to TSS	Nearest PromoterID	Entrez ID	Nearest Unigene	Nearest Refseq	Nearest Ensembl	Gene Name	Gene Alias	Gene Description	Gene Type
e11ve16_cond2_22	chr1	3913664	3913945	+	4.3916	NA	intron (ENSMUST00000194643.1, intron 2 of 2)	lncRNA-intron (ENSMUST00000194643.1, intron 2 of 2)	72180	ENSMUST00000192427.1	ENSMUSG00000102343	ENSMUST00000194643			Gm37381			lncRNA
e11ve16_cond2_23	chr1	4412166	4412681	+	6.49558	NA	Intergenic	Intergenic	-3182	ENSMUST00000208660.1	ENSMUSG00000025900	ENSMUST00000027032			Rp1			protein_coding
e11ve16_cond2_24	chr1	4571678	4571888	+	3.43486	NA	Intergenic	Intergenic	14469	ENSMUST00000195771.1	ENSMUSG00000104328	ENSMUST00000195771			Gm37323			lncRNA
e11ve16_cond2_25	chr1	4622326	4623553	+	11.8239	NA	Intergenic	Intergenic	12468	ENSMUST00000192738.1	ENSMUSG00000102735	ENSMUST00000192738			Gm7369			processed_pseudogene
e11ve16_cond2_26	chr1	4644609	4645548	+	5.44099	NA	Intergenic	Intergenic	34607	ENSMUST00000192738.1	ENSMUSG00000102735	ENSMUST00000192738			Gm7369			processed_pseudogene
e11ve16_cond2_27	chr1	4671328	4672172	+	7.58101	NA	Intergenic	Intergenic	17653	ENSMUST00000182774.1	ENSMUSG00000098104	ENSMUST00000182774			Gm6085			processed_pseudogene
e11ve16_cond2_28	chr1	4722312	4722918	+	7.90336	NA	TTS (ENSMUST00000157375.1)	snRNA-TTS (ENSMUST00000157375.1)	764	ENSMUST00000157375.1	ENSMUSG00000088000	ENSMUST00000157375			Gm25493			snRNA
e11ve16_cond2_29	chr1	4739490	4739731	+	3.66263	NA	Intergenic	Intergenic	-3934	ENSMUST00000195671.1	ENSMUSG00000103265	ENSMUST00000195671			Gm2053			processed_pseudogene
e11ve16_cond2_30	chr1	4807602	4808165	+	12.0649	NA	promoter-TSS (ENSMUST00000027036.10)	protein_coding-promoter-TSS (ENSMUST00000027036.10)	-9	ENSMUST00000155020.1	ENSMUSG00000104217	ENSMUST00000155020			Gm37988			protein_coding
e11ve16_cond2_31	chr1	4857396	4858087	+	10.12	NA	promoter-TSS (ENSMUST00000081551.13)	protein_coding-promoter-TSS (ENSMUST00000081551.13)	-73	ENSMUST00000081551.13	ENSMUSG00000033813	ENSMUST00000081551			Tcea1			protein_coding
e11ve16_cond2_32	chr1	5082866	5083588	+	5.87837	NA	promoter-TSS (ENSMUST00000192029.5)	protein_coding-promoter-TSS (ENSMUST00000192029.5)	63	ENSMUST00000192142.1	ENSMUSG00000033793	ENSMUST00000044369			Atp6v1h			protein_coding
e11ve16_cond2_33	chr1	5504783	5505836	+	6.25887	NA	Intergenic	Intergenic	-83157	ENSMUST00000192685.1	ENSMUSG00000025905	ENSMUST00000027038			Oprk1			protein_coding
e11ve16_cond2_34	chr1	6213507	6213913	+	5.0202	NA	promoter-TSS (ENSMUST00000027040.12)	protein_coding-promoter-TSS (ENSMUST00000027040.12)	880	ENSMUST00000159618.1	ENSMUSG00000090031	ENSMUST00000097832			4732440D04Rik			lncRNA
e11ve16_cond2_35	chr1	6214089	6215098	+	11.0016	NA	promoter-TSS (ENSMUST00000027040.12)	protein_coding-promoter-TSS (ENSMUST00000027040.12)	-3	ENSMUST00000159618.1	ENSMUSG00000090031	ENSMUST00000097832			4732440D04Rik			lncRNA
e11ve16_cond2_36	chr1	6251074	6251797	+	10.3897	NA	TTS (ENSMUST00000159206.1)	protein_coding-TTS (ENSMUST00000159206.1)	1340	ENSMUST00000159661.7	ENSMUSG00000025907	ENSMUST00000159656			Rb1cc1			protein_coding
e11ve16_cond2_37	chr1	6866454	6867701	+	11.9067	NA	Intergenic	Intergenic	-2926	ENSMUST00000195780.2	ENSMUSG00000103329	ENSMUST00000195780			Gm42492			TEC
e11ve16_cond2_38	chr1	6939821	6940166	+	5.56468	NA	Intergenic	Intergenic	10234	ENSMUST00000191703.1	ENSMUSG00000103282	ENSMUST00000191703			Gm37275			processed_pseudogene
e11ve16_cond2_39	chr1	7088507	7089352	+	17.9705	NA	promoter-TSS (ENSMUST00000061280.16)	protein_coding-promoter-TSS (ENSMUST00000061280.16)	-1	ENSMUST00000182114.7	ENSMUSG00000051285	ENSMUST00000182892			Pcmtd1			protein_coding
e11ve16_cond2_40	chr1	7206326	7207016	+	6.4574	NA	Intergenic	Intergenic	-16752	ENSMUST00000195269.1	ENSMUSG00000103709	ENSMUST00000195269			Nras-ps2			processed_pseudogene
e11ve16_cond2_41	chr1	7397640	7398499	+	15.7954	NA	promoter-TSS (ENSMUST00000181554.1)	lncRNA-promoter-TSS (ENSMUST00000181554.1)	-200	ENSMUST00000193732.1	ENSMUSG00000097797	ENSMUST00000181554			Gm26901			lncRNA
e11ve16_cond2_42	chr1	7498660	7498891	+	3.473	NA	intron (ENSMUST00000194886.1, intron 1 of 2)	lncRNA-intron (ENSMUST00000194886.1, intron 1 of 2)	807	ENSMUST00000194886.1	ENSMUSG00000103067	ENSMUST00000194886			Gm30414			lncRNA
e11ve16_cond2_43	chr1	9237190	9237431	+	3.59994	NA	intron (ENSMUST00000140295.7, intron 1 of 20)	protein_coding-intron (ENSMUST00000126083.1, intron 2 of 4)	21824	ENSMUST00000195333.1	ENSMUSG00000103819	ENSMUST00000195333			Gm38008			processed_pseudogene
e11ve16_cond2_44	chr1	9564457	9564874	+	3.87033	NA	intron (ENSMUST00000190654.1, intron 12 of 14)	protein_coding-intron (ENSMUST00000027044.14, intron 11 of 12)	-9883	ENSMUST00000121942.1	ENSMUSG00000081441	ENSMUST00000121942			Gm6161			processed_pseudogene
e11ve16_cond2_45	chr1	9700246	9700824	+	6.63474	NA	promoter-TSS (ENSMUST00000088658.10)	protein_coding-promoter-TSS (ENSMUST00000088658.10)	-326	ENSMUST00000088658.10	ENSMUSG00000025912	ENSMUST00000088658			Mybl1			protein_coding
e11ve16_cond2_46	chr1	9747951	9748577	+	5.24292	NA	promoter-TSS (ENSMUST00000189431.1)	lncRNA-promoter-TSS (ENSMUST00000189431.1)	118	ENSMUST00000057438.6	ENSMUSG00000045210	ENSMUST00000057438			Vcpip1			protein_coding
e11ve16_cond2_47	chr1	9772915	9773357	+	8.44298	NA	intron (ENSMUST00000181821.7, intron 2 of 3)	lncRNA-intron (ENSMUST00000181358.7, intron 2 of 6)	-10642	ENSMUST00000189322.1	ENSMUSG00000097893	ENSMUST00000191287			1700034P13Rik			lncRNA
e11ve16_cond2_48	chr1	10039732	10040213	+	12.1978	NA	promoter-TSS (ENSMUST00000155974.7)	protein_coding-intron (ENSMUST00000190063.6, intron 1 of 3)	149	ENSMUST00000134716.1	ENSMUSG00000056763	ENSMUST00000136283			Cspp1			protein_coding
e11ve16_cond2_49	chr1	10232872	10233418	+	6.47387	NA	promoter-TSS (ENSMUST00000088615.10)	protein_coding-promoter-TSS (ENSMUST00000088615.10)	-475	ENSMUST00000088615.10	ENSMUSG00000067851	ENSMUST00000142497			Arfgef1			protein_coding
e11ve16_cond2_50	chr1	10256680	10257044	+	4.00255	NA	Intergenic	Intergenic	-24192	ENSMUST00000088615.10	ENSMUSG00000067851	ENSMUST00000142497			Arfgef1			protein_coding
e11ve16_cond2_51	chr1	10285227	10285624	+	4.8021	NA	Intergenic	Intergenic	-52755	ENSMUST00000088615.10	ENSMUSG00000067851	ENSMUST00000142497			Arfgef1			protein_coding
e11ve16_cond2_52	chr1	10681021	10681649	+	7.2207	NA	intron (ENSMUST00000153695.7, intron 1 of 9)	protein_coding-intron (ENSMUST00000035577.6, intron 1 of 10)	-13788	ENSMUST00000119252.1	ENSMUSG00000081417	ENSMUST00000119252			Gm15603			processed_pseudogene
e11ve16_cond2_53	chr1	10743365	10744382	+	15.8919	NA	Intergenic	Intergenic	-23928	ENSMUST00000035577.6	ENSMUSG00000042501	ENSMUST00000035577			Cpa6			protein_coding
e11ve16_cond2_54	chr1	10932536	10933427	+	9.61054	NA	Intergenic	Intergenic	11311	ENSMUST00000157960.1	ENSMUSG00000088585	ENSMUST00000157960			Gm22963			snoRNA
e11ve16_cond2_55	chr1	10993578	10993864	+	4.13759	NA	exon (ENSMUST00000027056.11, exon 1 of 40)	protein_coding-exon (ENSMUST00000027056.11, exon 1 of 40)	203	ENSMUST00000190935.1	ENSMUSG00000048960	ENSMUST00000187694			Prex2			protein_coding
e11ve16_cond2_56	chr1	12000092	12001111	+	5.23385	NA	Intergenic	Intergenic	-120359	ENSMUST00000187748.1	ENSMUSG00000101610	ENSMUST00000187748			Gm7560			processed_pseudogene
e11ve16_cond2_57	chr1	12122638	12122882	+	5.73332	NA	TTS (ENSMUST00000187748.1)	processed_pseudogene-TTS (ENSMUST00000187748.1)	1800	ENSMUST00000187748.1	ENSMUSG00000101610	ENSMUST00000187748			Gm7560			processed_pseudogene
e11ve16_cond2_58	chr1	12947077	12948036	+	17.5495	NA	intron (ENSMUST00000188454.6, intron 2 of 9)	protein_coding-intron (ENSMUST00000115402.7, intron 1 of 7)	-22513	ENSMUST00000133201.2	ENSMUSG00000025938	ENSMUST00000188454			Slco5a1			protein_coding
e11ve16_cond2_59	chr1	13244131	13245052	+	4.65451	NA	intron (ENSMUST00000145280.1, intron 1 of 3)	protein_coding-intron (ENSMUST00000139970.7, intron 2 of 6)	-8157	ENSMUST00000195811.1	ENSMUSG00000103495	ENSMUST00000195811			Gm37409			TEC
e11ve16_cond2_60	chr1	13266518	13266860	+	4.1832	NA	intron (ENSMUST00000145280.1, intron 1 of 3)	protein_coding-intron (ENSMUST00000006037.12, intron 2 of 22)	4491	ENSMUST00000183805.1	ENSMUSG00000099183	ENSMUST00000183805			Gm27881			miRNA
e11ve16_cond2_61	chr1	13372425	13373082	+	8.16518	NA	promoter-TSS (ENSMUST00000081713.10)	protein_coding-promoter-TSS (ENSMUST00000081713.10)	-314	ENSMUST00000081713.10	ENSMUSG00000005886	ENSMUST00000139970			Ncoa2			protein_coding
e11ve16_cond2_62	chr1	13589259	13589541	+	3.66125	NA	intron (ENSMUST00000188377.1, intron 1 of 3)	protein_coding-intron (ENSMUST00000027068.10, intron 1 of 10)	475	ENSMUST00000188377.1	ENSMUSG00000025935	ENSMUST00000027068			Tram1			protein_coding
e11ve16_cond2_63	chr1	13608373	13608903	+	7.3965	NA	Intergenic	Intergenic	-18728	ENSMUST00000027068.10	ENSMUSG00000025935	ENSMUST00000027068			Tram1			protein_coding
e11ve16_cond2_64	chr1	13643179	13643404	+	5.22371	NA	promoter-TSS (ENSMUST00000194537.1)	TEC-promoter-TSS (ENSMUST00000194537.1)	-543	ENSMUST00000194537.1	ENSMUSG00000102982	ENSMUST00000194537			Gm38319			TEC
e11ve16_cond2_65	chr1	13659116	13659680	+	4.23576	NA	intron (ENSMUST00000027071.6, intron 1 of 6)	protein_coding-intron (ENSMUST00000027071.6, intron 1 of 6)	1148	ENSMUST00000027071.6	ENSMUSG00000025937	ENSMUST00000027071			Lactb2			protein_coding
e11ve16_cond2_66	chr1	13660009	13660868	+	4.37534	NA	exon (ENSMUST00000027071.6, exon 1 of 7)	protein_coding-exon (ENSMUST00000027071.6, exon 1 of 7)	108	ENSMUST00000027071.6	ENSMUSG00000025937	ENSMUST00000027071			Lactb2			protein_coding
e11ve16_cond2_67	chr1	13782610	13782897	+	5.09651	NA	Intergenic	Intergenic	4126	ENSMUST00000180415.1	ENSMUSG00000097711	ENSMUST00000180415			Gm5523			processed_pseudogene
e11ve16_cond2_68	chr1	14001087	14002204	+	7.74096	NA	Intergenic	Intergenic	69267	ENSMUST00000158733.1	ENSMUSG00000089358	ENSMUST00000158733			Gm25491			misc_RNA
e11ve16_cond2_69	chr1	14139514	14139957	+	7.06809	NA	Intergenic	Intergenic	-26916	ENSMUST00000193148.1	ENSMUSG00000104209	ENSMUST00000193148			Gm37400			TEC
e11ve16_cond2_70	chr1	14150932	14151291	+	4.08264	NA	Intergenic	Intergenic	-31467	ENSMUST00000179783.1	ENSMUSG00000095853	ENSMUST00000179783			Gm22616			miRNA
e11ve16_cond2_71	chr1	14202325	14202788	+	11.2423	NA	intron (ENSMUST00000168081.8, intron 12 of 17)	protein_coding-intron (ENSMUST00000027066.12, intron 12 of 17)	19978	ENSMUST00000179783.1	ENSMUSG00000095853	ENSMUST00000179783			Gm22616			miRNA
e11ve16_cond2_72	chr1	14223002	14224058	+	12.775	NA	intron (ENSMUST00000027066.12, intron 11 of 17)	protein_coding-intron (ENSMUST00000027066.12, intron 11 of 17)	7962	ENSMUST00000189526.1	ENSMUSG00000025932	ENSMUST00000027066			Eya1			protein_coding
e11ve16_cond2_73	chr1	14273721	14274510	+	7.90267	NA	exon (ENSMUST00000027066.12, exon 6 of 18)	protein_coding-exon (ENSMUST00000027066.12, exon 6 of 18)	-18125	ENSMUST00000193605.1	ENSMUSG00000102588	ENSMUST00000193605			Gm37444			TEC
e11ve16_cond2_74	chr1	14292181	14293544	+	6.81798	NA	intron (ENSMUST00000188857.6, intron 1 of 6)	protein_coding-intron (ENSMUST00000027066.12, intron 3 of 17)	11708	ENSMUST00000190337.6	ENSMUSG00000025932	ENSMUST00000027066			Eya1			protein_coding
e11ve16_cond2_75	chr1	14293691	14293924	+	8.71719	NA	intron (ENSMUST00000188857.6, intron 1 of 6)	protein_coding-intron (ENSMUST00000027066.12, intron 3 of 17)	10763	ENSMUST00000190337.6	ENSMUSG00000025932	ENSMUST00000027066			Eya1			protein_coding
e11ve16_cond2_76	chr1	14310110	14310593	+	4.70746	NA	promoter-TSS (ENSMUST00000027066.12)	protein_coding-promoter-TSS (ENSMUST00000027066.12)	-116	ENSMUST00000168081.8	ENSMUSG00000025932	ENSMUST00000027066			Eya1			protein_coding
e11ve16_cond2_77	chr1	14467191	14467563	+	7.04368	NA	Intergenic	Intergenic	-157142	ENSMUST00000168081.8	ENSMUSG00000025932	ENSMUST00000027066			Eya1			protein_coding
e11ve16_cond2_78	chr1	14709317	14710715	+	20.6935	NA	Intergenic	Intergenic	-42921	ENSMUST00000187401.1	ENSMUSG00000054493	ENSMUST00000067599			Gm9947			lncRNA
e11ve16_cond2_79	chr1	14795231	14795912	+	6.99859	NA	Intergenic	Intergenic	6926	ENSMUST00000194866.1	ENSMUSG00000103492	ENSMUST00000194866			Gm37412			TEC
e11ve16_cond2_80	chr1	15143629	15144482	+	8.1925	NA	Intergenic	Intergenic	-124896	ENSMUST00000157534.1	ENSMUSG00000088159	ENSMUST00000157534			Gm26345			snoRNA
e11ve16_cond2_81	chr1	15286677	15286952	+	5.4135	NA	promoter-TSS (ENSMUST00000175681.2)	protein_coding-promoter-TSS (ENSMUST00000175681.2)	-440	ENSMUST00000175681.2	ENSMUSG00000092083	ENSMUST00000170146			Kcnb2			protein_coding
e11ve16_cond2_82	chr1	15558431	15559315	+	12.1088	NA	TTS (ENSMUST00000194564.1)	TEC-TTS (ENSMUST00000194564.1)	2624	ENSMUST00000194564.1	ENSMUSG00000104149	ENSMUST00000194564			Gm37138			TEC
e11ve16_cond2_83	chr1	15805394	15806313	+	4.27204	NA	exon (ENSMUST00000027057.7, exon 1 of 9)	protein_coding-exon (ENSMUST00000027057.7, exon 1 of 9)	189	ENSMUST00000027057.7	ENSMUSG00000025925	ENSMUST00000188684			Terf1			protein_coding
e11ve16_cond2_84	chr1	15877069	15877426	+	20.675	NA	intron (ENSMUST00000040695.4, intron 2 of 4)	protein_coding-intron (ENSMUST00000040695.4, intron 2 of 4)	-2283	ENSMUST00000158318.1	ENSMUSG00000088943	ENSMUST00000158318			Gm23259			misc_RNA
e11ve16_cond2_85	chr1	16104694	16106108	+	6.19887	NA	promoter-TSS (ENSMUST00000027053.7)	protein_coding-promoter-TSS (ENSMUST00000027053.7)	-373	ENSMUST00000027053.7	ENSMUSG00000025921	ENSMUST00000152626			Rdh10			protein_coding
e11ve16_cond2_86	chr1	16111858	16112216	+	11.2769	NA	intron (ENSMUST00000027053.7, intron 2 of 5)	protein_coding-intron (ENSMUST00000027053.7, intron 2 of 5)	6263	ENSMUST00000027053.7	ENSMUSG00000025921	ENSMUST00000152626			Rdh10			protein_coding
e11ve16_cond2_87	chr1	16152985	16153686	+	9.07876	NA	Intergenic	Intergenic	22833	ENSMUST00000152626.1	ENSMUSG00000025921	ENSMUST00000152626			Rdh10			protein_coding
e11ve16_cond2_88	chr1	16228273	16228653	+	6.32269	NA	promoter-TSS (ENSMUST00000186343.1)	lncRNA-promoter-TSS (ENSMUST00000186343.1)	-43	ENSMUST00000186343.1	ENSMUSG00000100868	ENSMUST00000186343			Gm28095			lncRNA
e11ve16_cond2_89	chr1	16408280	16408721	+	7.41308	NA	intron (ENSMUST00000151888.7, intron 3 of 3)	protein_coding-intron (ENSMUST00000027052.12, intron 4 of 12)	-33105	ENSMUST00000115360.7	ENSMUSG00000025920	ENSMUST00000149320			Stau2			protein_coding
e11ve16_cond2_90	chr1	16618847	16619346	+	3.45833	NA	exon (ENSMUST00000195710.1, exon 1 of 1)	TEC-exon (ENSMUST00000195710.1, exon 1 of 1)	163	ENSMUST00000133639.1	ENSMUSG00000025939	ENSMUST00000182554			Ube2w			protein_coding
e11ve16_cond2_91	chr1	16656830	16657544	+	5.49728	NA	promoter-TSS (ENSMUST00000115352.9)	protein_coding-promoter-TSS (ENSMUST00000115352.9)	-145	ENSMUST00000115352.9	ENSMUSG00000079658	ENSMUST00000186948			Eloc			protein_coding
e11ve16_cond2_92	chr1	16824317	16824573	+	4.61278	NA	Intergenic	Intergenic	-54307	ENSMUST00000071842.9	ENSMUSG00000091020	ENSMUST00000071842			Gm5828			processed_pseudogene
e11ve16_cond2_93	chr1	17097400	17098109	+	9.32525	NA	exon (ENSMUST00000038382.4, exon 1 of 5)	protein_coding-exon (ENSMUST00000038382.4, exon 1 of 5)	135	ENSMUST00000038382.4	ENSMUSG00000042686	ENSMUST00000186024			Jph1			protein_coding
e11ve16_cond2_94	chr1	17123202	17123584	+	3.32639	NA	Intergenic	Intergenic	-1354	ENSMUST00000188872.1	ENSMUSG00000100110	ENSMUST00000188872			Gm28783			lncRNA
e11ve16_cond2_95	chr1	19849650	19850497	+	15.5272	NA	Intergenic	Intergenic	215475	ENSMUST00000194347.1	ENSMUSG00000104095	ENSMUST00000194347			Gm37315			TEC
e11ve16_cond2_96	chr1	20653870	20654113	+	3.71204	NA	Intergenic	Intergenic	-15891	ENSMUST00000227082.1	ENSMUSG00000099906	ENSMUST00000185494			Gm28653			lncRNA
e11ve16_cond2_97	chr1	20863499	20864278	+	5.34547	NA	Intergenic	Intergenic	-21222	ENSMUST00000158233.1	ENSMUSG00000088858	ENSMUST00000158233			Gm24723			snoRNA
e11ve16_cond2_98	chr1	20879088	20879832	+	6.58823	NA	Intergenic	Intergenic	11013	ENSMUST00000181654.1	ENSMUSG00000097934	ENSMUST00000181654			6720483E21Rik			lncRNA
e11ve16_cond2_99	chr1	20890593	20890886	+	5.62306	NA	promoter-TSS (ENSMUST00000181654.1)	lncRNA-promoter-TSS (ENSMUST00000181654.1)	133	ENSMUST00000189400.6	ENSMUSG00000025931	ENSMUST00000189400			Paqr8			protein_coding
e11ve16_cond2_100	chr1	21002425	21003305	+	43.2885	NA	intron (ENSMUST00000037998.5, intron 10 of 10)	protein_coding-intron (ENSMUST00000037998.5, intron 10 of 10)	40791	ENSMUST00000187210.1	ENSMUSG00000041779	ENSMUST00000037998			Tram2			protein_coding
e11ve16_cond2_101	chr1	21010072	21010302	+	3.62156	NA	intron (ENSMUST00000037998.5, intron 4 of 10)	protein_coding-intron (ENSMUST00000037998.5, intron 4 of 10)	33469	ENSMUST00000187210.1	ENSMUSG00000041779	ENSMUST00000037998			Tram2			protein_coding
e11ve16_cond2_102	chr1	21089472	21090338	+	9.99065	NA	Intergenic	Intergenic	9791	ENSMUST00000186612.1	ENSMUSG00000099971	ENSMUST00000186612			Gm28287			lncRNA
e11ve16_cond2_103	chr1	21252881	21253212	+	3.83808	NA	promoter-TSS (ENSMUST00000190711.1)	protein_coding-promoter-TSS (ENSMUST00000190711.1)	-475	ENSMUST00000190711.1	ENSMUSG00000025934	ENSMUST00000121676			Gsta3			protein_coding
e11ve16_cond2_104	chr1	21271627	21271927	+	4.19049	NA	promoter-TSS (ENSMUST00000178379.2)	unprocessed_pseudogene-promoter-TSS (ENSMUST00000178379.2)	-184	ENSMUST00000185842.1	ENSMUSG00000099343	ENSMUST00000185842			Gm28836			lncRNA
e11ve16_cond2_105	chr1	21287922	21288513	+	7.59472	NA	exon (ENSMUST00000082032.12, exon 5 of 6)	transcribed_unprocessed_pseudogene-exon (ENSMUST00000082032.12, exon 5 of 6)	9910	ENSMUST00000178869.7	ENSMUSG00000025936	ENSMUST00000178869			Gm4956			transcribed_unprocessed_pseudogene
e11ve16_cond2_106	chr1	21344529	21345005	+	4.6972	NA	Intergenic	Intergenic	-4874	ENSMUST00000088407.3	ENSMUSG00000067750	ENSMUST00000088407			Khdc1a			protein_coding
e11ve16_cond2_107	chr1	21506267	21507016	+	6.19436	NA	intron (ENSMUST00000174183.7, intron 2 of 11)	protein_coding-intron (ENSMUST00000029667.12, intron 3 of 13)	6415	ENSMUST00000119064.1	ENSMUSG00000082935	ENSMUST00000119064			Gm7658			processed_pseudogene
e11ve16_cond2_108	chr1	21690375	21691260	+	6.24126	NA	intron (ENSMUST00000115299.7, intron 1 of 8)	protein_coding-intron (ENSMUST00000029667.12, intron 1 of 13)	149697	ENSMUST00000194737.1	ENSMUSG00000103748	ENSMUST00000194737			Gm38243			TEC
e11ve16_cond2_109	chr1	21829679	21830528	+	15.0364	NA	intron (ENSMUST00000115299.7, intron 1 of 8)	protein_coding-intron (ENSMUST00000029667.12, intron 1 of 13)	10411	ENSMUST00000194737.1	ENSMUSG00000103748	ENSMUST00000194737			Gm38243			TEC
e11ve16_cond2_110	chr1	21890574	21891102	+	4.84444	NA	intron (ENSMUST00000115299.7, intron 1 of 8)	protein_coding-intron (ENSMUST00000029667.12, intron 1 of 13)	-34936	ENSMUST00000134505.1	ENSMUSG00000028033	ENSMUST00000173404			Kcnq5			protein_coding
e11ve16_cond2_111	chr1	22763362	22763564	+	3.68843	NA	intron (ENSMUST00000115273.8, intron 1 of 33)	protein_coding-intron (ENSMUST00000081544.12, intron 1 of 31)	22699	ENSMUST00000180414.1	ENSMUSG00000097642	ENSMUST00000180414			Gm26866			processed_pseudogene
e11ve16_cond2_112	chr1	23045135	23045431	+	13.1265	NA	Intergenic	Intergenic	56970	ENSMUST00000073179.5	ENSMUSG00000073730	ENSMUST00000073179			Ppp1r14bl			protein_coding
e11ve16_cond2_113	chr1	23177254	23177503	+	4.84565	NA	intron (ENSMUST00000191045.1, intron 2 of 3)	lncRNA-intron (ENSMUST00000191045.1, intron 2 of 3)	58295	ENSMUST00000191045.1	ENSMUSG00000101227	ENSMUST00000191045			Gm29506			lncRNA
e11ve16_cond2_114	chr1	23189748	23191021	+	31.2262	NA	intron (ENSMUST00000191045.1, intron 2 of 3)	lncRNA-intron (ENSMUST00000191045.1, intron 2 of 3)	45289	ENSMUST00000191045.1	ENSMUSG00000101227	ENSMUST00000191045			Gm29506			lncRNA
e11ve16_cond2_115	chr1	23200369	23200655	+	3.32937	NA	intron (ENSMUST00000191045.1, intron 2 of 3)	lncRNA-intron (ENSMUST00000191045.1, intron 2 of 3)	35161	ENSMUST00000191045.1	ENSMUSG00000101227	ENSMUST00000191045			Gm29506			lncRNA
e11ve16_cond2_116	chr1	23202675	23203440	+	14.6191	NA	intron (ENSMUST00000191045.1, intron 2 of 3)	lncRNA-intron (ENSMUST00000191045.1, intron 2 of 3)	32616	ENSMUST00000191045.1	ENSMUSG00000101227	ENSMUST00000191045			Gm29506			lncRNA
e11ve16_cond2_117	chr1	23228265	23229002	+	11.2121	NA	intron (ENSMUST00000191045.1, intron 1 of 3)	lncRNA-intron (ENSMUST00000191045.1, intron 1 of 3)	7040	ENSMUST00000191045.1	ENSMUSG00000101227	ENSMUST00000191045			Gm29506			lncRNA
e11ve16_cond2_118	chr1	23255969	23256665	+	6.08157	NA	promoter-TSS (ENSMUST00000193885.1)	TEC-promoter-TSS (ENSMUST00000193885.1)	89	ENSMUST00000195365.1	ENSMUSG00000102766	ENSMUST00000195365			Gm6420			TEC
e11ve16_cond2_119	chr1	23265619	23266050	+	5.14047	NA	Intergenic	Intergenic	-6435	ENSMUST00000083471.3	ENSMUSG00000065405	ENSMUST00000083471			Mir30a			miRNA
e11ve16_cond2_120	chr1	23271054	23271654	+	7.40019	NA	promoter-TSS (ENSMUST00000083471.3)	miRNA-promoter-TSS (ENSMUST00000083471.3)	-915	ENSMUST00000083471.3	ENSMUSG00000065405	ENSMUST00000083471			Mir30a			miRNA
e11ve16_cond2_121	chr1	23396141	23396870	+	5.38816	NA	intron (ENSMUST00000189537.1, intron 1 of 1)	protein_coding-intron (ENSMUST00000188677.1, intron 1 of 7)	1036	ENSMUST00000188677.1	ENSMUSG00000026158	ENSMUST00000189537			Ogfrl1			protein_coding
e11ve16_cond2_122	chr1	23480508	23481251	+	15.3342	NA	TTS (ENSMUST00000180769.1)	processed_pseudogene-TTS (ENSMUST00000180769.1)	1340	ENSMUST00000180769.1	ENSMUSG00000097920	ENSMUST00000180769			Gm7784			processed_pseudogene
e11ve16_cond2_123	chr1	23607015	23607697	+	12.3854	NA	Intergenic	Intergenic	32769	ENSMUST00000191140.1	ENSMUSG00000099503	ENSMUST00000191140			Gm28822			lncRNA
e11ve16_cond2_124	chr1	24099897	24100442	+	3.97422	NA	promoter-TSS (ENSMUST00000186999.6)	protein_coding-promoter-TSS (ENSMUST00000186999.6)	13	ENSMUST00000187369.6	ENSMUSG00000026153	ENSMUST00000186999			Fam135a			protein_coding
e11ve16_cond2_125	chr1	24186836	24187464	+	18.8509	NA	intron (ENSMUST00000054588.14, intron 5 of 37)	protein_coding-intron (ENSMUST00000054588.14, intron 5 of 37)	-8037	ENSMUST00000088349.2	ENSMUSG00000026147	ENSMUST00000147902			Col9a1			protein_coding
e11ve16_cond2_126	chr1	24378371	24378680	+	4.92645	NA	intron (ENSMUST00000051344.5, intron 15 of 47)	protein_coding-intron (ENSMUST00000051344.5, intron 15 of 47)	74220	ENSMUST00000144297.1	ENSMUSG00000026141	ENSMUST00000115244			Col19a1			protein_coding
e11ve16_cond2_127	chr1	24611733	24616009	+	167455	NA	promoter-TSS (ENSMUST00000188299.1)	unprocessed_pseudogene-promoter-TSS (ENSMUST00000188299.1)	100	ENSMUST00000190277.1	ENSMUSG00000101111	ENSMUST00000190277			Gm28437			unprocessed_pseudogene
e11ve16_cond2_128	chr1	24677891	24679057	+	9.11461	NA	promoter-TSS (ENSMUST00000095062.9)	protein_coding-promoter-TSS (ENSMUST00000095062.9)	-156	ENSMUST00000191471.6	ENSMUSG00000073725	ENSMUST00000186096			Lmbrd1			protein_coding
e11ve16_cond2_129	chr1	25042071	25042410	+	5.34931	NA	Intergenic	Intergenic	-15008	ENSMUST00000185379.1	ENSMUSG00000099392	ENSMUST00000185379			Gm29414			lncRNA
e11ve16_cond2_130	chr1	25057356	25058330	+	30.1991	NA	Intergenic	Intergenic	-30611	ENSMUST00000185379.1	ENSMUSG00000099392	ENSMUST00000185379			Gm29414			lncRNA
e11ve16_cond2_131	chr1	25542739	25543187	+	4.5678	NA	intron (ENSMUST00000151309.7, intron 5 of 30)	protein_coding-intron (ENSMUST00000041838.6, intron 4 of 29)	68221	ENSMUST00000195543.1	ENSMUSG00000103889	ENSMUST00000195543			Gm37011			TEC
e11ve16_cond2_132	chr1	26686939	26688264	+	45.8162	NA	promoter-TSS (ENSMUST00000097801.3)	protein_coding-promoter-TSS (ENSMUST00000097801.3)	-141	ENSMUST00000097801.3	ENSMUSG00000073722	ENSMUST00000097801			4931408C20Rik			protein_coding
e11ve16_cond2_133	chr1	30718661	30718865	+	7.67576	NA	exon (ENSMUST00000065469.2, exon 2 of 2)	lncRNA-exon (ENSMUST00000065469.2, exon 2 of 2)	1199	ENSMUST00000065469.2	ENSMUSG00000053185	ENSMUST00000065469			Gm9898			lncRNA
e11ve16_cond2_134	chr1	30873598	30874015	+	8.24153	NA	promoter-TSS (ENSMUST00000185604.1)	protein_coding-promoter-TSS (ENSMUST00000185604.1)	-2	ENSMUST00000191064.6	ENSMUSG00000048874	ENSMUST00000191064			Phf3			protein_coding
e11ve16_cond2_135	chr1	30910128	30910403	+	4.46132	NA	Intergenic	Intergenic	34039	ENSMUST00000130934.1	ENSMUSG00000026064	ENSMUST00000232841			Ptp4a1			protein_coding
e11ve16_cond2_136	chr1	30949063	30950152	+	6.98141	NA	promoter-TSS (ENSMUST00000232841.1)	protein_coding-promoter-TSS (ENSMUST00000232841.1)	84	ENSMUST00000238874.1	ENSMUSG00000117310	ENSMUST00000238874			Ptp4a1			protein_coding
e11ve16_cond2_137	chr1	31033701	31034834	+	6.10986	NA	intron (ENSMUST00000187892.7, intron 4 of 5)	protein_coding-intron (ENSMUST00000187892.7, intron 4 of 5)	-7652	ENSMUST00000191364.1	ENSMUSG00000100237	ENSMUST00000191364			Gm28644			lncRNA
e11ve16_cond2_138	chr1	31050271	31051903	+	9.87546	NA	intron (ENSMUST00000233331.1, intron 2 of 4)	protein_coding-intron (ENSMUST00000187892.7, intron 4 of 5)	9168	ENSMUST00000191364.1	ENSMUSG00000100237	ENSMUST00000191364			Gm28644			lncRNA
e11ve16_cond2_139	chr1	31102503	31103562	+	9.51491	NA	intron (ENSMUST00000187892.7, intron 3 of 5)	protein_coding-intron (ENSMUST00000187892.7, intron 3 of 5)	-6578	ENSMUST00000188605.1	ENSMUSG00000086727	ENSMUST00000152491			4931428L18Rik			protein_coding
e11ve16_cond2_140	chr1	33488170	33489060	+	9.09972	NA	intron (ENSMUST00000027312.10, intron 10 of 13)	protein_coding-intron (ENSMUST00000027312.10, intron 10 of 13)	6514	ENSMUST00000185489.1	ENSMUSG00000101682	ENSMUST00000185489			Gm29228			processed_pseudogene
e11ve16_cond2_141	chr1	33583947	33584457	+	7.48784	NA	intron (ENSMUST00000027312.10, intron 7 of 13)	protein_coding-intron (ENSMUST00000027312.10, intron 7 of 13)	32630	ENSMUST00000192891.1	ENSMUSG00000102714	ENSMUST00000192891			Gm37618			TEC
e11ve16_cond2_142	chr1	33734134	33734511	+	12.6929	NA	promoter-TSS (ENSMUST00000150593.7)	protein_coding-promoter-TSS (ENSMUST00000150593.7)	-206	ENSMUST00000150593.7	ENSMUSG00000004768	ENSMUST00000150593			Rab23			protein_coding
e11ve16_cond2_143	chr1	33963099	33963640	+	7.36253	NA	TTS (ENSMUST00000190740.1)	processed_pseudogene-TTS (ENSMUST00000190740.1)	316	ENSMUST00000190740.1	ENSMUSG00000099382	ENSMUST00000190740			Gm28631			processed_pseudogene
e11ve16_cond2_144	chr1	33967324	33967614	+	7.14618	NA	intron (ENSMUST00000183034.4, intron 2 of 102)	protein_coding-intron (ENSMUST00000183034.4, intron 2 of 102)	-3784	ENSMUST00000190740.1	ENSMUSG00000099382	ENSMUST00000190740			Gm28631			processed_pseudogene
e11ve16_cond2_145	chr1	34218770	34219042	+	4.29507	NA	intron (ENSMUST00000185269.6, intron 38 of 83)	protein_coding-intron (ENSMUST00000097785.9, intron 53 of 97)	-17690	ENSMUST00000194192.2	ENSMUSG00000026131	ENSMUST00000183100			Dst			protein_coding
e11ve16_cond2_146	chr1	34299976	34300765	+	6.46318	NA	intron (ENSMUST00000182018.7, intron 28 of 31)	protein_coding-intron (ENSMUST00000097785.9, intron 94 of 97)	5924	ENSMUST00000182507.3	ENSMUSG00000026131	ENSMUST00000183100			Dst			protein_coding
e11ve16_cond2_147	chr1	34459647	34460197	+	6.56418	NA	exon (ENSMUST00000185610.1, exon 1 of 1)	protein_coding-exon (ENSMUST00000185610.1, exon 1 of 1)	130	ENSMUST00000188884.2	ENSMUSG00000026126	ENSMUST00000188972			Ptpn18			protein_coding
e11ve16_cond2_148	chr1	34472237	34472636	+	4.75371	NA	promoter-TSS (ENSMUST00000188972.2)	protein_coding-promoter-TSS (ENSMUST00000188972.2)	-284	ENSMUST00000188972.2	ENSMUSG00000026126	ENSMUST00000188972			Ptpn18			protein_coding
e11ve16_cond2_149	chr1	34815444	34816049	+	4.62029	NA	exon (ENSMUST00000047534.11, exon 7 of 7)	protein_coding-exon (ENSMUST00000047534.11, exon 7 of 7)	-3838	ENSMUST00000193040.2	ENSMUSG00000104002	ENSMUST00000193040			Gm38336			lncRNA
e11ve16_cond2_150	chr1	34863945	34864997	+	7.46232	NA	TTS (ENSMUST00000152654.2)	protein_coding-TTS (ENSMUST00000152654.2)	12634	ENSMUST00000152654.2	ENSMUSG00000026123	ENSMUST00000152654			Plekhb2			protein_coding
e11ve16_cond2_151	chr1	35094585	35095316	+	6.26044	NA	Intergenic	Intergenic	84134	ENSMUST00000104043.1	ENSMUSG00000077231	ENSMUST00000104043			Gm25096			snoRNA
e11ve16_cond2_152	chr1	36088177	36088664	+	3.92233	NA	intron (ENSMUST00000088174.3, intron 1 of 1)	protein_coding-intron (ENSMUST00000088174.3, intron 1 of 1)	-13270	ENSMUST00000194670.1	ENSMUSG00000045216	ENSMUST00000088174			Hs6st1			protein_coding
e11ve16_cond2_153	chr1	36272702	36273035	+	4.98436	NA	intron (ENSMUST00000056946.7, intron 1 of 3)	protein_coding-intron (ENSMUST00000056946.7, intron 1 of 3)	567	ENSMUST00000056946.7	ENSMUSG00000047180	ENSMUST00000188666			Neurl3			protein_coding
e11ve16_cond2_154	chr1	37057034	37057583	+	11.448	NA	intron (ENSMUST00000027289.13, intron 4 of 24)	protein_coding-intron (ENSMUST00000027289.13, intron 4 of 24)	21600	ENSMUST00000027289.13	ENSMUSG00000050122	ENSMUST00000027289			Vwa3b			protein_coding
e11ve16_cond2_155	chr1	37350448	37350674	+	4.06912	NA	intron (ENSMUST00000136846.7, intron 1 of 25)	protein_coding-intron (ENSMUST00000027287.10, intron 1 of 25)	-6836	ENSMUST00000193774.5	ENSMUSG00000026113	ENSMUST00000123124			Inpp4a			protein_coding
e11ve16_cond2_156	chr1	37350934	37351506	+	4.31816	NA	intron (ENSMUST00000136846.7, intron 1 of 25)	protein_coding-intron (ENSMUST00000027287.10, intron 1 of 25)	-6177	ENSMUST00000193774.5	ENSMUSG00000026113	ENSMUST00000123124			Inpp4a			protein_coding
e11ve16_cond2_157	chr1	37686880	37688434	+	10.5624	NA	intron (ENSMUST00000160589.1, intron 1 of 3)	protein_coding-intron (ENSMUST00000160589.1, intron 1 of 3)	9007	ENSMUST00000192480.1	ENSMUSG00000102650	ENSMUST00000192480			Gm19863			TEC
e11ve16_cond2_158	chr1	37696441	37697187	+	11.7267	NA	promoter-TSS (ENSMUST00000192480.1)	TEC-promoter-TSS (ENSMUST00000192480.1)	-150	ENSMUST00000192480.1	ENSMUSG00000102650	ENSMUST00000192480			Gm19863			TEC
e11ve16_cond2_159	chr1	37864860	37865367	+	7.03753	NA	promoter-TSS (ENSMUST00000041815.14)	protein_coding-promoter-TSS (ENSMUST00000041815.14)	-34	ENSMUST00000041815.14	ENSMUSG00000060771	ENSMUST00000134024			Tsga10			protein_coding
e11ve16_cond2_160	chr1	37956352	37957172	+	5.09898	NA	intron (ENSMUST00000114894.1, intron 1 of 5)	protein_coding-intron (ENSMUST00000027254.9, intron 1 of 5)	997	ENSMUST00000114894.1	ENSMUSG00000026085	ENSMUST00000144184			Lyg1			protein_coding
e11ve16_cond2_161	chr1	38129770	38129975	+	5.67806	NA	promoter-TSS (ENSMUST00000027251.11)	protein_coding-promoter-TSS (ENSMUST00000027251.11)	-71	ENSMUST00000195383.1	ENSMUSG00000026082	ENSMUST00000027251			Rev1			protein_coding
e11ve16_cond2_162	chr1	38307677	38308606	+	5.54326	NA	intron (ENSMUST00000129696.1, intron 1 of 2)	protein_coding-intron (ENSMUST00000039827.13, intron 9 of 22)	239	ENSMUST00000129696.1	ENSMUSG00000085280	ENSMUST00000129696			Gm16151			lncRNA
e11ve16_cond2_163	chr1	38450670	38450925	+	6.93254	NA	intron (ENSMUST00000039827.13, intron 5 of 22)	protein_coding-intron (ENSMUST00000027250.13, intron 5 of 7)	-36722	ENSMUST00000195175.1	ENSMUSG00000102984	ENSMUST00000195175			Gm34727			processed_pseudogene
e11ve16_cond2_164	chr1	39186651	39187441	+	6.32141	NA	promoter-TSS (ENSMUST00000184059.1)	miRNA-promoter-TSS (ENSMUST00000184059.1)	-54	ENSMUST00000184059.1	ENSMUSG00000098833	ENSMUST00000184059			Mir6349			miRNA
e11ve16_cond2_165	chr1	39237661	39238072	+	8.89641	NA	intron (ENSMUST00000056815.8, intron 1 of 20)	protein_coding-intron (ENSMUST00000056815.8, intron 1 of 20)	38699	ENSMUST00000174365.1	ENSMUSG00000092553	ENSMUST00000174365			Gm20428			processed_pseudogene
e11ve16_cond2_166	chr1	39314022	39314314	+	3.71804	NA	promoter-TSS (ENSMUST00000173076.1)	processed_pseudogene-promoter-TSS (ENSMUST00000173076.1)	-731	ENSMUST00000173076.1	ENSMUSG00000092563	ENSMUST00000173076			Gm3617			processed_pseudogene
e11ve16_cond2_167	chr1	39318039	39318404	+	6.78027	NA	intron (ENSMUST00000056815.8, intron 7 of 20)	protein_coding-intron (ENSMUST00000056815.8, intron 7 of 20)	3322	ENSMUST00000173076.1	ENSMUSG00000092563	ENSMUST00000173076			Gm3617			processed_pseudogene
e11ve16_cond2_168	chr1	39417653	39417990	+	5.5578	NA	intron (ENSMUST00000054462.10, intron 2 of 19)	protein_coding-intron (ENSMUST00000054462.10, intron 2 of 19)	2111	ENSMUST00000191698.1	ENSMUSG00000102607	ENSMUST00000191698			Gm37265			TEC
e11ve16_cond2_169	chr1	39425048	39425963	+	7.63536	NA	intron (ENSMUST00000054462.10, intron 2 of 19)	protein_coding-intron (ENSMUST00000054462.10, intron 2 of 19)	-5573	ENSMUST00000191698.1	ENSMUSG00000102607	ENSMUST00000191698			Gm37265			TEC
e11ve16_cond2_170	chr1	39456377	39456861	+	9.3706	NA	intron (ENSMUST00000193823.1, intron 1 of 18)	protein_coding-intron (ENSMUST00000054462.10, intron 1 of 19)	22042	ENSMUST00000192531.5	ENSMUSG00000003134	ENSMUST00000054462			Tbc1d8			protein_coding
e11ve16_cond2_171	chr1	39458053	39458690	+	8.90413	NA	intron (ENSMUST00000193823.1, intron 1 of 18)	protein_coding-intron (ENSMUST00000054462.10, intron 1 of 19)	20290	ENSMUST00000192531.5	ENSMUSG00000003134	ENSMUST00000054462			Tbc1d8			protein_coding
e11ve16_cond2_172	chr1	40139616	40140577	+	9.22638	NA	Intergenic	Intergenic	51585	ENSMUST00000193969.1	ENSMUSG00000102975	ENSMUST00000193969			Gm37347			TEC
e11ve16_cond2_173	chr1	40190486	40191376	+	10.9307	NA	Intergenic	Intergenic	-34149	ENSMUST00000027241.10	ENSMUSG00000026072	ENSMUST00000195402			Il1r1			protein_coding
e11ve16_cond2_174	chr1	40224627	40225116	+	6.45882	NA	promoter-TSS (ENSMUST00000027241.10)	protein_coding-promoter-TSS (ENSMUST00000027241.10)	-209	ENSMUST00000027241.10	ENSMUSG00000026072	ENSMUST00000195402			Il1r1			protein_coding
e11ve16_cond2_175	chr1	40253135	40253392	+	3.77282	NA	intron (ENSMUST00000027241.10, intron 1 of 10)	protein_coding-intron (ENSMUST00000027241.10, intron 1 of 10)	-13323	ENSMUST00000114795.2	ENSMUSG00000026072	ENSMUST00000195402			Il1r1			protein_coding
e11ve16_cond2_176	chr1	40266562	40267117	+	4.0939	NA	exon (ENSMUST00000114795.2, exon 1 of 11)	protein_coding-exon (ENSMUST00000114795.2, exon 1 of 11)	182	ENSMUST00000195402.1	ENSMUSG00000026072	ENSMUST00000195402			Il1r1			protein_coding
e11ve16_cond2_177	chr1	40279259	40279848	+	8.35112	NA	intron (ENSMUST00000114795.2, intron 1 of 10)	protein_coding-intron (ENSMUST00000027241.10, intron 1 of 10)	12896	ENSMUST00000195402.1	ENSMUSG00000026072	ENSMUST00000195402			Il1r1			protein_coding
e11ve16_cond2_178	chr1	40465530	40466021	+	19.7601	NA	promoter-TSS (ENSMUST00000087983.7)	protein_coding-promoter-TSS (ENSMUST00000087983.7)	99	ENSMUST00000193391.5	ENSMUSG00000026070	ENSMUST00000193391			Il18r1			protein_coding
e11ve16_cond2_179	chr1	40499276	40500094	+	5.85091	NA	exon (ENSMUST00000108044.3, exon 11 of 11)	protein_coding-exon (ENSMUST00000108044.3, exon 11 of 11)	-15677	ENSMUST00000027237.11	ENSMUSG00000026068	ENSMUST00000027237			Il18rap			protein_coding
e11ve16_cond2_180	chr1	40501670	40502150	+	10.5617	NA	Intergenic	Intergenic	-13452	ENSMUST00000027237.11	ENSMUSG00000026068	ENSMUST00000027237			Il18rap			protein_coding
e11ve16_cond2_181	chr1	40790057	40790293	+	3.52843	NA	intron (ENSMUST00000039672.5, intron 1 of 5)	protein_coding-intron (ENSMUST00000039672.5, intron 1 of 5)	482	ENSMUST00000144385.1	ENSMUSG00000041945	ENSMUST00000039672			Mfsd9			protein_coding
e11ve16_cond2_182	chr1	40790446	40790760	+	4.14849	NA	promoter-TSS (ENSMUST00000039672.5)	protein_coding-promoter-TSS (ENSMUST00000039672.5)	54	ENSMUST00000144385.1	ENSMUSG00000041945	ENSMUST00000039672			Mfsd9			protein_coding
e11ve16_cond2_183	chr1	41652547	41653345	+	10.6637	NA	Intergenic	Intergenic	-123403	ENSMUST00000191087.1	ENSMUSG00000100185	ENSMUST00000191087			Gm28634			lncRNA
e11ve16_cond2_184	chr1	41831567	41831948	+	4.9715	NA	intron (ENSMUST00000186391.1, intron 1 of 5)	lncRNA-intron (ENSMUST00000186391.1, intron 1 of 5)	49949	ENSMUST00000186391.1	ENSMUSG00000100832	ENSMUST00000187227			Gm29260			lncRNA
e11ve16_cond2_185	chr1	41917285	41917516	+	4.47285	NA	promoter-TSS (ENSMUST00000187227.1)	lncRNA-promoter-TSS (ENSMUST00000187227.1)	-952	ENSMUST00000187227.1	ENSMUSG00000100832	ENSMUST00000187227			Gm29260			lncRNA
e11ve16_cond2_186	chr1	42226192	42226823	+	14.4609	NA	Intergenic	Intergenic	-3219	ENSMUST00000066196.1	ENSMUSG00000053640	ENSMUST00000188087			Gm9915			lncRNA
e11ve16_cond2_187	chr1	42504771	42505071	+	4.90818	NA	Intergenic	Intergenic	13108	ENSMUST00000191992.1	ENSMUSG00000103106	ENSMUST00000191992			Gm37047			TEC
e11ve16_cond2_188	chr1	42878870	42879342	+	5.13951	NA	intron (ENSMUST00000188174.6, intron 2 of 3)	protein_coding-intron (ENSMUST00000057208.12, intron 2 of 10)	-8631	ENSMUST00000201108.3	ENSMUSG00000060679	ENSMUST00000057208			Mrps9			protein_coding
e11ve16_cond2_189	chr1	42894381	42895416	+	17.0869	NA	intron (ENSMUST00000185376.6, intron 5 of 7)	protein_coding-intron (ENSMUST00000057208.12, intron 5 of 10)	7161	ENSMUST00000201108.3	ENSMUSG00000060679	ENSMUST00000057208			Mrps9			protein_coding
e11ve16_cond2_190	chr1	43066400	43066608	+	3.22743	NA	intron (ENSMUST00000188728.1, intron 3 of 4)	protein_coding-intron (ENSMUST00000095014.7, intron 5 of 12)	-5571	ENSMUST00000188598.1	ENSMUSG00000070939	ENSMUST00000190427			Tgfbrap1			protein_coding
e11ve16_cond2_191	chr1	43070441	43071230	+	14.5437	NA	TTS (ENSMUST00000190427.6)	protein_coding-TTS (ENSMUST00000190427.6)	-9902	ENSMUST00000188598.1	ENSMUSG00000070939	ENSMUST00000190427			Tgfbrap1			protein_coding
e11ve16_cond2_192	chr1	43124702	43125068	+	8.21458	NA	intron (ENSMUST00000008280.13, intron 5 of 5)	protein_coding-intron (ENSMUST00000008280.13, intron 5 of 5)	26175	ENSMUST00000010434.7	ENSMUSG00000010290	ENSMUST00000010434			AI597479			protein_coding
e11ve16_cond2_193	chr1	43464163	43464435	+	7.52558	NA	intron (ENSMUST00000086421.8, intron 1 of 4)	protein_coding-intron (ENSMUST00000086421.8, intron 1 of 4)	7026	ENSMUST00000124817.1	ENSMUSG00000066877	ENSMUST00000114744			Nck2			protein_coding
e11ve16_cond2_194	chr1	43593711	43595149	+	9.95467	NA	Intergenic	Intergenic	34157	ENSMUST00000193169.1	ENSMUSG00000103945	ENSMUST00000193169			Gm38228			TEC
e11ve16_cond2_195	chr1	43694659	43695438	+	18.6819	NA	Intergenic	Intergenic	-35554	ENSMUST00000027217.8	ENSMUSG00000026051	ENSMUST00000027217			Ecrg4			protein_coding
e11ve16_cond2_196	chr1	43715002	43715293	+	10.6363	NA	Intergenic	Intergenic	-15455	ENSMUST00000027217.8	ENSMUSG00000026051	ENSMUST00000027217			Ecrg4			protein_coding
e11ve16_cond2_197	chr1	43730537	43730911	+	8.6358	NA	exon (ENSMUST00000027217.8, exon 1 of 4)	protein_coding-exon (ENSMUST00000027217.8, exon 1 of 4)	122	ENSMUST00000027217.8	ENSMUSG00000026051	ENSMUST00000027217			Ecrg4			protein_coding
e11ve16_cond2_198	chr1	43827769	43828168	+	4.54498	NA	promoter-TSS (ENSMUST00000076997.12)	protein_coding-promoter-TSS (ENSMUST00000076997.12)	-168	ENSMUST00000126008.7	ENSMUSG00000057363	ENSMUST00000153317			Uxs1			protein_coding
e11ve16_cond2_199	chr1	43879061	43879477	+	8.32409	NA	Intergenic	Intergenic	-8782	ENSMUST00000191395.1	ENSMUSG00000100701	ENSMUST00000191395			Gm19587			processed_pseudogene
e11ve16_cond2_200	chr1	43933714	43933975	+	5.82888	NA	promoter-TSS (ENSMUST00000087933.9)	protein_coding-promoter-TSS (ENSMUST00000087933.9)	-163	ENSMUST00000087933.9	ENSMUSG00000041763	ENSMUST00000187115			Tpp2			protein_coding
e11ve16_cond2_201	chr1	44102254	44102572	+	5.66327	NA	promoter-TSS (ENSMUST00000027215.11)	protein_coding-promoter-TSS (ENSMUST00000027215.11)	1	ENSMUST00000143327.1	ENSMUSG00000026049	ENSMUST00000147571			Tex30			protein_coding
e11ve16_cond2_202	chr1	45091032	45091245	+	4.6919	NA	Intergenic	Intergenic	-86929	ENSMUST00000189212.1	ENSMUSG00000101937	ENSMUST00000189212			Gm5268			processed_pseudogene
e11ve16_cond2_203	chr1	45135411	45135681	+	5.58912	NA	Intergenic	Intergenic	-42521	ENSMUST00000189212.1	ENSMUSG00000101937	ENSMUST00000189212			Gm5268			processed_pseudogene
e11ve16_cond2_204	chr1	45541326	45542335	+	8.19249	NA	Intergenic	Intergenic	-21076	ENSMUST00000186840.1	ENSMUSG00000100361	ENSMUST00000186840			Gm7063			processed_pseudogene
e11ve16_cond2_205	chr1	45830704	45830973	+	4.83139	NA	Intergenic	Intergenic	5950	ENSMUST00000191371.1	ENSMUSG00000099850	ENSMUST00000191371			Gm28906			processed_pseudogene
e11ve16_cond2_206	chr1	45986033	45986906	+	6.23842	NA	Intergenic	Intergenic	4921	ENSMUST00000085632.3	ENSMUSG00000070896	ENSMUST00000085632			Rpl23a-ps1			processed_pseudogene
e11ve16_cond2_207	chr1	46213653	46213988	+	5.95472	NA	intron (ENSMUST00000069293.9, intron 33 of 65)	protein_coding-intron (ENSMUST00000069293.9, intron 33 of 65)	-21428	ENSMUST00000187548.1	ENSMUSG00000041144	ENSMUST00000188209			Dnah7b			protein_coding
e11ve16_cond2_208	chr1	46243145	46243353	+	11.0353	NA	intron (ENSMUST00000238212.1, intron 44 of 64)	protein_coding-intron (ENSMUST00000069293.9, intron 45 of 65)	8001	ENSMUST00000187548.1	ENSMUSG00000041144	ENSMUST00000188209			Dnah7b			protein_coding
e11ve16_cond2_209	chr1	46408615	46409154	+	9.60918	NA	Intergenic	Intergenic	-5618	ENSMUST00000188705.1	ENSMUSG00000101262	ENSMUST00000188705			Gm8326			processed_pseudogene
e11ve16_cond2_210	chr1	46853220	46854284	+	9.26329	NA	exon (ENSMUST00000027131.5, exon 1 of 10)	protein_coding-exon (ENSMUST00000027131.5, exon 1 of 10)	294	ENSMUST00000027131.5	ENSMUSG00000025986	ENSMUST00000141226			Slc39a10			protein_coding
e11ve16_cond2_211	chr1	46863134	46864668	+	14.8093	NA	intron (ENSMUST00000186852.1, intron 1 of 1)	protein_coding-intron (ENSMUST00000185520.1, intron 1 of 1)	-9855	ENSMUST00000027131.5	ENSMUSG00000025986	ENSMUST00000141226			Slc39a10			protein_coding
e11ve16_cond2_212	chr1	46894364	46894683	+	4.03691	NA	Intergenic	Intergenic	-1671	ENSMUST00000186852.1	ENSMUSG00000025986	ENSMUST00000141226			Slc39a10			protein_coding
e11ve16_cond2_213	chr1	46901727	46902502	+	6.84681	NA	Intergenic	Intergenic	-5235	ENSMUST00000185210.1	ENSMUSG00000100160	ENSMUST00000185210			Gm28527			processed_pseudogene
e11ve16_cond2_214	chr1	47216735	47217210	+	9.33214	NA	Intergenic	Intergenic	63511	ENSMUST00000190006.1	ENSMUSG00000101447	ENSMUST00000190006			Gm28826			lncRNA
e11ve16_cond2_215	chr1	51265168	51266193	+	6.70141	NA	intron (ENSMUST00000189867.1, intron 2 of 4)	lncRNA-intron (ENSMUST00000189867.1, intron 2 of 4)	-23446	ENSMUST00000051572.7	ENSMUSG00000045954	ENSMUST00000051572			Cavin2			protein_coding
e11ve16_cond2_216	chr1	51271566	51271977	+	3.93742	NA	intron (ENSMUST00000189867.1, intron 2 of 4)	lncRNA-intron (ENSMUST00000189867.1, intron 2 of 4)	-17355	ENSMUST00000051572.7	ENSMUSG00000045954	ENSMUST00000051572			Cavin2			protein_coding
e11ve16_cond2_217	chr1	51277760	51278109	+	4.44167	NA	intron (ENSMUST00000189867.1, intron 2 of 4)	lncRNA-intron (ENSMUST00000189867.1, intron 2 of 4)	-11192	ENSMUST00000051572.7	ENSMUSG00000045954	ENSMUST00000051572			Cavin2			protein_coding
e11ve16_cond2_218	chr1	51288947	51289697	+	5.03554	NA	exon (ENSMUST00000051572.7, exon 1 of 2)	protein_coding-exon (ENSMUST00000051572.7, exon 1 of 2)	196	ENSMUST00000051572.7	ENSMUSG00000045954	ENSMUST00000051572			Cavin2			protein_coding
e11ve16_cond2_219	chr1	51334111	51334401	+	5.39448	NA	promoter-TSS (ENSMUST00000189867.1)	lncRNA-promoter-TSS (ENSMUST00000189867.1)	-477	ENSMUST00000189867.1	ENSMUSG00000101799	ENSMUST00000189867			9330175M20Rik			lncRNA
e11ve16_cond2_220	chr1	51466653	51466854	+	4.64344	NA	exon (ENSMUST00000186003.6, exon 7 of 7)	protein_coding-exon (ENSMUST00000186003.6, exon 7 of 7)	6643	ENSMUST00000185961.1	ENSMUSG00000026107	ENSMUST00000188204			Nabp1			protein_coding
e11ve16_cond2_221	chr1	51478309	51478864	+	4.90848	NA	promoter-TSS (ENSMUST00000027279.11)	protein_coding-promoter-TSS (ENSMUST00000027279.11)	-161	ENSMUST00000188051.6	ENSMUSG00000026107	ENSMUST00000188204			Nabp1			protein_coding
e11ve16_cond2_222	chr1	51530361	51530750	+	4.23409	NA	intron (ENSMUST00000189410.1, intron 3 of 3)	lncRNA-intron (ENSMUST00000189410.1, intron 3 of 3)	-1186	ENSMUST00000194442.1	ENSMUSG00000103424	ENSMUST00000194442			Gm37535			TEC
e11ve16_cond2_223	chr1	52119421	52119853	+	5.60384	NA	promoter-TSS (ENSMUST00000185743.1)	protein_coding-promoter-TSS (ENSMUST00000185743.1)	13	ENSMUST00000186057.6	ENSMUSG00000026104	ENSMUST00000186857			Stat1			protein_coding
e11ve16_cond2_224	chr1	52269791	52270735	+	18.8709	NA	Intergenic	Intergenic	18832	ENSMUST00000185256.1	ENSMUSG00000099648	ENSMUST00000185256			Gm5975			processed_pseudogene
e11ve16_cond2_225	chr1	52501674	52502267	+	4.86573	NA	Intergenic	Intergenic	-1291	ENSMUST00000069792.13	ENSMUSG00000002881	ENSMUST00000167732			Nab1			protein_coding
e11ve16_cond2_226	chr1	52578354	52578808	+	11.6359	NA	intron (ENSMUST00000188544.1, intron 2 of 5)	lncRNA-intron (ENSMUST00000188544.1, intron 2 of 5)	1710	ENSMUST00000188544.1	ENSMUSG00000099878	ENSMUST00000188544			Gm28178			lncRNA
e11ve16_cond2_227	chr1	52581394	52581653	+	5.46996	NA	intron (ENSMUST00000189527.1, intron 4 of 4)	lncRNA-intron (ENSMUST00000189527.1, intron 4 of 4)	-1232	ENSMUST00000188544.1	ENSMUSG00000099878	ENSMUST00000188544			Gm28178			lncRNA
e11ve16_cond2_228	chr1	52676921	52677129	+	4.27785	NA	intron (ENSMUST00000156876.7, intron 2 of 6)	protein_coding-intron (ENSMUST00000087701.3, intron 2 of 5)	-7674	ENSMUST00000149887.1	ENSMUSG00000041439	ENSMUST00000087701			Mfsd6			protein_coding
e11ve16_cond2_229	chr1	52844655	52845080	+	9.11692	NA	promoter-TSS (ENSMUST00000044478.6)	protein_coding-promoter-TSS (ENSMUST00000044478.6)	-62	ENSMUST00000186922.1	ENSMUSG00000041426	ENSMUST00000159352			Hibch			protein_coding
e11ve16_cond2_230	chr1	53194972	53195682	+	5.19112	NA	promoter-TSS (ENSMUST00000191402.1)	lncRNA-promoter-TSS (ENSMUST00000191402.1)	-786	ENSMUST00000191402.1	ENSMUSG00000100763	ENSMUST00000191402			Gm28777			lncRNA
e11ve16_cond2_231	chr1	53296983	53297572	+	7.50891	NA	promoter-TSS (ENSMUST00000027267.13)	protein_coding-promoter-TSS (ENSMUST00000027267.13)	166	ENSMUST00000190734.1	ENSMUSG00000100679	ENSMUST00000190734			Gm28778			protein_coding
e11ve16_cond2_232	chr1	53703886	53705031	+	12.1125	NA	intron (ENSMUST00000189677.1, intron 1 of 3)	protein_coding-intron (ENSMUST00000094964.6, intron 1 of 65)	2303	ENSMUST00000094964.6	ENSMUSG00000096141	ENSMUST00000094964			Dnah7a			protein_coding
e11ve16_cond2_233	chr1	53784939	53785204	+	4.1231	NA	promoter-TSS (ENSMUST00000185920.1)	protein_coding-promoter-TSS (ENSMUST00000185920.1)	86	ENSMUST00000185920.1	ENSMUSG00000026094	ENSMUST00000027263			Stk17b			protein_coding
e11ve16_cond2_234	chr1	53845403	53845621	+	4.59107	NA	intron (ENSMUST00000152870.1, intron 4 of 5)	protein_coding-intron (ENSMUST00000087659.10, intron 21 of 28)	-3912	ENSMUST00000184834.1	ENSMUSG00000098443	ENSMUST00000184834			Mir7681			miRNA
e11ve16_cond2_235	chr1	53845821	53846474	+	4.47688	NA	intron (ENSMUST00000152870.1, intron 4 of 5)	protein_coding-intron (ENSMUST00000087659.10, intron 21 of 28)	-3277	ENSMUST00000184834.1	ENSMUSG00000098443	ENSMUST00000184834			Mir7681			miRNA
e11ve16_cond2_236	chr1	53911823	53912151	+	6.47205	NA	intron (ENSMUST00000120904.7, intron 13 of 28)	protein_coding-intron (ENSMUST00000087659.10, intron 13 of 28)	-25046	ENSMUST00000157324.1	ENSMUSG00000087949	ENSMUST00000157324			Gm24251			snRNA
e11ve16_cond2_237	chr1	53978067	53978435	+	12.0144	NA	intron (ENSMUST00000146850.1, intron 2 of 3)	protein_coding-intron (ENSMUST00000087659.10, intron 2 of 28)	-91310	ENSMUST00000157324.1	ENSMUSG00000087949	ENSMUST00000157324			Gm24251			snRNA
e11ve16_cond2_238	chr1	54187821	54188380	+	6.89966	NA	intron (ENSMUST00000146850.1, intron 1 of 3)	protein_coding-intron (ENSMUST00000087659.10, intron 1 of 28)	5948	ENSMUST00000120904.7	ENSMUSG00000042807	ENSMUST00000087659			Hecw2			protein_coding
e11ve16_cond2_239	chr1	54826414	54826857	+	7.87989	NA	intron (ENSMUST00000044359.15, intron 2 of 27)	protein_coding-intron (ENSMUST00000044359.15, intron 2 of 27)	-13192	ENSMUST00000178905.1	ENSMUSG00000052331	ENSMUST00000178905			Ankrd44			protein_coding
e11ve16_cond2_240	chr1	54878247	54878541	+	5.33024	NA	intron (ENSMUST00000180327.7, intron 1 of 7)	protein_coding-intron (ENSMUST00000044359.15, intron 1 of 27)	6317	ENSMUST00000177679.1	ENSMUSG00000052331	ENSMUST00000178905			Ankrd44			protein_coding
e11ve16_cond2_241	chr1	54898702	54899076	+	6.95285	NA	intron (ENSMUST00000180327.7, intron 1 of 7)	protein_coding-intron (ENSMUST00000044359.15, intron 1 of 27)	-14178	ENSMUST00000177679.1	ENSMUSG00000052331	ENSMUST00000178905			Ankrd44			protein_coding
e11ve16_cond2_242	chr1	54926016	54926390	+	6.48704	NA	exon (ENSMUST00000044359.15, exon 1 of 28)	protein_coding-exon (ENSMUST00000044359.15, exon 1 of 28)	151	ENSMUST00000178935.7	ENSMUSG00000052331	ENSMUST00000178905			Ankrd44			protein_coding
e11ve16_cond2_243	chr1	55052438	55053161	+	5.13707	NA	promoter-TSS (ENSMUST00000027125.6)	protein_coding-promoter-TSS (ENSMUST00000027125.6)	29	ENSMUST00000027125.6	ENSMUSG00000025981	ENSMUST00000185474			Coq10b			protein_coding
e11ve16_cond2_244	chr1	55076842	55077678	+	12.4985	NA	TTS (ENSMUST00000027123.14)	protein_coding-TTS (ENSMUST00000027123.14)	10764	ENSMUST00000027123.14	ENSMUSG00000025980	ENSMUST00000127861			Hspd1			protein_coding
e11ve16_cond2_245	chr1	55087825	55088272	+	4.10349	NA	promoter-TSS (ENSMUST00000027123.14)	protein_coding-promoter-TSS (ENSMUST00000027123.14)	-24	ENSMUST00000027123.14	ENSMUSG00000025980	ENSMUST00000127861			Hspd1			protein_coding
e11ve16_cond2_246	chr1	55221807	55222205	+	4.61378	NA	intron (ENSMUST00000027121.14, intron 1 of 8)	protein_coding-intron (ENSMUST00000027121.14, intron 1 of 8)	-4245	ENSMUST00000181563.1	ENSMUSG00000097649	ENSMUST00000209801			Gm10561			lncRNA
e11ve16_cond2_247	chr1	55417194	55417663	+	5.39043	NA	intron (ENSMUST00000042986.9, intron 1 of 5)	protein_coding-intron (ENSMUST00000042986.9, intron 1 of 5)	11507	ENSMUST00000042986.9	ENSMUSG00000038349	ENSMUST00000042986			Plcl1			protein_coding
e11ve16_cond2_248	chr1	55565694	55566648	+	8.85642	NA	intron (ENSMUST00000042986.9, intron 1 of 5)	protein_coding-intron (ENSMUST00000042986.9, intron 1 of 5)	6711	ENSMUST00000193032.1	ENSMUSG00000102831	ENSMUST00000193032			Gm37382			TEC
e11ve16_cond2_249	chr1	56811750	56812055	+	7.60101	NA	intron (ENSMUST00000114415.9, intron 10 of 10)	protein_coding-intron (ENSMUST00000042857.13, intron 9 of 9)	157938	ENSMUST00000176759.1	ENSMUSG00000038331	ENSMUST00000177424			Satb2			protein_coding
e11ve16_cond2_250	chr1	56897617	56898180	+	6.51369	NA	intron (ENSMUST00000114415.9, intron 5 of 10)	protein_coding-intron (ENSMUST00000042857.13, intron 4 of 9)	71942	ENSMUST00000176759.1	ENSMUSG00000038331	ENSMUST00000177424			Satb2			protein_coding
e11ve16_cond2_251	chr1	56972497	56972825	+	4.37201	NA	promoter-TSS (ENSMUST00000042857.13)	protein_coding-promoter-TSS (ENSMUST00000042857.13)	-159	ENSMUST00000042857.13	ENSMUSG00000038331	ENSMUST00000177424			Satb2			protein_coding
e11ve16_cond2_252	chr1	57266926	57267410	+	6.57223	NA	Intergenic	Intergenic	25233	ENSMUST00000188353.1	ENSMUSG00000101129	ENSMUST00000188353			Gm5254			processed_pseudogene
e11ve16_cond2_253	chr1	57377563	57378147	+	5.44732	NA	promoter-TSS (ENSMUST00000181949.2)	lncRNA-promoter-TSS (ENSMUST00000181949.2)	215	ENSMUST00000187255.1	ENSMUSG00000038323	ENSMUST00000042734			1700066M21Rik			protein_coding
e11ve16_cond2_254	chr1	57717507	57717707	+	3.46908	NA	Intergenic	Intergenic	-56555	ENSMUST00000172287.7	ENSMUSG00000038305	ENSMUST00000168016			Spats2l			protein_coding
e11ve16_cond2_255	chr1	57774754	57775154	+	4.53422	NA	promoter-TSS (ENSMUST00000165235.1)	protein_coding-promoter-TSS (ENSMUST00000165235.1)	37	ENSMUST00000168895.1	ENSMUSG00000038305	ENSMUST00000168016			Spats2l			protein_coding
e11ve16_cond2_256	chr1	57885086	57885293	+	4.35878	NA	intron (ENSMUST00000171699.7, intron 6 of 9)	protein_coding-intron (ENSMUST00000163239.7, intron 4 of 11)	-16882	ENSMUST00000164353.2	ENSMUSG00000038305	ENSMUST00000168016			Spats2l			protein_coding
e11ve16_cond2_257	chr1	58029434	58029741	+	4.08246	NA	promoter-TSS (ENSMUST00000001027.6)	protein_coding-promoter-TSS (ENSMUST00000001027.6)	-344	ENSMUST00000001027.6	ENSMUSG00000063558	ENSMUST00000001027			Aox1			protein_coding
e11ve16_cond2_258	chr1	58652515	58652759	+	3.84398	NA	promoter-TSS (ENSMUST00000185352.1)	transcribed_unprocessed_pseudogene-promoter-TSS (ENSMUST00000185352.1)	-4	ENSMUST00000185352.1	ENSMUSG00000102059	ENSMUST00000185352			Gm20257			transcribed_unprocessed_pseudogene
e11ve16_cond2_259	chr1	59134079	59134931	+	19.2101	NA	intron (ENSMUST00000066374.13, intron 13 of 21)	protein_coding-intron (ENSMUST00000066374.13, intron 13 of 21)	11297	ENSMUST00000187825.6	ENSMUSG00000079550	ENSMUST00000189884			Mpp4			protein_coding
e11ve16_cond2_260	chr1	59497858	59498221	+	3.4852	NA	Intergenic	Intergenic	-5434	ENSMUST00000180778.1	ENSMUSG00000097819	ENSMUST00000180778			Gm26813			lncRNA
e11ve16_cond2_261	chr1	59895144	59895941	+	6.04061	NA	Intergenic	Intergenic	-7853	ENSMUST00000193096.1	ENSMUSG00000103131	ENSMUST00000193096			Gm37977			TEC
e11ve16_cond2_262	chr1	60566688	60567319	+	4.5799	NA	promoter-TSS (ENSMUST00000027168.11)	protein_coding-promoter-TSS (ENSMUST00000027168.11)	101	ENSMUST00000142258.2	ENSMUSG00000026014	ENSMUST00000142258			Raph1			protein_coding
e11ve16_cond2_263	chr1	60609510	60609710	+	5.41637	NA	Intergenic	Intergenic	4193	ENSMUST00000158348.1	ENSMUSG00000088973	ENSMUST00000158348			Gm23762			miRNA
e11ve16_cond2_264	chr1	61336339	61336735	+	12.6745	NA	Intergenic	Intergenic	34628	ENSMUST00000128274.2	ENSMUSG00000085248	ENSMUST00000128274			Gm11587			lncRNA
e11ve16_cond2_265	chr1	61779867	61780364	+	9.62848	NA	intron (ENSMUST00000138535.7, intron 3 of 4)	protein_coding-intron (ENSMUST00000046673.10, intron 2 of 21)	-25106	ENSMUST00000191979.1	ENSMUSG00000103002	ENSMUST00000191979			Gm38075			TEC
e11ve16_cond2_266	chr1	61874731	61875031	+	3.57475	NA	intron (ENSMUST00000046673.10, intron 2 of 21)	protein_coding-intron (ENSMUST00000046673.10, intron 2 of 21)	-23341	ENSMUST00000130699.1	ENSMUSG00000085842	ENSMUST00000130699			Pard3bos1			lncRNA
e11ve16_cond2_267	chr1	62041807	62042075	+	19.2888	NA	intron (ENSMUST00000094906.3, intron 3 of 21)	protein_coding-intron (ENSMUST00000046673.10, intron 3 of 21)	53398	ENSMUST00000188955.1	ENSMUSG00000101509	ENSMUST00000188955			Gm29641			processed_pseudogene
e11ve16_cond2_268	chr1	62042179	62042389	+	15.9374	NA	intron (ENSMUST00000094906.3, intron 3 of 21)	protein_coding-intron (ENSMUST00000046673.10, intron 3 of 21)	53055	ENSMUST00000188955.1	ENSMUSG00000101509	ENSMUST00000188955			Gm29641			processed_pseudogene
e11ve16_cond2_269	chr1	62070529	62071120	+	8.15331	NA	intron (ENSMUST00000094906.3, intron 3 of 21)	protein_coding-intron (ENSMUST00000046673.10, intron 3 of 21)	24515	ENSMUST00000188955.1	ENSMUSG00000101509	ENSMUST00000188955			Gm29641			processed_pseudogene
e11ve16_cond2_270	chr1	62579185	62579653	+	6.89521	NA	intron (ENSMUST00000046673.10, intron 20 of 21)	protein_coding-intron (ENSMUST00000046673.10, intron 20 of 21)	-43477	ENSMUST00000185587.1	ENSMUSG00000100750	ENSMUST00000185587			Gm29084			lncRNA
e11ve16_cond2_271	chr1	62704766	62705101	+	7.91369	NA	intron (ENSMUST00000126344.1, intron 1 of 2)	protein_coding-intron (ENSMUST00000027112.12, intron 1 of 15)	1231	ENSMUST00000114155.7	ENSMUSG00000025969	ENSMUST00000114155			Nrp2			protein_coding
e11ve16_cond2_272	chr1	62705210	62705419	+	4.96123	NA	intron (ENSMUST00000126344.1, intron 1 of 2)	protein_coding-intron (ENSMUST00000027112.12, intron 1 of 15)	1612	ENSMUST00000114155.7	ENSMUSG00000025969	ENSMUST00000114155			Nrp2			protein_coding
e11ve16_cond2_273	chr1	62858915	62859280	+	5.80607	NA	Intergenic	Intergenic	-26727	ENSMUST00000189802.1	ENSMUSG00000100426	ENSMUST00000189802			Gm4208			lncRNA
e11ve16_cond2_274	chr1	62934158	62934650	+	5.91765	NA	Intergenic	Intergenic	-91338	ENSMUST00000199516.1	ENSMUSG00000104991	ENSMUST00000199516			Gm44468			miRNA
e11ve16_cond2_275	chr1	62947592	62948407	+	27.1586	NA	Intergenic	Intergenic	-77743	ENSMUST00000199516.1	ENSMUSG00000104991	ENSMUST00000199516			Gm44468			miRNA
e11ve16_cond2_276	chr1	63705513	63706328	+	14.1781	NA	intron (ENSMUST00000114094.2, intron 9 of 10)	protein_coding-intron (ENSMUST00000114094.2, intron 9 of 10)	-18993	ENSMUST00000090313.4	ENSMUSG00000069085	ENSMUST00000126954			Dytn			protein_coding
e11ve16_cond2_277	chr1	64046153	64046504	+	7.71895	NA	intron (ENSMUST00000114086.7, intron 2 of 3)	protein_coding-intron (ENSMUST00000055001.9, intron 3 of 3)	-3827	ENSMUST00000184798.1	ENSMUSG00000098487	ENSMUST00000184798			Mir6899			miRNA
e11ve16_cond2_278	chr1	64121605	64122442	+	10.4629	NA	promoter-TSS (ENSMUST00000055001.9)	protein_coding-promoter-TSS (ENSMUST00000055001.9)	259	ENSMUST00000135075.1	ENSMUSG00000025959	ENSMUST00000135075			Klf7			protein_coding
e11ve16_cond2_279	chr1	64301489	64303087	+	7.24106	NA	intron (ENSMUST00000190863.1, intron 1 of 1)	lncRNA-intron (ENSMUST00000190863.1, intron 1 of 1)	755	ENSMUST00000190863.1	ENSMUSG00000101895	ENSMUST00000190863			Gm28981			lncRNA
e11ve16_cond2_280	chr1	64532177	64532900	+	4.6207	NA	promoter-TSS (ENSMUST00000049932.11)	protein_coding-promoter-TSS (ENSMUST00000049932.11)	-107	ENSMUST00000185594.6	ENSMUSG00000025958	ENSMUST00000187811			Creb1			protein_coding
e11ve16_cond2_281	chr1	64737478	64737992	+	7.8207	NA	promoter-TSS (ENSMUST00000063982.6)	protein_coding-promoter-TSS (ENSMUST00000063982.6)	14	ENSMUST00000116133.3	ENSMUSG00000045005	ENSMUST00000063982			Fzd5			protein_coding
e11ve16_cond2_282	chr1	64809247	64809456	+	5.68296	NA	intron (ENSMUST00000187188.1, intron 2 of 2)	protein_coding-intron (ENSMUST00000097713.1, intron 7 of 7)	27413	ENSMUST00000187188.1	ENSMUSG00000051344	ENSMUST00000187188			Plekhm3			protein_coding
e11ve16_cond2_283	chr1	64887612	64888098	+	6.17317	NA	intron (ENSMUST00000140857.1, intron 3 of 4)	protein_coding-intron (ENSMUST00000097713.1, intron 4 of 7)	40242	ENSMUST00000140857.1	ENSMUSG00000051344	ENSMUST00000187188			Plekhm3			protein_coding
e11ve16_cond2_284	chr1	65178327	65178929	+	4.52851	NA	intron (ENSMUST00000188109.6, intron 1 of 4)	protein_coding-intron (ENSMUST00000097709.10, intron 1 of 8)	553	ENSMUST00000097709.10	ENSMUSG00000025950	ENSMUST00000188109			Idh1			protein_coding
e11ve16_cond2_285	chr1	65186624	65186905	+	4.19545	NA	promoter-TSS (ENSMUST00000081154.13)	protein_coding-promoter-TSS (ENSMUST00000081154.13)	14	ENSMUST00000097707.4	ENSMUSG00000025949	ENSMUST00000186404			Pikfyve			protein_coding
e11ve16_cond2_286	chr1	65794407	65794608	+	4.20511	NA	Intergenic	Intergenic	-132013	ENSMUST00000027082.10	ENSMUSG00000025945	ENSMUST00000027082			Crygf			protein_coding
e11ve16_cond2_287	chr1	66175113	66175528	+	5.08452	NA	promoter-TSS (ENSMUST00000114015.7)	protein_coding-promoter-TSS (ENSMUST00000114015.7)	4	ENSMUST00000114015.7	ENSMUSG00000015222	ENSMUST00000114018			Map2			protein_coding
e11ve16_cond2_288	chr1	66187290	66187837	+	5.33843	NA	intron (ENSMUST00000124873.7, intron 1 of 3)	protein_coding-intron (ENSMUST00000114015.7, intron 1 of 13)	12013	ENSMUST00000125844.1	ENSMUSG00000015222	ENSMUST00000114018			Map2			protein_coding
e11ve16_cond2_289	chr1	66244772	66245194	+	5.46502	NA	intron (ENSMUST00000124873.7, intron 2 of 3)	protein_coding-intron (ENSMUST00000114015.7, intron 2 of 13)	-6664	ENSMUST00000114018.9	ENSMUSG00000015222	ENSMUST00000114018			Map2			protein_coding
e11ve16_cond2_290	chr1	66608022	66608812	+	16.0299	NA	exon (ENSMUST00000061620.16, exon 28 of 65)	protein_coding-exon (ENSMUST00000061620.16, exon 28 of 65)	-65313	ENSMUST00000187179.1	ENSMUSG00000055567	ENSMUST00000187179			Unc80			protein_coding
e11ve16_cond2_291	chr1	66617116	66617756	+	5.49079	NA	intron (ENSMUST00000061620.16, intron 29 of 64)	protein_coding-intron (ENSMUST00000061620.16, intron 29 of 64)	-56294	ENSMUST00000187179.1	ENSMUSG00000055567	ENSMUST00000187179			Unc80			protein_coding
e11ve16_cond2_292	chr1	66636385	66637461	+	17.8023	NA	intron (ENSMUST00000212557.2, intron 36 of 63)	protein_coding-intron (ENSMUST00000061620.16, intron 37 of 64)	-36807	ENSMUST00000187179.1	ENSMUSG00000055567	ENSMUST00000187179			Unc80			protein_coding
e11ve16_cond2_293	chr1	66700775	66701162	+	6.66284	NA	promoter-TSS (ENSMUST00000190404.1)	protein_coding-promoter-TSS (ENSMUST00000190404.1)	61	ENSMUST00000190404.1	ENSMUSG00000026005	ENSMUST00000142920			Rpe			protein_coding
e11ve16_cond2_294	chr1	66832136	66833750	+	9.11378	NA	intron (ENSMUST00000027153.5, intron 10 of 10)	protein_coding-intron (ENSMUST00000027153.5, intron 10 of 10)	-7029	ENSMUST00000193555.1	ENSMUSG00000103553	ENSMUST00000193555			Gm38218			TEC
e11ve16_cond2_295	chr1	66839708	66840434	+	5.9247	NA	intron (ENSMUST00000027153.5, intron 8 of 10)	protein_coding-intron (ENSMUST00000027153.5, intron 8 of 10)	9531	ENSMUST00000121857.1	ENSMUSG00000082769	ENSMUST00000121857			Gm15793			processed_pseudogene
e11ve16_cond2_296	chr1	66846062	66846503	+	10.8574	NA	intron (ENSMUST00000139208.1, intron 5 of 5)	protein_coding-intron (ENSMUST00000027153.5, intron 5 of 10)	3320	ENSMUST00000121857.1	ENSMUSG00000082769	ENSMUST00000121857			Gm15793			processed_pseudogene
e11ve16_cond2_297	chr1	66862714	66863426	+	9.23094	NA	intron (ENSMUST00000027153.5, intron 1 of 10)	protein_coding-intron (ENSMUST00000027153.5, intron 1 of 10)	207	ENSMUST00000027153.5	ENSMUSG00000026003	ENSMUST00000027153			Acadl			protein_coding
e11ve16_cond2_298	chr1	66895774	66896380	+	7.54269	NA	Intergenic	Intergenic	29280	ENSMUST00000104140.1	ENSMUSG00000077328	ENSMUST00000104140			Gm25832			snoRNA
e11ve16_cond2_299	chr1	66900905	66901612	+	6.92152	NA	Intergenic	Intergenic	33440	ENSMUST00000186346.1	ENSMUSG00000061816	ENSMUST00000186346			Myl1			protein_coding
e11ve16_cond2_300	chr1	67000766	67001019	+	3.77225	NA	exon (ENSMUST00000027149.11, exon 10 of 10)	protein_coding-exon (ENSMUST00000027149.11, exon 10 of 10)	20173	ENSMUST00000133508.1	ENSMUSG00000026000	ENSMUST00000113979			Lancl1			protein_coding
e11ve16_cond2_301	chr1	67173420	67173672	+	4.31283	NA	intron (ENSMUST00000027144.7, intron 18 of 37)	protein_coding-intron (ENSMUST00000027144.7, intron 18 of 37)	50520	ENSMUST00000027144.7	ENSMUSG00000025991	ENSMUST00000027144			Cps1			protein_coding
e11ve16_cond2_302	chr1	67173853	67174534	+	7.00501	NA	intron (ENSMUST00000027144.7, intron 18 of 37)	protein_coding-intron (ENSMUST00000027144.7, intron 18 of 37)	51167	ENSMUST00000027144.7	ENSMUSG00000025991	ENSMUST00000027144			Cps1			protein_coding
e11ve16_cond2_303	chr1	67178886	67179613	+	7.51984	NA	intron (ENSMUST00000027144.7, intron 20 of 37)	protein_coding-intron (ENSMUST00000027144.7, intron 20 of 37)	56223	ENSMUST00000027144.7	ENSMUSG00000025991	ENSMUST00000027144			Cps1			protein_coding
e11ve16_cond2_304	chr1	67217396	67217606	+	6.45554	NA	intron (ENSMUST00000027144.7, intron 32 of 37)	protein_coding-intron (ENSMUST00000027144.7, intron 32 of 37)	-31699	ENSMUST00000140506.1	ENSMUSG00000086204	ENSMUST00000140506			Gm15668			lncRNA
e11ve16_cond2_305	chr1	67437150	67437486	+	9.05408	NA	Intergenic	Intergenic	-147735	ENSMUST00000119302.1	ENSMUSG00000082473	ENSMUST00000119302			Kif22-ps			processed_pseudogene
e11ve16_cond2_306	chr1	67518215	67518984	+	10.3453	NA	Intergenic	Intergenic	-66454	ENSMUST00000119302.1	ENSMUSG00000082473	ENSMUST00000119302			Kif22-ps			processed_pseudogene
e11ve16_cond2_307	chr1	67546371	67546639	+	9.4014	NA	Intergenic	Intergenic	-38548	ENSMUST00000119302.1	ENSMUSG00000082473	ENSMUST00000119302			Kif22-ps			processed_pseudogene
e11ve16_cond2_308	chr1	67894914	67895144	+	4.96675	NA	Intergenic	Intergenic	-8201	ENSMUST00000192182.1	ENSMUSG00000104395	ENSMUST00000192182			Gm37957			TEC
e11ve16_cond2_309	chr1	68019789	68020186	+	22.0875	NA	Intergenic	Intergenic	-4256	ENSMUST00000124160.3	ENSMUSG00000087329	ENSMUST00000124160			Gm15671			lncRNA
e11ve16_cond2_310	chr1	69024688	69025348	+	6.93599	NA	intron (ENSMUST00000153432.1, intron 1 of 18)	protein_coding-intron (ENSMUST00000119142.7, intron 1 of 27)	81722	ENSMUST00000140116.1	ENSMUSG00000087514	ENSMUST00000140116			Gm16076			lncRNA
e11ve16_cond2_311	chr1	69059417	69060359	+	11.8773	NA	intron (ENSMUST00000153432.1, intron 1 of 18)	protein_coding-intron (ENSMUST00000119142.7, intron 1 of 27)	46852	ENSMUST00000140116.1	ENSMUSG00000087514	ENSMUST00000140116			Gm16076			lncRNA
e11ve16_cond2_312	chr1	69580419	69581066	+	17.6189	NA	intron (ENSMUST00000027146.8, intron 3 of 7)	protein_coding-intron (ENSMUST00000027146.8, intron 3 of 7)	17780	ENSMUST00000188962.1	ENSMUSG00000100815	ENSMUST00000188962			Gm29112			lncRNA
e11ve16_cond2_313	chr1	69591512	69591732	+	7.69411	NA	intron (ENSMUST00000027146.8, intron 3 of 7)	protein_coding-intron (ENSMUST00000027146.8, intron 3 of 7)	6900	ENSMUST00000188962.1	ENSMUSG00000100815	ENSMUST00000188962			Gm29112			lncRNA
e11ve16_cond2_314	chr1	69605753	69606339	+	11.0318	NA	intron (ENSMUST00000027146.8, intron 3 of 7)	protein_coding-intron (ENSMUST00000027146.8, intron 3 of 7)	-7524	ENSMUST00000188962.1	ENSMUSG00000100815	ENSMUST00000188962			Gm29112			lncRNA
e11ve16_cond2_315	chr1	69637960	69638657	+	9.68012	NA	intron (ENSMUST00000027146.8, intron 3 of 7)	protein_coding-intron (ENSMUST00000027146.8, intron 3 of 7)	23753	ENSMUST00000190898.1	ENSMUSG00000099954	ENSMUST00000190898			Gm28112			lncRNA
e11ve16_cond2_316	chr1	71102501	71103296	+	7.83164	NA	exon (ENSMUST00000027393.7, exon 1 of 11)	protein_coding-exon (ENSMUST00000027393.7, exon 1 of 11)	248	ENSMUST00000027393.7	ENSMUSG00000026196	ENSMUST00000027393			Bard1			protein_coding
e11ve16_cond2_317	chr1	71235064	71235775	+	7.22197	NA	Intergenic	Intergenic	71668	ENSMUST00000188752.1	ENSMUSG00000050296	ENSMUST00000087268			Abca12			protein_coding
e11ve16_cond2_318	chr1	71310400	71311126	+	21.1053	NA	intron (ENSMUST00000087268.6, intron 18 of 52)	protein_coding-intron (ENSMUST00000087268.6, intron 18 of 52)	-3676	ENSMUST00000188752.1	ENSMUSG00000050296	ENSMUST00000087268			Abca12			protein_coding
e11ve16_cond2_319	chr1	71384036	71384524	+	4.4644	NA	intron (ENSMUST00000189102.1, intron 2 of 2)	protein_coding-intron (ENSMUST00000087268.6, intron 2 of 52)	30616	ENSMUST00000189102.1	ENSMUSG00000050296	ENSMUST00000087268			Abca12			protein_coding
e11ve16_cond2_320	chr1	71397432	71398056	+	5.40565	NA	intron (ENSMUST00000189102.1, intron 2 of 2)	protein_coding-intron (ENSMUST00000087268.6, intron 2 of 52)	17152	ENSMUST00000189102.1	ENSMUSG00000050296	ENSMUST00000087268			Abca12			protein_coding
e11ve16_cond2_321	chr1	72382987	72383784	+	6.5114	NA	exon (ENSMUST00000027379.9, exon 18 of 21)	protein_coding-exon (ENSMUST00000027379.9, exon 18 of 21)	75958	ENSMUST00000027379.9	ENSMUSG00000026187	ENSMUST00000027379			Xrcc5			protein_coding
e11ve16_cond2_322	chr1	72599206	72600164	+	7.5153	NA	TTS (ENSMUST00000156797.7)	protein_coding-TTS (ENSMUST00000156797.7)	14047	ENSMUST00000150725.7	ENSMUSG00000039354	ENSMUST00000156797			Smarcal1			protein_coding
e11ve16_cond2_323	chr1	72912950	72913842	+	7.12333	NA	Intergenic	Intergenic	-38512	ENSMUST00000027377.8	ENSMUSG00000026185	ENSMUST00000027377			Igfbp5			protein_coding
e11ve16_cond2_324	chr1	72963460	72963670	+	3.52803	NA	Intergenic	Intergenic	-21279	ENSMUST00000188793.1	ENSMUSG00000101968	ENSMUST00000191122			1700027A15Rik			lncRNA
e11ve16_cond2_325	chr1	73153389	73153666	+	11.2486	NA	Intergenic	Intergenic	55896	ENSMUST00000194107.1	ENSMUSG00000102266	ENSMUST00000194107			Gm38106			TEC
e11ve16_cond2_326	chr1	73361976	73362482	+	9.46433	NA	Intergenic	Intergenic	-30017	ENSMUST00000183977.1	ENSMUSG00000098697	ENSMUST00000183977			Gm27315			misc_RNA
e11ve16_cond2_327	chr1	73862749	73863077	+	4.37468	NA	exon (ENSMUST00000189514.1, exon 2 of 9)	lncRNA-exon (ENSMUST00000189514.1, exon 2 of 9)	1553	ENSMUST00000189514.1	ENSMUSG00000100301	ENSMUST00000191114			6030407O03Rik			lncRNA
e11ve16_cond2_328	chr1	73935503	73935991	+	17.508	NA	intron (ENSMUST00000187584.6, intron 22 of 32)	protein_coding-intron (ENSMUST00000169786.7, intron 24 of 34)	-4936	ENSMUST00000185264.6	ENSMUSG00000055322	ENSMUST00000185702			Tns1			protein_coding
e11ve16_cond2_329	chr1	73954806	73955015	+	6.81817	NA	intron (ENSMUST00000187584.6, intron 18 of 32)	protein_coding-intron (ENSMUST00000191104.6, intron 18 of 32)	8133	ENSMUST00000191367.1	ENSMUSG00000055322	ENSMUST00000185702			Tns1			protein_coding
e11ve16_cond2_330	chr1	74008092	74009271	+	10.9114	NA	intron (ENSMUST00000187584.6, intron 4 of 32)	protein_coding-intron (ENSMUST00000169786.7, intron 4 of 34)	-7114	ENSMUST00000190389.6	ENSMUSG00000055322	ENSMUST00000185702			Tns1			protein_coding
e11ve16_cond2_331	chr1	74031716	74032240	+	4.77952	NA	intron (ENSMUST00000191204.6, intron 3 of 7)	protein_coding-intron (ENSMUST00000191204.6, intron 3 of 7)	5155	ENSMUST00000187281.6	ENSMUSG00000055322	ENSMUST00000185702			Tns1			protein_coding
e11ve16_cond2_332	chr1	74295404	74296832	+	8.49023	NA	promoter-TSS (ENSMUST00000152603.7)	protein_coding-promoter-TSS (ENSMUST00000152603.7)	-423	ENSMUST00000152603.7	ENSMUSG00000006301	ENSMUST00000141560			Tmbim1			protein_coding
e11ve16_cond2_333	chr1	74390265	74390674	+	3.98446	NA	Intergenic	Intergenic	-1040	ENSMUST00000027367.13	ENSMUSG00000026176	ENSMUST00000152659			Ctdsp1			protein_coding
e11ve16_cond2_334	chr1	75317399	75317929	+	9.01759	NA	promoter-TSS (ENSMUST00000066668.13)	protein_coding-promoter-TSS (ENSMUST00000066668.13)	-5	ENSMUST00000185797.6	ENSMUSG00000026209	ENSMUST00000186278			Dnpep			protein_coding
e11ve16_cond2_335	chr1	75478900	75479290	+	6.55325	NA	promoter-TSS (ENSMUST00000050899.6)	protein_coding-promoter-TSS (ENSMUST00000050899.6)	19	ENSMUST00000124042.1	ENSMUSG00000032997	ENSMUST00000079205			Chpf			protein_coding
e11ve16_cond2_336	chr1	76018719	76019049	+	4.43965	NA	promoter-TSS (ENSMUST00000188786.1)	lncRNA-promoter-TSS (ENSMUST00000188786.1)	-128	ENSMUST00000188786.1	ENSMUSG00000099996	ENSMUST00000188786			Gm29065			lncRNA
e11ve16_cond2_337	chr1	77695100	77695669	+	10.0384	NA	Intergenic	Intergenic	124712	ENSMUST00000185671.1	ENSMUSG00000101506	ENSMUST00000185671			Gm28385			processed_pseudogene
e11ve16_cond2_338	chr1	77801740	77802360	+	29.684	NA	Intergenic	Intergenic	96396	ENSMUST00000083281.1	ENSMUSG00000065215	ENSMUST00000083281			Gm26263			snRNA
e11ve16_cond2_339	chr1	78292207	78292904	+	11.8646	NA	Intergenic	Intergenic	-17790	ENSMUST00000036172.9	ENSMUSG00000032908	ENSMUST00000036172			Sgpp2			protein_coding
e11ve16_cond2_340	chr1	78511067	78511508	+	3.67536	NA	promoter-TSS (ENSMUST00000012331.6)	protein_coding-promoter-TSS (ENSMUST00000012331.6)	118	ENSMUST00000113524.7	ENSMUSG00000012187	ENSMUST00000012331			Mogat1			protein_coding
e11ve16_cond2_341	chr1	78819210	78820205	+	6.16683	NA	exon (ENSMUST00000057262.7, exon 2 of 2)	protein_coding-exon (ENSMUST00000057262.7, exon 2 of 2)	-1551	ENSMUST00000186681.1	ENSMUSG00000101324	ENSMUST00000186681			Gm29187			lncRNA
e11ve16_cond2_342	chr1	79655006	79655880	+	9.44781	NA	intron (ENSMUST00000162342.7, intron 1 of 4)	protein_coding-intron (ENSMUST00000159312.1, intron 1 of 4)	16522	ENSMUST00000159312.1	ENSMUSG00000054702	ENSMUST00000159312			Ap1s3			protein_coding
e11ve16_cond2_343	chr1	79711205	79711746	+	4.68173	NA	intron (ENSMUST00000113513.7, intron 8 of 11)	protein_coding-intron (ENSMUST00000113512.7, intron 8 of 11)	11181	ENSMUST00000127771.7	ENSMUSG00000073643	ENSMUST00000048820			Wdfy1			protein_coding
e11ve16_cond2_344	chr1	79746102	79746428	+	9.45633	NA	intron (ENSMUST00000113512.7, intron 1 of 11)	protein_coding-intron (ENSMUST00000048820.13, intron 1 of 4)	15456	ENSMUST00000186464.1	ENSMUSG00000073643	ENSMUST00000048820			Wdfy1			protein_coding
e11ve16_cond2_345	chr1	79824117	79824428	+	6.34694	NA	intron (ENSMUST00000190724.1, intron 1 of 4)	protein_coding-intron (ENSMUST00000027467.10, intron 1 of 8)	-2950	ENSMUST00000189793.6	ENSMUSG00000026249	ENSMUST00000153862			Serpine2			protein_coding
e11ve16_cond2_346	chr1	79832986	79833201	+	3.86268	NA	intron (ENSMUST00000190724.1, intron 1 of 4)	protein_coding-intron (ENSMUST00000027467.10, intron 1 of 8)	-11771	ENSMUST00000189793.6	ENSMUSG00000026249	ENSMUST00000153862			Serpine2			protein_coding
e11ve16_cond2_347	chr1	79921157	79921794	+	10.3579	NA	Intergenic	Intergenic	1951	ENSMUST00000165691.2	ENSMUSG00000067106	ENSMUST00000165691			Gm5529			processed_pseudogene
e11ve16_cond2_348	chr1	79932482	79933019	+	5.98566	NA	Intergenic	Intergenic	-9324	ENSMUST00000165691.2	ENSMUSG00000067106	ENSMUST00000165691			Gm5529			processed_pseudogene
e11ve16_cond2_349	chr1	80215306	80215708	+	11.1907	NA	intron (ENSMUST00000161427.1, intron 3 of 3)	protein_coding-intron (ENSMUST00000161427.1, intron 3 of 3)	-1563	ENSMUST00000058748.1	ENSMUSG00000043230	ENSMUST00000058748			Fam124b			protein_coding
e11ve16_cond2_350	chr1	80249975	80250413	+	5.5281	NA	Intergenic	Intergenic	6003	ENSMUST00000192258.1	ENSMUSG00000103404	ENSMUST00000192258			Gm37932			TEC
e11ve16_cond2_351	chr1	80340758	80341390	+	6.92624	NA	promoter-TSS (ENSMUST00000163119.7)	protein_coding-promoter-TSS (ENSMUST00000163119.7)	-594	ENSMUST00000163119.7	ENSMUSG00000004364	ENSMUST00000170897			Cul3			protein_coding
e11ve16_cond2_352	chr1	80812851	80813080	+	4.39401	NA	Intergenic	Intergenic	-54438	ENSMUST00000191505.1	ENSMUSG00000038608	ENSMUST00000191505			Dock10			protein_coding
e11ve16_cond2_353	chr1	81520311	81520650	+	5.26636	NA	exon (ENSMUST00000192484.1, exon 1 of 1)	TEC-exon (ENSMUST00000192484.1, exon 1 of 1)	1861	ENSMUST00000192484.1	ENSMUSG00000104029	ENSMUST00000192484			Gm37210			TEC
e11ve16_cond2_354	chr1	81520834	81521075	+	3.32414	NA	exon (ENSMUST00000192484.1, exon 1 of 1)	TEC-exon (ENSMUST00000192484.1, exon 1 of 1)	1387	ENSMUST00000192484.1	ENSMUSG00000104029	ENSMUST00000192484			Gm37210			TEC
e11ve16_cond2_355	chr1	81900985	81901350	+	7.01214	NA	Intergenic	Intergenic	103926	ENSMUST00000186198.1	ENSMUSG00000100561	ENSMUST00000186198			Gm7516			processed_pseudogene
e11ve16_cond2_356	chr1	82031096	82031684	+	9.46496	NA	Intergenic	Intergenic	-73790	ENSMUST00000195065.1	ENSMUSG00000103571	ENSMUST00000195065			Gm37114			TEC
e11ve16_cond2_357	chr1	82041444	82041896	+	4.58438	NA	Intergenic	Intergenic	-63510	ENSMUST00000195065.1	ENSMUSG00000103571	ENSMUST00000195065			Gm37114			TEC
e11ve16_cond2_358	chr1	82124702	82125517	+	4.77912	NA	Intergenic	Intergenic	-6807	ENSMUST00000183462.1	ENSMUSG00000098797	ENSMUST00000183462			Mir6344			miRNA
e11ve16_cond2_359	chr1	82150447	82151113	+	13.2244	NA	Intergenic	Intergenic	18864	ENSMUST00000183462.1	ENSMUSG00000098797	ENSMUST00000183462			Mir6344			miRNA
e11ve16_cond2_360	chr1	82204210	82204654	+	6.33336	NA	Intergenic	Intergenic	-28680	ENSMUST00000023262.5	ENSMUSG00000022591	ENSMUST00000023262			Gm9747			protein_coding
e11ve16_cond2_361	chr1	82291333	82291636	+	5.0508	NA	promoter-TSS (ENSMUST00000069799.2)	protein_coding-promoter-TSS (ENSMUST00000069799.2)	-68	ENSMUST00000069799.2	ENSMUSG00000055980	ENSMUST00000069799			Irs1			protein_coding
e11ve16_cond2_362	chr1	82428877	82430124	+	25.6137	NA	intron (ENSMUST00000140020.1, intron 6 of 6)	protein_coding-intron (ENSMUST00000027322.13, intron 6 of 6)	-26754	ENSMUST00000187929.1	ENSMUSG00000100786	ENSMUST00000187929			Gm28940			lncRNA
e11ve16_cond2_363	chr1	82577866	82578071	+	4.15477	NA	intron (ENSMUST00000087050.6, intron 1 of 47)	protein_coding-intron (ENSMUST00000087050.6, intron 1 of 47)	8824	ENSMUST00000135271.1	ENSMUSG00000067158	ENSMUST00000087050			Col4a4			protein_coding
e11ve16_cond2_364	chr1	82578264	82578482	+	3.86232	NA	intron (ENSMUST00000087050.6, intron 1 of 47)	protein_coding-intron (ENSMUST00000087050.6, intron 1 of 47)	8419	ENSMUST00000135271.1	ENSMUSG00000067158	ENSMUST00000087050			Col4a4			protein_coding
e11ve16_cond2_365	chr1	82586614	82587543	+	5.1445	NA	promoter-TSS (ENSMUST00000087050.6)	protein_coding-promoter-TSS (ENSMUST00000087050.6)	102	ENSMUST00000113457.8	ENSMUSG00000079465	ENSMUST00000125563			Col4a3			protein_coding
e11ve16_cond2_366	chr1	82602951	82603854	+	8.2865	NA	intron (ENSMUST00000141994.1, intron 1 of 1)	protein_coding-intron (ENSMUST00000113457.8, intron 1 of 51)	16426	ENSMUST00000113457.8	ENSMUSG00000079465	ENSMUST00000125563			Col4a3			protein_coding
e11ve16_cond2_367	chr1	82717898	82718457	+	3.96576	NA	intron (ENSMUST00000113457.8, intron 51 of 51)	protein_coding-intron (ENSMUST00000113457.8, intron 51 of 51)	2873	ENSMUST00000125563.7	ENSMUSG00000079465	ENSMUST00000125563			Col4a3			protein_coding
e11ve16_cond2_368	chr1	82783433	82783985	+	4.70055	NA	Intergenic	Intergenic	-6499	ENSMUST00000186121.1	ENSMUSG00000099771	ENSMUST00000186121			Gm19257			processed_pseudogene
e11ve16_cond2_369	chr1	83038995	83039236	+	5.47266	NA	promoter-TSS (ENSMUST00000045560.14)	protein_coding-promoter-TSS (ENSMUST00000045560.14)	-667	ENSMUST00000045560.14	ENSMUSG00000038496	ENSMUST00000142805			Slc19a3			protein_coding
e11ve16_cond2_370	chr1	83084858	83085403	+	5.8589	NA	Intergenic	Intergenic	18028	ENSMUST00000190858.1	ENSMUSG00000099691	ENSMUST00000190858			Gm29518			processed_pseudogene
e11ve16_cond2_371	chr1	83099789	83100411	+	7.3338	NA	Intergenic	Intergenic	-16666	ENSMUST00000027351.12	ENSMUSG00000026166	ENSMUST00000027351			Ccl20			protein_coding
e11ve16_cond2_372	chr1	83141648	83142691	+	33.9956	NA	Intergenic	Intergenic	-15815	ENSMUST00000186994.1	ENSMUSG00000101173	ENSMUST00000186994			Gm29519			processed_pseudogene
e11ve16_cond2_373	chr1	83345198	83346938	+	12.5954	NA	intron (ENSMUST00000160237.1, intron 2 of 2)	protein_coding-intron (ENSMUST00000053075.14, intron 3 of 9)	-13482	ENSMUST00000194004.1	ENSMUSG00000104374	ENSMUST00000194004			Gm37517			TEC
e11ve16_cond2_374	chr1	84089369	84089825	+	6.32248	NA	intron (ENSMUST00000176720.1, intron 2 of 2)	protein_coding-intron (ENSMUST00000168574.8, intron 2 of 2)	-36344	ENSMUST00000175948.1	ENSMUSG00000045658	ENSMUST00000176822			Pid1			protein_coding
e11ve16_cond2_375	chr1	84387587	84388451	+	7.92869	NA	intron (ENSMUST00000049126.12, intron 11 of 12)	protein_coding-intron (ENSMUST00000049126.12, intron 11 of 12)	7380	ENSMUST00000191700.1	ENSMUSG00000104396	ENSMUST00000191700			Gm37959			TEC
e11ve16_cond2_376	chr1	84404216	84405020	+	5.19896	NA	intron (ENSMUST00000049126.12, intron 10 of 12)	protein_coding-intron (ENSMUST00000049126.12, intron 10 of 12)	-9219	ENSMUST00000191700.1	ENSMUSG00000104396	ENSMUST00000191700			Gm37959			TEC
e11ve16_cond2_377	chr1	84405272	84406027	+	7.29754	NA	intron (ENSMUST00000049126.12, intron 10 of 12)	protein_coding-intron (ENSMUST00000049126.12, intron 10 of 12)	-10250	ENSMUST00000191700.1	ENSMUSG00000104396	ENSMUST00000191700			Gm37959			TEC
e11ve16_cond2_378	chr1	85247656	85248028	+	95.0334	NA	intron (ENSMUST00000162347.1, intron 1 of 1)	protein_coding-intron (ENSMUST00000064341.8, intron 6 of 6)	991	ENSMUST00000162347.1	ENSMUSG00000090252	ENSMUST00000162347			Gm16028			lncRNA
e11ve16_cond2_379	chr1	85287209	85287508	+	55.8052	NA	Intergenic	Intergenic	12251	ENSMUST00000159695.1	ENSMUSG00000079455	ENSMUST00000163068			Gm16026			transcribed_unprocessed_pseudogene
e11ve16_cond2_380	chr1	85585686	85586223	+	98.5976	NA	exon (ENSMUST00000128339.7, exon 3 of 7)	protein_coding-exon (ENSMUST00000128339.7, exon 3 of 7)	-1676	ENSMUST00000186740.1	ENSMUSG00000070034	ENSMUST00000128339			Sp110			protein_coding
e11ve16_cond2_381	chr1	85598483	85598770	+	118.503	NA	promoter-TSS (ENSMUST00000162784.1)	lncRNA-promoter-TSS (ENSMUST00000162784.1)	123	ENSMUST00000131950.7	ENSMUSG00000070034	ENSMUST00000128339			Sp110			protein_coding
e11ve16_cond2_382	chr1	85600221	85601080	+	237.044	NA	promoter-TSS (ENSMUST00000080204.10)	protein_coding-promoter-TSS (ENSMUST00000080204.10)	-53	ENSMUST00000080204.10	ENSMUSG00000070031	ENSMUST00000159234			Sp140			protein_coding
e11ve16_cond2_383	chr1	85624999	85625370	+	54.7348	NA	intron (ENSMUST00000080204.10, intron 7 of 16)	protein_coding-intron (ENSMUST00000080204.10, intron 7 of 16)	-7294	ENSMUST00000161497.1	ENSMUSG00000070031	ENSMUST00000159234			Sp140			protein_coding
e11ve16_cond2_384	chr1	85703400	85703823	+	8.66418	NA	intron (ENSMUST00000141709.1, intron 1 of 4)	protein_coding-intron (ENSMUST00000066427.10, intron 17 of 19)	169	ENSMUST00000141709.1	ENSMUSG00000026222	ENSMUST00000054279			Sp100			protein_coding
e11ve16_cond2_385	chr1	85824806	85825183	+	12.4962	NA	intron (ENSMUST00000113360.7, intron 2 of 8)	protein_coding-intron (ENSMUST00000097666.3, intron 3 of 9)	-18086	ENSMUST00000187623.1	ENSMUSG00000036707	ENSMUST00000113360			Cab39			protein_coding
e11ve16_cond2_386	chr1	85828997	85829282	+	11.2809	NA	intron (ENSMUST00000113360.7, intron 2 of 8)	protein_coding-intron (ENSMUST00000097666.3, intron 3 of 9)	-13941	ENSMUST00000187623.1	ENSMUSG00000036707	ENSMUST00000113360			Cab39			protein_coding
e11ve16_cond2_387	chr1	86234141	86235480	+	12.2531	NA	intron (ENSMUST00000150059.7, intron 7 of 8)	protein_coding-intron (ENSMUST00000027434.14, intron 19 of 24)	-9756	ENSMUST00000126579.1	ENSMUSG00000062590	ENSMUST00000135973			Armc9			protein_coding
e11ve16_cond2_388	chr1	86470920	86471274	+	5.177	NA	Intergenic	Intergenic	-2562	ENSMUST00000163337.3	ENSMUSG00000101328	ENSMUST00000163337			Rpl30-ps6			processed_pseudogene
e11ve16_cond2_389	chr1	86472317	86473085	+	6.64349	NA	promoter-TSS (ENSMUST00000163337.3)	processed_pseudogene-promoter-TSS (ENSMUST00000163337.3)	-958	ENSMUST00000163337.3	ENSMUSG00000101328	ENSMUST00000163337			Rpl30-ps6			processed_pseudogene
e11ve16_cond2_390	chr1	86491742	86492122	+	4.34544	NA	Intergenic	Intergenic	18273	ENSMUST00000163337.3	ENSMUSG00000101328	ENSMUST00000163337			Rpl30-ps6			processed_pseudogene
e11ve16_cond2_391	chr1	86948115	86948429	+	14.9363	NA	intron (ENSMUST00000185304.1, intron 2 of 3)	protein_coding-intron (ENSMUST00000065694.7, intron 10 of 20)	30280	ENSMUST00000195634.1	ENSMUSG00000102571	ENSMUST00000195634			Gm37967			TEC
e11ve16_cond2_392	chr1	87028974	87029176	+	9.41034	NA	intron (ENSMUST00000168237.7, intron 15 of 21)	protein_coding-intron (ENSMUST00000065694.7, intron 14 of 20)	-7648	ENSMUST00000195625.1	ENSMUSG00000103984	ENSMUST00000195625			Gm37447			TEC
e11ve16_cond2_393	chr1	87397148	87397371	+	8.45648	NA	intron (ENSMUST00000174334.7, intron 1 of 2)	protein_coding-intron (ENSMUST00000027475.14, intron 8 of 28)	-2530	ENSMUST00000113212.3	ENSMUSG00000079436	ENSMUST00000174179			Kcnj13			protein_coding
e11ve16_cond2_394	chr1	87573461	87575083	+	11.6489	NA	promoter-TSS (ENSMUST00000068681.11)	protein_coding-promoter-TSS (ENSMUST00000068681.11)	226	ENSMUST00000163606.7	ENSMUSG00000079434	ENSMUST00000163606			Neu2			protein_coding
e11ve16_cond2_395	chr1	87879056	87880456	+	11.8301	NA	promoter-TSS (ENSMUST00000190243.1)	protein_coding-promoter-TSS (ENSMUST00000190243.1)	-679	ENSMUST00000190243.1	ENSMUSG00000070738	ENSMUST00000190243			Dgkd			protein_coding
e11ve16_cond2_396	chr1	88025334	88025573	+	4.29375	NA	exon (ENSMUST00000119510.1, exon 1 of 1)	unprocessed_pseudogene-exon (ENSMUST00000119510.1, exon 1 of 1)	242	ENSMUST00000119510.1	ENSMUSG00000083478	ENSMUST00000119510			Gm15375			unprocessed_pseudogene
e11ve16_cond2_397	chr1	88103444	88104064	+	18.5087	NA	intron (ENSMUST00000113135.5, intron 1 of 5)	protein_coding-intron (ENSMUST00000058237.13, intron 1 of 4)	502	ENSMUST00000113138.7	ENSMUSG00000090145	ENSMUST00000113137			Ugt1a6b			protein_coding
e11ve16_cond2_398	chr1	88134589	88135838	+	16.3549	NA	intron (ENSMUST00000140092.7, intron 1 of 4)	protein_coding-intron (ENSMUST00000058237.13, intron 1 of 4)	331	ENSMUST00000140092.7	ENSMUSG00000054545	ENSMUST00000014263			Ugt1a6a			protein_coding
e11ve16_cond2_399	chr1	88276597	88278153	+	1661.56	NA	promoter-TSS (ENSMUST00000148138.7)	protein_coding-promoter-TSS (ENSMUST00000148138.7)	131	ENSMUST00000147393.1	ENSMUSG00000044783	ENSMUST00000054674			Hjurp			protein_coding
e11ve16_cond2_400	chr1	88437200	88438364	+	17.0931	NA	Intergenic	Intergenic	-21901	ENSMUST00000186556.1	ENSMUSG00000100908	ENSMUST00000186556			Gm28888			lncRNA
e11ve16_cond2_401	chr1	88800639	88800983	+	5.18072	NA	Intergenic	Intergenic	45857	ENSMUST00000180596.1	ENSMUSG00000097398	ENSMUST00000181016			Platr5			lncRNA
e11ve16_cond2_402	chr1	88877347	88878244	+	8.00006	NA	Intergenic	Intergenic	-2385	ENSMUST00000185425.1	ENSMUSG00000099848	ENSMUST00000185425			Gm29337			lncRNA
e11ve16_cond2_403	chr1	89104253	89104860	+	10.3944	NA	intron (ENSMUST00000066279.10, intron 1 of 5)	protein_coding-intron (ENSMUST00000066279.10, intron 1 of 5)	7483	ENSMUST00000195426.1	ENSMUSG00000102700	ENSMUST00000195426			Gm38312			TEC
e11ve16_cond2_404	chr1	89123973	89124529	+	6.00387	NA	intron (ENSMUST00000066279.10, intron 2 of 5)	protein_coding-intron (ENSMUST00000066279.10, intron 2 of 5)	27178	ENSMUST00000195426.1	ENSMUSG00000102700	ENSMUST00000195426			Gm38312			TEC
e11ve16_cond2_405	chr1	89136275	89136614	+	12.4962	NA	intron (ENSMUST00000066279.10, intron 2 of 5)	protein_coding-intron (ENSMUST00000066279.10, intron 2 of 5)	39371	ENSMUST00000195426.1	ENSMUSG00000102700	ENSMUST00000195426			Gm38312			TEC
e11ve16_cond2_406	chr1	89676626	89676949	+	7.4812	NA	TTS (ENSMUST00000187295.1)	lncRNA-TTS (ENSMUST00000187295.1)	7101	ENSMUST00000187011.1	ENSMUSG00000102009	ENSMUST00000186098			4933400F21Rik			lncRNA
e11ve16_cond2_407	chr1	89716132	89716640	+	4.69524	NA	intron (ENSMUST00000190096.6, intron 9 of 16)	protein_coding-intron (ENSMUST00000027521.14, intron 9 of 17)	31584	ENSMUST00000158150.1	ENSMUSG00000088775	ENSMUST00000158150			Gm26037			misc_RNA
e11ve16_cond2_408	chr1	90279224	90279452	+	4.56509	NA	Intergenic	Intergenic	-1120	ENSMUST00000188640.1	ENSMUSG00000101028	ENSMUST00000188640			Gm28723			lncRNA
e11ve16_cond2_409	chr1	90896757	90897337	+	14.7186	NA	Intergenic	Intergenic	-18038	ENSMUST00000027528.6	ENSMUSG00000026303	ENSMUST00000136220			Mlph			protein_coding
e11ve16_cond2_410	chr1	90914796	90915594	+	16.6985	NA	exon (ENSMUST00000027528.6, exon 1 of 16)	protein_coding-exon (ENSMUST00000027528.6, exon 1 of 16)	110	ENSMUST00000027528.6	ENSMUSG00000026303	ENSMUST00000136220			Mlph			protein_coding
e11ve16_cond2_411	chr1	90927276	90927634	+	5.13254	NA	promoter-TSS (ENSMUST00000125149.1)	protein_coding-promoter-TSS (ENSMUST00000125149.1)	-224	ENSMUST00000125149.1	ENSMUSG00000026303	ENSMUST00000136220			Mlph			protein_coding
e11ve16_cond2_412	chr1	90969706	90970115	+	6.1748	NA	promoter-TSS (ENSMUST00000027529.11)	protein_coding-promoter-TSS (ENSMUST00000027529.11)	-249	ENSMUST00000027529.11	ENSMUSG00000026304	ENSMUST00000027529			Rab17			protein_coding
e11ve16_cond2_413	chr1	91044381	91044791	+	5.11323	NA	intron (ENSMUST00000189505.6, intron 1 of 12)	protein_coding-intron (ENSMUST00000068116.12, intron 1 of 12)	-8858	ENSMUST00000068167.12	ENSMUSG00000026305	ENSMUST00000097650			Lrrfip1			protein_coding
e11ve16_cond2_414	chr1	91054412	91054728	+	3.27669	NA	intron (ENSMUST00000097649.9, intron 1 of 7)	protein_coding-intron (ENSMUST00000068116.12, intron 1 of 12)	984	ENSMUST00000189617.2	ENSMUSG00000026305	ENSMUST00000097650			Lrrfip1			protein_coding
e11ve16_cond2_415	chr1	91055011	91055260	+	5.22155	NA	intron (ENSMUST00000097649.9, intron 1 of 7)	protein_coding-intron (ENSMUST00000068116.12, intron 1 of 12)	1549	ENSMUST00000189617.2	ENSMUSG00000026305	ENSMUST00000097650			Lrrfip1			protein_coding
e11ve16_cond2_416	chr1	91405203	91406035	+	6.8804	NA	intron (ENSMUST00000188956.1, intron 1 of 2)	lncRNA-intron (ENSMUST00000188956.1, intron 1 of 2)	410	ENSMUST00000188956.1	ENSMUSG00000100253	ENSMUST00000188956			1700020N18Rik			lncRNA
e11ve16_cond2_417	chr1	91436260	91437011	+	12.0908	NA	intron (ENSMUST00000069620.9, intron 9 of 22)	protein_coding-intron (ENSMUST00000069620.9, intron 9 of 22)	13230	ENSMUST00000185298.1	ENSMUSG00000055866	ENSMUST00000185298			Per2			protein_coding
e11ve16_cond2_418	chr1	91458229	91458588	+	6.19973	NA	intron (ENSMUST00000069620.9, intron 1 of 22)	protein_coding-intron (ENSMUST00000069620.9, intron 1 of 22)	916	ENSMUST00000069620.9	ENSMUSG00000055866	ENSMUST00000185298			Per2			protein_coding
e11ve16_cond2_419	chr1	91611190	91611516	+	4.34827	NA	promoter-TSS (ENSMUST00000188800.1)	lncRNA-promoter-TSS (ENSMUST00000188800.1)	-53	ENSMUST00000188800.1	ENSMUSG00000101705	ENSMUST00000188800			Gm28380			lncRNA
e11ve16_cond2_420	chr1	91732525	91733089	+	10.5486	NA	Intergenic	Intergenic	-68654	ENSMUST00000007949.3	ENSMUSG00000007805	ENSMUST00000186075			Twist2			protein_coding
e11ve16_cond2_421	chr1	91771145	91771454	+	11.975	NA	Intergenic	Intergenic	-30162	ENSMUST00000007949.3	ENSMUSG00000007805	ENSMUST00000186075			Twist2			protein_coding
e11ve16_cond2_422	chr1	91845479	91845738	+	4.80964	NA	intron (ENSMUST00000007949.3, intron 1 of 1)	protein_coding-intron (ENSMUST00000007949.3, intron 1 of 1)	23093	ENSMUST00000188329.1	ENSMUSG00000101414	ENSMUST00000188329			Gm29101			lncRNA
e11ve16_cond2_423	chr1	91928279	91929409	+	12.3148	NA	TTS (ENSMUST00000097644.8)	protein_coding-TTS (ENSMUST00000097644.8)	6020	ENSMUST00000191327.1	ENSMUSG00000026313	ENSMUST00000008995			Hdac4			protein_coding
e11ve16_cond2_424	chr1	91933549	91933857	+	6.98282	NA	exon (ENSMUST00000008995.14, exon 25 of 26)	protein_coding-exon (ENSMUST00000008995.14, exon 25 of 26)	1161	ENSMUST00000191327.1	ENSMUSG00000026313	ENSMUST00000008995			Hdac4			protein_coding
e11ve16_cond2_425	chr1	92437782	92438364	+	5.53486	NA	TTS (ENSMUST00000027478.6)	protein_coding-TTS (ENSMUST00000027478.6)	-7541	ENSMUST00000190873.1	ENSMUSG00000101522	ENSMUST00000190873			Gm7837			processed_pseudogene
e11ve16_cond2_426	chr1	92972885	92973474	+	8.69987	NA	promoter-TSS (ENSMUST00000027489.8)	protein_coding-promoter-TSS (ENSMUST00000027489.8)	57	ENSMUST00000186298.6	ENSMUSG00000026271	ENSMUST00000185421			Gpr35			protein_coding
e11ve16_cond2_427	chr1	93063368	93064474	+	19.9442	NA	intron (ENSMUST00000171796.7, intron 14 of 47)	protein_coding-intron (ENSMUST00000086819.11, intron 14 of 46)	4837	ENSMUST00000190249.1	ENSMUSG00000014602	ENSMUST00000188136			Kif1a			protein_coding
e11ve16_cond2_428	chr1	93159865	93162406	+	12.4892	NA	promoter-TSS (ENSMUST00000043718.11)	protein_coding-promoter-TSS (ENSMUST00000043718.11)	-187	ENSMUST00000043718.11	ENSMUSG00000034159	ENSMUST00000143419			Mab21l4			protein_coding
e11ve16_cond2_429	chr1	93210057	93210548	+	4.53131	NA	intron (ENSMUST00000138595.2, intron 21 of 31)	protein_coding-intron (ENSMUST00000138595.2, intron 21 of 31)	-25539	ENSMUST00000062202.13	ENSMUSG00000047793	ENSMUST00000165883			Sned1			protein_coding
e11ve16_cond2_430	chr1	93217174	93217388	+	6.39256	NA	intron (ENSMUST00000138595.2, intron 27 of 31)	protein_coding-intron (ENSMUST00000138595.2, intron 27 of 31)	-18560	ENSMUST00000062202.13	ENSMUSG00000047793	ENSMUST00000165883			Sned1			protein_coding
e11ve16_cond2_431	chr1	93511837	93512103	+	5.86617	NA	promoter-TSS (ENSMUST00000120301.7)	protein_coding-promoter-TSS (ENSMUST00000120301.7)	-109	ENSMUST00000120301.7	ENSMUSG00000034066	ENSMUST00000122402			Farp2			protein_coding
e11ve16_cond2_432	chr1	93635226	93635876	+	4.67129	NA	promoter-TSS (ENSMUST00000133769.7)	protein_coding-promoter-TSS (ENSMUST00000133769.7)	-72	ENSMUST00000133769.7	ENSMUSG00000026277	ENSMUST00000125778			Stk25			protein_coding
e11ve16_cond2_433	chr1	93803776	93804235	+	5.79668	NA	promoter-TSS (ENSMUST00000027505.12)	protein_coding-promoter-TSS (ENSMUST00000027505.12)	22	ENSMUST00000188402.1	ENSMUSG00000026283	ENSMUST00000027505			Ing5			protein_coding
e11ve16_cond2_434	chr1	95313412	95314324	+	9.94367	NA	exon (ENSMUST00000059975.7, exon 1 of 3)	protein_coding-exon (ENSMUST00000059975.7, exon 1 of 3)	240	ENSMUST00000186780.1	ENSMUSG00000051185	ENSMUST00000186780			Fam174a			protein_coding
e11ve16_cond2_435	chr1	96865256	96865581	+	17.6323	NA	intron (ENSMUST00000071985.5, intron 2 of 12)	protein_coding-intron (ENSMUST00000071985.5, intron 2 of 12)	-5708	ENSMUST00000188631.4	ENSMUSG00000097814	ENSMUST00000202118			Panct2			lncRNA
e11ve16_cond2_436	chr1	96868525	96869232	+	45.8939	NA	intron (ENSMUST00000071985.5, intron 1 of 12)	protein_coding-intron (ENSMUST00000071985.5, intron 1 of 12)	-2248	ENSMUST00000188631.4	ENSMUSG00000097814	ENSMUST00000202118			Panct2			lncRNA
e11ve16_cond2_437	chr1	96871585	96872674	+	4.80388	NA	promoter-TSS (ENSMUST00000071985.5)	protein_coding-promoter-TSS (ENSMUST00000071985.5)	42	ENSMUST00000071985.5	ENSMUSG00000040693	ENSMUST00000071985			Slco4c1			protein_coding
e11ve16_cond2_438	chr1	96884001	96884339	+	3.48003	NA	intron (ENSMUST00000188631.4, intron 3 of 3)	lncRNA-intron (ENSMUST00000188631.4, intron 3 of 3)	11937	ENSMUST00000202118.1	ENSMUSG00000097814	ENSMUST00000202118			Panct2			lncRNA
e11ve16_cond2_439	chr1	96970257	96971030	+	22.3215	NA	intron (ENSMUST00000178359.2, intron 4 of 11)	transcribed_unprocessed_pseudogene-intron (ENSMUST00000167383.7, intron 4 of 14)	26594	ENSMUST00000178359.2	ENSMUSG00000045463	ENSMUST00000167383			Slco6b1			transcribed_unprocessed_pseudogene
e11ve16_cond2_440	chr1	97661452	97662087	+	12.595	NA	promoter-TSS (ENSMUST00000142234.1)	protein_coding-promoter-TSS (ENSMUST00000142234.1)	-93	ENSMUST00000142234.1	ENSMUSG00000044768	ENSMUST00000153115			D1Ertd622e			protein_coding
e11ve16_cond2_441	chr1	97770180	97770519	+	3.91314	NA	promoter-TSS (ENSMUST00000042509.12)	protein_coding-promoter-TSS (ENSMUST00000042509.12)	62	ENSMUST00000112845.7	ENSMUSG00000040648	ENSMUST00000112845			Ppip5k2			protein_coding
e11ve16_cond2_442	chr1	97963662	97964132	+	8.97087	NA	intron (ENSMUST00000162426.1, intron 2 of 2)	protein_coding-intron (ENSMUST00000162426.1, intron 2 of 2)	13171	ENSMUST00000159428.7	ENSMUSG00000026335	ENSMUST00000159131			Pam			protein_coding
e11ve16_cond2_443	chr1	97998813	97999767	+	11.3804	NA	intron (ENSMUST00000097625.9, intron 1 of 25)	protein_coding-intron (ENSMUST00000058762.14, intron 1 of 25)	-22035	ENSMUST00000161567.7	ENSMUSG00000026335	ENSMUST00000159131			Pam			protein_coding
e11ve16_cond2_444	chr1	100878331	100878738	+	4.50177	NA	Intergenic	Intergenic	16741	ENSMUST00000103851.1	ENSMUSG00000077039	ENSMUST00000103851			Gm25537			miRNA
e11ve16_cond2_445	chr1	105187862	105189280	+	14.3326	NA	Intergenic	Intergenic	-55854	ENSMUST00000187431.1	ENSMUSG00000099702	ENSMUST00000187431			Gm29013			unprocessed_pseudogene
e11ve16_cond2_446	chr1	105770551	105771312	+	16.2792	NA	Intergenic	Intergenic	6487	ENSMUST00000188288.1	ENSMUSG00000101330	ENSMUST00000188288			Gm10193			processed_pseudogene
e11ve16_cond2_447	chr1	105776676	105776887	+	14.3791	NA	Intergenic	Intergenic	-3937	ENSMUST00000027559.7	ENSMUSG00000026321	ENSMUST00000187812			Tnfrsf11a			protein_coding
e11ve16_cond2_448	chr1	105786382	105787655	+	7.24686	NA	intron (ENSMUST00000187812.1, intron 1 of 3)	protein_coding-intron (ENSMUST00000027559.7, intron 1 of 9)	6268	ENSMUST00000187812.1	ENSMUSG00000026321	ENSMUST00000187812			Tnfrsf11a			protein_coding
e11ve16_cond2_449	chr1	105925501	105925725	+	3.22983	NA	Intergenic	Intergenic	-19941	ENSMUST00000158581.1	ENSMUSG00000089206	ENSMUST00000158581			Gm26214			snRNA
e11ve16_cond2_450	chr1	105990264	105990487	+	4.95362	NA	promoter-TSS (ENSMUST00000118196.7)	protein_coding-promoter-TSS (ENSMUST00000118196.7)	-31	ENSMUST00000118196.7	ENSMUSG00000038866	ENSMUST00000118196			Zcchc2			protein_coding
e11ve16_cond2_451	chr1	106171366	106171697	+	7.82072	NA	promoter-TSS (ENSMUST00000061047.6)	protein_coding-promoter-TSS (ENSMUST00000061047.6)	-7	ENSMUST00000190105.1	ENSMUSG00000101583	ENSMUST00000190105			Gm20753			lncRNA
e11ve16_cond2_452	chr1	106237054	106237258	+	4.82803	NA	intron (ENSMUST00000061047.6, intron 1 of 16)	protein_coding-intron (ENSMUST00000061047.6, intron 1 of 16)	17842	ENSMUST00000194600.1	ENSMUSG00000103291	ENSMUST00000194600			Gm38235			TEC
e11ve16_cond2_453	chr1	106407816	106408306	+	4.61639	NA	Intergenic	Intergenic	-6074	ENSMUST00000187918.1	ENSMUSG00000100247	ENSMUST00000187918			A530053M12Rik			lncRNA
e11ve16_cond2_454	chr1	106759329	106760014	+	7.04726	NA	promoter-TSS (ENSMUST00000010049.5)	protein_coding-promoter-TSS (ENSMUST00000010049.5)	12	ENSMUST00000187617.1	ENSMUSG00000009905	ENSMUST00000010049			Kdsr			protein_coding
e11ve16_cond2_455	chr1	107000357	107001274	+	9.25617	NA	TTS (ENSMUST00000136766.1)	protein_coding-TTS (ENSMUST00000136766.1)	19821	ENSMUST00000136766.1	ENSMUSG00000048775	ENSMUST00000136766			Serpinb13			protein_coding
e11ve16_cond2_456	chr1	107589792	107590655	+	8.17932	NA	exon (ENSMUST00000000514.10, exon 1 of 7)	protein_coding-exon (ENSMUST00000000514.10, exon 1 of 7)	177	ENSMUST00000151283.1	ENSMUSG00000026315	ENSMUST00000000514			Serpinb8			protein_coding
e11ve16_cond2_457	chr1	108178261	108178570	+	5.24665	NA	Intergenic	Intergenic	201023	ENSMUST00000185629.1	ENSMUSG00000100041	ENSMUST00000185629			Gm5702			processed_pseudogene
e11ve16_cond2_458	chr1	108670698	108671654	+	6.85535	NA	Intergenic	Intergenic	-58662	ENSMUST00000185509.1	ENSMUSG00000101231	ENSMUST00000185509			Gm28283			processed_pseudogene
e11ve16_cond2_459	chr1	111864451	111865112	+	22.222	NA	promoter-TSS (ENSMUST00000186365.1)	protein_coding-promoter-TSS (ENSMUST00000186365.1)	-13	ENSMUST00000186365.1	ENSMUSG00000038702	ENSMUST00000035462			Dsel			protein_coding
e11ve16_cond2_460	chr1	112384125	112384692	+	5.18762	NA	Intergenic	Intergenic	20447	ENSMUST00000185872.1	ENSMUSG00000101054	ENSMUST00000185872			Gm18406			processed_pseudogene
e11ve16_cond2_461	chr1	113543702	113543927	+	4.00155	NA	Intergenic	Intergenic	22169	ENSMUST00000186856.1	ENSMUSG00000102105	ENSMUST00000186856			Gm17946			processed_pseudogene
e11ve16_cond2_462	chr1	118294734	118295257	+	5.95678	NA	exon (ENSMUST00000027623.8, exon 6 of 6)	protein_coding-exon (ENSMUST00000027623.8, exon 6 of 6)	14991	ENSMUST00000188512.6	ENSMUSG00000026374	ENSMUST00000027623			Tsn			protein_coding
e11ve16_cond2_463	chr1	118296277	118297272	+	24.0819	NA	exon (ENSMUST00000027623.8, exon 6 of 6)	protein_coding-exon (ENSMUST00000027623.8, exon 6 of 6)	13212	ENSMUST00000188512.6	ENSMUSG00000026374	ENSMUST00000027623			Tsn			protein_coding
e11ve16_cond2_464	chr1	118459061	118459606	+	4.65159	NA	promoter-TSS (ENSMUST00000116892.1)	snRNA-promoter-TSS (ENSMUST00000116892.1)	-66	ENSMUST00000203191.1	ENSMUSG00000107722	ENSMUST00000203191			2900060B14Rik			lncRNA
e11ve16_cond2_465	chr1	118642974	118643809	+	5.13769	NA	intron (ENSMUST00000027629.9, intron 2 of 14)	protein_coding-intron (ENSMUST00000027629.9, intron 2 of 14)	-4987	ENSMUST00000158976.1	ENSMUSG00000089601	ENSMUST00000158976			Gm22094			rRNA
e11ve16_cond2_466	chr1	118649735	118650727	+	8.46015	NA	intron (ENSMUST00000027629.9, intron 2 of 14)	protein_coding-intron (ENSMUST00000027629.9, intron 2 of 14)	1564	ENSMUST00000185504.1	ENSMUSG00000101624	ENSMUST00000185504			Gm28882			processed_pseudogene
e11ve16_cond2_467	chr1	118689731	118690289	+	9.44738	NA	Intergenic	Intergenic	8189	ENSMUST00000157738.1	ENSMUSG00000088363	ENSMUST00000157738			Gm23497			snRNA
e11ve16_cond2_468	chr1	118698017	118698278	+	6.43028	NA	Intergenic	Intergenic	16326	ENSMUST00000157738.1	ENSMUSG00000088363	ENSMUST00000157738			Gm23497			snRNA
e11ve16_cond2_469	chr1	118711573	118712217	+	13.992	NA	Intergenic	Intergenic	30074	ENSMUST00000157738.1	ENSMUSG00000088363	ENSMUST00000157738			Gm23497			snRNA
e11ve16_cond2_470	chr1	118905148	118905947	+	6.68918	NA	intron (ENSMUST00000159839.7, intron 2 of 6)	protein_coding-intron (ENSMUST00000062483.14, intron 2 of 13)	-48673	ENSMUST00000183982.1	ENSMUSG00000098273	ENSMUST00000183982			Mir6346			miRNA
e11ve16_cond2_471	chr1	118982374	118982784	+	4.03151	NA	promoter-TSS (ENSMUST00000159678.2)	protein_coding-promoter-TSS (ENSMUST00000159678.2)	9	ENSMUST00000159678.2	ENSMUSG00000048402	ENSMUST00000159678			Gli2			protein_coding
e11ve16_cond2_472	chr1	119290743	119291130	+	6.02887	NA	Intergenic	Intergenic	35897	ENSMUST00000189894.1	ENSMUSG00000099860	ENSMUST00000189894			Gm29456			lncRNA
e11ve16_cond2_473	chr1	119293877	119294089	+	12.5352	NA	Intergenic	Intergenic	32850	ENSMUST00000189894.1	ENSMUSG00000099860	ENSMUST00000189894			Gm29456			lncRNA
e11ve16_cond2_474	chr1	119309038	119309245	+	4.70181	NA	intron (ENSMUST00000189894.1, intron 3 of 3)	lncRNA-intron (ENSMUST00000189894.1, intron 3 of 3)	17692	ENSMUST00000189894.1	ENSMUSG00000099860	ENSMUST00000189894			Gm29456			lncRNA
e11ve16_cond2_475	chr1	119321815	119322356	+	5.60734	NA	intron (ENSMUST00000189894.1, intron 1 of 3)	lncRNA-intron (ENSMUST00000189894.1, intron 1 of 3)	4748	ENSMUST00000189894.1	ENSMUSG00000099860	ENSMUST00000189894			Gm29456			lncRNA
e11ve16_cond2_476	chr1	119492020	119492457	+	5.14106	NA	intron (ENSMUST00000004565.14, intron 1 of 4)	protein_coding-intron (ENSMUST00000004565.14, intron 1 of 4)	-7239	ENSMUST00000190805.1	ENSMUSG00000101437	ENSMUST00000190805			Gm29454			processed_pseudogene
e11ve16_cond2_477	chr1	119504031	119504247	+	4.13555	NA	intron (ENSMUST00000004565.14, intron 1 of 4)	protein_coding-intron (ENSMUST00000004565.14, intron 1 of 4)	655	ENSMUST00000156213.1	ENSMUSG00000004451	ENSMUST00000142945			Ralb			protein_coding
e11ve16_cond2_478	chr1	119504569	119504979	+	5.99366	NA	promoter-TSS (ENSMUST00000004565.14)	protein_coding-promoter-TSS (ENSMUST00000004565.14)	20	ENSMUST00000156213.1	ENSMUSG00000004451	ENSMUST00000142945			Ralb			protein_coding
e11ve16_cond2_479	chr1	119525016	119525707	+	6.37273	NA	promoter-TSS (ENSMUST00000183607.1)	protein_coding-promoter-TSS (ENSMUST00000183607.1)	-799	ENSMUST00000183952.1	ENSMUSG00000098923	ENSMUST00000183952			Tmem185b			protein_coding
e11ve16_cond2_480	chr1	119624997	119625258	+	4.51773	NA	intron (ENSMUST00000027632.13, intron 3 of 16)	protein_coding-intron (ENSMUST00000027632.13, intron 3 of 16)	6542	ENSMUST00000192036.1	ENSMUSG00000102687	ENSMUST00000192036			Gm37219			TEC
e11ve16_cond2_481	chr1	119641223	119641526	+	3.79836	NA	intron (ENSMUST00000187194.1, intron 2 of 4)	protein_coding-intron (ENSMUST00000027632.13, intron 2 of 16)	7243	ENSMUST00000027632.13	ENSMUSG00000026383	ENSMUST00000027632			Epb41l5			protein_coding
e11ve16_cond2_482	chr1	119889585	119889838	+	3.85563	NA	Intergenic	Intergenic	-7750	ENSMUST00000190750.1	ENSMUSG00000100636	ENSMUST00000190750			Gm3551			processed_pseudogene
e11ve16_cond2_483	chr1	120027554	120028226	+	16.5129	NA	intron (ENSMUST00000072886.10, intron 3 of 13)	protein_coding-intron (ENSMUST00000072886.10, intron 3 of 13)	20856	ENSMUST00000189037.1	ENSMUSG00000026387	ENSMUST00000072886			Sctr			protein_coding
e11ve16_cond2_484	chr1	120082813	120083360	+	11.9226	NA	Intergenic	Intergenic	-9012	ENSMUST00000056089.7	ENSMUSG00000050777	ENSMUST00000056089			Tmem37			protein_coding
e11ve16_cond2_485	chr1	120105254	120106229	+	32.8849	NA	Intergenic	Intergenic	14397	ENSMUST00000112648.7	ENSMUSG00000026385	ENSMUST00000132118			Dbi			protein_coding
e11ve16_cond2_486	chr1	120115571	120116191	+	20.0044	NA	TTS (ENSMUST00000135937.1)	protein_coding-TTS (ENSMUST00000135937.1)	4257	ENSMUST00000112648.7	ENSMUSG00000026385	ENSMUST00000132118			Dbi			protein_coding
e11ve16_cond2_487	chr1	120264817	120265323	+	5.4897	NA	intron (ENSMUST00000112643.1, intron 2 of 5)	protein_coding-intron (ENSMUST00000112639.7, intron 1 of 4)	185	ENSMUST00000140490.7	ENSMUSG00000026389	ENSMUST00000112640			Steap3			protein_coding
e11ve16_cond2_488	chr1	120356840	120357675	+	5.40656	NA	Intergenic	Intergenic	16675	ENSMUST00000037286.9	ENSMUSG00000036907	ENSMUST00000037286			C1ql2			protein_coding
e11ve16_cond2_489	chr1	121327445	121328399	+	6.01373	NA	promoter-TSS (ENSMUST00000159085.7)	protein_coding-promoter-TSS (ENSMUST00000159085.7)	102	ENSMUST00000003818.13	ENSMUSG00000003721	ENSMUST00000003818			Insig2			protein_coding
e11ve16_cond2_490	chr1	123179800	123180062	+	3.241	NA	Intergenic	Intergenic	-25218	ENSMUST00000188837.1	ENSMUSG00000100405	ENSMUST00000188837			Gm28911			processed_pseudogene
e11ve16_cond2_491	chr1	125525831	125526393	+	6.58264	NA	Intergenic	Intergenic	-34483	ENSMUST00000190037.6	ENSMUSG00000026342	ENSMUST00000190037			Slc35f5			protein_coding
e11ve16_cond2_492	chr1	125533020	125533401	+	5.97517	NA	Intergenic	Intergenic	-27385	ENSMUST00000190037.6	ENSMUSG00000026342	ENSMUST00000190037			Slc35f5			protein_coding
e11ve16_cond2_493	chr1	125687888	125688511	+	9.47566	NA	intron (ENSMUST00000027581.6, intron 1 of 1)	protein_coding-intron (ENSMUST00000027581.6, intron 1 of 1)	11204	ENSMUST00000027581.6	ENSMUSG00000026343	ENSMUST00000027581			Gpr39			protein_coding
e11ve16_cond2_494	chr1	125759845	125760390	+	10.4695	NA	intron (ENSMUST00000027581.6, intron 1 of 1)	protein_coding-intron (ENSMUST00000027581.6, intron 1 of 1)	-79886	ENSMUST00000159359.1	ENSMUSG00000026343	ENSMUST00000027581			Gpr39			protein_coding
e11ve16_cond2_495	chr1	125814729	125815488	+	5.20943	NA	intron (ENSMUST00000027581.6, intron 1 of 1)	protein_coding-intron (ENSMUST00000027581.6, intron 1 of 1)	-24895	ENSMUST00000159359.1	ENSMUSG00000026343	ENSMUST00000027581			Gpr39			protein_coding
e11ve16_cond2_496	chr1	126190504	126190755	+	5.92178	NA	intron (ENSMUST00000094609.9, intron 7 of 12)	protein_coding-intron (ENSMUST00000057846.14, intron 4 of 12)	-119168	ENSMUST00000194647.1	ENSMUSG00000102723	ENSMUST00000194647			Gm37936			TEC
e11ve16_cond2_497	chr1	126568606	126569016	+	6.73824	NA	intron (ENSMUST00000162647.1, intron 2 of 2)	protein_coding-intron (ENSMUST00000094609.9, intron 2 of 12)	-75884	ENSMUST00000161954.7	ENSMUSG00000049690	ENSMUST00000160693			Nckap5			protein_coding
e11ve16_cond2_498	chr1	126683133	126684276	+	6.88682	NA	intron (ENSMUST00000162647.1, intron 2 of 2)	protein_coding-intron (ENSMUST00000094609.9, intron 2 of 12)	54486	ENSMUST00000162664.7	ENSMUSG00000049690	ENSMUST00000160693			Nckap5			protein_coding
e11ve16_cond2_499	chr1	126911378	126911696	+	4.41341	NA	Intergenic	Intergenic	-34922	ENSMUST00000188266.1	ENSMUSG00000101600	ENSMUST00000188266			4930599A14Rik			lncRNA
e11ve16_cond2_500	chr1	127437302	127437586	+	9.01278	NA	intron (ENSMUST00000171405.1, intron 10 of 15)	protein_coding-intron (ENSMUST00000038361.10, intron 12 of 17)	30668	ENSMUST00000195573.1	ENSMUSG00000103390	ENSMUST00000195573			Gm38301			TEC
e11ve16_cond2_501	chr1	127586290	127586938	+	17.7094	NA	intron (ENSMUST00000160616.7, intron 2 of 8)	protein_coding-intron (ENSMUST00000027585.13, intron 2 of 8)	-49184	ENSMUST00000162406.1	ENSMUSG00000026347	ENSMUST00000160111			Tmem163			protein_coding
e11ve16_cond2_502	chr1	127626764	127627741	+	20.5752	NA	intron (ENSMUST00000160616.7, intron 2 of 8)	protein_coding-intron (ENSMUST00000027585.13, intron 2 of 8)	50769	ENSMUST00000160616.7	ENSMUSG00000026347	ENSMUST00000160111			Tmem163			protein_coding
e11ve16_cond2_503	chr1	128103081	128103341	+	4.01052	NA	promoter-TSS (ENSMUST00000036288.10)	protein_coding-promoter-TSS (ENSMUST00000036288.10)	-90	ENSMUST00000191016.6	ENSMUSG00000056211	ENSMUST00000191016			R3hdm1			protein_coding
e11ve16_cond2_504	chr1	128535219	128536179	+	9.31537	NA	Intergenic	Intergenic	-14239	ENSMUST00000187672.1	ENSMUSG00000100078	ENSMUST00000187672			Gm6170			processed_pseudogene
e11ve16_cond2_505	chr1	128614820	128615666	+	8.83438	NA	Intergenic	Intergenic	-22950	ENSMUST00000142893.1	ENSMUSG00000045382	ENSMUST00000052172			Cxcr4			protein_coding
e11ve16_cond2_506	chr1	129792164	129792454	+	6.78069	NA	intron (ENSMUST00000073527.12, intron 10 of 27)	protein_coding-intron (ENSMUST00000040311.13, intron 10 of 15)	5549	ENSMUST00000161109.1	ENSMUSG00000089648	ENSMUST00000161109			Gm15790			processed_pseudogene
e11ve16_cond2_507	chr1	130422034	130423059	+	7.91757	NA	promoter-TSS (ENSMUST00000143266.1)	lncRNA-promoter-TSS (ENSMUST00000143266.1)	194	ENSMUST00000136497.1	ENSMUSG00000026401	ENSMUST00000119432			Cd55b			protein_coding
e11ve16_cond2_508	chr1	130462231	130462836	+	4.61432	NA	promoter-TSS (ENSMUST00000125681.1)	lncRNA-promoter-TSS (ENSMUST00000125681.1)	-43	ENSMUST00000125681.1	ENSMUSG00000085526	ENSMUST00000125681			Gm16083			lncRNA
e11ve16_cond2_509	chr1	130474160	130474680	+	9.45168	NA	exon (ENSMUST00000193111.1, exon 1 of 1)	TEC-exon (ENSMUST00000193111.1, exon 1 of 1)	677	ENSMUST00000193111.1	ENSMUSG00000103751	ENSMUST00000193111			Gm37283			TEC
e11ve16_cond2_510	chr1	130508833	130509290	+	7.04698	NA	intron (ENSMUST00000125681.1, intron 1 of 4)	lncRNA-intron (ENSMUST00000125681.1, intron 1 of 4)	35318	ENSMUST00000193111.1	ENSMUSG00000103751	ENSMUST00000193111			Gm37283			TEC
e11ve16_cond2_511	chr1	130715566	130715994	+	10.4689	NA	promoter-TSS (ENSMUST00000066863.12)	protein_coding-promoter-TSS (ENSMUST00000066863.12)	-2	ENSMUST00000169659.7	ENSMUSG00000026409	ENSMUST00000191301			Pfkfb2			protein_coding
e11ve16_cond2_512	chr1	130733467	130734402	+	7.40469	NA	intron (ENSMUST00000186185.1, intron 1 of 2)	protein_coding-intron (ENSMUST00000039323.7, intron 1 of 3)	1824	ENSMUST00000186185.1	ENSMUSG00000042510	ENSMUST00000190859			AA986860			protein_coding
e11ve16_cond2_513	chr1	130740348	130740859	+	6.38465	NA	exon (ENSMUST00000190859.1, exon 1 of 2)	protein_coding-exon (ENSMUST00000190859.1, exon 1 of 2)	331	ENSMUST00000190859.1	ENSMUSG00000042510	ENSMUST00000190859			AA986860			protein_coding
e11ve16_cond2_514	chr1	130763895	130764618	+	8.69746	NA	Intergenic	Intergenic	-2128	ENSMUST00000189150.1	ENSMUSG00000100106	ENSMUST00000189150			Gm28856			lncRNA
e11ve16_cond2_515	chr1	130770074	130770806	+	12.0207	NA	intron (ENSMUST00000189150.1, intron 2 of 3)	lncRNA-intron (ENSMUST00000189150.1, intron 2 of 3)	4056	ENSMUST00000189150.1	ENSMUSG00000100106	ENSMUST00000189150			Gm28856			lncRNA
e11ve16_cond2_516	chr1	130820483	130820686	+	4.09817	NA	promoter-TSS (ENSMUST00000122968.1)	lncRNA-promoter-TSS (ENSMUST00000122968.1)	90	ENSMUST00000122968.1	ENSMUSG00000086706	ENSMUST00000125056			Gm15848			lncRNA
e11ve16_cond2_517	chr1	131116489	131116789	+	7.36131	NA	Intergenic	Intergenic	-13894	ENSMUST00000158631.1	ENSMUSG00000089256	ENSMUST00000158631			Gm25717			misc_RNA
e11ve16_cond2_518	chr1	131118608	131119261	+	17.0736	NA	Intergenic	Intergenic	-16189	ENSMUST00000158631.1	ENSMUSG00000089256	ENSMUST00000158631			Gm25717			misc_RNA
e11ve16_cond2_519	chr1	131246602	131247077	+	9.40954	NA	Intergenic	Intergenic	-1581	ENSMUST00000112442.1	ENSMUSG00000026430	ENSMUST00000112442			Rassf5			protein_coding
e11ve16_cond2_520	chr1	131344930	131346460	+	15.5714	NA	intron (ENSMUST00000186543.6, intron 9 of 21)	protein_coding-intron (ENSMUST00000097588.8, intron 9 of 22)	-1148	ENSMUST00000188770.6	ENSMUSG00000026425	ENSMUST00000187042			Srgap2			protein_coding
e11ve16_cond2_521	chr1	131527414	131527655	+	3.86085	NA	promoter-TSS (ENSMUST00000068613.4)	protein_coding-promoter-TSS (ENSMUST00000068613.4)	-182	ENSMUST00000189893.6	ENSMUSG00000026425	ENSMUST00000187042			Srgap2			protein_coding
e11ve16_cond2_522	chr1	131764713	131765206	+	3.65069	NA	TTS (ENSMUST00000186122.6)	protein_coding-TTS (ENSMUST00000186122.6)	14468	ENSMUST00000147800.1	ENSMUSG00000042268	ENSMUST00000130544			Slc26a9			protein_coding
e11ve16_cond2_523	chr1	131938594	131939214	+	9.77143	NA	Intergenic	Intergenic	-5934	ENSMUST00000195496.1	ENSMUSG00000103975	ENSMUST00000195496			Gm37676			TEC
e11ve16_cond2_524	chr1	132161276	132161635	+	6.632	NA	Intergenic	Intergenic	-21771	ENSMUST00000027697.11	ENSMUSG00000026437	ENSMUST00000027697			Cdk18			protein_coding
e11ve16_cond2_525	chr1	132317459	132317992	+	6.69111	NA	TTS (ENSMUST00000128661.1)	protein_coding-TTS (ENSMUST00000128661.1)	1560	ENSMUST00000128661.1	ENSMUSG00000009772	ENSMUST00000128661			Nuak2			protein_coding
e11ve16_cond2_526	chr1	132319286	132319572	+	7.26506	NA	intron (ENSMUST00000082125.5, intron 1 of 6)	protein_coding-intron (ENSMUST00000072177.13, intron 1 of 7)	3264	ENSMUST00000128661.1	ENSMUSG00000009772	ENSMUST00000128661			Nuak2			protein_coding
e11ve16_cond2_527	chr1	132464925	132465302	+	3.61415	NA	exon (ENSMUST00000045110.13, exon 13 of 13)	protein_coding-exon (ENSMUST00000045110.13, exon 13 of 13)	2704	ENSMUST00000191494.1	ENSMUSG00000042046	ENSMUST00000191494			Dstyk			protein_coding
e11ve16_cond2_528	chr1	132483876	132484555	+	6.05766	NA	intron (ENSMUST00000187505.6, intron 2 of 13)	protein_coding-intron (ENSMUST00000027700.14, intron 2 of 14)	6573	ENSMUST00000189786.2	ENSMUSG00000026439	ENSMUST00000027700			Rbbp5			protein_coding
e11ve16_cond2_529	chr1	132560784	132561421	+	5.56652	NA	Intergenic	Intergenic	-17846	ENSMUST00000186530.2	ENSMUSG00000053024	ENSMUST00000188143			Cntn2			protein_coding
e11ve16_cond2_530	chr1	133226238	133227343	+	10.9775	NA	intron (ENSMUST00000187285.6, intron 1 of 22)	protein_coding-intron (ENSMUST00000187285.6, intron 1 of 22)	-19307	ENSMUST00000105082.8	ENSMUSG00000041757	ENSMUST00000212142			Plekha6			protein_coding
e11ve16_cond2_531	chr1	133321122	133321521	+	8.0142	NA	promoter-TSS (ENSMUST00000007433.4)	protein_coding-promoter-TSS (ENSMUST00000007433.4)	-554	ENSMUST00000007433.4	ENSMUSG00000116158	ENSMUST00000178033			Kiss1			protein_coding
e11ve16_cond2_532	chr1	133594708	133596001	+	32.117	NA	Intergenic	Intergenic	-5869	ENSMUST00000082880.1	ENSMUSG00000064814	ENSMUST00000082880			Gm23939			snoRNA
e11ve16_cond2_533	chr1	133637581	133638736	+	7.81281	NA	TTS (ENSMUST00000194668.5)	protein_coding-TTS (ENSMUST00000194668.5)	1012	ENSMUST00000195669.1	ENSMUSG00000102976	ENSMUST00000193504			Zc3h11a			protein_coding
e11ve16_cond2_534	chr1	133744468	133745304	+	6.1642	NA	intron (ENSMUST00000143567.7, intron 2 of 20)	protein_coding-intron (ENSMUST00000048953.13, intron 1 of 20)	8395	ENSMUST00000112264.1	ENSMUSG00000026463	ENSMUST00000048953			Atp2b4			protein_coding
e11ve16_cond2_535	chr1	133978604	133979166	+	6.33776	NA	Intergenic	Intergenic	16723	ENSMUST00000188504.1	ENSMUSG00000100987	ENSMUST00000188504			Gm1627			lncRNA
e11ve16_cond2_536	chr1	134007025	134007244	+	3.44966	NA	Intergenic	Intergenic	26244	ENSMUST00000186040.1	ENSMUSG00000099507	ENSMUST00000186040			Gm18970			processed_pseudogene
e11ve16_cond2_537	chr1	134096197	134096883	+	43.0094	NA	exon (ENSMUST00000193617.1, exon 1 of 1)	TEC-exon (ENSMUST00000193617.1, exon 1 of 1)	2619	ENSMUST00000193617.1	ENSMUSG00000102380	ENSMUST00000193617			Gm38140			TEC
e11ve16_cond2_538	chr1	134216970	134217400	+	6.60017	NA	intron (ENSMUST00000187631.1, intron 2 of 2)	protein_coding-intron (ENSMUST00000038191.7, intron 1 of 1)	17393	ENSMUST00000169927.1	ENSMUSG00000042429	ENSMUST00000038191			Adora1			protein_coding
e11ve16_cond2_539	chr1	134232687	134233565	+	29.0923	NA	intron (ENSMUST00000187631.1, intron 2 of 2)	protein_coding-intron (ENSMUST00000038191.7, intron 1 of 1)	1452	ENSMUST00000169927.1	ENSMUSG00000042429	ENSMUST00000038191			Adora1			protein_coding
e11ve16_cond2_540	chr1	134243683	134244134	+	4.37285	NA	Intergenic	Intergenic	-8477	ENSMUST00000086465.5	ENSMUSG00000042429	ENSMUST00000038191			Adora1			protein_coding
e11ve16_cond2_541	chr1	134651805	134652127	+	5.95493	NA	intron (ENSMUST00000187725.6, intron 1 of 2)	protein_coding-intron (ENSMUST00000187725.6, intron 1 of 2)	5285	ENSMUST00000188842.6	ENSMUSG00000026452	ENSMUST00000121990			Syt2			protein_coding
e11ve16_cond2_542	chr1	134784198	134784754	+	8.14591	NA	intron (ENSMUST00000156348.7, intron 6 of 12)	protein_coding-intron (ENSMUST00000045665.12, intron 18 of 23)	-1179	ENSMUST00000191540.1	ENSMUSG00000073557	ENSMUST00000045665			Ppp1r12b			protein_coding
e11ve16_cond2_543	chr1	134803925	134804178	+	3.64876	NA	promoter-TSS (ENSMUST00000141419.1)	protein_coding-promoter-TSS (ENSMUST00000141419.1)	-200	ENSMUST00000238280.1	ENSMUSG00000073557	ENSMUST00000045665			Ppp1r12b			protein_coding
e11ve16_cond2_544	chr1	135018935	135019441	+	9.22923	NA	intron (ENSMUST00000044828.13, intron 6 of 17)	protein_coding-intron (ENSMUST00000044828.13, intron 6 of 17)	-1409	ENSMUST00000137968.7	ENSMUSG00000042793	ENSMUST00000139369			Lgr6			protein_coding
e11ve16_cond2_545	chr1	135227310	135228284	+	19.3084	NA	Intergenic	Intergenic	-4198	ENSMUST00000110798.4	ENSMUSG00000079139	ENSMUST00000110798			Gm4204			processed_pseudogene
e11ve16_cond2_546	chr1	135856937	135857534	+	5.88261	NA	Intergenic	Intergenic	7785	ENSMUST00000188098.1	ENSMUSG00000026414	ENSMUST00000112086			Tnnt2			protein_coding
e11ve16_cond2_547	chr1	136365924	136366304	+	10.6687	NA	Intergenic	Intergenic	-20010	ENSMUST00000048309.11	ENSMUSG00000041570	ENSMUST00000194808			Camsap2			protein_coding
e11ve16_cond2_548	chr1	136525176	136525585	+	4.02035	NA	intron (ENSMUST00000189413.6, intron 26 of 28)	protein_coding-intron (ENSMUST00000047817.11, intron 27 of 29)	1496	ENSMUST00000190220.1	ENSMUSG00000101413	ENSMUST00000190220			Gm29485			processed_pseudogene
e11ve16_cond2_549	chr1	136527383	136527586	+	7.1751	NA	exon (ENSMUST00000047817.11, exon 30 of 30)	protein_coding-exon (ENSMUST00000047817.11, exon 30 of 30)	3600	ENSMUST00000190220.1	ENSMUSG00000101413	ENSMUST00000190220			Gm29485			processed_pseudogene
e11ve16_cond2_550	chr1	137079468	137079880	+	10.142	NA	Intergenic	Intergenic	-89404	ENSMUST00000158345.1	ENSMUSG00000088970	ENSMUST00000158345			Gm23763			snRNA
e11ve16_cond2_551	chr1	137565169	137566102	+	22.4756	NA	Intergenic	Intergenic	-34405	ENSMUST00000192122.1	ENSMUSG00000103070	ENSMUST00000192122			Gm37903			TEC
e11ve16_cond2_552	chr1	137706030	137707325	+	11.2065	NA	Intergenic	Intergenic	-27641	ENSMUST00000158090.1	ENSMUSG00000088715	ENSMUST00000158090			Gm22727			snoRNA
e11ve16_cond2_553	chr1	138283379	138284029	+	7.33385	NA	exon (ENSMUST00000027643.5, exon 2 of 3)	protein_coding-exon (ENSMUST00000027643.5, exon 2 of 3)	9966	ENSMUST00000027643.5	ENSMUSG00000026394	ENSMUST00000027643			Atp6v1g3			protein_coding
e11ve16_cond2_554	chr1	138289649	138290586	+	13.7715	NA	TTS (ENSMUST00000027643.5)	protein_coding-TTS (ENSMUST00000027643.5)	16379	ENSMUST00000027643.5	ENSMUSG00000026394	ENSMUST00000027643			Atp6v1g3			protein_coding
e11ve16_cond2_555	chr1	138506992	138507647	+	3.82506	NA	intron (ENSMUST00000186017.6, intron 7 of 9)	protein_coding-intron (ENSMUST00000027642.4, intron 7 of 7)	-8296	ENSMUST00000188729.2	ENSMUSG00000099510	ENSMUST00000188729			Gm28501			lncRNA
e11ve16_cond2_556	chr1	138619327	138619760	+	3.97503	NA	intron (ENSMUST00000187407.6, intron 1 of 9)	protein_coding-intron (ENSMUST00000027642.4, intron 1 of 7)	131	ENSMUST00000027642.4	ENSMUSG00000026393	ENSMUST00000187407			Nek7			protein_coding
e11ve16_cond2_557	chr1	138641327	138641748	+	4.16014	NA	intron (ENSMUST00000190707.6, intron 4 of 4)	lncRNA-intron (ENSMUST00000190707.6, intron 4 of 4)	-21396	ENSMUST00000187407.6	ENSMUSG00000026393	ENSMUST00000187407			Nek7			protein_coding
e11ve16_cond2_558	chr1	138856510	138856855	+	7.17329	NA	exon (ENSMUST00000112025.2, exon 1 of 3)	protein_coding-exon (ENSMUST00000112025.2, exon 1 of 3)	165	ENSMUST00000193374.1	ENSMUSG00000079283	ENSMUST00000112025			2310009B15Rik			protein_coding
e11ve16_cond2_559	chr1	138928497	138930534	+	18.3008	NA	Intergenic	Intergenic	-13472	ENSMUST00000195391.1	ENSMUSG00000103850	ENSMUST00000195391			Gm3933			processed_pseudogene
e11ve16_cond2_560	chr1	138992546	138992844	+	3.3545	NA	promoter-TSS (ENSMUST00000140747.2)	processed_pseudogene-promoter-TSS (ENSMUST00000140747.2)	-626	ENSMUST00000140747.2	ENSMUSG00000085361	ENSMUST00000140747			Gm16305			processed_pseudogene
e11ve16_cond2_561	chr1	139064608	139064951	+	7.5071	NA	intron (ENSMUST00000198759.4, intron 7 of 8)	protein_coding-intron (ENSMUST00000094505.5, intron 8 of 20)	-5434	ENSMUST00000196474.1	ENSMUSG00000105936	ENSMUST00000196474			Gm43544			TEC
e11ve16_cond2_562	chr1	139171468	139172535	+	14.9883	NA	exon (ENSMUST00000094505.5, exon 21 of 21)	protein_coding-exon (ENSMUST00000094505.5, exon 21 of 21)	16849	ENSMUST00000191655.1	ENSMUSG00000102243	ENSMUST00000191655			Gm37718			TEC
e11ve16_cond2_563	chr1	139422118	139422498	+	4.28761	NA	promoter-TSS (ENSMUST00000039867.9)	protein_coding-promoter-TSS (ENSMUST00000039867.9)	20	ENSMUST00000200243.4	ENSMUSG00000033964	ENSMUST00000199011			Zbtb41			protein_coding
e11ve16_cond2_564	chr1	142071293	142071515	+	6.69252	NA	Intergenic	Intergenic	384410	ENSMUST00000191024.2	ENSMUSG00000099671	ENSMUST00000191024			Gm18183			processed_pseudogene
e11ve16_cond2_565	chr1	142096808	142097167	+	5.48858	NA	Intergenic	Intergenic	358827	ENSMUST00000191024.2	ENSMUSG00000099671	ENSMUST00000191024			Gm18183			processed_pseudogene
e11ve16_cond2_566	chr1	142382068	142382971	+	6.27163	NA	Intergenic	Intergenic	73295	ENSMUST00000191024.2	ENSMUSG00000099671	ENSMUST00000191024			Gm18183			processed_pseudogene
e11ve16_cond2_567	chr1	143738935	143739616	+	7.14945	NA	promoter-TSS (ENSMUST00000050491.10)	protein_coding-promoter-TSS (ENSMUST00000050491.10)	246	ENSMUST00000145969.7	ENSMUSG00000018196	ENSMUST00000149103			Glrx2			protein_coding
e11ve16_cond2_568	chr1	143776793	143777548	+	7.80544	NA	promoter-TSS (ENSMUST00000018333.12)	protein_coding-promoter-TSS (ENSMUST00000018333.12)	-102	ENSMUST00000159879.1	ENSMUSG00000018199	ENSMUST00000159879			Ro60			protein_coding
e11ve16_cond2_569	chr1	143878261	143878749	+	5.29397	NA	Intergenic	Intergenic	83788	ENSMUST00000185539.1	ENSMUSG00000018189	ENSMUST00000191512			Uchl5			protein_coding
e11ve16_cond2_570	chr1	144003998	144004664	+	5.20677	NA	promoter-TSS (ENSMUST00000027606.3)	protein_coding-promoter-TSS (ENSMUST00000027606.3)	-170	ENSMUST00000127206.7	ENSMUSG00000026360	ENSMUST00000134817			Rgs2			protein_coding
e11ve16_cond2_571	chr1	144018513	144018817	+	3.54126	NA	Intergenic	Intergenic	-14504	ENSMUST00000127206.7	ENSMUSG00000026360	ENSMUST00000134817			Rgs2			protein_coding
e11ve16_cond2_572	chr1	144019014	144019338	+	4.1326	NA	Intergenic	Intergenic	-15015	ENSMUST00000127206.7	ENSMUSG00000026360	ENSMUST00000134817			Rgs2			protein_coding
e11ve16_cond2_573	chr1	144330440	144330846	+	7.374	NA	Intergenic	Intergenic	-18207	ENSMUST00000187999.1	ENSMUSG00000100441	ENSMUST00000187999			Gm7266			processed_pseudogene
e11ve16_cond2_574	chr1	149862845	149863125	+	8.19435	NA	intron (ENSMUST00000111926.8, intron 11 of 16)	protein_coding-intron (ENSMUST00000070200.14, intron 12 of 17)	21455	ENSMUST00000104328.1	ENSMUSG00000077516	ENSMUST00000104328			n-R5s219			rRNA
e11ve16_cond2_575	chr1	149961016	149961250	+	4.44605	NA	intron (ENSMUST00000070200.14, intron 1 of 17)	protein_coding-intron (ENSMUST00000070200.14, intron 1 of 17)	122	ENSMUST00000134676.1	ENSMUSG00000056220	ENSMUST00000142040			Pla2g4a			protein_coding
e11ve16_cond2_576	chr1	149983093	149983326	+	11.4083	NA	Intergenic	Intergenic	-21919	ENSMUST00000070200.14	ENSMUSG00000056220	ENSMUST00000142040			Pla2g4a			protein_coding
e11ve16_cond2_577	chr1	150115442	150115652	+	4.80965	NA	Intergenic	Intergenic	15215	ENSMUST00000190784.1	ENSMUSG00000032487	ENSMUST00000035065			Ptgs2			protein_coding
e11ve16_cond2_578	chr1	150139814	150140315	+	7.5698	NA	Intergenic	Intergenic	-5904	ENSMUST00000189312.1	ENSMUSG00000101199	ENSMUST00000189312			Gm9687			processed_pseudogene
e11ve16_cond2_579	chr1	150392696	150393457	+	10.4522	NA	promoter-TSS (ENSMUST00000006167.12)	protein_coding-promoter-TSS (ENSMUST00000006167.12)	4	ENSMUST00000111913.8	ENSMUSG00000006010	ENSMUST00000140112			Odr4			protein_coding
e11ve16_cond2_580	chr1	150534629	150535186	+	8.95056	NA	Intergenic	Intergenic	-14410	ENSMUST00000186208.1	ENSMUSG00000101519	ENSMUST00000186208			Ska2l-ps			processed_pseudogene
e11ve16_cond2_581	chr1	150763693	150764305	+	4.79641	NA	intron (ENSMUST00000137197.8, intron 15 of 105)	protein_coding-intron (ENSMUST00000074783.11, intron 15 of 106)	138700	ENSMUST00000177268.1	ENSMUSG00000093650	ENSMUST00000177239			Gm20631			lncRNA
e11ve16_cond2_582	chr1	150836302	150836577	+	3.5702	NA	intron (ENSMUST00000137197.8, intron 4 of 105)	protein_coding-intron (ENSMUST00000074783.11, intron 4 of 106)	156612	ENSMUST00000074783.11	ENSMUSG00000066842	ENSMUST00000137909			Hmcn1			protein_coding
e11ve16_cond2_583	chr1	150897950	150898204	+	3.33777	NA	intron (ENSMUST00000074783.11, intron 1 of 106)	protein_coding-intron (ENSMUST00000074783.11, intron 1 of 106)	94974	ENSMUST00000074783.11	ENSMUSG00000066842	ENSMUST00000137909			Hmcn1			protein_coding
e11ve16_cond2_584	chr1	151059477	151059808	+	7.6965	NA	Intergenic	Intergenic	2468	ENSMUST00000180118.1	ENSMUSG00000096851	ENSMUST00000180118			Gm22756			snRNA
e11ve16_cond2_585	chr1	151624648	151625040	+	9.28531	NA	intron (ENSMUST00000134499.7, intron 2 of 4)	protein_coding-intron (ENSMUST00000097541.9, intron 1 of 14)	-52323	ENSMUST00000086267.5	ENSMUSG00000026483	ENSMUST00000134499			Fam129a			protein_coding
e11ve16_cond2_586	chr1	151665082	151665534	+	4.75773	NA	intron (ENSMUST00000148810.7, intron 5 of 13)	protein_coding-intron (ENSMUST00000097541.9, intron 5 of 14)	-11859	ENSMUST00000086267.5	ENSMUSG00000026483	ENSMUST00000134499			Fam129a			protein_coding
e11ve16_cond2_587	chr1	151890072	151891313	+	11.0363	NA	exon (ENSMUST00000044581.13, exon 6 of 6)	protein_coding-exon (ENSMUST00000044581.13, exon 6 of 6)	15273	ENSMUST00000187716.1	ENSMUSG00000100685	ENSMUST00000187716			Gm28610			lncRNA
e11ve16_cond2_588	chr1	152076147	152076736	+	7.38316	NA	intron (ENSMUST00000187603.6, intron 1 of 6)	protein_coding-intron (ENSMUST00000044581.13, intron 1 of 5)	13529	ENSMUST00000187603.6	ENSMUSG00000032666	ENSMUST00000121533			1700025G04Rik			protein_coding
e11ve16_cond2_589	chr1	152640558	152640852	+	4.43545	NA	intron (ENSMUST00000111859.7, intron 2 of 18)	protein_coding-intron (ENSMUST00000111857.2, intron 2 of 17)	-15488	ENSMUST00000027760.13	ENSMUSG00000026482	ENSMUST00000111857			Rgl1			protein_coding
e11ve16_cond2_590	chr1	153004465	153005011	+	12.3364	NA	intron (ENSMUST00000185241.1, intron 2 of 4)	protein_coding-intron (ENSMUST00000043313.14, intron 1 of 10)	-28636	ENSMUST00000187569.1	ENSMUSG00000042751	ENSMUST00000185241			Nmnat2			protein_coding
e11ve16_cond2_591	chr1	153175024	153175253	+	7.54302	NA	intron (ENSMUST00000027753.12, intron 2 of 23)	protein_coding-intron (ENSMUST00000027753.12, intron 2 of 23)	10909	ENSMUST00000185356.6	ENSMUSG00000026479	ENSMUST00000185356			Lamc2			protein_coding
e11ve16_cond2_592	chr1	153191632	153192398	+	7.48227	NA	Intergenic	Intergenic	-5568	ENSMUST00000027753.12	ENSMUSG00000026479	ENSMUST00000185356			Lamc2			protein_coding
e11ve16_cond2_593	chr1	153278108	153278398	+	4.25494	NA	intron (ENSMUST00000027752.14, intron 1 of 27)	protein_coding-intron (ENSMUST00000027752.14, intron 1 of 27)	8937	ENSMUST00000194884.1	ENSMUSG00000103818	ENSMUST00000194884			Gm38009			TEC
e11ve16_cond2_594	chr1	153367108	153367535	+	20.3499	NA	Intergenic	Intergenic	-34535	ENSMUST00000027752.14	ENSMUSG00000026478	ENSMUST00000160515			Lamc1			protein_coding
e11ve16_cond2_595	chr1	153590251	153590722	+	11.0873	NA	Intergenic	Intergenic	30187	ENSMUST00000186414.1	ENSMUSG00000099858	ENSMUST00000186414			Gm6652			processed_pseudogene
e11ve16_cond2_596	chr1	153703990	153704495	+	3.97647	NA	Intergenic	Intergenic	-10412	ENSMUST00000193511.1	ENSMUSG00000102404	ENSMUST00000193511			5530400K19Rik			TEC
e11ve16_cond2_597	chr1	153899696	153900014	+	4.07291	NA	promoter-TSS (ENSMUST00000086199.11)	protein_coding-promoter-TSS (ENSMUST00000086199.11)	-71	ENSMUST00000183582.1	ENSMUSG00000099227	ENSMUST00000183582			Mir8114			miRNA
e11ve16_cond2_598	chr1	153924586	153924953	+	3.61371	NA	Intergenic	Intergenic	-14457	ENSMUST00000185385.1	ENSMUSG00000100014	ENSMUST00000185385			Gm29290			lncRNA
e11ve16_cond2_599	chr1	155051856	155052311	+	3.48619	NA	intron (ENSMUST00000190720.1, intron 1 of 3)	lncRNA-intron (ENSMUST00000190720.1, intron 1 of 3)	5096	ENSMUST00000190720.1	ENSMUSG00000101880	ENSMUST00000190720			Gm29282			lncRNA
e11ve16_cond2_600	chr1	155092535	155094081	+	18.197	NA	Intergenic	Intergenic	6328	ENSMUST00000055322.5	ENSMUSG00000056708	ENSMUST00000055322			Ier5			protein_coding
e11ve16_cond2_601	chr1	155169746	155170204	+	9.70344	NA	intron (ENSMUST00000192519.5, intron 1 of 5)	protein_coding-intron (ENSMUST00000027743.12, intron 1 of 7)	-9826	ENSMUST00000195316.1	ENSMUSG00000104181	ENSMUST00000195316			Gm8850			processed_pseudogene
e11ve16_cond2_602	chr1	155196486	155197023	+	22.6841	NA	intron (ENSMUST00000194158.1, intron 1 of 2)	protein_coding-intron (ENSMUST00000194158.1, intron 1 of 2)	1733	ENSMUST00000194158.1	ENSMUSG00000026470	ENSMUST00000192519			Stx6			protein_coding
e11ve16_cond2_603	chr1	155199613	155200024	+	3.40968	NA	intron (ENSMUST00000192690.1, intron 3 of 3)	protein_coding-intron (ENSMUST00000027743.12, intron 7 of 7)	4797	ENSMUST00000194158.1	ENSMUSG00000026470	ENSMUST00000192519			Stx6			protein_coding
e11ve16_cond2_604	chr1	155201651	155202341	+	12.7534	NA	TTS (ENSMUST00000193059.5)	protein_coding-TTS (ENSMUST00000193059.5)	6975	ENSMUST00000194158.1	ENSMUSG00000026470	ENSMUST00000192519			Stx6			protein_coding
e11ve16_cond2_605	chr1	155439760	155440159	+	4.00099	NA	Intergenic	Intergenic	-22544	ENSMUST00000111774.1	ENSMUSG00000026469	ENSMUST00000129271			Xpr1			protein_coding
e11ve16_cond2_606	chr1	155505157	155505696	+	6.26745	NA	Intergenic	Intergenic	21685	ENSMUST00000097531.2	ENSMUSG00000073535	ENSMUST00000194133			Gm5532			lncRNA
e11ve16_cond2_607	chr1	155973367	155973721	+	3.47665	NA	promoter-TSS (ENSMUST00000124495.2)	protein_coding-promoter-TSS (ENSMUST00000124495.2)	226	ENSMUST00000193347.1	ENSMUSG00000102833	ENSMUST00000193347			Gm9694			TEC
e11ve16_cond2_608	chr1	156377512	156378157	+	5.99472	NA	intron (ENSMUST00000213088.1, intron 14 of 24)	protein_coding-intron (ENSMUST00000027895.7, intron 9 of 10)	-1342	ENSMUST00000179572.1	ENSMUSG00000026601	ENSMUST00000213088			Axdnd1			protein_coding
e11ve16_cond2_609	chr1	156458368	156458899	+	4.74975	NA	TTS (ENSMUST00000192072.1)	TEC-TTS (ENSMUST00000192072.1)	3343	ENSMUST00000192072.1	ENSMUSG00000103199	ENSMUST00000192072			Gm37648			TEC
e11ve16_cond2_610	chr1	156467821	156468244	+	5.48081	NA	intron (ENSMUST00000191379.6, intron 1 of 6)	protein_coding-intron (ENSMUST00000187073.1, intron 1 of 3)	-1228	ENSMUST00000051396.12	ENSMUSG00000026600	ENSMUST00000191379			Soat1			protein_coding
e11ve16_cond2_611	chr1	156620315	156620684	+	4.14946	NA	intron (ENSMUST00000190749.1, intron 1 of 4)	protein_coding-intron (ENSMUST00000027888.12, intron 1 of 11)	4576	ENSMUST00000190749.1	ENSMUSG00000026596	ENSMUST00000166172			Abl2			protein_coding
e11ve16_cond2_612	chr1	156660562	156661310	+	15.4183	NA	TTS (ENSMUST00000152604.1)	protein_coding-TTS (ENSMUST00000152604.1)	-2478	ENSMUST00000154353.1	ENSMUSG00000060519	ENSMUST00000079625			Tor3a			protein_coding
e11ve16_cond2_613	chr1	156666936	156667920	+	15.7598	NA	promoter-TSS (ENSMUST00000152604.1)	protein_coding-promoter-TSS (ENSMUST00000152604.1)	-698	ENSMUST00000152604.1	ENSMUSG00000060519	ENSMUST00000079625			Tor3a			protein_coding
e11ve16_cond2_614	chr1	156741746	156741979	+	3.3805	NA	Intergenic	Intergenic	-22776	ENSMUST00000086153.7	ENSMUSG00000033557	ENSMUST00000086153			Fam20b			protein_coding
e11ve16_cond2_615	chr1	156761318	156761934	+	6.56973	NA	Intergenic	Intergenic	-31886	ENSMUST00000121352.1	ENSMUSG00000046057	ENSMUST00000121352			Gm15428			processed_pseudogene
e11ve16_cond2_616	chr1	157001050	157001309	+	4.47504	NA	intron (ENSMUST00000190681.1, intron 2 of 2)	lncRNA-intron (ENSMUST00000190681.1, intron 2 of 2)	-42368	ENSMUST00000193527.1	ENSMUSG00000103325	ENSMUST00000193527			Gm10531			TEC
e11ve16_cond2_617	chr1	157117372	157117970	+	7.10793	NA	Intergenic	Intergenic	-1277	ENSMUST00000209278.1	ENSMUSG00000109913	ENSMUST00000209278			Gm30694			unitary_pseudogene
e11ve16_cond2_618	chr1	157137024	157137867	+	13.9459	NA	exon (ENSMUST00000078308.12, exon 18 of 18)	protein_coding-exon (ENSMUST00000078308.12, exon 18 of 18)	18497	ENSMUST00000209278.1	ENSMUSG00000109913	ENSMUST00000209278			Gm30694			unitary_pseudogene
e11ve16_cond2_619	chr1	157412282	157412587	+	4.297	NA	promoter-TSS (ENSMUST00000061537.11)	transcribed_processed_pseudogene-promoter-TSS (ENSMUST00000061537.11)	82	ENSMUST00000061537.11	ENSMUSG00000049881	ENSMUST00000194868			2810025M15Rik			transcribed_processed_pseudogene
e11ve16_cond2_620	chr1	157516789	157518539	+	34.1662	NA	intron (ENSMUST00000086130.8, intron 2 of 27)	protein_coding-intron (ENSMUST00000027881.14, intron 1 of 26)	-5943	ENSMUST00000135147.2	ENSMUSG00000087093	ENSMUST00000135147			Gm15486			lncRNA
e11ve16_cond2_621	chr1	157525980	157526931	+	4.61374	NA	intron (ENSMUST00000111700.7, intron 1 of 25)	protein_coding-intron (ENSMUST00000027881.14, intron 2 of 26)	308	ENSMUST00000111700.7	ENSMUSG00000026589	ENSMUST00000086130			Sec16b			protein_coding
e11ve16_cond2_622	chr1	157732371	157732614	+	4.25596	NA	Intergenic	Intergenic	-110356	ENSMUST00000193203.1	ENSMUSG00000103962	ENSMUST00000193203			Gm38213			processed_pseudogene
e11ve16_cond2_623	chr1	158126019	158126646	+	7.87131	NA	intron (ENSMUST00000192097.1, intron 3 of 3)	TEC-intron (ENSMUST00000192097.1, intron 3 of 3)	170132	ENSMUST00000194578.1	ENSMUSG00000004031	ENSMUST00000192709			Brinp2			protein_coding
e11ve16_cond2_624	chr1	158129294	158129891	+	6.44059	NA	intron (ENSMUST00000192097.1, intron 3 of 3)	TEC-intron (ENSMUST00000192097.1, intron 3 of 3)	166872	ENSMUST00000194578.1	ENSMUSG00000004031	ENSMUST00000192709			Brinp2			protein_coding
e11ve16_cond2_625	chr1	158163246	158163564	+	4.9772	NA	Intergenic	Intergenic	133059	ENSMUST00000194578.1	ENSMUSG00000004031	ENSMUST00000192709			Brinp2			protein_coding
e11ve16_cond2_626	chr1	158187281	158187959	+	4.55724	NA	Intergenic	Intergenic	108844	ENSMUST00000194578.1	ENSMUSG00000004031	ENSMUST00000192709			Brinp2			protein_coding
e11ve16_cond2_627	chr1	158252842	158253143	+	19.1199	NA	intron (ENSMUST00000195271.4, intron 5 of 7)	protein_coding-intron (ENSMUST00000004133.10, intron 5 of 7)	43472	ENSMUST00000194578.1	ENSMUSG00000004031	ENSMUST00000192709			Brinp2			protein_coding
e11ve16_cond2_628	chr1	158579580	158580171	+	16.2022	NA	intron (ENSMUST00000046110.15, intron 10 of 22)	protein_coding-intron (ENSMUST00000046110.15, intron 10 of 22)	-17103	ENSMUST00000194041.1	ENSMUSG00000026587	ENSMUST00000193042			Astn1			protein_coding
e11ve16_cond2_629	chr1	159231351	159231916	+	7.27955	NA	promoter-TSS (ENSMUST00000076894.10)	protein_coding-promoter-TSS (ENSMUST00000076894.10)	-687	ENSMUST00000195800.5	ENSMUSG00000040782	ENSMUST00000192215			Cop1			protein_coding
e11ve16_cond2_630	chr1	159232222	159232683	+	7.54414	NA	promoter-TSS (ENSMUST00000192215.5)	protein_coding-promoter-TSS (ENSMUST00000192215.5)	126	ENSMUST00000076894.10	ENSMUSG00000040782	ENSMUST00000192215			Cop1			protein_coding
e11ve16_cond2_631	chr1	159686266	159686963	+	9.27903	NA	intron (ENSMUST00000195199.1, intron 1 of 1)	protein_coding-intron (ENSMUST00000192069.5, intron 1 of 22)	4952	ENSMUST00000194909.1	ENSMUSG00000073528	ENSMUST00000097514			Gm10530			lncRNA
e11ve16_cond2_632	chr1	159852009	159852346	+	8.06413	NA	exon (ENSMUST00000111669.8, exon 3 of 22)	protein_coding-exon (ENSMUST00000111669.8, exon 3 of 22)	1780	ENSMUST00000192457.1	ENSMUSG00000015829	ENSMUST00000192457			Tnr			protein_coding
e11ve16_cond2_633	chr1	159854394	159854698	+	5.13011	NA	intron (ENSMUST00000192069.5, intron 4 of 22)	protein_coding-intron (ENSMUST00000111669.8, intron 3 of 21)	4149	ENSMUST00000192457.1	ENSMUSG00000015829	ENSMUST00000192457			Tnr			protein_coding
e11ve16_cond2_634	chr1	159869861	159870345	+	4.93897	NA	intron (ENSMUST00000192069.5, intron 8 of 22)	protein_coding-intron (ENSMUST00000111669.8, intron 7 of 21)	19706	ENSMUST00000192457.1	ENSMUSG00000015829	ENSMUST00000192457			Tnr			protein_coding
e11ve16_cond2_635	chr1	159950991	159951926	+	6.80253	NA	Intergenic	Intergenic	-19732	ENSMUST00000195328.1	ENSMUSG00000103719	ENSMUST00000195328			Gm38039			lncRNA
e11ve16_cond2_636	chr1	160044120	160045446	+	12.9952	NA	promoter-TSS (ENSMUST00000193461.1)	lncRNA-promoter-TSS (ENSMUST00000193461.1)	336	ENSMUST00000165923.1	ENSMUSG00000090394	ENSMUST00000165923			4930523C07Rik			protein_coding
e11ve16_cond2_637	chr1	160057712	160057980	+	4.59659	NA	intron (ENSMUST00000165923.1, intron 2 of 3)	protein_coding-intron (ENSMUST00000060298.14, intron 1 of 2)	13399	ENSMUST00000165923.1	ENSMUSG00000090394	ENSMUST00000165923			4930523C07Rik			protein_coding
e11ve16_cond2_638	chr1	160060221	160060951	+	12.1036	NA	intron (ENSMUST00000165923.1, intron 2 of 3)	protein_coding-intron (ENSMUST00000060298.14, intron 1 of 2)	-14576	ENSMUST00000097513.3	ENSMUSG00000090394	ENSMUST00000165923			4930523C07Rik			protein_coding
e11ve16_cond2_639	chr1	160079184	160079889	+	11.5981	NA	exon (ENSMUST00000163892.7, exon 3 of 3)	protein_coding-exon (ENSMUST00000163892.7, exon 3 of 3)	-1551	ENSMUST00000164249.2	ENSMUSG00000026729	ENSMUST00000164249			4930562F07Rik			lncRNA
e11ve16_cond2_640	chr1	160195228	160195618	+	3.43933	NA	exon (ENSMUST00000097193.2, exon 1 of 3)	protein_coding-exon (ENSMUST00000097193.2, exon 1 of 3)	120	ENSMUST00000097193.2	ENSMUSG00000058267	ENSMUST00000078878			Mrps14			protein_coding
e11ve16_cond2_641	chr1	160212528	160213351	+	5.35677	NA	promoter-TSS (ENSMUST00000014370.10)	protein_coding-promoter-TSS (ENSMUST00000014370.10)	-4	ENSMUST00000193962.1	ENSMUSG00000103006	ENSMUST00000193962			4933417C20Rik			TEC
e11ve16_cond2_642	chr1	160263226	160264409	+	54.7304	NA	promoter-TSS (ENSMUST00000194105.1)	lncRNA-promoter-TSS (ENSMUST00000194105.1)	-507	ENSMUST00000194105.1	ENSMUSG00000104302	ENSMUST00000194105			Gm36975			lncRNA
e11ve16_cond2_643	chr1	160306768	160307111	+	5.64732	NA	intron (ENSMUST00000194105.1, intron 4 of 4)	protein_coding-intron (ENSMUST00000028049.12, intron 19 of 20)	400	ENSMUST00000193185.5	ENSMUSG00000026721	ENSMUST00000193810			Rabgap1l			protein_coding
e11ve16_cond2_644	chr1	160308663	160309191	+	6.28209	NA	intron (ENSMUST00000191941.1, intron 1 of 3)	protein_coding-intron (ENSMUST00000028049.12, intron 19 of 20)	244	ENSMUST00000191941.1	ENSMUSG00000026721	ENSMUST00000193810			Rabgap1l			protein_coding
e11ve16_cond2_645	chr1	160370234	160371118	+	15.1807	NA	intron (ENSMUST00000191651.5, intron 2 of 4)	protein_coding-intron (ENSMUST00000028049.12, intron 18 of 20)	-19105	ENSMUST00000028052.11	ENSMUSG00000026721	ENSMUST00000193810			Rabgap1l			protein_coding
e11ve16_cond2_646	chr1	160377386	160377833	+	4.40375	NA	intron (ENSMUST00000191651.5, intron 2 of 4)	protein_coding-intron (ENSMUST00000028049.12, intron 18 of 20)	-26038	ENSMUST00000028052.11	ENSMUSG00000026721	ENSMUST00000193810			Rabgap1l			protein_coding
e11ve16_cond2_647	chr1	160378071	160378530	+	4.51573	NA	intron (ENSMUST00000191651.5, intron 2 of 4)	protein_coding-intron (ENSMUST00000028049.12, intron 18 of 20)	-26729	ENSMUST00000028052.11	ENSMUSG00000026721	ENSMUST00000193810			Rabgap1l			protein_coding
e11ve16_cond2_648	chr1	160399698	160400060	+	4.19029	NA	intron (ENSMUST00000028049.12, intron 17 of 20)	protein_coding-intron (ENSMUST00000028049.12, intron 17 of 20)	41988	ENSMUST00000191651.5	ENSMUSG00000026721	ENSMUST00000193810			Rabgap1l			protein_coding
e11ve16_cond2_649	chr1	160693119	160693341	+	8.67319	NA	intron (ENSMUST00000195442.5, intron 11 of 12)	protein_coding-intron (ENSMUST00000028049.12, intron 10 of 20)	33451	ENSMUST00000193191.1	ENSMUSG00000103200	ENSMUST00000193191			Gm37328			lncRNA
e11ve16_cond2_650	chr1	160906097	160906403	+	4.46098	NA	promoter-TSS (ENSMUST00000161609.7)	protein_coding-promoter-TSS (ENSMUST00000161609.7)	-168	ENSMUST00000161609.7	ENSMUSG00000040423	ENSMUST00000161708			Rc3h1			protein_coding
e11ve16_cond2_651	chr1	161034580	161034937	+	4.9904	NA	promoter-TSS (ENSMUST00000065709.11)	lncRNA-promoter-TSS (ENSMUST00000065709.11)	58	ENSMUST00000177003.1	ENSMUSG00000043467	ENSMUST00000163079			Zbtb37			protein_coding
e11ve16_cond2_652	chr1	161070615	161070832	+	4.42955	NA	promoter-TSS (ENSMUST00000028035.13)	protein_coding-promoter-TSS (ENSMUST00000028035.13)	10	ENSMUST00000028035.13	ENSMUSG00000026708	ENSMUST00000192850			Cenpl			protein_coding
e11ve16_cond2_653	chr1	161195392	161195643	+	7.47557	NA	intron (ENSMUST00000193379.1, intron 6 of 25)	transcribed_unprocessed_pseudogene-intron (ENSMUST00000193379.1, intron 6 of 25)	-5292	ENSMUST00000212885.1	ENSMUSG00000102817	ENSMUST00000212885			Gm6185			transcribed_unprocessed_pseudogene
e11ve16_cond2_654	chr1	161269402	161269784	+	4.31829	NA	Intergenic	Intergenic	-18374	ENSMUST00000071718.11	ENSMUSG00000026701	ENSMUST00000156678			Prdx6			protein_coding
e11ve16_cond2_655	chr1	161413228	161413433	+	4.65611	NA	intron (ENSMUST00000028024.4, intron 1 of 2)	protein_coding-intron (ENSMUST00000028024.4, intron 1 of 2)	17921	ENSMUST00000028024.4	ENSMUSG00000026700	ENSMUST00000028024			Tnfsf4			protein_coding
e11ve16_cond2_656	chr1	161494468	161494794	+	15.431	NA	promoter-TSS (ENSMUST00000086084.1)	protein_coding-promoter-TSS (ENSMUST00000086084.1)	-24	ENSMUST00000086084.1	ENSMUSG00000066755	ENSMUST00000086084			Tnfsf18			protein_coding
e11ve16_cond2_657	chr1	161496123	161496565	+	7.80535	NA	intron (ENSMUST00000086084.1, intron 1 of 2)	protein_coding-intron (ENSMUST00000086084.1, intron 1 of 2)	1689	ENSMUST00000086084.1	ENSMUSG00000066755	ENSMUST00000086084			Tnfsf18			protein_coding
e11ve16_cond2_658	chr1	161567279	161567628	+	5.86759	NA	Intergenic	Intergenic	-14787	ENSMUST00000158728.1	ENSMUSG00000089353	ENSMUST00000158728			Gm25488			rRNA
e11ve16_cond2_659	chr1	161576265	161577022	+	6.08039	NA	Intergenic	Intergenic	-23977	ENSMUST00000158728.1	ENSMUSG00000089353	ENSMUST00000158728			Gm25488			rRNA
e11ve16_cond2_660	chr1	161601202	161601961	+	4.05846	NA	Intergenic	Intergenic	-48915	ENSMUST00000158728.1	ENSMUSG00000089353	ENSMUST00000158728			Gm25488			rRNA
e11ve16_cond2_661	chr1	161712772	161713089	+	5.3121	NA	promoter-TSS (ENSMUST00000194337.1)	TEC-promoter-TSS (ENSMUST00000194337.1)	-775	ENSMUST00000194337.1	ENSMUSG00000102860	ENSMUST00000194337			Gm37638			TEC
e11ve16_cond2_662	chr1	161748333	161749209	+	4.65896	NA	Intergenic	Intergenic	2715	ENSMUST00000195878.1	ENSMUSG00000102399	ENSMUST00000195878			Gm5049			processed_pseudogene
e11ve16_cond2_663	chr1	161809868	161810591	+	7.40226	NA	TTS (ENSMUST00000192386.1)	TEC-TTS (ENSMUST00000192386.1)	3938	ENSMUST00000192386.1	ENSMUSG00000103625	ENSMUST00000192386			Gm37357			TEC
e11ve16_cond2_664	chr1	161876586	161877354	+	10.3834	NA	promoter-TSS (ENSMUST00000048377.10)	protein_coding-promoter-TSS (ENSMUST00000048377.10)	-288	ENSMUST00000048377.10	ENSMUSG00000040297	ENSMUST00000048377			Suco			protein_coding
e11ve16_cond2_665	chr1	161913428	161914465	+	13.1266	NA	Intergenic	Intergenic	21799	ENSMUST00000194266.1	ENSMUSG00000103158	ENSMUST00000193561			Gm31925			lncRNA
e11ve16_cond2_666	chr1	162037461	162038092	+	5.38989	NA	intron (ENSMUST00000159763.7, intron 5 of 8)	protein_coding-intron (ENSMUST00000070330.13, intron 16 of 19)	32604	ENSMUST00000160555.1	ENSMUSG00000090260	ENSMUST00000160555			2810442N19Rik			lncRNA
e11ve16_cond2_667	chr1	162081861	162082717	+	8.58163	NA	intron (ENSMUST00000086074.11, intron 16 of 20)	protein_coding-intron (ENSMUST00000070330.13, intron 16 of 19)	6179	ENSMUST00000193239.1	ENSMUSG00000102994	ENSMUST00000193239			Gm37767			TEC
e11ve16_cond2_668	chr1	162257036	162257436	+	10.8074	NA	intron (ENSMUST00000159763.7, intron 2 of 8)	protein_coding-intron (ENSMUST00000070330.13, intron 13 of 19)	33868	ENSMUST00000083582.1	ENSMUSG00000065516	ENSMUST00000083582			Mir214			miRNA
e11ve16_cond2_669	chr1	162428734	162429029	+	6.54764	NA	intron (ENSMUST00000086074.11, intron 1 of 20)	protein_coding-intron (ENSMUST00000070330.13, intron 1 of 19)	-4292	ENSMUST00000161894.1	ENSMUSG00000040265	ENSMUST00000161894			Dnm3			protein_coding
e11ve16_cond2_670	chr1	162859700	162860417	+	11.4024	NA	promoter-TSS (ENSMUST00000111518.2)	protein_coding-promoter-TSS (ENSMUST00000111518.2)	-89	ENSMUST00000111518.2	ENSMUSG00000040181	ENSMUST00000111518			Fmo1			protein_coding
e11ve16_cond2_671	chr1	162886445	162887160	+	7.07331	NA	promoter-TSS (ENSMUST00000194061.1)	protein_coding-promoter-TSS (ENSMUST00000194061.1)	-287	ENSMUST00000194061.1	ENSMUSG00000040170	ENSMUST00000045902			Fmo2			protein_coding
e11ve16_cond2_672	chr1	162891991	162892553	+	5.28929	NA	intron (ENSMUST00000045902.12, intron 2 of 8)	protein_coding-intron (ENSMUST00000045902.12, intron 2 of 8)	-5757	ENSMUST00000194061.1	ENSMUSG00000040170	ENSMUST00000045902			Fmo2			protein_coding
e11ve16_cond2_673	chr1	163089898	163090116	+	5.02678	NA	Intergenic	Intergenic	-4337	ENSMUST00000096608.4	ENSMUSG00000071890	ENSMUST00000096608			Mroh9			protein_coding
e11ve16_cond2_674	chr1	163403078	163403441	+	4.69933	NA	TTS (ENSMUST00000158326.1)	snRNA-TTS (ENSMUST00000158326.1)	352	ENSMUST00000185299.1	ENSMUSG00000040124	ENSMUST00000185299			Gorab			protein_coding
e11ve16_cond2_675	chr1	163403571	163403996	+	12.4725	NA	promoter-TSS (ENSMUST00000045138.5)	protein_coding-promoter-TSS (ENSMUST00000045138.5)	-114	ENSMUST00000045138.5	ENSMUSG00000040124	ENSMUST00000185299			Gorab			protein_coding
e11ve16_cond2_676	chr1	163443512	163444138	+	5.74926	NA	Intergenic	Intergenic	-40156	ENSMUST00000045138.5	ENSMUSG00000040124	ENSMUST00000185299			Gorab			protein_coding
e11ve16_cond2_677	chr1	163563712	163564012	+	29.9744	NA	Intergenic	Intergenic	-43515	ENSMUST00000185992.1	ENSMUSG00000101869	ENSMUST00000185992			Gm29500			lncRNA
e11ve16_cond2_678	chr1	163724055	163724565	+	6.59667	NA	intron (ENSMUST00000160495.1, intron 1 of 4)	protein_coding-intron (ENSMUST00000159679.7, intron 1 of 3)	922	ENSMUST00000159679.7	ENSMUSG00000040113	ENSMUST00000160495			Mettl11b			protein_coding
e11ve16_cond2_679	chr1	163757257	163758201	+	4.90042	NA	Intergenic	Intergenic	-21854	ENSMUST00000077642.11	ENSMUSG00000026585	ENSMUST00000027877			Kifap3			protein_coding
e11ve16_cond2_680	chr1	163779507	163779925	+	3.31313	NA	exon (ENSMUST00000027877.6, exon 1 of 20)	protein_coding-exon (ENSMUST00000027877.6, exon 1 of 20)	133	ENSMUST00000027877.6	ENSMUSG00000026585	ENSMUST00000027877			Kifap3			protein_coding
e11ve16_cond2_681	chr1	163907119	163907523	+	3.61377	NA	intron (ENSMUST00000027877.6, intron 19 of 19)	protein_coding-intron (ENSMUST00000027877.6, intron 19 of 19)	-21779	ENSMUST00000161908.7	ENSMUSG00000026584	ENSMUST00000163033			Scyl3			protein_coding
e11ve16_cond2_682	chr1	163929982	163930194	+	4.3264	NA	exon (ENSMUST00000027876.10, exon 1 of 14)	protein_coding-exon (ENSMUST00000027876.10, exon 1 of 14)	283	ENSMUST00000162234.1	ENSMUSG00000026584	ENSMUST00000163033			Scyl3			protein_coding
e11ve16_cond2_683	chr1	164248968	164249321	+	9.56238	NA	promoter-TSS (ENSMUST00000044021.11)	protein_coding-promoter-TSS (ENSMUST00000044021.11)	89	ENSMUST00000159230.7	ENSMUSG00000040918	ENSMUST00000044021			Slc19a2			protein_coding
e11ve16_cond2_684	chr1	164413459	164414060	+	4.73654	NA	intron (ENSMUST00000192710.1, intron 5 of 5)	protein_coding-intron (ENSMUST00000191947.5, intron 12 of 12)	-10954	ENSMUST00000194180.1	ENSMUSG00000103493	ENSMUST00000194180			Gm37411			TEC
e11ve16_cond2_685	chr1	164448659	164449019	+	6.37849	NA	intron (ENSMUST00000193367.1, intron 1 of 2)	protein_coding-intron (ENSMUST00000027863.12, intron 2 of 5)	4938	ENSMUST00000193367.1	ENSMUSG00000026576	ENSMUST00000193367			Atp1b1			protein_coding
e11ve16_cond2_686	chr1	164456057	164456775	+	9.17848	NA	intron (ENSMUST00000027863.12, intron 1 of 5)	protein_coding-intron (ENSMUST00000027863.12, intron 1 of 5)	1606	ENSMUST00000192522.1	ENSMUSG00000026576	ENSMUST00000193367			Atp1b1			protein_coding
e11ve16_cond2_687	chr1	164458040	164458967	+	11.2786	NA	promoter-TSS (ENSMUST00000027863.12)	protein_coding-promoter-TSS (ENSMUST00000027863.12)	-148	ENSMUST00000027863.12	ENSMUSG00000026576	ENSMUST00000193367			Atp1b1			protein_coding
e11ve16_cond2_688	chr1	164521255	164521641	+	7.75816	NA	Intergenic	Intergenic	18139	ENSMUST00000181831.2	ENSMUSG00000097281	ENSMUST00000181831			Gm26685			lncRNA
e11ve16_cond2_689	chr1	164681684	164683169	+	7.0626	NA	intron (ENSMUST00000194720.1, intron 1 of 2)	lncRNA-intron (ENSMUST00000194720.1, intron 1 of 2)	444	ENSMUST00000194720.1	ENSMUSG00000102761	ENSMUST00000194720			Gm37184			lncRNA
e11ve16_cond2_690	chr1	164899140	164899363	+	3.74103	NA	intron (ENSMUST00000194322.1, intron 2 of 3)	lncRNA-intron (ENSMUST00000193955.1, intron 1 of 2)	340	ENSMUST00000193955.1	ENSMUSG00000103659	ENSMUST00000193955			Gm32569			lncRNA
e11ve16_cond2_691	chr1	165185073	165185639	+	7.84897	NA	intron (ENSMUST00000192185.5, intron 2 of 6)	protein_coding-intron (ENSMUST00000043338.9, intron 3 of 7)	8961	ENSMUST00000192565.1	ENSMUSG00000040848	ENSMUST00000192185			Sft2d2			protein_coding
e11ve16_cond2_692	chr1	165209521	165209916	+	4.24426	NA	Intergenic	Intergenic	6809	ENSMUST00000192726.1	ENSMUSG00000040843	ENSMUST00000192436			Tiprl			protein_coding
e11ve16_cond2_693	chr1	165236920	165237330	+	4.15251	NA	promoter-TSS (ENSMUST00000043235.7)	protein_coding-promoter-TSS (ENSMUST00000043235.7)	-129	ENSMUST00000192436.5	ENSMUSG00000040843	ENSMUST00000192436			Tiprl			protein_coding
e11ve16_cond2_694	chr1	165302550	165303429	+	21.3204	NA	intron (ENSMUST00000111450.2, intron 1 of 5)	protein_coding-intron (ENSMUST00000111450.2, intron 1 of 5)	366	ENSMUST00000111450.2	ENSMUSG00000040836	ENSMUST00000178700			Gpr161			protein_coding
e11ve16_cond2_695	chr1	165386276	165386555	+	3.65892	NA	intron (ENSMUST00000194869.5, intron 1 of 6)	protein_coding-intron (ENSMUST00000027856.12, intron 10 of 18)	2331	ENSMUST00000194869.5	ENSMUSG00000026571	ENSMUST00000195686			Dcaf6			protein_coding
e11ve16_cond2_696	chr1	165460434	165461280	+	8.27634	NA	promoter-TSS (ENSMUST00000027853.5)	protein_coding-promoter-TSS (ENSMUST00000027853.5)	-180	ENSMUST00000027853.5	ENSMUSG00000026568	ENSMUST00000193575			Mpc2			protein_coding
e11ve16_cond2_697	chr1	165686727	165687074	+	4.09842	NA	intron (ENSMUST00000193714.1, intron 2 of 2)	protein_coding-intron (ENSMUST00000040357.10, intron 1 of 6)	-7865	ENSMUST00000196594.1	ENSMUSG00000105249	ENSMUST00000196594			Gm44458			miRNA
e11ve16_cond2_698	chr1	165718004	165718460	+	4.67628	NA	Intergenic	Intergenic	-3324	ENSMUST00000192469.1	ENSMUSG00000103686	ENSMUST00000192469			Gm37073			lncRNA
e11ve16_cond2_699	chr1	166271269	166271639	+	5.01254	NA	intron (ENSMUST00000192426.5, intron 3 of 3)	protein_coding-intron (ENSMUST00000111416.6, intron 3 of 9)	17261	ENSMUST00000192638.5	ENSMUSG00000040612	ENSMUST00000192732			Ildr2			protein_coding
e11ve16_cond2_700	chr1	166379347	166379923	+	4.14163	NA	exon (ENSMUST00000195518.2, exon 2 of 2)	lncRNA-exon (ENSMUST00000195518.2, exon 2 of 2)	296	ENSMUST00000132817.1	ENSMUSG00000026563	ENSMUST00000138284			Tada1			protein_coding
e11ve16_cond2_701	chr1	166462450	166462831	+	7.61811	NA	Intergenic	Intergenic	-13483	ENSMUST00000195448.1	ENSMUSG00000104194	ENSMUST00000195448			Gm33354			TEC
e11ve16_cond2_702	chr1	166467104	166467305	+	6.84435	NA	Intergenic	Intergenic	-18047	ENSMUST00000195448.1	ENSMUSG00000104194	ENSMUST00000195448			Gm33354			TEC
e11ve16_cond2_703	chr1	166895691	166896049	+	5.28423	NA	Intergenic	Intergenic	50488	ENSMUST00000145247.1	ENSMUSG00000086925	ENSMUST00000145247			Gm6286			processed_pseudogene
e11ve16_cond2_704	chr1	167098755	167099042	+	3.73071	NA	Intergenic	Intergenic	-42257	ENSMUST00000192761.1	ENSMUSG00000102870	ENSMUST00000192761			Gm17868			unprocessed_pseudogene
e11ve16_cond2_705	chr1	167261587	167262685	+	10.9718	NA	intron (ENSMUST00000053686.8, intron 1 of 6)	protein_coding-intron (ENSMUST00000053686.8, intron 1 of 6)	-18978	ENSMUST00000027839.13	ENSMUSG00000026558	ENSMUST00000191745			Uck2			protein_coding
e11ve16_cond2_706	chr1	167269418	167270151	+	6.10113	NA	intron (ENSMUST00000193579.1, intron 1 of 2)	protein_coding-intron (ENSMUST00000053686.8, intron 1 of 6)	14817	ENSMUST00000192269.2	ENSMUSG00000026558	ENSMUST00000191745			Uck2			protein_coding
e11ve16_cond2_707	chr1	167349769	167350235	+	5.33568	NA	promoter-TSS (ENSMUST00000028004.10)	protein_coding-promoter-TSS (ENSMUST00000028004.10)	11	ENSMUST00000028004.10	ENSMUSG00000026687	ENSMUST00000191715			Aldh9a1			protein_coding
e11ve16_cond2_708	chr1	167393786	167394408	+	5.68625	NA	promoter-TSS (ENSMUST00000028005.2)	protein_coding-promoter-TSS (ENSMUST00000028005.2)	-256	ENSMUST00000028005.2	ENSMUSG00000026688	ENSMUST00000028005			Mgst3			protein_coding
e11ve16_cond2_709	chr1	167466337	167467341	+	10.7938	NA	promoter-TSS (ENSMUST00000036643.5)	protein_coding-promoter-TSS (ENSMUST00000036643.5)	-59	ENSMUST00000036643.5	ENSMUSG00000040485	ENSMUST00000036643			Lrrc52			protein_coding
e11ve16_cond2_710	chr1	167486970	167487560	+	16.3135	NA	Intergenic	Intergenic	-20485	ENSMUST00000036643.5	ENSMUSG00000040485	ENSMUST00000036643			Lrrc52			protein_coding
e11ve16_cond2_711	chr1	167497351	167497630	+	4.54966	NA	Intergenic	Intergenic	-30710	ENSMUST00000036643.5	ENSMUSG00000040485	ENSMUST00000036643			Lrrc52			protein_coding
e11ve16_cond2_712	chr1	168221095	168221424	+	4.29257	NA	intron (ENSMUST00000176482.1, intron 2 of 2)	protein_coding-intron (ENSMUST00000176482.1, intron 2 of 2)	-56597	ENSMUST00000097471.3	ENSMUSG00000052534	ENSMUST00000176482			Pbx1			protein_coding
e11ve16_cond2_713	chr1	168391152	168391861	+	5.45273	NA	intron (ENSMUST00000176482.1, intron 2 of 2)	protein_coding-intron (ENSMUST00000176482.1, intron 2 of 2)	39998	ENSMUST00000064438.10	ENSMUSG00000052534	ENSMUST00000176482			Pbx1			protein_coding
e11ve16_cond2_714	chr1	168432189	168432546	+	4.94713	NA	promoter-TSS (ENSMUST00000064438.10)	protein_coding-promoter-TSS (ENSMUST00000064438.10)	-97	ENSMUST00000188912.6	ENSMUSG00000052534	ENSMUST00000176482			Pbx1			protein_coding
e11ve16_cond2_715	chr1	168501950	168502402	+	5.75609	NA	Intergenic	Intergenic	11533	ENSMUST00000183804.1	ENSMUSG00000098407	ENSMUST00000183804			Mir6348			miRNA
e11ve16_cond2_716	chr1	168502531	168502788	+	3.47224	NA	Intergenic	Intergenic	12016	ENSMUST00000183804.1	ENSMUSG00000098407	ENSMUST00000183804			Mir6348			miRNA
e11ve16_cond2_717	chr1	168709396	168709929	+	3.62778	NA	Intergenic	Intergenic	-33780	ENSMUST00000194611.1	ENSMUSG00000103463	ENSMUST00000194611			1700063I16Rik			TEC
e11ve16_cond2_718	chr1	168800363	168800681	+	4.22355	NA	Intergenic	Intergenic	-124640	ENSMUST00000194611.1	ENSMUSG00000103463	ENSMUST00000194611			1700063I16Rik			TEC
e11ve16_cond2_719	chr1	169353769	169354217	+	8.08622	NA	Intergenic	Intergenic	-6361	ENSMUST00000192576.1	ENSMUSG00000103530	ENSMUST00000192576			Gm37839			lncRNA
e11ve16_cond2_720	chr1	169418566	169418793	+	3.45763	NA	Intergenic	Intergenic	35190	ENSMUST00000076828.1	ENSMUSG00000058622	ENSMUST00000076828			Gm5265			processed_pseudogene
e11ve16_cond2_721	chr1	169479921	169480396	+	5.58975	NA	Intergenic	Intergenic	-26289	ENSMUST00000076828.1	ENSMUSG00000058622	ENSMUST00000076828			Gm5265			processed_pseudogene
e11ve16_cond2_722	chr1	169531611	169532063	+	4.8222	NA	promoter-TSS (ENSMUST00000028000.12)	protein_coding-promoter-TSS (ENSMUST00000028000.12)	-373	ENSMUST00000111368.7	ENSMUSG00000026683	ENSMUST00000028000			Nuf2			protein_coding
e11ve16_cond2_723	chr1	169688022	169688267	+	4.68335	NA	intron (ENSMUST00000027997.8, intron 3 of 4)	protein_coding-intron (ENSMUST00000027997.8, intron 3 of 4)	32622	ENSMUST00000152809.2	ENSMUSG00000026678	ENSMUST00000027997			Rgs5			protein_coding
e11ve16_cond2_724	chr1	169704091	169704701	+	4.86488	NA	Intergenic	Intergenic	43227	ENSMUST00000132567.1	ENSMUSG00000038530	ENSMUST00000132567			Rgs4			protein_coding
e11ve16_cond2_725	chr1	169934246	169934608	+	5.14808	NA	promoter-TSS (ENSMUST00000159701.1)	lncRNA-promoter-TSS (ENSMUST00000159701.1)	-179	ENSMUST00000159701.1	ENSMUSG00000089990	ENSMUST00000159701			Gm15852			lncRNA
e11ve16_cond2_726	chr1	169969005	169969516	+	5.64441	NA	promoter-TSS (ENSMUST00000027989.12)	protein_coding-promoter-TSS (ENSMUST00000027989.12)	-19	ENSMUST00000111353.3	ENSMUSG00000026675	ENSMUST00000123230			Hsd17b7			protein_coding
e11ve16_cond2_727	chr1	170163542	170164262	+	14.0143	NA	intron (ENSMUST00000162253.6, intron 2 of 6)	protein_coding-intron (ENSMUST00000027981.7, intron 2 of 10)	-1951	ENSMUST00000160848.1	ENSMUSG00000026670	ENSMUST00000027981			Uap1			protein_coding
e11ve16_cond2_728	chr1	170174595	170175423	+	16.894	NA	promoter-TSS (ENSMUST00000027981.7)	protein_coding-promoter-TSS (ENSMUST00000027981.7)	-52	ENSMUST00000111350.9	ENSMUSG00000026670	ENSMUST00000027981			Uap1			protein_coding
e11ve16_cond2_729	chr1	170214980	170215254	+	5.4272	NA	promoter-TSS (ENSMUST00000150821.7)	protein_coding-promoter-TSS (ENSMUST00000150821.7)	257	ENSMUST00000194988.1	ENSMUSG00000044306	ENSMUST00000194988			4930500M09Rik			lncRNA
e11ve16_cond2_730	chr1	170392526	170393707	+	45.5618	NA	intron (ENSMUST00000161485.1, intron 2 of 7)	protein_coding-intron (ENSMUST00000159665.1, intron 2 of 3)	61798	ENSMUST00000160816.7	ENSMUSG00000038473	ENSMUST00000161485			Nos1ap			protein_coding
e11ve16_cond2_731	chr1	170407529	170407750	+	6.45676	NA	intron (ENSMUST00000161485.1, intron 2 of 7)	protein_coding-intron (ENSMUST00000159665.1, intron 2 of 3)	47275	ENSMUST00000160816.7	ENSMUSG00000038473	ENSMUST00000161485			Nos1ap			protein_coding
e11ve16_cond2_732	chr1	170459808	170460058	+	3.96896	NA	intron (ENSMUST00000161485.1, intron 2 of 7)	protein_coding-intron (ENSMUST00000159665.1, intron 2 of 3)	-5019	ENSMUST00000160816.7	ENSMUSG00000038473	ENSMUST00000161485			Nos1ap			protein_coding
e11ve16_cond2_733	chr1	170460168	170460605	+	4.21487	NA	intron (ENSMUST00000161485.1, intron 2 of 7)	protein_coding-intron (ENSMUST00000159665.1, intron 2 of 3)	-5472	ENSMUST00000160816.7	ENSMUSG00000038473	ENSMUST00000161485			Nos1ap			protein_coding
e11ve16_cond2_734	chr1	170548903	170549625	+	8.81356	NA	intron (ENSMUST00000161485.1, intron 1 of 7)	protein_coding-intron (ENSMUST00000159665.1, intron 1 of 3)	7846	ENSMUST00000160466.7	ENSMUSG00000038473	ENSMUST00000161485			Nos1ap			protein_coding
e11ve16_cond2_735	chr1	170646470	170646750	+	4.99226	NA	intron (ENSMUST00000046792.8, intron 1 of 7)	protein_coding-intron (ENSMUST00000046792.8, intron 1 of 7)	2078	ENSMUST00000046792.8	ENSMUSG00000038463	ENSMUST00000046792			Olfml2b			protein_coding
e11ve16_cond2_736	chr1	170771007	170771781	+	8.18735	NA	intron (ENSMUST00000027974.6, intron 14 of 15)	protein_coding-intron (ENSMUST00000027974.6, intron 14 of 15)	-19571	ENSMUST00000180190.1	ENSMUSG00000096310	ENSMUST00000180190			Gm23523			snRNA
e11ve16_cond2_737	chr1	171063880	171066000	+	524.958	NA	promoter-TSS (ENSMUST00000164179.1)	protein_coding-promoter-TSS (ENSMUST00000164179.1)	-5	ENSMUST00000164179.1	ENSMUSG00000059498	ENSMUST00000169017			Fcgr3			protein_coding
e11ve16_cond2_738	chr1	171071836	171073329	+	405.843	NA	promoter-TSS (ENSMUST00000183351.1)	miRNA-promoter-TSS (ENSMUST00000183351.1)	-295	ENSMUST00000183351.1	ENSMUSG00000098356	ENSMUST00000183351			Gm27552			miRNA
e11ve16_cond2_739	chr1	171074405	171074717	+	311.417	NA	Intergenic	Intergenic	-2274	ENSMUST00000183351.1	ENSMUSG00000098356	ENSMUST00000183351			Gm27552			miRNA
e11ve16_cond2_740	chr1	171078018	171078534	+	366.515	NA	Intergenic	Intergenic	1625	ENSMUST00000183613.1	ENSMUSG00000098965	ENSMUST00000183613			Gm27844			miRNA
e11ve16_cond2_741	chr1	171078671	171080957	+	359.055	NA	promoter-TSS (ENSMUST00000183613.1)	miRNA-promoter-TSS (ENSMUST00000183613.1)	87	ENSMUST00000183613.1	ENSMUSG00000098965	ENSMUST00000183613			Gm27844			miRNA
e11ve16_cond2_742	chr1	171094596	171094801	+	4.19199	NA	Intergenic	Intergenic	-14797	ENSMUST00000183613.1	ENSMUSG00000098965	ENSMUST00000183613			Gm27844			miRNA
e11ve16_cond2_743	chr1	171184374	171184608	+	6.99958	NA	intron (ENSMUST00000111332.1, intron 1 of 2)	protein_coding-intron (ENSMUST00000111332.1, intron 1 of 2)	11777	ENSMUST00000111332.1	ENSMUSG00000038370	ENSMUST00000111332			Pcp4l1			protein_coding
e11ve16_cond2_744	chr1	171232995	171233306	+	5.63943	NA	intron (ENSMUST00000150997.1, intron 1 of 1)	protein_coding-intron (ENSMUST00000079957.11, intron 1 of 4)	1157	ENSMUST00000193973.1	ENSMUSG00000058715	ENSMUST00000079957			Fcer1g			protein_coding
e11ve16_cond2_745	chr1	171369923	171370370	+	9.75986	NA	promoter-TSS (ENSMUST00000006578.9)	protein_coding-promoter-TSS (ENSMUST00000006578.9)	47	ENSMUST00000111286.8	ENSMUSG00000006411	ENSMUST00000006578			Nectin4			protein_coding
e11ve16_cond2_746	chr1	171440164	171440457	+	16.7697	NA	intron (ENSMUST00000144497.1, intron 1 of 2)	protein_coding-intron (ENSMUST00000043839.4, intron 1 of 9)	2731	ENSMUST00000144497.1	ENSMUSG00000038235	ENSMUST00000144497			F11r			protein_coding
e11ve16_cond2_747	chr1	171470501	171471134	+	5.03035	NA	Intergenic	Intergenic	7967	ENSMUST00000155913.1	ENSMUSG00000038235	ENSMUST00000144497			F11r			protein_coding
e11ve16_cond2_748	chr1	171515318	171515821	+	5.83816	NA	intron (ENSMUST00000043170.3, intron 1 of 2)	unprocessed_pseudogene-intron (ENSMUST00000043170.3, intron 1 of 2)	336	ENSMUST00000043170.3	ENSMUSG00000038218	ENSMUST00000043170			Gm9765			unprocessed_pseudogene
e11ve16_cond2_749	chr1	171761858	171762469	+	5.16406	NA	Intergenic	Intergenic	-4964	ENSMUST00000015460.4	ENSMUSG00000015316	ENSMUST00000015460			Slamf1			protein_coding
e11ve16_cond2_750	chr1	171788198	171789322	+	12.0173	NA	intron (ENSMUST00000163992.2, intron 4 of 4)	protein_coding-intron (ENSMUST00000015460.4, intron 4 of 6)	21605	ENSMUST00000163992.2	ENSMUSG00000015316	ENSMUST00000015460			Slamf1			protein_coding
e11ve16_cond2_751	chr1	172019150	172019748	+	7.2175	NA	intron (ENSMUST00000111264.7, intron 1 of 8)	protein_coding-intron (ENSMUST00000027837.12, intron 1 of 7)	7262	ENSMUST00000153662.7	ENSMUSG00000026556	ENSMUST00000027837			Vangl2			protein_coding
e11ve16_cond2_752	chr1	172296039	172296369	+	4.19584	NA	intron (ENSMUST00000097464.3, intron 1 of 19)	protein_coding-intron (ENSMUST00000085913.10, intron 1 of 22)	1860	ENSMUST00000137679.2	ENSMUSG00000007097	ENSMUST00000191781			Atp1a2			protein_coding
e11ve16_cond2_753	chr1	172311619	172312320	+	6.70372	NA	promoter-TSS (ENSMUST00000039506.14)	protein_coding-promoter-TSS (ENSMUST00000039506.14)	31	ENSMUST00000128508.7	ENSMUSG00000038034	ENSMUST00000195659			Igsf8			protein_coding
e11ve16_cond2_754	chr1	172345144	172345871	+	4.89332	NA	intron (ENSMUST00000056136.3, intron 1 of 1)	protein_coding-intron (ENSMUST00000056136.3, intron 1 of 1)	4297	ENSMUST00000056136.3	ENSMUSG00000044708	ENSMUST00000056136			Kcnj10			protein_coding
e11ve16_cond2_755	chr1	172462641	172463011	+	6.71687	NA	intron (ENSMUST00000192784.1, intron 3 of 3)	transcribed_processed_pseudogene-intron (ENSMUST00000192784.1, intron 3 of 3)	4257	ENSMUST00000192784.1	ENSMUSG00000103357	ENSMUST00000192784			Gm7804			transcribed_processed_pseudogene
e11ve16_cond2_756	chr1	172513442	172514318	+	6.91719	NA	exon (ENSMUST00000195877.1, exon 1 of 1)	TEC-exon (ENSMUST00000195877.1, exon 1 of 1)	631	ENSMUST00000195877.1	ENSMUSG00000104351	ENSMUST00000195877			Gm37125			TEC
e11ve16_cond2_757	chr1	172632531	172633220	+	6.17726	NA	promoter-TSS (ENSMUST00000027826.6)	protein_coding-promoter-TSS (ENSMUST00000027826.6)	87	ENSMUST00000027826.6	ENSMUSG00000026544	ENSMUST00000027826			Dusp23			protein_coding
e11ve16_cond2_758	chr1	173313660	173313914	+	3.7644	NA	Intergenic	Intergenic	19715	ENSMUST00000038227.5	ENSMUSG00000037872	ENSMUST00000038227			Ackr1			protein_coding
e11ve16_cond2_759	chr1	174170473	174171393	+	10.1312	NA	Intergenic	Intergenic	-1843	ENSMUST00000027817.7	ENSMUSG00000026532	ENSMUST00000027817			Spta1			protein_coding
e11ve16_cond2_760	chr1	174529062	174529275	+	4.53568	NA	intron (ENSMUST00000030039.12, intron 1 of 17)	protein_coding-intron (ENSMUST00000030039.12, intron 1 of 17)	-7877	ENSMUST00000191821.1	ENSMUSG00000028354	ENSMUST00000030039			Fmn2			protein_coding
e11ve16_cond2_761	chr1	174703689	174704347	+	6.05752	NA	intron (ENSMUST00000030039.12, intron 13 of 17)	protein_coding-intron (ENSMUST00000030039.12, intron 13 of 17)	-10308	ENSMUST00000193905.1	ENSMUSG00000028354	ENSMUST00000030039			Fmn2			protein_coding
e11ve16_cond2_762	chr1	174759575	174759840	+	6.75236	NA	intron (ENSMUST00000030039.12, intron 15 of 17)	protein_coding-intron (ENSMUST00000030039.12, intron 15 of 17)	45381	ENSMUST00000193905.1	ENSMUSG00000028354	ENSMUST00000030039			Fmn2			protein_coding
e11ve16_cond2_763	chr1	174860534	174860921	+	5.58744	NA	intron (ENSMUST00000055294.3, intron 1 of 1)	protein_coding-intron (ENSMUST00000055294.3, intron 1 of 1)	61092	ENSMUST00000055294.3	ENSMUSG00000050069	ENSMUST00000055294			Grem2			protein_coding
e11ve16_cond2_764	chr1	174907490	174908574	+	30.8551	NA	intron (ENSMUST00000055294.3, intron 1 of 1)	protein_coding-intron (ENSMUST00000055294.3, intron 1 of 1)	13787	ENSMUST00000055294.3	ENSMUSG00000050069	ENSMUST00000055294			Grem2			protein_coding
e11ve16_cond2_765	chr1	174914229	174914727	+	8.36736	NA	intron (ENSMUST00000055294.3, intron 1 of 1)	protein_coding-intron (ENSMUST00000055294.3, intron 1 of 1)	7341	ENSMUST00000055294.3	ENSMUSG00000050069	ENSMUST00000055294			Grem2			protein_coding
e11ve16_cond2_766	chr1	174951018	174951333	+	6.66675	NA	Intergenic	Intergenic	-29356	ENSMUST00000055294.3	ENSMUSG00000050069	ENSMUST00000055294			Grem2			protein_coding
e11ve16_cond2_767	chr1	174951505	174951875	+	4.53696	NA	Intergenic	Intergenic	-29871	ENSMUST00000055294.3	ENSMUSG00000050069	ENSMUST00000055294			Grem2			protein_coding
e11ve16_cond2_768	chr1	175625261	175625859	+	8.98392	NA	promoter-TSS (ENSMUST00000027810.13)	protein_coding-promoter-TSS (ENSMUST00000027810.13)	13	ENSMUST00000154956.2	ENSMUSG00000026526	ENSMUST00000176740			Fh1			protein_coding
e11ve16_cond2_769	chr1	175692303	175693779	+	21.0492	NA	promoter-TSS (ENSMUST00000027809.7)	protein_coding-promoter-TSS (ENSMUST00000027809.7)	-140	ENSMUST00000210367.1	ENSMUSG00000078185	ENSMUST00000211489			Chml			protein_coding
e11ve16_cond2_770	chr1	175880523	175880806	+	5.75693	NA	promoter-TSS (ENSMUST00000039725.11)	protein_coding-promoter-TSS (ENSMUST00000039725.11)	83	ENSMUST00000039725.11	ENSMUSG00000039748	ENSMUST00000039725			Exo1			protein_coding
e11ve16_cond2_771	chr1	175893527	175893973	+	9.74284	NA	exon (ENSMUST00000039725.11, exon 9 of 15)	protein_coding-exon (ENSMUST00000039725.11, exon 9 of 15)	868	ENSMUST00000191680.1	ENSMUSG00000039748	ENSMUST00000039725			Exo1			protein_coding
e11ve16_cond2_772	chr1	175988551	175988975	+	5.35356	NA	intron (ENSMUST00000125404.7, intron 5 of 8)	protein_coding-intron (ENSMUST00000065967.13, intron 6 of 9)	-9649	ENSMUST00000104983.1	ENSMUSG00000078184	ENSMUST00000104983			Rbm8a2			protein_coding
e11ve16_cond2_773	chr1	176053598	176053820	+	3.84789	NA	intron (ENSMUST00000125404.7, intron 3 of 8)	protein_coding-intron (ENSMUST00000065967.13, intron 4 of 9)	-20986	ENSMUST00000192680.1	ENSMUSG00000104363	ENSMUST00000192680			Gm38081			TEC
e11ve16_cond2_774	chr1	176075558	176075857	+	3.5289	NA	intron (ENSMUST00000125404.7, intron 2 of 8)	protein_coding-intron (ENSMUST00000065967.13, intron 3 of 9)	-42984	ENSMUST00000192680.1	ENSMUSG00000104363	ENSMUST00000192680			Gm38081			TEC
e11ve16_cond2_775	chr1	176110469	176111365	+	6.01992	NA	intron (ENSMUST00000065967.13, intron 2 of 9)	protein_coding-intron (ENSMUST00000065967.13, intron 2 of 9)	-68284	ENSMUST00000192153.1	ENSMUSG00000103277	ENSMUST00000192153			Gm37916			TEC
e11ve16_cond2_776	chr1	176145350	176145564	+	4.48575	NA	intron (ENSMUST00000144340.7, intron 1 of 5)	protein_coding-intron (ENSMUST00000065967.13, intron 1 of 9)	-33744	ENSMUST00000192153.1	ENSMUSG00000103277	ENSMUST00000192153			Gm37916			TEC
e11ve16_cond2_777	chr1	176814065	176815033	+	10.9803	NA	promoter-TSS (ENSMUST00000027785.14)	protein_coding-promoter-TSS (ENSMUST00000027785.14)	-111	ENSMUST00000150429.7	ENSMUSG00000026504	ENSMUST00000133305			Sdccag8			protein_coding
e11ve16_cond2_778	chr1	177007276	177007712	+	8.69039	NA	intron (ENSMUST00000139589.1, intron 1 of 2)	protein_coding-intron (ENSMUST00000027785.14, intron 16 of 17)	9485	ENSMUST00000139589.1	ENSMUSG00000026504	ENSMUST00000133305			Sdccag8			protein_coding
e11ve16_cond2_779	chr1	177203446	177203647	+	4.09143	NA	intron (ENSMUST00000019843.14, intron 1 of 12)	protein_coding-intron (ENSMUST00000019843.14, intron 1 of 12)	27140	ENSMUST00000193819.1	ENSMUSG00000102427	ENSMUST00000193819			Gm37463			TEC
e11ve16_cond2_780	chr1	177441469	177442125	+	15.9471	NA	promoter-TSS (ENSMUST00000194319.1)	protein_coding-promoter-TSS (ENSMUST00000194319.1)	-554	ENSMUST00000195002.1	ENSMUSG00000063659	ENSMUST00000193480			Zbtb18			protein_coding
e11ve16_cond2_781	chr1	177479077	177480025	+	8.42743	NA	Intergenic	Intergenic	12173	ENSMUST00000193447.1	ENSMUSG00000103043	ENSMUST00000193447			Gm37306			lncRNA
e11ve16_cond2_782	chr1	177648976	177649475	+	5.91498	NA	Intergenic	Intergenic	-6282	ENSMUST00000189507.1	ENSMUSG00000101746	ENSMUST00000189507			2310043L19Rik			lncRNA
e11ve16_cond2_783	chr1	177708477	177709063	+	12.6817	NA	Intergenic	Intergenic	-21044	ENSMUST00000016106.5	ENSMUSG00000015962	ENSMUST00000016106			1700016C15Rik			protein_coding
e11ve16_cond2_784	chr1	177796266	177796867	+	9.86543	NA	promoter-TSS (ENSMUST00000016105.8)	protein_coding-promoter-TSS (ENSMUST00000016105.8)	-55	ENSMUST00000016105.8	ENSMUSG00000015961	ENSMUST00000159184			Adss			protein_coding
e11ve16_cond2_785	chr1	177983095	177984036	+	15.1667	NA	exon (ENSMUST00000191719.5, exon 1 of 20)	protein_coding-exon (ENSMUST00000191719.5, exon 1 of 20)	142	ENSMUST00000191719.5	ENSMUSG00000091476	ENSMUST00000239149			Catspere2			protein_coding
e11ve16_cond2_786	chr1	178187436	178187696	+	5.46402	NA	promoter-TSS (ENSMUST00000027783.13)	protein_coding-promoter-TSS (ENSMUST00000027783.13)	34	ENSMUST00000027783.13	ENSMUSG00000026502	ENSMUST00000161075			Desi2			protein_coding
e11ve16_cond2_787	chr1	178195154	178195569	+	11.274	NA	intron (ENSMUST00000027783.13, intron 1 of 4)	protein_coding-intron (ENSMUST00000027783.13, intron 1 of 4)	7514	ENSMUST00000159284.1	ENSMUSG00000026502	ENSMUST00000161075			Desi2			protein_coding
e11ve16_cond2_788	chr1	178358197	178358418	+	3.78901	NA	Intergenic	Intergenic	5214	ENSMUST00000185108.1	ENSMUSG00000099303	ENSMUST00000185108			Gm27458			miRNA
e11ve16_cond2_789	chr1	178406084	178406497	+	3.36265	NA	intron (ENSMUST00000027775.8, intron 1 of 6)	protein_coding-intron (ENSMUST00000027775.8, intron 1 of 6)	187	ENSMUST00000027775.8	ENSMUSG00000026495	ENSMUST00000027775			Efcab2			protein_coding
e11ve16_cond2_790	chr1	178600510	178601480	+	14.1779	NA	intron (ENSMUST00000193931.1, intron 2 of 3)	protein_coding-intron (ENSMUST00000161017.7, intron 2 of 14)	-35910	ENSMUST00000083033.1	ENSMUSG00000064967	ENSMUST00000083033			Gm24405			snRNA
e11ve16_cond2_791	chr1	178821273	178821503	+	6.51379	NA	intron (ENSMUST00000160789.1, intron 1 of 11)	protein_coding-intron (ENSMUST00000160789.1, intron 1 of 11)	22950	ENSMUST00000160789.1	ENSMUSG00000026494	ENSMUST00000193931			Kif26b			protein_coding
e11ve16_cond2_792	chr1	179041363	179042291	+	18.4963	NA	intron (ENSMUST00000131684.7, intron 6 of 7)	protein_coding-intron (ENSMUST00000068437.12, intron 7 of 8)	-52482	ENSMUST00000129393.1	ENSMUSG00000055067	ENSMUST00000111134			Smyd3			protein_coding
e11ve16_cond2_793	chr1	179045947	179046678	+	16.6913	NA	intron (ENSMUST00000128302.7, intron 9 of 11)	protein_coding-intron (ENSMUST00000068437.12, intron 6 of 8)	-56967	ENSMUST00000129393.1	ENSMUSG00000055067	ENSMUST00000111134			Smyd3			protein_coding
e11ve16_cond2_794	chr1	179136555	179137307	+	8.14273	NA	intron (ENSMUST00000128302.7, intron 5 of 11)	protein_coding-intron (ENSMUST00000068437.12, intron 2 of 8)	111909	ENSMUST00000068437.12	ENSMUSG00000055067	ENSMUST00000111134			Smyd3			protein_coding
e11ve16_cond2_795	chr1	179546237	179546680	+	5.83334	NA	promoter-TSS (ENSMUST00000027769.5)	protein_coding-promoter-TSS (ENSMUST00000027769.5)	-41	ENSMUST00000144370.1	ENSMUSG00000038949	ENSMUST00000040706			Cnst			protein_coding
e11ve16_cond2_796	chr1	179803222	179803796	+	4.62716	NA	promoter-TSS (ENSMUST00000147137.1)	protein_coding-promoter-TSS (ENSMUST00000147137.1)	97	ENSMUST00000147137.1	ENSMUSG00000026491	ENSMUST00000151734			Ahctf1			protein_coding
e11ve16_cond2_797	chr1	179847918	179848258	+	3.41786	NA	Intergenic	Intergenic	-44408	ENSMUST00000027768.13	ENSMUSG00000026491	ENSMUST00000151734			Ahctf1			protein_coding
e11ve16_cond2_798	chr1	180279159	180280250	+	14.8965	NA	Intergenic	Intergenic	-16266	ENSMUST00000133340.1	ENSMUSG00000010609	ENSMUST00000128223			Psen2			protein_coding
e11ve16_cond2_799	chr1	180403908	180404342	+	5.15732	NA	intron (ENSMUST00000070181.6, intron 2 of 7)	protein_coding-intron (ENSMUST00000070181.6, intron 2 of 7)	27681	ENSMUST00000194945.1	ENSMUSG00000103772	ENSMUST00000194945			Gm36933			TEC
e11ve16_cond2_800	chr1	180865952	180866338	+	4.45204	NA	exon (ENSMUST00000038091.7, exon 7 of 7)	protein_coding-exon (ENSMUST00000038091.7, exon 7 of 7)	4045	ENSMUST00000194948.1	ENSMUSG00000038806	ENSMUST00000194948			Sde2			protein_coding
e11ve16_cond2_801	chr1	180888523	180888919	+	6.55649	NA	Intergenic	Intergenic	-4387	ENSMUST00000085797.5	ENSMUSG00000066652	ENSMUST00000085797			Lefty2			protein_coding
e11ve16_cond2_802	chr1	181256912	181257167	+	3.30804	NA	Intergenic	Intergenic	-14719	ENSMUST00000117444.1	ENSMUSG00000081214	ENSMUST00000117444			Rpl35a-ps2			processed_pseudogene
e11ve16_cond2_803	chr1	181440976	181442286	+	20.5822	NA	intron (ENSMUST00000209607.1, intron 3 of 5)	protein_coding-intron (ENSMUST00000027795.13, intron 3 of 5)	-9231	ENSMUST00000160086.1	ENSMUSG00000089927	ENSMUST00000160086			Gm16539			unprocessed_pseudogene
e11ve16_cond2_804	chr1	181743220	181743627	+	63.6423	NA	intron (ENSMUST00000160793.1, intron 1 of 3)	protein_coding-intron (ENSMUST00000097446.8, intron 2 of 8)	683	ENSMUST00000160793.1	ENSMUSG00000047369	ENSMUST00000194470			Dnah14			protein_coding
e11ve16_cond2_805	chr1	181841862	181842557	+	8.35882	NA	intron (ENSMUST00000191878.5, intron 1 of 4)	protein_coding-intron (ENSMUST00000005003.11, intron 1 of 13)	117	ENSMUST00000193028.1	ENSMUSG00000004880	ENSMUST00000193030			Lbr			protein_coding
e11ve16_cond2_806	chr1	182237637	182237925	+	7.63505	NA	Intergenic	Intergenic	44443	ENSMUST00000133052.1	ENSMUSG00000038633	ENSMUST00000132551			Degs1			protein_coding
e11ve16_cond2_807	chr1	182255578	182256204	+	4.69193	NA	Intergenic	Intergenic	26333	ENSMUST00000133052.1	ENSMUSG00000038633	ENSMUST00000132551			Degs1			protein_coding
e11ve16_cond2_808	chr1	182367973	182368309	+	4.34726	NA	Intergenic	Intergenic	25394	ENSMUST00000181525.1	ENSMUSG00000097260	ENSMUST00000181525			Gm5706			processed_pseudogene
e11ve16_cond2_809	chr1	182398766	182399236	+	5.23888	NA	Intergenic	Intergenic	-5466	ENSMUST00000181525.1	ENSMUSG00000097260	ENSMUST00000181525			Gm5706			processed_pseudogene
e11ve16_cond2_810	chr1	182908149	182908557	+	7.4036	NA	exon (ENSMUST00000192563.1, exon 1 of 1)	TEC-exon (ENSMUST00000192563.1, exon 1 of 1)	643	ENSMUST00000192563.1	ENSMUSG00000102291	ENSMUST00000192563			Gm37542			TEC
e11ve16_cond2_811	chr1	183118358	183119155	+	10.8881	NA	intron (ENSMUST00000195372.1, intron 3 of 8)	protein_coding-intron (ENSMUST00000003035.11, intron 4 of 9)	28705	ENSMUST00000171366.6	ENSMUSG00000030768	ENSMUST00000003035			Disp1			protein_coding
e11ve16_cond2_812	chr1	183133489	183134552	+	6.66527	NA	intron (ENSMUST00000195372.1, intron 3 of 8)	protein_coding-intron (ENSMUST00000003035.11, intron 4 of 9)	13441	ENSMUST00000171366.6	ENSMUSG00000030768	ENSMUST00000003035			Disp1			protein_coding
e11ve16_cond2_813	chr1	183345001	183345293	+	3.7278	NA	intron (ENSMUST00000069922.8, intron 2 of 22)	protein_coding-intron (ENSMUST00000069922.8, intron 2 of 22)	149	ENSMUST00000109158.8	ENSMUSG00000056050	ENSMUST00000194543			Mia3			protein_coding
e11ve16_cond2_814	chr1	183680004	183680380	+	5.66912	NA	Intergenic	Intergenic	1939	ENSMUST00000172123.2	ENSMUSG00000090533	ENSMUST00000172123			Gm8214			processed_pseudogene
e11ve16_cond2_815	chr1	183702798	183703166	+	4.0759	NA	Intergenic	Intergenic	-20851	ENSMUST00000172123.2	ENSMUSG00000090533	ENSMUST00000172123			Gm8214			processed_pseudogene
e11ve16_cond2_816	chr1	183949155	183949589	+	3.61053	NA	Intergenic	Intergenic	20967	ENSMUST00000193891.1	ENSMUSG00000102743	ENSMUST00000193891			Gm38108			lncRNA
e11ve16_cond2_817	chr1	184033599	184034465	+	11.6021	NA	promoter-TSS (ENSMUST00000048655.7)	protein_coding-promoter-TSS (ENSMUST00000048655.7)	-34	ENSMUST00000050306.7	ENSMUSG00000044854	ENSMUST00000050306			1700056E22Rik			protein_coding
e11ve16_cond2_818	chr1	184845507	184846182	+	3.71003	NA	promoter-TSS (ENSMUST00000068725.9)	protein_coding-promoter-TSS (ENSMUST00000068725.9)	3	ENSMUST00000160982.1	ENSMUSG00000073481	ENSMUST00000160982			2021-03-02			protein_coding
e11ve16_cond2_819	chr1	184870191	184870650	+	4.2923	NA	Intergenic	Intergenic	-12008	ENSMUST00000157937.2	ENSMUSG00000088562	ENSMUST00000157937			Gm23780			misc_RNA
e11ve16_cond2_820	chr1	184946728	184947148	+	4.1203	NA	intron (ENSMUST00000027929.9, intron 1 of 17)	protein_coding-intron (ENSMUST00000027929.9, intron 1 of 17)	23802	ENSMUST00000192968.1	ENSMUSG00000102784	ENSMUST00000192968			Gm38251			lncRNA
e11ve16_cond2_821	chr1	185203919	185204150	+	5.08678	NA	promoter-TSS (ENSMUST00000069652.7)	protein_coding-promoter-TSS (ENSMUST00000069652.7)	-83	ENSMUST00000194740.5	ENSMUSG00000039318	ENSMUST00000069652			Rab3gap2			protein_coding
e11ve16_cond2_822	chr1	185227639	185228146	+	13.1982	NA	intron (ENSMUST00000069652.7, intron 2 of 34)	protein_coding-intron (ENSMUST00000069652.7, intron 2 of 34)	-15015	ENSMUST00000104383.1	ENSMUSG00000077571	ENSMUST00000104383			Snora36b			snoRNA
e11ve16_cond2_823	chr1	185235474	185236723	+	13.8785	NA	intron (ENSMUST00000194740.5, intron 7 of 34)	protein_coding-intron (ENSMUST00000069652.7, intron 7 of 34)	-6809	ENSMUST00000104383.1	ENSMUSG00000077571	ENSMUST00000104383			Snora36b			snoRNA
e11ve16_cond2_824	chr1	185930256	185930684	+	9.3526	NA	Intergenic	Intergenic	-51585	ENSMUST00000194568.1	ENSMUSG00000102546	ENSMUST00000194568			Gm9722			processed_pseudogene
e11ve16_cond2_825	chr1	185957594	185957806	+	9.72601	NA	Intergenic	Intergenic	-78815	ENSMUST00000194568.1	ENSMUSG00000102546	ENSMUST00000194568			Gm9722			processed_pseudogene
e11ve16_cond2_826	chr1	185964647	185964861	+	3.8581	NA	Intergenic	Intergenic	-85869	ENSMUST00000194568.1	ENSMUSG00000102546	ENSMUST00000194568			Gm9722			processed_pseudogene
e11ve16_cond2_827	chr1	186137995	186138672	+	5.30198	NA	Intergenic	Intergenic	15132	ENSMUST00000158738.1	ENSMUSG00000089363	ENSMUST00000158738			Gm23821			rRNA
e11ve16_cond2_828	chr1	186341664	186342602	+	14.6366	NA	Intergenic	Intergenic	-5182	ENSMUST00000192552.1	ENSMUSG00000102217	ENSMUST00000192552			Gm37491			TEC
e11ve16_cond2_829	chr1	186417281	186417547	+	6.12134	NA	Intergenic	Intergenic	70099	ENSMUST00000192552.1	ENSMUSG00000102217	ENSMUST00000192552			Gm37491			TEC
e11ve16_cond2_830	chr1	186432015	186432421	+	7.60965	NA	Intergenic	Intergenic	84903	ENSMUST00000192552.1	ENSMUSG00000102217	ENSMUST00000192552			Gm37491			TEC
e11ve16_cond2_831	chr1	186444671	186444899	+	6.78054	NA	Intergenic	Intergenic	97470	ENSMUST00000192552.1	ENSMUSG00000102217	ENSMUST00000192552			Gm37491			TEC
e11ve16_cond2_832	chr1	186618226	186618718	+	4.1288	NA	Intergenic	Intergenic	31518	ENSMUST00000191766.5	ENSMUSG00000039239	ENSMUST00000193640			Tgfb2			protein_coding
e11ve16_cond2_833	chr1	186637845	186638244	+	4.43729	NA	intron (ENSMUST00000045288.13, intron 2 of 6)	protein_coding-intron (ENSMUST00000045288.13, intron 2 of 6)	11946	ENSMUST00000191766.5	ENSMUSG00000039239	ENSMUST00000193640			Tgfb2			protein_coding
e11ve16_cond2_834	chr1	186663106	186663875	+	16.332	NA	intron (ENSMUST00000045288.13, intron 1 of 6)	protein_coding-intron (ENSMUST00000045288.13, intron 1 of 6)	4665	ENSMUST00000194593.1	ENSMUSG00000039239	ENSMUST00000193640			Tgfb2			protein_coding
e11ve16_cond2_835	chr1	187048853	187049614	+	10.8523	NA	intron (ENSMUST00000027908.12, intron 9 of 9)	protein_coding-intron (ENSMUST00000027908.12, intron 9 of 9)	24102	ENSMUST00000160330.1	ENSMUSG00000089831	ENSMUST00000160330			Gm15508			processed_pseudogene
e11ve16_cond2_836	chr1	187053944	187054623	+	7.36376	NA	intron (ENSMUST00000027908.12, intron 9 of 9)	protein_coding-intron (ENSMUST00000027908.12, intron 9 of 9)	19052	ENSMUST00000160330.1	ENSMUSG00000089831	ENSMUST00000160330			Gm15508			processed_pseudogene
e11ve16_cond2_837	chr1	187134461	187134905	+	6.11894	NA	TTS (ENSMUST00000110945.3)	protein_coding-TTS (ENSMUST00000110945.3)	8221	ENSMUST00000183996.7	ENSMUSG00000026611	ENSMUST00000183931			Spata17			protein_coding
e11ve16_cond2_838	chr1	187291736	187292190	+	7.05363	NA	intron (ENSMUST00000161260.7, intron 6 of 6)	protein_coding-intron (ENSMUST00000065573.13, intron 5 of 9)	55506	ENSMUST00000193542.2	ENSMUSG00000104394	ENSMUST00000193542			Gm37254			TEC
e11ve16_cond2_839	chr1	187703270	187703514	+	10.4523	NA	intron (ENSMUST00000152927.1, intron 1 of 1)	protein_coding-intron (ENSMUST00000110939.7, intron 1 of 7)	-9413	ENSMUST00000238811.1	ENSMUSG00000118492	ENSMUST00000238811			AC121143.1			processed_pseudogene
e11ve16_cond2_840	chr1	187794309	187795104	+	9.91585	NA	TTS (ENSMUST00000152927.1)	protein_coding-TTS (ENSMUST00000152927.1)	81901	ENSMUST00000238811.1	ENSMUSG00000118492	ENSMUST00000238811			AC121143.1			processed_pseudogene
e11ve16_cond2_841	chr1	187961527	187961742	+	4.89983	NA	intron (ENSMUST00000127489.7, intron 3 of 3)	protein_coding-intron (ENSMUST00000110939.7, intron 2 of 7)	-36193	ENSMUST00000027906.12	ENSMUSG00000026610	ENSMUST00000110939			Esrrg			protein_coding
e11ve16_cond2_842	chr1	188056163	188056362	+	6.40541	NA	intron (ENSMUST00000027906.12, intron 2 of 6)	protein_coding-intron (ENSMUST00000027906.12, intron 2 of 6)	-47272	ENSMUST00000195397.1	ENSMUSG00000103577	ENSMUST00000195397			9330162B11Rik			lncRNA
e11ve16_cond2_843	chr1	188118219	188118528	+	6.76807	NA	intron (ENSMUST00000110939.7, intron 4 of 7)	protein_coding-intron (ENSMUST00000027906.12, intron 3 of 6)	-42334	ENSMUST00000194286.1	ENSMUSG00000103732	ENSMUST00000194286			Gm38315			TEC
e11ve16_cond2_844	chr1	188330882	188331106	+	6.09708	NA	intron (ENSMUST00000142189.7, intron 3 of 4)	protein_coding-intron (ENSMUST00000060479.13, intron 3 of 70)	67960	ENSMUST00000060479.13	ENSMUSG00000026609	ENSMUST00000127077			Ush2a			protein_coding
e11ve16_cond2_845	chr1	188471974	188472416	+	8.2126	NA	intron (ENSMUST00000060479.13, intron 20 of 70)	protein_coding-intron (ENSMUST00000060479.13, intron 20 of 70)	-65612	ENSMUST00000142159.1	ENSMUSG00000026609	ENSMUST00000127077			Ush2a			protein_coding
e11ve16_cond2_846	chr1	188633285	188633946	+	7.51368	NA	exon (ENSMUST00000060479.13, exon 34 of 71)	protein_coding-exon (ENSMUST00000060479.13, exon 34 of 71)	-10562	ENSMUST00000104047.1	ENSMUSG00000077235	ENSMUST00000104047			Gm25095			snoRNA
e11ve16_cond2_847	chr1	188643155	188643448	+	4.29935	NA	intron (ENSMUST00000060479.13, intron 34 of 70)	protein_coding-intron (ENSMUST00000060479.13, intron 34 of 70)	-20248	ENSMUST00000104047.1	ENSMUSG00000077235	ENSMUST00000104047			Gm25095			snoRNA
e11ve16_cond2_848	chr1	188660692	188661064	+	3.54989	NA	intron (ENSMUST00000142159.1, intron 12 of 12)	protein_coding-intron (ENSMUST00000060479.13, intron 36 of 70)	-37825	ENSMUST00000104047.1	ENSMUSG00000077235	ENSMUST00000104047			Gm25095			snoRNA
e11ve16_cond2_849	chr1	188667340	188668030	+	4.5233	NA	intron (ENSMUST00000142159.1, intron 12 of 12)	protein_coding-intron (ENSMUST00000060479.13, intron 36 of 70)	-44632	ENSMUST00000104047.1	ENSMUSG00000077235	ENSMUST00000104047			Gm25095			snoRNA
e11ve16_cond2_850	chr1	188675559	188675796	+	9.45049	NA	intron (ENSMUST00000142159.1, intron 12 of 12)	protein_coding-intron (ENSMUST00000060479.13, intron 36 of 70)	-52624	ENSMUST00000104047.1	ENSMUSG00000077235	ENSMUST00000104047			Gm25095			snoRNA
e11ve16_cond2_851	chr1	189310031	189310765	+	13.6381	NA	intron (ENSMUST00000110920.6, intron 3 of 7)	protein_coding-intron (ENSMUST00000079451.12, intron 2 of 6)	-32575	ENSMUST00000191699.1	ENSMUSG00000102824	ENSMUST00000191699			Pdcd5-ps			processed_pseudogene
e11ve16_cond2_852	chr1	189353621	189354358	+	8.9247	NA	intron (ENSMUST00000194402.5, intron 1 of 6)	protein_coding-intron (ENSMUST00000180044.7, intron 1 of 5)	-7008	ENSMUST00000195016.1	ENSMUSG00000037624	ENSMUST00000195016			Kcnk2			protein_coding
e11ve16_cond2_853	chr1	189405107	189405755	+	11.904	NA	Intergenic	Intergenic	-3158	ENSMUST00000180044.7	ENSMUSG00000037624	ENSMUST00000195016			Kcnk2			protein_coding
e11ve16_cond2_854	chr1	189727355	189728178	+	15.4716	NA	promoter-TSS (ENSMUST00000097442.8)	protein_coding-promoter-TSS (ENSMUST00000097442.8)	-502	ENSMUST00000097442.8	ENSMUSG00000026604	ENSMUST00000148129			Ptpn14			protein_coding
e11ve16_cond2_855	chr1	189791785	189792003	+	4.02915	NA	intron (ENSMUST00000128275.1, intron 1 of 11)	protein_coding-intron (ENSMUST00000027898.6, intron 1 of 17)	5222	ENSMUST00000027898.6	ENSMUSG00000026604	ENSMUST00000148129			Ptpn14			protein_coding
e11ve16_cond2_856	chr1	189798793	189799015	+	3.56652	NA	intron (ENSMUST00000194127.5, intron 3 of 9)	protein_coding-intron (ENSMUST00000027898.6, intron 2 of 17)	12232	ENSMUST00000027898.6	ENSMUSG00000026604	ENSMUST00000148129			Ptpn14			protein_coding
e11ve16_cond2_857	chr1	189819430	189819636	+	3.25101	NA	intron (ENSMUST00000194127.5, intron 3 of 9)	protein_coding-intron (ENSMUST00000027898.6, intron 2 of 17)	-7697	ENSMUST00000192214.1	ENSMUSG00000102248	ENSMUST00000192214			Gm30280			processed_pseudogene
e11ve16_cond2_858	chr1	189860449	189860766	+	4.81358	NA	intron (ENSMUST00000097442.8, intron 16 of 18)	protein_coding-intron (ENSMUST00000027898.6, intron 15 of 17)	-2052	ENSMUST00000148129.1	ENSMUSG00000026604	ENSMUST00000148129			Ptpn14			protein_coding
e11ve16_cond2_859	chr1	189860900	189861266	+	4.82547	NA	intron (ENSMUST00000097442.8, intron 16 of 18)	protein_coding-intron (ENSMUST00000027898.6, intron 15 of 17)	-1576	ENSMUST00000148129.1	ENSMUSG00000026604	ENSMUST00000148129			Ptpn14			protein_coding
e11ve16_cond2_860	chr1	190088446	190088762	+	4.75241	NA	Intergenic	Intergenic	-80066	ENSMUST00000189880.1	ENSMUSG00000099404	ENSMUST00000189880			Gm28172			lncRNA
e11ve16_cond2_861	chr1	190528429	190528827	+	7.1857	NA	Intergenic	Intergenic	-45471	ENSMUST00000175323.2	ENSMUSG00000093064	ENSMUST00000175323			Gm23153			misc_RNA
e11ve16_cond2_862	chr1	190563144	190563469	+	4.28863	NA	Intergenic	Intergenic	-31020	ENSMUST00000191893.1	ENSMUSG00000103963	ENSMUST00000191893			Gm30932			lncRNA
e11ve16_cond2_863	chr1	190655492	190655856	+	4.89598	NA	Intergenic	Intergenic	61348	ENSMUST00000191893.1	ENSMUSG00000103963	ENSMUST00000191893			Gm30932			lncRNA
e11ve16_cond2_864	chr1	190797315	190797956	+	3.97852	NA	TTS (ENSMUST00000162500.7)	protein_coding-TTS (ENSMUST00000162500.7)	12828	ENSMUST00000160891.1	ENSMUSG00000089872	ENSMUST00000162692			Rps6kc1			protein_coding
e11ve16_cond2_865	chr1	190898917	190899845	+	5.13311	NA	intron (ENSMUST00000159624.7, intron 3 of 12)	protein_coding-intron (ENSMUST00000061611.14, intron 3 of 14)	336	ENSMUST00000162692.1	ENSMUSG00000089872	ENSMUST00000162692			Rps6kc1			protein_coding
e11ve16_cond2_866	chr1	190928526	190928903	+	4.08118	NA	promoter-TSS (ENSMUST00000130298.3)	protein_coding-promoter-TSS (ENSMUST00000130298.3)	-108	ENSMUST00000135364.6	ENSMUSG00000026634	ENSMUST00000134187			Angel2			protein_coding
e11ve16_cond2_867	chr1	191183330	191183917	+	4.24252	NA	promoter-TSS (ENSMUST00000027941.13)	protein_coding-promoter-TSS (ENSMUST00000027941.13)	-283	ENSMUST00000027941.13	ENSMUSG00000026628	ENSMUST00000027941			Atf3			protein_coding
e11ve16_cond2_868	chr1	191280553	191280774	+	6.10789	NA	intron (ENSMUST00000192965.1, intron 1 of 5)	lncRNA-intron (ENSMUST00000192965.1, intron 1 of 5)	13485	ENSMUST00000192965.1	ENSMUSG00000103174	ENSMUST00000192965			Gm37168			lncRNA
e11ve16_cond2_869	chr1	191397192	191397749	+	9.02522	NA	promoter-TSS (ENSMUST00000067976.8)	protein_coding-promoter-TSS (ENSMUST00000067976.8)	-429	ENSMUST00000067976.8	ENSMUSG00000026626	ENSMUST00000194832			Ppp2r5a			protein_coding
e11ve16_cond2_870	chr1	191434846	191435763	+	12.9891	NA	Intergenic	Intergenic	27638	ENSMUST00000194903.1	ENSMUSG00000103433	ENSMUST00000194903			Gm2272			processed_pseudogene
e11ve16_cond2_871	chr1	191470516	191470964	+	7.44389	NA	Intergenic	Intergenic	-5692	ENSMUST00000192778.1	ENSMUSG00000103114	ENSMUST00000192778			Gm32200			lncRNA
e11ve16_cond2_872	chr1	191498135	191498359	+	5.2364	NA	Intergenic	Intergenic	-4342	ENSMUST00000195294.1	ENSMUSG00000103517	ENSMUST00000195294			Gm37432			lncRNA
e11ve16_cond2_873	chr1	191517993	191518283	+	4.35398	NA	Intergenic	Intergenic	18754	ENSMUST00000192556.1	ENSMUSG00000102246	ENSMUST00000192556			9430037O13Rik			TEC
e11ve16_cond2_874	chr1	191693021	191693906	+	12.7661	NA	Intergenic	Intergenic	-24371	ENSMUST00000110855.7	ENSMUSG00000026623	ENSMUST00000110855			Lpgat1			protein_coding
e11ve16_cond2_875	chr1	192136706	192136964	+	4.62826	NA	promoter-TSS (ENSMUST00000180598.2)	lncRNA-promoter-TSS (ENSMUST00000180598.2)	-61	ENSMUST00000180598.2	ENSMUSG00000097316	ENSMUST00000195083			Gm10516			lncRNA
e11ve16_cond2_876	chr1	192400690	192401905	+	22.3596	NA	intron (ENSMUST00000078470.11, intron 7 of 10)	protein_coding-intron (ENSMUST00000078470.11, intron 7 of 10)	-33443	ENSMUST00000151152.2	ENSMUSG00000058248	ENSMUST00000151152			Kcnh1			protein_coding
e11ve16_cond2_877	chr1	192770612	192771116	+	3.79441	NA	intron (ENSMUST00000128619.7, intron 1 of 11)	protein_coding-intron (ENSMUST00000044190.11, intron 1 of 11)	128	ENSMUST00000192946.1	ENSMUSG00000037375	ENSMUST00000154755			Hhat			protein_coding
e11ve16_cond2_878	chr1	192785377	192786038	+	7.74132	NA	Intergenic	Intergenic	-14484	ENSMUST00000044190.11	ENSMUSG00000037375	ENSMUST00000154755			Hhat			protein_coding
e11ve16_cond2_879	chr1	192816138	192816462	+	5.18415	NA	Intergenic	Intergenic	4827	ENSMUST00000195130.1	ENSMUSG00000103874	ENSMUST00000195130			Gm38360			processed_pseudogene
e11ve16_cond2_880	chr1	192822734	192822948	+	3.42545	NA	Intergenic	Intergenic	-1714	ENSMUST00000195130.1	ENSMUSG00000103874	ENSMUST00000195130			Gm38360			processed_pseudogene
e11ve16_cond2_881	chr1	192830556	192830893	+	3.87563	NA	Intergenic	Intergenic	3995	ENSMUST00000057543.2	ENSMUSG00000047384	ENSMUST00000057543			A730013G03Rik			TEC
e11ve16_cond2_882	chr1	192881525	192882024	+	5.91289	NA	Intergenic	Intergenic	-6797	ENSMUST00000192374.1	ENSMUSG00000102162	ENSMUST00000192374			Gm2367			processed_pseudogene
e11ve16_cond2_883	chr1	192897095	192897605	+	6.26931	NA	exon (ENSMUST00000016344.8, exon 9 of 9)	protein_coding-exon (ENSMUST00000016344.8, exon 9 of 9)	8779	ENSMUST00000192374.1	ENSMUSG00000102162	ENSMUST00000192374			Gm2367			processed_pseudogene
e11ve16_cond2_884	chr1	193152935	193153835	+	10.2305	NA	intron (ENSMUST00000076521.6, intron 1 of 7)	protein_coding-intron (ENSMUST00000076521.6, intron 1 of 7)	231	ENSMUST00000138826.7	ENSMUSG00000026638	ENSMUST00000140066			Irf6			protein_coding
e11ve16_cond2_885	chr1	193173807	193174620	+	3.94119	NA	intron (ENSMUST00000193307.1, intron 1 of 1)	protein_coding-intron (ENSMUST00000110831.3, intron 1 of 1)	469	ENSMUST00000193307.1	ENSMUSG00000079144	ENSMUST00000110831			A130010J15Rik			protein_coding
e11ve16_cond2_886	chr1	193188357	193189239	+	4.11635	NA	intron (ENSMUST00000162454.2, intron 1 of 1)	protein_coding-intron (ENSMUST00000043550.10, intron 8 of 15)	1524	ENSMUST00000162454.2	ENSMUSG00000090080	ENSMUST00000162454			Gm15872			lncRNA
e11ve16_cond2_887	chr1	193293023	193293274	+	3.24242	NA	intron (ENSMUST00000194677.5, intron 4 of 26)	protein_coding-intron (ENSMUST00000192322.5, intron 2 of 8)	-2259	ENSMUST00000193570.1	ENSMUSG00000103736	ENSMUST00000193570			Gm37650			lncRNA
e11ve16_cond2_888	chr1	193301224	193302224	+	29.5431	NA	promoter-TSS (ENSMUST00000016315.15)	protein_coding-promoter-TSS (ENSMUST00000016315.15)	-269	ENSMUST00000016315.15	ENSMUSG00000026639	ENSMUST00000159955			Lamb3			protein_coding
e11ve16_cond2_889	chr1	193309636	193309838	+	4.08022	NA	intron (ENSMUST00000192322.5, intron 4 of 8)	protein_coding-intron (ENSMUST00000016315.15, intron 3 of 22)	7494	ENSMUST00000159955.1	ENSMUSG00000026639	ENSMUST00000159955			Lamb3			protein_coding
e11ve16_cond2_890	chr1	193310013	193310621	+	7.90992	NA	intron (ENSMUST00000192322.5, intron 4 of 8)	protein_coding-intron (ENSMUST00000016315.15, intron 3 of 22)	8074	ENSMUST00000159955.1	ENSMUSG00000026639	ENSMUST00000159955			Lamb3			protein_coding
e11ve16_cond2_891	chr1	193449061	193450064	+	9.54915	NA	Intergenic	Intergenic	-25728	ENSMUST00000191762.1	ENSMUSG00000102648	ENSMUST00000191762			Gm38022			processed_pseudogene
e11ve16_cond2_892	chr1	193558656	193558899	+	3.36459	NA	Intergenic	Intergenic	-48603	ENSMUST00000180420.2	ENSMUSG00000097850	ENSMUST00000180420			Mir205hg			lncRNA
e11ve16_cond2_893	chr1	193571839	193572388	+	9.43929	NA	Intergenic	Intergenic	-61939	ENSMUST00000180420.2	ENSMUSG00000097850	ENSMUST00000180420			Mir205hg			lncRNA
e11ve16_cond2_894	chr1	193928056	193928538	+	4.07259	NA	Intergenic	Intergenic	61288	ENSMUST00000194272.1	ENSMUSG00000104182	ENSMUST00000194272			Gm21362			processed_pseudogene
e11ve16_cond2_895	chr1	193945363	193945701	+	6.08925	NA	Intergenic	Intergenic	78523	ENSMUST00000194272.1	ENSMUSG00000104182	ENSMUST00000194272			Gm21362			processed_pseudogene
e11ve16_cond2_896	chr1	194245513	194246542	+	8.34867	NA	Intergenic	Intergenic	-23268	ENSMUST00000193395.1	ENSMUSG00000103692	ENSMUST00000193395			4930503O07Rik			lncRNA
e11ve16_cond2_897	chr1	194401999	194402341	+	4.03588	NA	Intergenic	Intergenic	-179411	ENSMUST00000193395.1	ENSMUSG00000103692	ENSMUST00000193395			4930503O07Rik			lncRNA
e11ve16_cond2_898	chr1	194619802	194621322	+	9.94824	NA	exon (ENSMUST00000194398.1, exon 1 of 1)	protein_coding-exon (ENSMUST00000194398.1, exon 1 of 1)	737	ENSMUST00000027952.11	ENSMUSG00000026640	ENSMUST00000135664			Plxna2			protein_coding
e11ve16_cond2_899	chr1	194641761	194642432	+	5.93515	NA	intron (ENSMUST00000027952.11, intron 1 of 31)	protein_coding-intron (ENSMUST00000027952.11, intron 1 of 31)	-2760	ENSMUST00000125381.1	ENSMUSG00000026640	ENSMUST00000135664			Plxna2			protein_coding
e11ve16_cond2_900	chr1	194651669	194652576	+	19.3698	NA	TTS (ENSMUST00000192025.1)	TEC-TTS (ENSMUST00000192025.1)	1803	ENSMUST00000192025.1	ENSMUSG00000102523	ENSMUST00000192025			Gm37783			TEC
e11ve16_cond2_901	chr1	194675629	194676415	+	8.74557	NA	promoter-TSS (ENSMUST00000194586.1)	TEC-promoter-TSS (ENSMUST00000194586.1)	-980	ENSMUST00000194586.1	ENSMUSG00000102841	ENSMUST00000194586			Gm38036			TEC
e11ve16_cond2_902	chr1	194879281	194880234	+	8.97506	NA	Intergenic	Intergenic	21100	ENSMUST00000122682.1	ENSMUSG00000084631	ENSMUST00000122682			Gm23885			misc_RNA
e11ve16_cond2_903	chr1	194976263	194976668	+	9.34638	NA	promoter-TSS (ENSMUST00000181226.7)	lncRNA-promoter-TSS (ENSMUST00000181226.7)	80	ENSMUST00000181947.7	ENSMUSG00000096929	ENSMUST00000194584			A330023F24Rik			lncRNA
e11ve16_cond2_904	chr1	195016684	195017523	+	10.9649	NA	promoter-TSS (ENSMUST00000181273.6)	lncRNA-promoter-TSS (ENSMUST00000181273.6)	-295	ENSMUST00000181273.6	ENSMUSG00000096929	ENSMUST00000194584			A330023F24Rik			lncRNA
e11ve16_cond2_905	chr1	195091754	195092616	+	7.2885	NA	promoter-TSS (ENSMUST00000159563.7)	protein_coding-promoter-TSS (ENSMUST00000159563.7)	40	ENSMUST00000159563.7	ENSMUSG00000016493	ENSMUST00000159563			Cd46			protein_coding
e11ve16_cond2_906	chr1	195131014	195131631	+	9.61152	NA	promoter-TSS (ENSMUST00000192405.1)	protein_coding-promoter-TSS (ENSMUST00000192405.1)	1	ENSMUST00000194111.5	ENSMUSG00000016481	ENSMUST00000193829			Cr1l			protein_coding
e11ve16_cond2_907	chr1	195241334	195242268	+	991.758	NA	promoter-TSS (ENSMUST00000184449.1)	misc_RNA-promoter-TSS (ENSMUST00000184449.1)	-794	ENSMUST00000184449.1	ENSMUSG00000099208	ENSMUST00000184449			Gm27940			misc_RNA
e11ve16_cond2_908	chr10	3109931	3116924	+	873.395	NA	Intergenic	Intergenic	5560	ENSMUST00000217604.1	ENSMUSG00000111106	ENSMUST00000217604			Gm3318			processed_pseudogene
e11ve16_cond2_909	chr10	3191842	3192537	+	11.4327	NA	Intergenic	Intergenic	16169	ENSMUST00000213719.1	ENSMUSG00000111625	ENSMUST00000213719			Gm48097			processed_pseudogene
e11ve16_cond2_910	chr10	3267506	3268069	+	6.40801	NA	promoter-TSS (ENSMUST00000170893.2)	protein_coding-promoter-TSS (ENSMUST00000170893.2)	-16	ENSMUST00000214645.1	ENSMUSG00000091618	ENSMUST00000214645			H60c			protein_coding
e11ve16_cond2_911	chr10	3270758	3271581	+	21.007	NA	Intergenic	Intergenic	-3398	ENSMUST00000214645.1	ENSMUSG00000091618	ENSMUST00000214645			H60c			protein_coding
e11ve16_cond2_912	chr10	3307580	3308375	+	7.96248	NA	Intergenic	Intergenic	4928	ENSMUST00000215318.1	ENSMUSG00000111114	ENSMUST00000215318			Gm18703			processed_pseudogene
e11ve16_cond2_913	chr10	3342581	3343425	+	11.0451	NA	Intergenic	Intergenic	-23054	ENSMUST00000043374.6	ENSMUSG00000040653	ENSMUST00000043374			Ppp1r14c			protein_coding
e11ve16_cond2_914	chr10	3366542	3367712	+	4.47798	NA	intron (ENSMUST00000217573.1, intron 1 of 1)	protein_coding-intron (ENSMUST00000043374.6, intron 1 of 3)	583	ENSMUST00000217573.1	ENSMUSG00000040653	ENSMUST00000043374			Ppp1r14c			protein_coding
e11ve16_cond2_915	chr10	3392222	3392501	+	5.01171	NA	intron (ENSMUST00000217573.1, intron 1 of 1)	protein_coding-intron (ENSMUST00000043374.6, intron 1 of 3)	25817	ENSMUST00000217573.1	ENSMUSG00000040653	ENSMUST00000043374			Ppp1r14c			protein_coding
e11ve16_cond2_916	chr10	3427638	3428222	+	8.11139	NA	intron (ENSMUST00000043374.6, intron 3 of 3)	protein_coding-intron (ENSMUST00000043374.6, intron 3 of 3)	2907	ENSMUST00000117005.1	ENSMUSG00000080655	ENSMUST00000117005			Gm24482			miRNA
e11ve16_cond2_917	chr10	3430811	3431076	+	5.02714	NA	intron (ENSMUST00000043374.6, intron 3 of 3)	protein_coding-intron (ENSMUST00000043374.6, intron 3 of 3)	5920	ENSMUST00000117005.1	ENSMUSG00000080655	ENSMUST00000117005			Gm24482			miRNA
e11ve16_cond2_918	chr10	3446917	3447491	+	4.39145	NA	intron (ENSMUST00000043374.6, intron 3 of 3)	protein_coding-intron (ENSMUST00000043374.6, intron 3 of 3)	22181	ENSMUST00000117005.1	ENSMUSG00000080655	ENSMUST00000117005			Gm24482			miRNA
e11ve16_cond2_919	chr10	3452622	3453657	+	6.68136	NA	intron (ENSMUST00000043374.6, intron 3 of 3)	protein_coding-intron (ENSMUST00000043374.6, intron 3 of 3)	28116	ENSMUST00000117005.1	ENSMUSG00000080655	ENSMUST00000117005			Gm24482			miRNA
e11ve16_cond2_920	chr10	3507649	3508406	+	18.2013	NA	Intergenic	Intergenic	-32213	ENSMUST00000019896.4	ENSMUSG00000019762	ENSMUST00000019896			Iyd			protein_coding
e11ve16_cond2_921	chr10	3702796	3703010	+	4.30679	NA	Intergenic	Intergenic	-37461	ENSMUST00000120274.7	ENSMUSG00000040624	ENSMUST00000239159			Plekhg1			protein_coding
e11ve16_cond2_922	chr10	3717860	3718598	+	7.27546	NA	Intergenic	Intergenic	-22135	ENSMUST00000120274.7	ENSMUSG00000040624	ENSMUST00000239159			Plekhg1			protein_coding
e11ve16_cond2_923	chr10	3870821	3871395	+	4.76285	NA	intron (ENSMUST00000238840.1, intron 1 of 3)	protein_coding-intron (ENSMUST00000120274.7, intron 2 of 16)	-1501	ENSMUST00000117631.1	ENSMUSG00000082123	ENSMUST00000117631			Gm16149			processed_pseudogene
e11ve16_cond2_924	chr10	4209219	4210002	+	5.98804	NA	intron (ENSMUST00000213553.1, intron 2 of 3)	lncRNA-intron (ENSMUST00000213553.1, intron 2 of 3)	3504	ENSMUST00000213553.1	ENSMUSG00000111266	ENSMUST00000213553			Gm30570			lncRNA
e11ve16_cond2_925	chr10	4315489	4315812	+	5.7834	NA	intron (ENSMUST00000045730.6, intron 2 of 3)	protein_coding-intron (ENSMUST00000045730.6, intron 2 of 3)	-18895	ENSMUST00000239373.1	ENSMUSG00000038587	ENSMUST00000215696			Akap12			protein_coding
e11ve16_cond2_926	chr10	4325403	4325838	+	8.46251	NA	intron (ENSMUST00000045730.6, intron 2 of 3)	protein_coding-intron (ENSMUST00000045730.6, intron 2 of 3)	-8925	ENSMUST00000239373.1	ENSMUSG00000038587	ENSMUST00000215696			Akap12			protein_coding
e11ve16_cond2_927	chr10	4386728	4386967	+	3.62233	NA	intron (ENSMUST00000100078.9, intron 1 of 2)	protein_coding-intron (ENSMUST00000100077.4, intron 1 of 2)	628	ENSMUST00000100077.4	ENSMUSG00000075327	ENSMUST00000215860			Zbtb2			protein_coding
e11ve16_cond2_928	chr10	5032561	5032943	+	4.25312	NA	intron (ENSMUST00000215295.1, intron 143 of 145)	protein_coding-intron (ENSMUST00000095899.4, intron 14 of 16)	3704	ENSMUST00000175448.1	ENSMUSG00000093189	ENSMUST00000175448			Gm25694			ribozyme
e11ve16_cond2_929	chr10	5116331	5116977	+	4.88982	NA	TTS (ENSMUST00000215467.1)	protein_coding-TTS (ENSMUST00000215467.1)	-25368	ENSMUST00000220298.1	ENSMUSG00000111890	ENSMUST00000220298			Gm48836			processed_pseudogene
e11ve16_cond2_930	chr10	5412076	5412362	+	8.4546	NA	intron (ENSMUST00000215295.1, intron 10 of 145)	protein_coding-intron (ENSMUST00000041639.6, intron 10 of 31)	-43733	ENSMUST00000215887.1	ENSMUSG00000096054	ENSMUST00000215467			Syne1			protein_coding
e11ve16_cond2_931	chr10	5499606	5500138	+	12.7094	NA	intron (ENSMUST00000041639.6, intron 2 of 31)	protein_coding-intron (ENSMUST00000041639.6, intron 2 of 31)	50806	ENSMUST00000215295.1	ENSMUSG00000096054	ENSMUST00000215467			Syne1			protein_coding
e11ve16_cond2_932	chr10	5593040	5593854	+	4.15684	NA	promoter-TSS (ENSMUST00000051809.9)	protein_coding-promoter-TSS (ENSMUST00000051809.9)	-328	ENSMUST00000051809.9	ENSMUSG00000046916	ENSMUST00000051809			Myct1			protein_coding
e11ve16_cond2_933	chr10	5685714	5686091	+	5.23773	NA	Intergenic	Intergenic	45550	ENSMUST00000217331.1	ENSMUSG00000019772	ENSMUST00000019906			Vip			protein_coding
e11ve16_cond2_934	chr10	5805530	5806154	+	9.47577	NA	promoter-TSS (ENSMUST00000019907.7)	protein_coding-promoter-TSS (ENSMUST00000019907.7)	-242	ENSMUST00000019907.7	ENSMUSG00000019773	ENSMUST00000142200			Fbxo5			protein_coding
e11ve16_cond2_935	chr10	5823794	5825088	+	12.8575	NA	promoter-TSS (ENSMUST00000019908.8)	protein_coding-promoter-TSS (ENSMUST00000019908.8)	-531	ENSMUST00000019908.8	ENSMUSG00000019774	ENSMUST00000145718			Mtrf1l			protein_coding
e11ve16_cond2_936	chr10	6011442	6011664	+	3.27934	NA	Intergenic	Intergenic	-89153	ENSMUST00000064225.13	ENSMUSG00000019775	ENSMUST00000019909			Rgs17			protein_coding
e11ve16_cond2_937	chr10	6290983	6292004	+	7.31677	NA	Intergenic	Intergenic	-76183	ENSMUST00000219296.1	ENSMUSG00000112179	ENSMUST00000219296			Gm3213			processed_pseudogene
e11ve16_cond2_938	chr10	6338707	6339603	+	10.6274	NA	Intergenic	Intergenic	-28521	ENSMUST00000219296.1	ENSMUSG00000112179	ENSMUST00000219296			Gm3213			processed_pseudogene
e11ve16_cond2_939	chr10	6492074	6492756	+	30.8511	NA	Intergenic	Intergenic	34459	ENSMUST00000219804.1	ENSMUSG00000111902	ENSMUST00000219804			Gm4921			processed_pseudogene
e11ve16_cond2_940	chr10	6848582	6849303	+	7.20091	NA	intron (ENSMUST00000052751.13, intron 3 of 4)	protein_coding-intron (ENSMUST00000052751.13, intron 3 of 4)	59843	ENSMUST00000148625.1	ENSMUSG00000000766	ENSMUST00000123861			Oprm1			protein_coding
e11ve16_cond2_941	chr10	6896047	6897190	+	7.69017	NA	intron (ENSMUST00000105617.7, intron 8 of 8)	protein_coding-intron (ENSMUST00000052751.13, intron 3 of 4)	83093	ENSMUST00000078070.9	ENSMUSG00000064065	ENSMUST00000105617			Ipcef1			protein_coding
e11ve16_cond2_942	chr10	7103671	7103913	+	3.7598	NA	Intergenic	Intergenic	31714	ENSMUST00000150282.1	ENSMUSG00000015202	ENSMUST00000150282			Cnksr3			protein_coding
e11ve16_cond2_943	chr10	7118278	7118934	+	9.8522	NA	TTS (ENSMUST00000015346.11)	protein_coding-TTS (ENSMUST00000015346.11)	16900	ENSMUST00000150282.1	ENSMUSG00000015202	ENSMUST00000150282			Cnksr3			protein_coding
e11ve16_cond2_944	chr10	7143893	7144135	+	7.52243	NA	intron (ENSMUST00000015346.11, intron 4 of 12)	protein_coding-intron (ENSMUST00000015346.11, intron 4 of 12)	-8508	ENSMUST00000150282.1	ENSMUSG00000015202	ENSMUST00000150282			Cnksr3			protein_coding
e11ve16_cond2_945	chr10	7211335	7211620	+	5.46637	NA	intron (ENSMUST00000015346.11, intron 1 of 12)	protein_coding-intron (ENSMUST00000015346.11, intron 1 of 12)	760	ENSMUST00000015346.11	ENSMUSG00000015202	ENSMUST00000150282			Cnksr3			protein_coding
e11ve16_cond2_946	chr10	7212232	7212680	+	4.73564	NA	promoter-TSS (ENSMUST00000015346.11)	protein_coding-promoter-TSS (ENSMUST00000015346.11)	-219	ENSMUST00000015346.11	ENSMUSG00000015202	ENSMUST00000150282			Cnksr3			protein_coding
e11ve16_cond2_947	chr10	7258584	7258923	+	3.83533	NA	Intergenic	Intergenic	-46516	ENSMUST00000015346.11	ENSMUSG00000015202	ENSMUST00000150282			Cnksr3			protein_coding
e11ve16_cond2_948	chr10	7289570	7290613	+	42.4483	NA	Intergenic	Intergenic	-77854	ENSMUST00000015346.11	ENSMUSG00000015202	ENSMUST00000150282			Cnksr3			protein_coding
e11ve16_cond2_949	chr10	7390576	7391223	+	4.23367	NA	promoter-TSS (ENSMUST00000220179.1)	processed_pseudogene-promoter-TSS (ENSMUST00000220179.1)	-116	ENSMUST00000220179.1	ENSMUSG00000112057	ENSMUST00000220179			Gm21321			processed_pseudogene
e11ve16_cond2_950	chr10	7589838	7590069	+	4.28794	NA	promoter-TSS (ENSMUST00000130590.7)	protein_coding-promoter-TSS (ENSMUST00000130590.7)	-26	ENSMUST00000130590.7	ENSMUSG00000019796	ENSMUST00000019931			Lrp11			protein_coding
e11ve16_cond2_951	chr10	7736987	7737450	+	6.54862	NA	intron (ENSMUST00000173400.7, intron 1 of 5)	protein_coding-intron (ENSMUST00000019929.12, intron 1 of 10)	11210	ENSMUST00000173400.7	ENSMUSG00000019794	ENSMUST00000165806			Katna1			protein_coding
e11ve16_cond2_952	chr10	7832340	7832663	+	5.77939	NA	promoter-TSS (ENSMUST00000039484.5)	protein_coding-promoter-TSS (ENSMUST00000039484.5)	31	ENSMUST00000039484.5	ENSMUSG00000039981	ENSMUST00000039484			Zc3h12d			protein_coding
e11ve16_cond2_953	chr10	7841636	7842054	+	7.74409	NA	intron (ENSMUST00000039484.5, intron 2 of 5)	protein_coding-intron (ENSMUST00000039484.5, intron 2 of 5)	5464	ENSMUST00000175319.1	ENSMUSG00000093060	ENSMUST00000175319			Mir5104			miRNA
e11ve16_cond2_954	chr10	7861439	7862220	+	7.04606	NA	intron (ENSMUST00000039484.5, intron 3 of 5)	protein_coding-intron (ENSMUST00000039484.5, intron 3 of 5)	-13348	ENSMUST00000158232.1	ENSMUSG00000088857	ENSMUST00000158232			Gm24726			snoRNA
e11ve16_cond2_955	chr10	7956231	7956611	+	5.12646	NA	promoter-TSS (ENSMUST00000146444.7)	protein_coding-promoter-TSS (ENSMUST00000146444.7)	-191	ENSMUST00000146444.7	ENSMUSG00000015755	ENSMUST00000130322			Tab2			protein_coding
e11ve16_cond2_956	chr10	7993713	7994082	+	4.88659	NA	Intergenic	Intergenic	27395	ENSMUST00000218165.1	ENSMUSG00000112360	ENSMUST00000218165			Gm48614			lncRNA
e11ve16_cond2_957	chr10	8028826	8029136	+	3.99644	NA	Intergenic	Intergenic	-7689	ENSMUST00000218165.1	ENSMUSG00000112360	ENSMUST00000218165			Gm48614			lncRNA
e11ve16_cond2_958	chr10	8091823	8092861	+	5.84384	NA	Intergenic	Intergenic	-71050	ENSMUST00000218165.1	ENSMUSG00000112360	ENSMUST00000218165			Gm48614			lncRNA
e11ve16_cond2_959	chr10	8173006	8173233	+	5.7227	NA	Intergenic	Intergenic	-3012	ENSMUST00000219578.1	ENSMUSG00000112109	ENSMUST00000219578			Gm30906			lncRNA
e11ve16_cond2_960	chr10	8174382	8174650	+	10.083	NA	Intergenic	Intergenic	-1615	ENSMUST00000219578.1	ENSMUSG00000112109	ENSMUST00000219578			Gm30906			lncRNA
e11ve16_cond2_961	chr10	8181852	8182292	+	8.85022	NA	intron (ENSMUST00000219578.1, intron 1 of 2)	lncRNA-intron (ENSMUST00000219578.1, intron 1 of 2)	5941	ENSMUST00000219578.1	ENSMUSG00000112109	ENSMUST00000219578			Gm30906			lncRNA
e11ve16_cond2_962	chr10	8472156	8472416	+	10.9507	NA	intron (ENSMUST00000061601.8, intron 1 of 7)	protein_coding-intron (ENSMUST00000061601.8, intron 1 of 7)	46539	ENSMUST00000061601.8	ENSMUSG00000047712	ENSMUST00000061601			Ust			protein_coding
e11ve16_cond2_963	chr10	8505534	8505945	+	7.33279	NA	intron (ENSMUST00000061601.8, intron 1 of 7)	protein_coding-intron (ENSMUST00000061601.8, intron 1 of 7)	13086	ENSMUST00000061601.8	ENSMUSG00000047712	ENSMUST00000061601			Ust			protein_coding
e11ve16_cond2_964	chr10	8754494	8754974	+	6.00611	NA	intron (ENSMUST00000015449.5, intron 9 of 19)	protein_coding-intron (ENSMUST00000015449.5, intron 9 of 19)	2027	ENSMUST00000212869.1	ENSMUSG00000015305	ENSMUST00000212553			Sash1			protein_coding
e11ve16_cond2_965	chr10	8885989	8886346	+	4.79823	NA	promoter-TSS (ENSMUST00000015449.5)	protein_coding-promoter-TSS (ENSMUST00000015449.5)	-97	ENSMUST00000015449.5	ENSMUSG00000015305	ENSMUST00000212553			Sash1			protein_coding
e11ve16_cond2_966	chr10	8902689	8903021	+	4.0752	NA	Intergenic	Intergenic	-1126	ENSMUST00000215873.1	ENSMUSG00000111731	ENSMUST00000215873			Gm48727			lncRNA
e11ve16_cond2_967	chr10	8928459	8929116	+	5.03678	NA	intron (ENSMUST00000215873.1, intron 2 of 3)	lncRNA-intron (ENSMUST00000215873.1, intron 2 of 3)	-23162	ENSMUST00000213841.1	ENSMUSG00000111674	ENSMUST00000213841			Gm48728			lncRNA
e11ve16_cond2_968	chr10	9328370	9328587	+	5.17518	NA	Intergenic	Intergenic	8140	ENSMUST00000220435.1	ENSMUSG00000112019	ENSMUST00000220435			Gm48748			lncRNA
e11ve16_cond2_969	chr10	9900968	9901473	+	3.98784	NA	promoter-TSS (ENSMUST00000038213.13)	protein_coding-promoter-TSS (ENSMUST00000038213.13)	-93	ENSMUST00000218800.1	ENSMUSG00000112146	ENSMUST00000218800			Gm46210			lncRNA
e11ve16_cond2_970	chr10	9901629	9901871	+	3.98436	NA	promoter-TSS (ENSMUST00000141722.7)	protein_coding-promoter-TSS (ENSMUST00000141722.7)	437	ENSMUST00000218800.1	ENSMUSG00000112146	ENSMUST00000218800			Gm46210			lncRNA
e11ve16_cond2_971	chr10	10557249	10558225	+	5.64014	NA	intron (ENSMUST00000220018.2, intron 1 of 3)	protein_coding-intron (ENSMUST00000019974.4, intron 1 of 2)	444	ENSMUST00000220018.2	ENSMUSG00000019832	ENSMUST00000019974			Rab32			protein_coding
e11ve16_cond2_972	chr10	11149259	11149908	+	9.86378	NA	promoter-TSS (ENSMUST00000054814.13)	protein_coding-promoter-TSS (ENSMUST00000054814.13)	59	ENSMUST00000054814.13	ENSMUSG00000090112	ENSMUST00000160461			Shprh			protein_coding
e11ve16_cond2_973	chr10	11280801	11281335	+	7.47267	NA	promoter-TSS (ENSMUST00000070300.4)	protein_coding-promoter-TSS (ENSMUST00000070300.4)	-70	ENSMUST00000181330.2	ENSMUSG00000097007	ENSMUST00000181330			4930432B10Rik			lncRNA
e11ve16_cond2_974	chr10	11310466	11310737	+	5.17985	NA	Intergenic	Intergenic	19814	ENSMUST00000219929.1	ENSMUSG00000111983	ENSMUST00000219929			Gm48666			processed_pseudogene
e11ve16_cond2_975	chr10	11343342	11343697	+	9.29778	NA	promoter-TSS (ENSMUST00000161438.1)	protein_coding-promoter-TSS (ENSMUST00000161438.1)	66	ENSMUST00000161438.1	ENSMUSG00000055493	ENSMUST00000069106			Epm2a			protein_coding
e11ve16_cond2_976	chr10	12658029	12658790	+	14.9974	NA	intron (ENSMUST00000076817.4, intron 42 of 73)	protein_coding-intron (ENSMUST00000076817.4, intron 42 of 73)	30453	ENSMUST00000219724.1	ENSMUSG00000019820	ENSMUST00000219724			Utrn			protein_coding
e11ve16_cond2_977	chr10	12673138	12674036	+	10.5041	NA	intron (ENSMUST00000219724.1, intron 7 of 11)	protein_coding-intron (ENSMUST00000076817.4, intron 33 of 73)	15275	ENSMUST00000219724.1	ENSMUSG00000019820	ENSMUST00000219724			Utrn			protein_coding
e11ve16_cond2_978	chr10	12716817	12717039	+	3.30668	NA	intron (ENSMUST00000218635.1, intron 19 of 74)	protein_coding-intron (ENSMUST00000076817.4, intron 18 of 73)	-28066	ENSMUST00000219724.1	ENSMUSG00000019820	ENSMUST00000219724			Utrn			protein_coding
e11ve16_cond2_979	chr10	12837576	12838367	+	23.068	NA	intron (ENSMUST00000219660.1, intron 2 of 17)	protein_coding-intron (ENSMUST00000076817.4, intron 1 of 73)	-8117	ENSMUST00000219425.1	ENSMUSG00000112698	ENSMUST00000219425			Gm7525			processed_pseudogene
e11ve16_cond2_980	chr10	12869277	12869534	+	4.58475	NA	promoter-TSS (ENSMUST00000218635.1)	protein_coding-promoter-TSS (ENSMUST00000218635.1)	-40	ENSMUST00000218635.1	ENSMUSG00000019820	ENSMUST00000219724			Utrn			protein_coding
e11ve16_cond2_981	chr10	12887862	12888626	+	11.3104	NA	Intergenic	Intergenic	-18879	ENSMUST00000218635.1	ENSMUSG00000019820	ENSMUST00000219724			Utrn			protein_coding
e11ve16_cond2_982	chr10	13099922	13100388	+	3.55672	NA	intron (ENSMUST00000138433.7, intron 2 of 4)	protein_coding-intron (ENSMUST00000121766.7, intron 2 of 7)	-8338	ENSMUST00000185060.1	ENSMUSG00000098635	ENSMUST00000185060			Gm27741			misc_RNA
e11ve16_cond2_983	chr10	13168433	13168732	+	3.7892	NA	intron (ENSMUST00000019954.5, intron 3 of 5)	protein_coding-intron (ENSMUST00000019954.5, intron 3 of 5)	9441	ENSMUST00000019954.5	ENSMUSG00000019815	ENSMUST00000219970			Zc2hc1b			protein_coding
e11ve16_cond2_984	chr10	13192569	13193220	+	5.15779	NA	promoter-TSS (ENSMUST00000219824.1)	protein_coding-promoter-TSS (ENSMUST00000219824.1)	274	ENSMUST00000019950.5	ENSMUSG00000019814	ENSMUST00000219824			Ltv1			protein_coding
e11ve16_cond2_985	chr10	13327950	13329043	+	12.4287	NA	intron (ENSMUST00000105545.11, intron 1 of 12)	protein_coding-intron (ENSMUST00000079698.6, intron 1 of 12)	-4207	ENSMUST00000105543.8	ENSMUSG00000062866	ENSMUST00000105543			Phactr2			protein_coding
e11ve16_cond2_986	chr10	13446483	13447322	+	16.3426	NA	intron (ENSMUST00000105545.11, intron 1 of 12)	protein_coding-intron (ENSMUST00000105545.11, intron 1 of 12)	27510	ENSMUST00000105545.11	ENSMUSG00000062866	ENSMUST00000105543			Phactr2			protein_coding
e11ve16_cond2_987	chr10	13501046	13501360	+	3.53499	NA	TTS (ENSMUST00000130865.1)	protein_coding-TTS (ENSMUST00000130865.1)	119	ENSMUST00000150048.1	ENSMUSG00000019810	ENSMUST00000121465			Fuca2			protein_coding
e11ve16_cond2_988	chr10	13856164	13857074	+	8.04777	NA	intron (ENSMUST00000162869.1, intron 1 of 2)	protein_coding-intron (ENSMUST00000019942.5, intron 1 of 5)	4707	ENSMUST00000162798.1	ENSMUSG00000019806	ENSMUST00000162610			Aig1			protein_coding
e11ve16_cond2_989	chr10	13869215	13869683	+	4.55786	NA	promoter-TSS (ENSMUST00000019942.5)	protein_coding-promoter-TSS (ENSMUST00000019942.5)	-469	ENSMUST00000162610.7	ENSMUSG00000019806	ENSMUST00000162610			Aig1			protein_coding
e11ve16_cond2_990	chr10	13932793	13933078	+	6.36302	NA	Intergenic	Intergenic	-3971	ENSMUST00000220438.1	ENSMUSG00000112494	ENSMUST00000220438			4930444K16Rik			TEC
e11ve16_cond2_991	chr10	14401894	14402097	+	13.9662	NA	TTS (ENSMUST00000041168.5)	protein_coding-TTS (ENSMUST00000041168.5)	74584	ENSMUST00000218527.1	ENSMUSG00000112225	ENSMUST00000218527			Gm48854			lncRNA
e11ve16_cond2_992	chr10	14463967	14464270	+	5.82051	NA	intron (ENSMUST00000041168.5, intron 4 of 24)	protein_coding-intron (ENSMUST00000041168.5, intron 4 of 24)	-58960	ENSMUST00000096020.6	ENSMUSG00000071532	ENSMUST00000096020			Gm10335			processed_pseudogene
e11ve16_cond2_993	chr10	14491931	14492217	+	7.2384	NA	intron (ENSMUST00000208905.1, intron 2 of 2)	protein_coding-intron (ENSMUST00000041168.5, intron 2 of 24)	-31004	ENSMUST00000096020.6	ENSMUSG00000071532	ENSMUST00000096020			Gm10335			processed_pseudogene
e11ve16_cond2_994	chr10	14544902	14545114	+	3.51983	NA	promoter-TSS (ENSMUST00000041168.5)	protein_coding-promoter-TSS (ENSMUST00000041168.5)	-13	ENSMUST00000207953.1	ENSMUSG00000039116	ENSMUST00000208905			Adgrg6			protein_coding
e11ve16_cond2_995	chr10	14582859	14583163	+	6.12987	NA	Intergenic	Intergenic	-3925	ENSMUST00000217881.1	ENSMUSG00000112490	ENSMUST00000217881			Gm48068			processed_pseudogene
e11ve16_cond2_996	chr10	14639028	14640369	+	18.1121	NA	Intergenic	Intergenic	-24522	ENSMUST00000124976.1	ENSMUSG00000085572	ENSMUST00000124976			Gm16234			lncRNA
e11ve16_cond2_997	chr10	14770384	14770750	+	7.64189	NA	TTS (ENSMUST00000186382.6)	protein_coding-TTS (ENSMUST00000186382.6)	-1373	ENSMUST00000220206.1	ENSMUSG00000112113	ENSMUST00000220206			Gm47698			lncRNA
e11ve16_cond2_998	chr10	15702628	15703030	+	9.17332	NA	intron (ENSMUST00000217765.1, intron 1 of 1)	lncRNA-intron (ENSMUST00000217765.1, intron 1 of 1)	31905	ENSMUST00000219927.1	ENSMUSG00000112335	ENSMUST00000219927			Gm46188			processed_pseudogene
e11ve16_cond2_999	chr10	16367207	16367787	+	16.3094	NA	TTS (ENSMUST00000218710.1)	processed_pseudogene-TTS (ENSMUST00000218710.1)	2699	ENSMUST00000218710.1	ENSMUSG00000112602	ENSMUST00000218710			Gm18557			processed_pseudogene
e11ve16_cond2_1000	chr10	16962365	16962826	+	4.93464	NA	intron (ENSMUST00000208005.1, intron 9 of 12)	lncRNA-intron (ENSMUST00000185722.1, intron 5 of 8)	585	ENSMUST00000208191.1	ENSMUSG00000101969	ENSMUST00000185722			Gm20125			lncRNA
e11ve16_cond2_1001	chr10	16994090	16994899	+	11.1373	NA	intron (ENSMUST00000208870.1, intron 1 of 3)	lncRNA-intron (ENSMUST00000185722.1, intron 1 of 8)	1825	ENSMUST00000208415.1	ENSMUSG00000101969	ENSMUST00000185722			Gm20125			lncRNA
e11ve16_cond2_1002	chr10	16996829	16997467	+	8.46589	NA	promoter-TSS (ENSMUST00000208415.1)	lncRNA-promoter-TSS (ENSMUST00000208415.1)	-829	ENSMUST00000208415.1	ENSMUSG00000101969	ENSMUST00000185722			Gm20125			lncRNA
e11ve16_cond2_1003	chr10	17003461	17003705	+	5.0261	NA	intron (ENSMUST00000208870.1, intron 1 of 3)	lncRNA-intron (ENSMUST00000185722.1, intron 1 of 8)	-7264	ENSMUST00000208415.1	ENSMUSG00000101969	ENSMUST00000185722			Gm20125			lncRNA
e11ve16_cond2_1004	chr10	17213732	17214231	+	7.36756	NA	Intergenic	Intergenic	97177	ENSMUST00000157811.1	ENSMUSG00000088436	ENSMUST00000157811			Gm25382			snRNA
e11ve16_cond2_1005	chr10	17411359	17411998	+	14.4986	NA	Intergenic	Intergenic	-78801	ENSMUST00000220296.1	ENSMUSG00000111922	ENSMUST00000220296			Gm47760			lncRNA
e11ve16_cond2_1006	chr10	17418022	17418629	+	5.60808	NA	Intergenic	Intergenic	-85448	ENSMUST00000220296.1	ENSMUSG00000111922	ENSMUST00000220296			Gm47760			lncRNA
e11ve16_cond2_1007	chr10	17433772	17434223	+	6.70095	NA	Intergenic	Intergenic	-80733	ENSMUST00000219028.1	ENSMUSG00000112296	ENSMUST00000219028			Gm47768			processed_pseudogene
e11ve16_cond2_1008	chr10	17528508	17528882	+	3.72808	NA	Intergenic	Intergenic	-1781	ENSMUST00000220318.1	ENSMUSG00000111927	ENSMUST00000220318			Gm47770			lncRNA
e11ve16_cond2_1009	chr10	17530743	17531308	+	13.7965	NA	Intergenic	Intergenic	-4111	ENSMUST00000220318.1	ENSMUSG00000111927	ENSMUST00000220318			Gm47770			lncRNA
e11ve16_cond2_1010	chr10	17540563	17540782	+	4.75658	NA	Intergenic	Intergenic	-13758	ENSMUST00000220318.1	ENSMUSG00000111927	ENSMUST00000220318			Gm47770			lncRNA
e11ve16_cond2_1011	chr10	17567127	17567388	+	8.02835	NA	intron (ENSMUST00000219966.1, intron 1 of 2)	lncRNA-intron (ENSMUST00000219966.1, intron 1 of 2)	-40343	ENSMUST00000220318.1	ENSMUSG00000111927	ENSMUST00000220318			Gm47770			lncRNA
e11ve16_cond2_1012	chr10	17569164	17570004	+	9.91392	NA	intron (ENSMUST00000219966.1, intron 1 of 2)	lncRNA-intron (ENSMUST00000219966.1, intron 1 of 2)	-42670	ENSMUST00000220318.1	ENSMUSG00000111927	ENSMUST00000220318			Gm47770			lncRNA
e11ve16_cond2_1013	chr10	17576386	17576709	+	3.77899	NA	intron (ENSMUST00000219966.1, intron 1 of 2)	lncRNA-intron (ENSMUST00000219966.1, intron 1 of 2)	-49633	ENSMUST00000220318.1	ENSMUSG00000111927	ENSMUST00000220318			Gm47770			lncRNA
e11ve16_cond2_1014	chr10	17722031	17723189	+	6.13033	NA	promoter-TSS (ENSMUST00000038107.8)	protein_coding-promoter-TSS (ENSMUST00000038107.8)	-608	ENSMUST00000038107.8	ENSMUSG00000039910	ENSMUST00000219558			Cited2			protein_coding
e11ve16_cond2_1015	chr10	17930855	17931747	+	7.15325	NA	intron (ENSMUST00000037879.7, intron 1 of 3)	protein_coding-intron (ENSMUST00000037879.7, intron 1 of 3)	-16079	ENSMUST00000217949.1	ENSMUSG00000039879	ENSMUST00000217949			Heca			protein_coding
e11ve16_cond2_1016	chr10	18191768	18192040	+	7.48515	NA	intron (ENSMUST00000208948.1, intron 2 of 20)	protein_coding-intron (ENSMUST00000095817.4, intron 3 of 20)	9449	ENSMUST00000207827.1	ENSMUSG00000071392	ENSMUST00000095817			Ect2l			protein_coding
e11ve16_cond2_1017	chr10	18527158	18527779	+	5.83235	NA	intron (ENSMUST00000207038.1, intron 5 of 6)	protein_coding-intron (ENSMUST00000037341.13, intron 5 of 6)	18419	ENSMUST00000213153.1	ENSMUSG00000019853	ENSMUST00000213153			Hebp2			protein_coding
e11ve16_cond2_1018	chr10	18642338	18642611	+	4.97541	NA	intron (ENSMUST00000019999.6, intron 12 of 32)	protein_coding-intron (ENSMUST00000019999.6, intron 12 of 32)	-76519	ENSMUST00000215943.1	ENSMUSG00000111173	ENSMUST00000215943			Gm48297			processed_pseudogene
e11ve16_cond2_1019	chr10	18741050	18741601	+	19.5719	NA	intron (ENSMUST00000019999.6, intron 1 of 32)	protein_coding-intron (ENSMUST00000019999.6, intron 1 of 32)	-2144	ENSMUST00000215162.1	ENSMUSG00000111474	ENSMUST00000214043			Gm32926			lncRNA
e11ve16_cond2_1020	chr10	18844827	18845840	+	5.36369	NA	exon (ENSMUST00000019998.8, exon 1 of 3)	protein_coding-exon (ENSMUST00000019998.8, exon 1 of 3)	313	ENSMUST00000019998.8	ENSMUSG00000019851	ENSMUST00000019998			Perp			protein_coding
e11ve16_cond2_1021	chr10	18886929	18887365	+	5.28131	NA	promoter-TSS (ENSMUST00000214387.1)	lncRNA-promoter-TSS (ENSMUST00000214387.1)	-118	ENSMUST00000214387.1	ENSMUSG00000111318	ENSMUST00000214387			Gm48483			lncRNA
e11ve16_cond2_1022	chr10	19099489	19099694	+	3.89119	NA	exon (ENSMUST00000217363.1, exon 2 of 4)	lncRNA-exon (ENSMUST00000217363.1, exon 2 of 4)	-1954	ENSMUST00000216947.1	ENSMUSG00000110770	ENSMUST00000216947			Tpi-rs5			processed_pseudogene
e11ve16_cond2_1023	chr10	19127509	19128121	+	5.22779	NA	Intergenic	Intergenic	4608	ENSMUST00000217107.1	ENSMUSG00000111320	ENSMUST00000217107			Gm48546			processed_pseudogene
e11ve16_cond2_1024	chr10	19491670	19492184	+	5.30755	NA	intron (ENSMUST00000214178.1, intron 2 of 3)	lncRNA-intron (ENSMUST00000214178.1, intron 2 of 3)	-2716	ENSMUST00000216664.1	ENSMUSG00000110902	ENSMUST00000216664			Gm33104			lncRNA
e11ve16_cond2_1025	chr10	19591493	19592269	+	4.91573	NA	promoter-TSS (ENSMUST00000020188.12)	protein_coding-promoter-TSS (ENSMUST00000020188.12)	-68	ENSMUST00000020188.12	ENSMUSG00000020009	ENSMUST00000168074			Ifngr1			protein_coding
e11ve16_cond2_1026	chr10	19624528	19625111	+	5.43119	NA	intron (ENSMUST00000036564.7, intron 2 of 4)	protein_coding-intron (ENSMUST00000036564.7, intron 2 of 4)	2821	ENSMUST00000036564.7	ENSMUSG00000039760	ENSMUST00000036564			Il22ra2			protein_coding
e11ve16_cond2_1027	chr10	19907414	19907683	+	5.61416	NA	promoter-TSS (ENSMUST00000166511.8)	protein_coding-promoter-TSS (ENSMUST00000166511.8)	99	ENSMUST00000166511.8	ENSMUSG00000020003	ENSMUST00000125942			Pex7			protein_coding
e11ve16_cond2_1028	chr10	19933865	19934116	+	4.2152	NA	promoter-TSS (ENSMUST00000095806.9)	protein_coding-promoter-TSS (ENSMUST00000095806.9)	-482	ENSMUST00000095806.9	ENSMUSG00000071369	ENSMUST00000152533			Map3k5			protein_coding
e11ve16_cond2_1029	chr10	19966581	19966826	+	6.37272	NA	intron (ENSMUST00000152533.1, intron 1 of 3)	protein_coding-intron (ENSMUST00000095806.9, intron 1 of 29)	15648	ENSMUST00000152533.1	ENSMUSG00000071369	ENSMUST00000152533			Map3k5			protein_coding
e11ve16_cond2_1030	chr10	20045794	20046703	+	10.1593	NA	intron (ENSMUST00000095806.9, intron 7 of 29)	protein_coding-intron (ENSMUST00000095806.9, intron 7 of 29)	-53277	ENSMUST00000138994.1	ENSMUSG00000071369	ENSMUST00000152533			Map3k5			protein_coding
e11ve16_cond2_1031	chr10	20178598	20178943	+	3.87656	NA	intron (ENSMUST00000213386.1, intron 1 of 5)	protein_coding-intron (ENSMUST00000215924.1, intron 1 of 3)	6763	ENSMUST00000213386.1	ENSMUSG00000019996	ENSMUST00000215924			Map7			protein_coding
e11ve16_cond2_1032	chr10	20214357	20214924	+	9.85154	NA	intron (ENSMUST00000213386.1, intron 1 of 5)	protein_coding-intron (ENSMUST00000217251.1, intron 1 of 2)	6150	ENSMUST00000216127.1	ENSMUSG00000111356	ENSMUST00000216127			Rpl32l			processed_pseudogene
e11ve16_cond2_1033	chr10	20311792	20313161	+	121.736	NA	promoter-TSS (ENSMUST00000043881.11)	protein_coding-promoter-TSS (ENSMUST00000043881.11)	4	ENSMUST00000186100.6	ENSMUSG00000037608	ENSMUST00000191143			Bclaf1			protein_coding
e11ve16_cond2_1034	chr10	20409098	20409633	+	10.0133	NA	intron (ENSMUST00000020165.13, intron 11 of 12)	protein_coding-intron (ENSMUST00000020165.13, intron 11 of 12)	37526	ENSMUST00000217240.1	ENSMUSG00000019990	ENSMUST00000166147			Pde7b			protein_coding
e11ve16_cond2_1035	chr10	20503259	20504272	+	14.2299	NA	intron (ENSMUST00000020165.13, intron 2 of 12)	protein_coding-intron (ENSMUST00000020165.13, intron 2 of 12)	14399	ENSMUST00000097355.3	ENSMUSG00000092051	ENSMUST00000166792			Gm17229			transcribed_processed_pseudogene
e11ve16_cond2_1036	chr10	21090951	21091506	+	16.2829	NA	Intergenic	Intergenic	-9332	ENSMUST00000215135.1	ENSMUSG00000111102	ENSMUST00000215135			Gm48189			lncRNA
e11ve16_cond2_1037	chr10	21857801	21858011	+	4.81068	NA	Intergenic	Intergenic	-13055	ENSMUST00000180731.1	ENSMUSG00000097107	ENSMUST00000180731			Platr6			lncRNA
e11ve16_cond2_1038	chr10	22058604	22059176	+	4.63799	NA	Intergenic	Intergenic	6639	ENSMUST00000217665.1	ENSMUSG00000111953	ENSMUST00000217665			Gm18637			processed_pseudogene
e11ve16_cond2_1039	chr10	22142397	22143087	+	189.289	NA	intron (ENSMUST00000181677.1, intron 1 of 1)	protein_coding-intron (ENSMUST00000179054.7, intron 1 of 1)	5868	ENSMUST00000181677.1	ENSMUSG00000097327	ENSMUST00000181677			E030030I06Rik			protein_coding
e11ve16_cond2_1040	chr10	22148578	22148810	+	5.89095	NA	promoter-TSS (ENSMUST00000180697.1)	protein_coding-promoter-TSS (ENSMUST00000180697.1)	3	ENSMUST00000180697.1	ENSMUSG00000097327	ENSMUST00000181677			E030030I06Rik			protein_coding
e11ve16_cond2_1041	chr10	22202960	22203274	+	65.525	NA	intron (ENSMUST00000180456.1, intron 3 of 3)	protein_coding-intron (ENSMUST00000105522.8, intron 1 of 5)	-9536	ENSMUST00000181953.1	ENSMUSG00000097108	ENSMUST00000181953			Gm26581			lncRNA
e11ve16_cond2_1042	chr10	22212124	22213169	+	192.933	NA	promoter-TSS (ENSMUST00000181953.1)	lncRNA-promoter-TSS (ENSMUST00000181953.1)	-7	ENSMUST00000181953.1	ENSMUSG00000097108	ENSMUST00000181953			Gm26581			lncRNA
e11ve16_cond2_1043	chr10	22223326	22224207	+	83.0896	NA	promoter-TSS (ENSMUST00000181606.1)	unprocessed_pseudogene-promoter-TSS (ENSMUST00000181606.1)	-514	ENSMUST00000181606.1	ENSMUSG00000097053	ENSMUST00000181606			Gm1972			unprocessed_pseudogene
e11ve16_cond2_1044	chr10	22273298	22273836	+	5.8553	NA	intron (ENSMUST00000131558.1, intron 1 of 5)	protein_coding-intron (ENSMUST00000105522.8, intron 1 of 5)	221	ENSMUST00000131558.1	ENSMUSG00000075297	ENSMUST00000105522			H60b			protein_coding
e11ve16_cond2_1045	chr10	22393016	22393748	+	21.1352	NA	Intergenic	Intergenic	-9501	ENSMUST00000180537.1	ENSMUSG00000096937	ENSMUST00000180537			Gm10825			lncRNA
e11ve16_cond2_1046	chr10	22402353	22403413	+	136.885	NA	promoter-TSS (ENSMUST00000180537.1)	lncRNA-promoter-TSS (ENSMUST00000180537.1)	0	ENSMUST00000180537.1	ENSMUSG00000096937	ENSMUST00000180537			Gm10825			lncRNA
e11ve16_cond2_1047	chr10	22413565	22414296	+	56.6364	NA	promoter-TSS (ENSMUST00000180658.1)	unprocessed_pseudogene-promoter-TSS (ENSMUST00000180658.1)	-584	ENSMUST00000180658.1	ENSMUSG00000097012	ENSMUST00000180658			Gm16531			unprocessed_pseudogene
e11ve16_cond2_1048	chr10	22629063	22629389	+	8.16873	NA	Intergenic	Intergenic	-15785	ENSMUST00000042261.4	ENSMUSG00000037490	ENSMUST00000159174			Slc2a12			protein_coding
e11ve16_cond2_1049	chr10	22644964	22645479	+	6.32765	NA	exon (ENSMUST00000042261.4, exon 1 of 5)	protein_coding-exon (ENSMUST00000042261.4, exon 1 of 5)	210	ENSMUST00000042261.4	ENSMUSG00000037490	ENSMUST00000159174			Slc2a12			protein_coding
e11ve16_cond2_1050	chr10	22708172	22709215	+	13.1547	NA	intron (ENSMUST00000095794.3, intron 4 of 6)	protein_coding-intron (ENSMUST00000095794.3, intron 4 of 6)	-2308	ENSMUST00000141569.1	ENSMUSG00000071359	ENSMUST00000141569			Tbpl1			protein_coding
e11ve16_cond2_1051	chr10	22731092	22731894	+	5.71572	NA	promoter-TSS (ENSMUST00000127698.7)	protein_coding-promoter-TSS (ENSMUST00000127698.7)	-46	ENSMUST00000127698.7	ENSMUSG00000071359	ENSMUST00000141569			Tbpl1			protein_coding
e11ve16_cond2_1052	chr10	22877308	22878068	+	7.11893	NA	Intergenic	Intergenic	-57514	ENSMUST00000049930.8	ENSMUSG00000045680	ENSMUST00000218002			Tcf21			protein_coding
e11ve16_cond2_1053	chr10	23394359	23394704	+	4.86475	NA	Intergenic	Intergenic	-43745	ENSMUST00000220299.1	ENSMUSG00000010461	ENSMUST00000074366			Eya4			protein_coding
e11ve16_cond2_1054	chr10	23787286	23787744	+	4.441	NA	promoter-TSS (ENSMUST00000073926.7)	protein_coding-promoter-TSS (ENSMUST00000073926.7)	-240	ENSMUST00000218107.1	ENSMUSG00000061983	ENSMUST00000219783			Rps12			protein_coding
e11ve16_cond2_1055	chr10	23796633	23797256	+	4.23189	NA	promoter-TSS (ENSMUST00000119597.7)	protein_coding-promoter-TSS (ENSMUST00000119597.7)	-42	ENSMUST00000119597.7	ENSMUSG00000037455	ENSMUST00000134170			Slc18b1			protein_coding
e11ve16_cond2_1056	chr10	23851472	23852858	+	6.59462	NA	intron (ENSMUST00000020190.7, intron 2 of 6)	protein_coding-intron (ENSMUST00000020190.7, intron 2 of 6)	703	ENSMUST00000020190.7	ENSMUSG00000020010	ENSMUST00000020190			Vnn3			protein_coding
e11ve16_cond2_1057	chr10	23948113	23948375	+	4.37133	NA	Intergenic	Intergenic	-1314	ENSMUST00000045152.5	ENSMUSG00000069708	ENSMUST00000045152			Taar3			protein_coding
e11ve16_cond2_1058	chr10	24131592	24132609	+	4.2595	NA	intron (ENSMUST00000125161.2, intron 1 of 2)	lncRNA-intron (ENSMUST00000125161.2, intron 1 of 2)	380	ENSMUST00000125161.2	ENSMUSG00000085451	ENSMUST00000125161			Gm40614			lncRNA
e11ve16_cond2_1059	chr10	24134302	24134532	+	3.54217	NA	Intergenic	Intergenic	-1937	ENSMUST00000125161.2	ENSMUSG00000085451	ENSMUST00000125161			Gm40614			lncRNA
e11ve16_cond2_1060	chr10	24138822	24139162	+	6.9039	NA	Intergenic	Intergenic	-6512	ENSMUST00000125161.2	ENSMUSG00000085451	ENSMUST00000125161			Gm40614			lncRNA
e11ve16_cond2_1061	chr10	24149183	24149606	+	8.09473	NA	promoter-TSS (ENSMUST00000020174.6)	protein_coding-promoter-TSS (ENSMUST00000020174.6)	41	ENSMUST00000218643.1	ENSMUSG00000019998	ENSMUST00000218050			Stx7			protein_coding
e11ve16_cond2_1062	chr10	24445921	24446454	+	4.21739	NA	Intergenic	Intergenic	-1303	ENSMUST00000134627.1	ENSMUSG00000086148	ENSMUST00000134627			Gm15271			lncRNA
e11ve16_cond2_1063	chr10	24478968	24479411	+	3.90174	NA	Intergenic	Intergenic	31699	ENSMUST00000134627.1	ENSMUSG00000086148	ENSMUST00000134627			Gm15271			lncRNA
e11ve16_cond2_1064	chr10	24493507	24494152	+	5.80493	NA	Intergenic	Intergenic	20682	ENSMUST00000120865.1	ENSMUSG00000083196	ENSMUST00000120865			Gm15272			processed_pseudogene
e11ve16_cond2_1065	chr10	24520001	24521331	+	19.5806	NA	Intergenic	Intergenic	-6155	ENSMUST00000120865.1	ENSMUSG00000083196	ENSMUST00000120865			Gm15272			processed_pseudogene
e11ve16_cond2_1066	chr10	24534144	24534457	+	8.44423	NA	Intergenic	Intergenic	16040	ENSMUST00000146208.1	ENSMUSG00000087400	ENSMUST00000136908			Gm15270			lncRNA
e11ve16_cond2_1067	chr10	24534602	24535594	+	5.40356	NA	Intergenic	Intergenic	15242	ENSMUST00000146208.1	ENSMUSG00000087400	ENSMUST00000136908			Gm15270			lncRNA
e11ve16_cond2_1068	chr10	24628615	24629122	+	7.70093	NA	Intergenic	Intergenic	-31760	ENSMUST00000125158.1	ENSMUSG00000087400	ENSMUST00000136908			Gm15270			lncRNA
e11ve16_cond2_1069	chr10	24648198	24648454	+	6.48873	NA	intron (ENSMUST00000150570.7, intron 21 of 21)	protein_coding-intron (ENSMUST00000039882.12, intron 21 of 24)	25932	ENSMUST00000142974.1	ENSMUSG00000037370	ENSMUST00000105520			Enpp1			protein_coding
e11ve16_cond2_1070	chr10	24753739	24754349	+	6.07972	NA	Intergenic	Intergenic	30961	ENSMUST00000219861.1	ENSMUSG00000019989	ENSMUST00000219968			Enpp3			protein_coding
e11ve16_cond2_1071	chr10	24754866	24755084	+	3.71045	NA	Intergenic	Intergenic	30030	ENSMUST00000219861.1	ENSMUSG00000019989	ENSMUST00000219968			Enpp3			protein_coding
e11ve16_cond2_1072	chr10	24869923	24870206	+	3.39181	NA	promoter-TSS (ENSMUST00000020159.14)	protein_coding-promoter-TSS (ENSMUST00000020159.14)	17	ENSMUST00000020159.14	ENSMUSG00000019984	ENSMUST00000176285			Med23			protein_coding
e11ve16_cond2_1073	chr10	25127992	25128576	+	4.86575	NA	Intergenic	Intergenic	71874	ENSMUST00000100012.2	ENSMUSG00000039166	ENSMUST00000041984			Akap7			protein_coding
e11ve16_cond2_1074	chr10	25184809	25185358	+	7.43958	NA	intron (ENSMUST00000175979.1, intron 2 of 2)	protein_coding-intron (ENSMUST00000041984.13, intron 7 of 7)	15075	ENSMUST00000100012.2	ENSMUSG00000039166	ENSMUST00000041984			Akap7			protein_coding
e11ve16_cond2_1075	chr10	25213876	25214134	+	3.99704	NA	intron (ENSMUST00000175979.1, intron 2 of 2)	protein_coding-intron (ENSMUST00000041984.13, intron 7 of 7)	6686	ENSMUST00000220347.1	ENSMUSG00000039166	ENSMUST00000041984			Akap7			protein_coding
e11ve16_cond2_1076	chr10	25296880	25297236	+	5.26472	NA	promoter-TSS (ENSMUST00000176258.7)	protein_coding-promoter-TSS (ENSMUST00000176258.7)	15	ENSMUST00000177124.1	ENSMUSG00000039166	ENSMUST00000041984			Akap7			protein_coding
e11ve16_cond2_1077	chr10	25359856	25360055	+	3.52589	NA	promoter-TSS (ENSMUST00000218903.1)	protein_coding-promoter-TSS (ENSMUST00000218903.1)	99	ENSMUST00000218903.1	ENSMUSG00000019978	ENSMUST00000217943			Epb41l2			protein_coding
e11ve16_cond2_1078	chr10	25881529	25881762	+	9.67604	NA	Intergenic	Intergenic	-2028	ENSMUST00000219770.1	ENSMUSG00000112861	ENSMUST00000219770			Gm47930			processed_pseudogene
e11ve16_cond2_1079	chr10	25890168	25890849	+	5.02778	NA	Intergenic	Intergenic	6835	ENSMUST00000219770.1	ENSMUSG00000112861	ENSMUST00000219770			Gm47930			processed_pseudogene
e11ve16_cond2_1080	chr10	26752749	26753249	+	6.37388	NA	promoter-TSS (ENSMUST00000176060.7)	protein_coding-promoter-TSS (ENSMUST00000176060.7)	-422	ENSMUST00000176060.7	ENSMUSG00000039031	ENSMUST00000176060			Arhgap18			protein_coding
e11ve16_cond2_1081	chr10	26772364	26773683	+	12.798	NA	exon (ENSMUST00000220012.1, exon 1 of 1)	protein_coding-exon (ENSMUST00000220012.1, exon 1 of 1)	476	ENSMUST00000220012.1	ENSMUSG00000039031	ENSMUST00000176060			Arhgap18			protein_coding
e11ve16_cond2_1082	chr10	26828770	26828991	+	4.68309	NA	intron (ENSMUST00000135866.1, intron 1 of 2)	protein_coding-intron (ENSMUST00000039557.8, intron 1 of 14)	6278	ENSMUST00000135866.1	ENSMUSG00000039031	ENSMUST00000176060			Arhgap18			protein_coding
e11ve16_cond2_1083	chr10	26855724	26856444	+	7.53076	NA	intron (ENSMUST00000039557.8, intron 4 of 14)	protein_coding-intron (ENSMUST00000039557.8, intron 4 of 14)	-7258	ENSMUST00000142284.1	ENSMUSG00000039031	ENSMUST00000176060			Arhgap18			protein_coding
e11ve16_cond2_1084	chr10	27241973	27242382	+	4.56448	NA	intron (ENSMUST00000092639.11, intron 15 of 64)	protein_coding-intron (ENSMUST00000092639.11, intron 15 of 64)	-29923	ENSMUST00000239098.1	ENSMUSG00000019899	ENSMUST00000186965			Lama2			protein_coding
e11ve16_cond2_1085	chr10	27661007	27661229	+	3.93985	NA	intron (ENSMUST00000218769.1, intron 2 of 4)	lncRNA-intron (ENSMUST00000218769.1, intron 2 of 4)	37209	ENSMUST00000218769.1	ENSMUSG00000112610	ENSMUST00000218769			Gm30165			lncRNA
e11ve16_cond2_1086	chr10	27688028	27688712	+	6.06625	NA	intron (ENSMUST00000218769.1, intron 1 of 4)	lncRNA-intron (ENSMUST00000218769.1, intron 1 of 4)	9957	ENSMUST00000218769.1	ENSMUSG00000112610	ENSMUST00000218769			Gm30165			lncRNA
e11ve16_cond2_1087	chr10	28074497	28075136	+	6.08246	NA	promoter-TSS (ENSMUST00000166468.1)	protein_coding-promoter-TSS (ENSMUST00000166468.1)	-4	ENSMUST00000166468.1	ENSMUSG00000019889	ENSMUST00000220404			Ptprk			protein_coding
e11ve16_cond2_1088	chr10	28087521	28087864	+	5.26279	NA	intron (ENSMUST00000218584.1, intron 1 of 13)	protein_coding-intron (ENSMUST00000166468.1, intron 1 of 31)	12682	ENSMUST00000219761.1	ENSMUSG00000019889	ENSMUST00000220404			Ptprk			protein_coding
e11ve16_cond2_1089	chr10	28164049	28164730	+	11.2091	NA	intron (ENSMUST00000218584.1, intron 1 of 13)	protein_coding-intron (ENSMUST00000166468.1, intron 1 of 31)	49732	ENSMUST00000102422.1	ENSMUSG00000076377	ENSMUST00000102422			Gm22370			miRNA
e11ve16_cond2_1090	chr10	28185501	28186203	+	5.05365	NA	intron (ENSMUST00000218584.1, intron 1 of 13)	protein_coding-intron (ENSMUST00000166468.1, intron 1 of 31)	28269	ENSMUST00000102422.1	ENSMUSG00000076377	ENSMUST00000102422			Gm22370			miRNA
e11ve16_cond2_1091	chr10	28227218	28228504	+	8.76571	NA	intron (ENSMUST00000218276.1, intron 2 of 33)	protein_coding-intron (ENSMUST00000166468.1, intron 2 of 31)	-13740	ENSMUST00000102422.1	ENSMUSG00000076377	ENSMUST00000102422			Gm22370			miRNA
e11ve16_cond2_1092	chr10	28450104	28450376	+	4.37002	NA	intron (ENSMUST00000219478.1, intron 7 of 14)	protein_coding-intron (ENSMUST00000166468.1, intron 7 of 31)	-109911	ENSMUST00000219621.1	ENSMUSG00000019889	ENSMUST00000220404			Ptprk			protein_coding
e11ve16_cond2_1093	chr10	28455357	28455628	+	5.30631	NA	intron (ENSMUST00000219478.1, intron 7 of 14)	protein_coding-intron (ENSMUST00000166468.1, intron 7 of 31)	-104659	ENSMUST00000219621.1	ENSMUSG00000019889	ENSMUST00000220404			Ptprk			protein_coding
e11ve16_cond2_1094	chr10	28492793	28493610	+	12.7036	NA	intron (ENSMUST00000218276.1, intron 12 of 33)	protein_coding-intron (ENSMUST00000166468.1, intron 12 of 31)	-66950	ENSMUST00000219621.1	ENSMUSG00000019889	ENSMUST00000220404			Ptprk			protein_coding
e11ve16_cond2_1095	chr10	29312774	29313599	+	10.8974	NA	promoter-TSS (ENSMUST00000020034.5)	protein_coding-promoter-TSS (ENSMUST00000020034.5)	20	ENSMUST00000160399.7	ENSMUSG00000019883	ENSMUST00000160399			Echdc1			protein_coding
e11ve16_cond2_1096	chr10	29333791	29334033	+	3.88716	NA	intron (ENSMUST00000161426.1, intron 4 of 5)	protein_coding-intron (ENSMUST00000020034.5, intron 4 of 5)	-15673	ENSMUST00000178368.1	ENSMUSG00000096841	ENSMUST00000178368			Gm25596			snRNA
e11ve16_cond2_1097	chr10	29361562	29362370	+	11.5623	NA	promoter-TSS (ENSMUST00000160372.8)	protein_coding-promoter-TSS (ENSMUST00000160372.8)	60	ENSMUST00000161508.2	ENSMUSG00000038876	ENSMUST00000160144			Rnf146			protein_coding
e11ve16_cond2_1098	chr10	30200075	30200550	+	6.26867	NA	intron (ENSMUST00000099985.5, intron 1 of 2)	protein_coding-intron (ENSMUST00000099985.5, intron 1 of 2)	180	ENSMUST00000216853.1	ENSMUSG00000075266	ENSMUST00000099985			Cenpw			protein_coding
e11ve16_cond2_1099	chr10	30617842	30618614	+	11.0066	NA	exon (ENSMUST00000019925.6, exon 1 of 5)	protein_coding-exon (ENSMUST00000019925.6, exon 1 of 5)	105	ENSMUST00000160646.2	ENSMUSG00000019791	ENSMUST00000160646			Hint3			protein_coding
e11ve16_cond2_1100	chr10	30655600	30656090	+	4.55815	NA	promoter-TSS (ENSMUST00000092610.11)	protein_coding-promoter-TSS (ENSMUST00000092610.11)	-8	ENSMUST00000217644.1	ENSMUSG00000039697	ENSMUST00000092610			Ncoa7			protein_coding
e11ve16_cond2_1101	chr10	30802789	30803376	+	8.6459	NA	promoter-TSS (ENSMUST00000068567.4)	protein_coding-promoter-TSS (ENSMUST00000068567.4)	25	ENSMUST00000068567.4	ENSMUSG00000039697	ENSMUST00000092610			Ncoa7			protein_coding
e11ve16_cond2_1102	chr10	31242106	31242686	+	5.8377	NA	Intergenic	Intergenic	-5627	ENSMUST00000216161.1	ENSMUSG00000039684	ENSMUST00000216161			Gm5422			transcribed_processed_pseudogene
e11ve16_cond2_1103	chr10	31312430	31313893	+	7.93024	NA	promoter-TSS (ENSMUST00000000304.13)	protein_coding-promoter-TSS (ENSMUST00000000304.13)	-222	ENSMUST00000000304.13	ENSMUSG00000000295	ENSMUST00000159194			Hddc2			protein_coding
e11ve16_cond2_1104	chr10	31385059	31385297	+	4.06249	NA	intron (ENSMUST00000213639.1, intron 1 of 5)	protein_coding-intron (ENSMUST00000000305.6, intron 1 of 6)	-13745	ENSMUST00000213319.1	ENSMUSG00000111256	ENSMUST00000213319			Gm48094			lncRNA
e11ve16_cond2_1105	chr10	31415187	31415655	+	4.27359	NA	intron (ENSMUST00000213639.1, intron 1 of 5)	protein_coding-intron (ENSMUST00000213639.1, intron 1 of 5)	-1256	ENSMUST00000214434.1	ENSMUSG00000110960	ENSMUST00000214434			Supt4b			processed_pseudogene
e11ve16_cond2_1106	chr10	31445673	31445901	+	3.59748	NA	promoter-TSS (ENSMUST00000213528.1)	protein_coding-promoter-TSS (ENSMUST00000213528.1)	10	ENSMUST00000213639.1	ENSMUSG00000000296	ENSMUST00000000305			Tpd52l1			protein_coding
e11ve16_cond2_1107	chr10	31537363	31537796	+	6.05811	NA	intron (ENSMUST00000081989.7, intron 1 of 5)	protein_coding-intron (ENSMUST00000081989.7, intron 1 of 5)	19861	ENSMUST00000219494.1	ENSMUSG00000112338	ENSMUST00000219494			Gm47693			TEC
e11ve16_cond2_1108	chr10	31609358	31609701	+	3.97478	NA	promoter-TSS (ENSMUST00000081989.7)	protein_coding-promoter-TSS (ENSMUST00000081989.7)	-345	ENSMUST00000081989.7	ENSMUSG00000063760	ENSMUST00000081989			Rnf217			protein_coding
e11ve16_cond2_1109	chr10	32984970	32985406	+	4.69383	NA	Intergenic	Intergenic	-45503	ENSMUST00000218959.1	ENSMUSG00000112469	ENSMUST00000218959			Gm47823			lncRNA
e11ve16_cond2_1110	chr10	33179729	33180283	+	6.4782	NA	intron (ENSMUST00000095762.4, intron 5 of 37)	protein_coding-intron (ENSMUST00000095762.4, intron 5 of 37)	8296	ENSMUST00000218354.1	ENSMUSG00000112897	ENSMUST00000218354			Gm47831			TEC
e11ve16_cond2_1111	chr10	34019311	34019980	+	12.1398	NA	promoter-TSS (ENSMUST00000019917.5)	protein_coding-promoter-TSS (ENSMUST00000019917.5)	-21	ENSMUST00000019917.5	ENSMUSG00000019782	ENSMUST00000019917			Rwdd1			protein_coding
e11ve16_cond2_1112	chr10	34096255	34097023	+	4.55463	NA	promoter-TSS (ENSMUST00000069125.7)	protein_coding-promoter-TSS (ENSMUST00000069125.7)	-120	ENSMUST00000069125.7	ENSMUSG00000049872	ENSMUST00000069125			Calhm5			protein_coding
e11ve16_cond2_1113	chr10	34212193	34212392	+	6.93934	NA	Intergenic	Intergenic	1786	ENSMUST00000216782.1	ENSMUSG00000111876	ENSMUST00000216782			Gm18346			processed_pseudogene
e11ve16_cond2_1114	chr10	34310123	34310556	+	5.38793	NA	exon (ENSMUST00000047885.13, exon 11 of 12)	protein_coding-exon (ENSMUST00000047885.13, exon 11 of 12)	3344	ENSMUST00000129363.7	ENSMUSG00000039480	ENSMUST00000129363			Nt5dc1			protein_coding
e11ve16_cond2_1115	chr10	34418251	34418942	+	5.24758	NA	promoter-TSS (ENSMUST00000047885.13)	protein_coding-promoter-TSS (ENSMUST00000047885.13)	-44	ENSMUST00000047885.13	ENSMUSG00000039480	ENSMUST00000129363			Nt5dc1			protein_coding
e11ve16_cond2_1116	chr10	34432656	34432945	+	3.94312	NA	Intergenic	Intergenic	-14248	ENSMUST00000047885.13	ENSMUSG00000039480	ENSMUST00000129363			Nt5dc1			protein_coding
e11ve16_cond2_1117	chr10	34461217	34461699	+	7.1575	NA	Intergenic	Intergenic	-21941	ENSMUST00000019913.14	ENSMUSG00000019779	ENSMUST00000170771			Frk			protein_coding
e11ve16_cond2_1118	chr10	34483477	34484263	+	5.44664	NA	TTS (ENSMUST00000215144.1)	protein_coding-TTS (ENSMUST00000215144.1)	338	ENSMUST00000215594.1	ENSMUSG00000019779	ENSMUST00000170771			Frk			protein_coding
e11ve16_cond2_1119	chr10	34512749	34512986	+	3.49296	NA	intron (ENSMUST00000215594.1, intron 1 of 5)	protein_coding-intron (ENSMUST00000019913.14, intron 2 of 8)	29335	ENSMUST00000215594.1	ENSMUSG00000019779	ENSMUST00000170771			Frk			protein_coding
e11ve16_cond2_1120	chr10	36611608	36611976	+	4.33732	NA	TTS (ENSMUST00000214665.1)	TEC-TTS (ENSMUST00000214665.1)	2282	ENSMUST00000214665.1	ENSMUSG00000111231	ENSMUST00000214665			Gm47054			TEC
e11ve16_cond2_1121	chr10	36974240	36974779	+	5.42199	NA	promoter-TSS (ENSMUST00000019911.13)	protein_coding-promoter-TSS (ENSMUST00000019911.13)	-35	ENSMUST00000019911.13	ENSMUSG00000019777	ENSMUST00000128031			Hdac2			protein_coding
e11ve16_cond2_1122	chr10	37078166	37079071	+	16.4781	NA	Intergenic	Intergenic	-51126	ENSMUST00000192030.1	ENSMUSG00000103299	ENSMUST00000192030			Gm38231			TEC
e11ve16_cond2_1123	chr10	37136282	37137298	+	6.90222	NA	exon (ENSMUST00000092584.5, exon 2 of 2)	protein_coding-exon (ENSMUST00000092584.5, exon 2 of 2)	2130	ENSMUST00000092584.5	ENSMUSG00000069662	ENSMUST00000092584			Marcks			protein_coding
e11ve16_cond2_1124	chr10	37617880	37618360	+	5.62715	NA	Intergenic	Intergenic	-165440	ENSMUST00000215235.1	ENSMUSG00000111549	ENSMUST00000215235			Gm48172			processed_pseudogene
e11ve16_cond2_1125	chr10	38295506	38296198	+	9.29513	NA	intron (ENSMUST00000213800.1, intron 2 of 2)	lncRNA-intron (ENSMUST00000213800.1, intron 2 of 2)	17994	ENSMUST00000213800.1	ENSMUSG00000111208	ENSMUST00000213800			Gm48197			lncRNA
e11ve16_cond2_1126	chr10	39502326	39502612	+	7.67912	NA	intron (ENSMUST00000146287.7, intron 2 of 12)	protein_coding-intron (ENSMUST00000063091.12, intron 3 of 13)	-9270	ENSMUST00000136659.1	ENSMUSG00000019843	ENSMUST00000146287			Fyn			protein_coding
e11ve16_cond2_1127	chr10	39597376	39597806	+	3.79088	NA	intron (ENSMUST00000143877.1, intron 2 of 2)	lncRNA-intron (ENSMUST00000124241.7, intron 2 of 2)	-9139	ENSMUST00000122987.1	ENSMUSG00000086915	ENSMUST00000122987			Gm16364			lncRNA
e11ve16_cond2_1128	chr10	39613163	39613983	+	5.90729	NA	promoter-TSS (ENSMUST00000124241.7)	lncRNA-promoter-TSS (ENSMUST00000124241.7)	94	ENSMUST00000142723.7	ENSMUSG00000086915	ENSMUST00000122987			Gm16364			lncRNA
e11ve16_cond2_1129	chr10	39659595	39660035	+	3.72421	NA	intron (ENSMUST00000149830.7, intron 2 of 3)	lncRNA-intron (ENSMUST00000129191.7, intron 1 of 3)	-1389	ENSMUST00000214556.1	ENSMUSG00000111358	ENSMUST00000214556			2900078I11Rik			TEC
e11ve16_cond2_1130	chr10	39908927	39909210	+	5.02973	NA	Intergenic	Intergenic	-2081	ENSMUST00000213986.1	ENSMUSG00000111355	ENSMUST00000213986			Gm8911			processed_pseudogene
e11ve16_cond2_1131	chr10	40090752	40091679	+	8.45238	NA	intron (ENSMUST00000213488.1, intron 1 of 2)	protein_coding-intron (ENSMUST00000092566.7, intron 1 of 5)	-14610	ENSMUST00000213827.1	ENSMUSG00000019838	ENSMUST00000092566			Slc16a10			protein_coding
e11ve16_cond2_1132	chr10	40116354	40116763	+	5.74263	NA	intron (ENSMUST00000213488.1, intron 1 of 2)	protein_coding-intron (ENSMUST00000092566.7, intron 1 of 5)	7096	ENSMUST00000104012.1	ENSMUSG00000077200	ENSMUST00000104012			Gm25613			snoRNA
e11ve16_cond2_1133	chr10	40146304	40146795	+	5.97739	NA	Intergenic	Intergenic	-4291	ENSMUST00000217252.1	ENSMUSG00000019838	ENSMUST00000092566			Slc16a10			protein_coding
e11ve16_cond2_1134	chr10	40177452	40178002	+	7.49562	NA	Intergenic	Intergenic	5965	ENSMUST00000214034.1	ENSMUSG00000111045	ENSMUST00000214034			Gm47598			lncRNA
e11ve16_cond2_1135	chr10	40257702	40259113	+	71.2354	NA	promoter-TSS (ENSMUST00000019982.8)	protein_coding-promoter-TSS (ENSMUST00000019982.8)	-60	ENSMUST00000196710.1	ENSMUSG00000106147	ENSMUST00000196710			Rnu3a			snoRNA
e11ve16_cond2_1136	chr10	40278274	40278523	+	7.55039	NA	Intergenic	Intergenic	3655	ENSMUST00000213723.1	ENSMUSG00000111213	ENSMUST00000213723			Gm47867			processed_pseudogene
e11ve16_cond2_1137	chr10	40467263	40468138	+	8.76951	NA	intron (ENSMUST00000044672.10, intron 6 of 12)	protein_coding-intron (ENSMUST00000044672.10, intron 6 of 12)	-81192	ENSMUST00000214826.1	ENSMUSG00000111251	ENSMUST00000214826			Gm18671			processed_pseudogene
e11ve16_cond2_1138	chr10	40476515	40477260	+	15.572	NA	intron (ENSMUST00000216736.1, intron 9 of 11)	protein_coding-intron (ENSMUST00000044672.10, intron 10 of 12)	-72005	ENSMUST00000214826.1	ENSMUSG00000111251	ENSMUST00000214826			Gm18671			processed_pseudogene
e11ve16_cond2_1139	chr10	40511059	40511972	+	6.17486	NA	Intergenic	Intergenic	-37377	ENSMUST00000214826.1	ENSMUSG00000111251	ENSMUST00000214826			Gm18671			processed_pseudogene
e11ve16_cond2_1140	chr10	41595198	41595580	+	4.3302	NA	intron (ENSMUST00000219054.1, intron 3 of 20)	protein_coding-intron (ENSMUST00000019955.15, intron 1 of 12)	-7636	ENSMUST00000160751.2	ENSMUSG00000075225	ENSMUST00000189488			Ccdc162			protein_coding
e11ve16_cond2_1141	chr10	42050985	42051867	+	10.6532	NA	Intergenic	Intergenic	3880	ENSMUST00000121229.1	ENSMUSG00000085666	ENSMUST00000121229			Gm9855			processed_pseudogene
e11ve16_cond2_1142	chr10	42085218	42085827	+	8.08933	NA	Intergenic	Intergenic	-30216	ENSMUST00000121229.1	ENSMUSG00000085666	ENSMUST00000121229			Gm9855			processed_pseudogene
e11ve16_cond2_1143	chr10	42148223	42148826	+	14.0322	NA	Intergenic	Intergenic	-93218	ENSMUST00000121229.1	ENSMUSG00000085666	ENSMUST00000121229			Gm9855			processed_pseudogene
e11ve16_cond2_1144	chr10	42293672	42294627	+	7.34917	NA	Intergenic	Intergenic	-15626	ENSMUST00000157540.1	ENSMUSG00000088165	ENSMUST00000157540			Gm23533			misc_RNA
e11ve16_cond2_1145	chr10	42834118	42834408	+	5.64006	NA	Intergenic	Intergenic	-13496	ENSMUST00000157094.1	ENSMUSG00000087719	ENSMUST00000157094			Gm26464			ribozyme
e11ve16_cond2_1146	chr10	43372175	43372494	+	11.7431	NA	intron (ENSMUST00000159139.7, intron 4 of 7)	protein_coding-intron (ENSMUST00000095725.10, intron 4 of 7)	1586	ENSMUST00000160308.1	ENSMUSG00000089839	ENSMUST00000160308			Rps19-ps11			processed_pseudogene
e11ve16_cond2_1147	chr10	43518050	43518562	+	5.00336	NA	promoter-TSS (ENSMUST00000216546.1)	lncRNA-promoter-TSS (ENSMUST00000216546.1)	-265	ENSMUST00000216546.1	ENSMUSG00000111368	ENSMUST00000216546			Gm47889			lncRNA
e11ve16_cond2_1148	chr10	43889474	43890033	+	10.0756	NA	intron (ENSMUST00000154405.1, intron 4 of 7)	protein_coding-intron (ENSMUST00000020012.6, intron 4 of 10)	5788	ENSMUST00000217541.1	ENSMUSG00000019863	ENSMUST00000217541			Qrsl1			protein_coding
e11ve16_cond2_1149	chr10	44038127	44038360	+	4.12667	NA	intron (ENSMUST00000200401.1, intron 2 of 21)	protein_coding-intron (ENSMUST00000200401.1, intron 2 of 21)	20535	ENSMUST00000239010.1	ENSMUSG00000019866	ENSMUST00000239010			Crybg1			protein_coding
e11ve16_cond2_1150	chr10	44268366	44268683	+	5.32097	NA	exon (ENSMUST00000039286.4, exon 1 of 8)	protein_coding-exon (ENSMUST00000039286.4, exon 1 of 8)	109	ENSMUST00000217412.1	ENSMUSG00000038160	ENSMUST00000217412			Atg5			protein_coding
e11ve16_cond2_1151	chr10	44427659	44428143	+	9.48112	NA	Intergenic	Intergenic	-3577	ENSMUST00000215400.1	ENSMUSG00000111078	ENSMUST00000215400			Gm35028			lncRNA
e11ve16_cond2_1152	chr10	44447420	44448100	+	5.27152	NA	intron (ENSMUST00000105490.2, intron 3 of 6)	protein_coding-intron (ENSMUST00000039174.10, intron 4 of 7)	9450	ENSMUST00000218369.1	ENSMUSG00000038151	ENSMUST00000039174			Prdm1			protein_coding
e11ve16_cond2_1153	chr10	44456761	44457231	+	4.26214	NA	exon (ENSMUST00000039174.10, exon 2 of 8)	protein_coding-exon (ENSMUST00000039174.10, exon 2 of 8)	214	ENSMUST00000218369.1	ENSMUSG00000038151	ENSMUST00000039174			Prdm1			protein_coding
e11ve16_cond2_1154	chr10	44484236	44484723	+	3.63404	NA	intron (ENSMUST00000167340.1, intron 1 of 3)	protein_coding-intron (ENSMUST00000167340.1, intron 1 of 3)	-25731	ENSMUST00000039174.10	ENSMUSG00000038151	ENSMUST00000039174			Prdm1			protein_coding
e11ve16_cond2_1155	chr10	44508801	44509160	+	5.08897	NA	intron (ENSMUST00000167340.1, intron 1 of 3)	protein_coding-intron (ENSMUST00000167340.1, intron 1 of 3)	19521	ENSMUST00000167340.1	ENSMUSG00000038151	ENSMUST00000039174			Prdm1			protein_coding
e11ve16_cond2_1156	chr10	44607874	44608083	+	5.12789	NA	intron (ENSMUST00000217008.1, intron 2 of 3)	lncRNA-intron (ENSMUST00000214824.1, intron 1 of 3)	-5804	ENSMUST00000216739.1	ENSMUSG00000111116	ENSMUST00000216739			Gm48065			lncRNA
e11ve16_cond2_1157	chr10	44981823	44982329	+	8.18345	NA	Intergenic	Intergenic	-24034	ENSMUST00000095717.1	ENSMUSG00000095168	ENSMUST00000095717			Gm4795			processed_pseudogene
e11ve16_cond2_1158	chr10	45060599	45061466	+	12.446	NA	Intergenic	Intergenic	-6171	ENSMUST00000099858.3	ENSMUSG00000019849	ENSMUST00000099858			Prep			protein_coding
e11ve16_cond2_1159	chr10	45091389	45092427	+	6.22178	NA	intron (ENSMUST00000099858.3, intron 3 of 14)	protein_coding-intron (ENSMUST00000099858.3, intron 3 of 14)	3800	ENSMUST00000103894.1	ENSMUSG00000077082	ENSMUST00000103894			Gm23766			miRNA
e11ve16_cond2_1160	chr10	45180527	45181980	+	31.4342	NA	intron (ENSMUST00000175658.1, intron 1 of 2)	protein_coding-intron (ENSMUST00000175658.1, intron 1 of 2)	3155	ENSMUST00000175658.1	ENSMUSG00000019848	ENSMUST00000019994			Popdc3			protein_coding
e11ve16_cond2_1161	chr10	45577777	45578142	+	7.05842	NA	promoter-TSS (ENSMUST00000131568.1)	protein_coding-promoter-TSS (ENSMUST00000131568.1)	130	ENSMUST00000037044.12	ENSMUSG00000038822	ENSMUST00000150511			Hace1			protein_coding
e11ve16_cond2_1162	chr10	45866885	45867150	+	8.616	NA	Intergenic	Intergenic	-8274	ENSMUST00000214811.1	ENSMUSG00000110841	ENSMUST00000214811			Gpx4-ps2			transcribed_processed_pseudogene
e11ve16_cond2_1163	chr10	46338132	46339348	+	9.04495	NA	Intergenic	Intergenic	37923	ENSMUST00000217441.1	ENSMUSG00000111182	ENSMUST00000217441			Gm35430			lncRNA
e11ve16_cond2_1164	chr10	46712986	46713231	+	5.34947	NA	Intergenic	Intergenic	42964	ENSMUST00000217086.1	ENSMUSG00000111754	ENSMUST00000217086			Gm19994			processed_pseudogene
e11ve16_cond2_1165	chr10	46785521	46786447	+	9.51478	NA	Intergenic	Intergenic	52523	ENSMUST00000083784.1	ENSMUSG00000065718	ENSMUST00000083784			Gm25650			snRNA
e11ve16_cond2_1166	chr10	50592145	50593011	+	11.1489	NA	promoter-TSS (ENSMUST00000035606.9)	protein_coding-promoter-TSS (ENSMUST00000035606.9)	-91	ENSMUST00000035606.9	ENSMUSG00000038774	ENSMUST00000217725			Ascc3			protein_coding
e11ve16_cond2_1167	chr10	51861133	51861633	+	5.8327	NA	Intergenic	Intergenic	-27242	ENSMUST00000157573.1	ENSMUSG00000088198	ENSMUST00000157573			Gm23906			snoRNA
e11ve16_cond2_1168	chr10	51926481	51927308	+	6.73665	NA	intron (ENSMUST00000218243.1, intron 2 of 2)	lncRNA-intron (ENSMUST00000218243.1, intron 2 of 2)	38269	ENSMUST00000157573.1	ENSMUSG00000088198	ENSMUST00000157573			Gm23906			snoRNA
e11ve16_cond2_1169	chr10	51946461	51947319	+	16.2186	NA	intron (ENSMUST00000218243.1, intron 1 of 2)	lncRNA-intron (ENSMUST00000218243.1, intron 1 of 2)	23375	ENSMUST00000218243.1	ENSMUSG00000112659	ENSMUST00000218796			Gm40646			lncRNA
e11ve16_cond2_1170	chr10	52194926	52195824	+	11.6705	NA	promoter-TSS (ENSMUST00000020045.9)	protein_coding-promoter-TSS (ENSMUST00000020045.9)	-131	ENSMUST00000020045.9	ENSMUSG00000019893	ENSMUST00000219173			Ros1			protein_coding
e11ve16_cond2_1171	chr10	52233370	52233628	+	3.66341	NA	promoter-TSS (ENSMUST00000069004.13)	protein_coding-promoter-TSS (ENSMUST00000069004.13)	-120	ENSMUST00000069004.13	ENSMUSG00000019891	ENSMUST00000218278			Dcbld1			protein_coding
e11ve16_cond2_1172	chr10	52278278	52278499	+	5.33029	NA	intron (ENSMUST00000069004.13, intron 2 of 10)	protein_coding-intron (ENSMUST00000069004.13, intron 2 of 10)	44751	ENSMUST00000218582.1	ENSMUSG00000019891	ENSMUST00000218278			Dcbld1			protein_coding
e11ve16_cond2_1173	chr10	52381910	52382835	+	5.30733	NA	promoter-TSS (ENSMUST00000020008.9)	protein_coding-promoter-TSS (ENSMUST00000020008.9)	-248	ENSMUST00000105475.8	ENSMUSG00000019861	ENSMUST00000217995			Gopc			protein_coding
e11ve16_cond2_1174	chr10	52417146	52417809	+	10.444	NA	promoter-TSS (ENSMUST00000023830.15)	protein_coding-promoter-TSS (ENSMUST00000023830.15)	-70	ENSMUST00000023830.15	ENSMUSG00000023068	ENSMUST00000218983			Nus1			protein_coding
e11ve16_cond2_1175	chr10	52528793	52529035	+	59.7194	NA	exon (ENSMUST00000218112.1, exon 1 of 1)	processed_pseudogene-exon (ENSMUST00000218112.1, exon 1 of 1)	395	ENSMUST00000218112.1	ENSMUSG00000112791	ENSMUST00000218112			Gm47612			processed_pseudogene
e11ve16_cond2_1176	chr10	52704251	52704829	+	6.65869	NA	intron (ENSMUST00000105473.2, intron 1 of 7)	protein_coding-intron (ENSMUST00000105473.2, intron 1 of 7)	10702	ENSMUST00000220050.1	ENSMUSG00000111918	ENSMUST00000220050			Gm47624			TEC
e11ve16_cond2_1177	chr10	52923399	52923661	+	5.09416	NA	intron (ENSMUST00000105473.2, intron 1 of 7)	protein_coding-intron (ENSMUST00000105473.2, intron 1 of 7)	17892	ENSMUST00000157697.1	ENSMUSG00000088322	ENSMUST00000157697			Gm25664			snRNA
e11ve16_cond2_1178	chr10	52938353	52938559	+	3.46298	NA	intron (ENSMUST00000105473.2, intron 2 of 7)	protein_coding-intron (ENSMUST00000105473.2, intron 2 of 7)	32818	ENSMUST00000157697.1	ENSMUSG00000088322	ENSMUST00000157697			Gm25664			snRNA
e11ve16_cond2_1179	chr10	53379411	53379926	+	9.04125	NA	exon (ENSMUST00000220436.1, exon 1 of 1)	TEC-exon (ENSMUST00000220436.1, exon 1 of 1)	216	ENSMUST00000220436.1	ENSMUSG00000111892	ENSMUST00000220436			Gm47641			TEC
e11ve16_cond2_1180	chr10	53580320	53580990	+	4.37205	NA	intron (ENSMUST00000237608.1, intron 8 of 13)	protein_coding-intron (ENSMUST00000075540.7, intron 8 of 13)	-4899	ENSMUST00000219731.1	ENSMUSG00000112731	ENSMUST00000219731			Gm47739			lncRNA
e11ve16_cond2_1181	chr10	53596792	53596993	+	5.01916	NA	promoter-TSS (ENSMUST00000020004.7)	protein_coding-promoter-TSS (ENSMUST00000020004.7)	-60	ENSMUST00000020004.7	ENSMUSG00000019857	ENSMUST00000219533			Asf1a			protein_coding
e11ve16_cond2_1182	chr10	53629467	53630207	+	6.21378	NA	exon (ENSMUST00000075540.7, exon 2 of 14)	protein_coding-exon (ENSMUST00000075540.7, exon 2 of 14)	122	ENSMUST00000218549.2	ENSMUSG00000058298	ENSMUST00000220260			Mcm9			protein_coding
e11ve16_cond2_1183	chr10	53685458	53686472	+	13.0813	NA	intron (ENSMUST00000163761.7, intron 4 of 14)	protein_coding-intron (ENSMUST00000020003.14, intron 5 of 17)	-6911	ENSMUST00000168949.1	ENSMUSG00000019856	ENSMUST00000168949			Fam184a			protein_coding
e11ve16_cond2_1184	chr10	53740045	53740638	+	9.73855	NA	intron (ENSMUST00000170839.1, intron 1 of 2)	protein_coding-intron (ENSMUST00000020003.14, intron 1 of 17)	10568	ENSMUST00000170839.1	ENSMUSG00000019856	ENSMUST00000168949			Fam184a			protein_coding
e11ve16_cond2_1185	chr10	53887983	53888470	+	4.97133	NA	Intergenic	Intergenic	-84697	ENSMUST00000217870.1	ENSMUSG00000112809	ENSMUST00000217870			Gm47915			lncRNA
e11ve16_cond2_1186	chr10	53934765	53935253	+	22.8267	NA	exon (ENSMUST00000003843.15, exon 7 of 13)	protein_coding-exon (ENSMUST00000003843.15, exon 7 of 13)	42106	ENSMUST00000219234.1	ENSMUSG00000003746	ENSMUST00000105469			Man1a			protein_coding
e11ve16_cond2_1187	chr10	54039829	54040962	+	33.8793	NA	intron (ENSMUST00000105469.1, intron 2 of 5)	protein_coding-intron (ENSMUST00000220088.1, intron 2 of 12)	-23416	ENSMUST00000219148.1	ENSMUSG00000112824	ENSMUST00000219148			Gm47917			lncRNA
e11ve16_cond2_1188	chr10	54075200	54075744	+	6.19581	NA	promoter-TSS (ENSMUST00000181899.1)	lncRNA-promoter-TSS (ENSMUST00000181899.1)	237	ENSMUST00000146483.7	ENSMUSG00000003746	ENSMUST00000105469			Man1a			protein_coding
e11ve16_cond2_1189	chr10	55980410	55980932	+	3.71999	NA	Intergenic	Intergenic	121332	ENSMUST00000218919.1	ENSMUSG00000112528	ENSMUST00000218919			Gm29794			processed_pseudogene
e11ve16_cond2_1190	chr10	56099627	56100725	+	35.9053	NA	TTS (ENSMUST00000218919.1)	processed_pseudogene-TTS (ENSMUST00000218919.1)	1827	ENSMUST00000218919.1	ENSMUSG00000112528	ENSMUST00000218919			Gm29794			processed_pseudogene
e11ve16_cond2_1191	chr10	56106486	56107493	+	10.8411	NA	promoter-TSS (ENSMUST00000063138.7)	protein_coding-promoter-TSS (ENSMUST00000063138.7)	72	ENSMUST00000063138.7	ENSMUSG00000047669	ENSMUST00000217668			Msl3l2			protein_coding
e11ve16_cond2_1192	chr10	56228798	56229047	+	4.5053	NA	promoter-TSS (ENSMUST00000099739.4)	protein_coding-promoter-TSS (ENSMUST00000099739.4)	-233	ENSMUST00000099739.4	ENSMUSG00000038122	ENSMUST00000219385			Tbc1d32			protein_coding
e11ve16_cond2_1193	chr10	56378771	56379136	+	4.78808	NA	intron (ENSMUST00000218444.1, intron 1 of 1)	protein_coding-intron (ENSMUST00000218444.1, intron 1 of 1)	-135	ENSMUST00000220069.1	ENSMUSG00000050953	ENSMUST00000220194			Gja1			protein_coding
e11ve16_cond2_1194	chr10	56486521	56486852	+	7.84705	NA	Intergenic	Intergenic	-10655	ENSMUST00000219246.1	ENSMUSG00000112825	ENSMUST00000219246			Gm9118			processed_pseudogene
e11ve16_cond2_1195	chr10	56610827	56611123	+	3.89385	NA	Intergenic	Intergenic	-45219	ENSMUST00000062156.7	ENSMUSG00000045048	ENSMUST00000062156			Gm9795			processed_pseudogene
e11ve16_cond2_1196	chr10	56674020	56674551	+	5.25494	NA	Intergenic	Intergenic	18091	ENSMUST00000062156.7	ENSMUSG00000045048	ENSMUST00000062156			Gm9795			processed_pseudogene
e11ve16_cond2_1197	chr10	56687620	56688045	+	8.50963	NA	Intergenic	Intergenic	31638	ENSMUST00000062156.7	ENSMUSG00000045048	ENSMUST00000062156			Gm9795			processed_pseudogene
e11ve16_cond2_1198	chr10	56808828	56809408	+	6.82442	NA	Intergenic	Intergenic	20189	ENSMUST00000219666.1	ENSMUSG00000112191	ENSMUST00000219666			Gm31931			processed_pseudogene
e11ve16_cond2_1199	chr10	56847662	56847986	+	5.29725	NA	Intergenic	Intergenic	-18517	ENSMUST00000219666.1	ENSMUSG00000112191	ENSMUST00000219666			Gm31931			processed_pseudogene
e11ve16_cond2_1200	chr10	56956745	56957400	+	21.804	NA	Intergenic	Intergenic	25160	ENSMUST00000220080.1	ENSMUSG00000112327	ENSMUST00000220080			Gm36827			lncRNA
e11ve16_cond2_1201	chr10	56963162	56963786	+	18.8483	NA	Intergenic	Intergenic	18758	ENSMUST00000220080.1	ENSMUSG00000112327	ENSMUST00000220080			Gm36827			lncRNA
e11ve16_cond2_1202	chr10	56969451	56969656	+	4.33163	NA	TTS (ENSMUST00000220080.1)	lncRNA-TTS (ENSMUST00000220080.1)	12679	ENSMUST00000220080.1	ENSMUSG00000112327	ENSMUST00000220080			Gm36827			lncRNA
e11ve16_cond2_1203	chr10	56980524	56981415	+	7.17149	NA	intron (ENSMUST00000220080.1, intron 2 of 5)	lncRNA-intron (ENSMUST00000220080.1, intron 2 of 5)	1263	ENSMUST00000220080.1	ENSMUSG00000112327	ENSMUST00000220080			Gm36827			lncRNA
e11ve16_cond2_1204	chr10	57156372	57157357	+	17.7316	NA	intron (ENSMUST00000218944.1, intron 3 of 3)	lncRNA-intron (ENSMUST00000218944.1, intron 3 of 3)	-17166	ENSMUST00000157628.1	ENSMUSG00000088253	ENSMUST00000157628			Gm24285			snRNA
e11ve16_cond2_1205	chr10	57486167	57486706	+	9.44024	NA	promoter-TSS (ENSMUST00000079833.5)	protein_coding-promoter-TSS (ENSMUST00000079833.5)	11	ENSMUST00000220042.1	ENSMUSG00000019878	ENSMUST00000220162			Hsf2			protein_coding
e11ve16_cond2_1206	chr10	57762980	57763575	+	5.13169	NA	Intergenic	Intergenic	-19077	ENSMUST00000177265.1	ENSMUSG00000093552	ENSMUST00000177265			Gm5777			processed_pseudogene
e11ve16_cond2_1207	chr10	57794590	57795192	+	6.28105	NA	intron (ENSMUST00000125076.1, intron 1 of 4)	protein_coding-intron (ENSMUST00000020022.7, intron 1 of 7)	323	ENSMUST00000125076.1	ENSMUSG00000019872	ENSMUST00000125076			Smpdl3a			protein_coding
e11ve16_cond2_1208	chr10	58223659	58224144	+	142.954	NA	promoter-TSS (ENSMUST00000075305.1)	protein_coding-promoter-TSS (ENSMUST00000075305.1)	-375	ENSMUST00000075305.1	ENSMUSG00000058537	ENSMUST00000204003			AW822073			protein_coding
e11ve16_cond2_1209	chr10	58225206	58225543	+	127.082	NA	promoter-TSS (ENSMUST00000204003.1)	protein_coding-promoter-TSS (ENSMUST00000204003.1)	-444	ENSMUST00000204003.1	ENSMUSG00000058537	ENSMUST00000204003			AW822073			protein_coding
e11ve16_cond2_1210	chr10	58231200	58231577	+	107.84	NA	exon (ENSMUST00000176875.3, exon 1 of 1)	protein_coding-exon (ENSMUST00000176875.3, exon 1 of 1)	625	ENSMUST00000174056.3	ENSMUSG00000075046	ENSMUST00000176875			Duxf3			protein_coding
e11ve16_cond2_1211	chr10	58232476	58232837	+	94.7472	NA	promoter-TSS (ENSMUST00000174056.3)	protein_coding-promoter-TSS (ENSMUST00000174056.3)	19	ENSMUST00000176875.3	ENSMUSG00000075046	ENSMUST00000176875			Duxf3			protein_coding
e11ve16_cond2_1212	chr10	58233549	58233966	+	88.8077	NA	Intergenic	Intergenic	-1082	ENSMUST00000176875.3	ENSMUSG00000075046	ENSMUST00000176875			Duxf3			protein_coding
e11ve16_cond2_1213	chr10	58239201	58239625	+	80.6493	NA	TTS (ENSMUST00000176240.2)	unprocessed_pseudogene-TTS (ENSMUST00000176240.2)	1248	ENSMUST00000176240.2	ENSMUSG00000093601	ENSMUST00000176240			Gm19459			unprocessed_pseudogene
e11ve16_cond2_1214	chr10	58323132	58323543	+	4.40318	NA	promoter-TSS (ENSMUST00000020078.13)	protein_coding-promoter-TSS (ENSMUST00000020078.13)	-129	ENSMUST00000020078.13	ENSMUSG00000019920	ENSMUST00000020078			Lims1			protein_coding
e11ve16_cond2_1215	chr10	58364919	58365254	+	3.86425	NA	intron (ENSMUST00000020078.13, intron 1 of 9)	protein_coding-intron (ENSMUST00000020078.13, intron 1 of 9)	-6368	ENSMUST00000238939.1	ENSMUSG00000019920	ENSMUST00000020078			Lims1			protein_coding
e11ve16_cond2_1216	chr10	58395438	58396197	+	9.53728	NA	intron (ENSMUST00000105468.1, intron 1 of 9)	protein_coding-intron (ENSMUST00000020077.10, intron 1 of 10)	1429	ENSMUST00000105468.1	ENSMUSG00000019920	ENSMUST00000020078			Lims1			protein_coding
e11ve16_cond2_1217	chr10	58398707	58399272	+	19.7367	NA	intron (ENSMUST00000105468.1, intron 1 of 9)	protein_coding-intron (ENSMUST00000020077.10, intron 1 of 10)	4601	ENSMUST00000105468.1	ENSMUSG00000019920	ENSMUST00000020078			Lims1			protein_coding
e11ve16_cond2_1218	chr10	58608635	58609185	+	13.0298	NA	intron (ENSMUST00000003312.4, intron 9 of 11)	protein_coding-intron (ENSMUST00000003312.4, intron 9 of 11)	53643	ENSMUST00000219887.1	ENSMUSG00000112670	ENSMUST00000219887			Gm18042			processed_pseudogene
e11ve16_cond2_1219	chr10	58675506	58675807	+	5.48212	NA	promoter-TSS (ENSMUST00000003312.4)	protein_coding-promoter-TSS (ENSMUST00000003312.4)	-2	ENSMUST00000003312.4	ENSMUSG00000003227	ENSMUST00000003312			Edar			protein_coding
e11ve16_cond2_1220	chr10	58713684	58714275	+	5.57764	NA	intron (ENSMUST00000169859.1, intron 1 of 1)	protein_coding-intron (ENSMUST00000169859.1, intron 1 of 1)	4231	ENSMUST00000169859.1	ENSMUSG00000091731	ENSMUST00000169859			Gm17542			protein_coding
e11ve16_cond2_1221	chr10	58746534	58747320	+	12.3667	NA	Intergenic	Intergenic	-10343	ENSMUST00000218604.1	ENSMUSG00000112424	ENSMUST00000218604			Gm6494			processed_pseudogene
e11ve16_cond2_1222	chr10	58855118	58855478	+	3.97902	NA	intron (ENSMUST00000135526.8, intron 1 of 3)	protein_coding-intron (ENSMUST00000133151.1, intron 1 of 2)	41239	ENSMUST00000133151.1	ENSMUSG00000037990	ENSMUST00000148267			Sh3rf3			protein_coding
e11ve16_cond2_1223	chr10	58916145	58916359	+	4.57103	NA	intron (ENSMUST00000135526.8, intron 1 of 3)	protein_coding-intron (ENSMUST00000133151.1, intron 1 of 2)	-49291	ENSMUST00000183751.1	ENSMUSG00000098653	ENSMUST00000183751			Gm27672			miRNA
e11ve16_cond2_1224	chr10	59114818	59115161	+	4.3828	NA	intron (ENSMUST00000153031.1, intron 8 of 9)	protein_coding-intron (ENSMUST00000153031.1, intron 8 of 9)	34955	ENSMUST00000152924.1	ENSMUSG00000037990	ENSMUST00000148267			Sh3rf3			protein_coding
e11ve16_cond2_1225	chr10	59116225	59116747	+	5.78638	NA	intron (ENSMUST00000153031.1, intron 8 of 9)	protein_coding-intron (ENSMUST00000153031.1, intron 8 of 9)	36452	ENSMUST00000152924.1	ENSMUSG00000037990	ENSMUST00000148267			Sh3rf3			protein_coding
e11ve16_cond2_1226	chr10	59241165	59241518	+	9.67931	NA	Intergenic	Intergenic	19388	ENSMUST00000182161.1	ENSMUSG00000098188	ENSMUST00000182161			Sowahc			protein_coding
e11ve16_cond2_1227	chr10	59252146	59252599	+	10.6503	NA	Intergenic	Intergenic	30419	ENSMUST00000182161.1	ENSMUSG00000098188	ENSMUST00000182161			Sowahc			protein_coding
e11ve16_cond2_1228	chr10	59295364	59296478	+	115.195	NA	Intergenic	Intergenic	-27375	ENSMUST00000009789.14	ENSMUSG00000019916	ENSMUST00000105466			P4ha1			protein_coding
e11ve16_cond2_1229	chr10	59425079	59425860	+	43.8769	NA	exon (ENSMUST00000009798.4, exon 8 of 9)	protein_coding-exon (ENSMUST00000009798.4, exon 8 of 9)	5617	ENSMUST00000162493.1	ENSMUSG00000009654	ENSMUST00000162493			Oit3			protein_coding
e11ve16_cond2_1230	chr10	59500059	59500522	+	4.64967	NA	intron (ENSMUST00000020312.12, intron 1 of 7)	protein_coding-intron (ENSMUST00000020312.12, intron 1 of 7)	-42130	ENSMUST00000009791.6	ENSMUSG00000009647	ENSMUST00000009791			Mcu			protein_coding
e11ve16_cond2_1231	chr10	59628749	59629111	+	5.9068	NA	Intergenic	Intergenic	-12238	ENSMUST00000020312.12	ENSMUSG00000009647	ENSMUST00000009791			Mcu			protein_coding
e11ve16_cond2_1232	chr10	59667071	59668021	+	7.52241	NA	Intergenic	Intergenic	-34931	ENSMUST00000165563.7	ENSMUSG00000020111	ENSMUST00000171409			Micu1			protein_coding
e11ve16_cond2_1233	chr10	59943497	59943944	+	4.92694	NA	Intergenic	Intergenic	8114	ENSMUST00000020308.4	ENSMUSG00000020108	ENSMUST00000020308			Ddit4			protein_coding
e11ve16_cond2_1234	chr10	59950788	59952678	+	106.603	NA	exon (ENSMUST00000020308.4, exon 1 of 3)	protein_coding-exon (ENSMUST00000020308.4, exon 1 of 3)	101	ENSMUST00000020308.4	ENSMUSG00000020108	ENSMUST00000020308			Ddit4			protein_coding
e11ve16_cond2_1235	chr10	59978702	59979438	+	9.99671	NA	Intergenic	Intergenic	11313	ENSMUST00000182925.1	ENSMUSG00000020107	ENSMUST00000182116			Anapc16			protein_coding
e11ve16_cond2_1236	chr10	60002558	60003649	+	111.795	NA	promoter-TSS (ENSMUST00000020307.10)	protein_coding-promoter-TSS (ENSMUST00000020307.10)	8	ENSMUST00000020307.10	ENSMUSG00000020107	ENSMUST00000182116			Anapc16			protein_coding
e11ve16_cond2_1237	chr10	60185719	60186219	+	4.51174	NA	exon (ENSMUST00000068690.6, exon 2 of 2)	protein_coding-exon (ENSMUST00000068690.6, exon 2 of 2)	2738	ENSMUST00000068690.6	ENSMUSG00000057337	ENSMUST00000135158			Chst3			protein_coding
e11ve16_cond2_1238	chr10	60186440	60186943	+	5.1568	NA	exon (ENSMUST00000068690.6, exon 2 of 2)	protein_coding-exon (ENSMUST00000068690.6, exon 2 of 2)	2016	ENSMUST00000068690.6	ENSMUSG00000057337	ENSMUST00000135158			Chst3			protein_coding
e11ve16_cond2_1239	chr10	61536285	61536993	+	9.55404	NA	intron (ENSMUST00000049242.8, intron 3 of 4)	protein_coding-intron (ENSMUST00000049242.8, intron 3 of 4)	-26054	ENSMUST00000219782.1	ENSMUSG00000112710	ENSMUST00000219782			Gm17829			processed_pseudogene
e11ve16_cond2_1240	chr10	61756969	61757510	+	6.09873	NA	intron (ENSMUST00000020283.4, intron 2 of 8)	protein_coding-intron (ENSMUST00000020283.4, intron 2 of 8)	-17498	ENSMUST00000175276.1	ENSMUSG00000093017	ENSMUST00000175276			Mir5108			miRNA
e11ve16_cond2_1241	chr10	62221058	62221576	+	9.45342	NA	intron (ENSMUST00000047883.10, intron 1 of 7)	protein_coding-intron (ENSMUST00000047883.10, intron 1 of 7)	9934	ENSMUST00000047883.10	ENSMUSG00000037031	ENSMUST00000218394			Tspan15			protein_coding
e11ve16_cond2_1242	chr10	62222063	62223131	+	6.574	NA	intron (ENSMUST00000047883.10, intron 1 of 7)	protein_coding-intron (ENSMUST00000047883.10, intron 1 of 7)	8654	ENSMUST00000047883.10	ENSMUSG00000037031	ENSMUST00000218394			Tspan15			protein_coding
e11ve16_cond2_1243	chr10	63032173	63032590	+	3.72054	NA	intron (ENSMUST00000020262.4, intron 1 of 9)	protein_coding-intron (ENSMUST00000020262.4, intron 1 of 9)	7869	ENSMUST00000020262.4	ENSMUSG00000020072	ENSMUST00000124784			Pbld2			protein_coding
e11ve16_cond2_1244	chr10	63177321	63177659	+	4.67942	NA	intron (ENSMUST00000095580.2, intron 2 of 19)	protein_coding-intron (ENSMUST00000095580.2, intron 2 of 19)	26462	ENSMUST00000095580.2	ENSMUSG00000020067	ENSMUST00000095580			Mypn			protein_coding
e11ve16_cond2_1245	chr10	63972526	63972792	+	4.25728	NA	intron (ENSMUST00000131945.1, intron 1 of 1)	protein_coding-intron (ENSMUST00000075099.4, intron 6 of 16)	-45225	ENSMUST00000079279.3	ENSMUSG00000062561	ENSMUST00000079279			Gm10118			TEC
e11ve16_cond2_1246	chr10	64049219	64049437	+	10.981	NA	intron (ENSMUST00000131945.1, intron 1 of 1)	protein_coding-intron (ENSMUST00000075099.4, intron 6 of 16)	40919	ENSMUST00000148712.1	ENSMUSG00000042846	ENSMUST00000133588			Lrrtm3			protein_coding
e11ve16_cond2_1247	chr10	64076168	64077321	+	8.50232	NA	intron (ENSMUST00000131945.1, intron 1 of 1)	protein_coding-intron (ENSMUST00000075099.4, intron 6 of 16)	13503	ENSMUST00000148712.1	ENSMUSG00000042846	ENSMUST00000133588			Lrrtm3			protein_coding
e11ve16_cond2_1248	chr10	66414389	66414667	+	4.84252	NA	Intergenic	Intergenic	-69025	ENSMUST00000104251.1	ENSMUSG00000077439	ENSMUST00000104251			Gm22594			snoRNA
e11ve16_cond2_1249	chr10	66683261	66683863	+	13.1159	NA	Intergenic	Intergenic	8053	ENSMUST00000218242.1	ENSMUSG00000112247	ENSMUST00000218242			Gm47894			processed_pseudogene
e11ve16_cond2_1250	chr10	66752354	66753066	+	12.4855	NA	Intergenic	Intergenic	-6744	ENSMUST00000220363.1	ENSMUSG00000112383	ENSMUST00000220363			Gm47895			lncRNA
e11ve16_cond2_1251	chr10	66920870	66921905	+	11.2653	NA	exon (ENSMUST00000181018.2, exon 2 of 3)	lncRNA-exon (ENSMUST00000181018.2, exon 2 of 3)	1085	ENSMUST00000181018.2	ENSMUSG00000097921	ENSMUST00000181018			Gm26576			lncRNA
e11ve16_cond2_1252	chr10	66928311	66928538	+	5.25976	NA	Intergenic	Intergenic	8122	ENSMUST00000181018.2	ENSMUSG00000097921	ENSMUST00000181018			Gm26576			lncRNA
e11ve16_cond2_1253	chr10	67025669	67026199	+	3.77411	NA	intron (ENSMUST00000219739.1, intron 2 of 6)	protein_coding-intron (ENSMUST00000020023.8, intron 5 of 7)	-2431	ENSMUST00000218205.1	ENSMUSG00000112925	ENSMUST00000217788			Gm31763			lncRNA
e11ve16_cond2_1254	chr10	67192778	67193695	+	10.4644	NA	intron (ENSMUST00000173689.7, intron 2 of 24)	protein_coding-intron (ENSMUST00000051446.15, intron 3 of 25)	7483	ENSMUST00000173949.1	ENSMUSG00000037876	ENSMUST00000173661			Jmjd1c			protein_coding
e11ve16_cond2_1255	chr10	67283856	67284077	+	3.27019	NA	intron (ENSMUST00000159002.1, intron 1 of 4)	protein_coding-intron (ENSMUST00000077839.12, intron 1 of 3)	1214	ENSMUST00000159002.1	ENSMUSG00000075000	ENSMUST00000159002			Nrbf2			protein_coding
e11ve16_cond2_1256	chr10	67400508	67400727	+	3.41579	NA	intron (ENSMUST00000220398.1, intron 3 of 4)	lncRNA-intron (ENSMUST00000220398.1, intron 3 of 4)	-23377	ENSMUST00000220168.1	ENSMUSG00000112848	ENSMUST00000220168			Gm32023			lncRNA
e11ve16_cond2_1257	chr10	67634029	67635108	+	31.4029	NA	Intergenic	Intergenic	-30791	ENSMUST00000219396.1	ENSMUSG00000112097	ENSMUST00000219396			Gm32515			lncRNA
e11ve16_cond2_1258	chr10	67785625	67786422	+	7.64455	NA	exon (ENSMUST00000219006.1, exon 1 of 1)	TEC-exon (ENSMUST00000219006.1, exon 1 of 1)	274	ENSMUST00000232007.1	ENSMUSG00000116971	ENSMUST00000232007			Gm49766			lncRNA
e11ve16_cond2_1259	chr10	67791539	67791789	+	4.7726	NA	intron (ENSMUST00000232007.1, intron 2 of 5)	lncRNA-intron (ENSMUST00000232007.1, intron 2 of 5)	1538	ENSMUST00000219270.1	ENSMUSG00000111956	ENSMUST00000219270			Gm29774			processed_pseudogene
e11ve16_cond2_1260	chr10	67845849	67846723	+	29.3813	NA	Intergenic	Intergenic	52721	ENSMUST00000127869.1	ENSMUSG00000037855	ENSMUST00000127869			Zfp365			protein_coding
e11ve16_cond2_1261	chr10	68095255	68095696	+	5.52742	NA	TTS (ENSMUST00000020106.8)	protein_coding-TTS (ENSMUST00000020106.8)	41151	ENSMUST00000218532.1	ENSMUSG00000019947	ENSMUST00000218425			Arid5b			protein_coding
e11ve16_cond2_1262	chr10	68504441	68504996	+	8.19885	NA	intron (ENSMUST00000020103.8, intron 5 of 7)	protein_coding-intron (ENSMUST00000020103.8, intron 5 of 7)	21049	ENSMUST00000166919.3	ENSMUSG00000019945	ENSMUST00000166919			Cabcoco1			protein_coding
e11ve16_cond2_1263	chr10	68582888	68583196	+	3.57115	NA	Intergenic	Intergenic	-41146	ENSMUST00000020103.8	ENSMUSG00000019945	ENSMUST00000166919			Cabcoco1			protein_coding
e11ve16_cond2_1264	chr10	68589494	68590223	+	21.7144	NA	Intergenic	Intergenic	-47962	ENSMUST00000020103.8	ENSMUSG00000019945	ENSMUST00000166919			Cabcoco1			protein_coding
e11ve16_cond2_1265	chr10	69067476	69068041	+	18.7998	NA	Intergenic	Intergenic	30108	ENSMUST00000218524.1	ENSMUSG00000112083	ENSMUST00000218524			Gm47107			lncRNA
e11ve16_cond2_1266	chr10	69107138	69107526	+	4.93913	NA	Intergenic	Intergenic	-9466	ENSMUST00000218524.1	ENSMUSG00000112083	ENSMUST00000218524			Gm47107			lncRNA
e11ve16_cond2_1267	chr10	69274458	69275005	+	13.1327	NA	intron (ENSMUST00000164034.7, intron 7 of 10)	protein_coding-intron (ENSMUST00000020101.11, intron 7 of 10)	-4614	ENSMUST00000163760.1	ENSMUSG00000019944	ENSMUST00000168117			Rhobtb1			protein_coding
e11ve16_cond2_1268	chr10	69446022	69446228	+	5.42278	NA	intron (ENSMUST00000217780.1, intron 1 of 1)	protein_coding-intron (ENSMUST00000217780.1, intron 1 of 1)	-22377	ENSMUST00000218846.1	ENSMUSG00000111899	ENSMUST00000218846			Gm18636			processed_pseudogene
e11ve16_cond2_1269	chr10	69595178	69595795	+	4.31679	NA	exon (ENSMUST00000182379.6, exon 2 of 3)	protein_coding-exon (ENSMUST00000182379.6, exon 2 of 3)	-29125	ENSMUST00000220152.1	ENSMUSG00000112729	ENSMUST00000220152			Gm46231			processed_pseudogene
e11ve16_cond2_1270	chr10	69611859	69612249	+	13.7547	NA	intron (ENSMUST00000182379.6, intron 2 of 2)	protein_coding-intron (ENSMUST00000047061.12, intron 1 of 16)	-45693	ENSMUST00000220152.1	ENSMUSG00000112729	ENSMUST00000220152			Gm46231			processed_pseudogene
e11ve16_cond2_1271	chr10	69652313	69653383	+	17.0139	NA	intron (ENSMUST00000182379.6, intron 2 of 2)	protein_coding-intron (ENSMUST00000047061.12, intron 1 of 16)	-53448	ENSMUST00000182142.1	ENSMUSG00000069601	ENSMUST00000092434			Ank3			protein_coding
e11ve16_cond2_1272	chr10	69697267	69697561	+	4.53455	NA	intron (ENSMUST00000182379.6, intron 2 of 2)	protein_coding-intron (ENSMUST00000047061.12, intron 1 of 16)	-8882	ENSMUST00000182142.1	ENSMUSG00000069601	ENSMUST00000092434			Ank3			protein_coding
e11ve16_cond2_1273	chr10	69829445	69829765	+	5.6137	NA	intron (ENSMUST00000182474.7, intron 7 of 36)	protein_coding-intron (ENSMUST00000047061.12, intron 1 of 16)	42149	ENSMUST00000183240.1	ENSMUSG00000069601	ENSMUST00000092434			Ank3			protein_coding
e11ve16_cond2_1274	chr10	69872163	69873111	+	21.9167	NA	TTS (ENSMUST00000182194.7)	protein_coding-TTS (ENSMUST00000182194.7)	-25494	ENSMUST00000182972.7	ENSMUSG00000069601	ENSMUST00000092434			Ank3			protein_coding
e11ve16_cond2_1275	chr10	70181099	70182235	+	18.3803	NA	intron (ENSMUST00000147545.7, intron 6 of 8)	protein_coding-intron (ENSMUST00000135607.1, intron 1 of 2)	6620	ENSMUST00000135607.1	ENSMUSG00000048701	ENSMUST00000147545			Ccdc6			protein_coding
e11ve16_cond2_1276	chr10	70263950	70264387	+	4.75455	NA	intron (ENSMUST00000046807.6, intron 2 of 5)	protein_coding-intron (ENSMUST00000046807.6, intron 2 of 5)	-2811	ENSMUST00000155933.1	ENSMUSG00000037762	ENSMUST00000046807			Slc16a9			protein_coding
e11ve16_cond2_1277	chr10	70643339	70643561	+	3.90762	NA	intron (ENSMUST00000162793.7, intron 1 of 5)	protein_coding-intron (ENSMUST00000161687.7, intron 1 of 3)	8475	ENSMUST00000162571.7	ENSMUSG00000037747	ENSMUST00000162571			Phyhipl			protein_coding
e11ve16_cond2_1278	chr10	71024846	71025491	+	4.93058	NA	intron (ENSMUST00000131445.7, intron 3 of 21)	protein_coding-intron (ENSMUST00000014473.5, intron 3 of 21)	-32128	ENSMUST00000219321.1	ENSMUSG00000112745	ENSMUST00000219321			Gm48025			lncRNA
e11ve16_cond2_1279	chr10	71058888	71059087	+	4.17935	NA	intron (ENSMUST00000131445.7, intron 2 of 21)	protein_coding-intron (ENSMUST00000014473.5, intron 2 of 21)	-23889	ENSMUST00000160178.1	ENSMUSG00000090212	ENSMUST00000160178			Gm15647			lncRNA
e11ve16_cond2_1280	chr10	71118767	71120160	+	5.60989	NA	intron (ENSMUST00000143791.7, intron 1 of 20)	protein_coding-intron (ENSMUST00000014473.5, intron 1 of 21)	27397	ENSMUST00000131445.7	ENSMUSG00000014329	ENSMUST00000144740			Bicc1			protein_coding
e11ve16_cond2_1281	chr10	71347624	71348076	+	5.95302	NA	promoter-TSS (ENSMUST00000079252.12)	protein_coding-promoter-TSS (ENSMUST00000079252.12)	7	ENSMUST00000141153.1	ENSMUSG00000060733	ENSMUST00000147277			Ipmk			protein_coding
e11ve16_cond2_1282	chr10	72616091	72616469	+	5.61464	NA	Intergenic	Intergenic	-38565	ENSMUST00000020081.10	ENSMUSG00000019923	ENSMUST00000160337			Zwint			protein_coding
e11ve16_cond2_1283	chr10	72713358	72714488	+	17.5466	NA	Intergenic	Intergenic	-4008	ENSMUST00000219599.1	ENSMUSG00000112862	ENSMUST00000219599			Gm47094			processed_pseudogene
e11ve16_cond2_1284	chr10	73907628	73908473	+	6.48448	NA	intron (ENSMUST00000105426.9, intron 1 of 32)	protein_coding-intron (ENSMUST00000064562.13, intron 1 of 30)	-39006	ENSMUST00000195531.5	ENSMUSG00000052613	ENSMUST00000092420			Pcdh15			protein_coding
e11ve16_cond2_1285	chr10	74966963	74967324	+	5.15248	NA	promoter-TSS (ENSMUST00000037813.4)	protein_coding-promoter-TSS (ENSMUST00000037813.4)	-34	ENSMUST00000037813.4	ENSMUSG00000040009	ENSMUST00000159991			Gnaz			protein_coding
e11ve16_cond2_1286	chr10	75104713	75105273	+	5.10805	NA	intron (ENSMUST00000164107.2, intron 1 of 22)	protein_coding-intron (ENSMUST00000164107.2, intron 1 of 22)	44401	ENSMUST00000164107.2	ENSMUSG00000009681	ENSMUST00000219807			Bcr			protein_coding
e11ve16_cond2_1287	chr10	75451289	75451909	+	5.29354	NA	intron (ENSMUST00000153125.7, intron 2 of 3)	protein_coding-intron (ENSMUST00000145890.7, intron 5 of 8)	8979	ENSMUST00000122673.1	ENSMUSG00000084622	ENSMUST00000122673			Gm25545			misc_RNA
e11ve16_cond2_1288	chr10	75456389	75456702	+	4.70531	NA	intron (ENSMUST00000153125.7, intron 2 of 3)	protein_coding-intron (ENSMUST00000145890.7, intron 5 of 8)	13925	ENSMUST00000122673.1	ENSMUSG00000084622	ENSMUST00000122673			Gm25545			misc_RNA
e11ve16_cond2_1289	chr10	75555926	75556671	+	8.99865	NA	intron (ENSMUST00000051129.9, intron 2 of 3)	protein_coding-intron (ENSMUST00000051129.9, intron 2 of 3)	-2404	ENSMUST00000220172.1	ENSMUSG00000046807	ENSMUST00000220172			Lrrc75b			protein_coding
e11ve16_cond2_1290	chr10	75591643	75592047	+	6.40988	NA	intron (ENSMUST00000189972.1, intron 1 of 1)	protein_coding-intron (ENSMUST00000072217.8, intron 1 of 11)	-1192	ENSMUST00000044101.2	ENSMUSG00000055872	ENSMUST00000044101			Gm9985			pseudogene
e11ve16_cond2_1291	chr10	75605323	75605714	+	4.70226	NA	TTS (ENSMUST00000189972.1)	protein_coding-TTS (ENSMUST00000189972.1)	1437	ENSMUST00000188444.1	ENSMUSG00000006344	ENSMUST00000189991			Ggt5			protein_coding
e11ve16_cond2_1292	chr10	75647323	75647947	+	10.1523	NA	intron (ENSMUST00000001712.7, intron 35 of 36)	protein_coding-intron (ENSMUST00000001712.7, intron 35 of 36)	-3627	ENSMUST00000218896.1	ENSMUSG00000006342	ENSMUST00000218896			Susd2			protein_coding
e11ve16_cond2_1293	chr10	75676456	75677115	+	7.32874	NA	intron (ENSMUST00000001712.7, intron 29 of 36)	protein_coding-intron (ENSMUST00000001712.7, intron 29 of 36)	-8691	ENSMUST00000217664.1	ENSMUSG00000020196	ENSMUST00000218480			Cabin1			protein_coding
e11ve16_cond2_1294	chr10	75677248	75677657	+	4.43718	NA	intron (ENSMUST00000001712.7, intron 29 of 36)	protein_coding-intron (ENSMUST00000001712.7, intron 29 of 36)	-9358	ENSMUST00000217664.1	ENSMUSG00000020196	ENSMUST00000218480			Cabin1			protein_coding
e11ve16_cond2_1295	chr10	75796828	75797436	+	11.4706	NA	exon (ENSMUST00000120177.7, exon 1 of 4)	protein_coding-exon (ENSMUST00000120177.7, exon 1 of 4)	437	ENSMUST00000120177.7	ENSMUSG00000001663	ENSMUST00000120177			Gstt1			protein_coding
e11ve16_cond2_1296	chr10	75920975	75922114	+	36.1736	NA	promoter-TSS (ENSMUST00000000925.9)	protein_coding-promoter-TSS (ENSMUST00000000925.9)	45	ENSMUST00000140388.1	ENSMUSG00000000902	ENSMUST00000140388			Smarcb1			protein_coding
e11ve16_cond2_1297	chr10	75930188	75930538	+	4.51951	NA	intron (ENSMUST00000219728.1, intron 1 of 3)	protein_coding-intron (ENSMUST00000000924.12, intron 1 of 7)	2112	ENSMUST00000120281.7	ENSMUSG00000000901	ENSMUST00000120281			Mmp11			protein_coding
e11ve16_cond2_1298	chr10	75945961	75946220	+	6.66114	NA	promoter-TSS (ENSMUST00000117331.1)	processed_pseudogene-promoter-TSS (ENSMUST00000117331.1)	-403	ENSMUST00000117331.1	ENSMUSG00000082234	ENSMUST00000117331			Gm16221			processed_pseudogene
e11ve16_cond2_1299	chr10	76288357	76288796	+	7.35495	NA	intron (ENSMUST00000160442.1, intron 2 of 5)	protein_coding-intron (ENSMUST00000036033.13, intron 18 of 37)	-2755	ENSMUST00000159807.7	ENSMUSG00000020231	ENSMUST00000160048			Dip2a			protein_coding
e11ve16_cond2_1300	chr10	76439331	76439611	+	17.682	NA	TTS (ENSMUST00000235907.1)	protein_coding-TTS (ENSMUST00000235907.1)	973	ENSMUST00000235907.1	ENSMUSG00000117965	ENSMUST00000235907			AC141477.1			protein_coding
e11ve16_cond2_1301	chr10	76442265	76443249	+	207.425	NA	promoter-TSS (ENSMUST00000001179.6)	protein_coding-promoter-TSS (ENSMUST00000001179.6)	29	ENSMUST00000217838.1	ENSMUSG00000001151	ENSMUST00000218747			Pcnt			protein_coding
e11ve16_cond2_1302	chr10	76447627	76448401	+	15.3116	NA	Intergenic	Intergenic	-1067	ENSMUST00000092406.11	ENSMUSG00000009114	ENSMUST00000092406			2610028H24Rik			protein_coding
e11ve16_cond2_1303	chr10	76537430	76537898	+	6.708	NA	intron (ENSMUST00000160671.7, intron 5 of 21)	protein_coding-intron (ENSMUST00000048678.6, intron 5 of 21)	-4218	ENSMUST00000163049.1	ENSMUSG00000033105	ENSMUST00000160671			Lss			protein_coding
e11ve16_cond2_1304	chr10	76634121	76634399	+	4.76938	NA	Intergenic	Intergenic	-10630	ENSMUST00000001181.12	ENSMUSG00000020241	ENSMUST00000137365			Col6a2			protein_coding
e11ve16_cond2_1305	chr10	77142304	77142840	+	4.55778	NA	intron (ENSMUST00000081654.12, intron 2 of 41)	protein_coding-intron (ENSMUST00000081654.12, intron 2 of 41)	5472	ENSMUST00000218871.1	ENSMUSG00000112612	ENSMUST00000218871			Gm7775			processed_pseudogene
e11ve16_cond2_1306	chr10	77226776	77227133	+	4.24722	NA	Intergenic	Intergenic	-32264	ENSMUST00000020493.8	ENSMUSG00000020260	ENSMUST00000020493			Pofut2			protein_coding
e11ve16_cond2_1307	chr10	77258769	77259732	+	154.113	NA	promoter-TSS (ENSMUST00000020493.8)	protein_coding-promoter-TSS (ENSMUST00000020493.8)	-27	ENSMUST00000105408.3	ENSMUSG00000078444	ENSMUST00000105408			Gm10941			lncRNA
e11ve16_cond2_1308	chr10	77291086	77291417	+	3.95398	NA	exon (ENSMUST00000020496.13, exon 11 of 11)	protein_coding-exon (ENSMUST00000020496.13, exon 11 of 11)	24334	ENSMUST00000218117.1	ENSMUSG00000020260	ENSMUST00000020493			Pofut2			protein_coding
e11ve16_cond2_1309	chr10	77464311	77464739	+	8.20923	NA	intron (ENSMUST00000218522.1, intron 2 of 3)	lncRNA-intron (ENSMUST00000218522.1, intron 2 of 3)	6608	ENSMUST00000218522.1	ENSMUSG00000112818	ENSMUST00000218522			Gm35920			lncRNA
e11ve16_cond2_1310	chr10	77581401	77582449	+	69.5902	NA	promoter-TSS (ENSMUST00000162943.8)	protein_coding-promoter-TSS (ENSMUST00000162943.8)	103	ENSMUST00000162598.1	ENSMUSG00000009291	ENSMUST00000009435			Pttg1ip			protein_coding
e11ve16_cond2_1311	chr10	77605024	77605385	+	5.07231	NA	promoter-TSS (ENSMUST00000020501.14)	protein_coding-promoter-TSS (ENSMUST00000020501.14)	-893	ENSMUST00000020501.14	ENSMUSG00000020265	ENSMUST00000173691			Sumo3			protein_coding
e11ve16_cond2_1312	chr10	77875654	77875867	+	3.7845	NA	intron (ENSMUST00000092368.9, intron 7 of 9)	protein_coding-intron (ENSMUST00000092366.3, intron 9 of 11)	11137	ENSMUST00000092368.9	ENSMUSG00000069581	ENSMUST00000092368			Tspear			protein_coding
e11ve16_cond2_1313	chr10	78297825	78298369	+	4.58341	NA	promoter-TSS (ENSMUST00000219008.1)	TEC-promoter-TSS (ENSMUST00000219008.1)	101	ENSMUST00000105389.7	ENSMUSG00000001211	ENSMUST00000105388			Agpat3			protein_coding
e11ve16_cond2_1314	chr10	78371889	78372603	+	8.11828	NA	Intergenic	Intergenic	-1926	ENSMUST00000122547.1	ENSMUSG00000084496	ENSMUST00000122547			Gm22514			misc_RNA
e11ve16_cond2_1315	chr10	78412266	78413169	+	159.525	NA	exon (ENSMUST00000219901.1, exon 1 of 6)	protein_coding-exon (ENSMUST00000219901.1, exon 1 of 6)	138	ENSMUST00000219901.1	ENSMUSG00000061032	ENSMUST00000219141			Rrp1			protein_coding
e11ve16_cond2_1316	chr10	79321582	79322512	+	100.325	NA	Intergenic	Intergenic	-34473	ENSMUST00000233223.1	ENSMUSG00000091468	ENSMUST00000170596			Vmn2r82			protein_coding
e11ve16_cond2_1317	chr10	79701373	79701762	+	4.48487	NA	Intergenic	Intergenic	2023	ENSMUST00000083286.1	ENSMUSG00000065220	ENSMUST00000083286			Gm25794			snRNA
e11ve16_cond2_1318	chr10	79853085	79855119	+	111.329	NA	promoter-TSS (ENSMUST00000057343.15)	protein_coding-promoter-TSS (ENSMUST00000057343.15)	-325	ENSMUST00000172282.7	ENSMUSG00000006498	ENSMUST00000172282			Ptbp1			protein_coding
e11ve16_cond2_1319	chr10	79936794	79937580	+	10.8755	NA	intron (ENSMUST00000105377.7, intron 3 of 8)	protein_coding-intron (ENSMUST00000019708.11, intron 3 of 8)	6763	ENSMUST00000131118.1	ENSMUSG00000019564	ENSMUST00000105376			Arid3a			protein_coding
e11ve16_cond2_1320	chr10	79986855	79987075	+	3.36752	NA	Intergenic	Intergenic	1459	ENSMUST00000179260.1	ENSMUSG00000095615	ENSMUST00000179260			Gm26243			snRNA
e11ve16_cond2_1321	chr10	80075145	80075484	+	6.82995	NA	promoter-TSS (ENSMUST00000218310.1)	protein_coding-promoter-TSS (ENSMUST00000218310.1)	86	ENSMUST00000218310.1	ENSMUSG00000035673	ENSMUST00000218630			Sbno2			protein_coding
e11ve16_cond2_1322	chr10	80158745	80160679	+	131.05	NA	Intergenic	Intergenic	-6273	ENSMUST00000154726.7	ENSMUSG00000045193	ENSMUST00000140774			Cirbp			protein_coding
e11ve16_cond2_1323	chr10	80248817	80249737	+	64.4737	NA	promoter-TSS (ENSMUST00000020361.6)	protein_coding-promoter-TSS (ENSMUST00000020361.6)	156	ENSMUST00000105364.7	ENSMUSG00000020153	ENSMUST00000157063			Ndufs7			protein_coding
e11ve16_cond2_1324	chr10	80281791	80283554	+	27.0641	NA	promoter-TSS (ENSMUST00000151619.1)	protein_coding-promoter-TSS (ENSMUST00000151619.1)	-195	ENSMUST00000151619.1	ENSMUSG00000069565	ENSMUST00000105361			Dazap1			protein_coding
e11ve16_cond2_1325	chr10	80398817	80400179	+	327.861	NA	promoter-TSS (ENSMUST00000092295.9)	protein_coding-promoter-TSS (ENSMUST00000092295.9)	52	ENSMUST00000105349.7	ENSMUSG00000035478	ENSMUST00000105348			Mbd3			protein_coding
e11ve16_cond2_1326	chr10	80621987	80623221	+	187.134	NA	promoter-TSS (ENSMUST00000079773.13)	protein_coding-promoter-TSS (ENSMUST00000079773.13)	-234	ENSMUST00000079773.13	ENSMUSG00000003345	ENSMUST00000219814			Csnk1g2			protein_coding
e11ve16_cond2_1327	chr10	80664567	80664950	+	4.4115	NA	TTS (ENSMUST00000003433.10)	protein_coding-TTS (ENSMUST00000003433.10)	7218	ENSMUST00000003433.10	ENSMUSG00000020190	ENSMUST00000199949			Mknk2			protein_coding
e11ve16_cond2_1328	chr10	80676107	80677230	+	89.1059	NA	promoter-TSS (ENSMUST00000200082.4)	protein_coding-promoter-TSS (ENSMUST00000200082.4)	-375	ENSMUST00000200082.4	ENSMUSG00000020190	ENSMUST00000199949			Mknk2			protein_coding
e11ve16_cond2_1329	chr10	80695438	80695677	+	3.82618	NA	intron (ENSMUST00000003438.10, intron 1 of 3)	protein_coding-intron (ENSMUST00000003438.10, intron 1 of 3)	-1821	ENSMUST00000220138.1	ENSMUSG00000003348	ENSMUST00000218090			Mob3a			protein_coding
e11ve16_cond2_1330	chr10	80701655	80702934	+	410.543	NA	promoter-TSS (ENSMUST00000003438.10)	protein_coding-promoter-TSS (ENSMUST00000003438.10)	-13	ENSMUST00000217742.1	ENSMUSG00000055862	ENSMUST00000218330			Izumo4			protein_coding
e11ve16_cond2_1331	chr10	80751462	80752328	+	7.89969	NA	Intergenic	Intergenic	-3311	ENSMUST00000105336.8	ENSMUSG00000061589	ENSMUST00000147579			Dot1l			protein_coding
e11ve16_cond2_1332	chr10	80797841	80798969	+	68.085	NA	promoter-TSS (ENSMUST00000147440.1)	protein_coding-promoter-TSS (ENSMUST00000147440.1)	54	ENSMUST00000218209.1	ENSMUSG00000035278	ENSMUST00000219767			Plekhj1			protein_coding
e11ve16_cond2_1333	chr10	80900236	80901304	+	163.842	NA	promoter-TSS (ENSMUST00000218149.1)	protein_coding-promoter-TSS (ENSMUST00000218149.1)	12	ENSMUST00000218149.1	ENSMUSG00000020219	ENSMUST00000218481			Timm13			protein_coding
e11ve16_cond2_1334	chr10	80937598	80938143	+	6.65056	NA	Intergenic	Intergenic	7058	ENSMUST00000219449.1	ENSMUSG00000015312	ENSMUST00000220246			Gadd45b			protein_coding
e11ve16_cond2_1335	chr10	80985974	80986217	+	3.5983	NA	intron (ENSMUST00000126317.1, intron 2 of 4)	protein_coding-intron (ENSMUST00000126317.1, intron 2 of 4)	12095	ENSMUST00000118465.7	ENSMUSG00000048240	ENSMUST00000126317			Gng7			protein_coding
e11ve16_cond2_1336	chr10	81182558	81183403	+	201.595	NA	promoter-TSS (ENSMUST00000047665.6)	protein_coding-promoter-TSS (ENSMUST00000047665.6)	-25	ENSMUST00000178422.8	ENSMUSG00000034974	ENSMUST00000219850			Dapk3			protein_coding
e11ve16_cond2_1337	chr10	81320149	81321452	+	104.121	NA	promoter-TSS (ENSMUST00000050867.7)	protein_coding-promoter-TSS (ENSMUST00000050867.7)	-303	ENSMUST00000050867.7	ENSMUSG00000034889	ENSMUST00000218120			Cactin			protein_coding
e11ve16_cond2_1338	chr10	81384057	81384953	+	55.8569	NA	promoter-TSS (ENSMUST00000072751.12)	protein_coding-promoter-TSS (ENSMUST00000072751.12)	38	ENSMUST00000145416.1	ENSMUSG00000078440	ENSMUST00000142346			Dohh			protein_coding
e11ve16_cond2_1339	chr10	81464749	81465207	+	3.40463	NA	intron (ENSMUST00000118763.7, intron 9 of 11)	protein_coding-intron (ENSMUST00000118763.7, intron 9 of 11)	3819	ENSMUST00000156926.1	ENSMUSG00000084849	ENSMUST00000156926			Gm16105			lncRNA
e11ve16_cond2_1340	chr10	81496501	81496841	+	7.58948	NA	promoter-TSS (ENSMUST00000020463.13)	protein_coding-promoter-TSS (ENSMUST00000020463.13)	-279	ENSMUST00000020463.13	ENSMUSG00000020238	ENSMUST00000124437			Ncln			protein_coding
e11ve16_cond2_1341	chr10	81704674	81705350	+	156.643	NA	intron (ENSMUST00000200889.3, intron 1 of 3)	protein_coding-intron (ENSMUST00000200889.3, intron 1 of 3)	134	ENSMUST00000201819.3	ENSMUSG00000096795	ENSMUST00000201819			Zfp433			protein_coding
e11ve16_cond2_1342	chr10	82127684	82127953	+	3.67818	NA	promoter-TSS (ENSMUST00000201286.3)	protein_coding-promoter-TSS (ENSMUST00000201286.3)	-195	ENSMUST00000201286.3	ENSMUSG00000078435	ENSMUST00000201286			AU041133			protein_coding
e11ve16_cond2_1343	chr10	83042693	83043339	+	6.0367	NA	intron (ENSMUST00000040110.7, intron 1 of 2)	protein_coding-intron (ENSMUST00000040110.7, intron 1 of 2)	-11321	ENSMUST00000218071.1	ENSMUSG00000112084	ENSMUST00000218071			Gm10773			TEC
e11ve16_cond2_1344	chr10	83897485	83897991	+	4.71864	NA	Intergenic	Intergenic	-4114	ENSMUST00000217741.1	ENSMUSG00000112133	ENSMUST00000217741			Gm47247			processed_pseudogene
e11ve16_cond2_1345	chr10	83927456	83927669	+	5.09476	NA	Intergenic	Intergenic	25710	ENSMUST00000217741.1	ENSMUSG00000112133	ENSMUST00000217741			Gm47247			processed_pseudogene
e11ve16_cond2_1346	chr10	84396036	84396246	+	4.07922	NA	intron (ENSMUST00000020220.14, intron 2 of 6)	protein_coding-intron (ENSMUST00000020220.14, intron 2 of 6)	-3753	ENSMUST00000129355.1	ENSMUSG00000020032	ENSMUST00000129355			Nuak1			protein_coding
e11ve16_cond2_1347	chr10	84562811	84563098	+	7.24286	NA	Intergenic	Intergenic	-9616	ENSMUST00000181466.1	ENSMUSG00000097076	ENSMUST00000181466			Platr7			lncRNA
e11ve16_cond2_1348	chr10	84576082	84576546	+	4.09208	NA	promoter-TSS (ENSMUST00000020223.7)	protein_coding-promoter-TSS (ENSMUST00000020223.7)	-312	ENSMUST00000020223.7	ENSMUSG00000020034	ENSMUST00000160057			Tcp11l2			protein_coding
e11ve16_cond2_1349	chr10	84610822	84611116	+	5.36484	NA	intron (ENSMUST00000020223.7, intron 9 of 9)	protein_coding-intron (ENSMUST00000020223.7, intron 9 of 9)	-3750	ENSMUST00000158471.1	ENSMUSG00000089096	ENSMUST00000158471			Gm25657			snRNA
e11ve16_cond2_1350	chr10	84646141	84647008	+	6.11667	NA	intron (ENSMUST00000077175.6, intron 9 of 27)	protein_coding-intron (ENSMUST00000077175.6, intron 9 of 27)	7478	ENSMUST00000213543.1	ENSMUSG00000034453	ENSMUST00000077175			Polr3b			protein_coding
e11ve16_cond2_1351	chr10	84712148	84713299	+	8.31759	NA	intron (ENSMUST00000077175.6, intron 23 of 27)	protein_coding-intron (ENSMUST00000077175.6, intron 23 of 27)	-43339	ENSMUST00000060397.12	ENSMUSG00000020037	ENSMUST00000165868			Rfx4			protein_coding
e11ve16_cond2_1352	chr10	84976751	84977137	+	5.04925	NA	intron (ENSMUST00000095385.4, intron 6 of 8)	protein_coding-intron (ENSMUST00000038523.14, intron 6 of 9)	-31772	ENSMUST00000214820.1	ENSMUSG00000035620	ENSMUST00000214820			Ric8b			protein_coding
e11ve16_cond2_1353	chr10	85694512	85695009	+	12.8257	NA	Intergenic	Intergenic	-12920	ENSMUST00000217622.1	ENSMUSG00000111435	ENSMUST00000217622			Gm47358			lncRNA
e11ve16_cond2_1354	chr10	85954250	85954648	+	6.20094	NA	promoter-TSS (ENSMUST00000218274.1)	processed_pseudogene-promoter-TSS (ENSMUST00000218274.1)	-511	ENSMUST00000218274.1	ENSMUSG00000112613	ENSMUST00000218274			Gm48175			processed_pseudogene
e11ve16_cond2_1355	chr10	85972884	85973179	+	8.13905	NA	intron (ENSMUST00000061699.11, intron 12 of 15)	protein_coding-intron (ENSMUST00000061699.11, intron 12 of 15)	-15208	ENSMUST00000001834.3	ENSMUSG00000001783	ENSMUST00000001834			Rtcb			protein_coding
e11ve16_cond2_1356	chr10	86258550	86259568	+	8.23242	NA	intron (ENSMUST00000145864.7, intron 6 of 8)	protein_coding-intron (ENSMUST00000120638.7, intron 6 of 13)	-41313	ENSMUST00000020234.13	ENSMUSG00000020044	ENSMUST00000132307			Timp3			protein_coding
e11ve16_cond2_1357	chr10	86290032	86290786	+	10.2398	NA	intron (ENSMUST00000145864.7, intron 6 of 8)	protein_coding-intron (ENSMUST00000120638.7, intron 6 of 13)	-9963	ENSMUST00000020234.13	ENSMUSG00000020044	ENSMUST00000132307			Timp3			protein_coding
e11ve16_cond2_1358	chr10	86302819	86303284	+	6.76274	NA	exon (ENSMUST00000132307.1, exon 1 of 3)	protein_coding-exon (ENSMUST00000132307.1, exon 1 of 3)	197	ENSMUST00000132307.1	ENSMUSG00000020044	ENSMUST00000132307			Timp3			protein_coding
e11ve16_cond2_1359	chr10	86310476	86311025	+	7.6877	NA	intron (ENSMUST00000132307.1, intron 1 of 2)	protein_coding-intron (ENSMUST00000020234.13, intron 1 of 4)	7896	ENSMUST00000132307.1	ENSMUSG00000020044	ENSMUST00000132307			Timp3			protein_coding
e11ve16_cond2_1360	chr10	86328582	86329154	+	12.5569	NA	intron (ENSMUST00000132307.1, intron 1 of 2)	protein_coding-intron (ENSMUST00000020234.13, intron 1 of 4)	26014	ENSMUST00000132307.1	ENSMUSG00000020044	ENSMUST00000132307			Timp3			protein_coding
e11ve16_cond2_1361	chr10	86339218	86340145	+	9.14216	NA	intron (ENSMUST00000020234.13, intron 2 of 4)	protein_coding-intron (ENSMUST00000020234.13, intron 2 of 4)	36827	ENSMUST00000132307.1	ENSMUSG00000020044	ENSMUST00000132307			Timp3			protein_coding
e11ve16_cond2_1362	chr10	86344553	86345010	+	41.2334	NA	TTS (ENSMUST00000132307.1)	protein_coding-TTS (ENSMUST00000132307.1)	41927	ENSMUST00000132307.1	ENSMUSG00000020044	ENSMUST00000132307			Timp3			protein_coding
e11ve16_cond2_1363	chr10	86459490	86460171	+	39.127	NA	intron (ENSMUST00000139197.1, intron 3 of 6)	protein_coding-intron (ENSMUST00000120638.7, intron 2 of 13)	32067	ENSMUST00000123783.7	ENSMUSG00000059602	ENSMUST00000120638			Syn3			protein_coding
e11ve16_cond2_1364	chr10	86498285	86498871	+	5.45968	NA	intron (ENSMUST00000139197.1, intron 1 of 6)	protein_coding-intron (ENSMUST00000120638.7, intron 1 of 13)	278	ENSMUST00000120638.7	ENSMUSG00000059602	ENSMUST00000120638			Syn3			protein_coding
e11ve16_cond2_1365	chr10	86705027	86706579	+	386.445	NA	promoter-TSS (ENSMUST00000020238.13)	protein_coding-promoter-TSS (ENSMUST00000020238.13)	-8	ENSMUST00000075632.13	ENSMUSG00000044937	ENSMUST00000075632			Ttc41			protein_coding
e11ve16_cond2_1366	chr10	86778265	86779096	+	10.2542	NA	promoter-TSS (ENSMUST00000099396.2)	protein_coding-promoter-TSS (ENSMUST00000099396.2)	-325	ENSMUST00000099396.2	ENSMUSG00000054027	ENSMUST00000218792			Nt5dc3			protein_coding
e11ve16_cond2_1367	chr10	86825512	86826562	+	40.6015	NA	intron (ENSMUST00000218802.1, intron 12 of 13)	protein_coding-intron (ENSMUST00000099396.2, intron 12 of 13)	934	ENSMUST00000218792.1	ENSMUSG00000054027	ENSMUST00000218792			Nt5dc3			protein_coding
e11ve16_cond2_1368	chr10	86836618	86837350	+	14.8747	NA	exon (ENSMUST00000099396.2, exon 14 of 14)	protein_coding-exon (ENSMUST00000099396.2, exon 14 of 14)	-2110	ENSMUST00000159445.1	ENSMUSG00000089959	ENSMUST00000159445			Gm16268			lncRNA
e11ve16_cond2_1369	chr10	88334796	88335962	+	9.33019	NA	intron (ENSMUST00000156097.1, intron 4 of 6)	protein_coding-intron (ENSMUST00000020249.1, intron 4 of 6)	21617	ENSMUST00000156097.1	ENSMUSG00000020057	ENSMUST00000020249			Dram1			protein_coding
e11ve16_cond2_1370	chr10	88341595	88342011	+	6.1169	NA	intron (ENSMUST00000156097.1, intron 2 of 6)	protein_coding-intron (ENSMUST00000020249.1, intron 2 of 6)	15193	ENSMUST00000156097.1	ENSMUSG00000020057	ENSMUST00000020249			Dram1			protein_coding
e11ve16_cond2_1371	chr10	88356911	88357513	+	7.52339	NA	promoter-TSS (ENSMUST00000020249.1)	protein_coding-promoter-TSS (ENSMUST00000020249.1)	-137	ENSMUST00000020249.1	ENSMUSG00000020057	ENSMUST00000020249			Dram1			protein_coding
e11ve16_cond2_1372	chr10	88380546	88380916	+	4.20545	NA	intron (ENSMUST00000151273.7, intron 1 of 19)	protein_coding-intron (ENSMUST00000020251.9, intron 1 of 20)	1505	ENSMUST00000020251.9	ENSMUSG00000035311	ENSMUST00000141343			Gnptab			protein_coding
e11ve16_cond2_1373	chr10	88385859	88386487	+	9.30249	NA	intron (ENSMUST00000151273.7, intron 1 of 19)	protein_coding-intron (ENSMUST00000020251.9, intron 1 of 20)	6947	ENSMUST00000020251.9	ENSMUSG00000035311	ENSMUST00000141343			Gnptab			protein_coding
e11ve16_cond2_1374	chr10	88389903	88390129	+	7.06222	NA	intron (ENSMUST00000151273.7, intron 1 of 19)	protein_coding-intron (ENSMUST00000020251.9, intron 1 of 20)	10790	ENSMUST00000020251.9	ENSMUSG00000035311	ENSMUST00000141343			Gnptab			protein_coding
e11ve16_cond2_1375	chr10	88504029	88504700	+	11.6028	NA	promoter-TSS (ENSMUST00000020253.14)	protein_coding-promoter-TSS (ENSMUST00000020253.14)	-291	ENSMUST00000117440.7	ENSMUSG00000060002	ENSMUST00000143108			Chpt1			protein_coding
e11ve16_cond2_1376	chr10	88622663	88622937	+	5.66249	NA	Intergenic	Intergenic	-17648	ENSMUST00000121629.7	ENSMUSG00000020061	ENSMUST00000148205			Mybpc1			protein_coding
e11ve16_cond2_1377	chr10	88793767	88793973	+	9.3531	NA	intron (ENSMUST00000004470.8, intron 22 of 61)	protein_coding-intron (ENSMUST00000004470.8, intron 22 of 61)	-11204	ENSMUST00000219662.1	ENSMUSG00000004356	ENSMUST00000218990			Utp20			protein_coding
e11ve16_cond2_1378	chr10	89526966	89527430	+	6.23291	NA	intron (ENSMUST00000105297.1, intron 1 of 9)	protein_coding-intron (ENSMUST00000105297.1, intron 1 of 9)	6387	ENSMUST00000105297.1	ENSMUSG00000047638	ENSMUST00000105297			Nr1h4			protein_coding
e11ve16_cond2_1379	chr10	89686037	89686398	+	5.25385	NA	promoter-TSS (ENSMUST00000092227.11)	protein_coding-promoter-TSS (ENSMUST00000092227.11)	46	ENSMUST00000174429.1	ENSMUSG00000069539	ENSMUST00000174492			Scyl2			protein_coding
e11ve16_cond2_1380	chr10	89750843	89751707	+	11.4724	NA	intron (ENSMUST00000220375.1, intron 1 of 11)	protein_coding-intron (ENSMUST00000020112.6, intron 1 of 20)	6037	ENSMUST00000220375.1	ENSMUSG00000019951	ENSMUST00000218607			Uhrf1bp1l			protein_coding
e11ve16_cond2_1381	chr10	89768598	89769364	+	4.57021	NA	intron (ENSMUST00000219712.1, intron 2 of 6)	protein_coding-intron (ENSMUST00000020112.6, intron 1 of 20)	-18219	ENSMUST00000218776.1	ENSMUSG00000019951	ENSMUST00000218607			Uhrf1bp1l			protein_coding
e11ve16_cond2_1382	chr10	91181189	91182528	+	74.272	NA	promoter-TSS (ENSMUST00000213270.1)	protein_coding-promoter-TSS (ENSMUST00000213270.1)	-543	ENSMUST00000216402.1	ENSMUSG00000019961	ENSMUST00000213262			Tmpo			protein_coding
e11ve16_cond2_1383	chr10	91236991	91237614	+	9.99545	NA	Intergenic	Intergenic	9116	ENSMUST00000217534.1	ENSMUSG00000110870	ENSMUST00000217534			Gm47081			processed_pseudogene
e11ve16_cond2_1384	chr10	91240937	91241949	+	33.6454	NA	Intergenic	Intergenic	13257	ENSMUST00000217534.1	ENSMUSG00000110870	ENSMUST00000217534			Gm47081			processed_pseudogene
e11ve16_cond2_1385	chr10	91377881	91378108	+	6.69624	NA	Intergenic	Intergenic	-45360	ENSMUST00000215290.1	ENSMUSG00000111591	ENSMUST00000215290			Gm47083			processed_pseudogene
e11ve16_cond2_1386	chr10	91594417	91595383	+	12.7731	NA	Intergenic	Intergenic	45990	ENSMUST00000216093.1	ENSMUSG00000111782	ENSMUST00000216093			Gm47091			processed_pseudogene
e11ve16_cond2_1387	chr10	91979405	91980436	+	6.33395	NA	Intergenic	Intergenic	91091	ENSMUST00000217529.1	ENSMUSG00000111657	ENSMUST00000217529			Gm31592			lncRNA
e11ve16_cond2_1388	chr10	91988323	91988527	+	4.11557	NA	Intergenic	Intergenic	83285	ENSMUST00000218255.1	ENSMUSG00000112117	ENSMUST00000219444			Rmst			lncRNA
e11ve16_cond2_1389	chr10	92072979	92073618	+	4.59909	NA	intron (ENSMUST00000220192.1, intron 2 of 2)	lncRNA-intron (ENSMUST00000218060.1, intron 4 of 4)	-1113	ENSMUST00000083590.1	ENSMUSG00000065524	ENSMUST00000083590			Mir135a-2			miRNA
e11ve16_cond2_1390	chr10	92080145	92080623	+	3.53691	NA	intron (ENSMUST00000220192.1, intron 1 of 2)	lncRNA-intron (ENSMUST00000218060.1, intron 2 of 4)	-4732	ENSMUST00000184822.1	ENSMUSG00000099136	ENSMUST00000184822			Gm27608			misc_RNA
e11ve16_cond2_1391	chr10	92165579	92166629	+	7.37972	NA	promoter-TSS (ENSMUST00000218314.1)	lncRNA-promoter-TSS (ENSMUST00000218314.1)	-934	ENSMUST00000218314.1	ENSMUSG00000112117	ENSMUST00000219444			Rmst			lncRNA
e11ve16_cond2_1392	chr10	92210524	92210750	+	6.65023	NA	intron (ENSMUST00000182870.1, intron 7 of 8)	lncRNA-intron (ENSMUST00000182870.1, intron 7 of 8)	12837	ENSMUST00000215367.1	ENSMUSG00000111104	ENSMUST00000215367			Gm8512			processed_pseudogene
e11ve16_cond2_1393	chr10	92722301	92722684	+	6.8102	NA	promoter-TSS (ENSMUST00000020163.6)	protein_coding-promoter-TSS (ENSMUST00000020163.6)	-72	ENSMUST00000020163.6	ENSMUSG00000019988	ENSMUST00000215970			Nedd1			protein_coding
e11ve16_cond2_1394	chr10	92790399	92791050	+	11.0755	NA	intron (ENSMUST00000212902.1, intron 67 of 67)	protein_coding-intron (ENSMUST00000168110.7, intron 66 of 66)	45622	ENSMUST00000163209.1	ENSMUSG00000020014	ENSMUST00000163209			Cfap54			protein_coding
e11ve16_cond2_1395	chr10	93050124	93050372	+	4.91608	NA	intron (ENSMUST00000212902.1, intron 5 of 67)	protein_coding-intron (ENSMUST00000020200.13, intron 5 of 17)	-15427	ENSMUST00000170065.7	ENSMUSG00000020014	ENSMUST00000163209			Cfap54			protein_coding
e11ve16_cond2_1396	chr10	93145007	93145312	+	5.68376	NA	Intergenic	Intergenic	-15716	ENSMUST00000215495.1	ENSMUSG00000020015	ENSMUST00000215286			Cdk17			protein_coding
e11ve16_cond2_1397	chr10	93347632	93348291	+	7.57507	NA	intron (ENSMUST00000212186.2, intron 1 of 2)	lncRNA-intron (ENSMUST00000212186.2, intron 1 of 2)	12568	ENSMUST00000212186.2	ENSMUSG00000110647	ENSMUST00000212186			Gm17745			lncRNA
e11ve16_cond2_1398	chr10	93425485	93425936	+	7.83088	NA	Intergenic	Intergenic	-7397	ENSMUST00000183565.1	ENSMUSG00000098679	ENSMUST00000183565			Mir7688			miRNA
e11ve16_cond2_1399	chr10	93452896	93454102	+	126.176	NA	promoter-TSS (ENSMUST00000016033.8)	protein_coding-promoter-TSS (ENSMUST00000016033.8)	48	ENSMUST00000216146.1	ENSMUSG00000015889	ENSMUST00000215419			Lta4h			protein_coding
e11ve16_cond2_1400	chr10	93918495	93918977	+	6.33469	NA	promoter-TSS (ENSMUST00000225546.1)	unitary_pseudogene-promoter-TSS (ENSMUST00000225546.1)	-354	ENSMUST00000225546.1	ENSMUSG00000114757	ENSMUST00000225546			Gm48126			unitary_pseudogene
e11ve16_cond2_1401	chr10	94380779	94381218	+	6.66402	NA	intron (ENSMUST00000147869.1, intron 1 of 1)	protein_coding-intron (ENSMUST00000132743.2, intron 1 of 2)	-27893	ENSMUST00000155180.1	ENSMUSG00000085409	ENSMUST00000155180			Gm16155			lncRNA
e11ve16_cond2_1402	chr10	94829195	94830187	+	18.956	NA	promoter-TSS (ENSMUST00000218839.1)	protein_coding-promoter-TSS (ENSMUST00000218839.1)	-145	ENSMUST00000218839.1	ENSMUSG00000074785	ENSMUST00000180514			Plxnc1			protein_coding
e11ve16_cond2_1403	chr10	95361250	95361729	+	6.35305	NA	promoter-TSS (ENSMUST00000219492.1)	lncRNA-promoter-TSS (ENSMUST00000219492.1)	-109	ENSMUST00000219492.1	ENSMUSG00000100550	ENSMUST00000219492			2310039L15Rik			lncRNA
e11ve16_cond2_1404	chr10	95385597	95386418	+	19.2135	NA	exon (ENSMUST00000139210.7, exon 5 of 5)	protein_coding-exon (ENSMUST00000139210.7, exon 5 of 5)	6960	ENSMUST00000130784.7	ENSMUSG00000020027	ENSMUST00000119917			Socs2			protein_coding
e11ve16_cond2_1405	chr10	95526659	95527318	+	8.15486	NA	intron (ENSMUST00000220428.1, intron 1 of 2)	protein_coding-intron (ENSMUST00000220428.1, intron 1 of 2)	11334	ENSMUST00000220428.1	ENSMUSG00000074781	ENSMUST00000219381			Ube2n			protein_coding
e11ve16_cond2_1406	chr10	95773486	95773942	+	7.77931	NA	intron (ENSMUST00000187483.6, intron 2 of 5)	lncRNA-intron (ENSMUST00000187483.6, intron 2 of 5)	-5203	ENSMUST00000185499.1	ENSMUSG00000101517	ENSMUST00000187483			4732465J04Rik			lncRNA
e11ve16_cond2_1407	chr10	95862590	95863048	+	5.43738	NA	Intergenic	Intergenic	7980	ENSMUST00000218412.1	ENSMUSG00000111992	ENSMUST00000218412			Gm47724			processed_pseudogene
e11ve16_cond2_1408	chr10	96230218	96230551	+	9.37556	NA	intron (ENSMUST00000219638.1, intron 2 of 5)	lncRNA-intron (ENSMUST00000218720.1, intron 1 of 2)	4177	ENSMUST00000218720.1	ENSMUSG00000112762	ENSMUST00000218720			4930459C07Rik			lncRNA
e11ve16_cond2_1409	chr10	96265022	96265329	+	4.36508	NA	Intergenic	Intergenic	38968	ENSMUST00000218720.1	ENSMUSG00000112762	ENSMUST00000218720			4930459C07Rik			lncRNA
e11ve16_cond2_1410	chr10	96338075	96338332	+	4.36456	NA	intron (ENSMUST00000218388.1, intron 3 of 4)	lncRNA-intron (ENSMUST00000218388.1, intron 3 of 4)	7621	ENSMUST00000218388.1	ENSMUSG00000112749	ENSMUST00000218388			Gm48428			lncRNA
e11ve16_cond2_1411	chr10	96397439	96398232	+	5.44269	NA	Intergenic	Intergenic	11203	ENSMUST00000179683.2	ENSMUSG00000094249	ENSMUST00000179683			Gm20091			processed_pseudogene
e11ve16_cond2_1412	chr10	96435352	96435626	+	6.78495	NA	Intergenic	Intergenic	-26451	ENSMUST00000179683.2	ENSMUSG00000094249	ENSMUST00000179683			Gm20091			processed_pseudogene
e11ve16_cond2_1413	chr10	96709848	96710432	+	6.66397	NA	Intergenic	Intergenic	-1667	ENSMUST00000219424.1	ENSMUSG00000112362	ENSMUST00000219424			Gm48507			processed_pseudogene
e11ve16_cond2_1414	chr10	96924632	96924855	+	3.53569	NA	intron (ENSMUST00000219918.1, intron 4 of 4)	lncRNA-intron (ENSMUST00000219918.1, intron 4 of 4)	34128	ENSMUST00000219918.1	ENSMUSG00000112488	ENSMUST00000219918			Gm33981			lncRNA
e11ve16_cond2_1415	chr10	96925048	96926018	+	5.98461	NA	intron (ENSMUST00000219918.1, intron 4 of 4)	lncRNA-intron (ENSMUST00000219918.1, intron 4 of 4)	33338	ENSMUST00000219918.1	ENSMUSG00000112488	ENSMUST00000219918			Gm33981			lncRNA
e11ve16_cond2_1416	chr10	97547502	97548374	+	6.51019	NA	Intergenic	Intergenic	-17190	ENSMUST00000038160.5	ENSMUSG00000036446	ENSMUST00000038160			Lum			protein_coding
e11ve16_cond2_1417	chr10	98291761	98292263	+	5.7381	NA	Intergenic	Intergenic	-9007	ENSMUST00000220324.1	ENSMUSG00000112457	ENSMUST00000220324			Gm48687			processed_pseudogene
e11ve16_cond2_1418	chr10	98474383	98475090	+	10.3092	NA	Intergenic	Intergenic	12137	ENSMUST00000192275.1	ENSMUSG00000102310	ENSMUST00000192275			Gm37631			TEC
e11ve16_cond2_1419	chr10	98572370	98573392	+	5.35974	NA	Intergenic	Intergenic	35399	ENSMUST00000220028.1	ENSMUSG00000112874	ENSMUST00000220028			Gm34297			lncRNA
e11ve16_cond2_1420	chr10	98590659	98591763	+	7.08206	NA	Intergenic	Intergenic	53729	ENSMUST00000220028.1	ENSMUSG00000112874	ENSMUST00000220028			Gm34297			lncRNA
e11ve16_cond2_1421	chr10	98618751	98619502	+	8.96293	NA	Intergenic	Intergenic	80584	ENSMUST00000217680.1	ENSMUSG00000112647	ENSMUST00000217680			Gm5427			lncRNA
e11ve16_cond2_1422	chr10	98720774	98720997	+	3.63613	NA	Intergenic	Intergenic	-21175	ENSMUST00000217680.1	ENSMUSG00000112647	ENSMUST00000217680			Gm5427			lncRNA
e11ve16_cond2_1423	chr10	98790305	98790613	+	4.42407	NA	Intergenic	Intergenic	-90749	ENSMUST00000217680.1	ENSMUSG00000112647	ENSMUST00000217680			Gm5427			lncRNA
e11ve16_cond2_1424	chr10	98790727	98791000	+	4.15077	NA	Intergenic	Intergenic	-91153	ENSMUST00000217680.1	ENSMUSG00000112647	ENSMUST00000217680			Gm5427			lncRNA
e11ve16_cond2_1425	chr10	99237030	99237735	+	7.40018	NA	exon (ENSMUST00000220253.1, exon 1 of 3)	lncRNA-exon (ENSMUST00000220253.1, exon 1 of 3)	234	ENSMUST00000220253.1	ENSMUSG00000112902	ENSMUST00000220253			Gm48884			lncRNA
e11ve16_cond2_1426	chr10	99244019	99244302	+	4.32082	NA	Intergenic	Intergenic	-6544	ENSMUST00000220253.1	ENSMUSG00000112902	ENSMUST00000220253			Gm48884			lncRNA
e11ve16_cond2_1427	chr10	99409604	99410004	+	4.14525	NA	intron (ENSMUST00000189035.1, intron 2 of 2)	lncRNA-intron (ENSMUST00000189035.1, intron 2 of 2)	7014	ENSMUST00000218725.1	ENSMUSG00000044633	ENSMUST00000060657			B530045E10Rik			lncRNA
e11ve16_cond2_1428	chr10	99841334	99841632	+	3.67648	NA	intron (ENSMUST00000222959.1, intron 1 of 1)	lncRNA-intron (ENSMUST00000222959.1, intron 1 of 1)	24537	ENSMUST00000219892.1	ENSMUSG00000112463	ENSMUST00000219892			Gm47579			processed_pseudogene
e11ve16_cond2_1429	chr10	99905497	99905724	+	3.59772	NA	Intergenic	Intergenic	-39590	ENSMUST00000219892.1	ENSMUSG00000112463	ENSMUST00000219892			Gm47579			processed_pseudogene
e11ve16_cond2_1430	chr10	100143034	100143517	+	5.38966	NA	promoter-TSS (ENSMUST00000103846.1)	miRNA-promoter-TSS (ENSMUST00000103846.1)	851	ENSMUST00000218902.1	ENSMUSG00000112831	ENSMUST00000218902			Gm35533			lncRNA
e11ve16_cond2_1431	chr10	100487046	100487615	+	6.66952	NA	promoter-TSS (ENSMUST00000058154.14)	protein_coding-promoter-TSS (ENSMUST00000058154.14)	-4	ENSMUST00000134477.1	ENSMUSG00000036676	ENSMUST00000130883			Tmtc3			protein_coding
e11ve16_cond2_1432	chr10	100741855	100742289	+	3.723	NA	promoter-TSS (ENSMUST00000218270.1)	lncRNA-promoter-TSS (ENSMUST00000218270.1)	-437	ENSMUST00000218270.1	ENSMUSG00000112104	ENSMUST00000218270			Gm35722			lncRNA
e11ve16_cond2_1433	chr10	102659567	102660494	+	17.2284	NA	Intergenic	Intergenic	-23235	ENSMUST00000218188.1	ENSMUSG00000112845	ENSMUST00000218188			Gm47143			lncRNA
e11ve16_cond2_1434	chr10	102857101	102857615	+	5.04591	NA	Intergenic	Intergenic	37987	ENSMUST00000219699.1	ENSMUSG00000112046	ENSMUST00000219699			Gm5175			transcribed_processed_pseudogene
e11ve16_cond2_1435	chr10	103640935	103642079	+	8.53026	NA	Intergenic	Intergenic	-59114	ENSMUST00000182615.1	ENSMUSG00000098173	ENSMUST00000182615			Gm26923			processed_pseudogene
e11ve16_cond2_1436	chr10	103820947	103821700	+	6.32182	NA	Intergenic	Intergenic	37009	ENSMUST00000218181.1	ENSMUSG00000112554	ENSMUST00000218181			Gm47224			lncRNA
e11ve16_cond2_1437	chr10	104027976	104028886	+	11.7642	NA	Intergenic	Intergenic	41438	ENSMUST00000218778.1	ENSMUSG00000112281	ENSMUST00000218778			Gm47226			lncRNA
e11ve16_cond2_1438	chr10	104196675	104197170	+	63.5274	NA	TTS (ENSMUST00000163113.2)	protein_coding-TTS (ENSMUST00000163113.2)	1525	ENSMUST00000163113.2	ENSMUSG00000090854	ENSMUST00000181036			Gm4340			protein_coding
e11ve16_cond2_1439	chr10	105225505	105226311	+	16.4447	NA	intron (ENSMUST00000061506.8, intron 11 of 11)	protein_coding-intron (ENSMUST00000061506.8, intron 11 of 11)	9026	ENSMUST00000147997.1	ENSMUSG00000036019	ENSMUST00000061506			Tmtc2			protein_coding
e11ve16_cond2_1440	chr10	105403805	105404229	+	20.8872	NA	intron (ENSMUST00000061506.8, intron 2 of 11)	protein_coding-intron (ENSMUST00000061506.8, intron 2 of 11)	-9731	ENSMUST00000219124.1	ENSMUSG00000112512	ENSMUST00000219124			Gm48203			TEC
e11ve16_cond2_1441	chr10	105510192	105510546	+	4.33681	NA	intron (ENSMUST00000061506.8, intron 1 of 11)	protein_coding-intron (ENSMUST00000061506.8, intron 1 of 11)	-1770	ENSMUST00000219490.1	ENSMUSG00000084399	ENSMUST00000118054			Gm15666			transcribed_processed_pseudogene
e11ve16_cond2_1442	chr10	105513750	105514529	+	7.9689	NA	TTS (ENSMUST00000219546.1)	TEC-TTS (ENSMUST00000219546.1)	2510	ENSMUST00000219546.1	ENSMUSG00000112900	ENSMUST00000219546			Gm48204			TEC
e11ve16_cond2_1443	chr10	105532787	105533072	+	3.65649	NA	TTS (ENSMUST00000217855.1)	TEC-TTS (ENSMUST00000217855.1)	1564	ENSMUST00000217855.1	ENSMUSG00000112571	ENSMUST00000217855			Gm48207			TEC
e11ve16_cond2_1444	chr10	105544214	105544803	+	5.65659	NA	intron (ENSMUST00000061506.8, intron 1 of 11)	protein_coding-intron (ENSMUST00000061506.8, intron 1 of 11)	-8520	ENSMUST00000139741.1	ENSMUSG00000036019	ENSMUST00000061506			Tmtc2			protein_coding
e11ve16_cond2_1445	chr10	105573987	105574569	+	6.21321	NA	promoter-TSS (ENSMUST00000145794.2)	lncRNA-promoter-TSS (ENSMUST00000145794.2)	157	ENSMUST00000061506.8	ENSMUSG00000036019	ENSMUST00000061506			Tmtc2			protein_coding
e11ve16_cond2_1446	chr10	105715660	105716203	+	4.82734	NA	Intergenic	Intergenic	88266	ENSMUST00000122596.1	ENSMUSG00000084545	ENSMUST00000122596			n-R5s80			rRNA
e11ve16_cond2_1447	chr10	105841098	105841394	+	8.86543	NA	promoter-TSS (ENSMUST00000155406.1)	protein_coding-promoter-TSS (ENSMUST00000155406.1)	-35	ENSMUST00000176830.1	ENSMUSG00000036009	ENSMUST00000176040			Mettl25			protein_coding
e11ve16_cond2_1448	chr10	106114726	106114985	+	3.54742	NA	Intergenic	Intergenic	40628	ENSMUST00000219276.1	ENSMUSG00000112034	ENSMUST00000219276			Gm48363			TEC
e11ve16_cond2_1449	chr10	106273353	106274341	+	6.58479	NA	Intergenic	Intergenic	-81077	ENSMUST00000071120.2	ENSMUSG00000056877	ENSMUST00000071120			Rps15a-ps1			processed_pseudogene
e11ve16_cond2_1450	chr10	106914212	106914978	+	5.55646	NA	intron (ENSMUST00000217854.1, intron 28 of 31)	protein_coding-intron (ENSMUST00000029404.16, intron 28 of 31)	21589	ENSMUST00000219024.1	ENSMUSG00000053825	ENSMUST00000169303			Ppfia2			protein_coding
e11ve16_cond2_1451	chr10	106950828	106951583	+	11.7558	NA	intron (ENSMUST00000165067.8, intron 12 of 15)	protein_coding-intron (ENSMUST00000165067.8, intron 12 of 15)	1908	ENSMUST00000217746.1	ENSMUSG00000112443	ENSMUST00000217746			Gm19007			processed_pseudogene
e11ve16_cond2_1452	chr10	107050468	107050951	+	6.33613	NA	intron (ENSMUST00000165067.8, intron 3 of 15)	protein_coding-intron (ENSMUST00000044668.4, intron 3 of 10)	8640	ENSMUST00000217922.1	ENSMUSG00000112849	ENSMUST00000217922			Gm18040			processed_pseudogene
e11ve16_cond2_1453	chr10	107123941	107124659	+	6.22553	NA	promoter-TSS (ENSMUST00000044668.4)	protein_coding-promoter-TSS (ENSMUST00000044668.4)	-632	ENSMUST00000044668.4	ENSMUSG00000035948	ENSMUST00000165067			Acss3			protein_coding
e11ve16_cond2_1454	chr10	107272665	107272912	+	4.84694	NA	exon (ENSMUST00000218031.1, exon 1 of 6)	protein_coding-exon (ENSMUST00000218031.1, exon 1 of 6)	394	ENSMUST00000218031.1	ENSMUSG00000019906	ENSMUST00000105280			Lin7a			protein_coding
e11ve16_cond2_1455	chr10	107542331	107543461	+	8.51042	NA	intron (ENSMUST00000050702.8, intron 36 of 44)	protein_coding-intron (ENSMUST00000050702.8, intron 36 of 44)	-48159	ENSMUST00000044210.4	ENSMUSG00000035923	ENSMUST00000044210			Myf6			protein_coding
e11ve16_cond2_1456	chr10	107698601	107699680	+	11.4552	NA	intron (ENSMUST00000050702.8, intron 9 of 44)	protein_coding-intron (ENSMUST00000050702.8, intron 9 of 44)	20887	ENSMUST00000218399.1	ENSMUSG00000035916	ENSMUST00000050702			Ptprq			protein_coding
e11ve16_cond2_1457	chr10	107990096	107991223	+	23.0176	NA	Intergenic	Intergenic	44014	ENSMUST00000219670.1	ENSMUSG00000112910	ENSMUST00000219670			Gm29685			lncRNA
e11ve16_cond2_1458	chr10	108071515	108071897	+	7.32882	NA	Intergenic	Intergenic	70726	ENSMUST00000219675.1	ENSMUSG00000112401	ENSMUST00000219675			Gm47999			processed_pseudogene
e11ve16_cond2_1459	chr10	108161782	108162258	+	4.38122	NA	promoter-TSS (ENSMUST00000070663.5)	protein_coding-promoter-TSS (ENSMUST00000070663.5)	-173	ENSMUST00000219263.1	ENSMUSG00000019907	ENSMUST00000218773			Ppp1r12a			protein_coding
e11ve16_cond2_1460	chr10	108307794	108308273	+	6.56803	NA	Intergenic	Intergenic	-24088	ENSMUST00000095313.4	ENSMUSG00000035873	ENSMUST00000095313			Pawr			protein_coding
e11ve16_cond2_1461	chr10	108332804	108333310	+	5.63769	NA	exon (ENSMUST00000095313.4, exon 2 of 7)	protein_coding-exon (ENSMUST00000095313.4, exon 2 of 7)	240	ENSMUST00000218332.1	ENSMUSG00000035873	ENSMUST00000095313			Pawr			protein_coding
e11ve16_cond2_1462	chr10	108376534	108376996	+	5.38258	NA	intron (ENSMUST00000218332.1, intron 1 of 4)	protein_coding-intron (ENSMUST00000095313.4, intron 2 of 6)	13100	ENSMUST00000083719.1	ENSMUSG00000065653	ENSMUST00000083719			Gm23105			snoRNA
e11ve16_cond2_1463	chr10	108409533	108410104	+	10.738	NA	intron (ENSMUST00000218332.1, intron 3 of 4)	protein_coding-intron (ENSMUST00000095313.4, intron 5 of 6)	-7433	ENSMUST00000217857.1	ENSMUSG00000112532	ENSMUST00000220211			Gm36283			lncRNA
e11ve16_cond2_1464	chr10	108466322	108467305	+	11.1133	NA	Intergenic	Intergenic	-15837	ENSMUST00000217917.1	ENSMUSG00000112065	ENSMUST00000217917			Gm47466			processed_pseudogene
e11ve16_cond2_1465	chr10	108489366	108489717	+	3.90379	NA	Intergenic	Intergenic	6891	ENSMUST00000217917.1	ENSMUSG00000112065	ENSMUST00000217917			Gm47466			processed_pseudogene
e11ve16_cond2_1466	chr10	109136519	109137761	+	9.80711	NA	Intergenic	Intergenic	-46865	ENSMUST00000157929.1	ENSMUSG00000088554	ENSMUST00000157929			Gm22097			misc_RNA
e11ve16_cond2_1467	chr10	109665144	109665494	+	3.7869	NA	Intergenic	Intergenic	16540	ENSMUST00000219153.1	ENSMUSG00000112260	ENSMUST00000219153			3110043J17Rik			TEC
e11ve16_cond2_1468	chr10	109764583	109765806	+	14.9919	NA	promoter-TSS (ENSMUST00000163071.1)	protein_coding-promoter-TSS (ENSMUST00000163071.1)	-354	ENSMUST00000163071.1	ENSMUSG00000020181	ENSMUST00000161223			Nav3			protein_coding
e11ve16_cond2_1469	chr10	110317227	110317597	+	5.25847	NA	intron (ENSMUST00000239301.1, intron 1 of 40)	protein_coding-intron (ENSMUST00000160159.2, intron 1 of 4)	-62096	ENSMUST00000219876.1	ENSMUSG00000112548	ENSMUST00000219876			Gm47338			TEC
e11ve16_cond2_1470	chr10	110329878	110330368	+	5.72878	NA	intron (ENSMUST00000239301.1, intron 1 of 40)	protein_coding-intron (ENSMUST00000160159.2, intron 1 of 4)	-49385	ENSMUST00000219876.1	ENSMUSG00000112548	ENSMUST00000219876			Gm47338			TEC
e11ve16_cond2_1471	chr10	110586840	110588051	+	15.5589	NA	Intergenic	Intergenic	-8821	ENSMUST00000220061.1	ENSMUSG00000112398	ENSMUST00000220061			9230102K24Rik			lncRNA
e11ve16_cond2_1472	chr10	110651035	110651769	+	4.23531	NA	Intergenic	Intergenic	-16599	ENSMUST00000218721.1	ENSMUSG00000112872	ENSMUST00000218721			Gm47058			processed_pseudogene
e11ve16_cond2_1473	chr10	110745033	110745461	+	5.58094	NA	promoter-TSS (ENSMUST00000073781.11)	protein_coding-promoter-TSS (ENSMUST00000073781.11)	-192	ENSMUST00000173294.7	ENSMUSG00000020185	ENSMUST00000173634			E2f7			protein_coding
e11ve16_cond2_1474	chr10	111164428	111164901	+	5.46107	NA	promoter-TSS (ENSMUST00000095310.2)	protein_coding-promoter-TSS (ENSMUST00000095310.2)	-88	ENSMUST00000105275.8	ENSMUSG00000020189	ENSMUST00000095310			Osbpl8			protein_coding
e11ve16_cond2_1475	chr10	111389773	111390213	+	5.48291	NA	Intergenic	Intergenic	52869	ENSMUST00000219123.1	ENSMUSG00000112246	ENSMUST00000219123			Gm40761			lncRNA
e11ve16_cond2_1476	chr10	111422624	111422829	+	7.94147	NA	Intergenic	Intergenic	-50497	ENSMUST00000065917.15	ENSMUSG00000058799	ENSMUST00000219718			Nap1l1			protein_coding
e11ve16_cond2_1477	chr10	111576049	111576530	+	8.39114	NA	Intergenic	Intergenic	17984	ENSMUST00000181547.1	ENSMUSG00000097082	ENSMUST00000181547			4933440J02Rik			lncRNA
e11ve16_cond2_1478	chr10	111594643	111594967	+	3.64157	NA	promoter-TSS (ENSMUST00000181547.1)	lncRNA-promoter-TSS (ENSMUST00000181547.1)	-532	ENSMUST00000181547.1	ENSMUSG00000097082	ENSMUST00000181547			4933440J02Rik			lncRNA
e11ve16_cond2_1479	chr10	111619762	111620070	+	7.67124	NA	Intergenic	Intergenic	20739	ENSMUST00000219137.1	ENSMUSG00000112249	ENSMUST00000219137			Gm30262			lncRNA
e11ve16_cond2_1480	chr10	111621071	111621347	+	3.31636	NA	Intergenic	Intergenic	22032	ENSMUST00000219137.1	ENSMUSG00000112249	ENSMUST00000219137			Gm30262			lncRNA
e11ve16_cond2_1481	chr10	111621915	111622226	+	3.46367	NA	Intergenic	Intergenic	22893	ENSMUST00000219137.1	ENSMUSG00000112249	ENSMUST00000219137			Gm30262			lncRNA
e11ve16_cond2_1482	chr10	111741015	111741810	+	14.9695	NA	intron (ENSMUST00000220039.1, intron 3 of 3)	lncRNA-intron (ENSMUST00000220039.1, intron 3 of 3)	16228	ENSMUST00000220039.1	ENSMUSG00000112430	ENSMUST00000220039			Gm30624			lncRNA
e11ve16_cond2_1483	chr10	111794786	111795954	+	6.93005	NA	intron (ENSMUST00000219530.1, intron 1 of 2)	lncRNA-intron (ENSMUST00000217752.1, intron 1 of 3)	4381	ENSMUST00000217752.1	ENSMUSG00000112137	ENSMUST00000217752			Gm47865			lncRNA
e11ve16_cond2_1484	chr10	111827856	111828075	+	3.5375	NA	intron (ENSMUST00000220039.1, intron 3 of 3)	lncRNA-intron (ENSMUST00000220039.1, intron 3 of 3)	1979	ENSMUST00000220048.1	ENSMUSG00000112321	ENSMUST00000220048			Gm47866			processed_pseudogene
e11ve16_cond2_1485	chr10	111936565	111937330	+	8.26425	NA	Intergenic	Intergenic	-35717	ENSMUST00000163048.7	ENSMUSG00000063334	ENSMUST00000174653			Krr1			protein_coding
e11ve16_cond2_1486	chr10	111958880	111960111	+	11.8443	NA	Intergenic	Intergenic	-13169	ENSMUST00000163048.7	ENSMUSG00000063334	ENSMUST00000174653			Krr1			protein_coding
e11ve16_cond2_1487	chr10	112356943	112357788	+	5.04374	NA	intron (ENSMUST00000218445.1, intron 1 of 4)	protein_coding-intron (ENSMUST00000092175.3, intron 2 of 4)	42025	ENSMUST00000218445.1	ENSMUSG00000035681	ENSMUST00000219301			Kcnc2			protein_coding
e11ve16_cond2_1488	chr10	112476108	112476337	+	3.89141	NA	Intergenic	Intergenic	19879	ENSMUST00000218827.1	ENSMUSG00000035681	ENSMUST00000219301			Kcnc2			protein_coding
e11ve16_cond2_1489	chr10	112882941	112883422	+	4.72308	NA	Intergenic	Intergenic	-45320	ENSMUST00000180464.1	ENSMUSG00000097185	ENSMUST00000180464			Gm26596			TEC
e11ve16_cond2_1490	chr10	112893516	112894512	+	24.6417	NA	Intergenic	Intergenic	-34487	ENSMUST00000180464.1	ENSMUSG00000097185	ENSMUST00000180464			Gm26596			TEC
e11ve16_cond2_1491	chr10	112928494	112929105	+	9.35242	NA	exon (ENSMUST00000099276.3, exon 1 of 1)	protein_coding-exon (ENSMUST00000099276.3, exon 1 of 1)	196	ENSMUST00000099276.3	ENSMUSG00000074748	ENSMUST00000099276			Atxn7l3b			protein_coding
e11ve16_cond2_1492	chr10	113356498	113356720	+	3.76592	NA	Intergenic	Intergenic	-67575	ENSMUST00000218916.1	ENSMUSG00000112767	ENSMUST00000218916			Gm47532			lncRNA
e11ve16_cond2_1493	chr10	113369492	113370273	+	9.11092	NA	Intergenic	Intergenic	-54302	ENSMUST00000218916.1	ENSMUSG00000112767	ENSMUST00000218916			Gm47532			lncRNA
e11ve16_cond2_1494	chr10	113847407	113847633	+	3.41368	NA	Intergenic	Intergenic	115771	ENSMUST00000220147.1	ENSMUSG00000112181	ENSMUST00000220147			Gm47538			processed_pseudogene
e11ve16_cond2_1495	chr10	114749705	114750118	+	10.8129	NA	intron (ENSMUST00000152702.1, intron 2 of 5)	protein_coding-intron (ENSMUST00000061632.7, intron 2 of 18)	-7836	ENSMUST00000161975.1	ENSMUSG00000089934	ENSMUST00000161975			4930473D10Rik			lncRNA
e11ve16_cond2_1496	chr10	114759422	114759756	+	5.16769	NA	intron (ENSMUST00000161975.1, intron 1 of 1)	protein_coding-intron (ENSMUST00000061632.7, intron 2 of 18)	1842	ENSMUST00000161975.1	ENSMUSG00000089934	ENSMUST00000161975			4930473D10Rik			lncRNA
e11ve16_cond2_1497	chr10	114892014	114892551	+	6.85672	NA	Intergenic	Intergenic	17275	ENSMUST00000219061.1	ENSMUSG00000111883	ENSMUST00000219061			Gm31182			lncRNA
e11ve16_cond2_1498	chr10	114950285	114950578	+	4.54435	NA	intron (ENSMUST00000218941.1, intron 3 of 3)	lncRNA-intron (ENSMUST00000218941.1, intron 3 of 3)	2500	ENSMUST00000218941.1	ENSMUSG00000112016	ENSMUST00000218941			Gm31267			lncRNA
e11ve16_cond2_1499	chr10	115241255	115241987	+	9.99394	NA	intron (ENSMUST00000020339.9, intron 1 of 16)	protein_coding-intron (ENSMUST00000020339.9, intron 1 of 16)	9632	ENSMUST00000219274.1	ENSMUSG00000020130	ENSMUST00000217843			Tbc1d15			protein_coding
e11ve16_cond2_1500	chr10	115362211	115362688	+	6.42067	NA	promoter-TSS (ENSMUST00000092170.6)	protein_coding-promoter-TSS (ENSMUST00000092170.6)	44	ENSMUST00000220336.1	ENSMUSG00000069520	ENSMUST00000092170			Tmem19			protein_coding
e11ve16_cond2_1501	chr10	115384405	115384971	+	5.04469	NA	promoter-TSS (ENSMUST00000020346.5)	protein_coding-promoter-TSS (ENSMUST00000020346.5)	-245	ENSMUST00000218989.1	ENSMUSG00000020137	ENSMUST00000020346			Thap2			protein_coding
e11ve16_cond2_1502	chr10	115462394	115462942	+	14.6533	NA	TTS (ENSMUST00000105272.7)	protein_coding-TTS (ENSMUST00000105272.7)	411	ENSMUST00000144732.1	ENSMUSG00000020140	ENSMUST00000144732			Lgr5			protein_coding
e11ve16_cond2_1503	chr10	115561106	115561575	+	4.08696	NA	intron (ENSMUST00000105272.7, intron 1 of 10)	protein_coding-intron (ENSMUST00000172806.7, intron 1 of 16)	-8646	ENSMUST00000173620.1	ENSMUSG00000092210	ENSMUST00000173620			A930009A15Rik			protein_coding
e11ve16_cond2_1504	chr10	115623531	115624179	+	7.62454	NA	Intergenic	Intergenic	-23527	ENSMUST00000219787.1	ENSMUSG00000112099	ENSMUST00000219787			Gm8960			processed_pseudogene
e11ve16_cond2_1505	chr10	115758802	115759263	+	5.05847	NA	Intergenic	Intergenic	-57800	ENSMUST00000217900.1	ENSMUSG00000034127	ENSMUST00000035563			Tspan8			protein_coding
e11ve16_cond2_1506	chr10	115805780	115806468	+	8.82772	NA	intron (ENSMUST00000220081.1, intron 4 of 4)	lncRNA-intron (ENSMUST00000220081.1, intron 4 of 4)	-10708	ENSMUST00000217900.1	ENSMUSG00000034127	ENSMUST00000035563			Tspan8			protein_coding
e11ve16_cond2_1507	chr10	115816548	115818088	+	8.30615	NA	promoter-TSS (ENSMUST00000035563.14)	protein_coding-promoter-TSS (ENSMUST00000035563.14)	34	ENSMUST00000035563.14	ENSMUSG00000034127	ENSMUST00000035563			Tspan8			protein_coding
e11ve16_cond2_1508	chr10	115875432	115876290	+	10.2038	NA	Intergenic	Intergenic	-6339	ENSMUST00000220081.1	ENSMUSG00000112513	ENSMUST00000220081			4930422I22Rik			lncRNA
e11ve16_cond2_1509	chr10	116377022	116377315	+	9.57243	NA	intron (ENSMUST00000092167.6, intron 30 of 31)	protein_coding-intron (ENSMUST00000092167.6, intron 30 of 31)	36585	ENSMUST00000083152.1	ENSMUSG00000065086	ENSMUST00000083152			Gm26495			snoRNA
e11ve16_cond2_1510	chr10	116536622	116538118	+	21.6683	NA	exon (ENSMUST00000169576.7, exon 3 of 17)	protein_coding-intron (ENSMUST00000218490.1, intron 2 of 6)	-5630	ENSMUST00000176664.1	ENSMUSG00000093404	ENSMUST00000176664			Gm25190			miRNA
e11ve16_cond2_1511	chr10	116701112	116701419	+	4.12389	NA	Intergenic	Intergenic	26674	ENSMUST00000181656.1	ENSMUSG00000097104	ENSMUST00000181656			Gm26579			lncRNA
e11ve16_cond2_1512	chr10	116721724	116722260	+	3.86634	NA	Intergenic	Intergenic	7185	ENSMUST00000185546.1	ENSMUSG00000100198	ENSMUST00000185546			1700030O20Rik			lncRNA
e11ve16_cond2_1513	chr10	116728307	116729001	+	3.70917	NA	promoter-TSS (ENSMUST00000218193.1)	lncRNA-promoter-TSS (ENSMUST00000218193.1)	523	ENSMUST00000185546.1	ENSMUSG00000100198	ENSMUST00000185546			1700030O20Rik			lncRNA
e11ve16_cond2_1514	chr10	117014116	117014715	+	8.01243	NA	intron (ENSMUST00000020378.4, intron 9 of 9)	protein_coding-intron (ENSMUST00000020378.4, intron 9 of 9)	28101	ENSMUST00000020378.4	ENSMUSG00000020169	ENSMUST00000020378			Best3			protein_coding
e11ve16_cond2_1515	chr10	117235449	117235676	+	3.6404	NA	intron (ENSMUST00000159193.7, intron 3 of 4)	protein_coding-intron (ENSMUST00000020392.4, intron 3 of 3)	3092	ENSMUST00000159193.7	ENSMUSG00000020177	ENSMUST00000020392			9530003J23Rik			protein_coding
e11ve16_cond2_1516	chr10	117320127	117320952	+	8.79932	NA	Intergenic	Intergenic	-27671	ENSMUST00000092162.6	ENSMUSG00000069515	ENSMUST00000092162			Lyz1			protein_coding
e11ve16_cond2_1517	chr10	117729379	117729755	+	5.21412	NA	Intergenic	Intergenic	15375	ENSMUST00000219482.1	ENSMUSG00000060181	ENSMUST00000079041			Slc35e3			protein_coding
e11ve16_cond2_1518	chr10	117860055	117860858	+	23.9422	NA	Intergenic	Intergenic	-4214	ENSMUST00000218113.1	ENSMUSG00000112458	ENSMUST00000218113			Gm40773			lncRNA
e11ve16_cond2_1519	chr10	117862075	117862371	+	6.73361	NA	Intergenic	Intergenic	-2447	ENSMUST00000218113.1	ENSMUSG00000112458	ENSMUST00000218113			Gm40773			lncRNA
e11ve16_cond2_1520	chr10	117864410	117865108	+	20.8117	NA	promoter-TSS (ENSMUST00000218113.1)	lncRNA-promoter-TSS (ENSMUST00000218113.1)	89	ENSMUST00000218113.1	ENSMUSG00000112458	ENSMUST00000218113			Gm40773			lncRNA
e11ve16_cond2_1521	chr10	117887024	117887286	+	6.11018	NA	Intergenic	Intergenic	-20440	ENSMUST00000217849.1	ENSMUSG00000112711	ENSMUST00000217849			Gm32552			lncRNA
e11ve16_cond2_1522	chr10	117905564	117906986	+	17.7	NA	Intergenic	Intergenic	-19184	ENSMUST00000217950.1	ENSMUSG00000112500	ENSMUST00000217950			4933411E08Rik			lncRNA
e11ve16_cond2_1523	chr10	119051699	119052275	+	9.70633	NA	Intergenic	Intergenic	-1488	ENSMUST00000220074.1	ENSMUSG00000112778	ENSMUST00000220074			Gm33677			lncRNA
e11ve16_cond2_1524	chr10	119055295	119055623	+	10.671	NA	Intergenic	Intergenic	-4960	ENSMUST00000220074.1	ENSMUSG00000112778	ENSMUST00000220074			Gm33677			lncRNA
e11ve16_cond2_1525	chr10	119142939	119143337	+	5.65082	NA	intron (ENSMUST00000217700.1, intron 1 of 5)	lncRNA-intron (ENSMUST00000217700.1, intron 1 of 5)	23247	ENSMUST00000217700.1	ENSMUSG00000112161	ENSMUST00000217700			Gm34045			lncRNA
e11ve16_cond2_1526	chr10	119159973	119160282	+	6.38316	NA	intron (ENSMUST00000217700.1, intron 1 of 5)	lncRNA-intron (ENSMUST00000217700.1, intron 1 of 5)	6258	ENSMUST00000217700.1	ENSMUSG00000112161	ENSMUST00000217700			Gm34045			lncRNA
e11ve16_cond2_1527	chr10	119239985	119240574	+	6.19916	NA	promoter-TSS (ENSMUST00000020315.12)	protein_coding-promoter-TSS (ENSMUST00000020315.12)	-224	ENSMUST00000020315.12	ENSMUSG00000020114	ENSMUST00000149155			Cand1			protein_coding
e11ve16_cond2_1528	chr10	119614923	119615750	+	5.30493	NA	intron (ENSMUST00000218599.1, intron 1 of 1)	protein_coding-intron (ENSMUST00000041962.15, intron 1 of 22)	2384	ENSMUST00000218599.1	ENSMUSG00000112555	ENSMUST00000218599			Gm47027			lncRNA
e11ve16_cond2_1529	chr10	119634482	119635025	+	4.80666	NA	intron (ENSMUST00000077871.13, intron 1 of 21)	protein_coding-intron (ENSMUST00000041962.15, intron 1 of 22)	-17033	ENSMUST00000218599.1	ENSMUSG00000112555	ENSMUST00000218599			Gm47027			lncRNA
e11ve16_cond2_1530	chr10	119646311	119646671	+	4.07927	NA	intron (ENSMUST00000077871.13, intron 1 of 21)	protein_coding-intron (ENSMUST00000041962.15, intron 1 of 22)	-7573	ENSMUST00000218068.1	ENSMUSG00000112106	ENSMUST00000218068			Gm47026			TEC
e11ve16_cond2_1531	chr10	119722051	119722421	+	4.64274	NA	intron (ENSMUST00000238454.1, intron 1 of 3)	protein_coding-intron (ENSMUST00000041962.15, intron 1 of 22)	30182	ENSMUST00000238747.1	ENSMUSG00000034813	ENSMUST00000081260			Grip1			protein_coding
e11ve16_cond2_1532	chr10	120377304	120377662	+	4.13448	NA	intron (ENSMUST00000072777.13, intron 3 of 4)	lncRNA-intron (ENSMUST00000041178.11, intron 2 of 2)	-12040	ENSMUST00000161291.1	ENSMUSG00000090191	ENSMUST00000161291			9230105E05Rik			lncRNA
e11ve16_cond2_1533	chr10	120384172	120384567	+	4.87911	NA	TTS (ENSMUST00000160091.7)	lncRNA-TTS (ENSMUST00000160091.7)	-5154	ENSMUST00000161291.1	ENSMUSG00000090191	ENSMUST00000161291			9230105E05Rik			lncRNA
e11ve16_cond2_1534	chr10	120421974	120422769	+	7.19505	NA	intron (ENSMUST00000072777.13, intron 3 of 4)	protein_coding-intron (ENSMUST00000072777.13, intron 3 of 4)	25739	ENSMUST00000103249.1	ENSMUSG00000076448	ENSMUST00000103249			Mir763			miRNA
e11ve16_cond2_1535	chr10	120428638	120429182	+	5.18184	NA	intron (ENSMUST00000072777.13, intron 3 of 4)	protein_coding-intron (ENSMUST00000072777.13, intron 3 of 4)	19200	ENSMUST00000103249.1	ENSMUSG00000076448	ENSMUST00000103249			Mir763			miRNA
e11ve16_cond2_1536	chr10	120461801	120462009	+	3.94279	NA	intron (ENSMUST00000072777.13, intron 3 of 4)	protein_coding-intron (ENSMUST00000072777.13, intron 3 of 4)	-13795	ENSMUST00000103249.1	ENSMUSG00000076448	ENSMUST00000103249			Mir763			miRNA
e11ve16_cond2_1537	chr10	120587626	120588386	+	6.069	NA	Intergenic	Intergenic	-17531	ENSMUST00000158299.1	ENSMUSG00000088924	ENSMUST00000158299			Gm24298			snoRNA
e11ve16_cond2_1538	chr10	120876349	120876881	+	7.88863	NA	intron (ENSMUST00000092143.11, intron 1 of 6)	protein_coding-intron (ENSMUST00000092143.11, intron 1 of 6)	-5463	ENSMUST00000130950.1	ENSMUSG00000051236	ENSMUST00000092143			Msrb3			protein_coding
e11ve16_cond2_1539	chr10	120914871	120915493	+	10.8352	NA	Intergenic	Intergenic	-13004	ENSMUST00000118291.1	ENSMUSG00000082936	ENSMUST00000118291			Gm16166			processed_pseudogene
e11ve16_cond2_1540	chr10	120955696	120955907	+	3.37666	NA	intron (ENSMUST00000119944.7, intron 1 of 12)	protein_coding-intron (ENSMUST00000119093.1, intron 1 of 13)	18624	ENSMUST00000175289.1	ENSMUSG00000093030	ENSMUST00000175289			Gm23632			miRNA
e11ve16_cond2_1541	chr10	121022642	121023134	+	6.14362	NA	Intergenic	Intergenic	-11072	ENSMUST00000020439.10	ENSMUSG00000020218	ENSMUST00000020439			Wif1			protein_coding
e11ve16_cond2_1542	chr10	121055665	121055990	+	7.91	NA	intron (ENSMUST00000175867.1, intron 2 of 9)	protein_coding-intron (ENSMUST00000020439.10, intron 2 of 9)	21803	ENSMUST00000175867.1	ENSMUSG00000020218	ENSMUST00000020439			Wif1			protein_coding
e11ve16_cond2_1543	chr10	121205815	121206706	+	11.87	NA	Intergenic	Intergenic	-3611	ENSMUST00000219710.1	ENSMUSG00000112846	ENSMUST00000219710			4930432O09Rik			lncRNA
e11ve16_cond2_1544	chr10	121247215	121247470	+	3.9405	NA	Intergenic	Intergenic	4340	ENSMUST00000219186.1	ENSMUSG00000112871	ENSMUST00000219186			Gm35404			lncRNA
e11ve16_cond2_1545	chr10	121318528	121318753	+	7.61773	NA	intron (ENSMUST00000219179.1, intron 2 of 5)	protein_coding-intron (ENSMUST00000219179.1, intron 2 of 5)	-7451	ENSMUST00000064107.6	ENSMUSG00000052302	ENSMUST00000218688			Tbc1d30			protein_coding
e11ve16_cond2_1546	chr10	121350850	121351350	+	3.45347	NA	TTS (ENSMUST00000219668.1)	lncRNA-TTS (ENSMUST00000219668.1)	178	ENSMUST00000219179.1	ENSMUSG00000052302	ENSMUST00000218688			Tbc1d30			protein_coding
e11ve16_cond2_1547	chr10	121439650	121439988	+	5.12869	NA	intron (ENSMUST00000220023.1, intron 1 of 1)	protein_coding-intron (ENSMUST00000026902.8, intron 1 of 4)	22394	ENSMUST00000219500.1	ENSMUSG00000025795	ENSMUST00000219500			Rassf3			protein_coding
e11ve16_cond2_1548	chr10	121795752	121796682	+	11.5679	NA	intron (ENSMUST00000081688.12, intron 18 of 21)	protein_coding-intron (ENSMUST00000020322.11, intron 18 of 21)	10887	ENSMUST00000161996.1	ENSMUSG00000020121	ENSMUST00000020322			Srgap1			protein_coding
e11ve16_cond2_1549	chr10	122096863	122097487	+	8.83499	NA	promoter-TSS (ENSMUST00000038772.12)	protein_coding-promoter-TSS (ENSMUST00000038772.12)	-19	ENSMUST00000038772.12	ENSMUSG00000034620	ENSMUST00000141057			Rxylt1			protein_coding
e11ve16_cond2_1550	chr10	122185010	122185837	+	9.78944	NA	Intergenic	Intergenic	-13727	ENSMUST00000220445.1	ENSMUSG00000112305	ENSMUST00000220445			Gm48875			processed_pseudogene
e11ve16_cond2_1551	chr10	122194929	122195341	+	4.69731	NA	Intergenic	Intergenic	-4015	ENSMUST00000220445.1	ENSMUSG00000112305	ENSMUST00000220445			Gm48875			processed_pseudogene
e11ve16_cond2_1552	chr10	122408717	122408968	+	4.1364	NA	intron (ENSMUST00000218285.1, intron 2 of 2)	lncRNA-intron (ENSMUST00000218285.1, intron 2 of 2)	21950	ENSMUST00000218971.1	ENSMUSG00000112774	ENSMUST00000218971			Gm36041			lncRNA
e11ve16_cond2_1553	chr10	122659958	122660363	+	3.78418	NA	Intergenic	Intergenic	11821	ENSMUST00000184477.1	ENSMUSG00000098522	ENSMUST00000184477			Mir6412			miRNA
e11ve16_cond2_1554	chr10	122894418	122895353	+	44.9009	NA	promoter-TSS (ENSMUST00000162969.1)	protein_coding-promoter-TSS (ENSMUST00000162969.1)	-483	ENSMUST00000162969.1	ENSMUSG00000034613	ENSMUST00000161371			Ppm1h			protein_coding
e11ve16_cond2_1555	chr10	123076127	123076431	+	6.73879	NA	promoter-TSS (ENSMUST00000037557.8)	protein_coding-promoter-TSS (ENSMUST00000037557.8)	104	ENSMUST00000219203.1	ENSMUSG00000034602	ENSMUST00000219203			Mon2			protein_coding
e11ve16_cond2_1556	chr10	123196826	123197225	+	4.21054	NA	promoter-TSS (ENSMUST00000020334.8)	protein_coding-promoter-TSS (ENSMUST00000020334.8)	-30	ENSMUST00000220377.1	ENSMUSG00000020124	ENSMUST00000220284			Usp15			protein_coding
e11ve16_cond2_1557	chr10	123521055	123522098	+	43.6445	NA	intron (ENSMUST00000238972.1, intron 2 of 5)	protein_coding-intron (ENSMUST00000050756.7, intron 2 of 5)	-62012	ENSMUST00000220109.1	ENSMUSG00000111945	ENSMUST00000220109			Gm19169			processed_pseudogene
e11ve16_cond2_1558	chr10	123580304	123580781	+	5.31273	NA	intron (ENSMUST00000238972.1, intron 2 of 5)	protein_coding-intron (ENSMUST00000050756.7, intron 2 of 5)	-3046	ENSMUST00000220109.1	ENSMUSG00000111945	ENSMUST00000220109			Gm19169			processed_pseudogene
e11ve16_cond2_1559	chr10	123682400	123682922	+	8.41698	NA	intron (ENSMUST00000218926.1, intron 2 of 5)	protein_coding-intron (ENSMUST00000050756.7, intron 3 of 5)	99073	ENSMUST00000220109.1	ENSMUSG00000111945	ENSMUST00000220109			Gm19169			processed_pseudogene
e11ve16_cond2_1560	chr10	123921318	123921780	+	6.882	NA	Intergenic	Intergenic	-29651	ENSMUST00000219335.1	ENSMUSG00000112603	ENSMUST00000219335			Gm18510			processed_pseudogene
e11ve16_cond2_1561	chr10	124119617	124120377	+	9.11588	NA	Intergenic	Intergenic	-98865	ENSMUST00000220441.1	ENSMUSG00000112250	ENSMUST00000220441			Gm47837			processed_pseudogene
e11ve16_cond2_1562	chr10	124146750	124147325	+	5.9962	NA	Intergenic	Intergenic	-71825	ENSMUST00000220441.1	ENSMUSG00000112250	ENSMUST00000220441			Gm47837			processed_pseudogene
e11ve16_cond2_1563	chr10	124221977	124223048	+	12.1256	NA	Intergenic	Intergenic	3650	ENSMUST00000220441.1	ENSMUSG00000112250	ENSMUST00000220441			Gm47837			processed_pseudogene
e11ve16_cond2_1564	chr10	124249515	124249971	+	3.82943	NA	Intergenic	Intergenic	30881	ENSMUST00000220441.1	ENSMUSG00000112250	ENSMUST00000220441			Gm47837			processed_pseudogene
e11ve16_cond2_1565	chr10	124288088	124289035	+	13.7411	NA	Intergenic	Intergenic	69699	ENSMUST00000220441.1	ENSMUSG00000112250	ENSMUST00000220441			Gm47837			processed_pseudogene
e11ve16_cond2_1566	chr10	124317011	124317231	+	3.38861	NA	Intergenic	Intergenic	98259	ENSMUST00000220441.1	ENSMUSG00000112250	ENSMUST00000220441			Gm47837			processed_pseudogene
e11ve16_cond2_1567	chr10	124706631	124707164	+	7.00457	NA	Intergenic	Intergenic	138584	ENSMUST00000217909.1	ENSMUSG00000112130	ENSMUST00000217909			Gm47839			lncRNA
e11ve16_cond2_1568	chr10	124924498	124925020	+	5.428	NA	Intergenic	Intergenic	-67267	ENSMUST00000217790.1	ENSMUSG00000112542	ENSMUST00000217790			Gm47840			TEC
e11ve16_cond2_1569	chr10	125265082	125266479	+	24.8249	NA	intron (ENSMUST00000210780.1, intron 6 of 8)	protein_coding-intron (ENSMUST00000063318.9, intron 4 of 6)	43036	ENSMUST00000105257.3	ENSMUSG00000020102	ENSMUST00000210069			Slc16a7			protein_coding
e11ve16_cond2_1570	chr10	125321597	125322449	+	13.6396	NA	intron (ENSMUST00000210069.1, intron 3 of 4)	protein_coding-intron (ENSMUST00000063318.9, intron 1 of 6)	6512	ENSMUST00000063318.9	ENSMUSG00000020102	ENSMUST00000210069			Slc16a7			protein_coding
e11ve16_cond2_1571	chr10	125362474	125363371	+	11.954	NA	intron (ENSMUST00000210780.1, intron 1 of 8)	protein_coding-intron (ENSMUST00000209246.1, intron 2 of 3)	-20743	ENSMUST00000210069.1	ENSMUSG00000020102	ENSMUST00000210069			Slc16a7			protein_coding
e11ve16_cond2_1572	chr10	125389043	125389690	+	5.18949	NA	promoter-TSS (ENSMUST00000209246.1)	protein_coding-promoter-TSS (ENSMUST00000209246.1)	2	ENSMUST00000209246.1	ENSMUSG00000020102	ENSMUST00000210069			Slc16a7			protein_coding
e11ve16_cond2_1573	chr10	125538274	125538532	+	3.22041	NA	Intergenic	Intergenic	25872	ENSMUST00000219250.1	ENSMUSG00000112100	ENSMUST00000219250			Gm9102			processed_pseudogene
e11ve16_cond2_1574	chr10	125954616	125955074	+	4.19981	NA	Intergenic	Intergenic	-11323	ENSMUST00000218363.1	ENSMUSG00000020105	ENSMUST00000217813			Lrig3			protein_coding
e11ve16_cond2_1575	chr10	125966078	125966349	+	3.56022	NA	promoter-TSS (ENSMUST00000074807.7)	protein_coding-promoter-TSS (ENSMUST00000074807.7)	-6	ENSMUST00000217813.1	ENSMUSG00000020105	ENSMUST00000217813			Lrig3			protein_coding
e11ve16_cond2_1576	chr10	126453122	126453768	+	3.8852	NA	Intergenic	Intergenic	81470	ENSMUST00000218075.1	ENSMUSG00000112482	ENSMUST00000218075			1700025K04Rik			lncRNA
e11ve16_cond2_1577	chr10	126810048	126810496	+	4.44249	NA	promoter-TSS (ENSMUST00000219394.1)	processed_pseudogene-promoter-TSS (ENSMUST00000219394.1)	28	ENSMUST00000219394.1	ENSMUSG00000112492	ENSMUST00000219394			Gm9111			processed_pseudogene
e11ve16_cond2_1578	chr10	126810622	126810881	+	3.82181	NA	promoter-TSS (ENSMUST00000219394.1)	processed_pseudogene-promoter-TSS (ENSMUST00000219394.1)	-451	ENSMUST00000219394.1	ENSMUSG00000112492	ENSMUST00000219394			Gm9111			processed_pseudogene
e11ve16_cond2_1579	chr10	126983688	126983971	+	3.67379	NA	intron (ENSMUST00000105256.9, intron 1 of 7)	protein_coding-intron (ENSMUST00000105256.9, intron 1 of 7)	4800	ENSMUST00000219917.1	ENSMUSG00000078429	ENSMUST00000217738			Ctdsp2			protein_coding
e11ve16_cond2_1580	chr10	127091077	127091655	+	5.14254	NA	exon (ENSMUST00000039259.6, exon 18 of 19)	protein_coding-exon (ENSMUST00000039259.6, exon 18 of 19)	12459	ENSMUST00000217941.1	ENSMUSG00000025422	ENSMUST00000239120			Agap2			protein_coding
e11ve16_cond2_1581	chr10	127516491	127517035	+	7.77148	NA	TTS (ENSMUST00000026470.5)	protein_coding-TTS (ENSMUST00000026470.5)	1796	ENSMUST00000218492.1	ENSMUSG00000040280	ENSMUST00000218302			Ndufa4l2			protein_coding
e11ve16_cond2_1582	chr10	127596387	127597112	+	12.413	NA	intron (ENSMUST00000124182.1, intron 1 of 1)	protein_coding-intron (ENSMUST00000049149.14, intron 6 of 88)	201	ENSMUST00000124182.1	ENSMUSG00000086499	ENSMUST00000124182			Gm16217			lncRNA
e11ve16_cond2_1583	chr10	127643441	127644061	+	4.5699	NA	intron (ENSMUST00000092074.11, intron 1 of 21)	protein_coding-intron (ENSMUST00000092074.11, intron 1 of 21)	749	ENSMUST00000120279.1	ENSMUSG00000002147	ENSMUST00000092074			Stat6			protein_coding
e11ve16_cond2_1584	chr10	127666806	127668635	+	9.45965	NA	intron (ENSMUST00000118728.7, intron 1 of 10)	protein_coding-intron (ENSMUST00000118728.7, intron 1 of 10)	554	ENSMUST00000142580.1	ENSMUSG00000040195	ENSMUST00000142580			Nemp1			protein_coding
e11ve16_cond2_1585	chr10	127881283	127881588	+	4.93283	NA	Intergenic	Intergenic	6895	ENSMUST00000130374.1	ENSMUSG00000040134	ENSMUST00000130374			Rdh7			protein_coding
e11ve16_cond2_1586	chr10	127905087	127905444	+	5.7932	NA	intron (ENSMUST00000047134.7, intron 3 of 3)	protein_coding-intron (ENSMUST00000047134.7, intron 3 of 3)	1851	ENSMUST00000149849.1	ENSMUSG00000040127	ENSMUST00000155067			Sdr9c7			protein_coding
e11ve16_cond2_1587	chr10	128344573	128345256	+	5.33316	NA	intron (ENSMUST00000005826.8, intron 1 of 10)	protein_coding-intron (ENSMUST00000005826.8, intron 1 of 10)	-4327	ENSMUST00000158688.2	ENSMUSG00000089313	ENSMUST00000158688			Gm23182			snoRNA
e11ve16_cond2_1588	chr10	128547089	128548390	+	87.5315	NA	promoter-TSS (ENSMUST00000040572.9)	protein_coding-promoter-TSS (ENSMUST00000040572.9)	4	ENSMUST00000135226.7	ENSMUSG00000039810	ENSMUST00000133458			Zc3h10			protein_coding
e11ve16_cond2_1589	chr10	128565345	128566725	+	214.774	NA	promoter-TSS (ENSMUST00000026425.12)	protein_coding-promoter-TSS (ENSMUST00000026425.12)	-48	ENSMUST00000131728.3	ENSMUSG00000025364	ENSMUST00000131728			Pa2g4			protein_coding
e11ve16_cond2_1590	chr10	128696072	128696512	+	4.05664	NA	promoter-TSS (ENSMUST00000000727.3)	protein_coding-promoter-TSS (ENSMUST00000000727.3)	-28	ENSMUST00000000727.3	ENSMUSG00000000711	ENSMUST00000000727			Rab5b			protein_coding
e11ve16_cond2_1591	chr10	128862353	128863090	+	5.87306	NA	intron (ENSMUST00000220381.1, intron 10 of 11)	protein_coding-intron (ENSMUST00000105230.3, intron 9 of 10)	28997	ENSMUST00000026408.6	ENSMUSG00000025352	ENSMUST00000026408			Gdf11			protein_coding
e11ve16_cond2_1592	chr10	128923041	128923928	+	11.7695	NA	promoter-TSS (ENSMUST00000026405.9)	protein_coding-promoter-TSS (ENSMUST00000026405.9)	40	ENSMUST00000143628.1	ENSMUSG00000090247	ENSMUST00000143628			Bloc1s1			protein_coding
e11ve16_cond2_1593	chr10	128929736	128930601	+	21.6478	NA	Intergenic	Intergenic	-3650	ENSMUST00000099112.3	ENSMUSG00000025348	ENSMUST00000218290			Itga7			protein_coding
e11ve16_cond2_1594	chr10	128938719	128938986	+	3.62056	NA	intron (ENSMUST00000099112.3, intron 1 of 24)	protein_coding-intron (ENSMUST00000099112.3, intron 1 of 24)	4796	ENSMUST00000218387.1	ENSMUSG00000025348	ENSMUST00000218290			Itga7			protein_coding
e11ve16_cond2_1595	chr10	128980652	128981470	+	6.10342	NA	Intergenic	Intergenic	-8370	ENSMUST00000091996.3	ENSMUSG00000069430	ENSMUST00000091996			Olfr9			protein_coding
e11ve16_cond2_1596	chr10	130470027	130470697	+	8.14059	NA	TTS (ENSMUST00000164227.3)	protein_coding-TTS (ENSMUST00000164227.3)	247	ENSMUST00000218030.1	ENSMUSG00000112712	ENSMUST00000218030			Gm18755			processed_pseudogene
e11ve16_cond2_1597	chr10	130541979	130542344	+	11.1603	NA	promoter-TSS (ENSMUST00000218557.1)	lncRNA-promoter-TSS (ENSMUST00000218557.1)	-186	ENSMUST00000218557.1	ENSMUSG00000112742	ENSMUST00000218557			Gm31793			lncRNA
e11ve16_cond2_1598	chr10	130547458	130547680	+	4.32804	NA	intron (ENSMUST00000218557.1, intron 1 of 2)	lncRNA-intron (ENSMUST00000218557.1, intron 1 of 2)	5222	ENSMUST00000218557.1	ENSMUSG00000112742	ENSMUST00000218557			Gm31793			lncRNA
e11ve16_cond2_1599	chr11	3123281	3124412	+	704.439	NA	Intergenic	Intergenic	-2058	ENSMUST00000145164.7	ENSMUSG00000082286	ENSMUST00000119128			Pisd-ps1			transcribed_unprocessed_pseudogene
e11ve16_cond2_1600	chr11	3127095	3127540	+	440.858	NA	intron (ENSMUST00000132408.7, intron 2 of 3)	transcribed_unprocessed_pseudogene-intron (ENSMUST00000119128.7, intron 1 of 6)	1311	ENSMUST00000119128.7	ENSMUSG00000082286	ENSMUST00000119128			Pisd-ps1			transcribed_unprocessed_pseudogene
e11ve16_cond2_1601	chr11	3128005	3128341	+	308.865	NA	promoter-TSS (ENSMUST00000152828.1)	transcribed_unprocessed_pseudogene-promoter-TSS (ENSMUST00000152828.1)	-799	ENSMUST00000152828.1	ENSMUSG00000082286	ENSMUST00000119128			Pisd-ps1			transcribed_unprocessed_pseudogene
e11ve16_cond2_1602	chr11	3132118	3132576	+	250.93	NA	exon (ENSMUST00000137633.7, exon 10 of 10)	protein_coding-exon (ENSMUST00000137633.7, exon 10 of 10)	3375	ENSMUST00000152828.1	ENSMUSG00000082286	ENSMUST00000119128			Pisd-ps1			transcribed_unprocessed_pseudogene
e11ve16_cond2_1603	chr11	3133566	3133835	+	143.675	NA	exon (ENSMUST00000144447.7, exon 3 of 4)	protein_coding-exon (ENSMUST00000144447.7, exon 3 of 4)	2307	ENSMUST00000144447.7	ENSMUSG00000023764	ENSMUST00000144778			Sfi1			protein_coding
e11ve16_cond2_1604	chr11	3141337	3142881	+	265.077	NA	promoter-TSS (ENSMUST00000131021.1)	lncRNA-promoter-TSS (ENSMUST00000131021.1)	61	ENSMUST00000131021.1	ENSMUSG00000087111	ENSMUST00000131021			Gm11399			lncRNA
e11ve16_cond2_1605	chr11	3146189	3146476	+	176.692	NA	promoter-TSS (ENSMUST00000133882.1)	protein_coding-promoter-TSS (ENSMUST00000133882.1)	24	ENSMUST00000133882.1	ENSMUSG00000023764	ENSMUST00000144778			Sfi1			protein_coding
e11ve16_cond2_1606	chr11	3153772	3153973	+	95.8097	NA	intron (ENSMUST00000144359.7, intron 7 of 24)	protein_coding-intron (ENSMUST00000138126.7, intron 9 of 21)	-2917	ENSMUST00000120853.1	ENSMUSG00000081208	ENSMUST00000120853			Gm11400			processed_pseudogene
e11ve16_cond2_1607	chr11	3161451	3162164	+	199.977	NA	intron (ENSMUST00000143442.1, intron 4 of 4)	protein_coding-intron (ENSMUST00000066391.13, intron 9 of 31)	2790	ENSMUST00000126746.8	ENSMUSG00000023764	ENSMUST00000144778			Sfi1			protein_coding
e11ve16_cond2_1608	chr11	3168979	3169272	+	150.278	NA	intron (ENSMUST00000153425.8, intron 6 of 30)	protein_coding-intron (ENSMUST00000066391.13, intron 7 of 31)	1579	ENSMUST00000156655.7	ENSMUSG00000023764	ENSMUST00000144778			Sfi1			protein_coding
e11ve16_cond2_1609	chr11	3169466	3169690	+	143.871	NA	intron (ENSMUST00000153425.8, intron 6 of 30)	protein_coding-intron (ENSMUST00000066391.13, intron 7 of 31)	1126	ENSMUST00000156655.7	ENSMUSG00000023764	ENSMUST00000144778			Sfi1			protein_coding
e11ve16_cond2_1610	chr11	3172441	3172670	+	140.796	NA	intron (ENSMUST00000138126.7, intron 6 of 21)	protein_coding-intron (ENSMUST00000066391.13, intron 6 of 31)	-1851	ENSMUST00000156655.7	ENSMUSG00000023764	ENSMUST00000144778			Sfi1			protein_coding
e11ve16_cond2_1611	chr11	3179843	3180046	+	181.536	NA	intron (ENSMUST00000140846.8, intron 1 of 29)	protein_coding-intron (ENSMUST00000066391.13, intron 4 of 31)	-2451	ENSMUST00000141422.7	ENSMUSG00000023764	ENSMUST00000144778			Sfi1			protein_coding
e11ve16_cond2_1612	chr11	3184283	3186074	+	475.996	NA	TTS (ENSMUST00000118627.1)	protein_coding-TTS (ENSMUST00000118627.1)	2177	ENSMUST00000155763.7	ENSMUSG00000023764	ENSMUST00000144778			Sfi1			protein_coding
e11ve16_cond2_1613	chr11	3192989	3193735	+	953.726	NA	promoter-TSS (ENSMUST00000081318.12)	protein_coding-promoter-TSS (ENSMUST00000081318.12)	45	ENSMUST00000081318.12	ENSMUSG00000023764	ENSMUST00000144778			Sfi1			protein_coding
e11ve16_cond2_1614	chr11	3196301	3196660	+	456.696	NA	TTS (ENSMUST00000119333.1)	processed_pseudogene-TTS (ENSMUST00000119333.1)	344	ENSMUST00000119333.1	ENSMUSG00000082658	ENSMUST00000119333			Fau-ps2			processed_pseudogene
e11ve16_cond2_1615	chr11	3302590	3303094	+	10.6058	NA	intron (ENSMUST00000123983.7, intron 4 of 4)	protein_coding-intron (ENSMUST00000057089.12, intron 3 of 3)	4558	ENSMUST00000154319.1	ENSMUSG00000020453	ENSMUST00000093402			Patz1			protein_coding
e11ve16_cond2_1616	chr11	3390868	3391158	+	3.62832	NA	intron (ENSMUST00000125832.7, intron 1 of 4)	protein_coding-intron (ENSMUST00000101638.3, intron 2 of 15)	18161	ENSMUST00000101638.3	ENSMUSG00000020451	ENSMUST00000142926			Limk2			protein_coding
e11ve16_cond2_1617	chr11	4031293	4031961	+	7.97654	NA	promoter-TSS (ENSMUST00000019512.7)	protein_coding-promoter-TSS (ENSMUST00000019512.7)	14	ENSMUST00000126423.7	ENSMUSG00000019368	ENSMUST00000131171			Sec14l4			protein_coding
e11ve16_cond2_1618	chr11	4103696	4103954	+	3.55227	NA	intron (ENSMUST00000132421.7, intron 3 of 5)	protein_coding-intron (ENSMUST00000003681.7, intron 9 of 11)	-3930	ENSMUST00000119801.1	ENSMUSG00000082364	ENSMUST00000119801			Gm11955			processed_pseudogene
e11ve16_cond2_1619	chr11	4486947	4487922	+	13.6569	NA	exon (ENSMUST00000040448.12, exon 16 of 18)	protein_coding-exon (ENSMUST00000040448.12, exon 16 of 18)	932	ENSMUST00000155566.7	ENSMUSG00000034354	ENSMUST00000130716			Mtmr3			protein_coding
e11ve16_cond2_1620	chr11	4603092	4603322	+	7.74868	NA	Intergenic	Intergenic	-8344	ENSMUST00000130716.7	ENSMUSG00000034354	ENSMUST00000130716			Mtmr3			protein_coding
e11ve16_cond2_1621	chr11	4641303	4641557	+	8.62795	NA	intron (ENSMUST00000070257.13, intron 2 of 19)	protein_coding-intron (ENSMUST00000070257.13, intron 2 of 19)	3683	ENSMUST00000109930.2	ENSMUSG00000020412	ENSMUST00000070257			Ascc2			protein_coding
e11ve16_cond2_1622	chr11	4729925	4730513	+	5.30517	NA	exon (ENSMUST00000009220.4, exon 4 of 6)	protein_coding-exon (ENSMUST00000009220.4, exon 4 of 6)	1634	ENSMUST00000141970.1	ENSMUSG00000009076	ENSMUST00000009220			Zmat5			protein_coding
e11ve16_cond2_1623	chr11	5555450	5556010	+	51.7803	NA	Intergenic	Intergenic	5005	ENSMUST00000104116.1	ENSMUSG00000077304	ENSMUST00000104116			Gm22471			snoRNA
e11ve16_cond2_1624	chr11	5799607	5800327	+	11.7905	NA	exon (ENSMUST00000020769.13, exon 13 of 13)	protein_coding-exon (ENSMUST00000020769.13, exon 13 of 13)	3766	ENSMUST00000020768.3	ENSMUSG00000020475	ENSMUST00000020768			Pgam2			protein_coding
e11ve16_cond2_1625	chr11	6291788	6292084	+	6.55179	NA	promoter-TSS (ENSMUST00000081894.4)	protein_coding-promoter-TSS (ENSMUST00000081894.4)	-49	ENSMUST00000140765.7	ENSMUSG00000020456	ENSMUST00000140765			Ogdh			protein_coding
e11ve16_cond2_1626	chr11	6394068	6394686	+	8.42237	NA	promoter-TSS (ENSMUST00000102914.9)	protein_coding-promoter-TSS (ENSMUST00000102914.9)	-811	ENSMUST00000102914.9	ENSMUSG00000041164	ENSMUST00000109786			Zmiz2			protein_coding
e11ve16_cond2_1627	chr11	6404686	6405175	+	6.4325	NA	intron (ENSMUST00000102914.9, intron 18 of 18)	protein_coding-intron (ENSMUST00000012612.10, intron 19 of 19)	3300	ENSMUST00000184154.1	ENSMUSG00000098516	ENSMUST00000184154			Mir7651			miRNA
e11ve16_cond2_1628	chr11	6444140	6444585	+	3.73602	NA	promoter-TSS (ENSMUST00000093346.5)	protein_coding-promoter-TSS (ENSMUST00000093346.5)	-10	ENSMUST00000093346.5	ENSMUSG00000041126	ENSMUST00000109737			H2az2			protein_coding
e11ve16_cond2_1629	chr11	6487533	6487807	+	5.01825	NA	intron (ENSMUST00000127488.1, intron 2 of 2)	lncRNA-intron (ENSMUST00000124274.1, intron 1 of 2)	-11753	ENSMUST00000179343.2	ENSMUSG00000094483	ENSMUST00000179343			Purb			protein_coding
e11ve16_cond2_1630	chr11	6504524	6505145	+	8.13939	NA	Intergenic	Intergenic	3851	ENSMUST00000134639.1	ENSMUSG00000020437	ENSMUST00000144725			Myo1g			protein_coding
e11ve16_cond2_1631	chr11	6514856	6515327	+	4.15224	NA	exon (ENSMUST00000156878.7, exon 7 of 7)	protein_coding-exon (ENSMUST00000156878.7, exon 7 of 7)	409	ENSMUST00000131823.1	ENSMUSG00000020437	ENSMUST00000144725			Myo1g			protein_coding
e11ve16_cond2_1632	chr11	6546385	6546779	+	4.31476	NA	promoter-TSS (ENSMUST00000000388.14)	protein_coding-promoter-TSS (ENSMUST00000000388.14)	-305	ENSMUST00000000388.14	ENSMUSG00000000378	ENSMUST00000160633			Ccm2			protein_coding
e11ve16_cond2_1633	chr11	7129478	7129842	+	4.58855	NA	intron (ENSMUST00000020706.4, intron 4 of 19)	protein_coding-intron (ENSMUST00000020706.4, intron 4 of 19)	-30222	ENSMUST00000135398.1	ENSMUSG00000020431	ENSMUST00000020706			Adcy1			protein_coding
e11ve16_cond2_1634	chr11	7136517	7136822	+	4.081	NA	intron (ENSMUST00000020706.4, intron 5 of 19)	protein_coding-intron (ENSMUST00000020706.4, intron 5 of 19)	-23213	ENSMUST00000135398.1	ENSMUSG00000020431	ENSMUST00000020706			Adcy1			protein_coding
e11ve16_cond2_1635	chr11	7178919	7179546	+	7.72029	NA	TTS (ENSMUST00000020706.4)	protein_coding-TTS (ENSMUST00000020706.4)	9337	ENSMUST00000122910.2	ENSMUSG00000087512	ENSMUST00000122910			Ccdc201			protein_coding
e11ve16_cond2_1636	chr11	7226933	7227282	+	3.94518	NA	Intergenic	Intergenic	-13184	ENSMUST00000135887.2	ENSMUSG00000020427	ENSMUST00000135887			Igfbp3			protein_coding
e11ve16_cond2_1637	chr11	7227397	7227722	+	3.36752	NA	Intergenic	Intergenic	-13636	ENSMUST00000135887.2	ENSMUSG00000020427	ENSMUST00000135887			Igfbp3			protein_coding
e11ve16_cond2_1638	chr11	7473549	7474703	+	17.4568	NA	Intergenic	Intergenic	-183752	ENSMUST00000149481.1	ENSMUSG00000087637	ENSMUST00000149481			Gm11986			lncRNA
e11ve16_cond2_1639	chr11	8345008	8345391	+	5.86894	NA	Intergenic	Intergenic	38654	ENSMUST00000117240.1	ENSMUSG00000083553	ENSMUST00000117240			Gm11989			processed_pseudogene
e11ve16_cond2_1640	chr11	8445875	8446413	+	10.2048	NA	intron (ENSMUST00000020695.12, intron 24 of 30)	protein_coding-intron (ENSMUST00000020695.12, intron 24 of 30)	22531	ENSMUST00000129074.1	ENSMUSG00000020422	ENSMUST00000134823			Tns3			protein_coding
e11ve16_cond2_1641	chr11	8473864	8474453	+	12.7358	NA	intron (ENSMUST00000239091.1, intron 20 of 30)	protein_coding-intron (ENSMUST00000020695.12, intron 20 of 30)	-5483	ENSMUST00000129074.1	ENSMUSG00000020422	ENSMUST00000134823			Tns3			protein_coding
e11ve16_cond2_1642	chr11	8482575	8483413	+	15.8643	NA	intron (ENSMUST00000020695.12, intron 17 of 30)	protein_coding-intron (ENSMUST00000020695.12, intron 17 of 30)	-14319	ENSMUST00000129074.1	ENSMUSG00000020422	ENSMUST00000134823			Tns3			protein_coding
e11ve16_cond2_1643	chr11	8500548	8501592	+	30.1705	NA	intron (ENSMUST00000020695.12, intron 16 of 30)	protein_coding-intron (ENSMUST00000020695.12, intron 16 of 30)	-32395	ENSMUST00000129074.1	ENSMUSG00000020422	ENSMUST00000134823			Tns3			protein_coding
e11ve16_cond2_1644	chr11	8523675	8523965	+	3.56902	NA	intron (ENSMUST00000239091.1, intron 13 of 30)	protein_coding-intron (ENSMUST00000020695.12, intron 13 of 30)	21531	ENSMUST00000131941.1	ENSMUSG00000020422	ENSMUST00000134823			Tns3			protein_coding
e11ve16_cond2_1645	chr11	8589376	8590027	+	11.3732	NA	intron (ENSMUST00000239091.1, intron 3 of 30)	protein_coding-intron (ENSMUST00000020695.12, intron 3 of 30)	-10580	ENSMUST00000134823.1	ENSMUSG00000020422	ENSMUST00000134823			Tns3			protein_coding
e11ve16_cond2_1646	chr11	8629189	8629485	+	5.47322	NA	intron (ENSMUST00000020695.12, intron 1 of 30)	protein_coding-intron (ENSMUST00000020695.12, intron 1 of 30)	-4450	ENSMUST00000239091.1	ENSMUSG00000020422	ENSMUST00000134823			Tns3			protein_coding
e11ve16_cond2_1647	chr11	8653853	8654284	+	4.90826	NA	intron (ENSMUST00000020695.12, intron 1 of 30)	protein_coding-intron (ENSMUST00000020695.12, intron 1 of 30)	10467	ENSMUST00000020695.12	ENSMUSG00000020422	ENSMUST00000134823			Tns3			protein_coding
e11ve16_cond2_1648	chr11	8792250	8792776	+	4.87656	NA	Intergenic	Intergenic	14335	ENSMUST00000121505.1	ENSMUSG00000081539	ENSMUST00000121505			Gm11990			processed_pseudogene
e11ve16_cond2_1649	chr11	8939297	8939953	+	6.03869	NA	intron (ENSMUST00000154153.7, intron 12 of 49)	protein_coding-intron (ENSMUST00000154153.7, intron 12 of 49)	10914	ENSMUST00000178195.1	ENSMUSG00000046634	ENSMUST00000154153			Pkd1l1			protein_coding
e11ve16_cond2_1650	chr11	8949327	8950668	+	35.6277	NA	intron (ENSMUST00000178195.1, intron 1 of 42)	protein_coding-intron (ENSMUST00000154153.7, intron 8 of 49)	542	ENSMUST00000178195.1	ENSMUSG00000046634	ENSMUST00000154153			Pkd1l1			protein_coding
e11ve16_cond2_1651	chr11	8958746	8959183	+	4.78624	NA	exon (ENSMUST00000154153.7, exon 6 of 50)	protein_coding-exon (ENSMUST00000154153.7, exon 6 of 50)	-8425	ENSMUST00000178195.1	ENSMUSG00000046634	ENSMUST00000154153			Pkd1l1			protein_coding
e11ve16_cond2_1652	chr11	9191024	9192091	+	6.91845	NA	promoter-TSS (ENSMUST00000042740.12)	protein_coding-promoter-TSS (ENSMUST00000042740.12)	-385	ENSMUST00000042740.12	ENSMUSG00000004668	ENSMUST00000141233			Abca13			protein_coding
e11ve16_cond2_1653	chr11	9203370	9203724	+	9.83892	NA	intron (ENSMUST00000151522.1, intron 1 of 5)	protein_coding-intron (ENSMUST00000042740.12, intron 1 of 61)	10096	ENSMUST00000151522.1	ENSMUSG00000004668	ENSMUST00000141233			Abca13			protein_coding
e11ve16_cond2_1654	chr11	9432915	9433236	+	5.07828	NA	intron (ENSMUST00000042740.12, intron 37 of 61)	protein_coding-intron (ENSMUST00000042740.12, intron 37 of 61)	239624	ENSMUST00000151522.1	ENSMUSG00000004668	ENSMUST00000141233			Abca13			protein_coding
e11ve16_cond2_1655	chr11	9441105	9441876	+	7.57301	NA	intron (ENSMUST00000042740.12, intron 38 of 61)	protein_coding-intron (ENSMUST00000042740.12, intron 38 of 61)	248039	ENSMUST00000151522.1	ENSMUSG00000004668	ENSMUST00000141233			Abca13			protein_coding
e11ve16_cond2_1656	chr11	9502073	9502290	+	3.95291	NA	intron (ENSMUST00000042740.12, intron 42 of 61)	protein_coding-intron (ENSMUST00000042740.12, intron 42 of 61)	203442	ENSMUST00000195362.1	ENSMUSG00000104137	ENSMUST00000195362			Gm36954			TEC
e11ve16_cond2_1657	chr11	9666551	9667602	+	51.7182	NA	intron (ENSMUST00000042740.12, intron 59 of 61)	protein_coding-intron (ENSMUST00000042740.12, intron 59 of 61)	38547	ENSMUST00000195362.1	ENSMUSG00000104137	ENSMUST00000195362			Gm36954			TEC
e11ve16_cond2_1658	chr11	9731782	9732048	+	3.35768	NA	Intergenic	Intergenic	5706	ENSMUST00000117907.1	ENSMUSG00000081629	ENSMUST00000117907			Eif3s6-ps1			processed_pseudogene
e11ve16_cond2_1659	chr11	11102280	11103119	+	27.3118	NA	Intergenic	Intergenic	-11524	ENSMUST00000109681.7	ENSMUSG00000050830	ENSMUST00000056344			Vwc2			protein_coding
e11ve16_cond2_1660	chr11	11114052	11114487	+	5.01587	NA	promoter-TSS (ENSMUST00000109681.7)	protein_coding-promoter-TSS (ENSMUST00000109681.7)	46	ENSMUST00000109681.7	ENSMUSG00000050830	ENSMUST00000056344			Vwc2			protein_coding
e11ve16_cond2_1661	chr11	11461720	11462490	+	10.9563	NA	promoter-TSS (ENSMUST00000170661.1)	protein_coding-promoter-TSS (ENSMUST00000170661.1)	11	ENSMUST00000170661.1	ENSMUSG00000020191	ENSMUST00000109678			Spata48			protein_coding
e11ve16_cond2_1662	chr11	11733218	11733591	+	6.19959	NA	intron (ENSMUST00000126058.7, intron 3 of 3)	protein_coding-intron (ENSMUST00000018798.6, intron 3 of 6)	-36965	ENSMUST00000132007.1	ENSMUSG00000073145	ENSMUST00000132007			Gm12000			lncRNA
e11ve16_cond2_1663	chr11	11809035	11809328	+	3.65053	NA	promoter-TSS (ENSMUST00000047689.10)	protein_coding-promoter-TSS (ENSMUST00000047689.10)	-219	ENSMUST00000171080.7	ENSMUSG00000035455	ENSMUST00000047689			Fignl1			protein_coding
e11ve16_cond2_1664	chr11	11848217	11849064	+	12.4962	NA	intron (ENSMUST00000178704.7, intron 6 of 14)	protein_coding-intron (ENSMUST00000066237.9, intron 6 of 14)	-12360	ENSMUST00000134401.1	ENSMUSG00000020182	ENSMUST00000066237			Ddc			protein_coding
e11ve16_cond2_1665	chr11	11850605	11851011	+	4.31425	NA	intron (ENSMUST00000178704.7, intron 6 of 14)	protein_coding-intron (ENSMUST00000066237.9, intron 6 of 14)	14099	ENSMUST00000122971.7	ENSMUSG00000020182	ENSMUST00000066237			Ddc			protein_coding
e11ve16_cond2_1666	chr11	11948456	11949805	+	14.2307	NA	TTS (ENSMUST00000142877.1)	protein_coding-TTS (ENSMUST00000142877.1)	-2800	ENSMUST00000148254.1	ENSMUSG00000020176	ENSMUST00000109654			Grb10			protein_coding
e11ve16_cond2_1667	chr11	11953520	11954266	+	6.65363	NA	TTS (ENSMUST00000143386.7)	protein_coding-TTS (ENSMUST00000143386.7)	2131	ENSMUST00000142877.1	ENSMUSG00000020176	ENSMUST00000109654			Grb10			protein_coding
e11ve16_cond2_1668	chr11	12231299	12232885	+	87.5521	NA	Intergenic	Intergenic	-82422	ENSMUST00000153794.8	ENSMUSG00000086584	ENSMUST00000153794			Gm12002			lncRNA
e11ve16_cond2_1669	chr11	12280428	12281082	+	4.84352	NA	intron (ENSMUST00000109650.7, intron 7 of 12)	protein_coding-intron (ENSMUST00000046755.13, intron 9 of 14)	-33759	ENSMUST00000153794.8	ENSMUSG00000086584	ENSMUST00000153794			Gm12002			lncRNA
e11ve16_cond2_1670	chr11	12332089	12332397	+	5.68919	NA	intron (ENSMUST00000174550.1, intron 1 of 2)	protein_coding-intron (ENSMUST00000046755.13, intron 7 of 14)	9968	ENSMUST00000174550.1	ENSMUSG00000086584	ENSMUST00000153794			Gm12002			lncRNA
e11ve16_cond2_1671	chr11	12421017	12421406	+	3.70697	NA	intron (ENSMUST00000130572.1, intron 1 of 8)	protein_coding-intron (ENSMUST00000046755.13, intron 1 of 14)	-9067	ENSMUST00000174874.7	ENSMUSG00000020173	ENSMUST00000172956			Cobl			protein_coding
e11ve16_cond2_1672	chr11	12424331	12424974	+	8.44024	NA	intron (ENSMUST00000130572.1, intron 1 of 8)	protein_coding-intron (ENSMUST00000046755.13, intron 1 of 14)	-12508	ENSMUST00000174874.7	ENSMUSG00000020173	ENSMUST00000172956			Cobl			protein_coding
e11ve16_cond2_1673	chr11	12464160	12465115	+	8.19653	NA	intron (ENSMUST00000130572.1, intron 1 of 8)	protein_coding-intron (ENSMUST00000046755.13, intron 1 of 14)	115	ENSMUST00000130572.1	ENSMUSG00000020173	ENSMUST00000172956			Cobl			protein_coding
e11ve16_cond2_1674	chr11	12479984	12480589	+	5.52106	NA	Intergenic	Intergenic	-15326	ENSMUST00000109651.8	ENSMUSG00000020173	ENSMUST00000172956			Cobl			protein_coding
e11ve16_cond2_1675	chr11	12524378	12524628	+	13.6509	NA	Intergenic	Intergenic	-59543	ENSMUST00000109651.8	ENSMUSG00000020173	ENSMUST00000172956			Cobl			protein_coding
e11ve16_cond2_1676	chr11	12600552	12601411	+	3.83377	NA	Intergenic	Intergenic	-75952	ENSMUST00000158409.1	ENSMUSG00000089034	ENSMUST00000158409			Gm22156			snoRNA
e11ve16_cond2_1677	chr11	16507936	16508674	+	6.77937	NA	promoter-TSS (ENSMUST00000109641.1)	protein_coding-promoter-TSS (ENSMUST00000109641.1)	-139	ENSMUST00000109642.7	ENSMUSG00000078974	ENSMUST00000131439			Sec61g			protein_coding
e11ve16_cond2_1678	chr11	16591639	16591842	+	4.30779	NA	Intergenic	Intergenic	44326	ENSMUST00000118481.1	ENSMUSG00000101316	ENSMUST00000118481			Gm12663			processed_pseudogene
e11ve16_cond2_1679	chr11	16751288	16752584	+	11.3006	NA	promoter-TSS (ENSMUST00000020329.12)	protein_coding-promoter-TSS (ENSMUST00000020329.12)	-267	ENSMUST00000102884.9	ENSMUSG00000020122	ENSMUST00000139722			Egfr			protein_coding
e11ve16_cond2_1680	chr11	16769532	16769820	+	4.05041	NA	intron (ENSMUST00000102884.9, intron 1 of 15)	protein_coding-intron (ENSMUST00000020329.12, intron 1 of 27)	17446	ENSMUST00000139722.1	ENSMUSG00000020122	ENSMUST00000139722			Egfr			protein_coding
e11ve16_cond2_1681	chr11	16796141	16796349	+	4.41692	NA	intron (ENSMUST00000102884.9, intron 1 of 15)	protein_coding-intron (ENSMUST00000020329.12, intron 1 of 27)	34457	ENSMUST00000150329.1	ENSMUSG00000085091	ENSMUST00000150329			Egfros			lncRNA
e11ve16_cond2_1682	chr11	16800359	16801083	+	19.4606	NA	intron (ENSMUST00000102884.9, intron 1 of 15)	protein_coding-intron (ENSMUST00000020329.12, intron 1 of 27)	29981	ENSMUST00000150329.1	ENSMUSG00000085091	ENSMUST00000150329			Egfros			lncRNA
e11ve16_cond2_1683	chr11	16809275	16809692	+	3.70939	NA	intron (ENSMUST00000102884.9, intron 1 of 15)	protein_coding-intron (ENSMUST00000020329.12, intron 1 of 27)	21219	ENSMUST00000150329.1	ENSMUSG00000085091	ENSMUST00000150329			Egfros			lncRNA
e11ve16_cond2_1684	chr11	16843595	16844880	+	12.7041	NA	intron (ENSMUST00000102884.9, intron 1 of 15)	protein_coding-intron (ENSMUST00000020329.12, intron 1 of 27)	-13535	ENSMUST00000150329.1	ENSMUSG00000085091	ENSMUST00000150329			Egfros			lncRNA
e11ve16_cond2_1685	chr11	16901030	16901590	+	4.18346	NA	intron (ENSMUST00000020329.12, intron 20 of 27)	protein_coding-intron (ENSMUST00000020329.12, intron 20 of 27)	-3875	ENSMUST00000138518.1	ENSMUSG00000020122	ENSMUST00000139722			Egfr			protein_coding
e11ve16_cond2_1686	chr11	16951076	16951518	+	7.20048	NA	promoter-TSS (ENSMUST00000061327.1)	protein_coding-promoter-TSS (ENSMUST00000061327.1)	-15	ENSMUST00000136053.7	ENSMUSG00000087060	ENSMUST00000123734			Eldr			lncRNA
e11ve16_cond2_1687	chr11	17159027	17159536	+	4.09815	NA	promoter-TSS (ENSMUST00000102880.4)	protein_coding-promoter-TSS (ENSMUST00000102880.4)	18	ENSMUST00000102880.4	ENSMUSG00000033953	ENSMUST00000102880			Ppp3r1			protein_coding
e11ve16_cond2_1688	chr11	17171042	17171908	+	12.3029	NA	intron (ENSMUST00000102880.4, intron 1 of 5)	protein_coding-intron (ENSMUST00000102880.4, intron 1 of 5)	-10632	ENSMUST00000151431.1	ENSMUSG00000078970	ENSMUST00000151431			Wdr92			protein_coding
e11ve16_cond2_1689	chr11	17211293	17211874	+	3.86545	NA	promoter-TSS (ENSMUST00000020317.7)	protein_coding-promoter-TSS (ENSMUST00000020317.7)	-15	ENSMUST00000020317.7	ENSMUSG00000020116	ENSMUST00000020317			Pno1			protein_coding
e11ve16_cond2_1690	chr11	17896104	17897201	+	8.46181	NA	Intergenic	Intergenic	57223	ENSMUST00000076661.6	ENSMUSG00000016984	ENSMUST00000076661			Etaa1			protein_coding
e11ve16_cond2_1691	chr11	17918052	17918314	+	5.38949	NA	Intergenic	Intergenic	35692	ENSMUST00000076661.6	ENSMUSG00000016984	ENSMUST00000076661			Etaa1			protein_coding
e11ve16_cond2_1692	chr11	17953339	17953993	+	10.0835	NA	promoter-TSS (ENSMUST00000140161.1)	lncRNA-promoter-TSS (ENSMUST00000140161.1)	209	ENSMUST00000076661.6	ENSMUSG00000016984	ENSMUST00000076661			Etaa1			protein_coding
e11ve16_cond2_1693	chr11	18165525	18166460	+	5.58228	NA	Intergenic	Intergenic	40952	ENSMUST00000121258.1	ENSMUSG00000080826	ENSMUST00000121258			Gm12019			processed_pseudogene
e11ve16_cond2_1694	chr11	18272613	18273061	+	8.8768	NA	Intergenic	Intergenic	54834	ENSMUST00000119030.1	ENSMUSG00000081302	ENSMUST00000119030			Gm12020			processed_pseudogene
e11ve16_cond2_1695	chr11	18295943	18296947	+	7.34179	NA	Intergenic	Intergenic	31226	ENSMUST00000119030.1	ENSMUSG00000081302	ENSMUST00000119030			Gm12020			processed_pseudogene
e11ve16_cond2_1696	chr11	19140562	19141347	+	9.67929	NA	Intergenic	Intergenic	-23520	ENSMUST00000193150.1	ENSMUSG00000102585	ENSMUST00000193150			Gm37439			TEC
e11ve16_cond2_1697	chr11	19912049	19912278	+	4.03813	NA	Intergenic	Intergenic	-12212	ENSMUST00000093299.12	ENSMUSG00000045671	ENSMUST00000123036			Spred2			protein_coding
e11ve16_cond2_1698	chr11	19919933	19920597	+	6.21366	NA	Intergenic	Intergenic	-4110	ENSMUST00000093299.12	ENSMUSG00000045671	ENSMUST00000123036			Spred2			protein_coding
e11ve16_cond2_1699	chr11	19982143	19983221	+	15.1688	NA	intron (ENSMUST00000123036.1, intron 1 of 5)	protein_coding-intron (ENSMUST00000093298.11, intron 1 of 5)	28112	ENSMUST00000123036.1	ENSMUSG00000045671	ENSMUST00000123036			Spred2			protein_coding
e11ve16_cond2_1700	chr11	19992101	19992593	+	4.39636	NA	intron (ENSMUST00000123036.1, intron 1 of 5)	protein_coding-intron (ENSMUST00000093298.11, intron 1 of 5)	37777	ENSMUST00000123036.1	ENSMUSG00000045671	ENSMUST00000123036			Spred2			protein_coding
e11ve16_cond2_1701	chr11	20201277	20202034	+	6.06776	NA	promoter-TSS (ENSMUST00000152728.1)	protein_coding-promoter-TSS (ENSMUST00000152728.1)	46	ENSMUST00000152728.1	ENSMUSG00000020149	ENSMUST00000109602			Rab1a			protein_coding
e11ve16_cond2_1702	chr11	20332733	20333354	+	8.68038	NA	promoter-TSS (ENSMUST00000004634.6)	protein_coding-promoter-TSS (ENSMUST00000004634.6)	-330	ENSMUST00000109594.7	ENSMUSG00000020142	ENSMUST00000004634			Slc1a4			protein_coding
e11ve16_cond2_1703	chr11	20460427	20461006	+	5.13953	NA	Intergenic	Intergenic	14304	ENSMUST00000119032.1	ENSMUSG00000083878	ENSMUST00000119032			Gm12034			processed_pseudogene
e11ve16_cond2_1704	chr11	20532724	20533425	+	11.3433	NA	Intergenic	Intergenic	-10179	ENSMUST00000145328.1	ENSMUSG00000049800	ENSMUST00000109586			Sertad2			protein_coding
e11ve16_cond2_1705	chr11	20542450	20543220	+	9.05548	NA	promoter-TSS (ENSMUST00000093292.10)	protein_coding-promoter-TSS (ENSMUST00000093292.10)	-418	ENSMUST00000145328.1	ENSMUSG00000049800	ENSMUST00000109586			Sertad2			protein_coding
e11ve16_cond2_1706	chr11	20631762	20632025	+	3.65622	NA	promoter-TSS (ENSMUST00000109586.2)	protein_coding-promoter-TSS (ENSMUST00000109586.2)	-86	ENSMUST00000109586.2	ENSMUSG00000049800	ENSMUST00000109586			Sertad2			protein_coding
e11ve16_cond2_1707	chr11	20858714	20859891	+	16.8999	NA	Intergenic	Intergenic	-11421	ENSMUST00000082737.1	ENSMUSG00000064671	ENSMUST00000082737			Gm22807			snoRNA
e11ve16_cond2_1708	chr11	20886838	20887317	+	9.17522	NA	Intergenic	Intergenic	-39196	ENSMUST00000082737.1	ENSMUSG00000064671	ENSMUST00000082737			Gm22807			snoRNA
e11ve16_cond2_1709	chr11	20896062	20896414	+	3.60189	NA	Intergenic	Intergenic	41463	ENSMUST00000178821.1	ENSMUSG00000096061	ENSMUST00000178821			Gm23681			miRNA
e11ve16_cond2_1710	chr11	20916659	20917104	+	7.29334	NA	Intergenic	Intergenic	20820	ENSMUST00000178821.1	ENSMUSG00000096061	ENSMUST00000178821			Gm23681			miRNA
e11ve16_cond2_1711	chr11	21016138	21016553	+	3.91908	NA	Intergenic	Intergenic	-74946	ENSMUST00000156122.7	ENSMUSG00000020134	ENSMUST00000101477			Peli1			protein_coding
e11ve16_cond2_1712	chr11	21061147	21061734	+	5.98412	NA	Intergenic	Intergenic	-29851	ENSMUST00000156122.7	ENSMUSG00000020134	ENSMUST00000101477			Peli1			protein_coding
e11ve16_cond2_1713	chr11	21370639	21371138	+	5.23988	NA	promoter-TSS (ENSMUST00000102875.10)	protein_coding-promoter-TSS (ENSMUST00000102875.10)	313	ENSMUST00000060895.5	ENSMUSG00000001891	ENSMUST00000143890			Ugp2			protein_coding
e11ve16_cond2_1714	chr11	21402706	21403120	+	9.0633	NA	Intergenic	Intergenic	-31712	ENSMUST00000060895.5	ENSMUSG00000001891	ENSMUST00000143890			Ugp2			protein_coding
e11ve16_cond2_1715	chr11	21571793	21572490	+	7.14016	NA	promoter-TSS (ENSMUST00000020568.9)	protein_coding-promoter-TSS (ENSMUST00000020568.9)	52	ENSMUST00000102874.10	ENSMUSG00000020321	ENSMUST00000144978			Mdh1			protein_coding
e11ve16_cond2_1716	chr11	21751276	21751654	+	4.26479	NA	intron (ENSMUST00000020568.9, intron 13 of 17)	protein_coding-intron (ENSMUST00000020568.9, intron 13 of 17)	56336	ENSMUST00000156624.1	ENSMUSG00000020319	ENSMUST00000149757			Wdpcp			protein_coding
e11ve16_cond2_1717	chr11	22155525	22155750	+	3.36023	NA	intron (ENSMUST00000045167.10, intron 6 of 23)	protein_coding-intron (ENSMUST00000045167.10, intron 6 of 23)	15773	ENSMUST00000136762.1	ENSMUSG00000042302	ENSMUST00000109563			Ehbp1			protein_coding
e11ve16_cond2_1718	chr11	22255497	22256001	+	8.98999	NA	intron (ENSMUST00000137594.1, intron 2 of 4)	protein_coding-intron (ENSMUST00000045167.10, intron 1 of 23)	30089	ENSMUST00000045167.10	ENSMUSG00000042302	ENSMUST00000109563			Ehbp1			protein_coding
e11ve16_cond2_1719	chr11	22286823	22287202	+	4.11285	NA	promoter-TSS (ENSMUST00000109563.8)	protein_coding-promoter-TSS (ENSMUST00000109563.8)	-217	ENSMUST00000109563.8	ENSMUSG00000042302	ENSMUST00000109563			Ehbp1			protein_coding
e11ve16_cond2_1720	chr11	22376625	22377202	+	4.68294	NA	Intergenic	Intergenic	-9379	ENSMUST00000117789.1	ENSMUSG00000083580	ENSMUST00000117789			Rpsa-ps3			processed_pseudogene
e11ve16_cond2_1721	chr11	22601947	22602307	+	3.8476	NA	Intergenic	Intergenic	-15281	ENSMUST00000142151.1	ENSMUSG00000086256	ENSMUST00000142151			Gm12052			lncRNA
e11ve16_cond2_1722	chr11	22621020	22622021	+	5.51623	NA	Intergenic	Intergenic	4112	ENSMUST00000142151.1	ENSMUSG00000086256	ENSMUST00000142151			Gm12052			lncRNA
e11ve16_cond2_1723	chr11	22800323	22800589	+	5.14881	NA	intron (ENSMUST00000189990.1, intron 1 of 5)	protein_coding-intron (ENSMUST00000189990.1, intron 1 of 5)	-13209	ENSMUST00000118614.1	ENSMUSG00000082576	ENSMUST00000118614			Gm12058			processed_pseudogene
e11ve16_cond2_1724	chr11	22810390	22810853	+	8.92272	NA	intron (ENSMUST00000189990.1, intron 1 of 5)	protein_coding-intron (ENSMUST00000189990.1, intron 1 of 5)	-23374	ENSMUST00000118614.1	ENSMUSG00000082576	ENSMUST00000118614			Gm12058			processed_pseudogene
e11ve16_cond2_1725	chr11	22847891	22848260	+	4.51381	NA	intron (ENSMUST00000160826.1, intron 2 of 2)	protein_coding-intron (ENSMUST00000055549.3, intron 1 of 1)	1207	ENSMUST00000104433.1	ENSMUSG00000077621	ENSMUST00000104433			Gm23772			snoRNA
e11ve16_cond2_1726	chr11	22859697	22860143	+	5.9163	NA	promoter-TSS (ENSMUST00000189990.1)	protein_coding-promoter-TSS (ENSMUST00000189990.1)	181	ENSMUST00000062844.10	ENSMUSG00000051650	ENSMUST00000062844			B3gnt2			protein_coding
e11ve16_cond2_1727	chr11	23255259	23255921	+	5.36468	NA	promoter-TSS (ENSMUST00000020538.12)	protein_coding-promoter-TSS (ENSMUST00000020538.12)	-451	ENSMUST00000109551.7	ENSMUSG00000020290	ENSMUST00000136235			Xpo1			protein_coding
e11ve16_cond2_1728	chr11	23306313	23306580	+	4.90066	NA	promoter-TSS (ENSMUST00000137823.7)	protein_coding-promoter-TSS (ENSMUST00000137823.7)	-449	ENSMUST00000180046.7	ENSMUSG00000056342	ENSMUST00000148927			Usp34			protein_coding
e11ve16_cond2_1729	chr11	23665890	23666302	+	5.90707	NA	promoter-TSS (ENSMUST00000020523.3)	protein_coding-promoter-TSS (ENSMUST00000020523.3)	89	ENSMUST00000058163.10	ENSMUSG00000020280	ENSMUST00000142287			Pus10			protein_coding
e11ve16_cond2_1730	chr11	23771065	23771366	+	4.52972	NA	promoter-TSS (ENSMUST00000102864.4)	protein_coding-promoter-TSS (ENSMUST00000102864.4)	-245	ENSMUST00000102864.4	ENSMUSG00000020275	ENSMUST00000102864			Rel			protein_coding
e11ve16_cond2_1731	chr11	24161931	24162603	+	9.74708	NA	intron (ENSMUST00000131383.1, intron 1 of 1)	lncRNA-intron (ENSMUST00000131383.1, intron 1 of 1)	10514	ENSMUST00000146717.1	ENSMUSG00000085516	ENSMUST00000131383			4930538E20Rik			lncRNA
e11ve16_cond2_1732	chr11	24297099	24297745	+	4.5899	NA	Intergenic	Intergenic	-94798	ENSMUST00000149592.1	ENSMUSG00000086117	ENSMUST00000149592			Gm12065			lncRNA
e11ve16_cond2_1733	chr11	25891391	25891617	+	6.32023	NA	intron (ENSMUST00000135168.1, intron 2 of 2)	protein_coding-intron (ENSMUST00000109511.7, intron 2 of 6)	-122363	ENSMUST00000179180.1	ENSMUSG00000032985	ENSMUST00000125773			5730522E02Rik			protein_coding
e11ve16_cond2_1734	chr11	25941620	25942112	+	8.76112	NA	intron (ENSMUST00000135168.1, intron 2 of 2)	protein_coding-intron (ENSMUST00000109511.7, intron 2 of 6)	139734	ENSMUST00000135168.1	ENSMUSG00000032985	ENSMUST00000125773			5730522E02Rik			protein_coding
e11ve16_cond2_1735	chr11	26387418	26388061	+	3.87778	NA	intron (ENSMUST00000143471.1, intron 1 of 3)	protein_coding-intron (ENSMUST00000004120.8, intron 1 of 13)	537	ENSMUST00000143471.1	ENSMUSG00000004018	ENSMUST00000143471			Fancl			protein_coding
e11ve16_cond2_1736	chr11	26409154	26409442	+	4.83755	NA	promoter-TSS (ENSMUST00000118404.1)	processed_pseudogene-promoter-TSS (ENSMUST00000118404.1)	91	ENSMUST00000118404.1	ENSMUSG00000081811	ENSMUST00000118404			Gm12713			processed_pseudogene
e11ve16_cond2_1737	chr11	26593129	26594057	+	15.6978	NA	promoter-TSS (ENSMUST00000124294.7)	protein_coding-promoter-TSS (ENSMUST00000124294.7)	10	ENSMUST00000125545.1	ENSMUSG00000064090	ENSMUST00000109504			Vrk2			protein_coding
e11ve16_cond2_1738	chr11	26963177	26963457	+	3.24569	NA	Intergenic	Intergenic	-88380	ENSMUST00000120189.1	ENSMUSG00000083895	ENSMUST00000120189			Gm12074			processed_pseudogene
e11ve16_cond2_1739	chr11	27203512	27204001	+	3.91903	NA	Intergenic	Intergenic	115222	ENSMUST00000157813.1	ENSMUSG00000088438	ENSMUST00000157813			Gm25387			snoRNA
e11ve16_cond2_1740	chr11	28365356	28365637	+	4.29801	NA	Intergenic	Intergenic	5134	ENSMUST00000152849.1	ENSMUSG00000084905	ENSMUST00000152849			Gm12081			lncRNA
e11ve16_cond2_1741	chr11	28496995	28497792	+	11.7491	NA	intron (ENSMUST00000093253.9, intron 2 of 4)	protein_coding-intron (ENSMUST00000042534.14, intron 2 of 3)	-63283	ENSMUST00000160016.7	ENSMUSG00000032878	ENSMUST00000093253			Ccdc85a			protein_coding
e11ve16_cond2_1742	chr11	28812086	28813075	+	14.8931	NA	intron (ENSMUST00000138164.1, intron 3 of 3)	lncRNA-intron (ENSMUST00000138164.1, intron 3 of 3)	-40624	ENSMUST00000020759.11	ENSMUSG00000020467	ENSMUST00000020759			Efemp1			protein_coding
e11ve16_cond2_1743	chr11	28817346	28818224	+	8.3949	NA	Intergenic	Intergenic	-35419	ENSMUST00000020759.11	ENSMUSG00000020467	ENSMUST00000020759			Efemp1			protein_coding
e11ve16_cond2_1744	chr11	28833702	28834547	+	12.1807	NA	Intergenic	Intergenic	-19080	ENSMUST00000020759.11	ENSMUSG00000020467	ENSMUST00000020759			Efemp1			protein_coding
e11ve16_cond2_1745	chr11	29130436	29131135	+	4.37253	NA	promoter-TSS (ENSMUST00000020756.8)	protein_coding-promoter-TSS (ENSMUST00000020756.8)	37	ENSMUST00000148173.1	ENSMUSG00000020464	ENSMUST00000131527			Pnpt1			protein_coding
e11ve16_cond2_1746	chr11	29373661	29373967	+	7.63373	NA	promoter-TSS (ENSMUST00000109477.1)	protein_coding-promoter-TSS (ENSMUST00000109477.1)	37	ENSMUST00000109477.1	ENSMUSG00000032740	ENSMUST00000123561			Ccdc88a			protein_coding
e11ve16_cond2_1747	chr11	29514502	29515060	+	4.64774	NA	promoter-TSS (ENSMUST00000138402.1)	lncRNA-promoter-TSS (ENSMUST00000138402.1)	250	ENSMUST00000133103.1	ENSMUSG00000032673	ENSMUST00000039900			Prorsd1			protein_coding
e11ve16_cond2_1748	chr11	29638728	29639086	+	4.37451	NA	intron (ENSMUST00000125194.1, intron 1 of 2)	lncRNA-intron (ENSMUST00000125194.1, intron 1 of 2)	6602	ENSMUST00000125194.1	ENSMUSG00000084850	ENSMUST00000125194			Gm12092			lncRNA
e11ve16_cond2_1749	chr11	29692608	29692989	+	4.18345	NA	promoter-TSS (ENSMUST00000078830.10)	protein_coding-promoter-TSS (ENSMUST00000078830.10)	-149	ENSMUST00000102843.9	ENSMUSG00000020458	ENSMUST00000156217			Rtn4			protein_coding
e11ve16_cond2_1750	chr11	29913443	29913700	+	4.43796	NA	intron (ENSMUST00000058902.5, intron 2 of 41)	protein_coding-intron (ENSMUST00000058902.5, intron 2 of 41)	64110	ENSMUST00000157510.1	ENSMUSG00000088135	ENSMUST00000157510			Gm22588			snoRNA
e11ve16_cond2_1751	chr11	30025924	30026229	+	7.17531	NA	promoter-TSS (ENSMUST00000058902.5)	protein_coding-promoter-TSS (ENSMUST00000058902.5)	-43	ENSMUST00000058902.5	ENSMUSG00000044072	ENSMUST00000169980			Eml6			protein_coding
e11ve16_cond2_1752	chr11	30209620	30209974	+	6.12948	NA	intron (ENSMUST00000006629.13, intron 2 of 35)	protein_coding-intron (ENSMUST00000006629.13, intron 2 of 35)	9975	ENSMUST00000011877.12	ENSMUSG00000020315	ENSMUST00000102838			Sptbn1			protein_coding
e11ve16_cond2_1753	chr11	30240888	30241143	+	6.59035	NA	intron (ENSMUST00000006629.13, intron 1 of 35)	protein_coding-intron (ENSMUST00000006629.13, intron 1 of 35)	-21243	ENSMUST00000011877.12	ENSMUSG00000020315	ENSMUST00000102838			Sptbn1			protein_coding
e11ve16_cond2_1754	chr11	30267915	30268118	+	3.33702	NA	promoter-TSS (ENSMUST00000124231.1)	protein_coding-promoter-TSS (ENSMUST00000124231.1)	153	ENSMUST00000006629.13	ENSMUSG00000020315	ENSMUST00000102838			Sptbn1			protein_coding
e11ve16_cond2_1755	chr11	30288105	30290082	+	9.78154	NA	Intergenic	Intergenic	-20918	ENSMUST00000149117.1	ENSMUSG00000020315	ENSMUST00000102838			Sptbn1			protein_coding
e11ve16_cond2_1756	chr11	30572689	30572971	+	4.41807	NA	TTS (ENSMUST00000121523.1)	processed_pseudogene-TTS (ENSMUST00000121523.1)	1624	ENSMUST00000121523.1	ENSMUSG00000081887	ENSMUST00000121523			Gm12097			processed_pseudogene
e11ve16_cond2_1757	chr11	30771975	30772269	+	4.03977	NA	promoter-TSS (ENSMUST00000154757.1)	protein_coding-promoter-TSS (ENSMUST00000154757.1)	-199	ENSMUST00000154757.1	ENSMUSG00000040850	ENSMUST00000155719			Psme4			protein_coding
e11ve16_cond2_1758	chr11	30985944	30986906	+	7.38202	NA	promoter-TSS (ENSMUST00000020553.4)	protein_coding-promoter-TSS (ENSMUST00000020553.4)	-75	ENSMUST00000101394.4	ENSMUSG00000020309	ENSMUST00000101394			Chac2			protein_coding
e11ve16_cond2_1759	chr11	31362291	31362974	+	12.0145	NA	intron (ENSMUST00000020546.2, intron 3 of 3)	protein_coding-intron (ENSMUST00000020546.2, intron 3 of 3)	5534	ENSMUST00000149467.1	ENSMUSG00000020303	ENSMUST00000134199			Stc2			protein_coding
e11ve16_cond2_1760	chr11	31617276	31617888	+	5.15975	NA	Intergenic	Intergenic	54145	ENSMUST00000109415.1	ENSMUSG00000044502	ENSMUST00000058060			Bod1			protein_coding
e11ve16_cond2_1761	chr11	31713724	31714163	+	5.68112	NA	Intergenic	Intergenic	15295	ENSMUST00000192490.1	ENSMUSG00000103635	ENSMUST00000192490			Gm38061			TEC
e11ve16_cond2_1762	chr11	31738032	31738686	+	12.7495	NA	Intergenic	Intergenic	39711	ENSMUST00000192490.1	ENSMUSG00000103635	ENSMUST00000192490			Gm38061			TEC
e11ve16_cond2_1763	chr11	31740255	31741088	+	12.3769	NA	Intergenic	Intergenic	42023	ENSMUST00000192490.1	ENSMUSG00000103635	ENSMUST00000192490			Gm38061			TEC
e11ve16_cond2_1764	chr11	31807636	31808410	+	5.91902	NA	intron (ENSMUST00000134944.1, intron 1 of 4)	lncRNA-intron (ENSMUST00000129425.7, intron 1 of 3)	16450	ENSMUST00000126265.1	ENSMUSG00000085772	ENSMUST00000134944			D630024D03Rik			lncRNA
e11ve16_cond2_1765	chr11	31824424	31825038	+	6.88299	NA	promoter-TSS (ENSMUST00000126265.1)	lncRNA-promoter-TSS (ENSMUST00000126265.1)	-207	ENSMUST00000134944.1	ENSMUSG00000085772	ENSMUST00000134944			D630024D03Rik			lncRNA
e11ve16_cond2_1766	chr11	31851579	31852428	+	6.45667	NA	Intergenic	Intergenic	19343	ENSMUST00000132857.1	ENSMUSG00000086335	ENSMUST00000132857			Gm12107			lncRNA
e11ve16_cond2_1767	chr11	32332041	32332371	+	5.89631	NA	Intergenic	Intergenic	-15614	ENSMUST00000239041.1	ENSMUSG00000040711	ENSMUST00000239041			Sh3pxd2b			protein_coding
e11ve16_cond2_1768	chr11	32383688	32384366	+	5.99768	NA	intron (ENSMUST00000239041.1, intron 3 of 13)	protein_coding-intron (ENSMUST00000038753.5, intron 3 of 12)	36187	ENSMUST00000138771.1	ENSMUSG00000040711	ENSMUST00000239041			Sh3pxd2b			protein_coding
e11ve16_cond2_1769	chr11	32552489	32553484	+	7.15339	NA	intron (ENSMUST00000102821.3, intron 1 of 18)	protein_coding-intron (ENSMUST00000102821.3, intron 1 of 18)	19681	ENSMUST00000102821.3	ENSMUSG00000020272	ENSMUST00000102821			Stk10			protein_coding
e11ve16_cond2_1770	chr11	32585941	32586281	+	4.19834	NA	intron (ENSMUST00000102821.3, intron 4 of 18)	protein_coding-intron (ENSMUST00000102821.3, intron 4 of 18)	-2484	ENSMUST00000143397.1	ENSMUSG00000020272	ENSMUST00000102821			Stk10			protein_coding
e11ve16_cond2_1771	chr11	32907710	32908318	+	10.8336	NA	intron (ENSMUST00000150073.1, intron 2 of 2)	lncRNA-intron (ENSMUST00000150073.1, intron 2 of 2)	-2359	ENSMUST00000117772.1	ENSMUSG00000081254	ENSMUST00000117772			Gm12112			processed_pseudogene
e11ve16_cond2_1772	chr11	33142752	33143193	+	7.98863	NA	intron (ENSMUST00000020507.7, intron 2 of 4)	protein_coding-intron (ENSMUST00000020507.7, intron 2 of 4)	3823	ENSMUST00000109363.7	ENSMUSG00000057967	ENSMUST00000020507			Fgf18			protein_coding
e11ve16_cond2_1773	chr11	33217505	33217900	+	10.369	NA	intron (ENSMUST00000102815.9, intron 26 of 27)	protein_coding-intron (ENSMUST00000102815.9, intron 26 of 27)	13647	ENSMUST00000131851.1	ENSMUSG00000087501	ENSMUST00000131851			Gm12116			lncRNA
e11ve16_cond2_1774	chr11	33660201	33660665	+	5.14539	NA	intron (ENSMUST00000109340.8, intron 1 of 8)	protein_coding-intron (ENSMUST00000065970.5, intron 1 of 7)	20138	ENSMUST00000238436.1	ENSMUSG00000053519	ENSMUST00000065970			Kcnip1			protein_coding
e11ve16_cond2_1775	chr11	33872262	33873393	+	6.02735	NA	intron (ENSMUST00000154760.1, intron 1 of 2)	protein_coding-intron (ENSMUST00000135034.1, intron 1 of 3)	-29242	ENSMUST00000109340.8	ENSMUSG00000053519	ENSMUST00000065970			Kcnip1			protein_coding
e11ve16_cond2_1776	chr11	33911895	33912594	+	25.3199	NA	intron (ENSMUST00000154760.1, intron 1 of 2)	protein_coding-intron (ENSMUST00000135034.1, intron 1 of 3)	-50769	ENSMUST00000020362.2	ENSMUSG00000020155	ENSMUST00000020362			Kcnmb1			protein_coding
e11ve16_cond2_1777	chr11	33951560	33952751	+	8.10467	NA	intron (ENSMUST00000154760.1, intron 1 of 2)	protein_coding-intron (ENSMUST00000135034.1, intron 1 of 3)	-10858	ENSMUST00000020362.2	ENSMUSG00000020155	ENSMUST00000020362			Kcnmb1			protein_coding
e11ve16_cond2_1778	chr11	34154021	34154274	+	4.92796	NA	Intergenic	Intergenic	12320	ENSMUST00000131630.1	ENSMUSG00000086243	ENSMUST00000131630			Gm12121			lncRNA
e11ve16_cond2_1779	chr11	34181381	34182369	+	7.63243	NA	Intergenic	Intergenic	26214	ENSMUST00000060271.2	ENSMUSG00000047861	ENSMUST00000060271			Foxi1			protein_coding
e11ve16_cond2_1780	chr11	34284639	34285265	+	6.24345	NA	intron (ENSMUST00000093193.11, intron 32 of 51)	protein_coding-intron (ENSMUST00000093193.11, intron 32 of 51)	-14755	ENSMUST00000147359.1	ENSMUSG00000087122	ENSMUST00000147359			4930403D09Rik			lncRNA
e11ve16_cond2_1781	chr11	34833669	34833957	+	6.7525	NA	promoter-TSS (ENSMUST00000093191.2)	protein_coding-promoter-TSS (ENSMUST00000093191.2)	-172	ENSMUST00000093191.2	ENSMUSG00000069910	ENSMUST00000093191			Spdl1			protein_coding
e11ve16_cond2_1782	chr11	35017146	35017469	+	3.5897	NA	Intergenic	Intergenic	-103917	ENSMUST00000069837.3	ENSMUSG00000056427	ENSMUST00000156571			Slit3			protein_coding
e11ve16_cond2_1783	chr11	35557463	35557920	+	3.52487	NA	intron (ENSMUST00000069837.3, intron 6 of 35)	protein_coding-intron (ENSMUST00000069837.3, intron 6 of 35)	13006	ENSMUST00000124438.1	ENSMUSG00000056427	ENSMUST00000156571			Slit3			protein_coding
e11ve16_cond2_1784	chr11	35769286	35770045	+	15.0556	NA	exon (ENSMUST00000018990.7, exon 1 of 7)	protein_coding-exon (ENSMUST00000018990.7, exon 1 of 7)	181	ENSMUST00000018990.7	ENSMUSG00000018846	ENSMUST00000018990			Pank3			protein_coding
e11ve16_cond2_1785	chr11	35892629	35893427	+	7.13078	NA	intron (ENSMUST00000018993.6, intron 5 of 22)	protein_coding-intron (ENSMUST00000018993.6, intron 5 of 22)	-17316	ENSMUST00000127086.1	ENSMUSG00000018849	ENSMUST00000131001			Wwc1			protein_coding
e11ve16_cond2_1786	chr11	35919778	35920504	+	6.84149	NA	intron (ENSMUST00000018993.6, intron 1 of 22)	protein_coding-intron (ENSMUST00000018993.6, intron 1 of 22)	-44429	ENSMUST00000127086.1	ENSMUSG00000018849	ENSMUST00000131001			Wwc1			protein_coding
e11ve16_cond2_1787	chr11	35938751	35939278	+	5.00152	NA	intron (ENSMUST00000018993.6, intron 1 of 22)	protein_coding-intron (ENSMUST00000018993.6, intron 1 of 22)	41513	ENSMUST00000018993.6	ENSMUSG00000018849	ENSMUST00000131001			Wwc1			protein_coding
e11ve16_cond2_1788	chr11	35950390	35951066	+	8.57525	NA	intron (ENSMUST00000018993.6, intron 1 of 22)	protein_coding-intron (ENSMUST00000018993.6, intron 1 of 22)	29799	ENSMUST00000018993.6	ENSMUSG00000018849	ENSMUST00000131001			Wwc1			protein_coding
e11ve16_cond2_1789	chr11	35963698	35964289	+	7.05111	NA	intron (ENSMUST00000018993.6, intron 1 of 22)	protein_coding-intron (ENSMUST00000018993.6, intron 1 of 22)	16534	ENSMUST00000018993.6	ENSMUSG00000018849	ENSMUST00000131001			Wwc1			protein_coding
e11ve16_cond2_1790	chr11	35970859	35971967	+	40.0504	NA	intron (ENSMUST00000018993.6, intron 1 of 22)	protein_coding-intron (ENSMUST00000018993.6, intron 1 of 22)	9114	ENSMUST00000018993.6	ENSMUSG00000018849	ENSMUST00000131001			Wwc1			protein_coding
e11ve16_cond2_1791	chr11	36001125	36001415	+	3.59736	NA	Intergenic	Intergenic	5216	ENSMUST00000117261.1	ENSMUSG00000081571	ENSMUST00000117261			Gm12125			processed_pseudogene
e11ve16_cond2_1792	chr11	36035985	36036829	+	7.90972	NA	intron (ENSMUST00000057207.5, intron 25 of 28)	protein_coding-intron (ENSMUST00000057207.5, intron 25 of 28)	40353	ENSMUST00000117261.1	ENSMUSG00000081571	ENSMUST00000117261			Gm12125			processed_pseudogene
e11ve16_cond2_1793	chr11	37031215	37031484	+	5.68858	NA	intron (ENSMUST00000157030.1, intron 2 of 3)	protein_coding-intron (ENSMUST00000102801.7, intron 2 of 30)	-87183	ENSMUST00000163524.7	ENSMUSG00000049336	ENSMUST00000149787			Tenm2			protein_coding
e11ve16_cond2_1794	chr11	37220788	37221755	+	22.4472	NA	intron (ENSMUST00000102801.7, intron 1 of 30)	protein_coding-intron (ENSMUST00000102801.7, intron 1 of 30)	14611	ENSMUST00000102801.7	ENSMUSG00000049336	ENSMUST00000149787			Tenm2			protein_coding
e11ve16_cond2_1795	chr11	37470635	37471511	+	15.1059	NA	Intergenic	Intergenic	-187916	ENSMUST00000131013.1	ENSMUSG00000087388	ENSMUST00000131013			Gm12128			lncRNA
e11ve16_cond2_1796	chr11	37503723	37504603	+	19.7125	NA	Intergenic	Intergenic	-154826	ENSMUST00000131013.1	ENSMUSG00000087388	ENSMUST00000131013			Gm12128			lncRNA
e11ve16_cond2_1797	chr11	37532616	37532930	+	7.60211	NA	Intergenic	Intergenic	-126216	ENSMUST00000131013.1	ENSMUSG00000087388	ENSMUST00000131013			Gm12128			lncRNA
e11ve16_cond2_1798	chr11	37556794	37557697	+	15.2082	NA	Intergenic	Intergenic	-101744	ENSMUST00000131013.1	ENSMUSG00000087388	ENSMUST00000131013			Gm12128			lncRNA
e11ve16_cond2_1799	chr11	37769190	37769991	+	13.6999	NA	Intergenic	Intergenic	110601	ENSMUST00000131013.1	ENSMUSG00000087388	ENSMUST00000131013			Gm12128			lncRNA
e11ve16_cond2_1800	chr11	38203441	38204197	+	6.7178	NA	Intergenic	Intergenic	-15250	ENSMUST00000120104.1	ENSMUSG00000082587	ENSMUST00000120104			Gm12129			processed_pseudogene
e11ve16_cond2_1801	chr11	38721416	38722174	+	15.5887	NA	Intergenic	Intergenic	76482	ENSMUST00000093736.1	ENSMUSG00000070249	ENSMUST00000093736			Gm23520			snRNA
e11ve16_cond2_1802	chr11	38728889	38729633	+	10.8291	NA	Intergenic	Intergenic	69016	ENSMUST00000093736.1	ENSMUSG00000070249	ENSMUST00000093736			Gm23520			snRNA
e11ve16_cond2_1803	chr11	38888051	38888405	+	8.5589	NA	Intergenic	Intergenic	-89951	ENSMUST00000093736.1	ENSMUSG00000070249	ENSMUST00000093736			Gm23520			snRNA
e11ve16_cond2_1804	chr11	39917173	39918489	+	15.9754	NA	Intergenic	Intergenic	87175	ENSMUST00000157978.1	ENSMUSG00000088603	ENSMUST00000157978			Gm24192			snRNA
e11ve16_cond2_1805	chr11	40107638	40108111	+	4.26748	NA	intron (ENSMUST00000130945.1, intron 2 of 7)	lncRNA-intron (ENSMUST00000130945.1, intron 2 of 7)	99680	ENSMUST00000130945.1	ENSMUSG00000085301	ENSMUST00000130945			Gm12132			lncRNA
e11ve16_cond2_1806	chr11	40692388	40692755	+	10.4552	NA	promoter-TSS (ENSMUST00000109307.1)	protein_coding-promoter-TSS (ENSMUST00000109307.1)	50	ENSMUST00000141830.7	ENSMUSG00000042032	ENSMUST00000040167			Mat2b			protein_coding
e11ve16_cond2_1807	chr11	40754673	40755412	+	5.68338	NA	exon (ENSMUST00000020576.7, exon 1 of 6)	protein_coding-exon (ENSMUST00000020576.7, exon 1 of 6)	269	ENSMUST00000020576.7	ENSMUSG00000020326	ENSMUST00000020576			Ccng1			protein_coding
e11ve16_cond2_1808	chr11	42939156	42939797	+	5.15205	NA	Intergenic	Intergenic	41981	ENSMUST00000122678.1	ENSMUSG00000084627	ENSMUST00000122678			Gm25543			misc_RNA
e11ve16_cond2_1809	chr11	43548523	43549112	+	4.44937	NA	intron (ENSMUST00000050574.6, intron 2 of 5)	protein_coding-intron (ENSMUST00000050574.6, intron 2 of 5)	19571	ENSMUST00000152153.1	ENSMUSG00000044707	ENSMUST00000152153			Ccnjl			protein_coding
e11ve16_cond2_1810	chr11	43549272	43549758	+	4.29318	NA	intron (ENSMUST00000050574.6, intron 2 of 5)	protein_coding-intron (ENSMUST00000050574.6, intron 2 of 5)	20269	ENSMUST00000152153.1	ENSMUSG00000044707	ENSMUST00000152153			Ccnjl			protein_coding
e11ve16_cond2_1811	chr11	43642665	43643928	+	23.3422	NA	Intergenic	Intergenic	-26967	ENSMUST00000117511.1	ENSMUSG00000082614	ENSMUST00000117511			Gm12149			processed_pseudogene
e11ve16_cond2_1812	chr11	43698531	43699142	+	6.7083	NA	intron (ENSMUST00000109280.1, intron 1 of 1)	protein_coding-intron (ENSMUST00000061070.5, intron 1 of 1)	-6407	ENSMUST00000129229.1	ENSMUSG00000044950	ENSMUST00000129229			Pwwp2a			protein_coding
e11ve16_cond2_1813	chr11	43961629	43961970	+	9.88356	NA	intron (ENSMUST00000148504.1, intron 1 of 6)	lncRNA-intron (ENSMUST00000148504.1, intron 1 of 6)	2710	ENSMUST00000148504.1	ENSMUSG00000087172	ENSMUST00000148504			Gm12153			lncRNA
e11ve16_cond2_1814	chr11	44453620	44453852	+	4.07283	NA	TTS (ENSMUST00000102795.3)	protein_coding-TTS (ENSMUST00000102795.3)	4506	ENSMUST00000151875.7	ENSMUSG00000041231	ENSMUST00000156551			Ublcp1			protein_coding
e11ve16_cond2_1815	chr11	44564318	44565387	+	13.5084	NA	exon (ENSMUST00000019333.9, exon 11 of 11)	protein_coding-exon (ENSMUST00000019333.9, exon 11 of 11)	4833	ENSMUST00000129676.1	ENSMUSG00000019189	ENSMUST00000150257			Rnf145			protein_coding
e11ve16_cond2_1816	chr11	45106787	45107037	+	4.23512	NA	intron (ENSMUST00000143869.1, intron 2 of 2)	lncRNA-intron (ENSMUST00000143869.1, intron 2 of 2)	10016	ENSMUST00000143869.1	ENSMUSG00000084773	ENSMUST00000143869			Gm12159			lncRNA
e11ve16_cond2_1817	chr11	45880923	45882058	+	12.4969	NA	promoter-TSS (ENSMUST00000133715.1)	protein_coding-promoter-TSS (ENSMUST00000133715.1)	-907	ENSMUST00000133715.1	ENSMUSG00000006169	ENSMUST00000109260			Clint1			protein_coding
e11ve16_cond2_1818	chr11	45991702	45992208	+	3.81514	NA	exon (ENSMUST00000049038.3, exon 4 of 5)	protein_coding-exon (ENSMUST00000049038.3, exon 4 of 5)	11645	ENSMUST00000049038.3	ENSMUSG00000040489	ENSMUST00000049038			Sox30			protein_coding
e11ve16_cond2_1819	chr11	46065385	46065656	+	8.07137	NA	TTS (ENSMUST00000137014.1)	protein_coding-TTS (ENSMUST00000137014.1)	9462	ENSMUST00000137014.1	ENSMUSG00000011256	ENSMUST00000011400			Adam19			protein_coding
e11ve16_cond2_1820	chr11	46085214	46085891	+	9.17773	NA	intron (ENSMUST00000011400.7, intron 3 of 22)	protein_coding-intron (ENSMUST00000011400.7, intron 3 of 22)	-16718	ENSMUST00000184230.1	ENSMUSG00000098942	ENSMUST00000184230			Mir8100			miRNA
e11ve16_cond2_1821	chr11	46245893	46246776	+	14.9603	NA	intron (ENSMUST00000093166.10, intron 21 of 30)	protein_coding-intron (ENSMUST00000093165.11, intron 21 of 30)	-2140	ENSMUST00000117362.1	ENSMUSG00000081078	ENSMUST00000117362			Gm12568			processed_pseudogene
e11ve16_cond2_1822	chr11	46309229	46309434	+	4.76848	NA	intron (ENSMUST00000093165.11, intron 1 of 30)	protein_coding-intron (ENSMUST00000093165.11, intron 1 of 30)	2889	ENSMUST00000129474.1	ENSMUSG00000020340	ENSMUST00000093165			Cyfip2			protein_coding
e11ve16_cond2_1823	chr11	47379094	47379374	+	6.19396	NA	intron (ENSMUST00000109220.7, intron 1 of 6)	protein_coding-intron (ENSMUST00000077221.5, intron 1 of 7)	288	ENSMUST00000077221.5	ENSMUSG00000020354	ENSMUST00000077221			Sgcd			protein_coding
e11ve16_cond2_1824	chr11	48520705	48520945	+	4.37963	NA	Intergenic	Intergenic	31699	ENSMUST00000118344.1	ENSMUSG00000083954	ENSMUST00000118344			Gm12179			processed_pseudogene
e11ve16_cond2_1825	chr11	48525196	48525873	+	10.7095	NA	Intergenic	Intergenic	26990	ENSMUST00000118344.1	ENSMUSG00000083954	ENSMUST00000118344			Gm12179			processed_pseudogene
[truncated: 10,155 more rows]
