# Supplementary material for: PI3K signaling specifies proximal-distal fate by driving a developmental gene regulatory network in SOX9+ mouse lung progenitors
Source: eLife. 2022 Aug 17;11:e67954. doi: 10.7554/eLife.67954 (PMC9427112; doi:10.7554/eLife.67954)
Supplement: Supplementary file 6. [file elife-67954-supp6.xlsx]

## Sheet: Sheet1
Supplemental File 6. Annotated Common Accessible Regions
PeakID	Chr	Start	End	Strand	Peak Score	Focus Ratio/Region Size	Annotation	Detailed Annotation	Distance to TSS	Nearest PromoterID	Entrez ID	Nearest Unigene	Nearest Refseq	Nearest Ensembl	Gene Name	Gene Alias	Gene Description	Gene Type
e11ve16_common_190	chr1	3913287	3913679	+	1.27149	NA	intron (ENSMUST00000194643.1, intron 2 of 2)	lncRNA-intron (ENSMUST00000194643.1, intron 2 of 2)	72501	ENSMUST00000192427.1	ENSMUSG00000102343	ENSMUST00000194643			Gm37381			lncRNA
e11ve16_common_191	chr1	3913911	3914205	+	1.23878	NA	intron (ENSMUST00000194643.1, intron 2 of 2)	lncRNA-intron (ENSMUST00000194643.1, intron 2 of 2)	71926	ENSMUST00000192427.1	ENSMUSG00000102343	ENSMUST00000194643			Gm37381			lncRNA
e11ve16_common_192	chr1	4228260	4228555	+	0.2017	NA	intron (ENSMUST00000208660.1, intron 14 of 29)	protein_coding-intron (ENSMUST00000208660.1, intron 14 of 29)	32112	ENSMUST00000195384.1	ENSMUSG00000102948	ENSMUST00000195384			Gm6101			processed_pseudogene
e11ve16_common_193	chr1	4257161	4258353	+	0.39861	NA	intron (ENSMUST00000195384.1, intron 1 of 1)	processed_pseudogene-intron (ENSMUST00000195384.1, intron 1 of 1)	2762	ENSMUST00000195384.1	ENSMUSG00000102948	ENSMUST00000195384			Gm6101			processed_pseudogene
e11ve16_common_194	chr1	4491822	4492050	+	2.65344	NA	TTS (ENSMUST00000191647.1)	protein_coding-TTS (ENSMUST00000191647.1)	1668	ENSMUST00000192505.1	ENSMUSG00000025902	ENSMUST00000192505			Sox17			protein_coding
e11ve16_common_195	chr1	4492220	4492526	+	1.01398	NA	TTS (ENSMUST00000191647.1)	protein_coding-TTS (ENSMUST00000191647.1)	1231	ENSMUST00000192505.1	ENSMUSG00000025902	ENSMUST00000192505			Sox17			protein_coding
e11ve16_common_196	chr1	4496837	4497094	+	1.25137	NA	promoter-TSS (ENSMUST00000027035.9)	protein_coding-promoter-TSS (ENSMUST00000027035.9)	-208	ENSMUST00000195555.1	ENSMUSG00000025902	ENSMUST00000192505			Sox17			protein_coding
e11ve16_common_197	chr1	4571293	4572219	+	0.821	NA	Intergenic	Intergenic	14496	ENSMUST00000195771.1	ENSMUSG00000104328	ENSMUST00000195771			Gm37323			lncRNA
e11ve16_common_198	chr1	4645449	4645654	+	1.74442	NA	Intergenic	Intergenic	35080	ENSMUST00000192738.1	ENSMUSG00000102735	ENSMUST00000192738			Gm7369			processed_pseudogene
e11ve16_common_199	chr1	4724712	4725062	+	0.01742	NA	Intergenic	Intergenic	-1508	ENSMUST00000157375.1	ENSMUSG00000088000	ENSMUST00000157375			Gm25493			snRNA
e11ve16_common_200	chr1	4785084	4786242	+	0.43325	NA	promoter-TSS (ENSMUST00000045689.13)	protein_coding-promoter-TSS (ENSMUST00000045689.13)	29	ENSMUST00000132625.1	ENSMUSG00000033845	ENSMUST00000115538			Mrpl15			protein_coding
e11ve16_common_201	chr1	4808166	4808718	+	0.31977	NA	intron (ENSMUST00000131119.1, intron 1 of 7)	protein_coding-intron (ENSMUST00000027036.10, intron 1 of 8)	205	ENSMUST00000131119.1	ENSMUSG00000025903	ENSMUST00000134384			Lypla1			protein_coding
e11ve16_common_202	chr1	4857062	4857412	+	1.55682	NA	promoter-TSS (ENSMUST00000081551.13)	protein_coding-promoter-TSS (ENSMUST00000081551.13)	-577	ENSMUST00000081551.13	ENSMUSG00000033813	ENSMUST00000081551			Tcea1			protein_coding
e11ve16_common_203	chr1	4858088	4858601	+	0.69265	NA	exon (ENSMUST00000165720.2, exon 1 of 10)	protein_coding-exon (ENSMUST00000165720.2, exon 1 of 10)	306	ENSMUST00000165720.2	ENSMUSG00000033813	ENSMUST00000081551			Tcea1			protein_coding
e11ve16_common_204	chr1	5083476	5083686	+	1.07295	NA	exon (ENSMUST00000194676.5, exon 1 of 5)	protein_coding-exon (ENSMUST00000194676.5, exon 1 of 5)	417	ENSMUST00000192142.1	ENSMUSG00000033793	ENSMUST00000192029			Atp6v1h			protein_coding
e11ve16_common_205	chr1	5588043	5588635	+	0.9024	NA	promoter-TSS (ENSMUST00000027038.10)	protein_coding-promoter-TSS (ENSMUST00000027038.10)	-127	ENSMUST00000192685.1	ENSMUSG00000025905	ENSMUST00000192685			Oprk1			protein_coding
e11ve16_common_206	chr1	6152647	6152855	+	0.01687	NA	Intergenic	Intergenic	-53446	ENSMUST00000159906.7	ENSMUSG00000025907	ENSMUST00000159656			Rb1cc1			protein_coding
e11ve16_common_207	chr1	6213923	6214202	+	2.47577	NA	promoter-TSS (ENSMUST00000027040.12)	protein_coding-promoter-TSS (ENSMUST00000027040.12)	528	ENSMUST00000159618.1	ENSMUSG00000090031	ENSMUST00000097832			4732440D04Rik			lncRNA
e11ve16_common_208	chr1	6215048	6215439	+	1.1971	NA	promoter-TSS (ENSMUST00000097832.1)	lncRNA-promoter-TSS (ENSMUST00000097832.1)	49	ENSMUST00000097832.1	ENSMUSG00000090031	ENSMUST00000097832			4732440D04Rik			lncRNA
e11ve16_common_209	chr1	6282411	6282849	+	1.02828	NA	Intergenic	Intergenic	11952	ENSMUST00000159656.1	ENSMUSG00000025907	ENSMUST00000159656			Rb1cc1			protein_coding
e11ve16_common_210	chr1	6286957	6287508	+	0.26252	NA	Intergenic	Intergenic	16554	ENSMUST00000159656.1	ENSMUSG00000025907	ENSMUST00000159656			Rb1cc1			protein_coding
e11ve16_common_211	chr1	6358752	6359623	+	1.01732	NA	promoter-TSS (ENSMUST00000133144.3)	protein_coding-promoter-TSS (ENSMUST00000133144.3)	-31	ENSMUST00000133144.3	ENSMUSG00000087247	ENSMUST00000133144			Alkal1			protein_coding
e11ve16_common_212	chr1	6382625	6383601	+	0.30184	NA	promoter-TSS (ENSMUST00000192950.1)	processed_pseudogene-promoter-TSS (ENSMUST00000192950.1)	-7	ENSMUST00000192950.1	ENSMUSG00000102706	ENSMUST00000192950			Gm7417			processed_pseudogene
e11ve16_common_213	chr1	6406263	6406891	+	0.09552	NA	Intergenic	Intergenic	-23471	ENSMUST00000192950.1	ENSMUSG00000102706	ENSMUST00000192950			Gm7417			processed_pseudogene
e11ve16_common_214	chr1	6440899	6441847	+	1.63613	NA	promoter-TSS (ENSMUST00000194240.1)	processed_pseudogene-promoter-TSS (ENSMUST00000194240.1)	-77	ENSMUST00000194240.1	ENSMUSG00000103845	ENSMUST00000194240			Gm19026			processed_pseudogene
e11ve16_common_215	chr1	6973824	6974411	+	0.32521	NA	Intergenic	Intergenic	-24100	ENSMUST00000193423.1	ENSMUSG00000102534	ENSMUST00000193423			Gm37225			processed_pseudogene
e11ve16_common_216	chr1	7088238	7088506	+	0.61406	NA	promoter-TSS (ENSMUST00000061280.16)	protein_coding-promoter-TSS (ENSMUST00000061280.16)	-548	ENSMUST00000061280.16	ENSMUSG00000051285	ENSMUST00000182675			Pcmtd1			protein_coding
e11ve16_common_217	chr1	7089353	7089680	+	0.78313	NA	intron (ENSMUST00000182823.1, intron 1 of 1)	protein_coding-intron (ENSMUST00000061280.16, intron 1 of 5)	350	ENSMUST00000182823.1	ENSMUSG00000051285	ENSMUST00000182675			Pcmtd1			protein_coding
e11ve16_common_218	chr1	7206080	7206337	+	0.736	NA	Intergenic	Intergenic	-16289	ENSMUST00000195269.1	ENSMUSG00000103709	ENSMUST00000195269			Nras-ps2			processed_pseudogene
e11ve16_common_219	chr1	7207017	7207220	+	0.95375	NA	Intergenic	Intergenic	-17199	ENSMUST00000195269.1	ENSMUSG00000103709	ENSMUST00000195269			Nras-ps2			processed_pseudogene
e11ve16_common_220	chr1	7397381	7397649	+	0.92957	NA	intron (ENSMUST00000193732.1, intron 1 of 4)	lncRNA-intron (ENSMUST00000181554.1, intron 1 of 2)	280	ENSMUST00000193106.5	ENSMUSG00000097797	ENSMUST00000193732			Gm26901			lncRNA
e11ve16_common_221	chr1	7398491	7398693	+	1.87743	NA	promoter-TSS (ENSMUST00000181554.1)	lncRNA-promoter-TSS (ENSMUST00000181554.1)	-723	ENSMUST00000193732.1	ENSMUSG00000097797	ENSMUST00000193732			Gm26901			lncRNA
e11ve16_common_222	chr1	7498741	7499562	+	0.80773	NA	intron (ENSMUST00000194886.1, intron 1 of 2)	lncRNA-intron (ENSMUST00000194886.1, intron 1 of 2)	1183	ENSMUST00000194886.1	ENSMUSG00000103067	ENSMUST00000194886			Gm30414			lncRNA
e11ve16_common_223	chr1	9544937	9546483	+	0.55925	NA	exon (ENSMUST00000072079.8, exon 1 of 1)	protein_coding-exon (ENSMUST00000072079.8, exon 1 of 1)	302	ENSMUST00000072079.8	ENSMUSG00000061024	ENSMUST00000072079			Rrs1			protein_coding
e11ve16_common_224	chr1	9638778	9639428	+	0.30881	NA	TTS (ENSMUST00000191209.1)	lncRNA-TTS (ENSMUST00000191209.1)	1479	ENSMUST00000191209.1	ENSMUSG00000099827	ENSMUST00000191209			Gm29520			lncRNA
e11ve16_common_225	chr1	9699697	9700245	+	0.72199	NA	promoter-TSS (ENSMUST00000115468.8)	protein_coding-promoter-TSS (ENSMUST00000115468.8)	53	ENSMUST00000115468.8	ENSMUSG00000025912	ENSMUST00000088658			Mybl1			protein_coding
e11ve16_common_226	chr1	9700777	9701118	+	1.29598	NA	promoter-TSS (ENSMUST00000088658.10)	protein_coding-promoter-TSS (ENSMUST00000088658.10)	-738	ENSMUST00000088658.10	ENSMUSG00000025912	ENSMUST00000088658			Mybl1			protein_coding
e11ve16_common_227	chr1	9747505	9747950	+	0.7028	NA	promoter-TSS (ENSMUST00000181358.7)	lncRNA-promoter-TSS (ENSMUST00000181358.7)	79	ENSMUST00000181821.7	ENSMUSG00000097893	ENSMUST00000207445			1700034P13Rik			lncRNA
e11ve16_common_228	chr1	9748574	9748844	+	1.01441	NA	promoter-TSS (ENSMUST00000057438.6)	protein_coding-promoter-TSS (ENSMUST00000057438.6)	83	ENSMUST00000209020.1	ENSMUSG00000097893	ENSMUST00000207445			1700034P13Rik			lncRNA
e11ve16_common_229	chr1	9755354	9755591	+	1.73599	NA	intron (ENSMUST00000181821.7, intron 2 of 3)	lncRNA-intron (ENSMUST00000181358.7, intron 2 of 6)	6846	ENSMUST00000209020.1	ENSMUSG00000097893	ENSMUST00000207445			1700034P13Rik			lncRNA
e11ve16_common_230	chr1	9773358	9773636	+	1.54126	NA	intron (ENSMUST00000181821.7, intron 2 of 3)	lncRNA-intron (ENSMUST00000181358.7, intron 2 of 6)	-10281	ENSMUST00000189322.1	ENSMUSG00000097893	ENSMUST00000207445			1700034P13Rik			lncRNA
e11ve16_common_231	chr1	9797800	9799093	+	0.2541	NA	intron (ENSMUST00000166384.7, intron 1 of 16)	protein_coding-intron (ENSMUST00000166384.7, intron 1 of 16)	238	ENSMUST00000188298.6	ENSMUSG00000025915	ENSMUST00000168907			Sgk3			protein_coding
e11ve16_common_232	chr1	9847713	9849003	+	0.48795	NA	promoter-TSS (ENSMUST00000097826.5)	protein_coding-promoter-TSS (ENSMUST00000097826.5)	37	ENSMUST00000188830.6	ENSMUSG00000025915	ENSMUST00000168907			Sgk3			protein_coding
e11ve16_common_233	chr1	9908345	9909083	+	0.38573	NA	promoter-TSS (ENSMUST00000052843.11)	protein_coding-promoter-TSS (ENSMUST00000052843.11)	44	ENSMUST00000140948.8	ENSMUSG00000046101	ENSMUST00000118098			Mcmdc2			protein_coding
e11ve16_common_234	chr1	9943646	9944572	+	0.34058	NA	promoter-TSS (ENSMUST00000182498.7)	lncRNA-promoter-TSS (ENSMUST00000182498.7)	-6	ENSMUST00000182498.7	ENSMUSG00000098234	ENSMUST00000182498			Snhg6			lncRNA
e11ve16_common_235	chr1	9967097	9968540	+	0.65886	NA	TTS (ENSMUST00000027049.9)	protein_coding-TTS (ENSMUST00000027049.9)	114	ENSMUST00000185184.1	ENSMUSG00000099032	ENSMUST00000097824			Tcf24			protein_coding
e11ve16_common_236	chr1	10008737	10009411	+	0.6211	NA	promoter-TSS (ENSMUST00000027049.9)	protein_coding-promoter-TSS (ENSMUST00000027049.9)	56	ENSMUST00000155163.1	ENSMUSG00000025916	ENSMUST00000176398			Ppp1r42			protein_coding
e11ve16_common_237	chr1	10037548	10038421	+	0.66759	NA	promoter-TSS (ENSMUST00000071087.11)	protein_coding-promoter-TSS (ENSMUST00000071087.11)	-3	ENSMUST00000190610.1	ENSMUSG00000056763	ENSMUST00000191012			Cspp1			protein_coding
e11ve16_common_238	chr1	10039175	10039731	+	0.3487	NA	promoter-TSS (ENSMUST00000118263.7)	protein_coding-promoter-TSS (ENSMUST00000118263.7)	-314	ENSMUST00000191521.6	ENSMUSG00000056763	ENSMUST00000191012			Cspp1			protein_coding
e11ve16_common_239	chr1	10170155	10170647	+	0.62105	NA	intron (ENSMUST00000088615.10, intron 21 of 37)	protein_coding-intron (ENSMUST00000088615.10, intron 21 of 37)	3862	ENSMUST00000157528.1	ENSMUSG00000088153	ENSMUST00000157528			Gm26348			misc_RNA
e11ve16_common_240	chr1	10232166	10232984	+	1.56709	NA	promoter-TSS (ENSMUST00000088615.10)	protein_coding-promoter-TSS (ENSMUST00000088615.10)	95	ENSMUST00000131556.1	ENSMUSG00000067851	ENSMUST00000128834			Arfgef1			protein_coding
e11ve16_common_241	chr1	10233406	10233655	+	2.17131	NA	promoter-TSS (ENSMUST00000088615.10)	protein_coding-promoter-TSS (ENSMUST00000088615.10)	-860	ENSMUST00000088615.10	ENSMUSG00000067851	ENSMUST00000128834			Arfgef1			protein_coding
e11ve16_common_242	chr1	10256879	10257697	+	0.97974	NA	Intergenic	Intergenic	-24618	ENSMUST00000088615.10	ENSMUSG00000067851	ENSMUST00000128834			Arfgef1			protein_coding
e11ve16_common_243	chr1	10284982	10285226	+	1.34339	NA	Intergenic	Intergenic	-52434	ENSMUST00000088615.10	ENSMUSG00000067851	ENSMUST00000128834			Arfgef1			protein_coding
e11ve16_common_244	chr1	10285536	10285986	+	1.37492	NA	Intergenic	Intergenic	-53091	ENSMUST00000088615.10	ENSMUSG00000067851	ENSMUST00000128834			Arfgef1			protein_coding
e11ve16_common_245	chr1	10300270	10301340	+	0.99928	NA	Intergenic	Intergenic	-68135	ENSMUST00000088615.10	ENSMUSG00000067851	ENSMUST00000128834			Arfgef1			protein_coding
e11ve16_common_246	chr1	10396999	10397217	+	1.5025	NA	intron (ENSMUST00000153695.7, intron 7 of 9)	protein_coding-intron (ENSMUST00000035577.6, intron 8 of 10)	54881	ENSMUST00000194845.1	ENSMUSG00000103810	ENSMUST00000194845			Gm38005			TEC
e11ve16_common_247	chr1	10719624	10720370	+	0.1793	NA	promoter-TSS (ENSMUST00000035577.6)	protein_coding-promoter-TSS (ENSMUST00000035577.6)	-52	ENSMUST00000035577.6	ENSMUSG00000042501	ENSMUST00000035577			Cpa6			protein_coding
e11ve16_common_248	chr1	10759495	10759817	+	0.08075	NA	Intergenic	Intergenic	24721	ENSMUST00000192705.1	ENSMUSG00000103448	ENSMUST00000192705			Gm37133			TEC
e11ve16_common_249	chr1	10849046	10849733	+	0.15642	NA	Intergenic	Intergenic	-19299	ENSMUST00000188013.1	ENSMUSG00000100648	ENSMUST00000188013			Gm28659			processed_pseudogene
e11ve16_common_250	chr1	10932321	10932548	+	0.36359	NA	Intergenic	Intergenic	10764	ENSMUST00000157960.1	ENSMUSG00000088585	ENSMUST00000157960			Gm22963			snoRNA
e11ve16_common_251	chr1	10993161	10993577	+	0.61563	NA	promoter-TSS (ENSMUST00000027056.11)	protein_coding-promoter-TSS (ENSMUST00000027056.11)	-96	ENSMUST00000027056.11	ENSMUSG00000048960	ENSMUST00000187694			Prex2			protein_coding
e11ve16_common_252	chr1	10993730	10994481	+	0.80204	NA	exon (ENSMUST00000190935.1, exon 1 of 1)	protein_coding-exon (ENSMUST00000190935.1, exon 1 of 1)	587	ENSMUST00000190935.1	ENSMUSG00000048960	ENSMUST00000187694			Prex2			protein_coding
e11ve16_common_253	chr1	11065396	11065604	+	1.90616	NA	intron (ENSMUST00000027056.11, intron 2 of 39)	protein_coding-intron (ENSMUST00000027056.11, intron 2 of 39)	-33030	ENSMUST00000189822.1	ENSMUSG00000048960	ENSMUST00000187694			Prex2			protein_coding
e11ve16_common_254	chr1	11329397	11330453	+	0.36939	NA	Intergenic	Intergenic	37039	ENSMUST00000193623.1	ENSMUSG00000103494	ENSMUST00000193623			Gm37410			TEC
e11ve16_common_255	chr1	11413634	11414856	+	1.0177	NA	promoter-TSS (ENSMUST00000135014.7)	protein_coding-promoter-TSS (ENSMUST00000135014.7)	-24	ENSMUST00000135014.7	ENSMUSG00000057715	ENSMUST00000137824			A830018L16Rik			protein_coding
e11ve16_common_256	chr1	11595304	11596025	+	0.06147	NA	intron (ENSMUST00000191437.1, intron 2 of 2)	protein_coding-intron (ENSMUST00000048613.13, intron 6 of 13)	12736	ENSMUST00000188880.1	ENSMUSG00000099845	ENSMUST00000188880			Gm29273			processed_pseudogene
e11ve16_common_257	chr1	12287662	12288661	+	0.08555	NA	Intergenic	Intergenic	-86775	ENSMUST00000179834.1	ENSMUSG00000093864	ENSMUST00000179834			Gm22633			snRNA
e11ve16_common_258	chr1	12295913	12296226	+	0.24918	NA	Intergenic	Intergenic	-78867	ENSMUST00000179834.1	ENSMUSG00000093864	ENSMUST00000179834			Gm22633			snRNA
e11ve16_common_259	chr1	12435252	12435466	+	0.51342	NA	Intergenic	Intergenic	9373	ENSMUST00000183490.1	ENSMUSG00000098555	ENSMUST00000183490			Mir6341			miRNA
e11ve16_common_260	chr1	12572213	12573313	+	0.19538	NA	Intergenic	Intergenic	7186	ENSMUST00000181461.1	ENSMUSG00000097628	ENSMUST00000181461			Gm2383			processed_pseudogene
e11ve16_common_261	chr1	12657536	12657838	+	1.45853	NA	Intergenic	Intergenic	1820	ENSMUST00000182390.1	ENSMUSG00000098163	ENSMUST00000182390			Gm6216			processed_pseudogene
e11ve16_common_262	chr1	12670342	12671066	+	0.5741	NA	exon (ENSMUST00000186962.1, exon 1 of 1)	lncRNA-exon (ENSMUST00000186962.1, exon 1 of 1)	472	ENSMUST00000186962.1	ENSMUSG00000101314	ENSMUST00000186962			Gm29663			lncRNA
e11ve16_common_263	chr1	12683876	12684358	+	0.03643	NA	Intergenic	Intergenic	-8160	ENSMUST00000177608.7	ENSMUSG00000016918	ENSMUST00000177608			Sulf1			protein_coding
e11ve16_common_264	chr1	12692863	12693233	+	1.83958	NA	intron (ENSMUST00000180062.7, intron 1 of 20)	protein_coding-intron (ENSMUST00000177608.7, intron 1 of 21)	516	ENSMUST00000186051.6	ENSMUSG00000016918	ENSMUST00000177608			Sulf1			protein_coding
e11ve16_common_265	chr1	12718085	12719029	+	1.3529	NA	promoter-TSS (ENSMUST00000088585.9)	protein_coding-promoter-TSS (ENSMUST00000088585.9)	28	ENSMUST00000088585.9	ENSMUSG00000016918	ENSMUST00000177608			Sulf1			protein_coding
e11ve16_common_266	chr1	12744707	12745226	+	0.97716	NA	intron (ENSMUST00000088585.9, intron 2 of 21)	protein_coding-intron (ENSMUST00000088585.9, intron 2 of 21)	16847	ENSMUST00000186405.6	ENSMUSG00000016918	ENSMUST00000177608			Sulf1			protein_coding
e11ve16_common_267	chr1	12835628	12836303	+	0.39067	NA	promoter-TSS (ENSMUST00000189447.1)	protein_coding-promoter-TSS (ENSMUST00000189447.1)	-63	ENSMUST00000189447.1	ENSMUSG00000016918	ENSMUST00000177608			Sulf1			protein_coding
e11ve16_common_268	chr1	12863979	12864743	+	0.14854	NA	Intergenic	Intergenic	21570	ENSMUST00000185780.1	ENSMUSG00000016918	ENSMUST00000177608			Sulf1			protein_coding
e11ve16_common_269	chr1	12865049	12865322	+	0.07889	NA	Intergenic	Intergenic	22394	ENSMUST00000185780.1	ENSMUSG00000016918	ENSMUST00000177608			Sulf1			protein_coding
e11ve16_common_270	chr1	12875437	12876139	+	1.09123	NA	intron (ENSMUST00000115402.7, intron 7 of 7)	protein_coding-intron (ENSMUST00000115402.7, intron 7 of 7)	32997	ENSMUST00000185780.1	ENSMUSG00000016918	ENSMUST00000177608			Sulf1			protein_coding
e11ve16_common_271	chr1	13050343	13050621	+	0.06384	NA	Intergenic	Intergenic	9469	ENSMUST00000191708.1	ENSMUSG00000104518	ENSMUST00000191708			Gm37162			TEC
e11ve16_common_272	chr1	13103619	13104343	+	0.40567	NA	Intergenic	Intergenic	23182	ENSMUST00000047577.6	ENSMUSG00000042414	ENSMUST00000047577			Prdm14			protein_coding
e11ve16_common_273	chr1	13151344	13151581	+	0.18461	NA	promoter-TSS (ENSMUST00000133232.1)	protein_coding-promoter-TSS (ENSMUST00000133232.1)	-444	ENSMUST00000133232.1	ENSMUSG00000005886	ENSMUST00000133232			Ncoa2			protein_coding
e11ve16_common_274	chr1	13266769	13266980	+	1.56112	NA	intron (ENSMUST00000145280.1, intron 1 of 3)	protein_coding-intron (ENSMUST00000006037.12, intron 2 of 22)	4676	ENSMUST00000183805.1	ENSMUSG00000099183	ENSMUST00000183805			Gm27881			miRNA
e11ve16_common_275	chr1	13277940	13278674	+	0.46995	NA	intron (ENSMUST00000145280.1, intron 1 of 3)	protein_coding-intron (ENSMUST00000006037.12, intron 2 of 22)	12199	ENSMUST00000194484.1	ENSMUSG00000102639	ENSMUST00000194484			Gm38223			TEC
e11ve16_common_276	chr1	13291027	13291820	+	0.31088	NA	promoter-TSS (ENSMUST00000194484.1)	TEC-promoter-TSS (ENSMUST00000194484.1)	-917	ENSMUST00000194484.1	ENSMUSG00000102639	ENSMUST00000194484			Gm38223			TEC
e11ve16_common_277	chr1	13300381	13301546	+	0.4665	NA	intron (ENSMUST00000143603.7, intron 1 of 12)	protein_coding-intron (ENSMUST00000143603.7, intron 1 of 12)	-1241	ENSMUST00000145280.1	ENSMUSG00000005886	ENSMUST00000133232			Ncoa2			protein_coding
e11ve16_common_278	chr1	13314015	13314843	+	0.59314	NA	intron (ENSMUST00000143603.7, intron 1 of 12)	protein_coding-intron (ENSMUST00000143603.7, intron 1 of 12)	-14707	ENSMUST00000145280.1	ENSMUSG00000005886	ENSMUST00000133232			Ncoa2			protein_coding
e11ve16_common_279	chr1	13364408	13365169	+	1.81407	NA	intron (ENSMUST00000143603.7, intron 1 of 12)	protein_coding-intron (ENSMUST00000006037.12, intron 1 of 22)	7641	ENSMUST00000139970.7	ENSMUSG00000005886	ENSMUST00000133232			Ncoa2			protein_coding
e11ve16_common_280	chr1	13372185	13372437	+	1.48321	NA	exon (ENSMUST00000081713.10, exon 1 of 22)	protein_coding-exon (ENSMUST00000081713.10, exon 1 of 22)	118	ENSMUST00000139970.7	ENSMUSG00000005886	ENSMUST00000133232			Ncoa2			protein_coding
e11ve16_common_281	chr1	13373072	13374508	+	0.33586	NA	intron (ENSMUST00000143603.7, intron 1 of 12)	protein_coding-intron (ENSMUST00000006037.12, intron 1 of 22)	239	ENSMUST00000143603.7	ENSMUSG00000005886	ENSMUST00000133232			Ncoa2			protein_coding
e11ve16_common_282	chr1	13426300	13427259	+	0.49567	NA	Intergenic	Intergenic	-19124	ENSMUST00000187246.1	ENSMUSG00000101171	ENSMUST00000187246			Gm7593			processed_pseudogene
e11ve16_common_283	chr1	13496103	13496846	+	0.30423	NA	Intergenic	Intergenic	83324	ENSMUST00000185447.1	ENSMUSG00000025935	ENSMUST00000188377			Tram1			protein_coding
e11ve16_common_284	chr1	13561417	13562080	+	0.04115	NA	Intergenic	Intergenic	18050	ENSMUST00000185447.1	ENSMUSG00000025935	ENSMUST00000188377			Tram1			protein_coding
e11ve16_common_285	chr1	13589067	13589287	+	0.77574	NA	intron (ENSMUST00000188377.1, intron 1 of 3)	protein_coding-intron (ENSMUST00000027068.10, intron 1 of 10)	698	ENSMUST00000188377.1	ENSMUSG00000025935	ENSMUST00000188377			Tram1			protein_coding
e11ve16_common_286	chr1	13589416	13590346	+	0.87635	NA	promoter-TSS (ENSMUST00000027068.10)	protein_coding-promoter-TSS (ENSMUST00000027068.10)	-6	ENSMUST00000188377.1	ENSMUSG00000025935	ENSMUST00000188377			Tram1			protein_coding
e11ve16_common_287	chr1	13598997	13600078	+	0.95645	NA	Intergenic	Intergenic	-9627	ENSMUST00000027068.10	ENSMUSG00000025935	ENSMUST00000188377			Tram1			protein_coding
e11ve16_common_288	chr1	13621789	13622338	+	0.31635	NA	Intergenic	Intergenic	16348	ENSMUST00000156222.1	ENSMUSG00000025937	ENSMUST00000156222			Lactb2			protein_coding
e11ve16_common_289	chr1	13659681	13660008	+	1.25533	NA	intron (ENSMUST00000027071.6, intron 1 of 6)	protein_coding-intron (ENSMUST00000027071.6, intron 1 of 6)	702	ENSMUST00000027071.6	ENSMUSG00000025937	ENSMUST00000156222			Lactb2			protein_coding
e11ve16_common_290	chr1	13771383	13772093	+	0.47185	NA	Intergenic	Intergenic	2726	ENSMUST00000104180.1	ENSMUSG00000077368	ENSMUST00000104180			Gm26273			snoRNA
e11ve16_common_291	chr1	13789363	13789657	+	0.25042	NA	Intergenic	Intergenic	-2631	ENSMUST00000180415.1	ENSMUSG00000097711	ENSMUST00000180415			Gm5523			processed_pseudogene
e11ve16_common_292	chr1	14027110	14027322	+	0.05178	NA	Intergenic	Intergenic	85603	ENSMUST00000193148.1	ENSMUSG00000104209	ENSMUST00000193148			Gm37400			TEC
e11ve16_common_293	chr1	14139948	14140402	+	0.16297	NA	Intergenic	Intergenic	-27356	ENSMUST00000193148.1	ENSMUSG00000104209	ENSMUST00000193148			Gm37400			TEC
e11ve16_common_294	chr1	14150387	14150967	+	0.77984	NA	Intergenic	Intergenic	-31901	ENSMUST00000179783.1	ENSMUSG00000095853	ENSMUST00000179783			Gm22616			miRNA
e11ve16_common_295	chr1	14151237	14151612	+	1.05842	NA	Intergenic	Intergenic	-31154	ENSMUST00000179783.1	ENSMUSG00000095853	ENSMUST00000179783			Gm22616			miRNA
e11ve16_common_296	chr1	14181388	14182172	+	0.74616	NA	promoter-TSS (ENSMUST00000179783.1)	miRNA-promoter-TSS (ENSMUST00000179783.1)	-798	ENSMUST00000179783.1	ENSMUSG00000095853	ENSMUST00000179783			Gm22616			miRNA
e11ve16_common_297	chr1	14309432	14310182	+	1.56445	NA	promoter-TSS (ENSMUST00000187790.1)	protein_coding-promoter-TSS (ENSMUST00000187790.1)	29	ENSMUST00000187790.1	ENSMUSG00000025932	ENSMUST00000185453			Eya1			protein_coding
e11ve16_common_298	chr1	14506319	14507469	+	0.32995	NA	Intergenic	Intergenic	-196659	ENSMUST00000168081.8	ENSMUSG00000025932	ENSMUST00000185453			Eya1			protein_coding
e11ve16_common_299	chr1	14755157	14756435	+	0.17356	NA	promoter-TSS (ENSMUST00000190719.1)	protein_coding-promoter-TSS (ENSMUST00000190719.1)	194	ENSMUST00000027062.6	ENSMUSG00000025930	ENSMUST00000027062			Msc			protein_coding
e11ve16_common_300	chr1	14800244	14801076	+	0.40338	NA	Intergenic	Intergenic	12015	ENSMUST00000194866.1	ENSMUSG00000103492	ENSMUST00000194866			Gm37412			TEC
e11ve16_common_301	chr1	14823441	14823884	+	0.51331	NA	Intergenic	Intergenic	16494	ENSMUST00000121569.1	ENSMUSG00000081201	ENSMUST00000121569			Smt3h2-ps4			processed_pseudogene
e11ve16_common_302	chr1	14918220	14919369	+	0.2	NA	promoter-TSS (ENSMUST00000041447.4)	protein_coding-promoter-TSS (ENSMUST00000041447.4)	41	ENSMUST00000235071.1	ENSMUSG00000032769	ENSMUST00000235071			Trpa1			protein_coding
e11ve16_common_303	chr1	15144483	15144732	+	1.14517	NA	Intergenic	Intergenic	125190	ENSMUST00000086739.5	ENSMUSG00000073737	ENSMUST00000086739			Gm10566			processed_pseudogene
e11ve16_common_304	chr1	15286216	15286685	+	0.36113	NA	promoter-TSS (ENSMUST00000175681.2)	protein_coding-promoter-TSS (ENSMUST00000175681.2)	-804	ENSMUST00000175681.2	ENSMUSG00000092083	ENSMUST00000175681			Kcnb2			protein_coding
e11ve16_common_305	chr1	15286953	15287523	+	0.72737	NA	promoter-TSS (ENSMUST00000175681.2)	protein_coding-promoter-TSS (ENSMUST00000175681.2)	-16	ENSMUST00000175681.2	ENSMUSG00000092083	ENSMUST00000175681			Kcnb2			protein_coding
e11ve16_common_306	chr1	15446663	15446911	+	1.84755	NA	intron (ENSMUST00000175681.2, intron 2 of 2)	protein_coding-intron (ENSMUST00000170146.2, intron 1 of 1)	82485	ENSMUST00000193873.1	ENSMUSG00000102937	ENSMUST00000193873			Gm38116			TEC
e11ve16_common_307	chr1	15455602	15456547	+	0.4642	NA	intron (ENSMUST00000175681.2, intron 2 of 2)	protein_coding-intron (ENSMUST00000170146.2, intron 1 of 1)	91772	ENSMUST00000193873.1	ENSMUSG00000102937	ENSMUST00000193873			Gm38116			TEC
e11ve16_common_308	chr1	15652303	15652558	+	0.23667	NA	intron (ENSMUST00000175681.2, intron 2 of 2)	protein_coding-intron (ENSMUST00000170146.2, intron 1 of 1)	33616	ENSMUST00000158204.1	ENSMUSG00000088829	ENSMUST00000158204			Gm25227			snoRNA
e11ve16_common_309	chr1	15771120	15771440	+	0.1731	NA	Intergenic	Intergenic	10519	ENSMUST00000188400.1	ENSMUSG00000100814	ENSMUST00000188400			Gm28669			processed_pseudogene
e11ve16_common_310	chr1	15791583	15792160	+	1.07293	NA	Intergenic	Intergenic	-13775	ENSMUST00000188371.6	ENSMUSG00000025925	ENSMUST00000027057			Terf1			protein_coding
e11ve16_common_311	chr1	15805237	15805503	+	1.36827	NA	promoter-TSS (ENSMUST00000027057.7)	protein_coding-promoter-TSS (ENSMUST00000027057.7)	-276	ENSMUST00000188371.6	ENSMUSG00000025925	ENSMUST00000027057			Terf1			protein_coding
e11ve16_common_312	chr1	15806247	15806489	+	0.84249	NA	intron (ENSMUST00000027057.7, intron 1 of 8)	protein_coding-intron (ENSMUST00000027057.7, intron 1 of 8)	704	ENSMUST00000027057.7	ENSMUSG00000025925	ENSMUST00000027057			Terf1			protein_coding
e11ve16_common_313	chr1	15892277	15893089	+	0.87674	NA	promoter-TSS (ENSMUST00000040695.4)	protein_coding-promoter-TSS (ENSMUST00000040695.4)	39	ENSMUST00000040695.4	ENSMUSG00000032719	ENSMUST00000040695			Sbspon			protein_coding
e11ve16_common_314	chr1	15902345	15902575	+	0.47269	NA	Intergenic	Intergenic	-9738	ENSMUST00000040695.4	ENSMUSG00000032719	ENSMUST00000040695			Sbspon			protein_coding
e11ve16_common_315	chr1	16072478	16072924	+	0.20206	NA	intron (ENSMUST00000145070.7, intron 4 of 5)	protein_coding-intron (ENSMUST00000115367.7, intron 2 of 3)	8511	ENSMUST00000115367.7	ENSMUSG00000067795	ENSMUST00000115367			4930444P10Rik			protein_coding
e11ve16_common_316	chr1	16073064	16074191	+	0.3133	NA	intron (ENSMUST00000145070.7, intron 4 of 5)	protein_coding-intron (ENSMUST00000115367.7, intron 2 of 3)	7585	ENSMUST00000115367.7	ENSMUSG00000067795	ENSMUST00000115367			4930444P10Rik			protein_coding
e11ve16_common_317	chr1	16092754	16093619	+	0.44049	NA	exon (ENSMUST00000145070.7, exon 1 of 6)	protein_coding-exon (ENSMUST00000145070.7, exon 1 of 6)	139	ENSMUST00000151004.1	ENSMUSG00000067795	ENSMUST00000115367			4930444P10Rik			protein_coding
e11ve16_common_318	chr1	16104172	16104776	+	1.4258	NA	promoter-TSS (ENSMUST00000125005.1)	protein_coding-promoter-TSS (ENSMUST00000125005.1)	-72	ENSMUST00000141217.1	ENSMUSG00000043716	ENSMUST00000140597			Rpl7			protein_coding
e11ve16_common_319	chr1	16106109	16106314	+	1.0973	NA	exon (ENSMUST00000027053.7, exon 1 of 6)	protein_coding-exon (ENSMUST00000027053.7, exon 1 of 6)	437	ENSMUST00000027053.7	ENSMUSG00000025921	ENSMUST00000152626			Rdh10			protein_coding
e11ve16_common_320	chr1	16116024	16116354	+	0.11597	NA	intron (ENSMUST00000027053.7, intron 2 of 5)	protein_coding-intron (ENSMUST00000027053.7, intron 2 of 5)	10415	ENSMUST00000027053.7	ENSMUSG00000025921	ENSMUST00000152626			Rdh10			protein_coding
e11ve16_common_321	chr1	16152686	16152993	+	1.02684	NA	Intergenic	Intergenic	22337	ENSMUST00000152626.1	ENSMUSG00000025921	ENSMUST00000152626			Rdh10			protein_coding
e11ve16_common_322	chr1	16228066	16228341	+	1.38077	NA	promoter-TSS (ENSMUST00000186343.1)	lncRNA-promoter-TSS (ENSMUST00000186343.1)	-303	ENSMUST00000186343.1	ENSMUSG00000100868	ENSMUST00000186343			Gm28095			lncRNA
e11ve16_common_323	chr1	16265127	16265480	+	0.79838	NA	intron (ENSMUST00000160446.7, intron 3 of 3)	protein_coding-intron (ENSMUST00000027052.12, intron 11 of 12)	11674	ENSMUST00000159190.1	ENSMUSG00000089982	ENSMUST00000160446			Gm7568			lncRNA
e11ve16_common_324	chr1	16265587	16265899	+	0.30599	NA	intron (ENSMUST00000160446.7, intron 3 of 3)	protein_coding-intron (ENSMUST00000027052.12, intron 11 of 12)	12114	ENSMUST00000159190.1	ENSMUSG00000089982	ENSMUST00000160446			Gm7568			lncRNA
e11ve16_common_325	chr1	16279525	16279921	+	1.19092	NA	intron (ENSMUST00000162627.7, intron 12 of 13)	protein_coding-intron (ENSMUST00000027052.12, intron 11 of 12)	26094	ENSMUST00000159190.1	ENSMUSG00000089982	ENSMUST00000160446			Gm7568			lncRNA
e11ve16_common_326	chr1	16518570	16519209	+	0.82732	NA	intron (ENSMUST00000162627.7, intron 1 of 13)	protein_coding-intron (ENSMUST00000162627.7, intron 1 of 13)	322	ENSMUST00000159558.7	ENSMUSG00000025920	ENSMUST00000054668			Stau2			protein_coding
e11ve16_common_327	chr1	16519778	16520166	+	0.35064	NA	promoter-TSS (ENSMUST00000027052.12)	protein_coding-promoter-TSS (ENSMUST00000027052.12)	48	ENSMUST00000144138.3	ENSMUSG00000025920	ENSMUST00000054668			Stau2			protein_coding
e11ve16_common_328	chr1	16618293	16619703	+	1.00746	NA	exon (ENSMUST00000195710.1, exon 1 of 1)	TEC-exon (ENSMUST00000195710.1, exon 1 of 1)	261	ENSMUST00000133639.1	ENSMUSG00000025939	ENSMUST00000133639			Ube2w			protein_coding
e11ve16_common_329	chr1	16656356	16656997	+	1.16526	NA	promoter-TSS (ENSMUST00000181371.1)	lncRNA-promoter-TSS (ENSMUST00000181371.1)	-51	ENSMUST00000186701.1	ENSMUSG00000079658	ENSMUST00000188987			Eloc			protein_coding
e11ve16_common_330	chr1	16664933	16665983	+	0.37376	NA	exon (ENSMUST00000065373.5, exon 1 of 3)	protein_coding-exon (ENSMUST00000065373.5, exon 1 of 3)	222	ENSMUST00000176451.1	ENSMUSG00000025940	ENSMUST00000065373			Tmem70			protein_coding
e11ve16_common_331	chr1	16688001	16689142	+	0.70696	NA	promoter-TSS (ENSMUST00000190366.1)	protein_coding-promoter-TSS (ENSMUST00000190366.1)	63	ENSMUST00000190366.1	ENSMUSG00000025779	ENSMUST00000026881			Ly96			protein_coding
e11ve16_common_332	chr1	16798146	16798762	+	0.36404	NA	Intergenic	Intergenic	-28316	ENSMUST00000071842.9	ENSMUSG00000091020	ENSMUST00000071842			Gm5828			processed_pseudogene
e11ve16_common_333	chr1	16824564	16824933	+	1.20091	NA	Intergenic	Intergenic	-54610	ENSMUST00000071842.9	ENSMUSG00000091020	ENSMUST00000071842			Gm5828			processed_pseudogene
e11ve16_common_334	chr1	17096801	17097455	+	0.57268	NA	intron (ENSMUST00000038382.4, intron 1 of 4)	protein_coding-intron (ENSMUST00000038382.4, intron 1 of 4)	761	ENSMUST00000038382.4	ENSMUSG00000042686	ENSMUST00000186024			Jph1			protein_coding
e11ve16_common_335	chr1	17098102	17098725	+	0.61443	NA	promoter-TSS (ENSMUST00000038382.4)	protein_coding-promoter-TSS (ENSMUST00000038382.4)	-524	ENSMUST00000038382.4	ENSMUSG00000042686	ENSMUST00000186024			Jph1			protein_coding
e11ve16_common_336	chr1	17122966	17123387	+	1.60628	NA	Intergenic	Intergenic	-1571	ENSMUST00000188872.1	ENSMUSG00000100110	ENSMUST00000188872			Gm28783			lncRNA
e11ve16_common_337	chr1	17123495	17123936	+	1.32927	NA	Intergenic	Intergenic	-1032	ENSMUST00000188872.1	ENSMUSG00000100110	ENSMUST00000188872			Gm28783			lncRNA
e11ve16_common_338	chr1	17145587	17145836	+	1.06105	NA	intron (ENSMUST00000150457.1, intron 1 of 2)	protein_coding-intron (ENSMUST00000026879.7, intron 1 of 5)	243	ENSMUST00000189736.1	ENSMUSG00000025777	ENSMUST00000026879			Gdap1			protein_coding
e11ve16_common_339	chr1	17163671	17163946	+	0.07162	NA	exon (ENSMUST00000026879.7, exon 6 of 6)	protein_coding-exon (ENSMUST00000026879.7, exon 6 of 6)	-4595	ENSMUST00000187817.1	ENSMUSG00000099899	ENSMUST00000187817			Gm28784			lncRNA
e11ve16_common_340	chr1	17506518	17507335	+	1.24062	NA	Intergenic	Intergenic	-13075	ENSMUST00000158909.1	ENSMUSG00000089534	ENSMUST00000158909			Gm25166			snoRNA
e11ve16_common_341	chr1	17726964	17727209	+	2.47572	NA	promoter-TSS (ENSMUST00000095075.4)	protein_coding-promoter-TSS (ENSMUST00000095075.4)	-2	ENSMUST00000095075.4	ENSMUSG00000025776	ENSMUST00000095075			Crispld1			protein_coding
e11ve16_common_342	chr1	18106601	18106915	+	2.54104	NA	Intergenic	Intergenic	30293	ENSMUST00000115340.7	ENSMUSG00000025774	ENSMUST00000026876			Crisp4			protein_coding
e11ve16_common_343	chr1	18976945	18977153	+	0.00506	NA	Intergenic	Intergenic	-7216	ENSMUST00000158175.1	ENSMUSG00000088800	ENSMUST00000158175			Gm24075			snoRNA
e11ve16_common_344	chr1	19178976	19179604	+	0.23171	NA	Intergenic	Intergenic	-25324	ENSMUST00000162030.1	ENSMUSG00000100720	ENSMUST00000162030			Gm10075			processed_pseudogene
e11ve16_common_345	chr1	19205811	19206418	+	0.32085	NA	Intergenic	Intergenic	-2800	ENSMUST00000027059.10	ENSMUSG00000025927	ENSMUST00000186972			Tfap2b			protein_coding
e11ve16_common_346	chr1	19210069	19210487	+	1.29647	NA	intron (ENSMUST00000187754.6, intron 1 of 7)	protein_coding-intron (ENSMUST00000027059.10, intron 1 of 6)	1318	ENSMUST00000187754.6	ENSMUSG00000025927	ENSMUST00000186972			Tfap2b			protein_coding
e11ve16_common_347	chr1	19241565	19242152	+	1.47858	NA	promoter-TSS (ENSMUST00000189218.1)	lncRNA-promoter-TSS (ENSMUST00000189218.1)	-867	ENSMUST00000189218.1	ENSMUSG00000100538	ENSMUST00000189218			Gm28340			lncRNA
e11ve16_common_348	chr1	19321278	19322453	+	0.69513	NA	Intergenic	Intergenic	-1168	ENSMUST00000190883.1	ENSMUSG00000101117	ENSMUST00000190883			Gm28341			processed_pseudogene
e11ve16_common_349	chr1	19473154	19474230	+	0.39898	NA	Intergenic	Intergenic	40227	ENSMUST00000122719.1	ENSMUSG00000084668	ENSMUST00000122719			Gm24633			snoRNA
e11ve16_common_350	chr1	20311652	20311925	+	0.28107	NA	intron (ENSMUST00000088448.11, intron 49 of 66)	protein_coding-intron (ENSMUST00000088448.11, intron 49 of 66)	-44664	ENSMUST00000161509.2	ENSMUSG00000089914	ENSMUST00000161509			4930486I03Rik			lncRNA
e11ve16_common_351	chr1	20477515	20478421	+	1.04381	NA	intron (ENSMUST00000088448.11, intron 35 of 66)	protein_coding-intron (ENSMUST00000088448.11, intron 35 of 66)	-33056	ENSMUST00000093665.1	ENSMUSG00000070175	ENSMUST00000093665			Gm24162			snRNA
e11ve16_common_352	chr1	20554331	20554852	+	0.13233	NA	intron (ENSMUST00000088448.11, intron 22 of 66)	protein_coding-intron (ENSMUST00000088448.11, intron 22 of 66)	63449	ENSMUST00000128051.1	ENSMUSG00000043760	ENSMUST00000132647			Pkhd1			protein_coding
e11ve16_common_353	chr1	20617470	20618261	+	1.35725	NA	intron (ENSMUST00000088448.11, intron 1 of 66)	protein_coding-intron (ENSMUST00000088448.11, intron 1 of 66)	175	ENSMUST00000128051.1	ENSMUSG00000043760	ENSMUST00000132647			Pkhd1			protein_coding
e11ve16_common_354	chr1	20653972	20655050	+	0.76813	NA	Intergenic	Intergenic	-15371	ENSMUST00000227082.1	ENSMUSG00000099906	ENSMUST00000185494			Gm28653			lncRNA
e11ve16_common_355	chr1	20819646	20820716	+	0.50522	NA	promoter-TSS (ENSMUST00000185296.1)	protein_coding-promoter-TSS (ENSMUST00000185296.1)	79	ENSMUST00000185296.1	ENSMUSG00000041859	ENSMUST00000190421			Mcm3			protein_coding
e11ve16_common_356	chr1	20890145	20890592	+	0.70913	NA	promoter-TSS (ENSMUST00000189400.6)	protein_coding-promoter-TSS (ENSMUST00000189400.6)	105	ENSMUST00000181654.1	ENSMUSG00000097934	ENSMUST00000181654			6720483E21Rik			lncRNA
e11ve16_common_357	chr1	20890881	20891565	+	0.66753	NA	promoter-TSS (ENSMUST00000181654.1)	lncRNA-promoter-TSS (ENSMUST00000181654.1)	617	ENSMUST00000189400.6	ENSMUSG00000025931	ENSMUST00000189400			Paqr8			protein_coding
e11ve16_common_358	chr1	20939259	20940629	+	0.56055	NA	TTS (ENSMUST00000068880.13)	protein_coding-TTS (ENSMUST00000068880.13)	-5767	ENSMUST00000185639.1	ENSMUSG00000100929	ENSMUST00000185639			Gm28064			processed_pseudogene
e11ve16_common_359	chr1	20951080	20952122	+	0.37871	NA	promoter-TSS (ENSMUST00000038447.5)	protein_coding-promoter-TSS (ENSMUST00000038447.5)	-25	ENSMUST00000160782.1	ENSMUSG00000041809	ENSMUST00000160782			Efhc1			protein_coding
e11ve16_common_360	chr1	21051460	21051678	+	2.20022	NA	intron (ENSMUST00000037998.5, intron 1 of 10)	protein_coding-intron (ENSMUST00000037998.5, intron 1 of 10)	-7913	ENSMUST00000187210.1	ENSMUSG00000041779	ENSMUST00000037998			Tram2			protein_coding
e11ve16_common_361	chr1	21052744	21052972	+	1.17344	NA	intron (ENSMUST00000037998.5, intron 1 of 10)	protein_coding-intron (ENSMUST00000037998.5, intron 1 of 10)	-9202	ENSMUST00000187210.1	ENSMUSG00000041779	ENSMUST00000037998			Tram2			protein_coding
e11ve16_common_362	chr1	21078622	21079819	+	0.92237	NA	promoter-TSS (ENSMUST00000037998.5)	protein_coding-promoter-TSS (ENSMUST00000037998.5)	9	ENSMUST00000037998.5	ENSMUSG00000041779	ENSMUST00000037998			Tram2			protein_coding
e11ve16_common_363	chr1	21166121	21167171	+	1.2556	NA	Intergenic	Intergenic	-12342	ENSMUST00000189119.1	ENSMUSG00000100819	ENSMUST00000189119			Gm2693			unprocessed_pseudogene
e11ve16_common_364	chr1	21218382	21219458	+	1.00095	NA	intron (ENSMUST00000027065.11, intron 1 of 4)	protein_coding-intron (ENSMUST00000027064.7, intron 1 of 4)	258	ENSMUST00000027064.7	ENSMUSG00000025933	ENSMUST00000027064			Tmem14a			protein_coding
e11ve16_common_365	chr1	21231919	21232236	+	0.02126	NA	Intergenic	Intergenic	-2645	ENSMUST00000191648.1	ENSMUSG00000102633	ENSMUST00000191648			Gm38224			TEC
e11ve16_common_366	chr1	21252584	21253055	+	1.44768	NA	promoter-TSS (ENSMUST00000190711.1)	protein_coding-promoter-TSS (ENSMUST00000190711.1)	-702	ENSMUST00000190711.1	ENSMUSG00000025934	ENSMUST00000027067			Gsta3			protein_coding
e11ve16_common_367	chr1	21271234	21271626	+	0.36298	NA	promoter-TSS (ENSMUST00000178379.2)	unprocessed_pseudogene-promoter-TSS (ENSMUST00000178379.2)	163	ENSMUST00000185842.1	ENSMUSG00000099343	ENSMUST00000185842			Gm28836			lncRNA
e11ve16_common_368	chr1	21271869	21272364	+	1.46084	NA	promoter-TSS (ENSMUST00000178379.2)	unprocessed_pseudogene-promoter-TSS (ENSMUST00000178379.2)	-287	ENSMUST00000178379.2	ENSMUSG00000096375	ENSMUST00000178379			Gm7094			unprocessed_pseudogene
e11ve16_common_369	chr1	21411185	21411804	+	0.36335	NA	intron (ENSMUST00000173058.7, intron 9 of 11)	protein_coding-intron (ENSMUST00000029667.12, intron 11 of 13)	20588	ENSMUST00000126985.2	ENSMUSG00000085679	ENSMUST00000126985			Gm16328			processed_pseudogene
e11ve16_common_370	chr1	21499965	21500315	+	0.18256	NA	intron (ENSMUST00000173058.7, intron 5 of 11)	protein_coding-intron (ENSMUST00000029667.12, intron 5 of 13)	12916	ENSMUST00000119064.1	ENSMUSG00000082935	ENSMUST00000119064			Gm7658			processed_pseudogene
e11ve16_common_371	chr1	21855713	21856342	+	0.08541	NA	promoter-TSS (ENSMUST00000134505.1)	protein_coding-promoter-TSS (ENSMUST00000134505.1)	-125	ENSMUST00000134505.1	ENSMUSG00000028033	ENSMUST00000115300			Kcnq5			protein_coding
e11ve16_common_372	chr1	21960382	21962286	+	0.8015	NA	exon (ENSMUST00000029667.12, exon 1 of 14)	protein_coding-exon (ENSMUST00000029667.12, exon 1 of 14)	247	ENSMUST00000173404.1	ENSMUSG00000028033	ENSMUST00000115300			Kcnq5			protein_coding
e11ve16_common_373	chr1	22090962	22091720	+	0.35807	NA	Intergenic	Intergenic	-60726	ENSMUST00000189850.1	ENSMUSG00000099692	ENSMUST00000189850			Gm5696			processed_pseudogene
e11ve16_common_374	chr1	22206554	22207484	+	0.40594	NA	Intergenic	Intergenic	-30830	ENSMUST00000190225.1	ENSMUSG00000100418	ENSMUST00000190225			Gm28239			processed_pseudogene
e11ve16_common_375	chr1	22268750	22269134	+	0.31112	NA	Intergenic	Intergenic	31093	ENSMUST00000190225.1	ENSMUSG00000100418	ENSMUST00000190225			Gm28239			processed_pseudogene
e11ve16_common_376	chr1	22533460	22533931	+	2.46587	NA	TTS (ENSMUST00000218140.1)	protein_coding-TTS (ENSMUST00000218140.1)	-21166	ENSMUST00000239255.1	ENSMUSG00000041670	ENSMUST00000239339			Rims1			protein_coding
e11ve16_common_377	chr1	22805811	22806566	+	1.37723	NA	promoter-TSS (ENSMUST00000081544.12)	protein_coding-promoter-TSS (ENSMUST00000081544.12)	-194	ENSMUST00000218140.1	ENSMUSG00000041670	ENSMUST00000239339			Rims1			protein_coding
e11ve16_common_378	chr1	23058693	23058908	+	0.36673	NA	intron (ENSMUST00000191045.1, intron 3 of 3)	lncRNA-intron (ENSMUST00000191045.1, intron 3 of 3)	43453	ENSMUST00000073179.5	ENSMUSG00000073730	ENSMUST00000073179			Ppp1r14bl			protein_coding
e11ve16_common_379	chr1	23061874	23062465	+	0.5051	NA	intron (ENSMUST00000191045.1, intron 3 of 3)	lncRNA-intron (ENSMUST00000191045.1, intron 3 of 3)	40084	ENSMUST00000073179.5	ENSMUSG00000073730	ENSMUST00000073179			Ppp1r14bl			protein_coding
e11ve16_common_380	chr1	23084543	23084867	+	0.26756	NA	intron (ENSMUST00000191045.1, intron 3 of 3)	lncRNA-intron (ENSMUST00000191045.1, intron 3 of 3)	17548	ENSMUST00000073179.5	ENSMUSG00000073730	ENSMUST00000073179			Ppp1r14bl			protein_coding
e11ve16_common_381	chr1	23114218	23114845	+	1.17779	NA	intron (ENSMUST00000191045.1, intron 3 of 3)	lncRNA-intron (ENSMUST00000191045.1, intron 3 of 3)	-12278	ENSMUST00000073179.5	ENSMUSG00000073730	ENSMUST00000073179			Ppp1r14bl			protein_coding
e11ve16_common_382	chr1	23117356	23117625	+	0.32838	NA	intron (ENSMUST00000191045.1, intron 3 of 3)	lncRNA-intron (ENSMUST00000191045.1, intron 3 of 3)	-15237	ENSMUST00000073179.5	ENSMUSG00000073730	ENSMUST00000073179			Ppp1r14bl			protein_coding
e11ve16_common_383	chr1	23187814	23188041	+	0.37837	NA	intron (ENSMUST00000191045.1, intron 2 of 3)	lncRNA-intron (ENSMUST00000191045.1, intron 2 of 3)	47746	ENSMUST00000191045.1	ENSMUSG00000101227	ENSMUST00000191045			Gm29506			lncRNA
e11ve16_common_384	chr1	23200305	23201074	+	1.82209	NA	intron (ENSMUST00000191045.1, intron 2 of 3)	lncRNA-intron (ENSMUST00000191045.1, intron 2 of 3)	34984	ENSMUST00000191045.1	ENSMUSG00000101227	ENSMUST00000191045			Gm29506			lncRNA
e11ve16_common_385	chr1	23256611	23257298	+	0.68545	NA	promoter-TSS (ENSMUST00000193885.1)	TEC-promoter-TSS (ENSMUST00000193885.1)	-547	ENSMUST00000193885.1	ENSMUSG00000102766	ENSMUST00000195365			Gm6420			TEC
e11ve16_common_386	chr1	23264214	23264483	+	0.02781	NA	Intergenic	Intergenic	-7921	ENSMUST00000083471.3	ENSMUSG00000065405	ENSMUST00000083471			Mir30a			miRNA
e11ve16_common_387	chr1	23270641	23271066	+	0.21093	NA	Intergenic	Intergenic	-1416	ENSMUST00000083471.3	ENSMUSG00000065405	ENSMUST00000083471			Mir30a			miRNA
e11ve16_common_388	chr1	23271655	23272000	+	0.57413	NA	promoter-TSS (ENSMUST00000083471.3)	miRNA-promoter-TSS (ENSMUST00000083471.3)	-442	ENSMUST00000083471.3	ENSMUSG00000065405	ENSMUST00000083471			Mir30a			miRNA
e11ve16_common_389	chr1	23286702	23287175	+	0.04692	NA	Intergenic	Intergenic	-4599	ENSMUST00000182303.1	ENSMUSG00000097970	ENSMUST00000182303			Gm27028			lncRNA
e11ve16_common_390	chr1	23321346	23321809	+	0.21678	NA	Intergenic	Intergenic	25022	ENSMUST00000189078.1	ENSMUSG00000101226	ENSMUST00000189078			Gm20954			processed_pseudogene
e11ve16_common_391	chr1	23382584	23383506	+	0.49877	NA	exon (ENSMUST00000027343.5, exon 1 of 7)	protein_coding-exon (ENSMUST00000027343.5, exon 1 of 7)	130	ENSMUST00000027343.5	ENSMUSG00000026158	ENSMUST00000186064			Ogfrl1			protein_coding
e11ve16_common_392	chr1	23747795	23748172	+	0.24058	NA	Intergenic	Intergenic	-13770	ENSMUST00000144602.1	ENSMUSG00000026156	ENSMUST00000144602			B3gat2			protein_coding
e11ve16_common_393	chr1	23761842	23764122	+	0.72655	NA	exon (ENSMUST00000063663.5, exon 1 of 4)	protein_coding-exon (ENSMUST00000063663.5, exon 1 of 4)	971	ENSMUST00000140583.1	ENSMUSG00000026156	ENSMUST00000144602			B3gat2			protein_coding
e11ve16_common_394	chr1	23792905	23793357	+	0.21806	NA	intron (ENSMUST00000063663.5, intron 1 of 3)	protein_coding-intron (ENSMUST00000063663.5, intron 1 of 3)	31120	ENSMUST00000140583.1	ENSMUSG00000026156	ENSMUST00000144602			B3gat2			protein_coding
e11ve16_common_395	chr1	23827023	23827578	+	0.12269	NA	intron (ENSMUST00000063663.5, intron 2 of 3)	protein_coding-intron (ENSMUST00000063663.5, intron 2 of 3)	20477	ENSMUST00000136506.1	ENSMUSG00000026155	ENSMUST00000129254			Smap1			protein_coding
e11ve16_common_396	chr1	23899076	23899307	+	0.02017	NA	intron (ENSMUST00000027339.13, intron 1 of 9)	protein_coding-intron (ENSMUST00000027339.13, intron 1 of 9)	-7197	ENSMUST00000133398.1	ENSMUSG00000026155	ENSMUST00000129254			Smap1			protein_coding
e11ve16_common_397	chr1	23921636	23922658	+	0.58541	NA	exon (ENSMUST00000027339.13, exon 1 of 10)	protein_coding-exon (ENSMUST00000027339.13, exon 1 of 10)	170	ENSMUST00000027339.13	ENSMUSG00000026155	ENSMUST00000129254			Smap1			protein_coding
e11ve16_common_398	chr1	23959054	23959587	+	0.32654	NA	Intergenic	Intergenic	-37003	ENSMUST00000027339.13	ENSMUSG00000026155	ENSMUST00000129254			Smap1			protein_coding
e11ve16_common_399	chr1	24004812	24005483	+	1.04953	NA	promoter-TSS (ENSMUST00000192339.1)	TEC-promoter-TSS (ENSMUST00000192339.1)	-358	ENSMUST00000192339.1	ENSMUSG00000102495	ENSMUST00000192339			Gm26524			TEC
e11ve16_common_400	chr1	24005659	24005916	+	0.49449	NA	promoter-TSS (ENSMUST00000027338.3)	protein_coding-promoter-TSS (ENSMUST00000027338.3)	-131	ENSMUST00000027338.3	ENSMUSG00000026154	ENSMUST00000155767			Sdhaf4			protein_coding
e11ve16_common_401	chr1	24033815	24034321	+	1.24559	NA	intron (ENSMUST00000187752.6, intron 11 of 20)	protein_coding-intron (ENSMUST00000027337.14, intron 11 of 20)	-4982	ENSMUST00000186331.1	ENSMUSG00000026153	ENSMUST00000027337			Fam135a			protein_coding
e11ve16_common_402	chr1	24099451	24099918	+	0.55699	NA	promoter-TSS (ENSMUST00000192408.1)	TEC-promoter-TSS (ENSMUST00000192408.1)	498	ENSMUST00000187369.6	ENSMUSG00000026153	ENSMUST00000027337			Fam135a			protein_coding
e11ve16_common_403	chr1	24100312	24100781	+	0.77379	NA	promoter-TSS (ENSMUST00000027337.14)	protein_coding-promoter-TSS (ENSMUST00000027337.14)	-79	ENSMUST00000192408.1	ENSMUSG00000102398	ENSMUST00000192408			Gm37580			TEC
e11ve16_common_404	chr1	24107478	24108472	+	0.56857	NA	Intergenic	Intergenic	7350	ENSMUST00000192408.1	ENSMUSG00000102398	ENSMUST00000192408			Gm37580			TEC
e11ve16_common_405	chr1	24171403	24171868	+	0.07655	NA	Intergenic	Intergenic	-5975	ENSMUST00000054588.14	ENSMUSG00000026147	ENSMUST00000124600			Col9a1			protein_coding
e11ve16_common_406	chr1	24195158	24196515	+	0.83621	NA	intron (ENSMUST00000054588.14, intron 7 of 37)	protein_coding-intron (ENSMUST00000054588.14, intron 7 of 37)	649	ENSMUST00000088349.2	ENSMUSG00000026147	ENSMUST00000124600			Col9a1			protein_coding
e11ve16_common_407	chr1	24219026	24219458	+	0.04164	NA	intron (ENSMUST00000054588.14, intron 20 of 37)	protein_coding-intron (ENSMUST00000054588.14, intron 20 of 37)	-10275	ENSMUST00000147902.1	ENSMUSG00000026147	ENSMUST00000124600			Col9a1			protein_coding
e11ve16_common_408	chr1	24230161	24231048	+	0.34492	NA	intron (ENSMUST00000088349.2, intron 23 of 31)	protein_coding-intron (ENSMUST00000054588.14, intron 29 of 37)	1087	ENSMUST00000147902.1	ENSMUSG00000026147	ENSMUST00000124600			Col9a1			protein_coding
e11ve16_common_409	chr1	24248942	24249293	+	0.08132	NA	intron (ENSMUST00000088349.2, intron 31 of 31)	protein_coding-intron (ENSMUST00000054588.14, intron 37 of 37)	19600	ENSMUST00000147902.1	ENSMUSG00000026147	ENSMUST00000124600			Col9a1			protein_coding
e11ve16_common_410	chr1	24302583	24303301	+	0.13765	NA	intron (ENSMUST00000115244.8, intron 37 of 50)	protein_coding-intron (ENSMUST00000051344.5, intron 37 of 47)	73425	ENSMUST00000147902.1	ENSMUSG00000026147	ENSMUST00000124600			Col9a1			protein_coding
e11ve16_common_411	chr1	24378138	24378370	+	0.81431	NA	intron (ENSMUST00000051344.5, intron 15 of 47)	protein_coding-intron (ENSMUST00000051344.5, intron 15 of 47)	74491	ENSMUST00000144297.1	ENSMUSG00000026141	ENSMUST00000115244			Col19a1			protein_coding
e11ve16_common_412	chr1	24378614	24378858	+	1.80942	NA	intron (ENSMUST00000051344.5, intron 15 of 47)	protein_coding-intron (ENSMUST00000051344.5, intron 15 of 47)	74009	ENSMUST00000144297.1	ENSMUSG00000026141	ENSMUST00000115244			Col19a1			protein_coding
e11ve16_common_413	chr1	24586304	24587543	+	0.30578	NA	intron (ENSMUST00000115244.8, intron 1 of 50)	protein_coding-intron (ENSMUST00000051344.5, intron 1 of 47)	488	ENSMUST00000051344.5	ENSMUSG00000026141	ENSMUST00000115244			Col19a1			protein_coding
e11ve16_common_414	chr1	24633452	24634075	+	0.15013	NA	Intergenic	Intergenic	-17566	ENSMUST00000187117.1	ENSMUSG00000101249	ENSMUST00000187117			Gm29216			unprocessed_pseudogene
e11ve16_common_415	chr1	24679046	24679467	+	0.66221	NA	intron (ENSMUST00000095062.9, intron 1 of 15)	protein_coding-intron (ENSMUST00000095062.9, intron 1 of 15)	330	ENSMUST00000095062.9	ENSMUSG00000073725	ENSMUST00000191471			Lmbrd1			protein_coding
e11ve16_common_416	chr1	24699284	24699901	+	0.60216	NA	intron (ENSMUST00000186096.6, intron 3 of 5)	protein_coding-intron (ENSMUST00000095062.9, intron 3 of 15)	20666	ENSMUST00000095062.9	ENSMUSG00000073725	ENSMUST00000191471			Lmbrd1			protein_coding
e11ve16_common_417	chr1	24743001	24743399	+	0.03146	NA	intron (ENSMUST00000095062.9, intron 9 of 15)	protein_coding-intron (ENSMUST00000095062.9, intron 9 of 15)	-1673	ENSMUST00000190195.1	ENSMUSG00000073725	ENSMUST00000191471			Lmbrd1			protein_coding
e11ve16_common_418	chr1	24991523	24992626	+	0.36688	NA	Intergenic	Intergenic	-19867	ENSMUST00000188406.1	ENSMUSG00000100450	ENSMUST00000188406			Gm9443			processed_pseudogene
e11ve16_common_419	chr1	25063766	25064656	+	0.53369	NA	Intergenic	Intergenic	-36979	ENSMUST00000185379.1	ENSMUSG00000099392	ENSMUST00000185379			Gm29414			lncRNA
e11ve16_common_420	chr1	25228356	25229051	+	0.49819	NA	exon (ENSMUST00000126096.7, exon 1 of 12)	protein_coding-exon (ENSMUST00000126096.7, exon 1 of 12)	123	ENSMUST00000126626.7	ENSMUSG00000033569	ENSMUST00000126096			Adgrb3			protein_coding
e11ve16_common_421	chr1	25510266	25510909	+	0.48494	NA	intron (ENSMUST00000041838.6, intron 6 of 29)	protein_coding-intron (ENSMUST00000041838.6, intron 6 of 29)	59516	ENSMUST00000122791.1	ENSMUSG00000084740	ENSMUST00000122791			Gm25294			snRNA
e11ve16_common_422	chr1	26759835	26760606	+	0.2462	NA	Intergenic	Intergenic	-72760	ENSMUST00000097801.3	ENSMUSG00000073722	ENSMUST00000097801			4931408C20Rik			protein_coding
e11ve16_common_423	chr1	30584669	30584966	+	0.17177	NA	Intergenic	Intergenic	135145	ENSMUST00000065469.2	ENSMUSG00000053185	ENSMUST00000065469			Gm9898			lncRNA
e11ve16_common_424	chr1	30700622	30700871	+	0.0673	NA	Intergenic	Intergenic	19216	ENSMUST00000065469.2	ENSMUSG00000053185	ENSMUST00000065469			Gm9898			lncRNA
e11ve16_common_425	chr1	30718194	30718660	+	0.32073	NA	TTS (ENSMUST00000065469.2)	lncRNA-TTS (ENSMUST00000065469.2)	1535	ENSMUST00000065469.2	ENSMUSG00000053185	ENSMUST00000065469			Gm9898			lncRNA
e11ve16_common_426	chr1	30718861	30719266	+	0.82488	NA	exon (ENSMUST00000065469.2, exon 2 of 2)	lncRNA-exon (ENSMUST00000065469.2, exon 2 of 2)	899	ENSMUST00000065469.2	ENSMUSG00000053185	ENSMUST00000065469			Gm9898			lncRNA
e11ve16_common_427	chr1	30872891	30873605	+	0.86849	NA	promoter-TSS (ENSMUST00000187968.1)	protein_coding-promoter-TSS (ENSMUST00000187968.1)	4	ENSMUST00000187968.1	ENSMUSG00000048874	ENSMUST00000191064			Phf3			protein_coding
e11ve16_common_428	chr1	30874016	30874216	+	0.31568	NA	promoter-TSS (ENSMUST00000185604.1)	protein_coding-promoter-TSS (ENSMUST00000185604.1)	-195	ENSMUST00000191245.6	ENSMUSG00000048874	ENSMUST00000191064			Phf3			protein_coding
e11ve16_common_429	chr1	30908857	30909289	+	0.31006	NA	Intergenic	Intergenic	-35152	ENSMUST00000191245.6	ENSMUSG00000048874	ENSMUST00000191064			Phf3			protein_coding
e11ve16_common_430	chr1	30948729	30949085	+	0.78756	NA	TTS (ENSMUST00000238874.1)	protein_coding-TTS (ENSMUST00000238874.1)	402	ENSMUST00000232841.1	ENSMUSG00000026064	ENSMUST00000153681			Ptp4a1			protein_coding
e11ve16_common_431	chr1	30950136	30950562	+	0.48753	NA	promoter-TSS (ENSMUST00000027232.14)	protein_coding-promoter-TSS (ENSMUST00000027232.14)	-579	ENSMUST00000233506.1	ENSMUSG00000117310	ENSMUST00000233506			Ptp4a1			protein_coding
e11ve16_common_432	chr1	31094276	31094753	+	0.72908	NA	intron (ENSMUST00000187892.7, intron 3 of 5)	protein_coding-intron (ENSMUST00000187892.7, intron 3 of 5)	1940	ENSMUST00000188605.1	ENSMUSG00000086727	ENSMUST00000152491			4931428L18Rik			protein_coding
e11ve16_common_433	chr1	31149689	31150758	+	0.42034	NA	TTS (ENSMUST00000186448.1)	lncRNA-TTS (ENSMUST00000186448.1)	14197	ENSMUST00000186448.1	ENSMUSG00000100910	ENSMUST00000186448			Gm29128			lncRNA
e11ve16_common_434	chr1	31640830	31641310	+	0.53324	NA	Intergenic	Intergenic	15668	ENSMUST00000157995.1	ENSMUSG00000088620	ENSMUST00000157995			Gm23032			snRNA
e11ve16_common_435	chr1	32172166	32172826	+	0.6081	NA	promoter-TSS (ENSMUST00000027226.11)	protein_coding-promoter-TSS (ENSMUST00000027226.11)	-218	ENSMUST00000027226.11	ENSMUSG00000026058	ENSMUST00000189878			Khdrbs2			protein_coding
e11ve16_common_436	chr1	33583696	33583946	+	0.71643	NA	intron (ENSMUST00000027312.10, intron 7 of 13)	protein_coding-intron (ENSMUST00000027312.10, intron 7 of 13)	33011	ENSMUST00000192891.1	ENSMUSG00000102714	ENSMUST00000192891			Gm37618			TEC
e11ve16_common_437	chr1	33657651	33658455	+	0.28126	NA	TTS (ENSMUST00000185377.1)	processed_pseudogene-TTS (ENSMUST00000185377.1)	272	ENSMUST00000185377.1	ENSMUSG00000102093	ENSMUST00000185377			Gm17813			processed_pseudogene
e11ve16_common_438	chr1	33669381	33670646	+	0.74509	NA	promoter-TSS (ENSMUST00000027312.10)	protein_coding-promoter-TSS (ENSMUST00000027312.10)	170	ENSMUST00000191965.1	ENSMUSG00000103746	ENSMUST00000191965			1700001G17Rik			TEC
e11ve16_common_439	chr1	33719795	33720691	+	0.89824	NA	promoter-TSS (ENSMUST00000115174.3)	protein_coding-promoter-TSS (ENSMUST00000115174.3)	105	ENSMUST00000151482.7	ENSMUSG00000004768	ENSMUST00000135330			Rab23			protein_coding
e11ve16_common_440	chr1	33739100	33739517	+	0.04976	NA	TTS (ENSMUST00000122822.1)	protein_coding-TTS (ENSMUST00000122822.1)	1171	ENSMUST00000132066.3	ENSMUSG00000004768	ENSMUST00000135330			Rab23			protein_coding
e11ve16_common_441	chr1	33756558	33758247	+	0.52687	NA	exon (ENSMUST00000189741.1, exon 1 of 1)	protein_coding-exon (ENSMUST00000189741.1, exon 1 of 1)	325	ENSMUST00000189741.1	ENSMUSG00000042215	ENSMUST00000155484			Bag2			protein_coding
e11ve16_common_442	chr1	33813683	33814854	+	1.48854	NA	promoter-TSS (ENSMUST00000130376.2)	protein_coding-promoter-TSS (ENSMUST00000130376.2)	-57	ENSMUST00000130376.2	ENSMUSG00000042197	ENSMUST00000130376			Zfp451			protein_coding
e11ve16_common_443	chr1	33944879	33945542	+	0.58086	NA	intron (ENSMUST00000183034.4, intron 2 of 102)	protein_coding-intron (ENSMUST00000183034.4, intron 2 of 102)	18475	ENSMUST00000190740.1	ENSMUSG00000099382	ENSMUST00000190740			Gm28631			processed_pseudogene
e11ve16_common_444	chr1	33966550	33966831	+	0.03756	NA	intron (ENSMUST00000183034.4, intron 2 of 102)	protein_coding-intron (ENSMUST00000183034.4, intron 2 of 102)	-3005	ENSMUST00000190740.1	ENSMUSG00000099382	ENSMUST00000190740			Gm28631			processed_pseudogene
e11ve16_common_445	chr1	34005386	34005917	+	1.74227	NA	promoter-TSS (ENSMUST00000182314.7)	protein_coding-promoter-TSS (ENSMUST00000182314.7)	-229	ENSMUST00000187486.6	ENSMUSG00000026131	ENSMUST00000182507			Dst			protein_coding
e11ve16_common_446	chr1	34011099	34012141	+	0.20672	NA	promoter-TSS (ENSMUST00000097785.9)	protein_coding-promoter-TSS (ENSMUST00000097785.9)	-193	ENSMUST00000097786.9	ENSMUSG00000026131	ENSMUST00000182507			Dst			protein_coding
e11ve16_common_447	chr1	34061006	34061495	+	2.31832	NA	intron (ENSMUST00000097785.9, intron 1 of 97)	protein_coding-intron (ENSMUST00000097785.9, intron 1 of 97)	-15977	ENSMUST00000239001.1	ENSMUSG00000026131	ENSMUST00000182507			Dst			protein_coding
e11ve16_common_448	chr1	34076885	34077804	+	0.33892	NA	exon (ENSMUST00000239001.1, exon 1 of 6)	protein_coding-exon (ENSMUST00000239001.1, exon 1 of 6)	117	ENSMUST00000239001.1	ENSMUSG00000026131	ENSMUST00000182507			Dst			protein_coding
e11ve16_common_449	chr1	34104677	34105299	+	1.3548	NA	intron (ENSMUST00000182410.2, intron 1 of 3)	protein_coding-intron (ENSMUST00000182410.2, intron 1 of 3)	-12371	ENSMUST00000198033.1	ENSMUSG00000105982	ENSMUST00000198033			Mir6896			miRNA
e11ve16_common_450	chr1	34120706	34121768	+	0.28607	NA	promoter-TSS (ENSMUST00000183006.4)	protein_coding-promoter-TSS (ENSMUST00000183006.4)	-13	ENSMUST00000183006.4	ENSMUSG00000026131	ENSMUST00000182507			Dst			protein_coding
e11ve16_common_451	chr1	34139776	34140617	+	0.99643	NA	intron (ENSMUST00000115104.9, intron 6 of 97)	protein_coding-intron (ENSMUST00000097785.9, intron 6 of 97)	18946	ENSMUST00000183006.4	ENSMUSG00000026131	ENSMUST00000182507			Dst			protein_coding
e11ve16_common_452	chr1	34236297	34237767	+	1.38159	NA	exon (ENSMUST00000194192.2, exon 1 of 23)	protein_coding-exon (ENSMUST00000194192.2, exon 1 of 23)	436	ENSMUST00000194192.2	ENSMUSG00000026131	ENSMUST00000182507			Dst			protein_coding
e11ve16_common_453	chr1	34432961	34433448	+	0.27723	NA	promoter-TSS (ENSMUST00000175111.1)	miRNA-promoter-TSS (ENSMUST00000175111.1)	-5	ENSMUST00000175111.1	ENSMUSG00000092852	ENSMUST00000175111			Mir5103			miRNA
e11ve16_common_454	chr1	34433923	34434197	+	1.3549	NA	promoter-TSS (ENSMUST00000175111.1)	miRNA-promoter-TSS (ENSMUST00000175111.1)	-796	ENSMUST00000192173.1	ENSMUSG00000102336	ENSMUST00000192173			Gm37233			lncRNA
e11ve16_common_455	chr1	34434330	34435143	+	2.25348	NA	Intergenic	Intergenic	-1472	ENSMUST00000192173.1	ENSMUSG00000102336	ENSMUST00000192173			Gm37233			lncRNA
e11ve16_common_456	chr1	34439138	34440256	+	0.72154	NA	promoter-TSS (ENSMUST00000027303.13)	protein_coding-promoter-TSS (ENSMUST00000027303.13)	-25	ENSMUST00000042493.9	ENSMUSG00000042111	ENSMUST00000188583			Ccdc115			protein_coding
e11ve16_common_457	chr1	34459243	34459646	+	0.54176	NA	promoter-TSS (ENSMUST00000027302.13)	protein_coding-promoter-TSS (ENSMUST00000027302.13)	-318	ENSMUST00000185610.1	ENSMUSG00000026126	ENSMUST00000188884			Ptpn18			protein_coding
e11ve16_common_458	chr1	34460010	34460371	+	1.4124	NA	exon (ENSMUST00000185610.1, exon 1 of 1)	protein_coding-exon (ENSMUST00000185610.1, exon 1 of 1)	398	ENSMUST00000188884.2	ENSMUSG00000026126	ENSMUST00000188884			Ptpn18			protein_coding
e11ve16_common_459	chr1	34472634	34473469	+	1.06988	NA	promoter-TSS (ENSMUST00000185218.1)	lncRNA-promoter-TSS (ENSMUST00000185218.1)	61	ENSMUST00000185881.1	ENSMUSG00000100280	ENSMUST00000185218			Gm28417			lncRNA
e11ve16_common_460	chr1	34536754	34537602	+	1.63681	NA	TTS (ENSMUST00000189108.1)	processed_pseudogene-TTS (ENSMUST00000189108.1)	1382	ENSMUST00000189108.1	ENSMUSG00000101803	ENSMUST00000189108			Gm28419			processed_pseudogene
e11ve16_common_461	chr1	34579258	34579971	+	1.76546	NA	promoter-TSS (ENSMUST00000052670.10)	protein_coding-promoter-TSS (ENSMUST00000052670.10)	-1	ENSMUST00000062557.3	ENSMUSG00000045815	ENSMUST00000062557			1700101I19Rik			lncRNA
e11ve16_common_462	chr1	34601932	34602522	+	0.38753	NA	Intergenic	Intergenic	5492	ENSMUST00000186179.1	ENSMUSG00000100524	ENSMUST00000186179			Gm28418			processed_pseudogene
e11ve16_common_463	chr1	34677656	34678909	+	0.56925	NA	promoter-TSS (ENSMUST00000159747.8)	protein_coding-promoter-TSS (ENSMUST00000159747.8)	94	ENSMUST00000159747.8	ENSMUSG00000037509	ENSMUST00000159747			Arhgef4			protein_coding
e11ve16_common_464	chr1	34750306	34751206	+	1.11852	NA	exon (ENSMUST00000159021.8, exon 1 of 6)	protein_coding-exon (ENSMUST00000159021.8, exon 1 of 6)	175	ENSMUST00000159021.8	ENSMUSG00000037509	ENSMUST00000159747			Arhgef4			protein_coding
e11ve16_common_465	chr1	34793330	34794136	+	0.10057	NA	intron (ENSMUST00000159021.8, intron 2 of 5)	protein_coding-intron (ENSMUST00000159021.8, intron 2 of 5)	-7971	ENSMUST00000047664.15	ENSMUSG00000037509	ENSMUST00000159747			Arhgef4			protein_coding
e11ve16_common_466	chr1	34801475	34802533	+	0.2135	NA	TTS (ENSMUST00000211073.1)	protein_coding-TTS (ENSMUST00000211073.1)	210	ENSMUST00000211073.1	ENSMUSG00000118272	ENSMUST00000211073			Arhgef4			protein_coding
e11ve16_common_467	chr1	34819478	34819695	+	0.73623	NA	TTS (ENSMUST00000185231.1)	protein_coding-TTS (ENSMUST00000185231.1)	-3939	ENSMUST00000192924.1	ENSMUSG00000104358	ENSMUST00000192924			Gm37127			TEC
e11ve16_common_468	chr1	34842347	34843522	+	0.23296	NA	promoter-TSS (ENSMUST00000170092.7)	protein_coding-promoter-TSS (ENSMUST00000170092.7)	30	ENSMUST00000170092.7	ENSMUSG00000037503	ENSMUST00000185469			Fam168b			protein_coding
e11ve16_common_469	chr1	34849697	34850451	+	0.38865	NA	promoter-TSS (ENSMUST00000027297.10)	protein_coding-promoter-TSS (ENSMUST00000027297.10)	82	ENSMUST00000027297.10	ENSMUSG00000026123	ENSMUST00000191722			Plekhb2			protein_coding
e11ve16_common_470	chr1	34891795	34892033	+	0.16571	NA	Intergenic	Intergenic	14258	ENSMUST00000191722.1	ENSMUSG00000026123	ENSMUST00000191722			Plekhb2			protein_coding
e11ve16_common_471	chr1	35344644	35344956	+	0.46886	NA	Intergenic	Intergenic	-165716	ENSMUST00000104043.1	ENSMUSG00000077231	ENSMUST00000104043			Gm25096			snoRNA
e11ve16_common_472	chr1	35368575	35368896	+	0.42381	NA	Intergenic	Intergenic	-189651	ENSMUST00000104043.1	ENSMUSG00000077231	ENSMUST00000104043			Gm25096			snoRNA
e11ve16_common_473	chr1	35770474	35770766	+	0.24966	NA	Intergenic	Intergenic	9018	ENSMUST00000082667.1	ENSMUSG00000064601	ENSMUST00000082667			Gm25634			snRNA
e11ve16_common_474	chr1	35813913	35814948	+	0.47018	NA	Intergenic	Intergenic	7456	ENSMUST00000187528.1	ENSMUSG00000101714	ENSMUST00000187528			Gm28415			lncRNA
e11ve16_common_475	chr1	35825326	35825791	+	0.84618	NA	Intergenic	Intergenic	18584	ENSMUST00000187528.1	ENSMUSG00000101714	ENSMUST00000187528			Gm28415			lncRNA
e11ve16_common_476	chr1	35869675	35870034	+	0.25678	NA	Intergenic	Intergenic	-9991	ENSMUST00000194261.1	ENSMUSG00000102531	ENSMUST00000194261			1110002O04Rik			lncRNA
e11ve16_common_477	chr1	36016941	36017743	+	0.76103	NA	Intergenic	Intergenic	6270	ENSMUST00000192017.1	ENSMUSG00000104201	ENSMUST00000192017			4930535G08Rik			lncRNA
e11ve16_common_478	chr1	36059821	36060825	+	0.67891	NA	Intergenic	Intergenic	-8077	ENSMUST00000088174.3	ENSMUSG00000045216	ENSMUST00000194670			Hs6st1			protein_coding
e11ve16_common_479	chr1	36068027	36070248	+	0.74763	NA	exon (ENSMUST00000088174.3, exon 1 of 2)	protein_coding-exon (ENSMUST00000088174.3, exon 1 of 2)	737	ENSMUST00000088174.3	ENSMUSG00000045216	ENSMUST00000194670			Hs6st1			protein_coding
e11ve16_common_480	chr1	36243751	36244645	+	0.79048	NA	promoter-TSS (ENSMUST00000174266.7)	protein_coding-promoter-TSS (ENSMUST00000174266.7)	-37	ENSMUST00000174266.7	ENSMUSG00000037470	ENSMUST00000192159			Uggt1			protein_coding
e11ve16_common_481	chr1	36307537	36308447	+	0.71041	NA	exon (ENSMUST00000192874.1, exon 1 of 1)	protein_coding-exon (ENSMUST00000192874.1, exon 1 of 1)	213	ENSMUST00000140218.1	ENSMUSG00000037447	ENSMUST00000150747			Arid5a			protein_coding
e11ve16_common_482	chr1	36324278	36324503	+	1.10341	NA	TTS (ENSMUST00000137906.1)	protein_coding-TTS (ENSMUST00000137906.1)	7363	ENSMUST00000141121.1	ENSMUSG00000037447	ENSMUST00000150747			Arid5a			protein_coding
e11ve16_common_483	chr1	36368497	36369290	+	0.73363	NA	promoter-TSS (ENSMUST00000186470.1)	protein_coding-promoter-TSS (ENSMUST00000186470.1)	209	ENSMUST00000188957.1	ENSMUSG00000010453	ENSMUST00000185621			Kansl3			protein_coding
e11ve16_common_484	chr1	36444600	36445661	+	1.05461	NA	exon (ENSMUST00000001171.12, exon 1 of 7)	protein_coding-exon (ENSMUST00000001171.12, exon 1 of 7)	127	ENSMUST00000193502.1	ENSMUSG00000001143	ENSMUST00000115011			Lman2l			protein_coding
e11ve16_common_485	chr1	36471283	36472108	+	0.9143	NA	promoter-TSS (ENSMUST00000153128.1)	protein_coding-promoter-TSS (ENSMUST00000153128.1)	75	ENSMUST00000153128.1	ENSMUSG00000037408	ENSMUST00000153128			Cnnm4			protein_coding
e11ve16_common_486	chr1	36511484	36511894	+	0.35721	NA	promoter-TSS (ENSMUST00000001166.13)	protein_coding-promoter-TSS (ENSMUST00000001166.13)	-178	ENSMUST00000097776.3	ENSMUSG00000001138	ENSMUST00000097776			Cnnm3			protein_coding
e11ve16_common_487	chr1	36546670	36547764	+	0.39548	NA	promoter-TSS (ENSMUST00000194894.3)	protein_coding-promoter-TSS (ENSMUST00000194894.3)	2	ENSMUST00000208269.1	ENSMUSG00000079610	ENSMUST00000194894			Ankrd39			protein_coding
e11ve16_common_488	chr1	36556566	36557308	+	1.41713	NA	promoter-TSS (ENSMUST00000194426.1)	lncRNA-promoter-TSS (ENSMUST00000194426.1)	589	ENSMUST00000191642.5	ENSMUSG00000026121	ENSMUST00000193382			Sema4c			protein_coding
e11ve16_common_489	chr1	36558264	36558922	+	0.41952	NA	promoter-TSS (ENSMUST00000114991.7)	protein_coding-promoter-TSS (ENSMUST00000114991.7)	234	ENSMUST00000149224.2	ENSMUSG00000087589	ENSMUST00000194426			D430040D24Rik			lncRNA
e11ve16_common_490	chr1	36580046	36580309	+	2.18072	NA	intron (ENSMUST00000170295.7, intron 11 of 14)	protein_coding-intron (ENSMUST00000170295.7, intron 11 of 14)	7510	ENSMUST00000193155.5	ENSMUSG00000046337	ENSMUST00000193763			Fam178b			protein_coding
e11ve16_common_491	chr1	36580424	36581037	+	0.71883	NA	intron (ENSMUST00000170295.7, intron 11 of 14)	protein_coding-intron (ENSMUST00000170295.7, intron 11 of 14)	6957	ENSMUST00000193155.5	ENSMUSG00000046337	ENSMUST00000193763			Fam178b			protein_coding
e11ve16_common_492	chr1	36592850	36593396	+	0.09504	NA	intron (ENSMUST00000194839.5, intron 2 of 5)	protein_coding-intron (ENSMUST00000195729.1, intron 2 of 4)	209	ENSMUST00000193763.5	ENSMUSG00000046337	ENSMUST00000193763			Fam178b			protein_coding
e11ve16_common_493	chr1	36691221	36692015	+	1.92762	NA	promoter-TSS (ENSMUST00000191790.5)	protein_coding-promoter-TSS (ENSMUST00000191790.5)	8	ENSMUST00000195151.5	ENSMUSG00000061518	ENSMUST00000191790			Cox5b			protein_coding
e11ve16_common_494	chr1	36709158	36710163	+	1.12262	NA	promoter-TSS (ENSMUST00000159448.7)	protein_coding-promoter-TSS (ENSMUST00000159448.7)	18	ENSMUST00000159448.7	ENSMUSG00000037351	ENSMUST00000160043			Actr1b			protein_coding
e11ve16_common_495	chr1	36784855	36785511	+	1.51959	NA	Intergenic	Intergenic	6199	ENSMUST00000190128.1	ENSMUSG00000026117	ENSMUST00000027291			Zap70			protein_coding
e11ve16_common_496	chr1	36920176	36920788	+	0.13197	NA	intron (ENSMUST00000185964.2, intron 1 of 5)	protein_coding-intron (ENSMUST00000027290.11, intron 1 of 40)	-3943	ENSMUST00000194317.1	ENSMUSG00000102930	ENSMUST00000194317			Gm38115			lncRNA
e11ve16_common_497	chr1	36939006	36940210	+	0.18891	NA	promoter-TSS (ENSMUST00000027290.11)	protein_coding-promoter-TSS (ENSMUST00000027290.11)	-81	ENSMUST00000027290.11	ENSMUSG00000026116	ENSMUST00000027290			Tmem131			protein_coding
e11ve16_common_498	chr1	37299717	37300537	+	0.81846	NA	promoter-TSS (ENSMUST00000132401.7)	protein_coding-promoter-TSS (ENSMUST00000132401.7)	-181	ENSMUST00000132401.7	ENSMUSG00000026113	ENSMUST00000146676			Inpp4a			protein_coding
e11ve16_common_499	chr1	37317588	37318336	+	0.16596	NA	intron (ENSMUST00000136846.7, intron 1 of 25)	protein_coding-intron (ENSMUST00000027287.10, intron 1 of 25)	13542	ENSMUST00000192652.1	ENSMUSG00000102879	ENSMUST00000192652			Gm37135			TEC
e11ve16_common_500	chr1	37336512	37337436	+	0.7615	NA	intron (ENSMUST00000136846.7, intron 1 of 25)	protein_coding-intron (ENSMUST00000027287.10, intron 1 of 25)	-2802	ENSMUST00000141402.1	ENSMUSG00000086064	ENSMUST00000137241			4930439A04Rik			lncRNA
e11ve16_common_501	chr1	37350659	37351303	+	2.31929	NA	intron (ENSMUST00000136846.7, intron 1 of 25)	protein_coding-intron (ENSMUST00000027287.10, intron 1 of 25)	-6416	ENSMUST00000132615.7	ENSMUSG00000026113	ENSMUST00000146676			Inpp4a			protein_coding
e11ve16_common_502	chr1	37429482	37430653	+	0.22403	NA	promoter-TSS (ENSMUST00000027285.12)	protein_coding-promoter-TSS (ENSMUST00000027285.12)	36	ENSMUST00000027286.6	ENSMUSG00000026112	ENSMUST00000027286			Coa5			protein_coding
e11ve16_common_503	chr1	37540574	37541416	+	0.73252	NA	promoter-TSS (ENSMUST00000151952.7)	protein_coding-promoter-TSS (ENSMUST00000151952.7)	21	ENSMUST00000151952.7	ENSMUSG00000026110	ENSMUST00000154819			Mgat4a			protein_coding
e11ve16_common_504	chr1	37614783	37616260	+	0.16684	NA	TTS (ENSMUST00000160659.1)	lncRNA-TTS (ENSMUST00000160659.1)	1262	ENSMUST00000160659.1	ENSMUSG00000089767	ENSMUST00000160659			4930556I23Rik			lncRNA
e11ve16_common_505	chr1	37616377	37616980	+	0.09499	NA	intron (ENSMUST00000160023.5, intron 1 of 3)	protein_coding-intron (ENSMUST00000160023.5, intron 1 of 3)	2419	ENSMUST00000160659.1	ENSMUSG00000089767	ENSMUST00000160659			4930556I23Rik			lncRNA
e11ve16_common_506	chr1	37665669	37667250	+	0.65284	NA	intron (ENSMUST00000162875.7, intron 1 of 9)	protein_coding-intron (ENSMUST00000160589.1, intron 2 of 3)	5737	ENSMUST00000192005.1	ENSMUSG00000104365	ENSMUST00000192005			4930470B04Rik			TEC
e11ve16_common_507	chr1	37718633	37720429	+	0.40666	NA	intron (ENSMUST00000160589.1, intron 1 of 3)	protein_coding-intron (ENSMUST00000160589.1, intron 1 of 3)	264	ENSMUST00000160589.1	ENSMUSG00000026090	ENSMUST00000160023			2010300C02Rik			protein_coding
e11ve16_common_508	chr1	37864539	37864873	+	1.08483	NA	promoter-TSS (ENSMUST00000181885.1)	lncRNA-promoter-TSS (ENSMUST00000181885.1)	130	ENSMUST00000239367.1	ENSMUSG00000060771	ENSMUST00000088072			Tsga10			protein_coding
e11ve16_common_509	chr1	37865368	37865622	+	0.6106	NA	promoter-TSS (ENSMUST00000041815.14)	protein_coding-promoter-TSS (ENSMUST00000041815.14)	196	ENSMUST00000181885.1	ENSMUSG00000097268	ENSMUST00000181885			Gm26805			lncRNA
e11ve16_common_510	chr1	37871713	37872859	+	0.35727	NA	promoter-TSS (ENSMUST00000041621.4)	protein_coding-promoter-TSS (ENSMUST00000041621.4)	80	ENSMUST00000041621.4	ENSMUSG00000037216	ENSMUST00000128085			Lipt1			protein_coding
e11ve16_common_511	chr1	37889804	37891282	+	0.76136	NA	promoter-TSS (ENSMUST00000027256.11)	protein_coding-promoter-TSS (ENSMUST00000027256.11)	0	ENSMUST00000160082.2	ENSMUSG00000026087	ENSMUST00000161694			Mrpl30			protein_coding
e11ve16_common_512	chr1	37996926	37998609	+	0.21032	NA	promoter-TSS (ENSMUST00000027252.7)	protein_coding-promoter-TSS (ENSMUST00000027252.7)	126	ENSMUST00000195247.5	ENSMUSG00000058407	ENSMUST00000194692			Txndc9			protein_coding
e11ve16_common_513	chr1	38129021	38129769	+	0.29108	NA	intron (ENSMUST00000195383.1, intron 1 of 3)	protein_coding-intron (ENSMUST00000027251.11, intron 1 of 22)	267	ENSMUST00000027251.11	ENSMUSG00000026082	ENSMUST00000193008			Rev1			protein_coding
e11ve16_common_514	chr1	38129961	38130282	+	1.49327	NA	promoter-TSS (ENSMUST00000027251.11)	protein_coding-promoter-TSS (ENSMUST00000027251.11)	-320	ENSMUST00000195383.1	ENSMUSG00000026082	ENSMUST00000193008			Rev1			protein_coding
e11ve16_common_515	chr1	38358078	38358833	+	0.23186	NA	intron (ENSMUST00000095027.8, intron 5 of 21)	protein_coding-intron (ENSMUST00000027250.13, intron 6 of 7)	-26494	ENSMUST00000143261.7	ENSMUSG00000087131	ENSMUST00000143261			Gm16152			lncRNA
e11ve16_common_516	chr1	38393157	38393730	+	0.4835	NA	intron (ENSMUST00000143261.7, intron 4 of 4)	protein_coding-intron (ENSMUST00000027250.13, intron 6 of 7)	4614	ENSMUST00000131663.1	ENSMUSG00000087131	ENSMUST00000143261			Gm16152			lncRNA
e11ve16_common_517	chr1	38627032	38627348	+	2.13202	NA	promoter-TSS (ENSMUST00000095027.8)	protein_coding-promoter-TSS (ENSMUST00000095027.8)	-5	ENSMUST00000095027.8	ENSMUSG00000037138	ENSMUST00000039827			Aff3			protein_coding
e11ve16_common_518	chr1	38897891	38898237	+	1.82808	NA	promoter-TSS (ENSMUST00000027249.11)	protein_coding-promoter-TSS (ENSMUST00000027249.11)	25	ENSMUST00000193441.5	ENSMUSG00000026080	ENSMUST00000192948			Chst10			protein_coding
e11ve16_common_519	chr1	38987185	38988412	+	0.66378	NA	promoter-TSS (ENSMUST00000193489.1)	protein_coding-promoter-TSS (ENSMUST00000193489.1)	-43	ENSMUST00000193489.1	ENSMUSG00000026078	ENSMUST00000193073			Pdcl3			protein_coding
e11ve16_common_520	chr1	39029410	39030107	+	0.05387	NA	Intergenic	Intergenic	27879	ENSMUST00000195476.1	ENSMUSG00000104188	ENSMUST00000195476			Gm37821			lncRNA
e11ve16_common_521	chr1	39192510	39194503	+	0.47883	NA	promoter-TSS (ENSMUST00000056815.8)	protein_coding-promoter-TSS (ENSMUST00000056815.8)	-225	ENSMUST00000173050.7	ENSMUSG00000026077	ENSMUST00000172825			Npas2			protein_coding
e11ve16_common_522	chr1	39281194	39281891	+	0.64571	NA	intron (ENSMUST00000056815.8, intron 2 of 20)	protein_coding-intron (ENSMUST00000056815.8, intron 2 of 20)	-4977	ENSMUST00000174365.1	ENSMUSG00000092553	ENSMUST00000174365			Gm20428			processed_pseudogene
e11ve16_common_523	chr1	39292298	39292520	+	2.11537	NA	intron (ENSMUST00000056815.8, intron 3 of 20)	protein_coding-intron (ENSMUST00000056815.8, intron 3 of 20)	-15844	ENSMUST00000174365.1	ENSMUSG00000092553	ENSMUST00000174365			Gm20428			processed_pseudogene
e11ve16_common_524	chr1	39313711	39314000	+	1.21788	NA	intron (ENSMUST00000056815.8, intron 7 of 20)	protein_coding-intron (ENSMUST00000056815.8, intron 7 of 20)	-1044	ENSMUST00000173076.1	ENSMUSG00000092563	ENSMUST00000173076			Gm3617			processed_pseudogene
e11ve16_common_525	chr1	39335952	39336482	+	1.35716	NA	intron (ENSMUST00000056815.8, intron 15 of 20)	protein_coding-intron (ENSMUST00000056815.8, intron 15 of 20)	-5338	ENSMUST00000172825.1	ENSMUSG00000026077	ENSMUST00000172825			Npas2			protein_coding
e11ve16_common_526	chr1	39367315	39368722	+	0.99861	NA	promoter-TSS (ENSMUST00000178079.7)	protein_coding-promoter-TSS (ENSMUST00000178079.7)	89	ENSMUST00000179954.7	ENSMUSG00000073702	ENSMUST00000179954			Rpl31			protein_coding
e11ve16_common_527	chr1	39392429	39394259	+	0.24753	NA	promoter-TSS (ENSMUST00000195854.1)	protein_coding-promoter-TSS (ENSMUST00000195854.1)	-713	ENSMUST00000195854.1	ENSMUSG00000003134	ENSMUST00000054462			Tbc1d8			protein_coding
e11ve16_common_528	chr1	39408848	39409257	+	0.59218	NA	intron (ENSMUST00000054462.10, intron 2 of 19)	protein_coding-intron (ENSMUST00000054462.10, intron 2 of 19)	10880	ENSMUST00000191698.1	ENSMUSG00000102607	ENSMUST00000191698			Gm37265			TEC
e11ve16_common_529	chr1	39410221	39410593	+	0.39457	NA	intron (ENSMUST00000054462.10, intron 2 of 19)	protein_coding-intron (ENSMUST00000054462.10, intron 2 of 19)	9525	ENSMUST00000191698.1	ENSMUSG00000102607	ENSMUST00000191698			Gm37265			TEC
e11ve16_common_530	chr1	39445605	39446033	+	0.2733	NA	intron (ENSMUST00000193823.1, intron 1 of 18)	protein_coding-intron (ENSMUST00000054462.10, intron 1 of 19)	-25887	ENSMUST00000191698.1	ENSMUSG00000102607	ENSMUST00000191698			Gm37265			TEC
e11ve16_common_531	chr1	39478089	39479113	+	1.04971	NA	promoter-TSS (ENSMUST00000192531.5)	protein_coding-promoter-TSS (ENSMUST00000192531.5)	60	ENSMUST00000192531.5	ENSMUSG00000003134	ENSMUST00000054462			Tbc1d8			protein_coding
e11ve16_common_532	chr1	39535429	39536291	+	0.60351	NA	promoter-TSS (ENSMUST00000003219.13)	protein_coding-promoter-TSS (ENSMUST00000003219.13)	58	ENSMUST00000003219.13	ENSMUSG00000003135	ENSMUST00000160145			Cnot11			protein_coding
e11ve16_common_533	chr1	39576481	39577568	+	0.39184	NA	exon (ENSMUST00000062525.10, exon 1 of 7)	protein_coding-exon (ENSMUST00000062525.10, exon 1 of 7)	279	ENSMUST00000195705.1	ENSMUSG00000048234	ENSMUST00000195136			Rnf149			protein_coding
e11ve16_common_534	chr1	39650423	39650665	+	1.64967	NA	exon (ENSMUST00000053355.5, exon 1 of 4)	protein_coding-exon (ENSMUST00000053355.5, exon 1 of 4)	368	ENSMUST00000181841.1	ENSMUSG00000097083	ENSMUST00000181841			D930019O06Rik			lncRNA
e11ve16_common_535	chr1	39670340	39670908	+	1.21659	NA	intron (ENSMUST00000151913.2, intron 13 of 14)	protein_coding-intron (ENSMUST00000151913.2, intron 13 of 14)	-19150	ENSMUST00000053355.5	ENSMUSG00000050967	ENSMUST00000053355			Creg2			protein_coding
e11ve16_common_536	chr1	39720926	39721141	+	2.37314	NA	promoter-TSS (ENSMUST00000151913.2)	protein_coding-promoter-TSS (ENSMUST00000151913.2)	-36	ENSMUST00000151913.2	ENSMUSG00000057173	ENSMUST00000151913			Rfx8			protein_coding
e11ve16_common_537	chr1	39761596	39762208	+	1.91749	NA	Intergenic	Intergenic	-40905	ENSMUST00000151913.2	ENSMUSG00000057173	ENSMUST00000151913			Rfx8			protein_coding
e11ve16_common_538	chr1	39779362	39779865	+	0.45173	NA	Intergenic	Intergenic	25719	ENSMUST00000171319.3	ENSMUSG00000091937	ENSMUST00000171319			Gm3646			protein_coding
e11ve16_common_539	chr1	39884974	39885283	+	1.01133	NA	Intergenic	Intergenic	-15785	ENSMUST00000163854.8	ENSMUSG00000026074	ENSMUST00000195259			Map4k4			protein_coding
e11ve16_common_540	chr1	39900294	39901990	+	1.06596	NA	promoter-TSS (ENSMUST00000191761.5)	protein_coding-promoter-TSS (ENSMUST00000191761.5)	-28	ENSMUST00000191761.5	ENSMUSG00000026074	ENSMUST00000195259			Map4k4			protein_coding
e11ve16_common_541	chr1	39947876	39948125	+	0.21485	NA	intron (ENSMUST00000168431.6, intron 2 of 29)	protein_coding-intron (ENSMUST00000163854.8, intron 2 of 30)	-16155	ENSMUST00000193514.6	ENSMUSG00000026074	ENSMUST00000195259			Map4k4			protein_coding
e11ve16_common_542	chr1	40085480	40086130	+	0.14832	NA	promoter-TSS (ENSMUST00000181756.2)	lncRNA-promoter-TSS (ENSMUST00000181756.2)	46	ENSMUST00000181756.2	ENSMUSG00000097899	ENSMUST00000181756			Gm16894			lncRNA
e11ve16_common_543	chr1	40116329	40116551	+	0.21907	NA	intron (ENSMUST00000027243.12, intron 5 of 8)	protein_coding-intron (ENSMUST00000027243.12, intron 5 of 8)	27929	ENSMUST00000193969.1	ENSMUSG00000102975	ENSMUST00000193969			Gm37347			TEC
e11ve16_common_544	chr1	40225093	40225650	+	0.30918	NA	intron (ENSMUST00000027241.10, intron 1 of 10)	protein_coding-intron (ENSMUST00000027241.10, intron 1 of 10)	291	ENSMUST00000027241.10	ENSMUSG00000026072	ENSMUST00000027241			Il1r1			protein_coding
e11ve16_common_545	chr1	40255260	40255644	+	0.04725	NA	intron (ENSMUST00000027241.10, intron 1 of 10)	protein_coding-intron (ENSMUST00000027241.10, intron 1 of 10)	-11134	ENSMUST00000114795.2	ENSMUSG00000026072	ENSMUST00000027241			Il1r1			protein_coding
e11ve16_common_546	chr1	40266274	40266782	+	0.9885	NA	promoter-TSS (ENSMUST00000114795.2)	protein_coding-promoter-TSS (ENSMUST00000114795.2)	-58	ENSMUST00000114795.2	ENSMUSG00000026072	ENSMUST00000027241			Il1r1			protein_coding
e11ve16_common_547	chr1	40267013	40267343	+	2.31419	NA	intron (ENSMUST00000114795.2, intron 1 of 10)	protein_coding-intron (ENSMUST00000027241.10, intron 1 of 10)	521	ENSMUST00000195402.1	ENSMUSG00000026072	ENSMUST00000027241			Il1r1			protein_coding
e11ve16_common_548	chr1	40324774	40325830	+	0.5546	NA	promoter-TSS (ENSMUST00000193388.1)	protein_coding-promoter-TSS (ENSMUST00000193388.1)	-309	ENSMUST00000193388.1	ENSMUSG00000070942	ENSMUST00000095020			Il1rl2			protein_coding
e11ve16_common_549	chr1	40665649	40666393	+	0.20682	NA	Intergenic	Intergenic	-14553	ENSMUST00000027231.12	ENSMUSG00000026062	ENSMUST00000192294			Slc9a2			protein_coding
e11ve16_common_550	chr1	40680745	40682035	+	0.72671	NA	promoter-TSS (ENSMUST00000192345.1)	protein_coding-promoter-TSS (ENSMUST00000192345.1)	-207	ENSMUST00000192345.1	ENSMUSG00000026062	ENSMUST00000192294			Slc9a2			protein_coding
e11ve16_common_551	chr1	40790238	40790464	+	2.06905	NA	exon (ENSMUST00000131390.7, exon 2 of 7)	protein_coding-exon (ENSMUST00000131390.7, exon 2 of 7)	306	ENSMUST00000144385.1	ENSMUSG00000041945	ENSMUST00000039672			Mfsd9			protein_coding
e11ve16_common_552	chr1	40790667	40790974	+	0.55842	NA	promoter-TSS (ENSMUST00000039672.5)	protein_coding-promoter-TSS (ENSMUST00000039672.5)	-133	ENSMUST00000131390.7	ENSMUSG00000041945	ENSMUST00000039672			Mfsd9			protein_coding
e11ve16_common_553	chr1	41157690	41158076	+	2.08748	NA	Intergenic	Intergenic	23369	ENSMUST00000194002.1	ENSMUSG00000104072	ENSMUST00000194002			4930448I06Rik			lncRNA
e11ve16_common_554	chr1	41274736	41275644	+	0.36948	NA	Intergenic	Intergenic	-93938	ENSMUST00000194002.1	ENSMUSG00000104072	ENSMUST00000194002			4930448I06Rik			lncRNA
e11ve16_common_555	chr1	41389975	41390856	+	0.39087	NA	Intergenic	Intergenic	139128	ENSMUST00000191087.1	ENSMUSG00000100185	ENSMUST00000191087			Gm28634			lncRNA
e11ve16_common_556	chr1	41810502	41810916	+	0.88397	NA	intron (ENSMUST00000186391.1, intron 1 of 5)	lncRNA-intron (ENSMUST00000186391.1, intron 1 of 5)	28901	ENSMUST00000186391.1	ENSMUSG00000100832	ENSMUST00000186391			Gm29260			lncRNA
e11ve16_common_557	chr1	42491563	42492115	+	1.96534	NA	promoter-TSS (ENSMUST00000191992.1)	TEC-promoter-TSS (ENSMUST00000191992.1)	26	ENSMUST00000191992.1	ENSMUSG00000103106	ENSMUST00000191992			Gm37047			TEC
e11ve16_common_558	chr1	42539715	42540239	+	0.48317	NA	Intergenic	Intergenic	48164	ENSMUST00000191992.1	ENSMUSG00000103106	ENSMUST00000191992			Gm37047			TEC
e11ve16_common_559	chr1	42633813	42634088	+	0.31202	NA	intron (ENSMUST00000181660.7, intron 2 of 3)	lncRNA-intron (ENSMUST00000181660.7, intron 2 of 3)	17729	ENSMUST00000176977.7	ENSMUSG00000060424	ENSMUST00000176052			Pantr1			lncRNA
e11ve16_common_560	chr1	42713393	42713619	+	1.82153	NA	promoter-TSS (ENSMUST00000180589.1)	lncRNA-promoter-TSS (ENSMUST00000180589.1)	-52	ENSMUST00000180589.1	ENSMUSG00000097063	ENSMUST00000180589			Pantr2			lncRNA
e11ve16_common_561	chr1	42713859	42714148	+	1.64372	NA	promoter-TSS (ENSMUST00000180589.1)	lncRNA-promoter-TSS (ENSMUST00000180589.1)	-549	ENSMUST00000180589.1	ENSMUSG00000097063	ENSMUST00000180589			Pantr2			lncRNA
e11ve16_common_562	chr1	42850860	42851915	+	1.23731	NA	exon (ENSMUST00000057208.12, exon 1 of 11)	protein_coding-exon (ENSMUST00000057208.12, exon 1 of 11)	102	ENSMUST00000188174.6	ENSMUSG00000060679	ENSMUST00000057208			Mrps9			protein_coding
e11ve16_common_563	chr1	42878419	42878874	+	0.44659	NA	intron (ENSMUST00000188174.6, intron 2 of 3)	protein_coding-intron (ENSMUST00000057208.12, intron 2 of 10)	-9091	ENSMUST00000201108.3	ENSMUSG00000060679	ENSMUST00000057208			Mrps9			protein_coding
e11ve16_common_564	chr1	42952566	42953167	+	1.20495	NA	promoter-TSS (ENSMUST00000179655.1)	protein_coding-promoter-TSS (ENSMUST00000179655.1)	-6	ENSMUST00000188621.1	ENSMUSG00000041907	ENSMUST00000187998			Gpr45			protein_coding
e11ve16_common_565	chr1	43046653	43047476	+	1.35729	NA	TTS (ENSMUST00000095014.7)	protein_coding-TTS (ENSMUST00000095014.7)	-9203	ENSMUST00000185980.1	ENSMUSG00000100269	ENSMUST00000185980			Gm28782			lncRNA
e11ve16_common_566	chr1	43066160	43066536	+	1.96768	NA	intron (ENSMUST00000188728.1, intron 3 of 4)	protein_coding-intron (ENSMUST00000095014.7, intron 5 of 12)	-5415	ENSMUST00000188598.1	ENSMUSG00000070939	ENSMUST00000189010			Tgfbrap1			protein_coding
e11ve16_common_567	chr1	43091867	43092392	+	0.51066	NA	promoter-TSS (ENSMUST00000039080.3)	lncRNA-promoter-TSS (ENSMUST00000039080.3)	318	ENSMUST00000188728.1	ENSMUSG00000070939	ENSMUST00000189010			Tgfbrap1			protein_coding
e11ve16_common_568	chr1	43092556	43093003	+	0.46368	NA	promoter-TSS (ENSMUST00000186694.6)	protein_coding-promoter-TSS (ENSMUST00000186694.6)	-50	ENSMUST00000186694.6	ENSMUSG00000070939	ENSMUST00000189010			Tgfbrap1			protein_coding
e11ve16_common_569	chr1	43098155	43098962	+	0.69754	NA	promoter-TSS (ENSMUST00000010434.7)	protein_coding-promoter-TSS (ENSMUST00000010434.7)	50	ENSMUST00000190427.6	ENSMUSG00000070939	ENSMUST00000189010			Tgfbrap1			protein_coding
e11ve16_common_570	chr1	43139740	43140079	+	0.03741	NA	intron (ENSMUST00000187357.1, intron 2 of 2)	protein_coding-intron (ENSMUST00000008280.13, intron 3 of 5)	24052	ENSMUST00000008280.13	ENSMUSG00000008136	ENSMUST00000187357			Fhl2			protein_coding
e11ve16_common_571	chr1	43163357	43164345	+	0.88408	NA	exon (ENSMUST00000008280.13, exon 1 of 6)	protein_coding-exon (ENSMUST00000008280.13, exon 1 of 6)	110	ENSMUST00000008280.13	ENSMUSG00000008136	ENSMUST00000187357			Fhl2			protein_coding
e11ve16_common_572	chr1	43216038	43216369	+	0.05214	NA	Intergenic	Intergenic	-19219	ENSMUST00000185893.1	ENSMUSG00000008136	ENSMUST00000187357			Fhl2			protein_coding
e11ve16_common_573	chr1	43299397	43299950	+	0.07316	NA	intron (ENSMUST00000189899.1, intron 2 of 5)	lncRNA-intron (ENSMUST00000189899.1, intron 2 of 5)	3252	ENSMUST00000189899.1	ENSMUSG00000099576	ENSMUST00000189899			Gm29040			lncRNA
e11ve16_common_574	chr1	43305354	43306856	+	0.50155	NA	Intergenic	Intergenic	-3180	ENSMUST00000189899.1	ENSMUSG00000099576	ENSMUST00000189899			Gm29040			lncRNA
e11ve16_common_575	chr1	43445004	43446910	+	0.36817	NA	exon (ENSMUST00000086421.8, exon 1 of 5)	protein_coding-exon (ENSMUST00000086421.8, exon 1 of 5)	206	ENSMUST00000086421.8	ENSMUSG00000066877	ENSMUST00000202540			Nck2			protein_coding
e11ve16_common_576	chr1	43463709	43464162	+	0.6587	NA	intron (ENSMUST00000086421.8, intron 1 of 4)	protein_coding-intron (ENSMUST00000086421.8, intron 1 of 4)	6662	ENSMUST00000124817.1	ENSMUSG00000066877	ENSMUST00000202540			Nck2			protein_coding
e11ve16_common_577	chr1	43464432	43464664	+	0.94944	NA	intron (ENSMUST00000086421.8, intron 1 of 4)	protein_coding-intron (ENSMUST00000086421.8, intron 1 of 4)	7275	ENSMUST00000124817.1	ENSMUSG00000066877	ENSMUST00000202540			Nck2			protein_coding
e11ve16_common_578	chr1	43471703	43472812	+	0.07366	NA	intron (ENSMUST00000086421.8, intron 1 of 4)	protein_coding-intron (ENSMUST00000086421.8, intron 1 of 4)	14984	ENSMUST00000124817.1	ENSMUSG00000066877	ENSMUST00000202540			Nck2			protein_coding
e11ve16_common_579	chr1	43554884	43555684	+	0.9269	NA	intron (ENSMUST00000086421.8, intron 4 of 4)	protein_coding-intron (ENSMUST00000086421.8, intron 4 of 4)	-4989	ENSMUST00000193169.1	ENSMUSG00000103945	ENSMUST00000193169			Gm38228			TEC
e11ve16_common_580	chr1	43561957	43562808	+	0.68119	NA	TTS (ENSMUST00000193169.1)	TEC-TTS (ENSMUST00000193169.1)	2109	ENSMUST00000193169.1	ENSMUSG00000103945	ENSMUST00000193169			Gm38228			TEC
e11ve16_common_581	chr1	43698418	43698988	+	0.6187	NA	Intergenic	Intergenic	-31899	ENSMUST00000027217.8	ENSMUSG00000026051	ENSMUST00000027217			Ecrg4			protein_coding
e11ve16_common_582	chr1	43783319	43784018	+	0.05965	NA	intron (ENSMUST00000153317.5, intron 1 of 3)	protein_coding-intron (ENSMUST00000076997.12, intron 6 of 14)	-2242	ENSMUST00000163003.1	ENSMUSG00000090243	ENSMUST00000163003			Gm16103			processed_pseudogene
e11ve16_common_583	chr1	43826760	43827826	+	0.97017	NA	promoter-TSS (ENSMUST00000136179.7)	protein_coding-promoter-TSS (ENSMUST00000136179.7)	-277	ENSMUST00000136179.7	ENSMUSG00000057363	ENSMUST00000153317			Uxs1			protein_coding
e11ve16_common_584	chr1	43933235	43933761	+	0.76199	NA	promoter-TSS (ENSMUST00000087933.9)	protein_coding-promoter-TSS (ENSMUST00000087933.9)	-149	ENSMUST00000185579.6	ENSMUSG00000041763	ENSMUST00000186441			Tpp2			protein_coding
e11ve16_common_585	chr1	43933976	43934617	+	1.07156	NA	intron (ENSMUST00000186028.1, intron 1 of 6)	protein_coding-intron (ENSMUST00000087933.9, intron 1 of 29)	251	ENSMUST00000189388.6	ENSMUSG00000041763	ENSMUST00000186441			Tpp2			protein_coding
e11ve16_common_586	chr1	44042010	44042786	+	1.4804	NA	Intergenic	Intergenic	19538	ENSMUST00000168641.1	ENSMUSG00000091844	ENSMUST00000168641			Gm8251			protein_coding
e11ve16_common_587	chr1	44101561	44102253	+	0.59606	NA	promoter-TSS (ENSMUST00000152239.7)	protein_coding-promoter-TSS (ENSMUST00000152239.7)	106	ENSMUST00000127923.7	ENSMUSG00000026049	ENSMUST00000152239			Tex30			protein_coding
e11ve16_common_588	chr1	44102573	44103040	+	1.39339	NA	promoter-TSS (ENSMUST00000027215.11)	protein_coding-promoter-TSS (ENSMUST00000027215.11)	-365	ENSMUST00000150911.7	ENSMUSG00000026049	ENSMUST00000152239			Tex30			protein_coding
e11ve16_common_589	chr1	44118407	44120275	+	0.99668	NA	promoter-TSS (ENSMUST00000027213.13)	protein_coding-promoter-TSS (ENSMUST00000027213.13)	-167	ENSMUST00000186280.1	ENSMUSG00000041684	ENSMUST00000129068			Bivm			protein_coding
e11ve16_common_590	chr1	44147216	44148385	+	0.41903	NA	promoter-TSS (ENSMUST00000027214.3)	protein_coding-promoter-TSS (ENSMUST00000027214.3)	-47	ENSMUST00000131177.7	ENSMUSG00000026048	ENSMUST00000155862			Ercc5			protein_coding
e11ve16_common_591	chr1	44148551	44148941	+	0.93796	NA	exon (ENSMUST00000188376.1, exon 1 of 1)	protein_coding-exon (ENSMUST00000188376.1, exon 1 of 1)	814	ENSMUST00000145406.1	ENSMUSG00000026048	ENSMUST00000155862			Ercc5			protein_coding
e11ve16_common_592	chr1	44198436	44199173	+	0.74696	NA	Intergenic	Intergenic	-13358	ENSMUST00000161563.1	ENSMUSG00000089703	ENSMUST00000161563			Gm15833			processed_pseudogene
e11ve16_common_593	chr1	44551311	44553070	+	0.14933	NA	promoter-TSS (ENSMUST00000161066.7)	protein_coding-promoter-TSS (ENSMUST00000161066.7)	-407	ENSMUST00000161066.7	ENSMUSG00000056870	ENSMUST00000161066			Gulp1			protein_coding
e11ve16_common_594	chr1	45313854	45314190	+	0.06911	NA	intron (ENSMUST00000129611.1, intron 1 of 3)	protein_coding-intron (ENSMUST00000087883.12, intron 1 of 50)	2349	ENSMUST00000198698.1	ENSMUSG00000105211	ENSMUST00000198698			Gm47302			miRNA
e11ve16_common_595	chr1	45502054	45503276	+	0.46952	NA	intron (ENSMUST00000086430.4, intron 1 of 53)	protein_coding-intron (ENSMUST00000086430.4, intron 1 of 53)	617	ENSMUST00000134681.7	ENSMUSG00000026042	ENSMUST00000086430			Col5a2			protein_coding
e11ve16_common_596	chr1	45580258	45581030	+	1.10492	NA	Intergenic	Intergenic	-21382	ENSMUST00000185744.1	ENSMUSG00000100894	ENSMUST00000185744			Gm8304			processed_pseudogene
e11ve16_common_597	chr1	45628087	45628296	+	0.01538	NA	Intergenic	Intergenic	26165	ENSMUST00000185744.1	ENSMUSG00000100894	ENSMUST00000185744			Gm8304			processed_pseudogene
e11ve16_common_598	chr1	45734954	45735575	+	0.80107	NA	Intergenic	Intergenic	-11631	ENSMUST00000083321.1	ENSMUSG00000065255	ENSMUST00000083321			Gm23974			snoRNA
e11ve16_common_599	chr1	45766085	45766387	+	0.09327	NA	Intergenic	Intergenic	-2101	ENSMUST00000187682.1	ENSMUSG00000100843	ENSMUST00000187682			Gm8307			processed_pseudogene
e11ve16_common_600	chr1	45780613	45781645	+	0.70919	NA	Intergenic	Intergenic	8167	ENSMUST00000157139.1	ENSMUSG00000087764	ENSMUST00000157139			Gm23984			ribozyme
e11ve16_common_601	chr1	45794864	45796136	+	1.0337	NA	promoter-TSS (ENSMUST00000142145.1)	protein_coding-promoter-TSS (ENSMUST00000142145.1)	-3	ENSMUST00000142145.1	ENSMUSG00000025995	ENSMUST00000142145			Wdr75			protein_coding
e11ve16_common_602	chr1	45816708	45817027	+	0.0107	NA	intron (ENSMUST00000143737.7, intron 7 of 14)	protein_coding-intron (ENSMUST00000027139.14, intron 13 of 20)	2189	ENSMUST00000135662.7	ENSMUSG00000025995	ENSMUST00000142145			Wdr75			protein_coding
e11ve16_common_603	chr1	45824943	45825435	+	0.54007	NA	Intergenic	Intergenic	2631	ENSMUST00000186651.1	ENSMUSG00000025995	ENSMUST00000142145			Wdr75			protein_coding
e11ve16_common_604	chr1	45865969	45867042	+	0.81301	NA	Intergenic	Intergenic	-8751	ENSMUST00000153604.1	ENSMUSG00000084817	ENSMUST00000153604			Gm5526			processed_pseudogene
e11ve16_common_605	chr1	45905188	45905429	+	0.05298	NA	promoter-TSS (ENSMUST00000190055.1)	processed_pseudogene-promoter-TSS (ENSMUST00000190055.1)	-315	ENSMUST00000190055.1	ENSMUSG00000099381	ENSMUST00000190055			Gm18303			processed_pseudogene
e11ve16_common_606	chr1	45912993	45913919	+	0.07879	NA	intron (ENSMUST00000027137.10, intron 5 of 7)	protein_coding-intron (ENSMUST00000027137.10, intron 5 of 7)	7833	ENSMUST00000190055.1	ENSMUSG00000099381	ENSMUST00000190055			Gm18303			processed_pseudogene
e11ve16_common_607	chr1	45925545	45926419	+	1.14988	NA	promoter-TSS (ENSMUST00000027137.10)	protein_coding-promoter-TSS (ENSMUST00000027137.10)	-373	ENSMUST00000191247.6	ENSMUSG00000025993	ENSMUST00000186755			Slc40a1			protein_coding
e11ve16_common_608	chr1	46018489	46019276	+	0.68565	NA	Intergenic	Intergenic	-6862	ENSMUST00000182781.1	ENSMUSG00000090682	ENSMUST00000182781			Gm3852			processed_pseudogene
e11ve16_common_609	chr1	46066406	46067385	+	0.53949	NA	promoter-TSS (ENSMUST00000238212.1)	protein_coding-promoter-TSS (ENSMUST00000238212.1)	42	ENSMUST00000238212.1	ENSMUSG00000041144	ENSMUST00000238212			Dnah7b			protein_coding
e11ve16_common_610	chr1	46425205	46425858	+	0.63461	NA	promoter-TSS (ENSMUST00000189749.6)	protein_coding-promoter-TSS (ENSMUST00000189749.6)	-61	ENSMUST00000189749.6	ENSMUSG00000101337	ENSMUST00000189749			Dnah7c			protein_coding
e11ve16_common_611	chr1	46852670	46853312	+	0.51005	NA	intron (ENSMUST00000186852.1, intron 1 of 1)	protein_coding-intron (ENSMUST00000027131.5, intron 1 of 9)	1055	ENSMUST00000027131.5	ENSMUSG00000025986	ENSMUST00000027131			Slc39a10			protein_coding
e11ve16_common_612	chr1	46885291	46886502	+	0.41986	NA	intron (ENSMUST00000186852.1, intron 1 of 1)	protein_coding-intron (ENSMUST00000185520.1, intron 1 of 1)	2174	ENSMUST00000185520.1	ENSMUSG00000025986	ENSMUST00000027131			Slc39a10			protein_coding
e11ve16_common_613	chr1	46887322	46888755	+	0.67434	NA	promoter-TSS (ENSMUST00000185520.1)	protein_coding-promoter-TSS (ENSMUST00000185520.1)	32	ENSMUST00000185520.1	ENSMUSG00000025986	ENSMUST00000027131			Slc39a10			protein_coding
e11ve16_common_614	chr1	46894219	46894491	+	2.02057	NA	Intergenic	Intergenic	-1503	ENSMUST00000186852.1	ENSMUSG00000025986	ENSMUST00000027131			Slc39a10			protein_coding
e11ve16_common_615	chr1	46894674	46894920	+	0.99604	NA	Intergenic	Intergenic	-1945	ENSMUST00000186852.1	ENSMUSG00000025986	ENSMUST00000027131			Slc39a10			protein_coding
e11ve16_common_616	chr1	46970451	46970933	+	0.09441	NA	Intergenic	Intergenic	-73813	ENSMUST00000185210.1	ENSMUSG00000100160	ENSMUST00000185210			Gm28527			processed_pseudogene
e11ve16_common_617	chr1	47629335	47630155	+	0.47339	NA	Intergenic	Intergenic	23749	ENSMUST00000194762.1	ENSMUSG00000104067	ENSMUST00000194762			Gm37196			TEC
e11ve16_common_618	chr1	50682816	50683610	+	0.14856	NA	Intergenic	Intergenic	123451	ENSMUST00000122582.1	ENSMUSG00000084531	ENSMUST00000122582			Gm25843			misc_RNA
e11ve16_common_619	chr1	50926618	50928238	+	1.17739	NA	promoter-TSS (ENSMUST00000081851.3)	protein_coding-promoter-TSS (ENSMUST00000081851.3)	-91	ENSMUST00000081851.3	ENSMUSG00000026109	ENSMUST00000114565			Tmeff2			protein_coding
e11ve16_common_620	chr1	51241897	51242720	+	0.24474	NA	intron (ENSMUST00000189867.1, intron 4 of 4)	lncRNA-intron (ENSMUST00000189867.1, intron 4 of 4)	-46818	ENSMUST00000051572.7	ENSMUSG00000045954	ENSMUST00000051572			Cavin2			protein_coding
e11ve16_common_621	chr1	51288333	51288946	+	1.79154	NA	promoter-TSS (ENSMUST00000051572.7)	protein_coding-promoter-TSS (ENSMUST00000051572.7)	-487	ENSMUST00000051572.7	ENSMUSG00000045954	ENSMUST00000051572			Cavin2			protein_coding
e11ve16_common_622	chr1	51289622	51289958	+	1.34493	NA	exon (ENSMUST00000051572.7, exon 1 of 2)	protein_coding-exon (ENSMUST00000051572.7, exon 1 of 2)	664	ENSMUST00000051572.7	ENSMUSG00000045954	ENSMUST00000051572			Cavin2			protein_coding
e11ve16_common_623	chr1	51333375	51334110	+	1.17951	NA	promoter-TSS (ENSMUST00000189867.1)	lncRNA-promoter-TSS (ENSMUST00000189867.1)	37	ENSMUST00000189867.1	ENSMUSG00000101799	ENSMUST00000189867			9330175M20Rik			lncRNA
e11ve16_common_624	chr1	51477577	51478308	+	1.04786	NA	exon (ENSMUST00000027279.11, exon 1 of 6)	protein_coding-exon (ENSMUST00000027279.11, exon 1 of 6)	125	ENSMUST00000186003.6	ENSMUSG00000026107	ENSMUST00000189542			Nabp1			protein_coding
e11ve16_common_625	chr1	51508628	51509927	+	0.18091	NA	TTS (ENSMUST00000189410.1)	lncRNA-TTS (ENSMUST00000189410.1)	3052	ENSMUST00000190169.1	ENSMUSG00000099413	ENSMUST00000190169			Gm17767			lncRNA
e11ve16_common_626	chr1	51529926	51530435	+	0.88888	NA	promoter-TSS (ENSMUST00000194442.1)	TEC-promoter-TSS (ENSMUST00000194442.1)	-811	ENSMUST00000194442.1	ENSMUSG00000103424	ENSMUST00000194442			Gm37535			TEC
e11ve16_common_627	chr1	51530679	51531513	+	0.86585	NA	intron (ENSMUST00000189410.1, intron 3 of 3)	lncRNA-intron (ENSMUST00000189410.1, intron 3 of 3)	-1727	ENSMUST00000194442.1	ENSMUSG00000103424	ENSMUST00000194442			Gm37535			TEC
e11ve16_common_628	chr1	51596744	51597675	+	0.15578	NA	promoter-TSS (ENSMUST00000189410.1)	lncRNA-promoter-TSS (ENSMUST00000189410.1)	-491	ENSMUST00000189410.1	ENSMUSG00000099413	ENSMUST00000190169			Gm17767			lncRNA
e11ve16_common_629	chr1	51643370	51643657	+	1.4189	NA	Intergenic	Intergenic	-46795	ENSMUST00000189410.1	ENSMUSG00000099413	ENSMUST00000190169			Gm17767			lncRNA
e11ve16_common_630	chr1	51687606	51688352	+	0.43898	NA	Intergenic	Intergenic	9921	ENSMUST00000189576.1	ENSMUSG00000101741	ENSMUST00000189576			Gm28055			lncRNA
e11ve16_common_631	chr1	51697184	51697780	+	0.52704	NA	exon (ENSMUST00000186769.1, exon 2 of 2)	lncRNA-exon (ENSMUST00000186769.1, exon 2 of 2)	418	ENSMUST00000189576.1	ENSMUSG00000101741	ENSMUST00000189576			Gm28055			lncRNA
e11ve16_common_632	chr1	51720064	51720486	+	0.10944	NA	intron (ENSMUST00000186769.1, intron 1 of 1)	lncRNA-intron (ENSMUST00000186769.1, intron 1 of 1)	-22375	ENSMUST00000189576.1	ENSMUSG00000101741	ENSMUST00000189576			Gm28055			lncRNA
e11ve16_common_633	chr1	51747732	51748485	+	1.05844	NA	Intergenic	Intergenic	-1165	ENSMUST00000186769.1	ENSMUSG00000101741	ENSMUST00000189576			Gm28055			lncRNA
e11ve16_common_634	chr1	51848890	51850116	+	0.58382	NA	promoter-TSS (ENSMUST00000186428.1)	lncRNA-promoter-TSS (ENSMUST00000186428.1)	-385	ENSMUST00000186428.1	ENSMUSG00000101724	ENSMUST00000186428			Gm29453			lncRNA
e11ve16_common_635	chr1	51856403	51856782	+	2.21725	NA	intron (ENSMUST00000018561.13, intron 3 of 30)	protein_coding-intron (ENSMUST00000018561.13, intron 3 of 30)	-5486	ENSMUST00000123299.1	ENSMUSG00000018417	ENSMUST00000114541			Myo1b			protein_coding
e11ve16_common_636	chr1	51856900	51857204	+	2.27092	NA	intron (ENSMUST00000018561.13, intron 3 of 30)	protein_coding-intron (ENSMUST00000018561.13, intron 3 of 30)	-5946	ENSMUST00000123299.1	ENSMUSG00000018417	ENSMUST00000114541			Myo1b			protein_coding
e11ve16_common_637	chr1	51893975	51894271	+	0.68862	NA	intron (ENSMUST00000151525.7, intron 1 of 6)	protein_coding-intron (ENSMUST00000018561.13, intron 1 of 30)	2178	ENSMUST00000144694.1	ENSMUSG00000018417	ENSMUST00000114541			Myo1b			protein_coding
e11ve16_common_638	chr1	51915658	51916210	+	0.48954	NA	promoter-TSS (ENSMUST00000018561.13)	protein_coding-promoter-TSS (ENSMUST00000018561.13)	-6	ENSMUST00000018561.13	ENSMUSG00000018417	ENSMUST00000114541			Myo1b			protein_coding
e11ve16_common_639	chr1	51944575	51945019	+	0.04661	NA	Intergenic	Intergenic	-3536	ENSMUST00000097103.4	ENSMUSG00000072324	ENSMUST00000097103			Gm8420			processed_pseudogene
e11ve16_common_640	chr1	51996329	51997433	+	0.72435	NA	intron (ENSMUST00000168302.7, intron 2 of 24)	protein_coding-intron (ENSMUST00000168302.7, intron 2 of 24)	9733	ENSMUST00000168302.7	ENSMUSG00000062939	ENSMUST00000187053			Stat4			protein_coding
e11ve16_common_641	chr1	52008373	52009121	+	0.04439	NA	intron (ENSMUST00000187053.1, intron 1 of 4)	protein_coding-intron (ENSMUST00000027277.6, intron 1 of 23)	121	ENSMUST00000187053.1	ENSMUSG00000062939	ENSMUST00000187053			Stat4			protein_coding
e11ve16_common_642	chr1	52088589	52089194	+	1.81046	NA	intron (ENSMUST00000168302.7, intron 15 of 24)	protein_coding-intron (ENSMUST00000027277.6, intron 14 of 23)	2175	ENSMUST00000105087.1	ENSMUSG00000078291	ENSMUST00000105087			Gm3940			processed_pseudogene
e11ve16_common_643	chr1	52102797	52103584	+	0.82467	NA	intron (ENSMUST00000185516.1, intron 11 of 33)	protein_coding-intron (ENSMUST00000027277.6, intron 21 of 23)	-2259	ENSMUST00000187554.1	ENSMUSG00000062939	ENSMUST00000187053			Stat4			protein_coding
e11ve16_common_644	chr1	52113351	52114047	+	0.76603	NA	promoter-TSS (ENSMUST00000210323.1)	lncRNA-promoter-TSS (ENSMUST00000210323.1)	52	ENSMUST00000210323.1	ENSMUSG00000109599	ENSMUST00000210323			Gm31812			lncRNA
e11ve16_common_645	chr1	52118984	52119455	+	0.80781	NA	promoter-TSS (ENSMUST00000070968.13)	protein_coding-promoter-TSS (ENSMUST00000070968.13)	-221	ENSMUST00000186574.6	ENSMUSG00000026104	ENSMUST00000191435			Stat1			protein_coding
e11ve16_common_646	chr1	52119854	52120079	+	1.49453	NA	exon (ENSMUST00000070968.13, exon 2 of 25)	protein_coding-exon (ENSMUST00000070968.13, exon 2 of 25)	342	ENSMUST00000186057.6	ENSMUSG00000026104	ENSMUST00000191435			Stat1			protein_coding
e11ve16_common_647	chr1	52146522	52146963	+	0.31029	NA	intron (ENSMUST00000185516.1, intron 26 of 33)	protein_coding-intron (ENSMUST00000070968.13, intron 15 of 24)	-3362	ENSMUST00000189075.1	ENSMUSG00000026104	ENSMUST00000191435			Stat1			protein_coding
e11ve16_common_648	chr1	52232185	52233689	+	0.45034	NA	promoter-TSS (ENSMUST00000114512.7)	protein_coding-promoter-TSS (ENSMUST00000114512.7)	-126	ENSMUST00000142976.1	ENSMUSG00000026103	ENSMUST00000148917			Gls			protein_coding
e11ve16_common_649	chr1	52302773	52303030	+	0.12397	NA	Intergenic	Intergenic	-13806	ENSMUST00000185256.1	ENSMUSG00000099648	ENSMUST00000185256			Gm5975			processed_pseudogene
e11ve16_common_650	chr1	52499715	52501673	+	0.60947	NA	promoter-TSS (ENSMUST00000069792.13)	protein_coding-promoter-TSS (ENSMUST00000069792.13)	-15	ENSMUST00000069792.13	ENSMUSG00000002881	ENSMUST00000170269			Nab1			protein_coding
e11ve16_common_651	chr1	52581709	52581961	+	1.76066	NA	intron (ENSMUST00000189527.1, intron 4 of 4)	lncRNA-intron (ENSMUST00000189527.1, intron 4 of 4)	-1544	ENSMUST00000188544.1	ENSMUSG00000099878	ENSMUST00000188544			Gm28178			lncRNA
e11ve16_common_652	chr1	52597430	52598350	+	0.70934	NA	Intergenic	Intergenic	13372	ENSMUST00000179821.2	ENSMUSG00000100007	ENSMUST00000179821			Gm5527			processed_pseudogene
e11ve16_common_653	chr1	52630526	52631788	+	0.75485	NA	exon (ENSMUST00000190108.6, exon 1 of 4)	protein_coding-exon (ENSMUST00000190108.6, exon 1 of 4)	360	ENSMUST00000185790.6	ENSMUSG00000043015	ENSMUST00000165859			Nemp2			protein_coding
e11ve16_common_654	chr1	52640274	52640851	+	0.98731	NA	promoter-TSS (ENSMUST00000186903.6)	protein_coding-promoter-TSS (ENSMUST00000186903.6)	-954	ENSMUST00000186903.6	ENSMUSG00000043015	ENSMUST00000165859			Nemp2			protein_coding
e11ve16_common_655	chr1	52683137	52684260	+	1.00911	NA	intron (ENSMUST00000156876.7, intron 2 of 6)	protein_coding-intron (ENSMUST00000087701.3, intron 2 of 5)	-14347	ENSMUST00000149887.1	ENSMUSG00000041439	ENSMUST00000087701			Mfsd6			protein_coding
e11ve16_common_656	chr1	52726292	52727238	+	0.70887	NA	intron (ENSMUST00000147421.1, intron 1 of 2)	protein_coding-intron (ENSMUST00000087701.3, intron 1 of 5)	593	ENSMUST00000147421.1	ENSMUSG00000041439	ENSMUST00000087701			Mfsd6			protein_coding
e11ve16_common_657	chr1	52727353	52727706	+	0.48888	NA	promoter-TSS (ENSMUST00000087701.3)	protein_coding-promoter-TSS (ENSMUST00000087701.3)	-67	ENSMUST00000087701.3	ENSMUSG00000041439	ENSMUST00000087701			Mfsd6			protein_coding
e11ve16_common_658	chr1	52816810	52817993	+	0.58234	NA	promoter-TSS (ENSMUST00000162351.1)	protein_coding-promoter-TSS (ENSMUST00000162351.1)	50	ENSMUST00000162351.1	ENSMUSG00000026102	ENSMUST00000162576			Inpp1			protein_coding
e11ve16_common_659	chr1	52844433	52844654	+	0.44302	NA	promoter-TSS (ENSMUST00000044478.6)	protein_coding-promoter-TSS (ENSMUST00000044478.6)	-386	ENSMUST00000186922.1	ENSMUSG00000041426	ENSMUST00000161125			Hibch			protein_coding
e11ve16_common_660	chr1	52845063	52845692	+	1.64566	NA	exon (ENSMUST00000186922.1, exon 1 of 1)	protein_coding-exon (ENSMUST00000186922.1, exon 1 of 1)	331	ENSMUST00000044478.6	ENSMUSG00000041426	ENSMUST00000161125			Hibch			protein_coding
e11ve16_common_661	chr1	52952299	52953591	+	0.5213	NA	promoter-TSS (ENSMUST00000050567.10)	protein_coding-promoter-TSS (ENSMUST00000050567.10)	-101	ENSMUST00000050567.10	ENSMUSG00000043629	ENSMUST00000050567			1700019D03Rik			protein_coding
e11ve16_common_662	chr1	53017961	53018431	+	0.46343	NA	intron (ENSMUST00000191441.1, intron 1 of 1)	protein_coding-intron (ENSMUST00000191441.1, intron 1 of 1)	1983	ENSMUST00000191441.1	ENSMUSG00000043629	ENSMUST00000050567			1700019D03Rik			protein_coding
e11ve16_common_663	chr1	53296573	53296982	+	0.60506	NA	promoter-TSS (ENSMUST00000027266.3)	protein_coding-promoter-TSS (ENSMUST00000027266.3)	190	ENSMUST00000142922.1	ENSMUSG00000026098	ENSMUST00000133358			Pms1			protein_coding
e11ve16_common_664	chr1	53313163	53314084	+	0.55922	NA	promoter-TSS (ENSMUST00000027265.9)	protein_coding-promoter-TSS (ENSMUST00000027265.9)	-1	ENSMUST00000027265.9	ENSMUSG00000026096	ENSMUST00000153939			Osgepl1			protein_coding
e11ve16_common_665	chr1	53352004	53352976	+	0.55799	NA	promoter-TSS (ENSMUST00000136468.1)	protein_coding-promoter-TSS (ENSMUST00000136468.1)	80	ENSMUST00000136468.1	ENSMUSG00000026095	ENSMUST00000123519			Asnsd1			protein_coding
e11ve16_common_666	chr1	53394197	53394452	+	0.17187	NA	Intergenic	Intergenic	3909	ENSMUST00000190697.1	ENSMUSG00000100069	ENSMUST00000190697			Gm6801			unprocessed_pseudogene
e11ve16_common_667	chr1	53646325	53646790	+	0.47379	NA	intron (ENSMUST00000094964.6, intron 9 of 65)	protein_coding-intron (ENSMUST00000094964.6, intron 9 of 65)	60204	ENSMUST00000094964.6	ENSMUSG00000096141	ENSMUST00000094964			Dnah7a			protein_coding
e11ve16_common_668	chr1	53706367	53707149	+	0.23909	NA	promoter-TSS (ENSMUST00000094964.6)	protein_coding-promoter-TSS (ENSMUST00000094964.6)	3	ENSMUST00000094964.6	ENSMUSG00000096141	ENSMUST00000094964			Dnah7a			protein_coding
e11ve16_common_669	chr1	53728577	53729243	+	0.1732	NA	Intergenic	Intergenic	-22126	ENSMUST00000189677.1	ENSMUSG00000096141	ENSMUST00000094964			Dnah7a			protein_coding
e11ve16_common_670	chr1	53784293	53784959	+	0.3068	NA	intron (ENSMUST00000027263.13, intron 1 of 7)	protein_coding-intron (ENSMUST00000027263.13, intron 1 of 7)	531	ENSMUST00000185920.1	ENSMUSG00000026094	ENSMUST00000027263			Stk17b			protein_coding
e11ve16_common_671	chr1	53785205	53785628	+	0.24478	NA	promoter-TSS (ENSMUST00000027263.13)	protein_coding-promoter-TSS (ENSMUST00000027263.13)	-192	ENSMUST00000027263.13	ENSMUSG00000026094	ENSMUST00000027263			Stk17b			protein_coding
e11ve16_common_672	chr1	53823592	53824442	+	1.66499	NA	intron (ENSMUST00000087659.10, intron 28 of 28)	protein_coding-intron (ENSMUST00000087659.10, intron 28 of 28)	17154	ENSMUST00000150677.7	ENSMUSG00000042807	ENSMUST00000146850			Hecw2			protein_coding
e11ve16_common_673	chr1	53838670	53839211	+	0.12325	NA	TTS (ENSMUST00000152870.1)	protein_coding-TTS (ENSMUST00000152870.1)	2231	ENSMUST00000150677.7	ENSMUSG00000042807	ENSMUST00000146850			Hecw2			protein_coding
e11ve16_common_674	chr1	53846406	53846786	+	0.52084	NA	intron (ENSMUST00000152870.1, intron 4 of 5)	protein_coding-intron (ENSMUST00000087659.10, intron 21 of 28)	-2828	ENSMUST00000184834.1	ENSMUSG00000098443	ENSMUST00000184834			Mir7681			miRNA
e11ve16_common_675	chr1	54187596	54187912	+	1.61731	NA	intron (ENSMUST00000146850.1, intron 1 of 3)	protein_coding-intron (ENSMUST00000087659.10, intron 1 of 28)	6294	ENSMUST00000120904.7	ENSMUSG00000042807	ENSMUST00000146850			Hecw2			protein_coding
e11ve16_common_676	chr1	54194200	54194779	+	1.41211	NA	promoter-TSS (ENSMUST00000120904.7)	protein_coding-promoter-TSS (ENSMUST00000120904.7)	-441	ENSMUST00000120904.7	ENSMUSG00000042807	ENSMUST00000146850			Hecw2			protein_coding
e11ve16_common_677	chr1	54194984	54195228	+	1.65629	NA	promoter-TSS (ENSMUST00000087659.10)	protein_coding-promoter-TSS (ENSMUST00000087659.10)	62	ENSMUST00000146850.1	ENSMUSG00000042807	ENSMUST00000146850			Hecw2			protein_coding
e11ve16_common_678	chr1	54250120	54251183	+	0.51232	NA	promoter-TSS (ENSMUST00000027128.10)	protein_coding-promoter-TSS (ENSMUST00000027128.10)	-32	ENSMUST00000161988.1	ENSMUSG00000025983	ENSMUST00000160472			Ccdc150			protein_coding
e11ve16_common_679	chr1	54438424	54439267	+	0.09541	NA	exon (ENSMUST00000041638.7, exon 1 of 18)	protein_coding-exon (ENSMUST00000041638.7, exon 1 of 18)	126	ENSMUST00000041638.7	ENSMUSG00000041303	ENSMUST00000041638			Gtf3c3			protein_coding
e11ve16_common_680	chr1	54556948	54558123	+	0.86846	NA	promoter-TSS (ENSMUST00000189506.1)	protein_coding-promoter-TSS (ENSMUST00000189506.1)	92	ENSMUST00000189506.1	ENSMUSG00000073678	ENSMUST00000097739			Pgap1			protein_coding
e11ve16_common_681	chr1	54612267	54613368	+	1.37384	NA	Intergenic	Intergenic	35796	ENSMUST00000189563.1	ENSMUSG00000052331	ENSMUST00000180327			Ankrd44			protein_coding
e11ve16_common_682	chr1	54640270	54641063	+	0.06668	NA	Intergenic	Intergenic	7947	ENSMUST00000189563.1	ENSMUSG00000052331	ENSMUST00000180327			Ankrd44			protein_coding
e11ve16_common_683	chr1	54830072	54830616	+	0.84158	NA	intron (ENSMUST00000180327.7, intron 1 of 7)	protein_coding-intron (ENSMUST00000044359.15, intron 1 of 27)	-16901	ENSMUST00000178905.1	ENSMUSG00000052331	ENSMUST00000180327			Ankrd44			protein_coding
e11ve16_common_684	chr1	54867568	54867812	+	0.42724	NA	intron (ENSMUST00000180327.7, intron 1 of 7)	protein_coding-intron (ENSMUST00000044359.15, intron 1 of 27)	17021	ENSMUST00000177679.1	ENSMUSG00000052331	ENSMUST00000180327			Ankrd44			protein_coding
e11ve16_common_685	chr1	54872984	54873398	+	1.26216	NA	intron (ENSMUST00000180327.7, intron 1 of 7)	protein_coding-intron (ENSMUST00000044359.15, intron 1 of 27)	11520	ENSMUST00000177679.1	ENSMUSG00000052331	ENSMUST00000180327			Ankrd44			protein_coding
e11ve16_common_686	chr1	54881408	54882590	+	0.2584	NA	intron (ENSMUST00000180327.7, intron 1 of 7)	protein_coding-intron (ENSMUST00000044359.15, intron 1 of 27)	2712	ENSMUST00000177679.1	ENSMUSG00000052331	ENSMUST00000180327			Ankrd44			protein_coding
e11ve16_common_687	chr1	54925584	54926015	+	0.44242	NA	intron (ENSMUST00000180327.7, intron 1 of 7)	protein_coding-intron (ENSMUST00000044359.15, intron 1 of 27)	555	ENSMUST00000178935.7	ENSMUSG00000052331	ENSMUST00000180327			Ankrd44			protein_coding
e11ve16_common_688	chr1	54926391	54927035	+	0.60509	NA	promoter-TSS (ENSMUST00000044359.15)	protein_coding-promoter-TSS (ENSMUST00000044359.15)	-326	ENSMUST00000044359.15	ENSMUSG00000052331	ENSMUST00000180327			Ankrd44			protein_coding
e11ve16_common_689	chr1	54983274	54983575	+	0.07502	NA	Intergenic	Intergenic	7691	ENSMUST00000190175.1	ENSMUSG00000025982	ENSMUST00000188419			Sf3b1			protein_coding
e11ve16_common_690	chr1	55026523	55027815	+	0.55777	NA	intron (ENSMUST00000191303.1, intron 1 of 6)	protein_coding-intron (ENSMUST00000027127.13, intron 1 of 24)	204	ENSMUST00000189051.1	ENSMUSG00000025982	ENSMUST00000188419			Sf3b1			protein_coding
e11ve16_common_691	chr1	55052249	55052513	+	1.16142	NA	promoter-TSS (ENSMUST00000027125.6)	protein_coding-promoter-TSS (ENSMUST00000027125.6)	-389	ENSMUST00000027125.6	ENSMUSG00000025981	ENSMUST00000087617			Coq10b			protein_coding
e11ve16_common_692	chr1	55053154	55053421	+	0.60767	NA	promoter-TSS (ENSMUST00000193614.1)	TEC-promoter-TSS (ENSMUST00000193614.1)	-175	ENSMUST00000193614.1	ENSMUSG00000103030	ENSMUST00000193614			E330011M16Rik			TEC
e11ve16_common_693	chr1	55087255	55087836	+	0.54449	NA	promoter-TSS (ENSMUST00000075242.6)	protein_coding-promoter-TSS (ENSMUST00000075242.6)	479	ENSMUST00000027123.14	ENSMUSG00000025980	ENSMUST00000027123			Hspd1			protein_coding
e11ve16_common_694	chr1	55088238	55088614	+	1.27538	NA	promoter-TSS (ENSMUST00000027123.14)	protein_coding-promoter-TSS (ENSMUST00000027123.14)	112	ENSMUST00000134628.1	ENSMUSG00000073676	ENSMUST00000075242			Hspe1			protein_coding
e11ve16_common_695	chr1	55131040	55131930	+	0.81936	NA	exon (ENSMUST00000162553.1, exon 1 of 8)	protein_coding-exon (ENSMUST00000162553.1, exon 1 of 8)	159	ENSMUST00000159743.1	ENSMUSG00000025979	ENSMUST00000159311			Mob4			protein_coding
e11ve16_common_696	chr1	55213080	55214122	+	0.43348	NA	intron (ENSMUST00000114428.2, intron 2 of 5)	protein_coding-intron (ENSMUST00000027121.14, intron 2 of 8)	-7112	ENSMUST00000133294.1	ENSMUSG00000025978	ENSMUST00000114428			Rftn2			protein_coding
e11ve16_common_697	chr1	55226404	55226758	+	0.32525	NA	exon (ENSMUST00000027121.14, exon 1 of 9)	protein_coding-exon (ENSMUST00000027121.14, exon 1 of 9)	201	ENSMUST00000132055.7	ENSMUSG00000025978	ENSMUST00000114428			Rftn2			protein_coding
e11ve16_common_698	chr1	55236825	55237960	+	0.67614	NA	exon (ENSMUST00000061334.9, exon 1 of 1)	protein_coding-exon (ENSMUST00000061334.9, exon 1 of 1)	215	ENSMUST00000061334.9	ENSMUSG00000046994	ENSMUST00000061334			Mars2			protein_coding
e11ve16_common_699	chr1	55363148	55363974	+	0.52003	NA	promoter-TSS (ENSMUST00000087585.9)	protein_coding-promoter-TSS (ENSMUST00000087585.9)	-92	ENSMUST00000159398.1	ENSMUSG00000025977	ENSMUST00000161810			Boll			protein_coding
e11ve16_common_700	chr1	55405584	55406376	+	1.14692	NA	promoter-TSS (ENSMUST00000042986.9)	protein_coding-promoter-TSS (ENSMUST00000042986.9)	59	ENSMUST00000042986.9	ENSMUSG00000038349	ENSMUST00000042986			Plcl1			protein_coding
e11ve16_common_701	chr1	55406623	55406867	+	2.32266	NA	intron (ENSMUST00000042986.9, intron 1 of 5)	protein_coding-intron (ENSMUST00000042986.9, intron 1 of 5)	824	ENSMUST00000042986.9	ENSMUSG00000038349	ENSMUST00000042986			Plcl1			protein_coding
e11ve16_common_702	chr1	55446179	55446560	+	1.49037	NA	TTS (ENSMUST00000193928.1)	TEC-TTS (ENSMUST00000193928.1)	-1345	ENSMUST00000186507.1	ENSMUSG00000100309	ENSMUST00000186507			Gm6644			processed_pseudogene
e11ve16_common_703	chr1	55500627	55500883	+	2.52384	NA	intron (ENSMUST00000042986.9, intron 1 of 5)	protein_coding-intron (ENSMUST00000042986.9, intron 1 of 5)	-55731	ENSMUST00000186507.1	ENSMUSG00000100309	ENSMUST00000186507			Gm6644			processed_pseudogene
e11ve16_common_704	chr1	55511694	55511996	+	0.08979	NA	intron (ENSMUST00000042986.9, intron 1 of 5)	protein_coding-intron (ENSMUST00000042986.9, intron 1 of 5)	-47615	ENSMUST00000193032.1	ENSMUSG00000102831	ENSMUST00000193032			Gm37382			TEC
e11ve16_common_705	chr1	55575864	55576548	+	0.54511	NA	intron (ENSMUST00000042986.9, intron 1 of 5)	protein_coding-intron (ENSMUST00000042986.9, intron 1 of 5)	16746	ENSMUST00000193032.1	ENSMUSG00000102831	ENSMUST00000193032			Gm37382			TEC
e11ve16_common_706	chr1	55874148	55874721	+	0.13027	NA	Intergenic	Intergenic	-56807	ENSMUST00000189293.1	ENSMUSG00000099950	ENSMUST00000188040			9130227L01Rik			lncRNA
e11ve16_common_707	chr1	55888147	55889555	+	0.32132	NA	Intergenic	Intergenic	-42390	ENSMUST00000189293.1	ENSMUSG00000099950	ENSMUST00000188040			9130227L01Rik			lncRNA
e11ve16_common_708	chr1	56896668	56897112	+	0.41368	NA	intron (ENSMUST00000114415.9, intron 5 of 10)	protein_coding-intron (ENSMUST00000042857.13, intron 4 of 9)	72950	ENSMUST00000176759.1	ENSMUSG00000038331	ENSMUST00000177424			Satb2			protein_coding
e11ve16_common_709	chr1	56971697	56972496	+	0.52795	NA	promoter-TSS (ENSMUST00000114415.9)	protein_coding-promoter-TSS (ENSMUST00000114415.9)	-236	ENSMUST00000195462.1	ENSMUSG00000087022	ENSMUST00000187858			9130024F11Rik			lncRNA
e11ve16_common_710	chr1	56972739	56973735	+	0.69486	NA	promoter-TSS (ENSMUST00000042857.13)	protein_coding-promoter-TSS (ENSMUST00000042857.13)	-735	ENSMUST00000042857.13	ENSMUSG00000038331	ENSMUST00000177424			Satb2			protein_coding
e11ve16_common_711	chr1	56977371	56977740	+	0.51942	NA	exon (ENSMUST00000195287.1, exon 1 of 1)	TEC-exon (ENSMUST00000195287.1, exon 1 of 1)	752	ENSMUST00000195287.1	ENSMUSG00000104310	ENSMUST00000195287			Gm4081			TEC
e11ve16_common_712	chr1	57078189	57078881	+	1.55042	NA	Intergenic	Intergenic	38142	ENSMUST00000187858.1	ENSMUSG00000087022	ENSMUST00000187858			9130024F11Rik			lncRNA
e11ve16_common_713	chr1	57205128	57206067	+	0.39534	NA	intron (ENSMUST00000190488.1, intron 5 of 6)	lncRNA-intron (ENSMUST00000190488.1, intron 5 of 6)	9396	ENSMUST00000190488.1	ENSMUSG00000101429	ENSMUST00000190488			BC055402			lncRNA
e11ve16_common_714	chr1	57377197	57377562	+	0.7243	NA	promoter-TSS (ENSMUST00000042734.2)	protein_coding-promoter-TSS (ENSMUST00000042734.2)	165	ENSMUST00000181949.2	ENSMUSG00000097519	ENSMUST00000181949			4930558J18Rik			lncRNA
e11ve16_common_715	chr1	57378014	57378323	+	1.61308	NA	promoter-TSS (ENSMUST00000181949.2)	lncRNA-promoter-TSS (ENSMUST00000181949.2)	528	ENSMUST00000187255.1	ENSMUSG00000038323	ENSMUST00000042734			1700066M21Rik			protein_coding
e11ve16_common_716	chr1	57406058	57407242	+	0.7951	NA	promoter-TSS (ENSMUST00000079998.12)	protein_coding-promoter-TSS (ENSMUST00000079998.12)	24	ENSMUST00000079998.12	ENSMUSG00000048495	ENSMUST00000161727			Tyw5			protein_coding
e11ve16_common_717	chr1	57429128	57429477	+	0.21875	NA	Intergenic	Intergenic	-6929	ENSMUST00000104588.1	ENSMUSG00000077776	ENSMUST00000104588			Gm22371			snoRNA
e11ve16_common_718	chr1	57613112	57613587	+	0.11564	NA	Intergenic	Intergenic	-49298	ENSMUST00000186851.1	ENSMUSG00000101151	ENSMUST00000186851			Gm17929			processed_pseudogene
e11ve16_common_719	chr1	57716861	57717475	+	1.0605	NA	Intergenic	Intergenic	-56994	ENSMUST00000172287.7	ENSMUSG00000038305	ENSMUST00000165235			Spats2l			protein_coding
e11ve16_common_720	chr1	57774081	57774802	+	1.73087	NA	promoter-TSS (ENSMUST00000163239.7)	protein_coding-promoter-TSS (ENSMUST00000163239.7)	22	ENSMUST00000163922.1	ENSMUSG00000038305	ENSMUST00000165235			Spats2l			protein_coding
e11ve16_common_721	chr1	57775125	57775721	+	0.79972	NA	intron (ENSMUST00000168895.1, intron 1 of 1)	protein_coding-intron (ENSMUST00000163239.7, intron 1 of 11)	506	ENSMUST00000168895.1	ENSMUSG00000038305	ENSMUST00000165235			Spats2l			protein_coding
e11ve16_common_722	chr1	57847684	57848220	+	1.3321	NA	intron (ENSMUST00000169772.2, intron 1 of 11)	protein_coding-intron (ENSMUST00000163239.7, intron 2 of 11)	2381	ENSMUST00000169772.2	ENSMUSG00000038305	ENSMUST00000165235			Spats2l			protein_coding
e11ve16_common_723	chr1	57947456	57948456	+	0.24079	NA	TTS (ENSMUST00000163239.7)	protein_coding-TTS (ENSMUST00000163239.7)	14146	ENSMUST00000163006.1	ENSMUSG00000054770	ENSMUST00000114410			Kctd18			protein_coding
e11ve16_common_724	chr1	57969379	57970314	+	0.84315	NA	promoter-TSS (ENSMUST00000161608.7)	protein_coding-promoter-TSS (ENSMUST00000161608.7)	202	ENSMUST00000159826.1	ENSMUSG00000054770	ENSMUST00000114410			Kctd18			protein_coding
e11ve16_common_725	chr1	57995639	57996636	+	0.48783	NA	exon (ENSMUST00000027202.8, exon 1 of 9)	protein_coding-exon (ENSMUST00000027202.8, exon 1 of 9)	166	ENSMUST00000027202.8	ENSMUSG00000026039	ENSMUST00000190746			Sgo2a			protein_coding
e11ve16_common_726	chr1	58029725	58030829	+	0.69726	NA	intron (ENSMUST00000160168.1, intron 1 of 14)	protein_coding-intron (ENSMUST00000001027.6, intron 1 of 34)	313	ENSMUST00000160168.1	ENSMUSG00000063558	ENSMUST00000160168			Aox1			protein_coding
e11ve16_common_727	chr1	58031084	58031331	+	0.57208	NA	intron (ENSMUST00000160168.1, intron 1 of 14)	protein_coding-intron (ENSMUST00000001027.6, intron 1 of 34)	1243	ENSMUST00000160168.1	ENSMUSG00000063558	ENSMUST00000160168			Aox1			protein_coding
e11ve16_common_728	chr1	58148502	58148776	+	0.09002	NA	intron (ENSMUST00000040999.13, intron 12 of 34)	protein_coding-intron (ENSMUST00000040999.13, intron 12 of 34)	6449	ENSMUST00000158650.1	ENSMUSG00000089275	ENSMUST00000158650			Gm24548			snoRNA
e11ve16_common_729	chr1	58307455	58307666	+	0.23277	NA	intron (ENSMUST00000114366.2, intron 16 of 35)	protein_coding-intron (ENSMUST00000114366.2, intron 16 of 35)	8096	ENSMUST00000161126.1	ENSMUSG00000089822	ENSMUST00000161126			Gm15759			lncRNA
e11ve16_common_730	chr1	58392290	58394018	+	0.5728	NA	promoter-TSS (ENSMUST00000186949.1)	protein_coding-promoter-TSS (ENSMUST00000186949.1)	22	ENSMUST00000188630.6	ENSMUSG00000051223	ENSMUST00000188898			Bzw1			protein_coding
e11ve16_common_731	chr1	58423071	58423506	+	0.73541	NA	intron (ENSMUST00000156931.7, intron 1 of 10)	protein_coding-intron (ENSMUST00000034868.13, intron 1 of 12)	778	ENSMUST00000151338.7	ENSMUSG00000026034	ENSMUST00000156931			Clk1			protein_coding
e11ve16_common_732	chr1	58423656	58424322	+	0.85388	NA	promoter-TSS (ENSMUST00000034868.13)	protein_coding-promoter-TSS (ENSMUST00000034868.13)	77	ENSMUST00000151338.7	ENSMUSG00000026034	ENSMUST00000156931			Clk1			protein_coding
e11ve16_common_733	chr1	58444884	58445886	+	0.6737	NA	promoter-TSS (ENSMUST00000114345.8)	protein_coding-promoter-TSS (ENSMUST00000114345.8)	-16	ENSMUST00000114345.8	ENSMUSG00000026035	ENSMUST00000185990			Ppil3			protein_coding
e11ve16_common_734	chr1	58504334	58505359	+	0.81644	NA	promoter-TSS (ENSMUST00000129740.2)	lncRNA-promoter-TSS (ENSMUST00000129740.2)	79	ENSMUST00000190695.1	ENSMUSG00000026037	ENSMUST00000191206			Orc2			protein_coding
e11ve16_common_735	chr1	58585802	58586831	+	0.90829	NA	promoter-TSS (ENSMUST00000027193.8)	protein_coding-promoter-TSS (ENSMUST00000027193.8)	7	ENSMUST00000161600.7	ENSMUSG00000038174	ENSMUST00000159980			Fam126b			protein_coding
e11ve16_common_736	chr1	58652160	58653130	+	0.84778	NA	promoter-TSS (ENSMUST00000185352.1)	transcribed_unprocessed_pseudogene-promoter-TSS (ENSMUST00000185352.1)	4	ENSMUST00000185352.1	ENSMUSG00000102059	ENSMUST00000188643			Gm20257			transcribed_unprocessed_pseudogene
e11ve16_common_737	chr1	58711198	58712738	+	0.55984	NA	intron (ENSMUST00000114313.7, intron 1 of 9)	protein_coding-intron (ENSMUST00000156870.1, intron 1 of 2)	408	ENSMUST00000114313.7	ENSMUSG00000026031	ENSMUST00000123553			Cflar			protein_coding
e11ve16_common_738	chr1	58713320	58713543	+	1.21758	NA	promoter-TSS (ENSMUST00000189858.1)	protein_coding-promoter-TSS (ENSMUST00000189858.1)	114	ENSMUST00000069333.7	ENSMUSG00000026031	ENSMUST00000123553			Cflar			protein_coding
e11ve16_common_739	chr1	58795049	58796379	+	0.13719	NA	exon (ENSMUST00000027189.14, exon 1 of 9)	protein_coding-exon (ENSMUST00000027189.14, exon 1 of 9)	237	ENSMUST00000191201.6	ENSMUSG00000026029	ENSMUST00000165549			Casp8			protein_coding
e11ve16_common_740	chr1	58859247	58860237	+	1.49695	NA	intron (ENSMUST00000188624.1, intron 8 of 11)	unprocessed_pseudogene-intron (ENSMUST00000188624.1, intron 8 of 11)	33050	ENSMUST00000188624.1	ENSMUSG00000099719	ENSMUST00000188624			Gm28802			unprocessed_pseudogene
e11ve16_common_741	chr1	58950892	58951237	+	1.49212	NA	intron (ENSMUST00000173719.1, intron 1 of 1)	protein_coding-intron (ENSMUST00000027186.11, intron 1 of 15)	-4727	ENSMUST00000174120.1	ENSMUSG00000026028	ENSMUST00000173590			Trak2			protein_coding
e11ve16_common_742	chr1	58951382	58951793	+	1.07325	NA	intron (ENSMUST00000173719.1, intron 1 of 1)	protein_coding-intron (ENSMUST00000027186.11, intron 1 of 15)	-5250	ENSMUST00000174120.1	ENSMUSG00000026028	ENSMUST00000173590			Trak2			protein_coding
e11ve16_common_743	chr1	58973111	58974197	+	0.70562	NA	promoter-TSS (ENSMUST00000027186.11)	protein_coding-promoter-TSS (ENSMUST00000027186.11)	132	ENSMUST00000123965.7	ENSMUSG00000026027	ENSMUST00000147637			Stradb			protein_coding
e11ve16_common_744	chr1	59119616	59120518	+	1.41259	NA	promoter-TSS (ENSMUST00000087475.10)	protein_coding-promoter-TSS (ENSMUST00000087475.10)	27	ENSMUST00000094917.9	ENSMUSG00000038079	ENSMUST00000190014			Tmem237			protein_coding
e11ve16_common_745	chr1	59237283	59237492	+	2.4577	NA	promoter-TSS (ENSMUST00000027178.12)	protein_coding-promoter-TSS (ENSMUST00000027178.12)	-156	ENSMUST00000027178.12	ENSMUSG00000026024	ENSMUST00000163058			Als2			protein_coding
e11ve16_common_746	chr1	59237869	59238168	+	1.38451	NA	promoter-TSS (ENSMUST00000027178.12)	protein_coding-promoter-TSS (ENSMUST00000027178.12)	-787	ENSMUST00000027178.12	ENSMUSG00000026024	ENSMUST00000163058			Als2			protein_coding
e11ve16_common_747	chr1	59252991	59253275	+	1.72974	NA	Intergenic	Intergenic	-3773	ENSMUST00000160662.7	ENSMUSG00000026023	ENSMUST00000114248			Cdk15			protein_coding
e11ve16_common_748	chr1	59253465	59253701	+	1.36002	NA	Intergenic	Intergenic	-3323	ENSMUST00000160662.7	ENSMUSG00000026023	ENSMUST00000114248			Cdk15			protein_coding
e11ve16_common_749	chr1	59321266	59322528	+	0.83713	NA	intron (ENSMUST00000162906.1, intron 3 of 4)	protein_coding-intron (ENSMUST00000114248.2, intron 10 of 13)	22961	ENSMUST00000162906.1	ENSMUSG00000026023	ENSMUST00000114248			Cdk15			protein_coding
e11ve16_common_750	chr1	59401160	59401584	+	0.4593	NA	Intergenic	Intergenic	22442	ENSMUST00000187523.1	ENSMUSG00000099922	ENSMUST00000187523			Gm29016			lncRNA
e11ve16_common_751	chr1	59448884	59449759	+	0.38386	NA	exon (ENSMUST00000195013.1, exon 1 of 1)	TEC-exon (ENSMUST00000195013.1, exon 1 of 1)	181	ENSMUST00000195013.1	ENSMUSG00000104502	ENSMUST00000195013			Gm37737			TEC
e11ve16_common_752	chr1	59472586	59473739	+	0.26579	NA	Intergenic	Intergenic	-9262	ENSMUST00000114246.3	ENSMUSG00000041075	ENSMUST00000114246			Fzd7			protein_coding
e11ve16_common_753	chr1	59481305	59482908	+	1.00472	NA	promoter-TSS (ENSMUST00000114246.3)	protein_coding-promoter-TSS (ENSMUST00000114246.3)	-318	ENSMUST00000114246.3	ENSMUSG00000041075	ENSMUST00000114246			Fzd7			protein_coding
e11ve16_common_754	chr1	59491309	59491911	+	0.31809	NA	exon (ENSMUST00000180778.1, exon 2 of 2)	lncRNA-exon (ENSMUST00000180778.1, exon 2 of 2)	995	ENSMUST00000180778.1	ENSMUSG00000097819	ENSMUST00000180778			Gm26813			lncRNA
e11ve16_common_755	chr1	59497597	59497934	+	0.74835	NA	Intergenic	Intergenic	-5160	ENSMUST00000180778.1	ENSMUSG00000097819	ENSMUST00000180778			Gm26813			lncRNA
e11ve16_common_756	chr1	59498222	59498704	+	0.77447	NA	Intergenic	Intergenic	-5858	ENSMUST00000180778.1	ENSMUSG00000097819	ENSMUST00000180778			Gm26813			lncRNA
e11ve16_common_757	chr1	59516031	59517019	+	0.28061	NA	intron (ENSMUST00000114243.7, intron 1 of 19)	protein_coding-intron (ENSMUST00000114243.7, intron 1 of 19)	261	ENSMUST00000114243.7	ENSMUSG00000047361	ENSMUST00000191051			Gm973			protein_coding
e11ve16_common_758	chr1	59579438	59580604	+	1.34485	NA	intron (ENSMUST00000114243.7, intron 11 of 19)	protein_coding-intron (ENSMUST00000114243.7, intron 11 of 19)	-2375	ENSMUST00000212835.1	ENSMUSG00000047361	ENSMUST00000191051			Gm973			protein_coding
e11ve16_common_759	chr1	59670474	59671246	+	1.9338	NA	promoter-TSS (ENSMUST00000091374.8)	protein_coding-promoter-TSS (ENSMUST00000091374.8)	-26	ENSMUST00000091374.8	ENSMUSG00000026021	ENSMUST00000191158			Sumo1			protein_coding
e11ve16_common_760	chr1	59684796	59685676	+	1.21796	NA	intron (ENSMUST00000189327.6, intron 1 of 5)	protein_coding-intron (ENSMUST00000027174.9, intron 1 of 12)	182	ENSMUST00000189327.6	ENSMUSG00000026020	ENSMUST00000185368			Nop58			protein_coding
e11ve16_common_761	chr1	59762670	59764237	+	0.21374	NA	promoter-TSS (ENSMUST00000087435.6)	protein_coding-promoter-TSS (ENSMUST00000087435.6)	53	ENSMUST00000087435.6	ENSMUSG00000067336	ENSMUST00000087435			Bmpr2			protein_coding
e11ve16_common_762	chr1	59764477	59764735	+	0.68186	NA	exon (ENSMUST00000087435.6, exon 1 of 13)	protein_coding-exon (ENSMUST00000087435.6, exon 1 of 13)	1206	ENSMUST00000087435.6	ENSMUSG00000067336	ENSMUST00000087435			Bmpr2			protein_coding
e11ve16_common_763	chr1	59883386	59883878	+	0.7183	NA	Intergenic	Intergenic	4057	ENSMUST00000193096.1	ENSMUSG00000103131	ENSMUST00000193096			Gm37977			TEC
e11ve16_common_764	chr1	59912566	59914014	+	0.27456	NA	exon (ENSMUST00000036540.11, exon 1 of 8)	protein_coding-exon (ENSMUST00000036540.11, exon 1 of 8)	284	ENSMUST00000036540.11	ENSMUSG00000041040	ENSMUST00000036540			Fam117b			protein_coding
e11ve16_common_765	chr1	60042741	60043460	+	1.45442	NA	promoter-TSS (ENSMUST00000027172.12)	protein_coding-promoter-TSS (ENSMUST00000027172.12)	-13	ENSMUST00000027172.12	ENSMUSG00000026018	ENSMUST00000027172			Ica1l			protein_coding
e11ve16_common_766	chr1	60097419	60098744	+	0.45517	NA	promoter-TSS (ENSMUST00000027173.14)	protein_coding-promoter-TSS (ENSMUST00000027173.14)	44	ENSMUST00000143342.7	ENSMUSG00000026019	ENSMUST00000136461			Wdr12			protein_coding
e11ve16_common_767	chr1	60179871	60181201	+	0.57394	NA	promoter-TSS (ENSMUST00000160834.7)	protein_coding-promoter-TSS (ENSMUST00000160834.7)	-63	ENSMUST00000160834.7	ENSMUSG00000073664	ENSMUST00000188450			Nbeal1			protein_coding
e11ve16_common_768	chr1	60342831	60343986	+	0.28505	NA	promoter-TSS (ENSMUST00000060608.12)	protein_coding-promoter-TSS (ENSMUST00000060608.12)	85	ENSMUST00000114202.7	ENSMUSG00000049439	ENSMUST00000114202			Cyp20a1			protein_coding
e11ve16_common_769	chr1	60409397	60410459	+	0.3794	NA	intron (ENSMUST00000189082.6, intron 1 of 4)	protein_coding-intron (ENSMUST00000052332.14, intron 1 of 8)	120	ENSMUST00000189649.1	ENSMUSG00000026782	ENSMUST00000187400			Abi2			protein_coding
e11ve16_common_770	chr1	60565453	60566711	+	0.67048	NA	intron (ENSMUST00000142258.2, intron 1 of 3)	protein_coding-intron (ENSMUST00000027168.11, intron 1 of 15)	683	ENSMUST00000027168.11	ENSMUSG00000026014	ENSMUST00000182085			Raph1			protein_coding
e11ve16_common_771	chr1	60596114	60597082	+	0.36935	NA	promoter-TSS (ENSMUST00000195569.1)	TEC-promoter-TSS (ENSMUST00000195569.1)	-362	ENSMUST00000195569.1	ENSMUSG00000103215	ENSMUST00000195569			Gm38388			TEC
e11ve16_common_772	chr1	60609101	60609509	+	1.03963	NA	Intergenic	Intergenic	4498	ENSMUST00000158348.1	ENSMUSG00000088973	ENSMUST00000158348			Gm23762			miRNA
e11ve16_common_773	chr1	60609701	60609940	+	1.17395	NA	Intergenic	Intergenic	3983	ENSMUST00000158348.1	ENSMUSG00000088973	ENSMUST00000158348			Gm23762			miRNA
e11ve16_common_774	chr1	61180994	61181865	+	0.35909	NA	Intergenic	Intergenic	15813	ENSMUST00000120063.1	ENSMUSG00000080785	ENSMUST00000120063			Gm11591			processed_pseudogene
e11ve16_common_775	chr1	61638454	61639779	+	1.46438	NA	promoter-TSS (ENSMUST00000046673.10)	protein_coding-promoter-TSS (ENSMUST00000046673.10)	-127	ENSMUST00000046673.10	ENSMUSG00000052062	ENSMUST00000094906			Pard3b			protein_coding
e11ve16_common_776	chr1	61927770	61928193	+	0.6341	NA	intron (ENSMUST00000046673.10, intron 2 of 21)	protein_coding-intron (ENSMUST00000046673.10, intron 2 of 21)	53226	ENSMUST00000187972.1	ENSMUSG00000100344	ENSMUST00000187972			Gm29640			processed_pseudogene
e11ve16_common_777	chr1	62579748	62580841	+	0.62429	NA	intron (ENSMUST00000046673.10, intron 20 of 21)	protein_coding-intron (ENSMUST00000046673.10, intron 20 of 21)	-44352	ENSMUST00000185587.1	ENSMUSG00000100750	ENSMUST00000185587			Gm29084			lncRNA
e11ve16_common_778	chr1	62625579	62626767	+	0.20264	NA	intron (ENSMUST00000094906.3, intron 21 of 21)	protein_coding-intron (ENSMUST00000046673.10, intron 21 of 21)	31615	ENSMUST00000119592.1	ENSMUSG00000081950	ENSMUST00000119592			Gm11600			processed_pseudogene
e11ve16_common_779	chr1	62692407	62692613	+	0.63593	NA	Intergenic	Intergenic	-10775	ENSMUST00000075144.11	ENSMUSG00000025969	ENSMUST00000126344			Nrp2			protein_coding
e11ve16_common_780	chr1	62702951	62703626	+	0.16228	NA	promoter-TSS (ENSMUST00000027112.12)	protein_coding-promoter-TSS (ENSMUST00000027112.12)	3	ENSMUST00000102822.8	ENSMUSG00000025969	ENSMUST00000126344			Nrp2			protein_coding
e11ve16_common_781	chr1	62706401	62707264	+	0.27803	NA	intron (ENSMUST00000126344.1, intron 1 of 2)	protein_coding-intron (ENSMUST00000027112.12, intron 1 of 15)	3130	ENSMUST00000063594.12	ENSMUSG00000025969	ENSMUST00000126344			Nrp2			protein_coding
e11ve16_common_782	chr1	62794710	62796487	+	0.54148	NA	intron (ENSMUST00000075144.11, intron 15 of 15)	protein_coding-intron (ENSMUST00000027112.12, intron 15 of 15)	-13704	ENSMUST00000192219.1	ENSMUSG00000103032	ENSMUST00000192219			Gm37121			TEC
e11ve16_common_783	chr1	62813200	62813877	+	1.08448	NA	intron (ENSMUST00000114157.2, intron 16 of 16)	protein_coding-intron (ENSMUST00000063594.12, intron 16 of 16)	4236	ENSMUST00000192219.1	ENSMUSG00000103032	ENSMUST00000192219			Gm37121			TEC
e11ve16_common_784	chr1	62814047	62814365	+	2.10077	NA	intron (ENSMUST00000114157.2, intron 16 of 16)	protein_coding-intron (ENSMUST00000063594.12, intron 16 of 16)	4904	ENSMUST00000192219.1	ENSMUSG00000103032	ENSMUST00000192219			Gm37121			TEC
e11ve16_common_785	chr1	62843394	62843742	+	0.07714	NA	Intergenic	Intergenic	-11198	ENSMUST00000189802.1	ENSMUSG00000100426	ENSMUST00000189802			Gm4208			lncRNA
e11ve16_common_786	chr1	62942191	62942774	+	0.80059	NA	Intergenic	Intergenic	-83260	ENSMUST00000199516.1	ENSMUSG00000104991	ENSMUST00000199516			Gm44468			miRNA
e11ve16_common_787	chr1	62964231	62964701	+	0.10417	NA	intron (ENSMUST00000133236.7, intron 11 of 12)	protein_coding-intron (ENSMUST00000133236.7, intron 11 of 12)	-61276	ENSMUST00000199516.1	ENSMUSG00000104991	ENSMUST00000199516			Gm44468			miRNA
e11ve16_common_788	chr1	62984684	62984908	+	0.02452	NA	intron (ENSMUST00000133236.7, intron 9 of 12)	protein_coding-intron (ENSMUST00000133236.7, intron 9 of 12)	-40946	ENSMUST00000199516.1	ENSMUSG00000104991	ENSMUST00000199516			Gm44468			miRNA
e11ve16_common_789	chr1	63004710	63005196	+	0.9373	NA	intron (ENSMUST00000133236.7, intron 9 of 12)	protein_coding-intron (ENSMUST00000133236.7, intron 9 of 12)	-20789	ENSMUST00000199516.1	ENSMUSG00000104991	ENSMUST00000199516			Gm44468			miRNA
e11ve16_common_790	chr1	63005395	63005756	+	2.28402	NA	intron (ENSMUST00000133236.7, intron 9 of 12)	protein_coding-intron (ENSMUST00000133236.7, intron 9 of 12)	-20167	ENSMUST00000199516.1	ENSMUSG00000104991	ENSMUST00000199516			Gm44468			miRNA
e11ve16_common_791	chr1	63113026	63115088	+	0.55765	NA	promoter-TSS (ENSMUST00000138611.7)	lncRNA-promoter-TSS (ENSMUST00000138611.7)	-39	ENSMUST00000186786.1	ENSMUSG00000084799	ENSMUST00000138611			Ino80dos			lncRNA
e11ve16_common_792	chr1	63129550	63130456	+	0.48834	NA	intron (ENSMUST00000188602.1, intron 1 of 3)	lncRNA-intron (ENSMUST00000138611.7, intron 1 of 3)	12885	ENSMUST00000185480.1	ENSMUSG00000101599	ENSMUST00000185480			Gm20342			lncRNA
e11ve16_common_793	chr1	63176306	63177371	+	0.62763	NA	promoter-TSS (ENSMUST00000027108.12)	protein_coding-promoter-TSS (ENSMUST00000027108.12)	-5	ENSMUST00000189664.1	ENSMUSG00000025968	ENSMUST00000185412			Ndufs1			protein_coding
e11ve16_common_794	chr1	63214034	63214246	+	0.26087	NA	promoter-TSS (ENSMUST00000187533.1)	protein_coding-promoter-TSS (ENSMUST00000187533.1)	83	ENSMUST00000187533.1	ENSMUSG00000046856	ENSMUST00000050536			Gpr1			protein_coding
e11ve16_common_795	chr1	63247929	63248405	+	1.56201	NA	exon (ENSMUST00000194370.1, exon 1 of 1)	TEC-exon (ENSMUST00000194370.1, exon 1 of 1)	332	ENSMUST00000194370.1	ENSMUSG00000102536	ENSMUST00000194370			1700039I01Rik			TEC
e11ve16_common_796	chr1	63272819	63274297	+	0.26499	NA	promoter-TSS (ENSMUST00000151616.1)	lncRNA-promoter-TSS (ENSMUST00000151616.1)	-195	ENSMUST00000174964.1	ENSMUSG00000092705	ENSMUST00000174964			Gm24513			miRNA
e11ve16_common_797	chr1	63445892	63446369	+	1.5377	NA	promoter-TSS (ENSMUST00000114103.7)	protein_coding-promoter-TSS (ENSMUST00000114103.7)	-81	ENSMUST00000114103.7	ENSMUSG00000025964	ENSMUST00000114101			Adam23			protein_coding
e11ve16_common_798	chr1	63614542	63614785	+	0.08797	NA	Intergenic	Intergenic	-1305	ENSMUST00000226288.1	ENSMUSG00000115378	ENSMUST00000226288			Gm39653			protein_coding
e11ve16_common_799	chr1	63730126	63731159	+	0.86937	NA	promoter-TSS (ENSMUST00000027103.6)	protein_coding-promoter-TSS (ENSMUST00000027103.6)	1	ENSMUST00000148758.7	ENSMUSG00000025962	ENSMUST00000123945			Fastkd2			protein_coding
e11ve16_common_800	chr1	63857668	63858466	+	0.47687	NA	Intergenic	Intergenic	-12489	ENSMUST00000120280.1	ENSMUSG00000080817	ENSMUST00000120280			Gm13751			processed_pseudogene
e11ve16_common_801	chr1	63953423	63953757	+	0.12195	NA	Intergenic	Intergenic	-11137	ENSMUST00000133244.1	ENSMUSG00000044689	ENSMUST00000133244			Gm13749			lncRNA
e11ve16_common_802	chr1	64018946	64019516	+	0.14843	NA	Intergenic	Intergenic	23270	ENSMUST00000184798.1	ENSMUSG00000098487	ENSMUST00000184798			Mir6899			miRNA
e11ve16_common_803	chr1	64020840	64021101	+	0.6034	NA	Intergenic	Intergenic	21531	ENSMUST00000184798.1	ENSMUSG00000098487	ENSMUST00000184798			Mir6899			miRNA
e11ve16_common_804	chr1	64038283	64038724	+	0.37813	NA	intron (ENSMUST00000114086.7, intron 3 of 3)	protein_coding-intron (ENSMUST00000114086.7, intron 3 of 3)	3998	ENSMUST00000184798.1	ENSMUSG00000098487	ENSMUST00000184798			Mir6899			miRNA
e11ve16_common_805	chr1	64105901	64106452	+	2.54148	NA	intron (ENSMUST00000114086.7, intron 1 of 3)	protein_coding-intron (ENSMUST00000055001.9, intron 2 of 3)	15306	ENSMUST00000055001.9	ENSMUSG00000025959	ENSMUST00000114086			Klf7			protein_coding
e11ve16_common_806	chr1	64106560	64106959	+	1.68713	NA	intron (ENSMUST00000114086.7, intron 1 of 3)	protein_coding-intron (ENSMUST00000055001.9, intron 2 of 3)	14723	ENSMUST00000055001.9	ENSMUSG00000025959	ENSMUST00000114086			Klf7			protein_coding
e11ve16_common_807	chr1	64120847	64121615	+	0.65559	NA	exon (ENSMUST00000114086.7, exon 1 of 4)	protein_coding-exon (ENSMUST00000114086.7, exon 1 of 4)	251	ENSMUST00000055001.9	ENSMUSG00000025959	ENSMUST00000114086			Klf7			protein_coding
e11ve16_common_808	chr1	64226008	64226746	+	0.31801	NA	intron (ENSMUST00000190863.1, intron 1 of 1)	lncRNA-intron (ENSMUST00000190863.1, intron 1 of 1)	76176	ENSMUST00000117621.1	ENSMUSG00000086721	ENSMUST00000117621			Gm13750			processed_pseudogene
e11ve16_common_809	chr1	64532001	64532231	+	0.98524	NA	promoter-TSS (ENSMUST00000049932.11)	protein_coding-promoter-TSS (ENSMUST00000049932.11)	-529	ENSMUST00000185594.6	ENSMUSG00000025958	ENSMUST00000171164			Creb1			protein_coding
e11ve16_common_810	chr1	64532878	64533241	+	0.88485	NA	intron (ENSMUST00000171164.7, intron 1 of 6)	protein_coding-intron (ENSMUST00000049932.11, intron 1 of 8)	165	ENSMUST00000190348.1	ENSMUSG00000025958	ENSMUST00000171164			Creb1			protein_coding
e11ve16_common_811	chr1	64616729	64618070	+	0.73255	NA	promoter-TSS (ENSMUST00000053469.1)	protein_coding-promoter-TSS (ENSMUST00000053469.1)	-157	ENSMUST00000114079.8	ENSMUSG00000025956	ENSMUST00000114079			Mettl21a			protein_coding
e11ve16_common_812	chr1	64690103	64690876	+	0.63495	NA	promoter-TSS (ENSMUST00000094898.4)	protein_coding-promoter-TSS (ENSMUST00000094898.4)	34	ENSMUST00000114077.7	ENSMUSG00000070871	ENSMUST00000187638			Ccnyl1			protein_coding
e11ve16_common_813	chr1	64691359	64691728	+	0.94385	NA	promoter-TSS (ENSMUST00000122813.1)	lncRNA-promoter-TSS (ENSMUST00000122813.1)	198	ENSMUST00000094898.4	ENSMUSG00000070871	ENSMUST00000187638			Ccnyl1			protein_coding
e11ve16_common_814	chr1	64736534	64737479	+	0.59712	NA	exon (ENSMUST00000194323.1, exon 1 of 1)	TEC-exon (ENSMUST00000194323.1, exon 1 of 1)	743	ENSMUST00000116133.3	ENSMUSG00000045005	ENSMUST00000116133			Fzd5			protein_coding
e11ve16_common_815	chr1	64737896	64738807	+	0.58705	NA	promoter-TSS (ENSMUST00000063982.6)	protein_coding-promoter-TSS (ENSMUST00000063982.6)	-600	ENSMUST00000063982.6	ENSMUSG00000045005	ENSMUST00000116133			Fzd5			protein_coding
e11ve16_common_816	chr1	64756541	64757702	+	0.38037	NA	Intergenic	Intergenic	-19370	ENSMUST00000063982.6	ENSMUSG00000045005	ENSMUST00000116133			Fzd5			protein_coding
e11ve16_common_817	chr1	64772916	64774061	+	0.13266	NA	Intergenic	Intergenic	-35737	ENSMUST00000063982.6	ENSMUSG00000045005	ENSMUST00000116133			Fzd5			protein_coding
e11ve16_common_818	chr1	64787890	64788301	+	0.75207	NA	intron (ENSMUST00000139649.7, intron 8 of 8)	protein_coding-intron (ENSMUST00000139649.7, intron 8 of 8)	48669	ENSMUST00000187188.1	ENSMUSG00000051344	ENSMUST00000097713			Plekhm3			protein_coding
e11ve16_common_819	chr1	64808756	64809269	+	0.25763	NA	intron (ENSMUST00000187188.1, intron 2 of 2)	protein_coding-intron (ENSMUST00000097713.1, intron 7 of 7)	27752	ENSMUST00000187188.1	ENSMUSG00000051344	ENSMUST00000097713			Plekhm3			protein_coding
e11ve16_common_820	chr1	64809457	64809923	+	0.25287	NA	intron (ENSMUST00000187188.1, intron 2 of 2)	protein_coding-intron (ENSMUST00000097713.1, intron 7 of 7)	27074	ENSMUST00000187188.1	ENSMUSG00000051344	ENSMUST00000097713			Plekhm3			protein_coding
e11ve16_common_821	chr1	64859704	64860530	+	1.04497	NA	TTS (ENSMUST00000140857.1)	protein_coding-TTS (ENSMUST00000140857.1)	-23353	ENSMUST00000187188.1	ENSMUSG00000051344	ENSMUST00000097713			Plekhm3			protein_coding
e11ve16_common_822	chr1	64918415	64919103	+	0.3069	NA	intron (ENSMUST00000140857.1, intron 2 of 4)	protein_coding-intron (ENSMUST00000097713.1, intron 3 of 7)	9338	ENSMUST00000140857.1	ENSMUSG00000051344	ENSMUST00000097713			Plekhm3			protein_coding
e11ve16_common_823	chr1	64949149	64950039	+	0.15768	NA	intron (ENSMUST00000097713.1, intron 1 of 7)	protein_coding-intron (ENSMUST00000097713.1, intron 1 of 7)	7133	ENSMUST00000134097.1	ENSMUSG00000051344	ENSMUST00000097713			Plekhm3			protein_coding
e11ve16_common_824	chr1	64956162	64957196	+	1.10376	NA	promoter-TSS (ENSMUST00000123225.1)	protein_coding-promoter-TSS (ENSMUST00000123225.1)	48	ENSMUST00000134097.1	ENSMUSG00000051344	ENSMUST00000097713			Plekhm3			protein_coding
e11ve16_common_825	chr1	65010076	65010318	+	0.29629	NA	Intergenic	Intergenic	6346	ENSMUST00000159896.1	ENSMUSG00000025955	ENSMUST00000160283			Akr1cl			protein_coding
e11ve16_common_826	chr1	65112167	65113191	+	0.36618	NA	intron (ENSMUST00000148020.7, intron 5 of 7)	protein_coding-intron (ENSMUST00000050047.3, intron 5 of 7)	6879	ENSMUST00000144760.2	ENSMUSG00000100846	ENSMUST00000144760			Gm28845			protein_coding
e11ve16_common_827	chr1	65178145	65178551	+	1.92442	NA	intron (ENSMUST00000188109.6, intron 1 of 4)	protein_coding-intron (ENSMUST00000097709.10, intron 1 of 8)	833	ENSMUST00000097709.10	ENSMUSG00000025950	ENSMUST00000097709			Idh1			protein_coding
e11ve16_common_828	chr1	65178926	65180035	+	0.54077	NA	promoter-TSS (ENSMUST00000097709.10)	protein_coding-promoter-TSS (ENSMUST00000097709.10)	-299	ENSMUST00000097709.10	ENSMUSG00000025950	ENSMUST00000097709			Idh1			protein_coding
e11ve16_common_829	chr1	65186053	65186632	+	0.68318	NA	promoter-TSS (ENSMUST00000081154.13)	protein_coding-promoter-TSS (ENSMUST00000081154.13)	96	ENSMUST00000188109.6	ENSMUSG00000025950	ENSMUST00000097709			Idh1			protein_coding
e11ve16_common_830	chr1	65186789	65187303	+	0.92559	NA	promoter-TSS (ENSMUST00000169032.7)	protein_coding-promoter-TSS (ENSMUST00000169032.7)	296	ENSMUST00000097707.4	ENSMUSG00000025949	ENSMUST00000188799			Pikfyve			protein_coding
e11ve16_common_831	chr1	65282763	65283361	+	0.10837	NA	intron (ENSMUST00000140190.7, intron 1 of 5)	protein_coding-intron (ENSMUST00000140190.7, intron 1 of 5)	1006	ENSMUST00000140190.7	ENSMUSG00000025946	ENSMUST00000027083			Pth2r			protein_coding
e11ve16_common_832	chr1	65311278	65312772	+	1.58996	NA	intron (ENSMUST00000027083.6, intron 1 of 12)	protein_coding-intron (ENSMUST00000027083.6, intron 1 of 12)	768	ENSMUST00000027083.6	ENSMUSG00000025946	ENSMUST00000027083			Pth2r			protein_coding
e11ve16_common_833	chr1	65440114	65440638	+	1.54189	NA	Intergenic	Intergenic	-1391	ENSMUST00000187755.1	ENSMUSG00000100340	ENSMUST00000187755			Gm28923			processed_pseudogene
e11ve16_common_834	chr1	65535841	65536262	+	1.77008	NA	Intergenic	Intergenic	-11976	ENSMUST00000189087.1	ENSMUSG00000099819	ENSMUST00000189087			Gm28728			processed_pseudogene
e11ve16_common_835	chr1	66003996	66004259	+	0.20734	NA	Intergenic	Intergenic	28798	ENSMUST00000119367.1	ENSMUSG00000081623	ENSMUST00000119367			Gm8809			processed_pseudogene
e11ve16_common_836	chr1	66174740	66175175	+	0.78089	NA	promoter-TSS (ENSMUST00000114015.7)	protein_coding-promoter-TSS (ENSMUST00000114015.7)	-316	ENSMUST00000156636.8	ENSMUSG00000015222	ENSMUST00000174590			Map2			protein_coding
e11ve16_common_837	chr1	66175529	66176033	+	0.41358	NA	intron (ENSMUST00000124873.7, intron 1 of 3)	protein_coding-intron (ENSMUST00000114015.7, intron 1 of 13)	231	ENSMUST00000125844.1	ENSMUSG00000015222	ENSMUST00000174590			Map2			protein_coding
e11ve16_common_838	chr1	66186896	66187307	+	0.54286	NA	intron (ENSMUST00000124873.7, intron 1 of 3)	protein_coding-intron (ENSMUST00000114015.7, intron 1 of 13)	11551	ENSMUST00000125844.1	ENSMUSG00000015222	ENSMUST00000174590			Map2			protein_coding
e11ve16_common_839	chr1	66251843	66252470	+	0.11263	NA	intron (ENSMUST00000024639.11, intron 1 of 11)	protein_coding-intron (ENSMUST00000024639.11, intron 1 of 11)	494	ENSMUST00000024639.11	ENSMUSG00000015222	ENSMUST00000174590			Map2			protein_coding
e11ve16_common_840	chr1	66467864	66468649	+	0.23755	NA	promoter-TSS (ENSMUST00000061620.16)	protein_coding-promoter-TSS (ENSMUST00000061620.16)	-111	ENSMUST00000061620.16	ENSMUSG00000055567	ENSMUST00000212557			Unc80			protein_coding
e11ve16_common_841	chr1	66648232	66648572	+	0.37794	NA	exon (ENSMUST00000061620.16, exon 45 of 65)	protein_coding-exon (ENSMUST00000061620.16, exon 45 of 65)	-25328	ENSMUST00000187179.1	ENSMUSG00000055567	ENSMUST00000212557			Unc80			protein_coding
e11ve16_common_842	chr1	66654906	66655972	+	0.19844	NA	intron (ENSMUST00000212557.2, intron 50 of 63)	protein_coding-intron (ENSMUST00000061620.16, intron 51 of 64)	-18291	ENSMUST00000187179.1	ENSMUSG00000055567	ENSMUST00000212557			Unc80			protein_coding
e11ve16_common_843	chr1	66674647	66675017	+	0.5876	NA	TTS (ENSMUST00000187179.1)	protein_coding-TTS (ENSMUST00000187179.1)	1102	ENSMUST00000187179.1	ENSMUSG00000055567	ENSMUST00000212557			Unc80			protein_coding
e11ve16_common_844	chr1	66686413	66686621	+	0.23311	NA	intron (ENSMUST00000212557.2, intron 60 of 63)	protein_coding-intron (ENSMUST00000061620.16, intron 61 of 64)	5839	ENSMUST00000192513.1	ENSMUSG00000103375	ENSMUST00000192513			Gm37181			TEC
e11ve16_common_845	chr1	66701163	66701692	+	0.82038	NA	intron (ENSMUST00000151016.1, intron 1 of 3)	protein_coding-intron (ENSMUST00000027157.9, intron 1 of 5)	520	ENSMUST00000190404.1	ENSMUSG00000026005	ENSMUST00000027157			Rpe			protein_coding
e11ve16_common_846	chr1	66816193	66818147	+	0.80829	NA	intron (ENSMUST00000113987.1, intron 1 of 7)	protein_coding-intron (ENSMUST00000068168.9, intron 1 of 13)	376	ENSMUST00000068168.9	ENSMUSG00000026004	ENSMUST00000129190			Kansl1l			protein_coding
e11ve16_common_847	chr1	66838524	66838950	+	0.25831	NA	intron (ENSMUST00000027153.5, intron 8 of 10)	protein_coding-intron (ENSMUST00000027153.5, intron 8 of 10)	10865	ENSMUST00000121857.1	ENSMUSG00000082769	ENSMUST00000121857			Gm15793			processed_pseudogene
e11ve16_common_848	chr1	66862317	66862876	+	1.44377	NA	intron (ENSMUST00000027153.5, intron 1 of 10)	protein_coding-intron (ENSMUST00000027153.5, intron 1 of 10)	681	ENSMUST00000027153.5	ENSMUSG00000026003	ENSMUST00000139208			Acadl			protein_coding
e11ve16_common_849	chr1	66863371	66863949	+	1.45257	NA	promoter-TSS (ENSMUST00000027153.5)	protein_coding-promoter-TSS (ENSMUST00000027153.5)	-383	ENSMUST00000027153.5	ENSMUSG00000026003	ENSMUST00000139208			Acadl			protein_coding
e11ve16_common_850	chr1	66895557	66895783	+	1.16479	NA	Intergenic	Intergenic	28873	ENSMUST00000104140.1	ENSMUSG00000077328	ENSMUST00000104140			Gm25832			snoRNA
e11ve16_common_851	chr1	66896326	66896563	+	1.47582	NA	Intergenic	Intergenic	29647	ENSMUST00000104140.1	ENSMUSG00000077328	ENSMUST00000104140			Gm25832			snoRNA
e11ve16_common_852	chr1	66940657	66941131	+	0.02967	NA	intron (ENSMUST00000027151.11, intron 1 of 6)	protein_coding-intron (ENSMUST00000027151.11, intron 1 of 6)	4249	ENSMUST00000027151.11	ENSMUSG00000061816	ENSMUST00000120415			Myl1			protein_coding
e11ve16_common_853	chr1	66960650	66961197	+	0.39019	NA	Intergenic	Intergenic	9094	ENSMUST00000121328.1	ENSMUSG00000082212	ENSMUST00000121328			Gm15826			processed_pseudogene
e11ve16_common_854	chr1	66996677	66996923	+	2.21751	NA	Intergenic	Intergenic	24265	ENSMUST00000133508.1	ENSMUSG00000026000	ENSMUST00000027149			Lancl1			protein_coding
e11ve16_common_855	chr1	66997114	66997516	+	0.33264	NA	Intergenic	Intergenic	23750	ENSMUST00000133508.1	ENSMUSG00000026000	ENSMUST00000027149			Lancl1			protein_coding
e11ve16_common_856	chr1	67032082	67032918	+	0.09012	NA	intron (ENSMUST00000119559.7, intron 3 of 9)	protein_coding-intron (ENSMUST00000027149.11, intron 3 of 9)	6334	ENSMUST00000149996.1	ENSMUSG00000026000	ENSMUST00000027149			Lancl1			protein_coding
e11ve16_common_857	chr1	67038283	67039334	+	0.17354	NA	promoter-TSS (ENSMUST00000027149.11)	protein_coding-promoter-TSS (ENSMUST00000027149.11)	26	ENSMUST00000149996.1	ENSMUSG00000026000	ENSMUST00000027149			Lancl1			protein_coding
e11ve16_common_858	chr1	67061350	67062241	+	0.4156	NA	Intergenic	Intergenic	-22923	ENSMUST00000113979.9	ENSMUSG00000026000	ENSMUST00000027149			Lancl1			protein_coding
e11ve16_common_859	chr1	67212859	67213235	+	0.41687	NA	intron (ENSMUST00000027144.7, intron 30 of 37)	protein_coding-intron (ENSMUST00000027144.7, intron 30 of 37)	-36153	ENSMUST00000140506.1	ENSMUSG00000086204	ENSMUST00000140506			Gm15668			lncRNA
e11ve16_common_860	chr1	67640349	67640988	+	0.51896	NA	Intergenic	Intergenic	23693	ENSMUST00000174899.2	ENSMUSG00000095282	ENSMUST00000174899			Gm22548			miRNA
e11ve16_common_861	chr1	68049768	68050642	+	0.30645	NA	intron (ENSMUST00000119142.7, intron 25 of 27)	protein_coding-intron (ENSMUST00000119142.7, intron 25 of 27)	25962	ENSMUST00000124160.3	ENSMUSG00000087329	ENSMUST00000124160			Gm15671			lncRNA
e11ve16_common_862	chr1	68142239	68142444	+	0.02669	NA	intron (ENSMUST00000119142.7, intron 20 of 27)	protein_coding-intron (ENSMUST00000119142.7, intron 20 of 27)	-25794	ENSMUST00000193344.1	ENSMUSG00000102449	ENSMUST00000193344			Gm37100			TEC
e11ve16_common_863	chr1	68780004	68781288	+	0.46784	NA	intron (ENSMUST00000153432.1, intron 1 of 18)	protein_coding-intron (ENSMUST00000119142.7, intron 1 of 27)	-18919	ENSMUST00000195066.1	ENSMUSG00000103809	ENSMUST00000195066			Gm37061			TEC
e11ve16_common_864	chr1	68957336	68957646	+	1.50459	NA	intron (ENSMUST00000153432.1, intron 1 of 18)	protein_coding-intron (ENSMUST00000119142.7, intron 1 of 27)	149249	ENSMUST00000140116.1	ENSMUSG00000087514	ENSMUST00000140116			Gm16076			lncRNA
e11ve16_common_865	chr1	69105661	69108772	+	0.52179	NA	promoter-TSS (ENSMUST00000140116.1)	lncRNA-promoter-TSS (ENSMUST00000140116.1)	-476	ENSMUST00000140116.1	ENSMUSG00000087514	ENSMUST00000140116			Gm16076			lncRNA
e11ve16_common_866	chr1	69165146	69165376	+	0.25234	NA	Intergenic	Intergenic	-33962	ENSMUST00000122454.1	ENSMUSG00000084332	ENSMUST00000122454			Gm8840			processed_pseudogene
e11ve16_common_867	chr1	69241942	69242163	+	0.1546	NA	Intergenic	Intergenic	-110753	ENSMUST00000122454.1	ENSMUSG00000084332	ENSMUST00000122454			Gm8840			processed_pseudogene
e11ve16_common_868	chr1	69331587	69331791	+	0.84789	NA	Intergenic	Intergenic	-45632	ENSMUST00000187740.1	ENSMUSG00000101387	ENSMUST00000187740			Pced1c-ps			processed_pseudogene
e11ve16_common_869	chr1	69433542	69433795	+	0.90076	NA	Intergenic	Intergenic	-7388	ENSMUST00000189646.1	ENSMUSG00000099804	ENSMUST00000189646			Gm28497			lncRNA
e11ve16_common_870	chr1	69434026	69434548	+	0.93874	NA	Intergenic	Intergenic	-6769	ENSMUST00000189646.1	ENSMUSG00000099804	ENSMUST00000189646			Gm28497			lncRNA
e11ve16_common_871	chr1	69449932	69450160	+	0.07296	NA	Intergenic	Intergenic	8990	ENSMUST00000189646.1	ENSMUSG00000099804	ENSMUST00000189646			Gm28497			lncRNA
e11ve16_common_872	chr1	69470523	69471282	+	1.46745	NA	Intergenic	Intergenic	22886	ENSMUST00000185991.1	ENSMUSG00000100354	ENSMUST00000185991			Gm29113			lncRNA
e11ve16_common_873	chr1	69513252	69513805	+	0.44045	NA	promoter-TSS (ENSMUST00000187100.1)	lncRNA-promoter-TSS (ENSMUST00000187100.1)	-404	ENSMUST00000187100.1	ENSMUSG00000101156	ENSMUST00000187100			Gm29114			lncRNA
e11ve16_common_874	chr1	69610533	69611594	+	0.67195	NA	intron (ENSMUST00000027146.8, intron 3 of 7)	protein_coding-intron (ENSMUST00000027146.8, intron 3 of 7)	-12541	ENSMUST00000188962.1	ENSMUSG00000100815	ENSMUST00000188962			Gm29112			lncRNA
e11ve16_common_875	chr1	69656866	69657476	+	0.69511	NA	intron (ENSMUST00000027146.8, intron 3 of 7)	protein_coding-intron (ENSMUST00000027146.8, intron 3 of 7)	4890	ENSMUST00000190898.1	ENSMUSG00000099954	ENSMUST00000190898			Gm28112			lncRNA
e11ve16_common_876	chr1	69686267	69687987	+	1.14526	NA	promoter-TSS (ENSMUST00000188919.1)	protein_coding-promoter-TSS (ENSMUST00000188919.1)	13	ENSMUST00000188919.1	ENSMUSG00000025997	ENSMUST00000190771			Ikzf2			protein_coding
e11ve16_common_877	chr1	69688899	69689157	+	0.5315	NA	Intergenic	Intergenic	-1783	ENSMUST00000187184.6	ENSMUSG00000025997	ENSMUST00000190771			Ikzf2			protein_coding
e11ve16_common_878	chr1	69727880	69729544	+	0.5808	NA	Intergenic	Intergenic	-41467	ENSMUST00000187184.6	ENSMUSG00000025997	ENSMUST00000190771			Ikzf2			protein_coding
e11ve16_common_879	chr1	69790474	69790817	+	0.02288	NA	Intergenic	Intergenic	19777	ENSMUST00000194308.1	ENSMUSG00000103402	ENSMUST00000194308			Gm37930			TEC
e11ve16_common_880	chr1	69826567	69827449	+	0.24201	NA	promoter-TSS (ENSMUST00000065425.11)	protein_coding-promoter-TSS (ENSMUST00000065425.11)	16	ENSMUST00000113940.3	ENSMUSG00000053153	ENSMUST00000113940			Spag16			protein_coding
e11ve16_common_881	chr1	71102154	71102519	+	0.23882	NA	intron (ENSMUST00000027393.7, intron 1 of 10)	protein_coding-intron (ENSMUST00000027393.7, intron 1 of 10)	810	ENSMUST00000027393.7	ENSMUSG00000026196	ENSMUST00000027393			Bard1			protein_coding
e11ve16_common_882	chr1	71103263	71103699	+	1.89546	NA	promoter-TSS (ENSMUST00000027393.7)	protein_coding-promoter-TSS (ENSMUST00000027393.7)	-335	ENSMUST00000027393.7	ENSMUSG00000026196	ENSMUST00000027393			Bard1			protein_coding
e11ve16_common_883	chr1	71432451	71432782	+	1.21366	NA	Intergenic	Intergenic	-17706	ENSMUST00000187097.6	ENSMUSG00000050296	ENSMUST00000191520			Abca12			protein_coding
e11ve16_common_884	chr1	71556790	71557200	+	0.84904	NA	promoter-TSS (ENSMUST00000027384.5)	protein_coding-promoter-TSS (ENSMUST00000027384.5)	-155	ENSMUST00000027384.5	ENSMUSG00000026192	ENSMUST00000155769			Atic			protein_coding
e11ve16_common_885	chr1	71557388	71557803	+	0.42309	NA	exon (ENSMUST00000027384.5, exon 2 of 16)	protein_coding-exon (ENSMUST00000027384.5, exon 2 of 16)	382	ENSMUST00000136443.1	ENSMUSG00000026192	ENSMUST00000155769			Atic			protein_coding
e11ve16_common_886	chr1	71652604	71653889	+	1.64318	NA	promoter-TSS (ENSMUST00000055226.12)	protein_coding-promoter-TSS (ENSMUST00000055226.12)	-46	ENSMUST00000186129.6	ENSMUSG00000026193	ENSMUST00000186940			Fn1			protein_coding
e11ve16_common_887	chr1	71800345	71800777	+	0.13542	NA	Intergenic	Intergenic	46049	ENSMUST00000194017.1	ENSMUSG00000102689	ENSMUST00000194017			Gm37217			TEC
e11ve16_common_888	chr1	71837504	71837921	+	0.25868	NA	Intergenic	Intergenic	8898	ENSMUST00000194017.1	ENSMUSG00000102689	ENSMUST00000194017			Gm37217			TEC
e11ve16_common_889	chr1	71893275	71894239	+	0.79885	NA	TTS (ENSMUST00000187553.1)	lncRNA-TTS (ENSMUST00000187553.1)	5178	ENSMUST00000189983.1	ENSMUSG00000101211	ENSMUST00000187553			Gm28818			lncRNA
e11ve16_common_890	chr1	71938077	71938360	+	1.06042	NA	Intergenic	Intergenic	-21093	ENSMUST00000187553.1	ENSMUSG00000101211	ENSMUST00000187553			Gm28818			lncRNA
e11ve16_common_891	chr1	72123627	72123874	+	2.35067	NA	Intergenic	Intergenic	-1749	ENSMUST00000191139.1	ENSMUSG00000102123	ENSMUST00000191139			Gm4319			lncRNA
e11ve16_common_892	chr1	72165930	72166154	+	0.0129	NA	intron (ENSMUST00000048860.8, intron 2 of 4)	protein_coding-intron (ENSMUST00000048860.8, intron 2 of 4)	-44041	ENSMUST00000191139.1	ENSMUSG00000102123	ENSMUST00000191139			Gm4319			lncRNA
e11ve16_common_893	chr1	72182717	72183587	+	0.79553	NA	intron (ENSMUST00000048860.8, intron 2 of 4)	protein_coding-intron (ENSMUST00000048860.8, intron 2 of 4)	29155	ENSMUST00000048860.8	ENSMUSG00000039395	ENSMUST00000048860			Mreg			protein_coding
e11ve16_common_894	chr1	72211812	72212571	+	0.74477	NA	exon (ENSMUST00000048860.8, exon 1 of 5)	protein_coding-exon (ENSMUST00000048860.8, exon 1 of 5)	116	ENSMUST00000048860.8	ENSMUSG00000039395	ENSMUST00000048860			Mreg			protein_coding
e11ve16_common_895	chr1	72225664	72226935	+	0.48287	NA	promoter-TSS (ENSMUST00000178786.1)	snRNA-promoter-TSS (ENSMUST00000178786.1)	59	ENSMUST00000178786.1	ENSMUSG00000094655	ENSMUST00000178786			Gm25360			snRNA
e11ve16_common_896	chr1	72236358	72237299	+	1.20131	NA	promoter-TSS (ENSMUST00000101806.2)	snRNA-promoter-TSS (ENSMUST00000101806.2)	-118	ENSMUST00000101806.2	ENSMUSG00000094050	ENSMUST00000101806			Gm23472			snRNA
e11ve16_common_897	chr1	72243664	72244701	+	0.86948	NA	promoter-TSS (ENSMUST00000177868.1)	snRNA-promoter-TSS (ENSMUST00000177868.1)	-31	ENSMUST00000177868.1	ENSMUSG00000093956	ENSMUST00000177868			Gm24497			snRNA
e11ve16_common_898	chr1	72254398	72255362	+	0.50148	NA	promoter-TSS (ENSMUST00000179876.1)	snRNA-promoter-TSS (ENSMUST00000179876.1)	-128	ENSMUST00000179876.1	ENSMUSG00000093843	ENSMUST00000179876			Gm25939			snRNA
e11ve16_common_899	chr1	72255525	72255896	+	1.82809	NA	TTS (ENSMUST00000179876.1)	snRNA-TTS (ENSMUST00000179876.1)	702	ENSMUST00000179876.1	ENSMUSG00000093843	ENSMUST00000179876			Gm25939			snRNA
e11ve16_common_900	chr1	72283985	72284621	+	0.30976	NA	promoter-TSS (ENSMUST00000027380.11)	protein_coding-promoter-TSS (ENSMUST00000027380.11)	10	ENSMUST00000129458.1	ENSMUSG00000026189	ENSMUST00000027381			Pecr			protein_coding
e11ve16_common_901	chr1	72306779	72307913	+	0.08787	NA	promoter-TSS (ENSMUST00000027379.9)	protein_coding-promoter-TSS (ENSMUST00000027379.9)	-81	ENSMUST00000027379.9	ENSMUSG00000026187	ENSMUST00000027379			Xrcc5			protein_coding
e11ve16_common_902	chr1	72316388	72316672	+	2.49699	NA	intron (ENSMUST00000027379.9, intron 5 of 20)	protein_coding-intron (ENSMUST00000027379.9, intron 5 of 20)	9103	ENSMUST00000027379.9	ENSMUSG00000026187	ENSMUST00000027379			Xrcc5			protein_coding
e11ve16_common_903	chr1	72399963	72400240	+	0.60871	NA	Intergenic	Intergenic	-59398	ENSMUST00000146593.1	ENSMUSG00000085812	ENSMUST00000146593			Gm15843			processed_pseudogene
e11ve16_common_904	chr1	72536716	72537362	+	0.53709	NA	promoter-TSS (ENSMUST00000047786.5)	protein_coding-promoter-TSS (ENSMUST00000047786.5)	-109	ENSMUST00000047786.5	ENSMUSG00000039372	ENSMUST00000047786			2021-03-04			protein_coding
e11ve16_common_905	chr1	72582887	72583889	+	1.04867	NA	promoter-TSS (ENSMUST00000152225.1)	protein_coding-promoter-TSS (ENSMUST00000152225.1)	137	ENSMUST00000145868.7	ENSMUSG00000039354	ENSMUST00000152225			Smarcal1			protein_coding
e11ve16_common_906	chr1	72672812	72673501	+	0.62006	NA	intron (ENSMUST00000212573.1, intron 9 of 22)	protein_coding-intron (ENSMUST00000053499.5, intron 10 of 23)	-19708	ENSMUST00000211962.1	ENSMUSG00000110487	ENSMUST00000211962			Gm18035			processed_pseudogene
e11ve16_common_907	chr1	72710944	72711827	+	0.87786	NA	promoter-TSS (ENSMUST00000059980.10)	protein_coding-promoter-TSS (ENSMUST00000059980.10)	71	ENSMUST00000212432.1	ENSMUSG00000046330	ENSMUST00000212335			Rpl37a			protein_coding
e11ve16_common_908	chr1	72718750	72719075	+	0.05264	NA	Intergenic	Intergenic	7131	ENSMUST00000211963.1	ENSMUSG00000046330	ENSMUST00000212335			Rpl37a			protein_coding
e11ve16_common_909	chr1	72755878	72756283	+	0.30189	NA	Intergenic	Intergenic	44299	ENSMUST00000211963.1	ENSMUSG00000046330	ENSMUST00000212335			Rpl37a			protein_coding
e11ve16_common_910	chr1	72778872	72779196	+	0.56286	NA	Intergenic	Intergenic	-45469	ENSMUST00000047328.10	ENSMUSG00000039323	ENSMUST00000155703			Igfbp2			protein_coding
e11ve16_common_911	chr1	72805737	72806544	+	0.56896	NA	Intergenic	Intergenic	-18363	ENSMUST00000047328.10	ENSMUSG00000039323	ENSMUST00000155703			Igfbp2			protein_coding
e11ve16_common_912	chr1	72824452	72824872	+	1.8986	NA	promoter-TSS (ENSMUST00000120564.1)	protein_coding-promoter-TSS (ENSMUST00000120564.1)	159	ENSMUST00000047328.10	ENSMUSG00000039323	ENSMUST00000155703			Igfbp2			protein_coding
e11ve16_common_913	chr1	72870433	72871188	+	1.17784	NA	intron (ENSMUST00000027377.8, intron 1 of 3)	protein_coding-intron (ENSMUST00000027377.8, intron 1 of 3)	3465	ENSMUST00000137339.1	ENSMUSG00000026185	ENSMUST00000027377			Igfbp5			protein_coding
e11ve16_common_914	chr1	72873970	72874198	+	2.07692	NA	exon (ENSMUST00000027377.8, exon 1 of 4)	protein_coding-exon (ENSMUST00000027377.8, exon 1 of 4)	191	ENSMUST00000137339.1	ENSMUSG00000026185	ENSMUST00000027377			Igfbp5			protein_coding
e11ve16_common_915	chr1	72874338	72874562	+	2.45096	NA	promoter-TSS (ENSMUST00000137339.1)	protein_coding-promoter-TSS (ENSMUST00000137339.1)	-175	ENSMUST00000137339.1	ENSMUSG00000026185	ENSMUST00000027377			Igfbp5			protein_coding
e11ve16_common_916	chr1	72929580	72930348	+	1.00089	NA	Intergenic	Intergenic	-54880	ENSMUST00000188793.1	ENSMUSG00000101968	ENSMUST00000188349			1700027A15Rik			lncRNA
e11ve16_common_917	chr1	72944744	72945518	+	0.87665	NA	Intergenic	Intergenic	-39713	ENSMUST00000188793.1	ENSMUSG00000101968	ENSMUST00000188349			1700027A15Rik			lncRNA
e11ve16_common_918	chr1	72945889	72946169	+	0.52733	NA	Intergenic	Intergenic	-38815	ENSMUST00000188793.1	ENSMUSG00000101968	ENSMUST00000188349			1700027A15Rik			lncRNA
e11ve16_common_919	chr1	73027024	73027563	+	1.25751	NA	Intergenic	Intergenic	2724	ENSMUST00000190525.1	ENSMUSG00000101968	ENSMUST00000188349			1700027A15Rik			lncRNA
e11ve16_common_920	chr1	73251762	73252232	+	1.08583	NA	Intergenic	Intergenic	-17067	ENSMUST00000190578.1	ENSMUSG00000101112	ENSMUST00000190578			Gm29185			lncRNA
e11ve16_common_921	chr1	73307617	73307978	+	1.60972	NA	Intergenic	Intergenic	4253	ENSMUST00000190038.1	ENSMUSG00000100697	ENSMUST00000190038			Gm29184			processed_pseudogene
e11ve16_common_922	chr1	73362850	73363307	+	0.10771	NA	Intergenic	Intergenic	-29168	ENSMUST00000183977.1	ENSMUSG00000098697	ENSMUST00000183977			Gm27315			misc_RNA
e11ve16_common_923	chr1	73363510	73364150	+	0.35965	NA	Intergenic	Intergenic	-28416	ENSMUST00000183977.1	ENSMUSG00000098697	ENSMUST00000183977			Gm27315			misc_RNA
e11ve16_common_924	chr1	73479536	73480126	+	1.32389	NA	Intergenic	Intergenic	-32215	ENSMUST00000185703.1	ENSMUSG00000100044	ENSMUST00000185703			Gm9553			processed_pseudogene
e11ve16_common_925	chr1	73683191	73683786	+	1.95912	NA	intron (ENSMUST00000189514.1, intron 6 of 8)	lncRNA-intron (ENSMUST00000189514.1, intron 6 of 8)	60459	ENSMUST00000191114.6	ENSMUSG00000100301	ENSMUST00000189514			6030407O03Rik			lncRNA
e11ve16_common_926	chr1	73826135	73826561	+	1.56852	NA	intron (ENSMUST00000188600.1, intron 2 of 7)	lncRNA-intron (ENSMUST00000188600.1, intron 2 of 7)	15569	ENSMUST00000188600.1	ENSMUSG00000101344	ENSMUST00000188600			Gm29183			lncRNA
e11ve16_common_927	chr1	73862517	73862824	+	1.71089	NA	exon (ENSMUST00000189514.1, exon 2 of 9)	lncRNA-exon (ENSMUST00000189514.1, exon 2 of 9)	1796	ENSMUST00000189514.1	ENSMUSG00000100301	ENSMUST00000189514			6030407O03Rik			lncRNA
e11ve16_common_928	chr1	73863078	73863420	+	1.15729	NA	intron (ENSMUST00000189514.1, intron 1 of 8)	lncRNA-intron (ENSMUST00000189514.1, intron 1 of 8)	1217	ENSMUST00000189514.1	ENSMUSG00000100301	ENSMUST00000189514			6030407O03Rik			lncRNA
e11ve16_common_929	chr1	73914254	73914778	+	1.18519	NA	exon (ENSMUST00000187691.6, exon 12 of 12)	protein_coding-exon (ENSMUST00000187691.6, exon 12 of 12)	13701	ENSMUST00000191527.6	ENSMUSG00000055322	ENSMUST00000185264			Tns1			protein_coding
e11ve16_common_930	chr1	73932378	73933308	+	0.68204	NA	intron (ENSMUST00000187584.6, intron 22 of 32)	protein_coding-intron (ENSMUST00000169786.7, intron 24 of 34)	-2032	ENSMUST00000185264.6	ENSMUSG00000055322	ENSMUST00000185264			Tns1			protein_coding
e11ve16_common_931	chr1	73962782	73963639	+	1.00976	NA	promoter-TSS (ENSMUST00000191367.1)	protein_coding-promoter-TSS (ENSMUST00000191367.1)	-167	ENSMUST00000191367.1	ENSMUSG00000055322	ENSMUST00000185264			Tns1			protein_coding
e11ve16_common_932	chr1	74009208	74009484	+	0.99091	NA	intron (ENSMUST00000187584.6, intron 4 of 32)	protein_coding-intron (ENSMUST00000169786.7, intron 4 of 34)	7076	ENSMUST00000186381.6	ENSMUSG00000055322	ENSMUST00000185264			Tns1			protein_coding
e11ve16_common_933	chr1	74024685	74024967	+	0.56041	NA	intron (ENSMUST00000191204.6, intron 3 of 7)	protein_coding-intron (ENSMUST00000191204.6, intron 3 of 7)	-8404	ENSMUST00000186381.6	ENSMUSG00000055322	ENSMUST00000185264			Tns1			protein_coding
e11ve16_common_934	chr1	74036727	74037281	+	0.19195	NA	exon (ENSMUST00000187281.6, exon 1 of 7)	protein_coding-exon (ENSMUST00000187281.6, exon 1 of 7)	129	ENSMUST00000187281.6	ENSMUSG00000055322	ENSMUST00000185264			Tns1			protein_coding
e11ve16_common_935	chr1	74068045	74068326	+	2.39906	NA	intron (ENSMUST00000191204.6, intron 3 of 7)	protein_coding-intron (ENSMUST00000169786.7, intron 3 of 34)	23166	ENSMUST00000187584.6	ENSMUSG00000055322	ENSMUST00000185264			Tns1			protein_coding
e11ve16_common_936	chr1	74068544	74069703	+	0.51492	NA	intron (ENSMUST00000191204.6, intron 2 of 7)	protein_coding-intron (ENSMUST00000169786.7, intron 2 of 34)	22228	ENSMUST00000187584.6	ENSMUSG00000055322	ENSMUST00000185264			Tns1			protein_coding
e11ve16_common_937	chr1	74124224	74125367	+	0.27467	NA	promoter-TSS (ENSMUST00000080167.10)	protein_coding-promoter-TSS (ENSMUST00000080167.10)	-346	ENSMUST00000191104.6	ENSMUSG00000055322	ENSMUST00000185264			Tns1			protein_coding
e11ve16_common_938	chr1	74236103	74237215	+	0.98128	NA	exon (ENSMUST00000006467.13, exon 1 of 10)	protein_coding-exon (ENSMUST00000006467.13, exon 1 of 10)	109	ENSMUST00000113819.1	ENSMUSG00000006304	ENSMUST00000185733			Arpc2			protein_coding
e11ve16_common_939	chr1	74284258	74285447	+	0.34979	NA	promoter-TSS (ENSMUST00000006462.13)	protein_coding-promoter-TSS (ENSMUST00000006462.13)	-78	ENSMUST00000113805.7	ENSMUSG00000026179	ENSMUST00000152492			Pnkd			protein_coding
e11ve16_common_940	chr1	74303566	74304468	+	0.63918	NA	exon (ENSMUST00000113796.7, exon 1 of 11)	protein_coding-exon (ENSMUST00000113796.7, exon 1 of 11)	103	ENSMUST00000141560.1	ENSMUSG00000006301	ENSMUST00000152603			Tmbim1			protein_coding
e11ve16_common_941	chr1	74332119	74332992	+	0.56254	NA	promoter-TSS (ENSMUST00000087225.5)	protein_coding-promoter-TSS (ENSMUST00000087225.5)	-55	ENSMUST00000087225.5	ENSMUSG00000026179	ENSMUST00000152492			Pnkd			protein_coding
e11ve16_common_942	chr1	74368083	74368383	+	0.06213	NA	TTS (ENSMUST00000128445.7)	protein_coding-TTS (ENSMUST00000128445.7)	3702	ENSMUST00000186688.1	ENSMUSG00000073650	ENSMUST00000097697			Catip			protein_coding
e11ve16_common_943	chr1	74386699	74387270	+	0.36788	NA	TTS (ENSMUST00000027368.5)	protein_coding-TTS (ENSMUST00000027368.5)	3384	ENSMUST00000134189.1	ENSMUSG00000026177	ENSMUST00000134189			Slc11a1			protein_coding
e11ve16_common_944	chr1	74390707	74392323	+	0.30282	NA	promoter-TSS (ENSMUST00000027367.13)	protein_coding-promoter-TSS (ENSMUST00000027367.13)	6	ENSMUST00000027367.13	ENSMUSG00000026176	ENSMUST00000152659			Ctdsp1			protein_coding
e11ve16_common_945	chr1	74396924	74398338	+	1.00147	NA	TTS (ENSMUST00000027367.13)	protein_coding-TTS (ENSMUST00000027367.13)	3321	ENSMUST00000083534.1	ENSMUSG00000065468	ENSMUST00000083534			Mir26b			miRNA
e11ve16_common_946	chr1	74505371	74506717	+	0.95289	NA	promoter-TSS (ENSMUST00000044260.10)	protein_coding-promoter-TSS (ENSMUST00000044260.10)	-14	ENSMUST00000087215.6	ENSMUSG00000026174	ENSMUST00000137100			Cnot9			protein_coding
e11ve16_common_947	chr1	74587563	74588491	+	0.63468	NA	promoter-TSS (ENSMUST00000027315.13)	protein_coding-promoter-TSS (ENSMUST00000027315.13)	1	ENSMUST00000113737.7	ENSMUSG00000026135	ENSMUST00000066986			Zfp142			protein_coding
e11ve16_common_948	chr1	74600988	74601774	+	0.99086	NA	promoter-TSS (ENSMUST00000027357.11)	protein_coding-promoter-TSS (ENSMUST00000027357.11)	-4	ENSMUST00000113721.7	ENSMUSG00000026171	ENSMUST00000151003			Rnf25			protein_coding
e11ve16_common_949	chr1	74643671	74644035	+	0.85617	NA	Intergenic	Intergenic	17388	ENSMUST00000123154.1	ENSMUSG00000033276	ENSMUST00000155473			Stk36			protein_coding
e11ve16_common_950	chr1	74661471	74662395	+	0.8203	NA	intron (ENSMUST00000129890.7, intron 1 of 4)	protein_coding-intron (ENSMUST00000042125.14, intron 1 of 19)	116	ENSMUST00000153636.7	ENSMUSG00000033257	ENSMUST00000145132			Ttll4			protein_coding
e11ve16_common_951	chr1	74748706	74749449	+	0.54608	NA	promoter-TSS (ENSMUST00000113672.8)	protein_coding-promoter-TSS (ENSMUST00000113672.8)	-122	ENSMUST00000188073.6	ENSMUSG00000006542	ENSMUST00000162093			Prkag3			protein_coding
e11ve16_common_952	chr1	74772659	74773513	+	1.38563	NA	intron (ENSMUST00000006716.7, intron 1 of 3)	protein_coding-intron (ENSMUST00000006716.7, intron 1 of 3)	1194	ENSMUST00000006716.7	ENSMUSG00000033227	ENSMUST00000006716			Wnt6			protein_coding
e11ve16_common_953	chr1	74784148	74784639	+	0.83748	NA	exon (ENSMUST00000006716.7, exon 4 of 4)	protein_coding-exon (ENSMUST00000006716.7, exon 4 of 4)	1954	ENSMUST00000189544.1	ENSMUSG00000033227	ENSMUST00000006716			Wnt6			protein_coding
e11ve16_common_954	chr1	74803163	74803666	+	1.57966	NA	TTS (ENSMUST00000187238.1)	protein_coding-TTS (ENSMUST00000187238.1)	10051	ENSMUST00000187238.1	ENSMUSG00000026167	ENSMUST00000006718			Wnt10a			protein_coding
e11ve16_common_955	chr1	74808066	74808578	+	0.92222	NA	Intergenic	Intergenic	14959	ENSMUST00000187238.1	ENSMUSG00000026167	ENSMUST00000006718			Wnt10a			protein_coding
e11ve16_common_956	chr1	74816760	74817466	+	0.43826	NA	Intergenic	Intergenic	23750	ENSMUST00000187238.1	ENSMUSG00000026167	ENSMUST00000006718			Wnt10a			protein_coding
e11ve16_common_957	chr1	74854566	74855151	+	1.71509	NA	promoter-TSS (ENSMUST00000160379.3)	protein_coding-promoter-TSS (ENSMUST00000160379.3)	-76	ENSMUST00000160379.3	ENSMUSG00000090071	ENSMUST00000160379			Cdk5r2			protein_coding
e11ve16_common_958	chr1	74900464	74901618	+	0.2558	NA	promoter-TSS (ENSMUST00000083682.3)	miRNA-promoter-TSS (ENSMUST00000083682.3)	-320	ENSMUST00000083682.3	ENSMUSG00000065616	ENSMUST00000083682			Mir375			miRNA
e11ve16_common_959	chr1	74951205	74951620	+	1.96061	NA	promoter-TSS (ENSMUST00000189364.1)	protein_coding-promoter-TSS (ENSMUST00000189364.1)	30	ENSMUST00000189364.1	ENSMUSG00000006538	ENSMUST00000164097			Ihh			protein_coding
e11ve16_common_960	chr1	74964701	74965102	+	0.52936	NA	Intergenic	Intergenic	10649	ENSMUST00000194616.1	ENSMUSG00000103145	ENSMUST00000194616			Gm37744			TEC
e11ve16_common_961	chr1	75014112	75014500	+	1.08786	NA	intron (ENSMUST00000152855.1, intron 2 of 4)	protein_coding-intron (ENSMUST00000152855.1, intron 2 of 4)	32333	ENSMUST00000152855.1	ENSMUSG00000026162	ENSMUST00000152855			Nhej1			protein_coding
e11ve16_common_962	chr1	75016117	75017023	+	0.68351	NA	intron (ENSMUST00000152855.1, intron 2 of 4)	protein_coding-intron (ENSMUST00000152855.1, intron 2 of 4)	30069	ENSMUST00000152855.1	ENSMUSG00000026162	ENSMUST00000152855			Nhej1			protein_coding
e11ve16_common_963	chr1	75124612	75125478	+	0.23806	NA	TTS (ENSMUST00000027405.5)	protein_coding-TTS (ENSMUST00000027405.5)	155	ENSMUST00000188033.1	ENSMUSG00000026162	ENSMUST00000152855			Nhej1			protein_coding
e11ve16_common_964	chr1	75141392	75143347	+	0.82592	NA	promoter-TSS (ENSMUST00000097694.10)	protein_coding-promoter-TSS (ENSMUST00000097694.10)	269	ENSMUST00000168720.7	ENSMUSG00000033159	ENSMUST00000041213			Cnppd1			protein_coding
e11ve16_common_965	chr1	75168559	75169310	+	0.72351	NA	promoter-TSS (ENSMUST00000186227.1)	protein_coding-promoter-TSS (ENSMUST00000186227.1)	6	ENSMUST00000186227.1	ENSMUSG00000026197	ENSMUST00000160439			Zfand2b			protein_coding
e11ve16_common_966	chr1	75179709	75180652	+	0.40629	NA	TTS (ENSMUST00000040689.14)	protein_coding-TTS (ENSMUST00000040689.14)	106	ENSMUST00000159219.7	ENSMUSG00000026198	ENSMUST00000161103			Abcb6			protein_coding
e11ve16_common_967	chr1	75191546	75192666	+	0.86815	NA	promoter-TSS (ENSMUST00000040689.14)	protein_coding-promoter-TSS (ENSMUST00000040689.14)	-45	ENSMUST00000151887.8	ENSMUSG00000026199	ENSMUST00000145459			Ankzf1			protein_coding
e11ve16_common_968	chr1	75210530	75211070	+	0.47026	NA	promoter-TSS (ENSMUST00000027401.10)	protein_coding-promoter-TSS (ENSMUST00000027401.10)	13	ENSMUST00000185448.1	ENSMUSG00000026200	ENSMUST00000153584			Glb1l			protein_coding
e11ve16_common_969	chr1	75218392	75219830	+	0.75919	NA	promoter-TSS (ENSMUST00000079464.12)	protein_coding-promoter-TSS (ENSMUST00000079464.12)	132	ENSMUST00000187103.1	ENSMUSG00000026202	ENSMUST00000186213			Tuba4a			protein_coding
e11ve16_common_970	chr1	75236126	75237104	+	0.54	NA	promoter-TSS (ENSMUST00000185654.2)	protein_coding-promoter-TSS (ENSMUST00000185654.2)	1	ENSMUST00000185654.2	ENSMUSG00000026203	ENSMUST00000188290			Dnajb2			protein_coding
e11ve16_common_971	chr1	75316797	75317398	+	0.58413	NA	promoter-TSS (ENSMUST00000113605.9)	protein_coding-promoter-TSS (ENSMUST00000113605.9)	52	ENSMUST00000187836.6	ENSMUSG00000026209	ENSMUST00000187791			Dnpep			protein_coding
e11ve16_common_972	chr1	75381686	75382006	+	2.57832	NA	promoter-TSS (ENSMUST00000113590.7)	protein_coding-promoter-TSS (ENSMUST00000113590.7)	-268	ENSMUST00000113590.7	ENSMUSG00000026207	ENSMUST00000087122			Speg			protein_coding
e11ve16_common_973	chr1	75388273	75388631	+	1.76779	NA	TTS (ENSMUST00000125118.1)	protein_coding-TTS (ENSMUST00000125118.1)	2842	ENSMUST00000137868.7	ENSMUSG00000026207	ENSMUST00000087122			Speg			protein_coding
e11ve16_common_974	chr1	75398769	75398969	+	0.98276	NA	intron (ENSMUST00000087122.11, intron 6 of 40)	protein_coding-intron (ENSMUST00000087122.11, intron 6 of 40)	-1216	ENSMUST00000113589.7	ENSMUSG00000026207	ENSMUST00000087122			Speg			protein_coding
e11ve16_common_975	chr1	75423031	75423264	+	2.01092	NA	promoter-TSS (ENSMUST00000143679.1)	protein_coding-promoter-TSS (ENSMUST00000143679.1)	-363	ENSMUST00000143679.1	ENSMUSG00000026207	ENSMUST00000087122			Speg			protein_coding
e11ve16_common_976	chr1	75435682	75436389	+	0.90807	NA	promoter-TSS (ENSMUST00000113584.7)	protein_coding-promoter-TSS (ENSMUST00000113584.7)	51	ENSMUST00000140287.7	ENSMUSG00000033021	ENSMUST00000037796			Gmppa			protein_coding
e11ve16_common_977	chr1	75450123	75450415	+	1.60095	NA	promoter-TSS (ENSMUST00000037708.9)	protein_coding-promoter-TSS (ENSMUST00000037708.9)	-167	ENSMUST00000113577.7	ENSMUSG00000033007	ENSMUST00000037708			Asic4			protein_coding
e11ve16_common_978	chr1	75458695	75458931	+	2.60477	NA	intron (ENSMUST00000113577.7, intron 1 of 8)	protein_coding-intron (ENSMUST00000037708.9, intron 1 of 9)	8114	ENSMUST00000037708.9	ENSMUSG00000033007	ENSMUST00000037708			Asic4			protein_coding
e11ve16_common_979	chr1	75479213	75479762	+	1.53896	NA	promoter-TSS (ENSMUST00000050899.6)	protein_coding-promoter-TSS (ENSMUST00000050899.6)	-45	ENSMUST00000113575.8	ENSMUSG00000051703	ENSMUST00000187411			Tmem198			protein_coding
e11ve16_common_980	chr1	75487210	75488081	+	0.96071	NA	promoter-TSS (ENSMUST00000156499.1)	protein_coding-promoter-TSS (ENSMUST00000156499.1)	157	ENSMUST00000154636.1	ENSMUSG00000026211	ENSMUST00000113567			Obsl1			protein_coding
e11ve16_common_981	chr1	75505387	75506712	+	1.77545	NA	promoter-TSS (ENSMUST00000155084.7)	protein_coding-promoter-TSS (ENSMUST00000155084.7)	312	ENSMUST00000129403.7	ENSMUSG00000026211	ENSMUST00000113567			Obsl1			protein_coding
e11ve16_common_982	chr1	75521258	75522007	+	1.06483	NA	promoter-TSS (ENSMUST00000113553.1)	protein_coding-promoter-TSS (ENSMUST00000113553.1)	80	ENSMUST00000113553.1	ENSMUSG00000026213	ENSMUST00000156838			Stk11ip			protein_coding
e11ve16_common_983	chr1	75546080	75546944	+	0.30647	NA	promoter-TSS (ENSMUST00000027415.11)	protein_coding-promoter-TSS (ENSMUST00000027415.11)	-15	ENSMUST00000145516.1	ENSMUSG00000006576	ENSMUST00000027415			Slc4a3			protein_coding
e11ve16_common_984	chr1	75559269	75559930	+	0.11831	NA	TTS (ENSMUST00000027415.11)	protein_coding-TTS (ENSMUST00000027415.11)	7890	ENSMUST00000132110.1	ENSMUSG00000006576	ENSMUST00000027415			Slc4a3			protein_coding
e11ve16_common_985	chr1	75589125	75589335	+	0.36222	NA	Intergenic	Intergenic	21147	ENSMUST00000117745.1	ENSMUSG00000083244	ENSMUST00000117745			Gm15180			processed_pseudogene
e11ve16_common_986	chr1	75936685	75937498	+	1.15926	NA	Intergenic	Intergenic	81665	ENSMUST00000188786.1	ENSMUSG00000099996	ENSMUST00000188786			Gm29065			lncRNA
e11ve16_common_987	chr1	76018980	76019625	+	0.73193	NA	promoter-TSS (ENSMUST00000188786.1)	lncRNA-promoter-TSS (ENSMUST00000188786.1)	-546	ENSMUST00000188786.1	ENSMUSG00000099996	ENSMUST00000188786			Gm29065			lncRNA
e11ve16_common_988	chr1	76024610	76025603	+	0.07633	NA	Intergenic	Intergenic	-6350	ENSMUST00000188786.1	ENSMUSG00000099996	ENSMUST00000188786			Gm29065			lncRNA
e11ve16_common_989	chr1	76030667	76031506	+	0.46625	NA	Intergenic	Intergenic	-12330	ENSMUST00000188786.1	ENSMUSG00000099996	ENSMUST00000188786			Gm29065			lncRNA
e11ve16_common_990	chr1	76529744	76530000	+	0.14258	NA	Intergenic	Intergenic	20312	ENSMUST00000183584.1	ENSMUSG00000098611	ENSMUST00000183584			Mir6343			miRNA
e11ve16_common_991	chr1	76942526	76943682	+	0.21165	NA	intron (ENSMUST00000191156.1, intron 1 of 1)	lncRNA-intron (ENSMUST00000191156.1, intron 1 of 1)	84688	ENSMUST00000191156.1	ENSMUSG00000100534	ENSMUST00000191156			Gm816			lncRNA
e11ve16_common_992	chr1	77051329	77051729	+	0.33393	NA	Intergenic	Intergenic	-23737	ENSMUST00000191156.1	ENSMUSG00000100534	ENSMUST00000191156			Gm816			lncRNA
e11ve16_common_993	chr1	77184180	77184966	+	0.63313	NA	Intergenic	Intergenic	-37581	ENSMUST00000193479.1	ENSMUSG00000102904	ENSMUST00000193479			Gm38265			TEC
e11ve16_common_994	chr1	77213371	77214092	+	1.10885	NA	Intergenic	Intergenic	-66739	ENSMUST00000193479.1	ENSMUSG00000102904	ENSMUST00000193479			Gm38265			TEC
e11ve16_common_995	chr1	77226914	77227288	+	0.29084	NA	Intergenic	Intergenic	-80109	ENSMUST00000193479.1	ENSMUSG00000102904	ENSMUST00000193479			Gm38265			TEC
e11ve16_common_996	chr1	77258670	77259326	+	0.82829	NA	Intergenic	Intergenic	-112006	ENSMUST00000193479.1	ENSMUSG00000102904	ENSMUST00000193479			Gm38265			TEC
e11ve16_common_997	chr1	77468890	77469494	+	0.24605	NA	intron (ENSMUST00000027451.12, intron 3 of 17)	protein_coding-intron (ENSMUST00000027451.12, intron 3 of 17)	27576	ENSMUST00000184495.1	ENSMUSG00000099141	ENSMUST00000184495			Mir6352			miRNA
e11ve16_common_998	chr1	77473676	77473909	+	0.66627	NA	intron (ENSMUST00000027451.12, intron 3 of 17)	protein_coding-intron (ENSMUST00000027451.12, intron 3 of 17)	22976	ENSMUST00000184495.1	ENSMUSG00000099141	ENSMUST00000184495			Mir6352			miRNA
e11ve16_common_999	chr1	77513623	77513857	+	0.3206	NA	intron (ENSMUST00000027451.12, intron 1 of 17)	protein_coding-intron (ENSMUST00000027451.12, intron 1 of 17)	1339	ENSMUST00000190149.6	ENSMUSG00000026235	ENSMUST00000188797			Epha4			protein_coding
e11ve16_common_1000	chr1	77514428	77516754	+	0.68851	NA	promoter-TSS (ENSMUST00000027451.12)	protein_coding-promoter-TSS (ENSMUST00000027451.12)	311	ENSMUST00000189147.1	ENSMUSG00000101849	ENSMUST00000189147			Gm28386			lncRNA
e11ve16_common_1001	chr1	77981413	77982333	+	0.14134	NA	Intergenic	Intergenic	-9497	ENSMUST00000189245.1	ENSMUSG00000102052	ENSMUST00000189245			Gm28387			lncRNA
e11ve16_common_1002	chr1	78008960	78009426	+	0.02968	NA	Intergenic	Intergenic	-36817	ENSMUST00000189245.1	ENSMUSG00000102052	ENSMUST00000189245			Gm28387			lncRNA
e11ve16_common_1003	chr1	78196582	78196820	+	1.51644	NA	exon (ENSMUST00000004994.15, exon 1 of 9)	protein_coding-exon (ENSMUST00000004994.15, exon 1 of 9)	137	ENSMUST00000004994.15	ENSMUSG00000004872	ENSMUST00000004994			Pax3			protein_coding
e11ve16_common_1004	chr1	78216039	78217668	+	1.07682	NA	exon (ENSMUST00000238744.1, exon 1 of 1)	processed_pseudogene-exon (ENSMUST00000238744.1, exon 1 of 1)	623	ENSMUST00000238744.1	ENSMUSG00000118426	ENSMUST00000238744			Gm2102			processed_pseudogene
e11ve16_common_1005	chr1	78309877	78310796	+	1.99116	NA	promoter-TSS (ENSMUST00000036172.9)	protein_coding-promoter-TSS (ENSMUST00000036172.9)	-9	ENSMUST00000036172.9	ENSMUSG00000032908	ENSMUST00000036172			Sgpp2			protein_coding
e11ve16_common_1006	chr1	78310901	78311192	+	2.27108	NA	intron (ENSMUST00000036172.9, intron 1 of 4)	protein_coding-intron (ENSMUST00000036172.9, intron 1 of 4)	701	ENSMUST00000036172.9	ENSMUSG00000032908	ENSMUST00000036172			Sgpp2			protein_coding
e11ve16_common_1007	chr1	78488523	78489656	+	0.54305	NA	promoter-TSS (ENSMUST00000068333.13)	protein_coding-promoter-TSS (ENSMUST00000068333.13)	-192	ENSMUST00000068333.13	ENSMUSG00000026245	ENSMUST00000170217			Farsb			protein_coding
e11ve16_common_1008	chr1	78511509	78512149	+	1.09174	NA	promoter-TSS (ENSMUST00000012331.6)	protein_coding-promoter-TSS (ENSMUST00000012331.6)	17	ENSMUST00000152111.1	ENSMUSG00000012187	ENSMUST00000149732			Mogat1			protein_coding
e11ve16_common_1009	chr1	78536748	78537846	+	0.12781	NA	promoter-TSS (ENSMUST00000125458.1)	protein_coding-promoter-TSS (ENSMUST00000125458.1)	-331	ENSMUST00000125458.1	ENSMUSG00000012187	ENSMUST00000149732			Mogat1			protein_coding
e11ve16_common_1010	chr1	78573852	78574112	+	0.41323	NA	Intergenic	Intergenic	35526	ENSMUST00000190504.1	ENSMUSG00000099364	ENSMUST00000190504			5730419F03Rik			lncRNA
e11ve16_common_1011	chr1	78634536	78634821	+	0.14933	NA	Intergenic	Intergenic	19211	ENSMUST00000186132.1	ENSMUSG00000100562	ENSMUST00000186132			Gm29611			lncRNA
e11ve16_common_1012	chr1	78647117	78647538	+	2.17453	NA	Intergenic	Intergenic	-10498	ENSMUST00000035779.14	ENSMUSG00000032883	ENSMUST00000142704			Acsl3			protein_coding
e11ve16_common_1013	chr1	78656649	78657308	+	1.0272	NA	promoter-TSS (ENSMUST00000035779.14)	protein_coding-promoter-TSS (ENSMUST00000035779.14)	-847	ENSMUST00000035779.14	ENSMUSG00000032883	ENSMUST00000142704			Acsl3			protein_coding
e11ve16_common_1014	chr1	78657602	78658909	+	0.82343	NA	promoter-TSS (ENSMUST00000151622.1)	protein_coding-promoter-TSS (ENSMUST00000151622.1)	-185	ENSMUST00000151622.1	ENSMUSG00000079470	ENSMUST00000151622			Utp14b			protein_coding
e11ve16_common_1015	chr1	78724685	78725052	+	0.03477	NA	Intergenic	Intergenic	28212	ENSMUST00000148608.1	ENSMUSG00000032883	ENSMUST00000142704			Acsl3			protein_coding
e11ve16_common_1016	chr1	79439788	79440510	+	0.24387	NA	promoter-TSS (ENSMUST00000049972.5)	protein_coding-promoter-TSS (ENSMUST00000049972.5)	-29	ENSMUST00000049972.5	ENSMUSG00000050711	ENSMUST00000049972			Scg2			protein_coding
e11ve16_common_1017	chr1	79580974	79581719	+	1.44539	NA	Intergenic	Intergenic	39688	ENSMUST00000195349.1	ENSMUSG00000102235	ENSMUST00000195349			Gm37886			TEC
e11ve16_common_1018	chr1	79671355	79672644	+	0.51815	NA	promoter-TSS (ENSMUST00000159312.1)	protein_coding-promoter-TSS (ENSMUST00000159312.1)	-27	ENSMUST00000162342.7	ENSMUSG00000054702	ENSMUST00000160706			Ap1s3			protein_coding
e11ve16_common_1019	chr1	79678198	79678488	+	1.44196	NA	Intergenic	Intergenic	-6371	ENSMUST00000162342.7	ENSMUSG00000054702	ENSMUST00000160706			Ap1s3			protein_coding
e11ve16_common_1020	chr1	79696996	79697435	+	0.83635	NA	Intergenic	Intergenic	-25243	ENSMUST00000162342.7	ENSMUSG00000054702	ENSMUST00000160706			Ap1s3			protein_coding
e11ve16_common_1021	chr1	79697599	79698089	+	0.21386	NA	Intergenic	Intergenic	24812	ENSMUST00000127771.7	ENSMUSG00000073643	ENSMUST00000187005			Wdfy1			protein_coding
e11ve16_common_1022	chr1	79746429	79746664	+	0.60161	NA	intron (ENSMUST00000113512.7, intron 1 of 11)	protein_coding-intron (ENSMUST00000048820.13, intron 1 of 4)	15175	ENSMUST00000186464.1	ENSMUSG00000073643	ENSMUST00000187005			Wdfy1			protein_coding
e11ve16_common_1023	chr1	79760850	79762175	+	1.07841	NA	intron (ENSMUST00000113512.7, intron 1 of 11)	protein_coding-intron (ENSMUST00000048820.13, intron 1 of 4)	209	ENSMUST00000186464.1	ENSMUSG00000073643	ENSMUST00000187005			Wdfy1			protein_coding
e11ve16_common_1024	chr1	79775734	79776570	+	0.6971	NA	promoter-TSS (ENSMUST00000143368.7)	protein_coding-promoter-TSS (ENSMUST00000143368.7)	-9	ENSMUST00000143368.7	ENSMUSG00000073643	ENSMUST00000187005			Wdfy1			protein_coding
e11ve16_common_1025	chr1	79857897	79859273	+	0.57455	NA	promoter-TSS (ENSMUST00000191026.1)	protein_coding-promoter-TSS (ENSMUST00000191026.1)	50	ENSMUST00000191026.1	ENSMUSG00000026249	ENSMUST00000027467			Serpine2			protein_coding
e11ve16_common_1026	chr1	79891045	79891402	+	0.52795	NA	Intergenic	Intergenic	-30043	ENSMUST00000190724.1	ENSMUSG00000026249	ENSMUST00000027467			Serpine2			protein_coding
e11ve16_common_1027	chr1	79932065	79932481	+	0.19513	NA	Intergenic	Intergenic	-8847	ENSMUST00000165691.2	ENSMUSG00000067106	ENSMUST00000165691			Gm5529			processed_pseudogene
e11ve16_common_1028	chr1	80180819	80181256	+	0.70481	NA	Intergenic	Intergenic	-3682	ENSMUST00000191325.1	ENSMUSG00000099552	ENSMUST00000185548			9830004L10Rik			lncRNA
e11ve16_common_1029	chr1	80339738	80340268	+	0.57894	NA	intron (ENSMUST00000167293.1, intron 1 of 5)	protein_coding-intron (ENSMUST00000163119.7, intron 1 of 15)	276	ENSMUST00000167293.1	ENSMUSG00000004364	ENSMUST00000163119			Cul3			protein_coding
e11ve16_common_1030	chr1	81287145	81287425	+	0.02452	NA	intron (ENSMUST00000137862.7, intron 6 of 6)	protein_coding-intron (ENSMUST00000113494.8, intron 5 of 5)	209702	ENSMUST00000123285.1	ENSMUSG00000054976	ENSMUST00000123720			Nyap2			protein_coding
e11ve16_common_1031	chr1	81520684	81521385	+	1.22512	NA	exon (ENSMUST00000192484.1, exon 1 of 1)	TEC-exon (ENSMUST00000192484.1, exon 1 of 1)	1307	ENSMUST00000192484.1	ENSMUSG00000104029	ENSMUST00000192484			Gm37210			TEC
e11ve16_common_1032	chr1	81593339	81594913	+	0.46676	NA	Intergenic	Intergenic	-36643	ENSMUST00000191337.1	ENSMUSG00000101986	ENSMUST00000191337			Gm6198			processed_pseudogene
e11ve16_common_1033	chr1	81718023	81718952	+	0.59507	NA	Intergenic	Intergenic	24482	ENSMUST00000117185.1	ENSMUSG00000087008	ENSMUST00000117185			Gm5530			processed_pseudogene
e11ve16_common_1034	chr1	81744350	81745268	+	0.09534	NA	Intergenic	Intergenic	-1840	ENSMUST00000117185.1	ENSMUSG00000087008	ENSMUST00000117185			Gm5530			processed_pseudogene
e11ve16_common_1035	chr1	81754002	81755820	+	0.3309	NA	Intergenic	Intergenic	-11942	ENSMUST00000117185.1	ENSMUSG00000087008	ENSMUST00000117185			Gm5530			processed_pseudogene
e11ve16_common_1036	chr1	81900592	81900984	+	0.79011	NA	Intergenic	Intergenic	103547	ENSMUST00000186198.1	ENSMUSG00000100561	ENSMUST00000186198			Gm7516			processed_pseudogene
e11ve16_common_1037	chr1	82070229	82071048	+	0.78174	NA	Intergenic	Intergenic	-34542	ENSMUST00000195065.1	ENSMUSG00000103571	ENSMUST00000195065			Gm37114			TEC
e11ve16_common_1038	chr1	82124473	82124873	+	1.45484	NA	Intergenic	Intergenic	-7243	ENSMUST00000183462.1	ENSMUSG00000098797	ENSMUST00000183462			Mir6344			miRNA
e11ve16_common_1039	chr1	82203898	82204214	+	0.91988	NA	Intergenic	Intergenic	-29056	ENSMUST00000023262.5	ENSMUSG00000022591	ENSMUST00000023262			Gm9747			protein_coding
e11ve16_common_1040	chr1	82220773	82221682	+	0.62993	NA	Intergenic	Intergenic	-11885	ENSMUST00000023262.5	ENSMUSG00000022591	ENSMUST00000023262			Gm9747			protein_coding
e11ve16_common_1041	chr1	82273942	82274224	+	0.05037	NA	intron (ENSMUST00000069799.2, intron 1 of 1)	protein_coding-intron (ENSMUST00000069799.2, intron 1 of 1)	17333	ENSMUST00000069799.2	ENSMUSG00000055980	ENSMUST00000069799			Irs1			protein_coding
e11ve16_common_1042	chr1	82283056	82283690	+	0.16664	NA	intron (ENSMUST00000069799.2, intron 1 of 1)	protein_coding-intron (ENSMUST00000069799.2, intron 1 of 1)	8043	ENSMUST00000069799.2	ENSMUSG00000055980	ENSMUST00000069799			Irs1			protein_coding
e11ve16_common_1043	chr1	82284054	82284262	+	0.02742	NA	intron (ENSMUST00000069799.2, intron 1 of 1)	protein_coding-intron (ENSMUST00000069799.2, intron 1 of 1)	7258	ENSMUST00000069799.2	ENSMUSG00000055980	ENSMUST00000069799			Irs1			protein_coding
e11ve16_common_1044	chr1	82290370	82291334	+	0.80454	NA	exon (ENSMUST00000069799.2, exon 1 of 2)	protein_coding-exon (ENSMUST00000069799.2, exon 1 of 2)	564	ENSMUST00000069799.2	ENSMUSG00000055980	ENSMUST00000069799			Irs1			protein_coding
e11ve16_common_1045	chr1	82291637	82292543	+	0.96791	NA	promoter-TSS (ENSMUST00000069799.2)	protein_coding-promoter-TSS (ENSMUST00000069799.2)	-674	ENSMUST00000069799.2	ENSMUSG00000055980	ENSMUST00000069799			Irs1			protein_coding
e11ve16_common_1046	chr1	82292660	82292963	+	1.8041	NA	Intergenic	Intergenic	-1395	ENSMUST00000069799.2	ENSMUSG00000055980	ENSMUST00000069799			Irs1			protein_coding
e11ve16_common_1047	chr1	82316229	82317032	+	0.62543	NA	promoter-TSS (ENSMUST00000187475.1)	protein_coding-promoter-TSS (ENSMUST00000187475.1)	-12	ENSMUST00000187475.1	ENSMUSG00000026142	ENSMUST00000027322			Rhbdd1			protein_coding
e11ve16_common_1048	chr1	82476435	82477380	+	1.09847	NA	intron (ENSMUST00000087050.6, intron 37 of 47)	protein_coding-intron (ENSMUST00000087050.6, intron 37 of 47)	-74161	ENSMUST00000187929.1	ENSMUSG00000100786	ENSMUST00000187929			Gm28940			lncRNA
e11ve16_common_1049	chr1	82554559	82555318	+	0.08268	NA	intron (ENSMUST00000135271.1, intron 4 of 6)	protein_coding-intron (ENSMUST00000087050.6, intron 4 of 47)	31854	ENSMUST00000135271.1	ENSMUSG00000067158	ENSMUST00000087050			Col4a4			protein_coding
e11ve16_common_1050	chr1	82577483	82577871	+	1.08571	NA	intron (ENSMUST00000087050.6, intron 1 of 47)	protein_coding-intron (ENSMUST00000087050.6, intron 1 of 47)	9115	ENSMUST00000135271.1	ENSMUSG00000067158	ENSMUST00000087050			Col4a4			protein_coding
e11ve16_common_1051	chr1	82578048	82578263	+	2.21064	NA	intron (ENSMUST00000087050.6, intron 1 of 47)	protein_coding-intron (ENSMUST00000087050.6, intron 1 of 47)	8637	ENSMUST00000135271.1	ENSMUSG00000067158	ENSMUST00000087050			Col4a4			protein_coding
e11ve16_common_1052	chr1	82586374	82586616	+	0.69993	NA	promoter-TSS (ENSMUST00000113457.8)	protein_coding-promoter-TSS (ENSMUST00000113457.8)	297	ENSMUST00000135271.1	ENSMUSG00000067158	ENSMUST00000087050			Col4a4			protein_coding
e11ve16_common_1053	chr1	82603805	82604035	+	1.32967	NA	intron (ENSMUST00000141994.1, intron 1 of 1)	protein_coding-intron (ENSMUST00000113457.8, intron 1 of 51)	16944	ENSMUST00000113457.8	ENSMUSG00000079465	ENSMUST00000113457			Col4a3			protein_coding
e11ve16_common_1054	chr1	82641195	82641842	+	0.04539	NA	exon (ENSMUST00000141994.1, exon 2 of 2)	protein_coding-exon (ENSMUST00000141994.1, exon 2 of 2)	6505	ENSMUST00000083121.1	ENSMUSG00000065055	ENSMUST00000083121			n-R5s213			rRNA
e11ve16_common_1055	chr1	82717681	82717939	+	1.01824	NA	intron (ENSMUST00000152664.1, intron 3 of 3)	protein_coding-intron (ENSMUST00000113457.8, intron 50 of 51)	2506	ENSMUST00000125563.7	ENSMUSG00000079465	ENSMUST00000113457			Col4a3			protein_coding
e11ve16_common_1056	chr1	82724752	82725397	+	0.57722	NA	promoter-TSS (ENSMUST00000181720.1)	lncRNA-promoter-TSS (ENSMUST00000181720.1)	43	ENSMUST00000181720.1	ENSMUSG00000097564	ENSMUST00000187869			C430014B12Rik			lncRNA
e11ve16_common_1057	chr1	82787283	82787779	+	0.46439	NA	Intergenic	Intergenic	-10321	ENSMUST00000186121.1	ENSMUSG00000099771	ENSMUST00000186121			Gm19257			processed_pseudogene
e11ve16_common_1058	chr1	82815259	82816262	+	0.32556	NA	Intergenic	Intergenic	-4075	ENSMUST00000186334.1	ENSMUSG00000100170	ENSMUST00000186334			Gm28942			lncRNA
e11ve16_common_1059	chr1	82839131	82840287	+	0.41896	NA	promoter-TSS (ENSMUST00000063380.10)	protein_coding-promoter-TSS (ENSMUST00000063380.10)	-25	ENSMUST00000190046.6	ENSMUSG00000026159	ENSMUST00000186043			Agfg1			protein_coding
e11ve16_common_1060	chr1	82942811	82943160	+	0.80091	NA	exon (ENSMUST00000222600.1, exon 1 of 1)	protein_coding-exon (ENSMUST00000222600.1, exon 1 of 1)	403	ENSMUST00000222600.1	ENSMUSG00000113084	ENSMUST00000222600			A030003K21Rik			protein_coding
e11ve16_common_1061	chr1	83037804	83038835	+	0.31744	NA	intron (ENSMUST00000045560.14, intron 1 of 6)	protein_coding-intron (ENSMUST00000045560.14, intron 1 of 6)	112	ENSMUST00000164473.1	ENSMUSG00000038496	ENSMUST00000164473			Slc19a3			protein_coding
e11ve16_common_1062	chr1	83075914	83076540	+	0.1123	NA	Intergenic	Intergenic	9125	ENSMUST00000190858.1	ENSMUSG00000099691	ENSMUST00000190858			Gm29518			processed_pseudogene
e11ve16_common_1063	chr1	83099599	83099882	+	2.05566	NA	Intergenic	Intergenic	-17026	ENSMUST00000027351.12	ENSMUSG00000026166	ENSMUST00000113437			Ccl20			protein_coding
e11ve16_common_1064	chr1	83135503	83136471	+	0.43534	NA	Intergenic	Intergenic	19194	ENSMUST00000186832.1	ENSMUSG00000026166	ENSMUST00000113437			Ccl20			protein_coding
e11ve16_common_1065	chr1	83159390	83160315	+	0.52497	NA	promoter-TSS (ENSMUST00000065403.6)	protein_coding-promoter-TSS (ENSMUST00000065403.6)	71	ENSMUST00000065403.6	ENSMUSG00000053161	ENSMUST00000133079			Daw1			protein_coding
e11ve16_common_1066	chr1	83407162	83407634	+	1.28405	NA	intron (ENSMUST00000160567.1, intron 1 of 1)	protein_coding-intron (ENSMUST00000053075.14, intron 1 of 9)	741	ENSMUST00000160237.1	ENSMUSG00000026163	ENSMUST00000160953			Sphkap			protein_coding
e11ve16_common_1067	chr1	83407829	83408510	+	1.16289	NA	promoter-TSS (ENSMUST00000053075.14)	protein_coding-promoter-TSS (ENSMUST00000053075.14)	-4	ENSMUST00000160567.1	ENSMUSG00000026163	ENSMUST00000160953			Sphkap			protein_coding
e11ve16_common_1068	chr1	84284306	84285048	+	0.93975	NA	promoter-TSS (ENSMUST00000168574.8)	protein_coding-promoter-TSS (ENSMUST00000168574.8)	-32	ENSMUST00000168574.8	ENSMUSG00000045658	ENSMUST00000187992			Pid1			protein_coding
e11ve16_common_1069	chr1	84395435	84396498	+	0.3802	NA	promoter-TSS (ENSMUST00000191700.1)	TEC-promoter-TSS (ENSMUST00000191700.1)	-567	ENSMUST00000191700.1	ENSMUSG00000104396	ENSMUST00000191700			Gm37959			TEC
e11ve16_common_1070	chr1	84405002	84405271	+	1.33808	NA	intron (ENSMUST00000049126.12, intron 10 of 12)	protein_coding-intron (ENSMUST00000049126.12, intron 10 of 12)	-9737	ENSMUST00000191700.1	ENSMUSG00000104396	ENSMUST00000191700			Gm37959			TEC
e11ve16_common_1071	chr1	84695269	84696398	+	0.62294	NA	promoter-TSS (ENSMUST00000175513.1)	miRNA-promoter-TSS (ENSMUST00000175513.1)	-6	ENSMUST00000175513.1	ENSMUSG00000093254	ENSMUST00000175513			Mir5126			miRNA
e11ve16_common_1072	chr1	84737078	84737343	+	0.17584	NA	intron (ENSMUST00000186648.6, intron 32 of 40)	protein_coding-intron (ENSMUST00000027421.12, intron 32 of 40)	-5436	ENSMUST00000185720.1	ENSMUSG00000026219	ENSMUST00000185672			Trip12			protein_coding
e11ve16_common_1073	chr1	84838368	84840456	+	0.75908	NA	promoter-TSS (ENSMUST00000027421.12)	protein_coding-promoter-TSS (ENSMUST00000027421.12)	-101	ENSMUST00000185909.6	ENSMUSG00000026219	ENSMUST00000185672			Trip12			protein_coding
e11ve16_common_1074	chr1	84869505	84869765	+	0.28717	NA	exon (ENSMUST00000151737.1, exon 1 of 4)	protein_coding-exon (ENSMUST00000151737.1, exon 1 of 4)	484	ENSMUST00000151737.1	ENSMUSG00000073633	ENSMUST00000139562			Fbxo36			protein_coding
e11ve16_common_1075	chr1	84995094	84995309	+	0.13077	NA	intron (ENSMUST00000159114.1, intron 2 of 2)	protein_coding-intron (ENSMUST00000159114.1, intron 2 of 2)	-2169	ENSMUST00000188363.1	ENSMUSG00000099693	ENSMUST00000188363			Gm29284			unprocessed_pseudogene
e11ve16_common_1076	chr1	85581723	85582014	+	1.30268	NA	intron (ENSMUST00000131950.7, intron 9 of 10)	protein_coding-intron (ENSMUST00000093508.6, intron 9 of 11)	2410	ENSMUST00000186740.1	ENSMUSG00000070034	ENSMUST00000152399			Sp110			protein_coding
e11ve16_common_1077	chr1	85650058	85650427	+	0.20295	NA	intron (ENSMUST00000147552.7, intron 1 of 15)	protein_coding-intron (ENSMUST00000054279.14, intron 1 of 11)	192	ENSMUST00000066427.10	ENSMUSG00000026222	ENSMUST00000141709			Sp100			protein_coding
e11ve16_common_1078	chr1	85703180	85703399	+	0.68375	NA	promoter-TSS (ENSMUST00000141709.1)	protein_coding-promoter-TSS (ENSMUST00000141709.1)	-153	ENSMUST00000141709.1	ENSMUSG00000026222	ENSMUST00000141709			Sp100			protein_coding
e11ve16_common_1079	chr1	85703818	85704033	+	1.40357	NA	intron (ENSMUST00000141709.1, intron 1 of 4)	protein_coding-intron (ENSMUST00000066427.10, intron 17 of 19)	483	ENSMUST00000141709.1	ENSMUSG00000026222	ENSMUST00000141709			Sp100			protein_coding
e11ve16_common_1080	chr1	85735931	85736732	+	0.45906	NA	intron (ENSMUST00000159325.2, intron 1 of 2)	protein_coding-intron (ENSMUST00000064788.13, intron 1 of 5)	223	ENSMUST00000161453.1	ENSMUSG00000052760	ENSMUST00000162038			A630001G21Rik			protein_coding
e11ve16_common_1081	chr1	85741060	85741418	+	1.219	NA	intron (ENSMUST00000159122.7, intron 3 of 7)	protein_coding-intron (ENSMUST00000159122.7, intron 3 of 7)	-4610	ENSMUST00000064788.13	ENSMUSG00000052760	ENSMUST00000162038			A630001G21Rik			protein_coding
e11ve16_common_1082	chr1	85793121	85793912	+	0.90916	NA	promoter-TSS (ENSMUST00000097666.3)	protein_coding-promoter-TSS (ENSMUST00000097666.3)	-25	ENSMUST00000126962.2	ENSMUSG00000036707	ENSMUST00000130754			Cab39			protein_coding
e11ve16_common_1083	chr1	85799963	85800303	+	1.52658	NA	intron (ENSMUST00000097666.3, intron 2 of 9)	protein_coding-intron (ENSMUST00000097666.3, intron 2 of 9)	5622	ENSMUST00000097666.3	ENSMUSG00000036707	ENSMUST00000130754			Cab39			protein_coding
e11ve16_common_1084	chr1	85839169	85839615	+	0.24338	NA	intron (ENSMUST00000113360.7, intron 4 of 8)	protein_coding-intron (ENSMUST00000097666.3, intron 5 of 9)	-3688	ENSMUST00000187623.1	ENSMUSG00000036707	ENSMUST00000130754			Cab39			protein_coding
e11ve16_common_1085	chr1	85894249	85895728	+	0.85874	NA	intron (ENSMUST00000027425.15, intron 1 of 5)	protein_coding-intron (ENSMUST00000027425.15, intron 1 of 5)	369	ENSMUST00000185569.1	ENSMUSG00000026223	ENSMUST00000139837			Itm2c			protein_coding
e11ve16_common_1086	chr1	85908861	85909868	+	1.22216	NA	TTS (ENSMUST00000027425.15)	protein_coding-TTS (ENSMUST00000027425.15)	3203	ENSMUST00000139837.1	ENSMUSG00000026223	ENSMUST00000139837			Itm2c			protein_coding
e11ve16_common_1087	chr1	85916072	85916993	+	0.56379	NA	Intergenic	Intergenic	10371	ENSMUST00000139837.1	ENSMUSG00000026223	ENSMUST00000139837			Itm2c			protein_coding
e11ve16_common_1088	chr1	85917265	85917500	+	2.06187	NA	Intergenic	Intergenic	-11101	ENSMUST00000027426.10	ENSMUSG00000026224	ENSMUST00000027426			4933407L21Rik			protein_coding
e11ve16_common_1089	chr1	86018120	86018423	+	2.12503	NA	exon (ENSMUST00000149469.2, exon 1 of 4)	protein_coding-exon (ENSMUST00000149469.2, exon 1 of 4)	203	ENSMUST00000149469.2	ENSMUSG00000026226	ENSMUST00000159876			Spata3			protein_coding
e11ve16_common_1090	chr1	86038463	86038778	+	0.46814	NA	Intergenic	Intergenic	-7243	ENSMUST00000027429.10	ENSMUSG00000026227	ENSMUST00000027429			2810459M11Rik			protein_coding
e11ve16_common_1091	chr1	86045762	86046636	+	0.83947	NA	exon (ENSMUST00000027429.10, exon 1 of 3)	protein_coding-exon (ENSMUST00000027429.10, exon 1 of 3)	336	ENSMUST00000165824.2	ENSMUSG00000026227	ENSMUST00000027429			2810459M11Rik			protein_coding
e11ve16_common_1092	chr1	86046776	86046999	+	1.95418	NA	intron (ENSMUST00000027429.10, intron 1 of 2)	protein_coding-intron (ENSMUST00000027429.10, intron 1 of 2)	1024	ENSMUST00000165824.2	ENSMUSG00000026227	ENSMUST00000027429			2810459M11Rik			protein_coding
e11ve16_common_1093	chr1	86059101	86059759	+	1.40122	NA	Intergenic	Intergenic	-4957	ENSMUST00000143200.7	ENSMUSG00000026229	ENSMUST00000147807			Psmd1			protein_coding
e11ve16_common_1094	chr1	86064284	86065228	+	0.48816	NA	promoter-TSS (ENSMUST00000127104.1)	protein_coding-promoter-TSS (ENSMUST00000127104.1)	64	ENSMUST00000133480.7	ENSMUSG00000026229	ENSMUST00000147807			Psmd1			protein_coding
e11ve16_common_1095	chr1	86154177	86155075	+	0.61033	NA	promoter-TSS (ENSMUST00000027434.14)	protein_coding-promoter-TSS (ENSMUST00000027434.14)	-154	ENSMUST00000123618.7	ENSMUSG00000062590	ENSMUST00000131412			Armc9			protein_coding
e11ve16_common_1096	chr1	86181929	86182238	+	0.03026	NA	intron (ENSMUST00000131412.7, intron 9 of 20)	protein_coding-intron (ENSMUST00000027434.14, intron 9 of 24)	-14307	ENSMUST00000150059.7	ENSMUSG00000062590	ENSMUST00000131412			Armc9			protein_coding
e11ve16_common_1097	chr1	86302868	86304047	+	0.91795	NA	promoter-TSS (ENSMUST00000188695.1)	protein_coding-promoter-TSS (ENSMUST00000188695.1)	-74	ENSMUST00000188695.1	ENSMUSG00000079445	ENSMUST00000189618			B3gnt7			protein_coding
e11ve16_common_1098	chr1	86310695	86311206	+	1.7382	NA	Intergenic	Intergenic	-6891	ENSMUST00000187004.1	ENSMUSG00000099644	ENSMUST00000187004			Gm28626			lncRNA
e11ve16_common_1099	chr1	86358782	86360258	+	0.48675	NA	promoter-TSS (ENSMUST00000027438.7)	protein_coding-promoter-TSS (ENSMUST00000027438.7)	-54	ENSMUST00000127284.1	ENSMUSG00000073627	ENSMUST00000127284			C130036L24Rik			lncRNA
e11ve16_common_1100	chr1	86434033	86435630	+	0.63432	NA	Intergenic	Intergenic	8502	ENSMUST00000046004.5	ENSMUSG00000036574	ENSMUST00000046004			Tex44			protein_coding
e11ve16_common_1101	chr1	86441983	86442535	+	1.643	NA	Intergenic	Intergenic	15930	ENSMUST00000046004.5	ENSMUSG00000036574	ENSMUST00000046004			Tex44			protein_coding
e11ve16_common_1102	chr1	86442694	86443076	+	2.40922	NA	Intergenic	Intergenic	16556	ENSMUST00000046004.5	ENSMUSG00000036574	ENSMUST00000046004			Tex44			protein_coding
e11ve16_common_1103	chr1	86449971	86450175	+	0.69029	NA	Intergenic	Intergenic	-23586	ENSMUST00000163337.3	ENSMUSG00000101328	ENSMUST00000163337			Rpl30-ps6			processed_pseudogene
e11ve16_common_1104	chr1	86472084	86472434	+	1.18181	NA	Intergenic	Intergenic	-1400	ENSMUST00000163337.3	ENSMUSG00000101328	ENSMUST00000163337			Rpl30-ps6			processed_pseudogene
e11ve16_common_1105	chr1	86481361	86481598	+	0.18188	NA	Intergenic	Intergenic	7820	ENSMUST00000163337.3	ENSMUSG00000101328	ENSMUST00000163337			Rpl30-ps6			processed_pseudogene
e11ve16_common_1106	chr1	86487166	86488239	+	0.28794	NA	Intergenic	Intergenic	14043	ENSMUST00000163337.3	ENSMUSG00000101328	ENSMUST00000163337			Rpl30-ps6			processed_pseudogene
e11ve16_common_1107	chr1	86503460	86504576	+	1.16649	NA	Intergenic	Intergenic	-22708	ENSMUST00000045897.14	ENSMUSG00000026238	ENSMUST00000186932			Ptma			protein_coding
e11ve16_common_1108	chr1	86509527	86509811	+	0.80144	NA	Intergenic	Intergenic	-17057	ENSMUST00000045897.14	ENSMUSG00000026238	ENSMUST00000186932			Ptma			protein_coding
e11ve16_common_1109	chr1	86525060	86525280	+	1.65126	NA	Intergenic	Intergenic	-1556	ENSMUST00000045897.14	ENSMUSG00000026238	ENSMUST00000186932			Ptma			protein_coding
e11ve16_common_1110	chr1	86526078	86527056	+	1.27671	NA	promoter-TSS (ENSMUST00000045897.14)	protein_coding-promoter-TSS (ENSMUST00000045897.14)	-159	ENSMUST00000045897.14	ENSMUSG00000026238	ENSMUST00000186932			Ptma			protein_coding
e11ve16_common_1111	chr1	86528143	86528435	+	0.21242	NA	intron (ENSMUST00000188699.6, intron 2 of 4)	protein_coding-intron (ENSMUST00000045897.14, intron 1 of 4)	1482	ENSMUST00000188533.1	ENSMUSG00000026238	ENSMUST00000186932			Ptma			protein_coding
e11ve16_common_1112	chr1	86581956	86582909	+	0.89241	NA	promoter-TSS (ENSMUST00000121534.7)	protein_coding-promoter-TSS (ENSMUST00000121534.7)	85	ENSMUST00000150653.1	ENSMUSG00000026239	ENSMUST00000027444			Pde6d			protein_coding
e11ve16_common_1113	chr1	86587130	86587357	+	1.62151	NA	intron (ENSMUST00000027446.10, intron 1 of 6)	protein_coding-intron (ENSMUST00000027446.10, intron 1 of 6)	101	ENSMUST00000122884.1	ENSMUSG00000026240	ENSMUST00000121534			Cops7b			protein_coding
e11ve16_common_1114	chr1	86670567	86671051	+	1.10428	NA	promoter-TSS (ENSMUST00000027449.5)	protein_coding-promoter-TSS (ENSMUST00000027449.5)	-238	ENSMUST00000027449.5	ENSMUSG00000026241	ENSMUST00000027449			Nppc			protein_coding
e11ve16_common_1115	chr1	86703402	86704419	+	0.49851	NA	promoter-TSS (ENSMUST00000065694.7)	protein_coding-promoter-TSS (ENSMUST00000065694.7)	67	ENSMUST00000065694.7	ENSMUSG00000053333	ENSMUST00000065694			Dis3l2			protein_coding
e11ve16_common_1116	chr1	87011215	87012069	+	0.11236	NA	intron (ENSMUST00000190618.6, intron 14 of 20)	protein_coding-intron (ENSMUST00000065694.7, intron 13 of 20)	23372	ENSMUST00000195266.1	ENSMUSG00000102956	ENSMUST00000195266			Gm37017			TEC
e11ve16_common_1117	chr1	87030702	87031132	+	0.83413	NA	intron (ENSMUST00000168237.7, intron 15 of 21)	protein_coding-intron (ENSMUST00000065694.7, intron 14 of 20)	-5806	ENSMUST00000195625.1	ENSMUSG00000103984	ENSMUST00000195625			Gm37447			TEC
e11ve16_common_1118	chr1	87035484	87036376	+	0.43929	NA	promoter-TSS (ENSMUST00000195625.1)	TEC-promoter-TSS (ENSMUST00000195625.1)	-793	ENSMUST00000195625.1	ENSMUSG00000103984	ENSMUST00000195625			Gm37447			TEC
e11ve16_common_1119	chr1	87041052	87041337	+	0.16531	NA	intron (ENSMUST00000168237.7, intron 15 of 21)	protein_coding-intron (ENSMUST00000065694.7, intron 14 of 20)	4471	ENSMUST00000195625.1	ENSMUSG00000103984	ENSMUST00000195625			Gm37447			TEC
e11ve16_common_1120	chr1	87078259	87078522	+	0.07848	NA	Intergenic	Intergenic	-1781	ENSMUST00000186823.1	ENSMUSG00000101625	ENSMUST00000186823			Gm29371			lncRNA
e11ve16_common_1121	chr1	87154360	87154674	+	1.47535	NA	TTS (ENSMUST00000159662.1)	protein_coding-TTS (ENSMUST00000159662.1)	510	ENSMUST00000027463.10	ENSMUSG00000026247	ENSMUST00000162015			Ecel1			protein_coding
e11ve16_common_1122	chr1	87186948	87187265	+	1.33412	NA	intron (ENSMUST00000044533.8, intron 10 of 12)	protein_coding-intron (ENSMUST00000044533.8, intron 10 of 12)	-3501	ENSMUST00000189970.1	ENSMUSG00000026251	ENSMUST00000073252			Chrnd			protein_coding
e11ve16_common_1123	chr1	87213565	87214317	+	0.49439	NA	promoter-TSS (ENSMUST00000050876.13)	protein_coding-promoter-TSS (ENSMUST00000050876.13)	2	ENSMUST00000113230.7	ENSMUSG00000026254	ENSMUST00000113230			Eif4e2			protein_coding
e11ve16_common_1124	chr1	87264209	87264487	+	1.22497	NA	promoter-TSS (ENSMUST00000027472.6)	protein_coding-promoter-TSS (ENSMUST00000027472.6)	-15	ENSMUST00000027472.6	ENSMUSG00000026255	ENSMUST00000150831			Efhd1			protein_coding
e11ve16_common_1125	chr1	87326724	87327907	+	0.86193	NA	exon (ENSMUST00000187038.1, exon 1 of 1)	protein_coding-exon (ENSMUST00000187038.1, exon 1 of 1)	249	ENSMUST00000173173.7	ENSMUSG00000048000	ENSMUST00000187038			Gigyf2			protein_coding
e11ve16_common_1126	chr1	87393914	87395055	+	0.21289	NA	intron (ENSMUST00000113212.3, intron 1 of 2)	protein_coding-intron (ENSMUST00000027475.14, intron 8 of 28)	245	ENSMUST00000113212.3	ENSMUSG00000079436	ENSMUST00000174179			Kcnj13			protein_coding
e11ve16_common_1127	chr1	87509616	87510985	+	1.47272	NA	promoter-TSS (ENSMUST00000027477.14)	protein_coding-promoter-TSS (ENSMUST00000027477.14)	62	ENSMUST00000027477.14	ENSMUSG00000026259	ENSMUST00000068681			Ngef			protein_coding
e11ve16_common_1128	chr1	87755670	87756642	+	0.25389	NA	promoter-TSS (ENSMUST00000113186.7)	protein_coding-promoter-TSS (ENSMUST00000113186.7)	63	ENSMUST00000134603.1	ENSMUSG00000026289	ENSMUST00000133072			Atg16l1			protein_coding
e11ve16_common_1129	chr1	87852932	87854198	+	1.03718	NA	exon (ENSMUST00000187511.1, exon 2 of 2)	lncRNA-exon (ENSMUST00000187511.1, exon 2 of 2)	278	ENSMUST00000027517.13	ENSMUSG00000070738	ENSMUST00000191589			Dgkd			protein_coding
e11ve16_common_1130	chr1	88007955	88008646	+	0.46013	NA	promoter-TSS (ENSMUST00000187871.1)	protein_coding-promoter-TSS (ENSMUST00000187871.1)	-71	ENSMUST00000187871.1	ENSMUSG00000005501	ENSMUST00000186670			Usp40			protein_coding
e11ve16_common_1131	chr1	88144514	88145210	+	0.28767	NA	intron (ENSMUST00000140092.7, intron 2 of 4)	protein_coding-intron (ENSMUST00000014263.5, intron 1 of 4)	-1514	ENSMUST00000119681.1	ENSMUSG00000081602	ENSMUST00000119681			Gm15369			unprocessed_pseudogene
e11ve16_common_1132	chr1	88205443	88205938	+	0.05567	NA	promoter-TSS (ENSMUST00000119972.3)	protein_coding-promoter-TSS (ENSMUST00000119972.3)	92	ENSMUST00000119972.3	ENSMUSG00000081984	ENSMUST00000119972			Dnajb3			protein_coding
e11ve16_common_1133	chr1	88357666	88357884	+	0.39186	NA	intron (ENSMUST00000040210.13, intron 17 of 25)	protein_coding-intron (ENSMUST00000040210.13, intron 17 of 25)	-4845	ENSMUST00000147594.1	ENSMUSG00000085420	ENSMUST00000147594			4930453O03Rik			lncRNA
e11ve16_common_1134	chr1	88428411	88428921	+	0.6086	NA	Intergenic	Intergenic	21260	ENSMUST00000189225.1	ENSMUSG00000026295	ENSMUST00000027518			Spp2			protein_coding
e11ve16_common_1135	chr1	88475595	88476047	+	1.51162	NA	Intergenic	Intergenic	-13213	ENSMUST00000190783.1	ENSMUSG00000099553	ENSMUST00000190783			Gm29538			lncRNA
e11ve16_common_1136	chr1	88502750	88503049	+	2.50217	NA	intron (ENSMUST00000067625.8, intron 2 of 2)	protein_coding-intron (ENSMUST00000067625.8, intron 2 of 2)	7167	ENSMUST00000067625.8	ENSMUSG00000062310	ENSMUST00000067625			Glrp1			protein_coding
e11ve16_common_1137	chr1	88534012	88534600	+	0.84928	NA	Intergenic	Intergenic	-17211	ENSMUST00000189394.1	ENSMUSG00000100798	ENSMUST00000189394			Gm19589			lncRNA
e11ve16_common_1138	chr1	88577385	88577904	+	0.52938	NA	Intergenic	Intergenic	26127	ENSMUST00000189394.1	ENSMUSG00000100798	ENSMUST00000189394			Gm19589			lncRNA
e11ve16_common_1139	chr1	88605621	88606174	+	1.6264	NA	Intergenic	Intergenic	-47188	ENSMUST00000194311.1	ENSMUSG00000104057	ENSMUST00000194311			Gm38130			TEC
e11ve16_common_1140	chr1	88608273	88608801	+	0.25153	NA	Intergenic	Intergenic	-44548	ENSMUST00000194311.1	ENSMUSG00000104057	ENSMUST00000194311			Gm38130			TEC
e11ve16_common_1141	chr1	88638850	88639711	+	1.0441	NA	Intergenic	Intergenic	-13805	ENSMUST00000194311.1	ENSMUSG00000104057	ENSMUST00000194311			Gm38130			TEC
e11ve16_common_1142	chr1	88701460	88702484	+	0.53264	NA	promoter-TSS (ENSMUST00000051236.10)	protein_coding-promoter-TSS (ENSMUST00000051236.10)	-96	ENSMUST00000051236.10	ENSMUSG00000049866	ENSMUST00000051236			Arl4c			protein_coding
e11ve16_common_1143	chr1	88705369	88705959	+	0.1299	NA	Intergenic	Intergenic	-3443	ENSMUST00000159814.1	ENSMUSG00000049866	ENSMUST00000051236			Arl4c			protein_coding
e11ve16_common_1144	chr1	89015681	89015894	+	0.9834	NA	promoter-TSS (ENSMUST00000186180.1)	lncRNA-promoter-TSS (ENSMUST00000186180.1)	-326	ENSMUST00000186180.1	ENSMUSG00000099378	ENSMUST00000186180			1700067G17Rik			lncRNA
e11ve16_common_1145	chr1	89069606	89071174	+	0.41052	NA	promoter-TSS (ENSMUST00000066279.10)	protein_coding-promoter-TSS (ENSMUST00000066279.10)	-25	ENSMUST00000066279.10	ENSMUSG00000036206	ENSMUST00000066279			Sh3bp4			protein_coding
e11ve16_common_1146	chr1	89092762	89093081	+	1.07623	NA	intron (ENSMUST00000066279.10, intron 1 of 5)	protein_coding-intron (ENSMUST00000066279.10, intron 1 of 5)	-4152	ENSMUST00000195426.1	ENSMUSG00000102700	ENSMUST00000195426			Gm38312			TEC
e11ve16_common_1147	chr1	89103891	89104252	+	1.08836	NA	intron (ENSMUST00000066279.10, intron 1 of 5)	protein_coding-intron (ENSMUST00000066279.10, intron 1 of 5)	6998	ENSMUST00000195426.1	ENSMUSG00000102700	ENSMUST00000195426			Gm38312			TEC
e11ve16_common_1148	chr1	89108434	89108834	+	0.29511	NA	intron (ENSMUST00000066279.10, intron 2 of 5)	protein_coding-intron (ENSMUST00000066279.10, intron 2 of 5)	11561	ENSMUST00000195426.1	ENSMUSG00000102700	ENSMUST00000195426			Gm38312			TEC
e11ve16_common_1149	chr1	89165430	89166042	+	0.88062	NA	Intergenic	Intergenic	68663	ENSMUST00000195426.1	ENSMUSG00000102700	ENSMUST00000195426			Gm38312			TEC
e11ve16_common_1150	chr1	89183538	89183980	+	1.47885	NA	Intergenic	Intergenic	73222	ENSMUST00000191231.1	ENSMUSG00000102083	ENSMUST00000191231			Gm5259			processed_pseudogene
e11ve16_common_1151	chr1	89191237	89191884	+	0.28452	NA	Intergenic	Intergenic	65421	ENSMUST00000191231.1	ENSMUSG00000102083	ENSMUST00000191231			Gm5259			processed_pseudogene
e11ve16_common_1152	chr1	89454034	89455118	+	0.49184	NA	promoter-TSS (ENSMUST00000027521.14)	protein_coding-promoter-TSS (ENSMUST00000027521.14)	-230	ENSMUST00000027521.14	ENSMUSG00000055013	ENSMUST00000190096			Agap1			protein_coding
e11ve16_common_1153	chr1	89455534	89455764	+	0.86703	NA	exon (ENSMUST00000185417.1, exon 1 of 1)	protein_coding-exon (ENSMUST00000185417.1, exon 1 of 1)	393	ENSMUST00000185417.1	ENSMUSG00000055013	ENSMUST00000190096			Agap1			protein_coding
e11ve16_common_1154	chr1	89494777	89495290	+	0.46743	NA	intron (ENSMUST00000190096.6, intron 1 of 16)	protein_coding-intron (ENSMUST00000027521.14, intron 1 of 17)	11595	ENSMUST00000192974.1	ENSMUSG00000104114	ENSMUST00000192974			Gm37297			TEC
e11ve16_common_1155	chr1	89516136	89516824	+	0.85966	NA	intron (ENSMUST00000190096.6, intron 1 of 16)	protein_coding-intron (ENSMUST00000027521.14, intron 1 of 17)	33042	ENSMUST00000192974.1	ENSMUSG00000104114	ENSMUST00000192974			Gm37297			TEC
e11ve16_common_1156	chr1	89580059	89581245	+	1.81303	NA	exon (ENSMUST00000074945.7, exon 1 of 18)	protein_coding-exon (ENSMUST00000074945.7, exon 1 of 18)	416	ENSMUST00000074945.7	ENSMUSG00000055013	ENSMUST00000190096			Agap1			protein_coding
e11ve16_common_1157	chr1	89673173	89673790	+	0.58859	NA	intron (ENSMUST00000190096.6, intron 9 of 16)	protein_coding-intron (ENSMUST00000027521.14, intron 9 of 17)	10407	ENSMUST00000187011.1	ENSMUSG00000102009	ENSMUST00000187011			4933400F21Rik			lncRNA
e11ve16_common_1158	chr1	89718238	89719280	+	0.3174	NA	intron (ENSMUST00000190096.6, intron 9 of 16)	protein_coding-intron (ENSMUST00000027521.14, intron 9 of 17)	33957	ENSMUST00000158150.1	ENSMUSG00000088775	ENSMUST00000158150			Gm26037			misc_RNA
e11ve16_common_1159	chr1	89940081	89940632	+	1.22988	NA	Intergenic	Intergenic	-9177	ENSMUST00000036954.8	ENSMUSG00000034486	ENSMUST00000036954			Gbx2			protein_coding
e11ve16_common_1160	chr1	90202459	90202964	+	2.48061	NA	Intergenic	Intergenic	-1269	ENSMUST00000065587.4	ENSMUSG00000044337	ENSMUST00000159654			Ackr3			protein_coding
e11ve16_common_1161	chr1	90203801	90204232	+	0.9533	NA	promoter-TSS (ENSMUST00000065587.4)	protein_coding-promoter-TSS (ENSMUST00000065587.4)	10	ENSMUST00000159654.1	ENSMUSG00000044337	ENSMUST00000159654			Ackr3			protein_coding
e11ve16_common_1162	chr1	90297577	90298342	+	0.46287	NA	Intergenic	Intergenic	17501	ENSMUST00000188640.1	ENSMUSG00000101028	ENSMUST00000188640			Gm28723			lncRNA
e11ve16_common_1163	chr1	90446691	90447149	+	0.63197	NA	Intergenic	Intergenic	7581	ENSMUST00000187630.1	ENSMUSG00000101997	ENSMUST00000187630			Gm28722			lncRNA
e11ve16_common_1164	chr1	90603042	90603733	+	0.58042	NA	promoter-TSS (ENSMUST00000186152.6)	protein_coding-promoter-TSS (ENSMUST00000186152.6)	-89	ENSMUST00000191510.6	ENSMUSG00000034432	ENSMUST00000189107			Cops8			protein_coding
e11ve16_common_1165	chr1	90650875	90651120	+	0.41159	NA	Intergenic	Intergenic	-24164	ENSMUST00000070048.3	ENSMUSG00000056128	ENSMUST00000070048			Gm9991			lncRNA
e11ve16_common_1166	chr1	90927598	90928750	+	1.17737	NA	exon (ENSMUST00000027528.6, exon 3 of 16)	protein_coding-exon (ENSMUST00000027528.6, exon 3 of 16)	495	ENSMUST00000125149.1	ENSMUSG00000026303	ENSMUST00000027528			Mlph			protein_coding
e11ve16_common_1167	chr1	90962602	90963460	+	0.83457	NA	intron (ENSMUST00000128226.7, intron 1 of 4)	protein_coding-intron (ENSMUST00000027529.11, intron 2 of 5)	4586	ENSMUST00000135819.1	ENSMUSG00000026304	ENSMUST00000027529			Rab17			protein_coding
e11ve16_common_1168	chr1	90969249	90969705	+	1.17232	NA	promoter-TSS (ENSMUST00000128226.7)	protein_coding-promoter-TSS (ENSMUST00000128226.7)	71	ENSMUST00000128226.7	ENSMUSG00000026304	ENSMUST00000027529			Rab17			protein_coding
e11ve16_common_1169	chr1	90973171	90973375	+	0.10025	NA	Intergenic	Intergenic	1987	ENSMUST00000187127.1	ENSMUSG00000100791	ENSMUST00000187127			Gm28199			lncRNA
e11ve16_common_1170	chr1	90998449	90999383	+	1.03608	NA	intron (ENSMUST00000189505.6, intron 1 of 12)	protein_coding-intron (ENSMUST00000068116.12, intron 1 of 12)	137	ENSMUST00000068116.12	ENSMUSG00000026305	ENSMUST00000188708			Lrrfip1			protein_coding
e11ve16_common_1171	chr1	91043796	91044460	+	0.49219	NA	intron (ENSMUST00000189505.6, intron 1 of 12)	protein_coding-intron (ENSMUST00000068116.12, intron 1 of 12)	-9316	ENSMUST00000068167.12	ENSMUSG00000026305	ENSMUST00000188708			Lrrfip1			protein_coding
e11ve16_common_1172	chr1	91044792	91045038	+	1.39259	NA	intron (ENSMUST00000189505.6, intron 1 of 12)	protein_coding-intron (ENSMUST00000068116.12, intron 1 of 12)	-8529	ENSMUST00000068167.12	ENSMUSG00000026305	ENSMUST00000188708			Lrrfip1			protein_coding
e11ve16_common_1173	chr1	91052687	91054479	+	0.52996	NA	promoter-TSS (ENSMUST00000097650.9)	protein_coding-promoter-TSS (ENSMUST00000097650.9)	-3	ENSMUST00000189617.2	ENSMUSG00000026305	ENSMUST00000188708			Lrrfip1			protein_coding
e11ve16_common_1174	chr1	91077373	91078390	+	0.15276	NA	intron (ENSMUST00000097650.9, intron 4 of 22)	protein_coding-intron (ENSMUST00000068116.12, intron 2 of 12)	24295	ENSMUST00000189617.2	ENSMUSG00000026305	ENSMUST00000188708			Lrrfip1			protein_coding
e11ve16_common_1175	chr1	91086233	91086913	+	0.89702	NA	intron (ENSMUST00000186762.6, intron 3 of 4)	protein_coding-intron (ENSMUST00000068116.12, intron 2 of 12)	-24641	ENSMUST00000188094.6	ENSMUSG00000026305	ENSMUST00000188708			Lrrfip1			protein_coding
e11ve16_common_1176	chr1	91179269	91179994	+	0.47647	NA	promoter-TSS (ENSMUST00000097648.5)	protein_coding-promoter-TSS (ENSMUST00000097648.5)	-191	ENSMUST00000165855.7	ENSMUSG00000034353	ENSMUST00000097648			Ramp1			protein_coding
e11ve16_common_1177	chr1	91249725	91250898	+	0.56493	NA	promoter-TSS (ENSMUST00000059743.11)	protein_coding-promoter-TSS (ENSMUST00000059743.11)	0	ENSMUST00000059743.11	ENSMUSG00000034343	ENSMUST00000185950			Ube2f			protein_coding
e11ve16_common_1178	chr1	91297782	91298904	+	0.39175	NA	promoter-TSS (ENSMUST00000027532.12)	protein_coding-promoter-TSS (ENSMUST00000027532.12)	5	ENSMUST00000027532.12	ENSMUSG00000026307	ENSMUST00000124832			Scly			protein_coding
e11ve16_common_1179	chr1	91366170	91367101	+	0.24288	NA	exon (ENSMUST00000086861.11, exon 1 of 8)	protein_coding-exon (ENSMUST00000086861.11, exon 1 of 8)	205	ENSMUST00000086861.11	ENSMUSG00000047443	ENSMUST00000190998			Erfe			protein_coding
e11ve16_common_1180	chr1	91398170	91399095	+	0.69688	NA	promoter-TSS (ENSMUST00000187049.6)	protein_coding-promoter-TSS (ENSMUST00000187049.6)	68	ENSMUST00000187049.6	ENSMUSG00000026309	ENSMUST00000027534			Ilkap			protein_coding
e11ve16_common_1181	chr1	91412518	91413574	+	1.92016	NA	exon (ENSMUST00000132188.7, exon 1 of 3)	protein_coding-exon (ENSMUST00000132188.7, exon 1 of 3)	162	ENSMUST00000155752.1	ENSMUSG00000067071	ENSMUST00000155752			Hes6			protein_coding
e11ve16_common_1182	chr1	91414174	91414526	+	1.3556	NA	promoter-TSS (ENSMUST00000150520.1)	protein_coding-promoter-TSS (ENSMUST00000150520.1)	-312	ENSMUST00000150520.1	ENSMUSG00000067071	ENSMUST00000155752			Hes6			protein_coding
e11ve16_common_1183	chr1	91442388	91443119	+	0.17197	NA	intron (ENSMUST00000069620.9, intron 6 of 22)	protein_coding-intron (ENSMUST00000069620.9, intron 6 of 22)	7112	ENSMUST00000185298.1	ENSMUSG00000055866	ENSMUST00000185298			Per2			protein_coding
e11ve16_common_1184	chr1	91448600	91449186	+	0.70539	NA	intron (ENSMUST00000069620.9, intron 3 of 22)	protein_coding-intron (ENSMUST00000069620.9, intron 3 of 22)	972	ENSMUST00000185298.1	ENSMUSG00000055866	ENSMUST00000185298			Per2			protein_coding
e11ve16_common_1185	chr1	91456408	91456608	+	0.85629	NA	intron (ENSMUST00000069620.9, intron 1 of 22)	protein_coding-intron (ENSMUST00000069620.9, intron 1 of 22)	2816	ENSMUST00000069620.9	ENSMUSG00000055866	ENSMUST00000185298			Per2			protein_coding
e11ve16_common_1186	chr1	91458574	91459810	+	0.44659	NA	exon (ENSMUST00000069620.9, exon 1 of 23)	protein_coding-exon (ENSMUST00000069620.9, exon 1 of 23)	132	ENSMUST00000069620.9	ENSMUSG00000055866	ENSMUST00000185298			Per2			protein_coding
e11ve16_common_1187	chr1	91465145	91465810	+	0.34632	NA	Intergenic	Intergenic	4621	ENSMUST00000188403.1	ENSMUSG00000101911	ENSMUST00000188403			Gm28381			processed_pseudogene
e11ve16_common_1188	chr1	91494189	91495067	+	0.63291	NA	promoter-TSS (ENSMUST00000047242.8)	protein_coding-promoter-TSS (ENSMUST00000047242.8)	-19	ENSMUST00000189341.6	ENSMUSG00000034292	ENSMUST00000187588			Traf3ip1			protein_coding
e11ve16_common_1189	chr1	91539888	91540981	+	0.34378	NA	promoter-TSS (ENSMUST00000027538.8)	protein_coding-promoter-TSS (ENSMUST00000027538.8)	-110	ENSMUST00000086843.10	ENSMUSG00000026311	ENSMUST00000185718			Asb1			protein_coding
e11ve16_common_1190	chr1	91770505	91770954	+	0.0606	NA	Intergenic	Intergenic	-30732	ENSMUST00000007949.3	ENSMUSG00000007805	ENSMUST00000007949			Twist2			protein_coding
e11ve16_common_1191	chr1	91844885	91845389	+	0.24175	NA	intron (ENSMUST00000007949.3, intron 1 of 1)	protein_coding-intron (ENSMUST00000007949.3, intron 1 of 1)	22622	ENSMUST00000188329.1	ENSMUSG00000101414	ENSMUST00000188329			Gm29101			lncRNA
e11ve16_common_1192	chr1	91872335	91872881	+	0.66064	NA	Intergenic	Intergenic	-43652	ENSMUST00000193764.1	ENSMUSG00000102745	ENSMUST00000193764			Gm37600			TEC
e11ve16_common_1193	chr1	92030419	92030847	+	0.27467	NA	intron (ENSMUST00000212408.1, intron 3 of 3)	protein_coding-intron (ENSMUST00000008995.14, intron 2 of 25)	-8536	ENSMUST00000192836.1	ENSMUSG00000102565	ENSMUST00000192836			Gm37036			TEC
e11ve16_common_1194	chr1	92051569	92052376	+	1.12926	NA	intron (ENSMUST00000212408.1, intron 3 of 3)	protein_coding-intron (ENSMUST00000008995.14, intron 2 of 25)	-29875	ENSMUST00000192836.1	ENSMUSG00000102565	ENSMUST00000192836			Gm37036			TEC
e11ve16_common_1195	chr1	92180321	92181148	+	1.0177	NA	promoter-TSS (ENSMUST00000097644.8)	protein_coding-promoter-TSS (ENSMUST00000097644.8)	-393	ENSMUST00000097644.8	ENSMUSG00000026313	ENSMUST00000189730			Hdac4			protein_coding
e11ve16_common_1196	chr1	92329776	92330304	+	0.17556	NA	TTS (ENSMUST00000187370.1)	lncRNA-TTS (ENSMUST00000187370.1)	5530	ENSMUST00000187370.1	ENSMUSG00000101265	ENSMUST00000187370			Gm29099			lncRNA
e11ve16_common_1197	chr1	92438182	92438709	+	1.58124	NA	TTS (ENSMUST00000027478.6)	protein_coding-TTS (ENSMUST00000027478.6)	-7913	ENSMUST00000190873.1	ENSMUSG00000101522	ENSMUST00000190873			Gm7837			processed_pseudogene
e11ve16_common_1198	chr1	92473404	92474473	+	0.24929	NA	promoter-TSS (ENSMUST00000027478.6)	protein_coding-promoter-TSS (ENSMUST00000027478.6)	-78	ENSMUST00000027478.6	ENSMUSG00000026260	ENSMUST00000189503			Ndufa10			protein_coding
e11ve16_common_1199	chr1	92641487	92642492	+	0.93261	NA	promoter-TSS (ENSMUST00000097642.3)	protein_coding-promoter-TSS (ENSMUST00000097642.3)	-4	ENSMUST00000097642.3	ENSMUSG00000073616	ENSMUST00000154129			Cops9			protein_coding
e11ve16_common_1200	chr1	92648224	92648886	+	1.54848	NA	promoter-TSS (ENSMUST00000159803.1)	protein_coding-promoter-TSS (ENSMUST00000159803.1)	286	ENSMUST00000053144.3	ENSMUSG00000044055	ENSMUST00000159803			Otos			protein_coding
e11ve16_common_1201	chr1	92774552	92775402	+	1.09917	NA	Intergenic	Intergenic	-14497	ENSMUST00000187845.1	ENSMUSG00000099665	ENSMUST00000187845			Gm29482			lncRNA
e11ve16_common_1202	chr1	92790647	92791729	+	1.3238	NA	Intergenic	Intergenic	-30708	ENSMUST00000187845.1	ENSMUSG00000099665	ENSMUST00000187845			Gm29482			lncRNA
e11ve16_common_1203	chr1	92831218	92832279	+	1.22351	NA	promoter-TSS (ENSMUST00000191373.1)	protein_coding-promoter-TSS (ENSMUST00000191373.1)	103	ENSMUST00000045970.7	ENSMUSG00000034220	ENSMUST00000191373			Gpc1			protein_coding
e11ve16_common_1204	chr1	92906914	92907528	+	0.39034	NA	exon (ENSMUST00000060913.7, exon 1 of 2)	protein_coding-exon (ENSMUST00000060913.7, exon 1 of 2)	240	ENSMUST00000060913.7	ENSMUSG00000047067	ENSMUST00000060913			Dusp28			protein_coding
e11ve16_common_1205	chr1	92910580	92911576	+	0.12961	NA	promoter-TSS (ENSMUST00000178116.7)	protein_coding-promoter-TSS (ENSMUST00000178116.7)	-43	ENSMUST00000178116.7	ENSMUSG00000026269	ENSMUST00000178662			Rnpepl1			protein_coding
e11ve16_common_1206	chr1	92934104	92935338	+	0.27685	NA	promoter-TSS (ENSMUST00000117814.7)	protein_coding-promoter-TSS (ENSMUST00000117814.7)	-45	ENSMUST00000117814.7	ENSMUSG00000026270	ENSMUST00000136598			Capn10			protein_coding
e11ve16_common_1207	chr1	92975996	92976598	+	0.41903	NA	intron (ENSMUST00000064480.6, intron 1 of 1)	protein_coding-intron (ENSMUST00000027489.8, intron 1 of 1)	950	ENSMUST00000064480.6	ENSMUSG00000026271	ENSMUST00000169198			Gpr35			protein_coding
e11ve16_common_1208	chr1	92978768	92979309	+	1.56972	NA	exon (ENSMUST00000169198.2, exon 1 of 2)	protein_coding-exon (ENSMUST00000169198.2, exon 1 of 2)	116	ENSMUST00000169198.2	ENSMUSG00000026271	ENSMUST00000169198			Gpr35			protein_coding
e11ve16_common_1209	chr1	93114944	93115341	+	1.73302	NA	Intergenic	Intergenic	8961	ENSMUST00000191586.1	ENSMUSG00000101378	ENSMUST00000191586			Gm28086			lncRNA
e11ve16_common_1210	chr1	93130170	93130987	+	0.70834	NA	Intergenic	Intergenic	-4662	ENSMUST00000027491.6	ENSMUSG00000026272	ENSMUST00000027491			Agxt			protein_coding
e11ve16_common_1211	chr1	93168441	93168865	+	1.22174	NA	promoter-TSS (ENSMUST00000138595.2)	protein_coding-promoter-TSS (ENSMUST00000138595.2)	-72	ENSMUST00000138595.2	ENSMUSG00000084989	ENSMUST00000138595			Crocc2			protein_coding
e11ve16_common_1212	chr1	93176451	93177089	+	1.5048	NA	intron (ENSMUST00000138595.2, intron 1 of 31)	protein_coding-intron (ENSMUST00000138595.2, intron 1 of 31)	8045	ENSMUST00000138595.2	ENSMUSG00000084989	ENSMUST00000138595			Crocc2			protein_coding
e11ve16_common_1213	chr1	93235500	93236741	+	0.20485	NA	exon (ENSMUST00000062202.13, exon 1 of 31)	protein_coding-exon (ENSMUST00000062202.13, exon 1 of 31)	269	ENSMUST00000172289.7	ENSMUSG00000047793	ENSMUST00000172289			Sned1			protein_coding
e11ve16_common_1214	chr1	93305539	93306134	+	0.78045	NA	promoter-TSS (ENSMUST00000027492.13)	protein_coding-promoter-TSS (ENSMUST00000027492.13)	27	ENSMUST00000112944.7	ENSMUSG00000026273	ENSMUST00000136754			Mterf4			protein_coding
e11ve16_common_1215	chr1	93342664	93343946	+	1.16868	NA	promoter-TSS (ENSMUST00000027493.3)	protein_coding-promoter-TSS (ENSMUST00000027493.3)	160	ENSMUST00000139028.1	ENSMUSG00000026274	ENSMUST00000027493			Pask			protein_coding
e11ve16_common_1216	chr1	93401414	93401771	+	0.23876	NA	promoter-TSS (ENSMUST00000190340.1)	protein_coding-promoter-TSS (ENSMUST00000190340.1)	-269	ENSMUST00000190340.1	ENSMUSG00000034107	ENSMUST00000186641			Ano7			protein_coding
e11ve16_common_1217	chr1	93444641	93446120	+	0.1394	NA	promoter-TSS (ENSMUST00000186787.6)	protein_coding-promoter-TSS (ENSMUST00000186787.6)	52	ENSMUST00000186787.6	ENSMUSG00000034088	ENSMUST00000186164			Hdlbp			protein_coding
e11ve16_common_1218	chr1	93477991	93479619	+	1.30632	NA	promoter-TSS (ENSMUST00000027495.14)	protein_coding-promoter-TSS (ENSMUST00000027495.14)	-4	ENSMUST00000170883.7	ENSMUSG00000034088	ENSMUST00000186164			Hdlbp			protein_coding
e11ve16_common_1219	chr1	93511372	93511836	+	0.99336	NA	promoter-TSS (ENSMUST00000120301.7)	protein_coding-promoter-TSS (ENSMUST00000120301.7)	-475	ENSMUST00000120301.7	ENSMUSG00000034066	ENSMUST00000120301			Farp2			protein_coding
e11ve16_common_1220	chr1	93512092	93512564	+	0.39615	NA	intron (ENSMUST00000122402.2, intron 1 of 12)	protein_coding-intron (ENSMUST00000120301.7, intron 1 of 26)	216	ENSMUST00000122402.2	ENSMUSG00000034066	ENSMUST00000120301			Farp2			protein_coding
e11ve16_common_1221	chr1	93560364	93560571	+	0.29267	NA	intron (ENSMUST00000122402.2, intron 3 of 12)	protein_coding-intron (ENSMUST00000120301.7, intron 3 of 26)	28652	ENSMUST00000194919.1	ENSMUSG00000103854	ENSMUST00000194919			Gm37250			TEC
e11ve16_common_1222	chr1	93634873	93635300	+	0.6176	NA	promoter-TSS (ENSMUST00000190971.1)	lncRNA-promoter-TSS (ENSMUST00000190971.1)	-107	ENSMUST00000190971.1	ENSMUSG00000100927	ENSMUST00000190971			Gm28536			lncRNA
e11ve16_common_1223	chr1	93635860	93636353	+	0.58458	NA	promoter-TSS (ENSMUST00000027498.13)	protein_coding-promoter-TSS (ENSMUST00000027498.13)	-384	ENSMUST00000027498.13	ENSMUSG00000026277	ENSMUST00000027498			Stk25			protein_coding
e11ve16_common_1224	chr1	93667959	93669347	+	0.465	NA	Intergenic	Intergenic	-9994	ENSMUST00000186287.2	ENSMUSG00000026277	ENSMUST00000027498			Stk25			protein_coding
e11ve16_common_1225	chr1	93727204	93727616	+	0.92971	NA	intron (ENSMUST00000112905.3, intron 2 of 5)	protein_coding-intron (ENSMUST00000112905.3, intron 2 of 5)	-3694	ENSMUST00000188846.1	ENSMUSG00000101952	ENSMUST00000188846			Gm10550			lncRNA
e11ve16_common_1226	chr1	93753964	93755408	+	0.58602	NA	promoter-TSS (ENSMUST00000027502.15)	protein_coding-promoter-TSS (ENSMUST00000027502.15)	-36	ENSMUST00000189173.1	ENSMUSG00000026279	ENSMUST00000190116			Thap4			protein_coding
e11ve16_common_1227	chr1	93801700	93802244	+	0.16127	NA	promoter-TSS (ENSMUST00000027503.13)	protein_coding-promoter-TSS (ENSMUST00000027503.13)	-38	ENSMUST00000027503.13	ENSMUSG00000026281	ENSMUST00000112890			Dtymk			protein_coding
e11ve16_common_1228	chr1	93803543	93803789	+	0.50164	NA	promoter-TSS (ENSMUST00000027505.12)	protein_coding-promoter-TSS (ENSMUST00000027505.12)	-299	ENSMUST00000027505.12	ENSMUSG00000026283	ENSMUST00000188402			Ing5			protein_coding
e11ve16_common_1229	chr1	93804236	93804593	+	0.70964	NA	promoter-TSS (ENSMUST00000190476.1)	protein_coding-promoter-TSS (ENSMUST00000190476.1)	69	ENSMUST00000190476.1	ENSMUSG00000026283	ENSMUST00000188402			Ing5			protein_coding
e11ve16_common_1230	chr1	93824764	93826073	+	0.69082	NA	promoter-TSS (ENSMUST00000149397.7)	protein_coding-promoter-TSS (ENSMUST00000149397.7)	144	ENSMUST00000112881.7	ENSMUSG00000073609	ENSMUST00000187321			D2hgdh			protein_coding
e11ve16_common_1231	chr1	93881352	93882137	+	0.5665	NA	Intergenic	Intergenic	19918	ENSMUST00000187896.1	ENSMUSG00000094651	ENSMUST00000094663			Gal3st2			protein_coding
e11ve16_common_1232	chr1	93948501	93949429	+	0.66876	NA	Intergenic	Intergenic	20928	ENSMUST00000177958.1	ENSMUSG00000093805	ENSMUST00000177958			Gal3st2b			protein_coding
e11ve16_common_1233	chr1	94034988	94035915	+	1.20049	NA	Intergenic	Intergenic	14958	ENSMUST00000050890.7	ENSMUSG00000034000	ENSMUST00000190212			Neu4			protein_coding
e11ve16_common_1234	chr1	94079011	94079731	+	0.32707	NA	Intergenic	Intergenic	-26818	ENSMUST00000027507.7	ENSMUSG00000026285	ENSMUST00000027507			Pdcd1			protein_coding
e11ve16_common_1235	chr1	95314185	95314491	+	2.13531	NA	intron (ENSMUST00000186780.1, intron 1 of 1)	protein_coding-intron (ENSMUST00000059975.7, intron 1 of 2)	710	ENSMUST00000186780.1	ENSMUSG00000051185	ENSMUST00000186780			Fam174a			protein_coding
e11ve16_common_1236	chr1	95666610	95666852	+	2.37229	NA	exon (ENSMUST00000186853.1, exon 1 of 1)	protein_coding-exon (ENSMUST00000186853.1, exon 1 of 1)	804	ENSMUST00000189556.1	ENSMUSG00000040710	ENSMUST00000043336			St8sia4			protein_coding
e11ve16_common_1237	chr1	95667039	95668336	+	1.29337	NA	promoter-TSS (ENSMUST00000043336.10)	protein_coding-promoter-TSS (ENSMUST00000043336.10)	-116	ENSMUST00000043336.10	ENSMUSG00000040710	ENSMUST00000043336			St8sia4			protein_coding
e11ve16_common_1238	chr1	96709750	96710238	+	1.14321	NA	Intergenic	Intergenic	-47421	ENSMUST00000189056.1	ENSMUSG00000100589	ENSMUST00000189056			4930533P14Rik			lncRNA
e11ve16_common_1239	chr1	96805072	96805591	+	0.58368	NA	Intergenic	Intergenic	43300	ENSMUST00000104067.1	ENSMUSG00000077255	ENSMUST00000104067			Gm26078			snoRNA
e11ve16_common_1240	chr1	96805699	96805977	+	1.71157	NA	Intergenic	Intergenic	43807	ENSMUST00000104067.1	ENSMUSG00000077255	ENSMUST00000104067			Gm26078			snoRNA
e11ve16_common_1241	chr1	96848542	96849526	+	0.21861	NA	intron (ENSMUST00000071985.5, intron 2 of 12)	protein_coding-intron (ENSMUST00000071985.5, intron 2 of 12)	-22092	ENSMUST00000188631.4	ENSMUSG00000097814	ENSMUST00000181489			Panct2			lncRNA
e11ve16_common_1242	chr1	96883672	96884229	+	1.15402	NA	intron (ENSMUST00000188631.4, intron 3 of 3)	lncRNA-intron (ENSMUST00000188631.4, intron 3 of 3)	11717	ENSMUST00000202118.1	ENSMUSG00000097814	ENSMUST00000181489			Panct2			lncRNA
e11ve16_common_1243	chr1	97018901	97019438	+	0.117	NA	Intergenic	Intergenic	-5512	ENSMUST00000054664.7	ENSMUSG00000044757	ENSMUST00000054664			Gm6430			processed_pseudogene
e11ve16_common_1244	chr1	97038301	97039134	+	0.66893	NA	Intergenic	Intergenic	-13152	ENSMUST00000188810.1	ENSMUSG00000100454	ENSMUST00000188810			Gm28901			lncRNA
e11ve16_common_1245	chr1	97660585	97661458	+	0.92862	NA	exon (ENSMUST00000153115.7, exon 1 of 3)	protein_coding-exon (ENSMUST00000153115.7, exon 1 of 3)	190	ENSMUST00000238965.1	ENSMUSG00000118489	ENSMUST00000238965			AC099860.1			processed_pseudogene
e11ve16_common_1246	chr1	97662088	97662290	+	0.36921	NA	promoter-TSS (ENSMUST00000053033.13)	protein_coding-promoter-TSS (ENSMUST00000053033.13)	-115	ENSMUST00000149927.1	ENSMUSG00000044768	ENSMUST00000053033			D1Ertd622e			protein_coding
e11ve16_common_1247	chr1	97726945	97727325	+	0.78928	NA	intron (ENSMUST00000112845.7, intron 23 of 30)	protein_coding-intron (ENSMUST00000042509.12, intron 23 of 27)	-5828	ENSMUST00000189992.1	ENSMUSG00000040648	ENSMUST00000189992			Ppip5k2			protein_coding
e11ve16_common_1248	chr1	97769197	97770254	+	1.22229	NA	promoter-TSS (ENSMUST00000027571.12)	protein_coding-promoter-TSS (ENSMUST00000027571.12)	-447	ENSMUST00000112844.9	ENSMUSG00000026333	ENSMUST00000112842			Gin1			protein_coding
e11ve16_common_1249	chr1	97770520	97770893	+	1.83711	NA	promoter-TSS (ENSMUST00000042509.12)	protein_coding-promoter-TSS (ENSMUST00000042509.12)	-295	ENSMUST00000042509.12	ENSMUSG00000040648	ENSMUST00000189992			Ppip5k2			protein_coding
e11ve16_common_1250	chr1	97821897	97822541	+	0.21874	NA	TTS (ENSMUST00000160210.1)	protein_coding-TTS (ENSMUST00000160210.1)	3766	ENSMUST00000160210.1	ENSMUSG00000026335	ENSMUST00000097625			Pam			protein_coding
e11ve16_common_1251	chr1	97916326	97916683	+	0.37648	NA	intron (ENSMUST00000097625.9, intron 7 of 25)	protein_coding-intron (ENSMUST00000058762.14, intron 7 of 25)	-19896	ENSMUST00000158544.1	ENSMUSG00000089169	ENSMUST00000158544			Gm25413			misc_RNA
e11ve16_common_1252	chr1	97918310	97918943	+	0.24981	NA	intron (ENSMUST00000097625.9, intron 7 of 25)	protein_coding-intron (ENSMUST00000058762.14, intron 7 of 25)	-17774	ENSMUST00000158544.1	ENSMUSG00000089169	ENSMUST00000158544			Gm25413			misc_RNA
e11ve16_common_1253	chr1	97976529	97977388	+	0.55981	NA	exon (ENSMUST00000058762.14, exon 2 of 26)	protein_coding-exon (ENSMUST00000058762.14, exon 2 of 26)	110	ENSMUST00000159428.7	ENSMUSG00000026335	ENSMUST00000097625			Pam			protein_coding
e11ve16_common_1254	chr1	97996576	97997670	+	0.30783	NA	intron (ENSMUST00000097625.9, intron 1 of 25)	protein_coding-intron (ENSMUST00000058762.14, intron 1 of 25)	-19868	ENSMUST00000161567.7	ENSMUSG00000026335	ENSMUST00000097625			Pam			protein_coding
e11ve16_common_1255	chr1	97997823	97998176	+	1.10366	NA	intron (ENSMUST00000097625.9, intron 1 of 25)	protein_coding-intron (ENSMUST00000058762.14, intron 1 of 25)	-20744	ENSMUST00000161567.7	ENSMUSG00000026335	ENSMUST00000097625			Pam			protein_coding
e11ve16_common_1256	chr1	98068119	98068977	+	0.11299	NA	intron (ENSMUST00000163007.1, intron 2 of 2)	protein_coding-intron (ENSMUST00000058762.14, intron 1 of 25)	-10665	ENSMUST00000186731.1	ENSMUSG00000026335	ENSMUST00000097625			Pam			protein_coding
e11ve16_common_1257	chr1	98094809	98096139	+	0.39145	NA	intron (ENSMUST00000163007.1, intron 1 of 2)	protein_coding-intron (ENSMUST00000163007.1, intron 1 of 2)	147	ENSMUST00000058762.14	ENSMUSG00000026335	ENSMUST00000097625			Pam			protein_coding
e11ve16_common_1258	chr1	98139530	98139843	+	1.05504	NA	intron (ENSMUST00000186473.1, intron 2 of 2)	lncRNA-intron (ENSMUST00000186473.1, intron 2 of 2)	8219	ENSMUST00000186473.1	ENSMUSG00000100182	ENSMUST00000186473			1810006J02Rik			lncRNA
e11ve16_common_1259	chr1	98179050	98179315	+	0.10658	NA	intron (ENSMUST00000189232.1, intron 2 of 3)	lncRNA-intron (ENSMUST00000189232.1, intron 2 of 3)	5534	ENSMUST00000189232.1	ENSMUSG00000100711	ENSMUST00000189232			Gm29461			lncRNA
e11ve16_common_1260	chr1	98350233	98350505	+	0.22922	NA	Intergenic	Intergenic	-70755	ENSMUST00000027575.12	ENSMUSG00000026336	ENSMUST00000027575			Slco6d1			protein_coding
e11ve16_common_1261	chr1	100180116	100180360	+	0.45016	NA	intron (ENSMUST00000188735.1, intron 4 of 16)	protein_coding-intron (ENSMUST00000086738.9, intron 10 of 23)	-72391	ENSMUST00000185484.1	ENSMUSG00000067028	ENSMUST00000086738			Cntnap5b			protein_coding
e11ve16_common_1262	chr1	100231492	100231825	+	1.70187	NA	intron (ENSMUST00000086738.9, intron 11 of 23)	protein_coding-intron (ENSMUST00000086738.9, intron 11 of 23)	-20971	ENSMUST00000185484.1	ENSMUSG00000067028	ENSMUST00000086738			Cntnap5b			protein_coding
e11ve16_common_1263	chr1	101105171	101106786	+	0.15515	NA	Intergenic	Intergenic	-49831	ENSMUST00000187932.1	ENSMUSG00000100684	ENSMUST00000187932			Gm20268			lncRNA
e11ve16_common_1264	chr1	104768401	104770056	+	0.37997	NA	intron (ENSMUST00000062528.8, intron 1 of 11)	protein_coding-intron (ENSMUST00000062528.8, intron 1 of 11)	699	ENSMUST00000062528.8	ENSMUSG00000050840	ENSMUST00000062528			Cdh20			protein_coding
e11ve16_common_1265	chr1	104986039	104986381	+	1.25182	NA	intron (ENSMUST00000062528.8, intron 11 of 11)	protein_coding-intron (ENSMUST00000062528.8, intron 11 of 11)	-73877	ENSMUST00000159213.1	ENSMUSG00000089866	ENSMUST00000159213			Gm15699			lncRNA
e11ve16_common_1266	chr1	104993805	104994774	+	0.49427	NA	exon (ENSMUST00000062528.8, exon 12 of 12)	protein_coding-exon (ENSMUST00000062528.8, exon 12 of 12)	-81956	ENSMUST00000159213.1	ENSMUSG00000089866	ENSMUST00000159213			Gm15699			lncRNA
e11ve16_common_1267	chr1	105092730	105092936	+	0.03102	NA	Intergenic	Intergenic	-23621	ENSMUST00000187882.1	ENSMUSG00000099669	ENSMUST00000187882			Gm29012			lncRNA
e11ve16_common_1268	chr1	105178501	105179954	+	1.11314	NA	Intergenic	Intergenic	62773	ENSMUST00000187882.1	ENSMUSG00000099669	ENSMUST00000187882			Gm29012			lncRNA
e11ve16_common_1269	chr1	105355684	105357140	+	0.63022	NA	promoter-TSS (ENSMUST00000186958.1)	lncRNA-promoter-TSS (ENSMUST00000186958.1)	258	ENSMUST00000058688.6	ENSMUSG00000047496	ENSMUST00000058688			Rnf152			protein_coding
e11ve16_common_1270	chr1	105663049	105664134	+	0.97001	NA	promoter-TSS (ENSMUST00000039173.12)	protein_coding-promoter-TSS (ENSMUST00000039173.12)	52	ENSMUST00000187537.6	ENSMUSG00000056536	ENSMUST00000190811			Pign			protein_coding
e11ve16_common_1271	chr1	105664318	105664640	+	2.54545	NA	promoter-TSS (ENSMUST00000185209.1)	protein_coding-promoter-TSS (ENSMUST00000185209.1)	38	ENSMUST00000191293.6	ENSMUSG00000026319	ENSMUST00000190459			Relch			protein_coding
e11ve16_common_1272	chr1	105780210	105780427	+	1.21944	NA	promoter-TSS (ENSMUST00000027559.7)	protein_coding-promoter-TSS (ENSMUST00000027559.7)	-400	ENSMUST00000027559.7	ENSMUSG00000026321	ENSMUST00000027559			Tnfrsf11a			protein_coding
e11ve16_common_1273	chr1	105780534	105781270	+	0.61561	NA	intron (ENSMUST00000187812.1, intron 1 of 3)	protein_coding-intron (ENSMUST00000027559.7, intron 1 of 9)	152	ENSMUST00000187812.1	ENSMUSG00000026321	ENSMUST00000027559			Tnfrsf11a			protein_coding
e11ve16_common_1274	chr1	105817424	105817626	+	0.72671	NA	intron (ENSMUST00000027559.7, intron 4 of 9)	protein_coding-intron (ENSMUST00000027559.7, intron 4 of 9)	-2345	ENSMUST00000187658.1	ENSMUSG00000026321	ENSMUST00000027559			Tnfrsf11a			protein_coding
e11ve16_common_1275	chr1	105817791	105818044	+	0.99143	NA	intron (ENSMUST00000027559.7, intron 5 of 9)	protein_coding-intron (ENSMUST00000027559.7, intron 5 of 9)	-1953	ENSMUST00000187658.1	ENSMUSG00000026321	ENSMUST00000027559			Tnfrsf11a			protein_coding
e11ve16_common_1276	chr1	105866640	105867450	+	0.72071	NA	Intergenic	Intergenic	23967	ENSMUST00000194221.1	ENSMUSG00000102690	ENSMUST00000194221			Gm37779			TEC
e11ve16_common_1277	chr1	105880659	105881460	+	0.74693	NA	Intergenic	Intergenic	9953	ENSMUST00000194221.1	ENSMUSG00000102690	ENSMUST00000194221			Gm37779			TEC
e11ve16_common_1278	chr1	105989831	105990263	+	0.69032	NA	promoter-TSS (ENSMUST00000118196.7)	protein_coding-promoter-TSS (ENSMUST00000118196.7)	205	ENSMUST00000188519.1	ENSMUSG00000099843	ENSMUST00000185535			Gm7160			lncRNA
e11ve16_common_1279	chr1	105991185	105991763	+	0.5859	NA	exon (ENSMUST00000118196.7, exon 1 of 14)	protein_coding-exon (ENSMUST00000118196.7, exon 1 of 14)	785	ENSMUST00000119166.7	ENSMUSG00000038866	ENSMUST00000118196			Zcchc2			protein_coding
e11ve16_common_1280	chr1	105993719	105993988	+	0.09739	NA	intron (ENSMUST00000118196.7, intron 1 of 13)	protein_coding-intron (ENSMUST00000118196.7, intron 1 of 13)	3164	ENSMUST00000119166.7	ENSMUSG00000038866	ENSMUST00000118196			Zcchc2			protein_coding
e11ve16_common_1281	chr1	106037191	106037453	+	0.13624	NA	Intergenic	Intergenic	25578	ENSMUST00000131830.2	ENSMUSG00000038866	ENSMUST00000118196			Zcchc2			protein_coding
e11ve16_common_1282	chr1	106071220	106071706	+	1.08033	NA	Intergenic	Intergenic	4431	ENSMUST00000193577.1	ENSMUSG00000102501	ENSMUST00000193577			Gm37372			TEC
e11ve16_common_1283	chr1	106171111	106171365	+	0.71071	NA	promoter-TSS (ENSMUST00000061047.6)	protein_coding-promoter-TSS (ENSMUST00000061047.6)	286	ENSMUST00000190105.1	ENSMUSG00000101583	ENSMUST00000190105			Gm20753			lncRNA
e11ve16_common_1284	chr1	106171698	106171949	+	0.75514	NA	promoter-TSS (ENSMUST00000061047.6)	protein_coding-promoter-TSS (ENSMUST00000061047.6)	71	ENSMUST00000061047.6	ENSMUSG00000044340	ENSMUST00000061047			Phlpp1			protein_coding
e11ve16_common_1285	chr1	106172434	106173290	+	0.38085	NA	exon (ENSMUST00000061047.6, exon 1 of 17)	protein_coding-exon (ENSMUST00000061047.6, exon 1 of 17)	1110	ENSMUST00000061047.6	ENSMUSG00000044340	ENSMUST00000061047			Phlpp1			protein_coding
e11ve16_common_1286	chr1	106236882	106237111	+	2.26874	NA	intron (ENSMUST00000061047.6, intron 1 of 16)	protein_coding-intron (ENSMUST00000061047.6, intron 1 of 16)	17682	ENSMUST00000194600.1	ENSMUSG00000103291	ENSMUST00000194600			Gm38235			TEC
e11ve16_common_1287	chr1	106237259	106237492	+	1.65573	NA	intron (ENSMUST00000061047.6, intron 1 of 16)	protein_coding-intron (ENSMUST00000061047.6, intron 1 of 16)	18061	ENSMUST00000194600.1	ENSMUSG00000103291	ENSMUST00000194600			Gm38235			TEC
e11ve16_common_1288	chr1	106240422	106241225	+	0.52187	NA	intron (ENSMUST00000061047.6, intron 1 of 16)	protein_coding-intron (ENSMUST00000061047.6, intron 1 of 16)	21509	ENSMUST00000194600.1	ENSMUSG00000103291	ENSMUST00000194600			Gm38235			TEC
e11ve16_common_1289	chr1	106380882	106381099	+	2.10163	NA	intron (ENSMUST00000061047.6, intron 14 of 16)	protein_coding-intron (ENSMUST00000061047.6, intron 14 of 16)	20997	ENSMUST00000187918.1	ENSMUSG00000100247	ENSMUST00000187918			A530053M12Rik			lncRNA
e11ve16_common_1290	chr1	106395370	106395679	+	0.26794	NA	Intergenic	Intergenic	6463	ENSMUST00000187918.1	ENSMUSG00000100247	ENSMUST00000187918			A530053M12Rik			lncRNA
e11ve16_common_1291	chr1	106425368	106425703	+	0.06078	NA	Intergenic	Intergenic	-14065	ENSMUST00000189471.1	ENSMUSG00000099604	ENSMUST00000189471			Gm6651			processed_pseudogene
e11ve16_common_1292	chr1	106449731	106450143	+	0.86574	NA	Intergenic	Intergenic	10337	ENSMUST00000189471.1	ENSMUSG00000099604	ENSMUST00000189471			Gm6651			processed_pseudogene
e11ve16_common_1293	chr1	106517295	106517694	+	0.01774	NA	Intergenic	Intergenic	-24449	ENSMUST00000144260.7	ENSMUSG00000054006	ENSMUST00000149909			D630008O14Rik			lncRNA
e11ve16_common_1294	chr1	106566285	106566498	+	0.02003	NA	intron (ENSMUST00000112751.1, intron 1 of 1)	protein_coding-intron (ENSMUST00000112751.1, intron 1 of 1)	-19760	ENSMUST00000183743.1	ENSMUSG00000098344	ENSMUST00000183743			Mir3473f			miRNA
e11ve16_common_1295	chr1	106583551	106584059	+	0.85419	NA	intron (ENSMUST00000112751.1, intron 1 of 1)	protein_coding-intron (ENSMUST00000112751.1, intron 1 of 1)	23065	ENSMUST00000192399.1	ENSMUSG00000103348	ENSMUST00000192399			Gm37053			TEC
e11ve16_common_1296	chr1	106591059	106591601	+	1.11471	NA	intron (ENSMUST00000112751.1, intron 1 of 1)	protein_coding-intron (ENSMUST00000112751.1, intron 1 of 1)	15540	ENSMUST00000192399.1	ENSMUSG00000103348	ENSMUST00000192399			Gm37053			TEC
e11ve16_common_1297	chr1	106629530	106631224	+	0.28129	NA	intron (ENSMUST00000112751.1, intron 1 of 1)	protein_coding-intron (ENSMUST00000112751.1, intron 1 of 1)	-23507	ENSMUST00000192399.1	ENSMUSG00000103348	ENSMUST00000192399			Gm37053			TEC
e11ve16_common_1298	chr1	106713632	106714936	+	0.76886	NA	promoter-TSS (ENSMUST00000112751.1)	protein_coding-promoter-TSS (ENSMUST00000112751.1)	-10	ENSMUST00000112751.1	ENSMUSG00000057329	ENSMUST00000189999			Bcl2			protein_coding
e11ve16_common_1299	chr1	106758763	106759402	+	1.60167	NA	exon (ENSMUST00000187617.1, exon 1 of 1)	protein_coding-exon (ENSMUST00000187617.1, exon 1 of 1)	601	ENSMUST00000187617.1	ENSMUSG00000009905	ENSMUST00000187319			Kdsr			protein_coding
e11ve16_common_1300	chr1	106759930	106760352	+	2.2348	NA	promoter-TSS (ENSMUST00000010049.5)	protein_coding-promoter-TSS (ENSMUST00000010049.5)	-414	ENSMUST00000010049.5	ENSMUSG00000009905	ENSMUST00000187319			Kdsr			protein_coding
e11ve16_common_1301	chr1	106795799	106797153	+	1.09398	NA	exon (ENSMUST00000094646.5, exon 1 of 11)	protein_coding-exon (ENSMUST00000094646.5, exon 1 of 11)	101	ENSMUST00000126057.1	ENSMUSG00000009907	ENSMUST00000147705			Vps4b			protein_coding
e11ve16_common_1302	chr1	107014726	107015111	+	0.01353	NA	Intergenic	Intergenic	10407	ENSMUST00000122046.1	ENSMUSG00000084228	ENSMUST00000122046			Gm8080			unprocessed_pseudogene
e11ve16_common_1303	chr1	107481168	107481965	+	0.59278	NA	Intergenic	Intergenic	-29857	ENSMUST00000009356.10	ENSMUSG00000062345	ENSMUST00000143832			Serpinb2			protein_coding
e11ve16_common_1304	chr1	107590487	107590877	+	1.75315	NA	intron (ENSMUST00000000514.10, intron 1 of 6)	protein_coding-intron (ENSMUST00000000514.10, intron 1 of 6)	636	ENSMUST00000151283.1	ENSMUSG00000026315	ENSMUST00000151283			Serpinb8			protein_coding
e11ve16_common_1305	chr1	107607804	107608397	+	0.52392	NA	TTS (ENSMUST00000123086.1)	protein_coding-TTS (ENSMUST00000123086.1)	2220	ENSMUST00000123086.1	ENSMUSG00000026315	ENSMUST00000151283			Serpinb8			protein_coding
e11ve16_common_1306	chr1	107636146	107636380	+	0.07447	NA	Intergenic	Intergenic	30383	ENSMUST00000123086.1	ENSMUSG00000026315	ENSMUST00000151283			Serpinb8			protein_coding
e11ve16_common_1307	chr1	107748422	107749218	+	0.98206	NA	Intergenic	Intergenic	7888	ENSMUST00000179841.1	ENSMUSG00000096241	ENSMUST00000179841			Gm24267			snRNA
e11ve16_common_1308	chr1	107914937	107915914	+	0.24296	NA	Intergenic	Intergenic	-1834	ENSMUST00000189845.6	ENSMUSG00000100457	ENSMUST00000186875			D830032E09Rik			lncRNA
e11ve16_common_1309	chr1	107941690	107942559	+	0.79752	NA	intron (ENSMUST00000186875.6, intron 4 of 4)	lncRNA-intron (ENSMUST00000186875.6, intron 4 of 4)	5415	ENSMUST00000189497.1	ENSMUSG00000100457	ENSMUST00000186875			D830032E09Rik			lncRNA
e11ve16_common_1310	chr1	108094492	108095382	+	0.59309	NA	Intergenic	Intergenic	-131630	ENSMUST00000186072.1	ENSMUSG00000099484	ENSMUST00000186072			Gm28282			processed_pseudogene
e11ve16_common_1311	chr1	108110538	108111803	+	0.51521	NA	Intergenic	Intergenic	-147863	ENSMUST00000186072.1	ENSMUSG00000099484	ENSMUST00000186072			Gm28282			processed_pseudogene
e11ve16_common_1312	chr1	111864106	111864470	+	0.36928	NA	exon (ENSMUST00000035462.6, exon 1 of 2)	protein_coding-exon (ENSMUST00000035462.6, exon 1 of 2)	480	ENSMUST00000186365.1	ENSMUSG00000038702	ENSMUST00000189370			Dsel			protein_coding
e11ve16_common_1313	chr1	111865113	111865331	+	0.70575	NA	promoter-TSS (ENSMUST00000035462.6)	protein_coding-promoter-TSS (ENSMUST00000035462.6)	-304	ENSMUST00000035462.6	ENSMUSG00000038702	ENSMUST00000189370			Dsel			protein_coding
e11ve16_common_1314	chr1	112378284	112379084	+	0.9629	NA	Intergenic	Intergenic	26171	ENSMUST00000185872.1	ENSMUSG00000101054	ENSMUST00000185872			Gm18406			processed_pseudogene
e11ve16_common_1315	chr1	112389040	112389245	+	0.29872	NA	Intergenic	Intergenic	15713	ENSMUST00000185872.1	ENSMUSG00000101054	ENSMUST00000185872			Gm18406			processed_pseudogene
e11ve16_common_1316	chr1	112416899	112417137	+	1.26541	NA	Intergenic	Intergenic	-12163	ENSMUST00000185872.1	ENSMUSG00000101054	ENSMUST00000185872			Gm18406			processed_pseudogene
e11ve16_common_1317	chr1	112451889	112452506	+	0.89784	NA	Intergenic	Intergenic	-15714	ENSMUST00000158066.1	ENSMUSG00000088691	ENSMUST00000158066			Gm22331			snoRNA
e11ve16_common_1318	chr1	112456258	112456641	+	0.1392	NA	Intergenic	Intergenic	-11462	ENSMUST00000158066.1	ENSMUSG00000088691	ENSMUST00000158066			Gm22331			snoRNA
e11ve16_common_1319	chr1	114835961	114836559	+	0.28108	NA	Intergenic	Intergenic	383503	ENSMUST00000185902.1	ENSMUSG00000101687	ENSMUST00000185902			Gm4854			processed_pseudogene
e11ve16_common_1320	chr1	114856126	114856937	+	1.14194	NA	Intergenic	Intergenic	363232	ENSMUST00000185902.1	ENSMUSG00000101687	ENSMUST00000185902			Gm4854			processed_pseudogene
e11ve16_common_1321	chr1	115671099	115671341	+	0.33339	NA	promoter-TSS (ENSMUST00000187634.1)	transcribed_processed_pseudogene-promoter-TSS (ENSMUST00000187634.1)	-631	ENSMUST00000187634.1	ENSMUSG00000100515	ENSMUST00000186137			Gm17916			transcribed_processed_pseudogene
e11ve16_common_1322	chr1	115684278	115684672	+	1.63433	NA	promoter-TSS (ENSMUST00000043725.8)	protein_coding-promoter-TSS (ENSMUST00000043725.8)	144	ENSMUST00000186137.6	ENSMUSG00000100515	ENSMUST00000186137			Gm17916			transcribed_processed_pseudogene
e11ve16_common_1323	chr1	115684782	115685143	+	1.09448	NA	promoter-TSS (ENSMUST00000186137.6)	transcribed_processed_pseudogene-promoter-TSS (ENSMUST00000186137.6)	206	ENSMUST00000043725.8	ENSMUSG00000070695	ENSMUST00000043725			Cntnap5a			protein_coding
e11ve16_common_1324	chr1	115917976	115918960	+	1.01636	NA	intron (ENSMUST00000043725.8, intron 3 of 23)	protein_coding-intron (ENSMUST00000043725.8, intron 3 of 23)	233712	ENSMUST00000043725.8	ENSMUSG00000070695	ENSMUST00000043725			Cntnap5a			protein_coding
e11ve16_common_1325	chr1	116099683	116100324	+	1.57699	NA	intron (ENSMUST00000043725.8, intron 5 of 23)	protein_coding-intron (ENSMUST00000043725.8, intron 5 of 23)	294410	ENSMUST00000175207.1	ENSMUSG00000092948	ENSMUST00000175207			Gm23393			miRNA
e11ve16_common_1326	chr1	116285591	116286309	+	0.1985	NA	intron (ENSMUST00000043725.8, intron 12 of 23)	protein_coding-intron (ENSMUST00000043725.8, intron 12 of 23)	108463	ENSMUST00000175207.1	ENSMUSG00000092948	ENSMUST00000175207			Gm23393			miRNA
e11ve16_common_1327	chr1	116324202	116324995	+	0.80934	NA	intron (ENSMUST00000043725.8, intron 13 of 23)	protein_coding-intron (ENSMUST00000043725.8, intron 13 of 23)	69815	ENSMUST00000175207.1	ENSMUSG00000092948	ENSMUST00000175207			Gm23393			miRNA
e11ve16_common_1328	chr1	118310650	118311842	+	0.48698	NA	promoter-TSS (ENSMUST00000188882.1)	protein_coding-promoter-TSS (ENSMUST00000188882.1)	-10	ENSMUST00000188882.1	ENSMUSG00000026374	ENSMUST00000188512			Tsn			protein_coding
e11ve16_common_1329	chr1	118320931	118322578	+	1.09407	NA	promoter-TSS (ENSMUST00000027626.12)	protein_coding-promoter-TSS (ENSMUST00000027626.12)	-85	ENSMUST00000027626.12	ENSMUSG00000026377	ENSMUST00000027626			Nifk			protein_coding
e11ve16_common_1330	chr1	118388247	118389482	+	0.22521	NA	promoter-TSS (ENSMUST00000049404.12)	protein_coding-promoter-TSS (ENSMUST00000049404.12)	-194	ENSMUST00000049404.12	ENSMUSG00000064302	ENSMUST00000189216			Clasp1			protein_coding
e11ve16_common_1331	chr1	118389700	118390082	+	2.20076	NA	intron (ENSMUST00000049404.12, intron 1 of 39)	protein_coding-intron (ENSMUST00000049404.12, intron 1 of 39)	374	ENSMUST00000189262.6	ENSMUSG00000064302	ENSMUST00000189216			Clasp1			protein_coding
e11ve16_common_1332	chr1	118398094	118399178	+	0.33263	NA	intron (ENSMUST00000049404.12, intron 1 of 39)	protein_coding-intron (ENSMUST00000049404.12, intron 1 of 39)	9119	ENSMUST00000189262.6	ENSMUSG00000064302	ENSMUST00000189216			Clasp1			protein_coding
e11ve16_common_1333	chr1	118458794	118459080	+	0.59143	NA	promoter-TSS (ENSMUST00000203009.2)	protein_coding-promoter-TSS (ENSMUST00000203009.2)	-190	ENSMUST00000204125.1	ENSMUSG00000107722	ENSMUST00000204125			2900060B14Rik			lncRNA
e11ve16_common_1334	chr1	118459607	118459905	+	0.17829	NA	promoter-TSS (ENSMUST00000116892.1)	snRNA-promoter-TSS (ENSMUST00000116892.1)	168	ENSMUST00000203009.2	ENSMUSG00000064302	ENSMUST00000189216			Clasp1			protein_coding
e11ve16_common_1335	chr1	118481014	118482150	+	1.43772	NA	promoter-TSS (ENSMUST00000191823.5)	protein_coding-promoter-TSS (ENSMUST00000191823.5)	-457	ENSMUST00000191823.5	ENSMUSG00000064302	ENSMUST00000189216			Clasp1			protein_coding
e11ve16_common_1336	chr1	118492764	118492976	+	0.3653	NA	intron (ENSMUST00000191823.5, intron 1 of 32)	protein_coding-intron (ENSMUST00000191823.5, intron 1 of 32)	10831	ENSMUST00000191823.5	ENSMUSG00000064302	ENSMUST00000189216			Clasp1			protein_coding
e11ve16_common_1337	chr1	118627540	118628505	+	0.73015	NA	promoter-TSS (ENSMUST00000027629.9)	protein_coding-promoter-TSS (ENSMUST00000027629.9)	76	ENSMUST00000027629.9	ENSMUSG00000026380	ENSMUST00000027629			Tfcp2l1			protein_coding
e11ve16_common_1338	chr1	118660982	118661511	+	0.62195	NA	intron (ENSMUST00000027629.9, intron 7 of 14)	protein_coding-intron (ENSMUST00000027629.9, intron 7 of 14)	-9451	ENSMUST00000185504.1	ENSMUSG00000101624	ENSMUST00000185504			Gm28882			processed_pseudogene
e11ve16_common_1339	chr1	118671883	118672560	+	0.75866	NA	intron (ENSMUST00000027629.9, intron 13 of 14)	protein_coding-intron (ENSMUST00000027629.9, intron 13 of 14)	-9600	ENSMUST00000157738.1	ENSMUSG00000088363	ENSMUST00000157738			Gm23497			snRNA
e11ve16_common_1340	chr1	118913451	118914319	+	0.1955	NA	intron (ENSMUST00000159839.7, intron 2 of 6)	protein_coding-intron (ENSMUST00000062483.14, intron 2 of 13)	-40335	ENSMUST00000183982.1	ENSMUSG00000098273	ENSMUST00000183982			Mir6346			miRNA
e11ve16_common_1341	chr1	118981966	118982454	+	2.15491	NA	intron (ENSMUST00000161301.7, intron 2 of 9)	protein_coding-intron (ENSMUST00000062483.14, intron 2 of 13)	378	ENSMUST00000159678.2	ENSMUSG00000048402	ENSMUST00000162607			Gli2			protein_coding
e11ve16_common_1342	chr1	118982616	118983090	+	1.48501	NA	promoter-TSS (ENSMUST00000159678.2)	protein_coding-promoter-TSS (ENSMUST00000159678.2)	-265	ENSMUST00000159678.2	ENSMUSG00000048402	ENSMUST00000162607			Gli2			protein_coding
e11ve16_common_1343	chr1	119047534	119048193	+	0.23037	NA	intron (ENSMUST00000161301.7, intron 1 of 9)	protein_coding-intron (ENSMUST00000062483.14, intron 1 of 13)	5476	ENSMUST00000160991.7	ENSMUSG00000048402	ENSMUST00000162607			Gli2			protein_coding
e11ve16_common_1344	chr1	119052461	119052715	+	0.99034	NA	intron (ENSMUST00000161301.7, intron 1 of 9)	protein_coding-intron (ENSMUST00000062483.14, intron 1 of 13)	751	ENSMUST00000160991.7	ENSMUSG00000048402	ENSMUST00000162607			Gli2			protein_coding
e11ve16_common_1345	chr1	119053480	119053789	+	1.69907	NA	promoter-TSS (ENSMUST00000062483.14)	protein_coding-promoter-TSS (ENSMUST00000062483.14)	-15	ENSMUST00000062483.14	ENSMUSG00000048402	ENSMUST00000162607			Gli2			protein_coding
e11ve16_common_1346	chr1	119053910	119054231	+	2.68366	NA	promoter-TSS (ENSMUST00000062483.14)	protein_coding-promoter-TSS (ENSMUST00000062483.14)	-451	ENSMUST00000062483.14	ENSMUSG00000048402	ENSMUST00000162607			Gli2			protein_coding
e11ve16_common_1347	chr1	119083640	119083885	+	2.2386	NA	Intergenic	Intergenic	25293	ENSMUST00000181458.1	ENSMUSG00000097408	ENSMUST00000181458			Gm26831			lncRNA
e11ve16_common_1348	chr1	119189478	119189985	+	1.59335	NA	Intergenic	Intergenic	32145	ENSMUST00000181691.1	ENSMUSG00000096939	ENSMUST00000181691			Gm8321			processed_pseudogene
e11ve16_common_1349	chr1	119278723	119279431	+	0.38002	NA	Intergenic	Intergenic	-36324	ENSMUST00000186012.1	ENSMUSG00000100767	ENSMUST00000186012			Gm3508			processed_pseudogene
e11ve16_common_1350	chr1	119289919	119290776	+	1.50918	NA	Intergenic	Intergenic	36486	ENSMUST00000189894.1	ENSMUSG00000099860	ENSMUST00000189894			Gm29456			lncRNA
e11ve16_common_1351	chr1	119328740	119329741	+	0.55484	NA	promoter-TSS (ENSMUST00000186504.1)	lncRNA-promoter-TSS (ENSMUST00000186504.1)	-2	ENSMUST00000186504.1	ENSMUSG00000101179	ENSMUST00000186697			Gm29455			lncRNA
e11ve16_common_1352	chr1	119420773	119422404	+	0.51013	NA	exon (ENSMUST00000038765.5, exon 1 of 2)	protein_coding-exon (ENSMUST00000038765.5, exon 1 of 2)	660	ENSMUST00000038765.5	ENSMUSG00000037035	ENSMUST00000038765			Inhbb			protein_coding
e11ve16_common_1353	chr1	119458153	119458386	+	2.08382	NA	Intergenic	Intergenic	19810	ENSMUST00000142945.2	ENSMUSG00000004451	ENSMUST00000004565			Ralb			protein_coding
e11ve16_common_1354	chr1	119504209	119504603	+	1.67484	NA	intron (ENSMUST00000004565.14, intron 1 of 4)	protein_coding-intron (ENSMUST00000004565.14, intron 1 of 4)	388	ENSMUST00000004565.14	ENSMUSG00000004451	ENSMUST00000004565			Ralb			protein_coding
e11ve16_common_1355	chr1	119504980	119505378	+	0.20186	NA	promoter-TSS (ENSMUST00000004565.14)	protein_coding-promoter-TSS (ENSMUST00000004565.14)	-385	ENSMUST00000156213.1	ENSMUSG00000004451	ENSMUST00000004565			Ralb			protein_coding
e11ve16_common_1356	chr1	119525708	119526557	+	0.50655	NA	promoter-TSS (ENSMUST00000183607.1)	protein_coding-promoter-TSS (ENSMUST00000183607.1)	-28	ENSMUST00000183952.1	ENSMUSG00000098923	ENSMUST00000183952			Tmem185b			protein_coding
e11ve16_common_1357	chr1	119541088	119542032	+	0.32727	NA	Intergenic	Intergenic	-5395	ENSMUST00000188909.1	ENSMUSG00000101731	ENSMUST00000188909			3830432H09Rik			lncRNA
e11ve16_common_1358	chr1	119648374	119649938	+	0.30501	NA	promoter-TSS (ENSMUST00000027632.13)	protein_coding-promoter-TSS (ENSMUST00000027632.13)	-156	ENSMUST00000191046.6	ENSMUSG00000026383	ENSMUST00000191162			Epb41l5			protein_coding
e11ve16_common_1359	chr1	119836648	119837953	+	0.41403	NA	promoter-TSS (ENSMUST00000163435.7)	protein_coding-promoter-TSS (ENSMUST00000163435.7)	47	ENSMUST00000163435.7	ENSMUSG00000026384	ENSMUST00000166422			Ptpn4			protein_coding
e11ve16_common_1360	chr1	119907145	119907434	+	0.09187	NA	TTS (ENSMUST00000037906.5)	protein_coding-TTS (ENSMUST00000037906.5)	4159	ENSMUST00000187956.1	ENSMUSG00000101224	ENSMUST00000187956			Gm28209			lncRNA
e11ve16_common_1361	chr1	119912848	119913671	+	1.17686	NA	promoter-TSS (ENSMUST00000037906.5)	protein_coding-promoter-TSS (ENSMUST00000037906.5)	-51	ENSMUST00000037906.5	ENSMUSG00000036975	ENSMUST00000037906			Tmem177			protein_coding
e11ve16_common_1362	chr1	119965816	119966355	+	0.88089	NA	intron (ENSMUST00000174458.1, intron 6 of 6)	protein_coding-intron (ENSMUST00000037840.11, intron 5 of 22)	-20710	ENSMUST00000174509.1	ENSMUSG00000092245	ENSMUST00000174509			Gm17973			processed_pseudogene
e11ve16_common_1363	chr1	119996836	119997671	+	0.46296	NA	promoter-TSS (ENSMUST00000174370.7)	protein_coding-promoter-TSS (ENSMUST00000174370.7)	-19	ENSMUST00000174458.1	ENSMUSG00000036962	ENSMUST00000174370			Cfap221			protein_coding
e11ve16_common_1364	chr1	120007522	120007732	+	1.78769	NA	intron (ENSMUST00000189037.1, intron 1 of 12)	protein_coding-intron (ENSMUST00000072886.10, intron 1 of 13)	593	ENSMUST00000189037.1	ENSMUSG00000026387	ENSMUST00000189037			Sctr			protein_coding
e11ve16_common_1365	chr1	120013090	120013356	+	0.63911	NA	intron (ENSMUST00000189037.1, intron 1 of 12)	protein_coding-intron (ENSMUST00000072886.10, intron 1 of 13)	6189	ENSMUST00000189037.1	ENSMUSG00000026387	ENSMUST00000189037			Sctr			protein_coding
e11ve16_common_1366	chr1	120024701	120025325	+	0.25054	NA	intron (ENSMUST00000072886.10, intron 3 of 13)	protein_coding-intron (ENSMUST00000072886.10, intron 3 of 13)	17979	ENSMUST00000189037.1	ENSMUSG00000026387	ENSMUST00000189037			Sctr			protein_coding
e11ve16_common_1367	chr1	120032934	120033380	+	0.94116	NA	intron (ENSMUST00000189037.1, intron 3 of 12)	protein_coding-intron (ENSMUST00000072886.10, intron 4 of 13)	26123	ENSMUST00000189037.1	ENSMUSG00000026387	ENSMUST00000189037			Sctr			protein_coding
e11ve16_common_1368	chr1	120073061	120073998	+	0.58906	NA	intron (ENSMUST00000056089.7, intron 1 of 1)	protein_coding-intron (ENSMUST00000056089.7, intron 1 of 1)	545	ENSMUST00000056089.7	ENSMUSG00000050777	ENSMUST00000056089			Tmem37			protein_coding
e11ve16_common_1369	chr1	120083878	120084181	+	0.04536	NA	Intergenic	Intergenic	-9955	ENSMUST00000056089.7	ENSMUSG00000050777	ENSMUST00000056089			Tmem37			protein_coding
e11ve16_common_1370	chr1	120093483	120093699	+	0.76703	NA	Intergenic	Intergenic	-19517	ENSMUST00000056089.7	ENSMUSG00000050777	ENSMUST00000056089			Tmem37			protein_coding
e11ve16_common_1371	chr1	120120153	120121707	+	0.57934	NA	promoter-TSS (ENSMUST00000027637.12)	protein_coding-promoter-TSS (ENSMUST00000027637.12)	7	ENSMUST00000151708.2	ENSMUSG00000026385	ENSMUST00000132118			Dbi			protein_coding
e11ve16_common_1372	chr1	120146921	120147248	+	0.16138	NA	intron (ENSMUST00000027637.12, intron 1 of 4)	protein_coding-intron (ENSMUST00000027637.12, intron 1 of 4)	-3515	ENSMUST00000187809.1	ENSMUSG00000026388	ENSMUST00000027637			3110009E18Rik			protein_coding
e11ve16_common_1373	chr1	120171489	120172046	+	0.93143	NA	intron (ENSMUST00000112644.8, intron 5 of 5)	protein_coding-intron (ENSMUST00000027637.12, intron 4 of 4)	11287	ENSMUST00000128578.1	ENSMUSG00000026388	ENSMUST00000027637			3110009E18Rik			protein_coding
e11ve16_common_1374	chr1	120197095	120197313	+	2.35032	NA	intron (ENSMUST00000140490.7, intron 4 of 4)	protein_coding-intron (ENSMUST00000140490.7, intron 4 of 4)	36724	ENSMUST00000128578.1	ENSMUSG00000026388	ENSMUST00000027637			3110009E18Rik			protein_coding
e11ve16_common_1375	chr1	120264612	120264997	+	1.83604	NA	intron (ENSMUST00000112643.1, intron 2 of 5)	protein_coding-intron (ENSMUST00000112639.7, intron 1 of 4)	451	ENSMUST00000140490.7	ENSMUSG00000026389	ENSMUST00000112641			Steap3			protein_coding
e11ve16_common_1376	chr1	120265319	120265747	+	0.20919	NA	promoter-TSS (ENSMUST00000112640.7)	protein_coding-promoter-TSS (ENSMUST00000112640.7)	-249	ENSMUST00000112640.7	ENSMUSG00000026389	ENSMUST00000112641			Steap3			protein_coding
e11ve16_common_1377	chr1	120340593	120341391	+	0.73565	NA	exon (ENSMUST00000037286.9, exon 1 of 2)	protein_coding-exon (ENSMUST00000037286.9, exon 1 of 2)	410	ENSMUST00000037286.9	ENSMUSG00000036907	ENSMUST00000037286			C1ql2			protein_coding
e11ve16_common_1378	chr1	120341863	120342832	+	0.64936	NA	intron (ENSMUST00000037286.9, intron 1 of 1)	protein_coding-intron (ENSMUST00000037286.9, intron 1 of 1)	1765	ENSMUST00000037286.9	ENSMUSG00000036907	ENSMUST00000037286			C1ql2			protein_coding
e11ve16_common_1379	chr1	120357676	120358201	+	0.1685	NA	Intergenic	Intergenic	17356	ENSMUST00000037286.9	ENSMUSG00000036907	ENSMUST00000037286			C1ql2			protein_coding
e11ve16_common_1380	chr1	120469048	120469292	+	0.06727	NA	Intergenic	Intergenic	33365	ENSMUST00000186237.1	ENSMUSG00000101275	ENSMUST00000186237			1700012E03Rik			lncRNA
e11ve16_common_1381	chr1	120529762	120530017	+	0.12821	NA	Intergenic	Intergenic	-24865	ENSMUST00000027639.7	ENSMUSG00000026390	ENSMUST00000027639			Marco			protein_coding
e11ve16_common_1382	chr1	120602903	120603240	+	2.62763	NA	exon (ENSMUST00000079721.8, exon 1 of 2)	protein_coding-exon (ENSMUST00000079721.8, exon 1 of 2)	653	ENSMUST00000079721.8	ENSMUSG00000058665	ENSMUST00000079721			En1			protein_coding
e11ve16_common_1383	chr1	120814592	120814973	+	1.72713	NA	Intergenic	Intergenic	-1718	ENSMUST00000189213.1	ENSMUSG00000101922	ENSMUST00000189213			Gm29345			lncRNA
e11ve16_common_1384	chr1	121327158	121327559	+	1.79918	NA	promoter-TSS (ENSMUST00000194699.1)	TEC-promoter-TSS (ENSMUST00000194699.1)	320	ENSMUST00000159085.7	ENSMUSG00000003721	ENSMUST00000162019			Insig2			protein_coding
e11ve16_common_1385	chr1	121343706	121344498	+	0.33218	NA	Intergenic	Intergenic	-11513	ENSMUST00000071064.12	ENSMUSG00000003721	ENSMUST00000162019			Insig2			protein_coding
e11ve16_common_1386	chr1	121430772	121431968	+	0.90888	NA	intron (ENSMUST00000156459.7, intron 1 of 5)	protein_coding-intron (ENSMUST00000036025.15, intron 1 of 23)	260	ENSMUST00000112621.1	ENSMUSG00000026339	ENSMUST00000128924			Ccdc93			protein_coding
e11ve16_common_1387	chr1	121567346	121568327	+	1.05521	NA	promoter-TSS (ENSMUST00000131471.1)	protein_coding-promoter-TSS (ENSMUST00000131471.1)	-114	ENSMUST00000131471.1	ENSMUSG00000001674	ENSMUST00000131471			Ddx18			protein_coding
e11ve16_common_1388	chr1	122109542	122110023	+	1.17922	NA	Intergenic	Intergenic	-80439	ENSMUST00000185647.1	ENSMUSG00000100913	ENSMUST00000185647			Gm8392			processed_pseudogene
e11ve16_common_1389	chr1	122940401	122940782	+	0.54755	NA	Intergenic	Intergenic	74549	ENSMUST00000193865.1	ENSMUSG00000104180	ENSMUST00000193865			Gm37970			TEC
e11ve16_common_1390	chr1	123179317	123180090	+	1.80339	NA	Intergenic	Intergenic	-25446	ENSMUST00000188837.1	ENSMUSG00000100405	ENSMUST00000188837			Gm28911			processed_pseudogene
e11ve16_common_1391	chr1	123193561	123194388	+	0.61033	NA	Intergenic	Intergenic	-11175	ENSMUST00000188837.1	ENSMUSG00000100405	ENSMUST00000188837			Gm28911			processed_pseudogene
e11ve16_common_1392	chr1	125223133	125224016	+	0.33183	NA	Intergenic	Intergenic	-26119	ENSMUST00000187796.1	ENSMUSG00000099574	ENSMUST00000187796			1700121L03Rik			lncRNA
e11ve16_common_1393	chr1	125370944	125371455	+	1.00491	NA	Intergenic	Intergenic	26413	ENSMUST00000186008.6	ENSMUSG00000026341	ENSMUST00000027579			Actr3			protein_coding
e11ve16_common_1394	chr1	125431518	125431779	+	0.02425	NA	intron (ENSMUST00000191578.6, intron 1 of 10)	protein_coding-intron (ENSMUST00000027579.16, intron 2 of 12)	2998	ENSMUST00000191544.6	ENSMUSG00000026341	ENSMUST00000027579			Actr3			protein_coding
e11ve16_common_1395	chr1	125434892	125436154	+	0.62142	NA	promoter-TSS (ENSMUST00000178474.7)	protein_coding-promoter-TSS (ENSMUST00000178474.7)	24	ENSMUST00000178474.7	ENSMUSG00000026341	ENSMUST00000027579			Actr3			protein_coding
e11ve16_common_1396	chr1	125482629	125483413	+	0.94216	NA	Intergenic	Intergenic	38454	ENSMUST00000186830.1	ENSMUSG00000102063	ENSMUST00000186830			Gm28706			lncRNA
e11ve16_common_1397	chr1	125489299	125489600	+	0.59496	NA	Intergenic	Intergenic	44882	ENSMUST00000186830.1	ENSMUSG00000102063	ENSMUST00000186830			Gm28706			lncRNA
e11ve16_common_1398	chr1	125533346	125533935	+	1.39046	NA	Intergenic	Intergenic	-26955	ENSMUST00000190037.6	ENSMUSG00000026342	ENSMUST00000190037			Slc35f5			protein_coding
e11ve16_common_1399	chr1	125549845	125550984	+	1.05367	NA	Intergenic	Intergenic	-10181	ENSMUST00000190037.6	ENSMUSG00000026342	ENSMUST00000190037			Slc35f5			protein_coding
e11ve16_common_1400	chr1	125560242	125561456	+	0.78636	NA	promoter-TSS (ENSMUST00000027580.10)	protein_coding-promoter-TSS (ENSMUST00000027580.10)	-167	ENSMUST00000027580.10	ENSMUSG00000026342	ENSMUST00000190037			Slc35f5			protein_coding
e11ve16_common_1401	chr1	125676384	125677535	+	0.15643	NA	promoter-TSS (ENSMUST00000027581.6)	protein_coding-promoter-TSS (ENSMUST00000027581.6)	-36	ENSMUST00000027581.6	ENSMUSG00000026343	ENSMUST00000027581			Gpr39			protein_coding
e11ve16_common_1402	chr1	125687534	125687887	+	0.72476	NA	intron (ENSMUST00000027581.6, intron 1 of 1)	protein_coding-intron (ENSMUST00000027581.6, intron 1 of 1)	10715	ENSMUST00000027581.6	ENSMUSG00000026343	ENSMUST00000027581			Gpr39			protein_coding
e11ve16_common_1403	chr1	125911948	125912951	+	1.10436	NA	promoter-TSS (ENSMUST00000159417.1)	protein_coding-promoter-TSS (ENSMUST00000159417.1)	-235	ENSMUST00000159417.1	ENSMUSG00000026344	ENSMUST00000159529			Lypd1			protein_coding
e11ve16_common_1404	chr1	126159312	126159889	+	0.17444	NA	intron (ENSMUST00000094609.9, intron 7 of 12)	protein_coding-intron (ENSMUST00000057846.14, intron 4 of 12)	-88139	ENSMUST00000194647.1	ENSMUSG00000102723	ENSMUST00000194647			Gm37936			TEC
e11ve16_common_1405	chr1	126351002	126351279	+	1.15872	NA	intron (ENSMUST00000160693.1, intron 5 of 5)	protein_coding-intron (ENSMUST00000057846.14, intron 2 of 12)	-26466	ENSMUST00000192213.1	ENSMUSG00000103824	ENSMUST00000192213			Gm38177			TEC
e11ve16_common_1406	chr1	126492945	126493155	+	1.86885	NA	promoter-TSS (ENSMUST00000161954.7)	protein_coding-promoter-TSS (ENSMUST00000161954.7)	-123	ENSMUST00000161954.7	ENSMUSG00000049690	ENSMUST00000094609			Nckap5			protein_coding
e11ve16_common_1407	chr1	126513867	126514249	+	0.46027	NA	intron (ENSMUST00000162646.7, intron 3 of 6)	protein_coding-intron (ENSMUST00000094609.9, intron 3 of 12)	-21131	ENSMUST00000161954.7	ENSMUSG00000049690	ENSMUST00000094609			Nckap5			protein_coding
e11ve16_common_1408	chr1	126604031	126605401	+	0.35005	NA	intron (ENSMUST00000162647.1, intron 2 of 2)	protein_coding-intron (ENSMUST00000094609.9, intron 2 of 12)	-111789	ENSMUST00000161954.7	ENSMUSG00000049690	ENSMUST00000094609			Nckap5			protein_coding
e11ve16_common_1409	chr1	126617259	126618009	+	0.11893	NA	intron (ENSMUST00000162647.1, intron 2 of 2)	protein_coding-intron (ENSMUST00000094609.9, intron 2 of 12)	120556	ENSMUST00000162664.7	ENSMUSG00000049690	ENSMUST00000094609			Nckap5			protein_coding
e11ve16_common_1410	chr1	126621983	126622854	+	0.43119	NA	intron (ENSMUST00000162647.1, intron 2 of 2)	protein_coding-intron (ENSMUST00000094609.9, intron 2 of 12)	115772	ENSMUST00000162664.7	ENSMUSG00000049690	ENSMUST00000094609			Nckap5			protein_coding
e11ve16_common_1411	chr1	126675003	126675547	+	0.47574	NA	intron (ENSMUST00000162647.1, intron 2 of 2)	protein_coding-intron (ENSMUST00000094609.9, intron 2 of 12)	62915	ENSMUST00000162664.7	ENSMUSG00000049690	ENSMUST00000094609			Nckap5			protein_coding
e11ve16_common_1412	chr1	126829873	126830888	+	0.40633	NA	exon (ENSMUST00000094609.9, exon 1 of 13)	protein_coding-exon (ENSMUST00000094609.9, exon 1 of 13)	101	ENSMUST00000162647.1	ENSMUSG00000049690	ENSMUST00000094609			Nckap5			protein_coding
e11ve16_common_1413	chr1	126832841	126833543	+	1.79802	NA	Intergenic	Intergenic	-2393	ENSMUST00000162646.7	ENSMUSG00000049690	ENSMUST00000094609			Nckap5			protein_coding
e11ve16_common_1414	chr1	126925295	126925771	+	0.05991	NA	Intergenic	Intergenic	-48918	ENSMUST00000188266.1	ENSMUSG00000101600	ENSMUST00000186724			4930599A14Rik			lncRNA
e11ve16_common_1415	chr1	127103513	127104147	+	0.52492	NA	Intergenic	Intergenic	-53134	ENSMUST00000185860.1	ENSMUSG00000101385	ENSMUST00000185860			Gm5261			processed_pseudogene
e11ve16_common_1416	chr1	127204845	127205347	+	1.19029	NA	promoter-TSS (ENSMUST00000038361.10)	protein_coding-promoter-TSS (ENSMUST00000038361.10)	68	ENSMUST00000190921.1	ENSMUSG00000036155	ENSMUST00000171405			Mgat5			protein_coding
e11ve16_common_1417	chr1	127217234	127217700	+	0.02678	NA	intron (ENSMUST00000189427.6, intron 1 of 7)	protein_coding-intron (ENSMUST00000038361.10, intron 1 of 17)	12439	ENSMUST00000190921.1	ENSMUSG00000036155	ENSMUST00000171405			Mgat5			protein_coding
e11ve16_common_1418	chr1	127425228	127425724	+	1.08429	NA	intron (ENSMUST00000171405.1, intron 10 of 15)	protein_coding-intron (ENSMUST00000038361.10, intron 12 of 17)	18700	ENSMUST00000195573.1	ENSMUSG00000103390	ENSMUST00000195573			Gm38301			TEC
e11ve16_common_1419	chr1	127568540	127569152	+	0.48851	NA	intron (ENSMUST00000160616.7, intron 2 of 8)	protein_coding-intron (ENSMUST00000027585.13, intron 2 of 8)	-31416	ENSMUST00000162406.1	ENSMUSG00000026347	ENSMUST00000162406			Tmem163			protein_coding
e11ve16_common_1420	chr1	127755600	127756620	+	0.45587	NA	promoter-TSS (ENSMUST00000186537.1)	protein_coding-promoter-TSS (ENSMUST00000186537.1)	-647	ENSMUST00000186537.1	ENSMUSG00000026348	ENSMUST00000038006			Acmsd			protein_coding
e11ve16_common_1421	chr1	127773572	127774840	+	0.34672	NA	promoter-TSS (ENSMUST00000027587.14)	protein_coding-promoter-TSS (ENSMUST00000027587.14)	42	ENSMUST00000027587.14	ENSMUSG00000026349	ENSMUST00000149760			Ccnt2			protein_coding
e11ve16_common_1422	chr1	127868477	127869255	+	0.2254	NA	promoter-TSS (ENSMUST00000037649.5)	protein_coding-promoter-TSS (ENSMUST00000037649.5)	54	ENSMUST00000212506.1	ENSMUSG00000036104	ENSMUST00000131884			Rab3gap1			protein_coding
e11ve16_common_1423	chr1	128013960	128014541	+	0.95506	NA	intron (ENSMUST00000127393.7, intron 2 of 2)	protein_coding-intron (ENSMUST00000086614.11, intron 8 of 20)	4443	ENSMUST00000131732.1	ENSMUSG00000036086	ENSMUST00000131732			Zranb3			protein_coding
e11ve16_common_1424	chr1	128102421	128103108	+	1.10879	NA	promoter-TSS (ENSMUST00000036288.10)	protein_coding-promoter-TSS (ENSMUST00000036288.10)	237	ENSMUST00000112538.3	ENSMUSG00000036086	ENSMUST00000131732			Zranb3			protein_coding
e11ve16_common_1425	chr1	128103336	128103878	+	0.26352	NA	promoter-TSS (ENSMUST00000097597.6)	protein_coding-promoter-TSS (ENSMUST00000097597.6)	276	ENSMUST00000185389.1	ENSMUSG00000056211	ENSMUST00000185471			R3hdm1			protein_coding
e11ve16_common_1426	chr1	128243776	128245008	+	0.91088	NA	exon (ENSMUST00000027592.5, exon 1 of 13)	protein_coding-exon (ENSMUST00000027592.5, exon 1 of 13)	230	ENSMUST00000027592.5	ENSMUSG00000026353	ENSMUST00000190736			Ubxn4			protein_coding
e11ve16_common_1427	chr1	128358906	128360034	+	0.84989	NA	exon (ENSMUST00000027601.10, exon 1 of 17)	protein_coding-exon (ENSMUST00000027601.10, exon 1 of 17)	177	ENSMUST00000190495.1	ENSMUSG00000026355	ENSMUST00000188755			Mcm6			protein_coding
e11ve16_common_1428	chr1	128399221	128399476	+	0.08561	NA	intron (ENSMUST00000027602.14, intron 4 of 15)	protein_coding-intron (ENSMUST00000027602.14, intron 4 of 15)	18011	ENSMUST00000027602.14	ENSMUSG00000026356	ENSMUST00000064309			Dars			protein_coding
e11ve16_common_1429	chr1	128416633	128417670	+	0.91094	NA	intron (ENSMUST00000064309.8, intron 1 of 3)	protein_coding-intron (ENSMUST00000027602.14, intron 1 of 15)	208	ENSMUST00000027602.14	ENSMUSG00000026356	ENSMUST00000064309			Dars			protein_coding
e11ve16_common_1430	chr1	128456765	128457519	+	0.15527	NA	Intergenic	Intergenic	-32898	ENSMUST00000157571.1	ENSMUSG00000088196	ENSMUST00000157571			Gm23902			snoRNA
e11ve16_common_1431	chr1	128472687	128473056	+	0.68439	NA	Intergenic	Intergenic	-17169	ENSMUST00000157571.1	ENSMUSG00000088196	ENSMUST00000157571			Gm23902			snoRNA
e11ve16_common_1432	chr1	128498184	128498788	+	0.1112	NA	Intergenic	Intergenic	-4054	ENSMUST00000188996.1	ENSMUSG00000100152	ENSMUST00000188996			Gm29598			processed_pseudogene
e11ve16_common_1433	chr1	128551880	128552423	+	0.29124	NA	Intergenic	Intergenic	-30691	ENSMUST00000187672.1	ENSMUSG00000100078	ENSMUST00000187672			Gm6170			processed_pseudogene
e11ve16_common_1434	chr1	128592384	128593380	+	1.07253	NA	promoter-TSS (ENSMUST00000052172.6)	protein_coding-promoter-TSS (ENSMUST00000052172.6)	-589	ENSMUST00000142893.1	ENSMUSG00000045382	ENSMUST00000052172			Cxcr4			protein_coding
e11ve16_common_1435	chr1	128622948	128623734	+	0.37969	NA	Intergenic	Intergenic	-31048	ENSMUST00000142893.1	ENSMUSG00000045382	ENSMUST00000052172			Cxcr4			protein_coding
e11ve16_common_1436	chr1	128649414	128649975	+	0.59087	NA	Intergenic	Intergenic	-57401	ENSMUST00000142893.1	ENSMUSG00000045382	ENSMUST00000052172			Cxcr4			protein_coding
e11ve16_common_1437	chr1	128654184	128654645	+	1.04743	NA	Intergenic	Intergenic	-62121	ENSMUST00000142893.1	ENSMUSG00000045382	ENSMUST00000052172			Cxcr4			protein_coding
e11ve16_common_1438	chr1	128671272	128671770	+	1.90796	NA	Intergenic	Intergenic	-79228	ENSMUST00000142893.1	ENSMUSG00000045382	ENSMUST00000052172			Cxcr4			protein_coding
e11ve16_common_1439	chr1	128679028	128679856	+	0.8026	NA	Intergenic	Intergenic	-71484	ENSMUST00000185285.1	ENSMUSG00000099403	ENSMUST00000185285			Gm29599			processed_pseudogene
e11ve16_common_1440	chr1	128682814	128683536	+	0.62197	NA	Intergenic	Intergenic	-67751	ENSMUST00000185285.1	ENSMUSG00000099403	ENSMUST00000185285			Gm29599			processed_pseudogene
e11ve16_common_1441	chr1	128824172	128824985	+	0.0996	NA	Intergenic	Intergenic	-50157	ENSMUST00000181951.1	ENSMUSG00000097283	ENSMUST00000181951			Gm26686			lncRNA
e11ve16_common_1442	chr1	128832158	128833049	+	0.06301	NA	Intergenic	Intergenic	53416	ENSMUST00000082803.1	ENSMUSG00000064737	ENSMUST00000082803			Gm23056			snRNA
e11ve16_common_1443	chr1	130298898	130300469	+	0.96498	NA	Intergenic	Intergenic	-18425	ENSMUST00000155992.1	ENSMUSG00000086633	ENSMUST00000155992			Gm16081			lncRNA
e11ve16_common_1444	chr1	130350224	130350451	+	0.13758	NA	Intergenic	Intergenic	-69079	ENSMUST00000155992.1	ENSMUSG00000086633	ENSMUST00000155992			Gm16081			lncRNA
e11ve16_common_1445	chr1	130372082	130372591	+	0.15398	NA	Intergenic	Intergenic	50404	ENSMUST00000136497.1	ENSMUSG00000026401	ENSMUST00000112488			Cd55b			protein_coding
e11ve16_common_1446	chr1	130443087	130443687	+	1.17612	NA	intron (ENSMUST00000122830.1, intron 2 of 2)	protein_coding-intron (ENSMUST00000027650.12, intron 9 of 9)	5462	ENSMUST00000122830.1	ENSMUSG00000026399	ENSMUST00000133057			Cd55			protein_coding
e11ve16_common_1447	chr1	130461853	130462264	+	1.59701	NA	promoter-TSS (ENSMUST00000125681.1)	lncRNA-promoter-TSS (ENSMUST00000125681.1)	393	ENSMUST00000133057.1	ENSMUSG00000026399	ENSMUST00000133057			Cd55			protein_coding
e11ve16_common_1448	chr1	130462752	130463048	+	1.63561	NA	promoter-TSS (ENSMUST00000027650.12)	protein_coding-promoter-TSS (ENSMUST00000027650.12)	-156	ENSMUST00000027650.12	ENSMUSG00000026399	ENSMUST00000133057			Cd55			protein_coding
e11ve16_common_1449	chr1	130547932	130548462	+	0.28271	NA	intron (ENSMUST00000125681.1, intron 4 of 4)	lncRNA-intron (ENSMUST00000125681.1, intron 4 of 4)	47479	ENSMUST00000082461.1	ENSMUSG00000064395	ENSMUST00000082461			Gm23623			snRNA
e11ve16_common_1450	chr1	130633602	130634462	+	0.34789	NA	TTS (ENSMUST00000027657.13)	protein_coding-TTS (ENSMUST00000027657.13)	-4411	ENSMUST00000128128.7	ENSMUSG00000042554	ENSMUST00000128128			Zp3r			protein_coding
e11ve16_common_1451	chr1	130661541	130661868	+	0.84084	NA	promoter-TSS (ENSMUST00000027657.13)	protein_coding-promoter-TSS (ENSMUST00000027657.13)	-72	ENSMUST00000027657.13	ENSMUSG00000026405	ENSMUST00000171642			C4bp			protein_coding
e11ve16_common_1452	chr1	130715322	130715565	+	0.57294	NA	promoter-TSS (ENSMUST00000050406.10)	protein_coding-promoter-TSS (ENSMUST00000050406.10)	291	ENSMUST00000066863.12	ENSMUSG00000026409	ENSMUST00000189534			Pfkfb2			protein_coding
e11ve16_common_1453	chr1	130715970	130717384	+	0.83113	NA	promoter-TSS (ENSMUST00000049813.5)	protein_coding-promoter-TSS (ENSMUST00000049813.5)	561	ENSMUST00000186777.1	ENSMUSG00000026409	ENSMUST00000189534			Pfkfb2			protein_coding
e11ve16_common_1454	chr1	130717525	130717736	+	1.4318	NA	promoter-TSS (ENSMUST00000186777.1)	protein_coding-promoter-TSS (ENSMUST00000186777.1)	303	ENSMUST00000049813.5	ENSMUSG00000046404	ENSMUST00000049813			Yod1			protein_coding
e11ve16_common_1455	chr1	130731561	130732333	+	0.42396	NA	promoter-TSS (ENSMUST00000039323.7)	protein_coding-promoter-TSS (ENSMUST00000039323.7)	-29	ENSMUST00000039323.7	ENSMUSG00000042510	ENSMUST00000039323			AA986860			protein_coding
e11ve16_common_1456	chr1	130734371	130734764	+	1.4004	NA	intron (ENSMUST00000186185.1, intron 1 of 2)	protein_coding-intron (ENSMUST00000039323.7, intron 1 of 3)	2457	ENSMUST00000186185.1	ENSMUSG00000042510	ENSMUST00000039323			AA986860			protein_coding
e11ve16_common_1457	chr1	130763607	130763904	+	1.35791	NA	Intergenic	Intergenic	-2629	ENSMUST00000189150.1	ENSMUSG00000100106	ENSMUST00000189150			Gm28856			lncRNA
e11ve16_common_1458	chr1	130770796	130771121	+	1.99714	NA	intron (ENSMUST00000189150.1, intron 2 of 3)	lncRNA-intron (ENSMUST00000189150.1, intron 2 of 3)	4574	ENSMUST00000189150.1	ENSMUSG00000100106	ENSMUST00000189150			Gm28856			lncRNA
e11ve16_common_1459	chr1	130838273	130838919	+	0.12898	NA	intron (ENSMUST00000137782.1, intron 2 of 3)	protein_coding-intron (ENSMUST00000027675.13, intron 2 of 10)	9586	ENSMUST00000137782.1	ENSMUSG00000026417	ENSMUST00000137782			Pigr			protein_coding
e11ve16_common_1460	chr1	130877762	130878567	+	1.41449	NA	promoter-TSS (ENSMUST00000126821.1)	protein_coding-promoter-TSS (ENSMUST00000126821.1)	6	ENSMUST00000126821.1	ENSMUSG00000042474	ENSMUST00000145446			Fcmr			protein_coding
e11ve16_common_1461	chr1	131046024	131046385	+	0.09769	NA	Intergenic	Intergenic	26322	ENSMUST00000188459.3	ENSMUSG00000016528	ENSMUST00000016672			Mapkapk2			protein_coding
e11ve16_common_1462	chr1	131053026	131053491	+	0.73597	NA	TTS (ENSMUST00000016672.10)	protein_coding-TTS (ENSMUST00000016672.10)	19268	ENSMUST00000188459.3	ENSMUSG00000016528	ENSMUST00000016672			Mapkapk2			protein_coding
e11ve16_common_1463	chr1	131061668	131061991	+	0.46864	NA	intron (ENSMUST00000016672.10, intron 1 of 9)	protein_coding-intron (ENSMUST00000016672.10, intron 1 of 9)	10697	ENSMUST00000188459.3	ENSMUSG00000016528	ENSMUST00000016672			Mapkapk2			protein_coding
e11ve16_common_1464	chr1	131084469	131084839	+	1.02033	NA	intron (ENSMUST00000016672.10, intron 1 of 9)	protein_coding-intron (ENSMUST00000016672.10, intron 1 of 9)	7495	ENSMUST00000191688.1	ENSMUSG00000102856	ENSMUST00000191688			Gm37084			TEC
e11ve16_common_1465	chr1	131088678	131089419	+	0.77053	NA	exon (ENSMUST00000191688.1, exon 1 of 1)	TEC-exon (ENSMUST00000191688.1, exon 1 of 1)	3101	ENSMUST00000191688.1	ENSMUSG00000102856	ENSMUST00000191688			Gm37084			TEC
e11ve16_common_1466	chr1	131096156	131097947	+	1.22679	NA	intron (ENSMUST00000016672.10, intron 1 of 9)	protein_coding-intron (ENSMUST00000016672.10, intron 1 of 9)	775	ENSMUST00000016672.10	ENSMUSG00000016528	ENSMUST00000016672			Mapkapk2			protein_coding
e11ve16_common_1467	chr1	131107746	131108454	+	0.81476	NA	Intergenic	Intergenic	-5355	ENSMUST00000158631.1	ENSMUSG00000089256	ENSMUST00000158631			Gm25717			misc_RNA
e11ve16_common_1468	chr1	131137810	131139018	+	0.76151	NA	promoter-TSS (ENSMUST00000016670.8)	protein_coding-promoter-TSS (ENSMUST00000016670.8)	-74	ENSMUST00000016670.8	ENSMUSG00000016526	ENSMUST00000016670			Dyrk3			protein_coding
e11ve16_common_1469	chr1	131181586	131182089	+	0.44251	NA	intron (ENSMUST00000068564.14, intron 2 of 4)	protein_coding-intron (ENSMUST00000027688.14, intron 3 of 5)	15458	ENSMUST00000153651.1	ENSMUSG00000026427	ENSMUST00000068791			Eif2d			protein_coding
e11ve16_common_1470	chr1	131200240	131200517	+	1.1322	NA	promoter-TSS (ENSMUST00000068564.14)	protein_coding-promoter-TSS (ENSMUST00000068564.14)	-243	ENSMUST00000068564.14	ENSMUSG00000026430	ENSMUST00000027688			Rassf5			protein_coding
e11ve16_common_1471	chr1	131244695	131246586	+	0.26889	NA	promoter-TSS (ENSMUST00000027688.14)	protein_coding-promoter-TSS (ENSMUST00000027688.14)	-382	ENSMUST00000027688.14	ENSMUSG00000026430	ENSMUST00000027688			Rassf5			protein_coding
e11ve16_common_1472	chr1	131252144	131252938	+	0.21919	NA	Intergenic	Intergenic	-6966	ENSMUST00000188115.1	ENSMUSG00000102027	ENSMUST00000188115			Gm28914			lncRNA
e11ve16_common_1473	chr1	131270147	131270465	+	0.73087	NA	TTS (ENSMUST00000162285.1)	protein_coding-TTS (ENSMUST00000162285.1)	238	ENSMUST00000163029.1	ENSMUSG00000042349	ENSMUST00000062108			Ikbke			protein_coding
e11ve16_common_1474	chr1	131525936	131527413	+	1.01867	NA	intron (ENSMUST00000097588.8, intron 1 of 22)	protein_coding-intron (ENSMUST00000097588.8, intron 1 of 22)	673	ENSMUST00000097588.8	ENSMUSG00000026425	ENSMUST00000188604			Srgap2			protein_coding
e11ve16_common_1475	chr1	131527552	131528338	+	0.39309	NA	promoter-TSS (ENSMUST00000068613.4)	protein_coding-promoter-TSS (ENSMUST00000068613.4)	42	ENSMUST00000068613.4	ENSMUSG00000055184	ENSMUST00000068613			Fam72a			protein_coding
e11ve16_common_1476	chr1	131555069	131555358	+	1.28608	NA	Intergenic	Intergenic	27310	ENSMUST00000068613.4	ENSMUSG00000055184	ENSMUST00000068613			Fam72a			protein_coding
e11ve16_common_1477	chr1	131598939	131599160	+	2.19391	NA	promoter-TSS (ENSMUST00000027690.6)	protein_coding-promoter-TSS (ENSMUST00000027690.6)	-190	ENSMUST00000027690.6	ENSMUSG00000026432	ENSMUST00000027690			Avpr1b			protein_coding
e11ve16_common_1478	chr1	131613277	131613871	+	0.37911	NA	Intergenic	Intergenic	13851	ENSMUST00000190410.1	ENSMUSG00000026432	ENSMUST00000027690			Avpr1b			protein_coding
e11ve16_common_1479	chr1	131658091	131658351	+	1.12984	NA	intron (ENSMUST00000112411.1, intron 1 of 8)	protein_coding-intron (ENSMUST00000073350.12, intron 1 of 9)	-3690	ENSMUST00000141061.1	ENSMUSG00000004552	ENSMUST00000073350			Ctse			protein_coding
e11ve16_common_1480	chr1	131712261	131712589	+	0.1323	NA	TTS (ENSMUST00000129905.1)	protein_coding-TTS (ENSMUST00000129905.1)	15787	ENSMUST00000130848.1	ENSMUSG00000052688	ENSMUST00000130848			Rab7b			protein_coding
e11ve16_common_1481	chr1	131743809	131744694	+	0.65157	NA	intron (ENSMUST00000049027.9, intron 1 of 20)	protein_coding-intron (ENSMUST00000049027.9, intron 1 of 20)	213	ENSMUST00000186122.6	ENSMUSG00000042268	ENSMUST00000147800			Slc26a9			protein_coding
e11ve16_common_1482	chr1	131764466	131764979	+	2.18233	NA	TTS (ENSMUST00000186122.6)	protein_coding-TTS (ENSMUST00000186122.6)	14231	ENSMUST00000147800.1	ENSMUSG00000042268	ENSMUST00000147800			Slc26a9			protein_coding
e11ve16_common_1483	chr1	131765114	131765739	+	0.9979	NA	intron (ENSMUST00000049027.9, intron 18 of 20)	protein_coding-intron (ENSMUST00000049027.9, intron 18 of 20)	14935	ENSMUST00000147800.1	ENSMUSG00000042268	ENSMUST00000147800			Slc26a9			protein_coding
e11ve16_common_1484	chr1	131797273	131797742	+	1.59631	NA	exon (ENSMUST00000048660.11, exon 1 of 14)	protein_coding-exon (ENSMUST00000048660.11, exon 1 of 14)	109	ENSMUST00000048660.11	ENSMUSG00000042251	ENSMUST00000152989			Pm20d1			protein_coding
e11ve16_common_1485	chr1	131827429	131828815	+	0.34483	NA	exon (ENSMUST00000086559.6, exon 1 of 11)	protein_coding-exon (ENSMUST00000086559.6, exon 1 of 11)	145	ENSMUST00000086559.6	ENSMUSG00000013275	ENSMUST00000132585			Slc41a1			protein_coding
e11ve16_common_1486	chr1	131867136	131868094	+	0.68311	NA	promoter-TSS (ENSMUST00000187084.1)	protein_coding-promoter-TSS (ENSMUST00000187084.1)	-38	ENSMUST00000187084.1	ENSMUSG00000026433	ENSMUST00000112386			Rab29			protein_coding
e11ve16_common_1487	chr1	131910083	131911424	+	1.00061	NA	intron (ENSMUST00000189946.6, intron 1 of 6)	protein_coding-intron (ENSMUST00000062264.7, intron 1 of 6)	197	ENSMUST00000062264.7	ENSMUSG00000026434	ENSMUST00000189946			Nucks1			protein_coding
e11ve16_common_1488	chr1	131962738	131963962	+	1.48047	NA	intron (ENSMUST00000177943.7, intron 1 of 4)	protein_coding-intron (ENSMUST00000177943.7, intron 1 of 4)	383	ENSMUST00000177943.7	ENSMUSG00000026435	ENSMUST00000185387			Slc45a3			protein_coding
e11ve16_common_1489	chr1	131970114	131970549	+	1.33598	NA	promoter-TSS (ENSMUST00000027695.7)	protein_coding-promoter-TSS (ENSMUST00000027695.7)	-278	ENSMUST00000027695.7	ENSMUSG00000026435	ENSMUST00000185387			Slc45a3			protein_coding
e11ve16_common_1490	chr1	131981510	131981903	+	0.1184	NA	exon (ENSMUST00000027695.7, exon 5 of 5)	protein_coding-exon (ENSMUST00000027695.7, exon 5 of 5)	2742	ENSMUST00000185387.1	ENSMUSG00000026435	ENSMUST00000185387			Slc45a3			protein_coding
e11ve16_common_1491	chr1	132007346	132008627	+	0.42491	NA	promoter-TSS (ENSMUST00000124579.1)	protein_coding-promoter-TSS (ENSMUST00000124579.1)	110	ENSMUST00000027696.9	ENSMUSG00000026436	ENSMUST00000131159			Elk4			protein_coding
e11ve16_common_1492	chr1	132067526	132068195	+	0.23626	NA	promoter-TSS (ENSMUST00000046658.9)	protein_coding-promoter-TSS (ENSMUST00000046658.9)	-34	ENSMUST00000160656.7	ENSMUSG00000059149	ENSMUST00000163016			Mfsd4a			protein_coding
e11ve16_common_1493	chr1	132138955	132140335	+	0.46406	NA	promoter-TSS (ENSMUST00000027697.11)	protein_coding-promoter-TSS (ENSMUST00000027697.11)	39	ENSMUST00000027697.11	ENSMUSG00000026437	ENSMUST00000189733			Cdk18			protein_coding
e11ve16_common_1494	chr1	132151150	132151676	+	0.76746	NA	Intergenic	Intergenic	-11729	ENSMUST00000027697.11	ENSMUSG00000026437	ENSMUST00000189733			Cdk18			protein_coding
e11ve16_common_1495	chr1	132190200	132192355	+	1.11822	NA	promoter-TSS (ENSMUST00000112357.8)	protein_coding-promoter-TSS (ENSMUST00000112357.8)	-154	ENSMUST00000188169.6	ENSMUSG00000079330	ENSMUST00000189062			Lemd1			protein_coding
e11ve16_common_1496	chr1	132200818	132201131	+	0.07674	NA	promoter-TSS (ENSMUST00000189062.1)	protein_coding-promoter-TSS (ENSMUST00000189062.1)	11	ENSMUST00000189062.1	ENSMUSG00000079330	ENSMUST00000189062			Lemd1			protein_coding
e11ve16_common_1497	chr1	132211183	132212500	+	0.55247	NA	intron (ENSMUST00000188169.6, intron 1 of 4)	protein_coding-intron (ENSMUST00000112357.8, intron 1 of 3)	7989	ENSMUST00000185223.1	ENSMUSG00000079330	ENSMUST00000189062			Lemd1			protein_coding
e11ve16_common_1498	chr1	132266782	132267497	+	0.15025	NA	Intergenic	Intergenic	13272	ENSMUST00000185761.1	ENSMUSG00000101549	ENSMUST00000185761			Gm29630			lncRNA
e11ve16_common_1499	chr1	132269413	132269623	+	0.06191	NA	Intergenic	Intergenic	10893	ENSMUST00000185761.1	ENSMUSG00000101549	ENSMUST00000185761			Gm29630			lncRNA
e11ve16_common_1500	chr1	132294965	132295696	+	1.0822	NA	Intergenic	Intergenic	-3296	ENSMUST00000046071.4	ENSMUSG00000042115	ENSMUST00000046071			Klhdc8a			protein_coding
e11ve16_common_1501	chr1	132298371	132299278	+	0.77052	NA	exon (ENSMUST00000046071.4, exon 1 of 5)	protein_coding-exon (ENSMUST00000046071.4, exon 1 of 5)	198	ENSMUST00000046071.4	ENSMUSG00000042115	ENSMUST00000046071			Klhdc8a			protein_coding
e11ve16_common_1502	chr1	132315915	132316475	+	0.60039	NA	promoter-TSS (ENSMUST00000072177.13)	protein_coding-promoter-TSS (ENSMUST00000072177.13)	30	ENSMUST00000128661.1	ENSMUSG00000009772	ENSMUST00000072177			Nuak2			protein_coding
e11ve16_common_1503	chr1	132333747	132334300	+	0.38068	NA	TTS (ENSMUST00000072177.13)	protein_coding-TTS (ENSMUST00000072177.13)	6427	ENSMUST00000133246.1	ENSMUSG00000009772	ENSMUST00000072177			Nuak2			protein_coding
e11ve16_common_1504	chr1	132355504	132355918	+	0.72874	NA	TTS (ENSMUST00000045473.15)	protein_coding-TTS (ENSMUST00000045473.15)	9237	ENSMUST00000125439.1	ENSMUSG00000042066	ENSMUST00000045473			Tmcc2			protein_coding
e11ve16_common_1505	chr1	132417340	132418212	+	0.64328	NA	promoter-TSS (ENSMUST00000188973.1)	protein_coding-promoter-TSS (ENSMUST00000188973.1)	172	ENSMUST00000188389.1	ENSMUSG00000042046	ENSMUST00000188006			Dstyk			protein_coding
e11ve16_common_1506	chr1	132477095	132477328	+	2.21144	NA	promoter-TSS (ENSMUST00000027700.14)	protein_coding-promoter-TSS (ENSMUST00000027700.14)	-147	ENSMUST00000188203.1	ENSMUSG00000097760	ENSMUST00000180835			6030442K20Rik			lncRNA
e11ve16_common_1507	chr1	132520412	132521007	+	0.11992	NA	intron (ENSMUST00000186487.6, intron 15 of 21)	protein_coding-intron (ENSMUST00000086521.10, intron 16 of 22)	-1552	ENSMUST00000188143.1	ENSMUSG00000053024	ENSMUST00000186487			Cntn2			protein_coding
e11ve16_common_1508	chr1	133024973	133025706	+	0.78513	NA	promoter-TSS (ENSMUST00000067398.12)	protein_coding-promoter-TSS (ENSMUST00000067398.12)	-1	ENSMUST00000186617.6	ENSMUSG00000054387	ENSMUST00000067398			Mdm4			protein_coding
e11ve16_common_1509	chr1	133033215	133033985	+	0.8766	NA	Intergenic	Intergenic	-3039	ENSMUST00000190807.1	ENSMUSG00000054387	ENSMUST00000067398			Mdm4			protein_coding
e11ve16_common_1510	chr1	133046044	133046881	+	0.94759	NA	intron (ENSMUST00000145153.7, intron 1 of 1)	protein_coding-intron (ENSMUST00000077730.6, intron 1 of 32)	450	ENSMUST00000124934.7	ENSMUSG00000026447	ENSMUST00000145153			Pik3c2b			protein_coding
e11ve16_common_1511	chr1	133090134	133091813	+	1.0891	NA	intron (ENSMUST00000077730.6, intron 19 of 32)	protein_coding-intron (ENSMUST00000077730.6, intron 19 of 32)	-22568	ENSMUST00000186515.1	ENSMUSG00000101102	ENSMUST00000186515			Gm28609			lncRNA
e11ve16_common_1512	chr1	133130772	133132105	+	0.93214	NA	promoter-TSS (ENSMUST00000122956.1)	protein_coding-promoter-TSS (ENSMUST00000122956.1)	94	ENSMUST00000122956.1	ENSMUSG00000046062	ENSMUST00000122956			Ppp1r15b			protein_coding
e11ve16_common_1513	chr1	133163878	133164570	+	1.27343	NA	promoter-TSS (ENSMUST00000212252.1)	protein_coding-promoter-TSS (ENSMUST00000212252.1)	14	ENSMUST00000212252.1	ENSMUSG00000041757	ENSMUST00000038295			Plekha6			protein_coding
e11ve16_common_1514	chr1	133182518	133182821	+	2.36319	NA	intron (ENSMUST00000187285.6, intron 1 of 22)	protein_coding-intron (ENSMUST00000187285.6, intron 1 of 22)	1348	ENSMUST00000187285.6	ENSMUSG00000041757	ENSMUST00000038295			Plekha6			protein_coding
e11ve16_common_1515	chr1	133236839	133237536	+	0.14048	NA	intron (ENSMUST00000187285.6, intron 1 of 22)	protein_coding-intron (ENSMUST00000187285.6, intron 1 of 22)	-8910	ENSMUST00000105082.8	ENSMUSG00000041757	ENSMUST00000038295			Plekha6			protein_coding
e11ve16_common_1516	chr1	133245385	133246457	+	0.25516	NA	promoter-TSS (ENSMUST00000038295.14)	protein_coding-promoter-TSS (ENSMUST00000038295.14)	-176	ENSMUST00000105082.8	ENSMUSG00000041757	ENSMUST00000038295			Plekha6			protein_coding
e11ve16_common_1517	chr1	133307026	133307521	+	1.28198	NA	Intergenic	Intergenic	-2527	ENSMUST00000094557.6	ENSMUSG00000103421	ENSMUST00000094557			Golt1a			protein_coding
e11ve16_common_1518	chr1	133328632	133329729	+	0.4962	NA	intron (ENSMUST00000194044.5, intron 2 of 2)	protein_coding-intron (ENSMUST00000007433.4, intron 2 of 2)	1968	ENSMUST00000178033.4	ENSMUSG00000116158	ENSMUST00000178033			Kiss1			protein_coding
e11ve16_common_1519	chr1	133353438	133353759	+	0.11407	NA	intron (ENSMUST00000112287.1, intron 1 of 1)	protein_coding-intron (ENSMUST00000094556.2, intron 1 of 8)	1689	ENSMUST00000112287.1	ENSMUSG00000070645	ENSMUST00000094556			Ren1			protein_coding
e11ve16_common_1520	chr1	133363237	133363775	+	1.98682	NA	promoter-TSS (ENSMUST00000135222.8)	protein_coding-promoter-TSS (ENSMUST00000135222.8)	-66	ENSMUST00000135222.8	ENSMUSG00000070644	ENSMUST00000156832			Etnk2			protein_coding
e11ve16_common_1521	chr1	133364278	133364533	+	1.50998	NA	promoter-TSS (ENSMUST00000129213.1)	protein_coding-promoter-TSS (ENSMUST00000129213.1)	829	ENSMUST00000147909.7	ENSMUSG00000070644	ENSMUST00000156832			Etnk2			protein_coding
e11ve16_common_1522	chr1	133417928	133418549	+	1.0347	NA	intron (ENSMUST00000153799.7, intron 1 of 13)	protein_coding-intron (ENSMUST00000153799.7, intron 1 of 13)	6139	ENSMUST00000153799.7	ENSMUSG00000070643	ENSMUST00000145922			Sox13			protein_coding
e11ve16_common_1523	chr1	133423439	133424447	+	1.27672	NA	exon (ENSMUST00000153799.7, exon 1 of 14)	protein_coding-exon (ENSMUST00000153799.7, exon 1 of 14)	434	ENSMUST00000153799.7	ENSMUSG00000070643	ENSMUST00000145922			Sox13			protein_coding
e11ve16_common_1524	chr1	133434375	133435013	+	0.34323	NA	Intergenic	Intergenic	-10317	ENSMUST00000153799.7	ENSMUSG00000070643	ENSMUST00000145922			Sox13			protein_coding
e11ve16_common_1525	chr1	133492291	133492905	+	0.62784	NA	Intergenic	Intergenic	-36881	ENSMUST00000188004.1	ENSMUSG00000101004	ENSMUST00000188004			Gm8596			processed_pseudogene
e11ve16_common_1526	chr1	133609792	133610486	+	0.19741	NA	promoter-TSS (ENSMUST00000164574.1)	protein_coding-promoter-TSS (ENSMUST00000164574.1)	76	ENSMUST00000164574.1	ENSMUSG00000090553	ENSMUST00000171264			Snrpe			protein_coding
e11ve16_common_1527	chr1	133660901	133661563	+	1.26583	NA	promoter-TSS (ENSMUST00000179598.3)	protein_coding-promoter-TSS (ENSMUST00000179598.3)	49	ENSMUST00000191705.5	ENSMUSG00000102976	ENSMUST00000192148			Zc3h11a			protein_coding
e11ve16_common_1528	chr1	133695479	133696414	+	0.27953	NA	Intergenic	Intergenic	-5838	ENSMUST00000169295.7	ENSMUSG00000051998	ENSMUST00000189524			Lax1			protein_coding
e11ve16_common_1529	chr1	133767461	133767856	+	0.85566	NA	intron (ENSMUST00000143567.7, intron 1 of 20)	protein_coding-intron (ENSMUST00000128692.1, intron 2 of 2)	10763	ENSMUST00000193173.1	ENSMUSG00000102509	ENSMUST00000193173			Gm37368			TEC
e11ve16_common_1530	chr1	133800281	133801501	+	0.71008	NA	exon (ENSMUST00000128692.1, exon 1 of 3)	protein_coding-exon (ENSMUST00000128692.1, exon 1 of 3)	145	ENSMUST00000128692.1	ENSMUSG00000026463	ENSMUST00000167348			Atp2b4			protein_coding
e11ve16_common_1531	chr1	133863477	133863828	+	0.4813	NA	Intergenic	Intergenic	28463	ENSMUST00000190927.1	ENSMUSG00000100830	ENSMUST00000190927			Gm28441			lncRNA
e11ve16_common_1532	chr1	133908458	133908891	+	0.34871	NA	promoter-TSS (ENSMUST00000153617.8)	protein_coding-promoter-TSS (ENSMUST00000153617.8)	-675	ENSMUST00000153617.8	ENSMUSG00000010311	ENSMUST00000124051			Optc			protein_coding
e11ve16_common_1533	chr1	133920345	133921661	+	1.22077	NA	intron (ENSMUST00000048432.5, intron 1 of 2)	protein_coding-intron (ENSMUST00000048432.5, intron 1 of 2)	408	ENSMUST00000127583.1	ENSMUSG00000041577	ENSMUST00000127583			Prelp			protein_coding
e11ve16_common_1534	chr1	133961607	133962185	+	0.17289	NA	promoter-TSS (ENSMUST00000188504.1)	lncRNA-promoter-TSS (ENSMUST00000188504.1)	-266	ENSMUST00000188504.1	ENSMUSG00000100987	ENSMUST00000188504			Gm1627			lncRNA
e11ve16_common_1535	chr1	134005861	134007003	+	0.40027	NA	Intergenic	Intergenic	26946	ENSMUST00000186040.1	ENSMUSG00000099507	ENSMUST00000186040			Gm18970			processed_pseudogene
e11ve16_common_1536	chr1	134036903	134037836	+	0.33814	NA	promoter-TSS (ENSMUST00000162779.1)	protein_coding-promoter-TSS (ENSMUST00000162779.1)	115	ENSMUST00000048183.7	ENSMUSG00000041559	ENSMUST00000048183			Fmod			protein_coding
e11ve16_common_1537	chr1	134048972	134049543	+	0.06685	NA	TTS (ENSMUST00000048183.7)	protein_coding-TTS (ENSMUST00000048183.7)	11761	ENSMUST00000162779.1	ENSMUSG00000041559	ENSMUST00000048183			Fmod			protein_coding
e11ve16_common_1538	chr1	134060572	134061452	+	0.52041	NA	Intergenic	Intergenic	18108	ENSMUST00000020692.6	ENSMUSG00000020423	ENSMUST00000020692			Btg2			protein_coding
e11ve16_common_1539	chr1	134063154	134063503	+	0.71587	NA	Intergenic	Intergenic	15792	ENSMUST00000020692.6	ENSMUSG00000020423	ENSMUST00000020692			Btg2			protein_coding
e11ve16_common_1540	chr1	134067154	134067424	+	0.43169	NA	Intergenic	Intergenic	11831	ENSMUST00000020692.6	ENSMUSG00000020423	ENSMUST00000020692			Btg2			protein_coding
e11ve16_common_1541	chr1	134069936	134070915	+	0.08988	NA	Intergenic	Intergenic	8695	ENSMUST00000020692.6	ENSMUSG00000020423	ENSMUST00000020692			Btg2			protein_coding
e11ve16_common_1542	chr1	134078249	134078730	+	0.39757	NA	intron (ENSMUST00000020692.6, intron 1 of 1)	protein_coding-intron (ENSMUST00000020692.6, intron 1 of 1)	631	ENSMUST00000020692.6	ENSMUSG00000020423	ENSMUST00000020692			Btg2			protein_coding
e11ve16_common_1543	chr1	134079169	134079504	+	2.05477	NA	promoter-TSS (ENSMUST00000020692.6)	protein_coding-promoter-TSS (ENSMUST00000020692.6)	-216	ENSMUST00000020692.6	ENSMUSG00000020423	ENSMUST00000020692			Btg2			protein_coding
e11ve16_common_1544	chr1	134092832	134093608	+	0.88403	NA	Intergenic	Intergenic	5939	ENSMUST00000193617.1	ENSMUSG00000102380	ENSMUST00000193617			Gm38140			TEC
e11ve16_common_1545	chr1	134098978	134099639	+	0.95684	NA	promoter-TSS (ENSMUST00000193617.1)	TEC-promoter-TSS (ENSMUST00000193617.1)	-149	ENSMUST00000193617.1	ENSMUSG00000102380	ENSMUST00000193617			Gm38140			TEC
e11ve16_common_1546	chr1	134106031	134106898	+	0.1531	NA	Intergenic	Intergenic	-2904	ENSMUST00000097570.2	ENSMUSG00000073559	ENSMUST00000097570			Gm8618			processed_pseudogene
e11ve16_common_1547	chr1	134234852	134235529	+	0.16163	NA	promoter-TSS (ENSMUST00000169927.1)	protein_coding-promoter-TSS (ENSMUST00000169927.1)	174	ENSMUST00000187631.1	ENSMUSG00000042429	ENSMUST00000038191			Adora1			protein_coding
e11ve16_common_1548	chr1	134244135	134244656	+	1.41767	NA	Intergenic	Intergenic	-8964	ENSMUST00000086465.5	ENSMUSG00000042429	ENSMUST00000038191			Adora1			protein_coding
e11ve16_common_1549	chr1	134298782	134299397	+	0.10567	NA	exon (ENSMUST00000168515.7, exon 28 of 29)	protein_coding-exon (ENSMUST00000168515.7, exon 28 of 29)	5719	ENSMUST00000189862.6	ENSMUSG00000026458	ENSMUST00000189361			Ppfia4			protein_coding
e11ve16_common_1550	chr1	134344094	134344474	+	1.79331	NA	Intergenic	Intergenic	6021	ENSMUST00000189572.1	ENSMUSG00000042305	ENSMUST00000188205			Tmem183a			protein_coding
e11ve16_common_1551	chr1	134344611	134344896	+	1.75964	NA	Intergenic	Intergenic	5552	ENSMUST00000189572.1	ENSMUSG00000042305	ENSMUST00000188205			Tmem183a			protein_coding
e11ve16_common_1552	chr1	134361358	134362332	+	0.43676	NA	promoter-TSS (ENSMUST00000185903.1)	protein_coding-promoter-TSS (ENSMUST00000185903.1)	96	ENSMUST00000191237.6	ENSMUSG00000042305	ENSMUST00000188205			Tmem183a			protein_coding
e11ve16_common_1553	chr1	134405707	134406449	+	0.20623	NA	promoter-TSS (ENSMUST00000127412.8)	protein_coding-promoter-TSS (ENSMUST00000127412.8)	50	ENSMUST00000133686.7	ENSMUSG00000026456	ENSMUST00000130836			Cyb5r1			protein_coding
e11ve16_common_1554	chr1	134414902	134415963	+	0.47572	NA	promoter-TSS (ENSMUST00000027727.14)	protein_coding-promoter-TSS (ENSMUST00000027727.14)	-24	ENSMUST00000112237.1	ENSMUSG00000026457	ENSMUST00000148822			Adipor1			protein_coding
e11ve16_common_1555	chr1	134454997	134455897	+	0.51058	NA	promoter-TSS (ENSMUST00000027725.10)	protein_coding-promoter-TSS (ENSMUST00000027725.10)	26	ENSMUST00000192012.1	ENSMUSG00000102722	ENSMUST00000192012			Gm37935			TEC
e11ve16_common_1556	chr1	134494243	134495221	+	0.55239	NA	promoter-TSS (ENSMUST00000047978.8)	protein_coding-promoter-TSS (ENSMUST00000047978.8)	84	ENSMUST00000047978.8	ENSMUSG00000042229	ENSMUST00000047978			Rabif			protein_coding
e11ve16_common_1557	chr1	134513199	134513810	+	0.76309	NA	Intergenic	Intergenic	-4577	ENSMUST00000179718.1	ENSMUSG00000096712	ENSMUST00000179718			Gm15454			processed_pseudogene
e11ve16_common_1558	chr1	134516748	134517045	+	0.07788	NA	Intergenic	Intergenic	-1185	ENSMUST00000179718.1	ENSMUSG00000096712	ENSMUST00000179718			Gm15454			processed_pseudogene
e11ve16_common_1559	chr1	134555030	134556057	+	0.54448	NA	Intergenic	Intergenic	-4628	ENSMUST00000047714.13	ENSMUSG00000042207	ENSMUST00000047714			Kdm5b			protein_coding
e11ve16_common_1560	chr1	134556185	134556413	+	0.92548	NA	Intergenic	Intergenic	-3872	ENSMUST00000047714.13	ENSMUSG00000042207	ENSMUST00000047714			Kdm5b			protein_coding
e11ve16_common_1561	chr1	134556522	134557092	+	2.18182	NA	Intergenic	Intergenic	-3364	ENSMUST00000047714.13	ENSMUSG00000042207	ENSMUST00000047714			Kdm5b			protein_coding
e11ve16_common_1562	chr1	134560243	134560827	+	1.13437	NA	exon (ENSMUST00000047714.13, exon 1 of 27)	protein_coding-exon (ENSMUST00000047714.13, exon 1 of 27)	328	ENSMUST00000112197.2	ENSMUSG00000042207	ENSMUST00000047714			Kdm5b			protein_coding
e11ve16_common_1563	chr1	134643594	134644256	+	0.83449	NA	exon (ENSMUST00000181197.1, exon 2 of 2)	lncRNA-exon (ENSMUST00000181197.1, exon 2 of 2)	2595	ENSMUST00000181197.1	ENSMUSG00000097435	ENSMUST00000181197			Gm26783			lncRNA
e11ve16_common_1564	chr1	134713522	134713740	+	1.86259	NA	intron (ENSMUST00000121990.1, intron 1 of 8)	protein_coding-intron (ENSMUST00000121990.1, intron 1 of 8)	4331	ENSMUST00000121990.1	ENSMUSG00000026452	ENSMUST00000121990			Syt2			protein_coding
e11ve16_common_1565	chr1	134754986	134755503	+	0.24883	NA	TTS (ENSMUST00000137022.1)	protein_coding-TTS (ENSMUST00000137022.1)	5109	ENSMUST00000137022.1	ENSMUSG00000073557	ENSMUST00000191540			Ppp1r12b			protein_coding
e11ve16_common_1566	chr1	134783890	134784197	+	0.96437	NA	promoter-TSS (ENSMUST00000191540.1)	protein_coding-promoter-TSS (ENSMUST00000191540.1)	-746	ENSMUST00000191540.1	ENSMUSG00000073557	ENSMUST00000191540			Ppp1r12b			protein_coding
e11ve16_common_1567	chr1	134804047	134804481	+	1.45639	NA	promoter-TSS (ENSMUST00000141419.1)	protein_coding-promoter-TSS (ENSMUST00000141419.1)	-413	ENSMUST00000141419.1	ENSMUSG00000073557	ENSMUST00000191540			Ppp1r12b			protein_coding
e11ve16_common_1568	chr1	134940725	134941225	+	0.77406	NA	intron (ENSMUST00000132025.1, intron 1 of 19)	protein_coding-intron (ENSMUST00000045665.12, intron 1 of 23)	14876	ENSMUST00000168381.7	ENSMUSG00000073557	ENSMUST00000191540			Ppp1r12b			protein_coding
e11ve16_common_1569	chr1	134955283	134956233	+	0.39114	NA	promoter-TSS (ENSMUST00000168381.7)	protein_coding-promoter-TSS (ENSMUST00000168381.7)	93	ENSMUST00000168381.7	ENSMUSG00000073557	ENSMUST00000191540			Ppp1r12b			protein_coding
e11ve16_common_1570	chr1	134962065	134962826	+	0.98286	NA	promoter-TSS (ENSMUST00000027687.7)	protein_coding-promoter-TSS (ENSMUST00000027687.7)	-120	ENSMUST00000027687.7	ENSMUSG00000026429	ENSMUST00000188177			Ube2t			protein_coding
e11ve16_common_1571	chr1	135021135	135021403	+	0.17194	NA	intron (ENSMUST00000044828.13, intron 6 of 17)	protein_coding-intron (ENSMUST00000044828.13, intron 6 of 17)	822	ENSMUST00000139369.1	ENSMUSG00000042793	ENSMUST00000044828			Lgr6			protein_coding
e11ve16_common_1572	chr1	135105011	135106120	+	1.09508	NA	promoter-TSS (ENSMUST00000044828.13)	protein_coding-promoter-TSS (ENSMUST00000044828.13)	-289	ENSMUST00000044828.13	ENSMUSG00000042793	ENSMUST00000044828			Lgr6			protein_coding
e11ve16_common_1573	chr1	135146516	135147660	+	0.95657	NA	promoter-TSS (ENSMUST00000125774.1)	protein_coding-promoter-TSS (ENSMUST00000125774.1)	264	ENSMUST00000027684.10	ENSMUSG00000026426	ENSMUST00000123344			Arl8a			protein_coding
e11ve16_common_1574	chr1	135154495	135154875	+	0.32789	NA	TTS (ENSMUST00000123344.1)	protein_coding-TTS (ENSMUST00000123344.1)	503	ENSMUST00000141177.1	ENSMUSG00000026426	ENSMUST00000123344			Arl8a			protein_coding
e11ve16_common_1575	chr1	135198853	135199720	+	0.60707	NA	Intergenic	Intergenic	-31605	ENSMUST00000027682.8	ENSMUSG00000026424	ENSMUST00000027682			Gpr37l1			protein_coding
e11ve16_common_1576	chr1	135248476	135248741	+	0.11682	NA	promoter-TSS (ENSMUST00000180981.1)	lncRNA-promoter-TSS (ENSMUST00000180981.1)	47	ENSMUST00000180981.1	ENSMUSG00000097680	ENSMUST00000180981			Gm26642			lncRNA
e11ve16_common_1577	chr1	135258244	135259258	+	0.14449	NA	promoter-TSS (ENSMUST00000003135.13)	protein_coding-promoter-TSS (ENSMUST00000003135.13)	-183	ENSMUST00000003135.13	ENSMUSG00000003051	ENSMUST00000185752			Elf3			protein_coding
e11ve16_common_1578	chr1	135283185	135284291	+	0.50094	NA	exon (ENSMUST00000074357.7, exon 1 of 10)	protein_coding-exon (ENSMUST00000074357.7, exon 1 of 10)	346	ENSMUST00000074357.7	ENSMUSG00000041926	ENSMUST00000152169			Rnpep			protein_coding
e11ve16_common_1579	chr1	135313289	135314080	+	1.4193	NA	promoter-TSS (ENSMUST00000081104.9)	protein_coding-promoter-TSS (ENSMUST00000081104.9)	7	ENSMUST00000134088.2	ENSMUSG00000062580	ENSMUST00000125454			Timm17a			protein_coding
e11ve16_common_1580	chr1	135324241	135325143	+	1.42342	NA	promoter-TSS (ENSMUST00000059352.2)	protein_coding-promoter-TSS (ENSMUST00000059352.2)	-115	ENSMUST00000059352.2	ENSMUSG00000048096	ENSMUST00000059352			Lmod1			protein_coding
e11ve16_common_1581	chr1	135347619	135348018	+	1.1773	NA	intron (ENSMUST00000059352.2, intron 1 of 2)	protein_coding-intron (ENSMUST00000059352.2, intron 1 of 2)	6004	ENSMUST00000157234.1	ENSMUSG00000087859	ENSMUST00000157234			Gm22796			snRNA
e11ve16_common_1582	chr1	135368286	135369316	+	0.78376	NA	TTS (ENSMUST00000059352.2)	protein_coding-TTS (ENSMUST00000059352.2)	4649	ENSMUST00000159918.1	ENSMUSG00000041889	ENSMUST00000041240			Shisa4			protein_coding
e11ve16_common_1583	chr1	135375000	135375640	+	0.53094	NA	promoter-TSS (ENSMUST00000041240.3)	protein_coding-promoter-TSS (ENSMUST00000041240.3)	-83	ENSMUST00000041240.3	ENSMUSG00000041889	ENSMUST00000041240			Shisa4			protein_coding
e11ve16_common_1584	chr1	135430027	135430521	+	2.10444	NA	exon (ENSMUST00000041023.13, exon 1 of 24)	protein_coding-exon (ENSMUST00000041023.13, exon 1 of 24)	145	ENSMUST00000159173.1	ENSMUSG00000041879	ENSMUST00000159487			Ipo9			protein_coding
e11ve16_common_1585	chr1	135499008	135499226	+	0.07356	NA	intron (ENSMUST00000190298.7, intron 6 of 30)	protein_coding-intron (ENSMUST00000040599.14, intron 3 of 29)	11267	ENSMUST00000189362.6	ENSMUSG00000009418	ENSMUST00000187311			Nav1			protein_coding
e11ve16_common_1586	chr1	135515476	135515710	+	2.2164	NA	intron (ENSMUST00000190298.7, intron 6 of 30)	protein_coding-intron (ENSMUST00000040599.14, intron 3 of 29)	-5142	ENSMUST00000190130.1	ENSMUSG00000009418	ENSMUST00000187311			Nav1			protein_coding
e11ve16_common_1587	chr1	135557710	135558382	+	0.67343	NA	intron (ENSMUST00000190298.7, intron 4 of 30)	protein_coding-intron (ENSMUST00000040599.14, intron 1 of 29)	-26727	ENSMUST00000067468.5	ENSMUSG00000054412	ENSMUST00000067468			Gm4793			lncRNA
e11ve16_common_1588	chr1	135584779	135585023	+	1.87098	NA	exon (ENSMUST00000040599.14, exon 1 of 30)	protein_coding-exon (ENSMUST00000040599.14, exon 1 of 30)	128	ENSMUST00000067468.5	ENSMUSG00000054412	ENSMUST00000067468			Gm4793			lncRNA
e11ve16_common_1589	chr1	135585190	135585799	+	2.6578	NA	promoter-TSS (ENSMUST00000040599.14)	protein_coding-promoter-TSS (ENSMUST00000040599.14)	-139	ENSMUST00000040599.14	ENSMUSG00000009418	ENSMUST00000187311			Nav1			protein_coding
e11ve16_common_1590	chr1	135616025	135616411	+	0.12278	NA	intron (ENSMUST00000112103.1, intron 1 of 1)	protein_coding-intron (ENSMUST00000112103.1, intron 1 of 1)	-30513	ENSMUST00000067414.12	ENSMUSG00000009418	ENSMUST00000187311			Nav1			protein_coding
e11ve16_common_1591	chr1	135670584	135670849	+	2.16184	NA	intron (ENSMUST00000112103.1, intron 1 of 1)	protein_coding-intron (ENSMUST00000112103.1, intron 1 of 1)	17389	ENSMUST00000190298.7	ENSMUSG00000009418	ENSMUST00000187311			Nav1			protein_coding
e11ve16_common_1592	chr1	135687563	135688523	+	1.02352	NA	promoter-TSS (ENSMUST00000112103.1)	protein_coding-promoter-TSS (ENSMUST00000112103.1)	62	ENSMUST00000190298.7	ENSMUSG00000009418	ENSMUST00000187311			Nav1			protein_coding
e11ve16_common_1593	chr1	135699286	135699555	+	0.45424	NA	Intergenic	Intergenic	-11315	ENSMUST00000112103.1	ENSMUSG00000009418	ENSMUST00000187311			Nav1			protein_coding
e11ve16_common_1594	chr1	135719712	135720093	+	1.20529	NA	promoter-TSS (ENSMUST00000097561.8)	protein_coding-promoter-TSS (ENSMUST00000097561.8)	-159	ENSMUST00000097561.8	ENSMUSG00000026421	ENSMUST00000097561			Csrp1			protein_coding
e11ve16_common_1595	chr1	135729050	135729854	+	1.31376	NA	intron (ENSMUST00000027677.7, intron 1 of 5)	protein_coding-intron (ENSMUST00000027677.7, intron 1 of 5)	305	ENSMUST00000027677.7	ENSMUSG00000026421	ENSMUST00000097561			Csrp1			protein_coding
e11ve16_common_1596	chr1	135731522	135731776	+	1.78086	NA	intron (ENSMUST00000027677.7, intron 1 of 5)	protein_coding-intron (ENSMUST00000027677.7, intron 1 of 5)	2502	ENSMUST00000027677.7	ENSMUSG00000026421	ENSMUST00000097561			Csrp1			protein_coding
e11ve16_common_1597	chr1	135731906	135732158	+	1.70583	NA	intron (ENSMUST00000027677.7, intron 1 of 5)	protein_coding-intron (ENSMUST00000027677.7, intron 1 of 5)	2885	ENSMUST00000027677.7	ENSMUSG00000026421	ENSMUST00000097561			Csrp1			protein_coding
e11ve16_common_1598	chr1	135752778	135753183	+	1.11525	NA	TTS (ENSMUST00000027677.7)	protein_coding-TTS (ENSMUST00000027677.7)	-13139	ENSMUST00000038945.5	ENSMUSG00000041801	ENSMUST00000136445			Phlda3			protein_coding
e11ve16_common_1599	chr1	135765741	135766779	+	0.7098	NA	promoter-TSS (ENSMUST00000136445.1)	protein_coding-promoter-TSS (ENSMUST00000136445.1)	141	ENSMUST00000038945.5	ENSMUSG00000041801	ENSMUST00000136445			Phlda3			protein_coding
e11ve16_common_1600	chr1	135818451	135818906	+	1.30816	NA	promoter-TSS (ENSMUST00000038760.9)	protein_coding-promoter-TSS (ENSMUST00000038760.9)	80	ENSMUST00000038760.9	ENSMUSG00000041782	ENSMUST00000185756			Lad1			protein_coding
e11ve16_common_1601	chr1	135820826	135821348	+	0.37595	NA	intron (ENSMUST00000038760.9, intron 1 of 9)	protein_coding-intron (ENSMUST00000038760.9, intron 1 of 9)	2489	ENSMUST00000038760.9	ENSMUSG00000041782	ENSMUST00000185756			Lad1			protein_coding
e11ve16_common_1602	chr1	135847305	135847531	+	1.71168	NA	intron (ENSMUST00000112086.2, intron 5 of 13)	protein_coding-intron (ENSMUST00000027671.11, intron 5 of 13)	-2032	ENSMUST00000188098.1	ENSMUSG00000026414	ENSMUST00000189732			Tnnt2			protein_coding
e11ve16_common_1603	chr1	135918823	135919361	+	0.0635	NA	promoter-TSS (ENSMUST00000163260.7)	protein_coding-promoter-TSS (ENSMUST00000163260.7)	28	ENSMUST00000163260.7	ENSMUSG00000026413	ENSMUST00000132793			Pkp1			protein_coding
e11ve16_common_1604	chr1	135945003	135945602	+	2.02326	NA	Intergenic	Intergenic	17838	ENSMUST00000140703.7	ENSMUSG00000051985	ENSMUST00000140703			Igfn1			protein_coding
e11ve16_common_1605	chr1	136007506	136008359	+	1.15211	NA	promoter-TSS (ENSMUST00000165125.7)	protein_coding-promoter-TSS (ENSMUST00000165125.7)	-218	ENSMUST00000165125.7	ENSMUSG00000026411	ENSMUST00000165125			Tmem9			protein_coding
e11ve16_common_1606	chr1	136017597	136018982	+	1.52222	NA	intron (ENSMUST00000117950.1, intron 1 of 5)	protein_coding-intron (ENSMUST00000063719.14, intron 1 of 5)	227	ENSMUST00000117950.1	ENSMUSG00000026411	ENSMUST00000165125			Tmem9			protein_coding
e11ve16_common_1607	chr1	136040397	136041146	+	1.8785	NA	Intergenic	Intergenic	7517	ENSMUST00000140545.1	ENSMUSG00000026411	ENSMUST00000165125			Tmem9			protein_coding
e11ve16_common_1608	chr1	136050827	136051698	+	1.11178	NA	exon (ENSMUST00000180436.1, exon 1 of 1)	protein_coding-exon (ENSMUST00000180436.1, exon 1 of 1)	458	ENSMUST00000180436.1	ENSMUSG00000097918	ENSMUST00000180436			Ascl5			protein_coding
e11ve16_common_1609	chr1	136140061	136140430	+	1.81132	NA	intron (ENSMUST00000075164.10, intron 1 of 34)	protein_coding-intron (ENSMUST00000075164.10, intron 1 of 34)	8791	ENSMUST00000122892.1	ENSMUSG00000041642	ENSMUST00000122892			Kif21b			protein_coding
e11ve16_common_1610	chr1	136219960	136220797	+	0.15349	NA	TTS (ENSMUST00000144464.6)	protein_coding-TTS (ENSMUST00000144464.6)	4304	ENSMUST00000180496.1	ENSMUSG00000097315	ENSMUST00000180496			Gm26568			lncRNA
e11ve16_common_1611	chr1	136231829	136232431	+	0.93077	NA	intron (ENSMUST00000120339.7, intron 1 of 9)	protein_coding-intron (ENSMUST00000120339.7, intron 1 of 9)	-1820	ENSMUST00000144464.6	ENSMUSG00000041605	ENSMUST00000150163			Inava			protein_coding
e11ve16_common_1612	chr1	136233678	136234023	+	1.92638	NA	intron (ENSMUST00000120339.7, intron 1 of 9)	protein_coding-intron (ENSMUST00000120339.7, intron 1 of 9)	269	ENSMUST00000153910.1	ENSMUSG00000041605	ENSMUST00000150163			Inava			protein_coding
e11ve16_common_1613	chr1	136234278	136234588	+	0.76953	NA	promoter-TSS (ENSMUST00000120339.7)	protein_coding-promoter-TSS (ENSMUST00000120339.7)	-169	ENSMUST00000120339.7	ENSMUSG00000041605	ENSMUST00000150163			Inava			protein_coding
e11ve16_common_1614	chr1	136260218	136260909	+	0.72527	NA	exon (ENSMUST00000086395.6, exon 1 of 1)	protein_coding-exon (ENSMUST00000086395.6, exon 1 of 1)	310	ENSMUST00000086395.6	ENSMUSG00000052759	ENSMUST00000086395			Gpr25			protein_coding
e11ve16_common_1615	chr1	136345601	136346683	+	0.88192	NA	promoter-TSS (ENSMUST00000048309.11)	protein_coding-promoter-TSS (ENSMUST00000048309.11)	-38	ENSMUST00000048309.11	ENSMUSG00000041570	ENSMUST00000192001			Camsap2			protein_coding
e11ve16_common_1616	chr1	136414905	136415676	+	0.82907	NA	promoter-TSS (ENSMUST00000027655.7)	protein_coding-promoter-TSS (ENSMUST00000027655.7)	19	ENSMUST00000129218.6	ENSMUSG00000026404	ENSMUST00000027655			Ddx59			protein_coding
e11ve16_common_1617	chr1	136465905	136466334	+	0.41535	NA	promoter-TSS (ENSMUST00000187963.6)	protein_coding-promoter-TSS (ENSMUST00000187963.6)	-224	ENSMUST00000187963.6	ENSMUSG00000041498	ENSMUST00000195274			Kif14			protein_coding
e11ve16_common_1618	chr1	136524545	136525175	+	0.67151	NA	TTS (ENSMUST00000190220.1)	processed_pseudogene-TTS (ENSMUST00000190220.1)	976	ENSMUST00000190220.1	ENSMUSG00000101413	ENSMUST00000190220			Gm29485			processed_pseudogene
e11ve16_common_1619	chr1	136525473	136525817	+	1.93452	NA	intron (ENSMUST00000189413.6, intron 26 of 28)	protein_coding-intron (ENSMUST00000047817.11, intron 27 of 29)	1761	ENSMUST00000190220.1	ENSMUSG00000101413	ENSMUST00000190220			Gm29485			processed_pseudogene
e11ve16_common_1620	chr1	136555812	136556264	+	0.99681	NA	TTS (ENSMUST00000194018.1)	lncRNA-TTS (ENSMUST00000194018.1)	14433	ENSMUST00000194018.1	ENSMUSG00000104414	ENSMUST00000194018			Gm37799			lncRNA
e11ve16_common_1621	chr1	136561715	136562552	+	0.70883	NA	Intergenic	Intergenic	17344	ENSMUST00000193724.1	ENSMUSG00000104509	ENSMUST00000193724			Gm33994			lncRNA
e11ve16_common_1622	chr1	136614831	136615536	+	1.04959	NA	Intergenic	Intergenic	9467	ENSMUST00000180797.1	ENSMUSG00000097229	ENSMUST00000180797			Platr23			lncRNA
e11ve16_common_1623	chr1	136624275	136624940	+	0.4443	NA	promoter-TSS (ENSMUST00000047734.14)	protein_coding-promoter-TSS (ENSMUST00000047734.14)	43	ENSMUST00000180797.1	ENSMUSG00000097229	ENSMUST00000180797			Platr23			lncRNA
e11ve16_common_1624	chr1	136625336	136625611	+	2.35347	NA	promoter-TSS (ENSMUST00000180797.1)	lncRNA-promoter-TSS (ENSMUST00000180797.1)	572	ENSMUST00000047734.14	ENSMUSG00000041483	ENSMUST00000112046			Zfp281			protein_coding
e11ve16_common_1625	chr1	136653563	136653890	+	0.17371	NA	Intergenic	Intergenic	-17043	ENSMUST00000180495.7	ENSMUSG00000097113	ENSMUST00000180962			Gm19705			lncRNA
e11ve16_common_1626	chr1	136670496	136671072	+	1.20558	NA	promoter-TSS (ENSMUST00000180495.7)	lncRNA-promoter-TSS (ENSMUST00000180495.7)	15	ENSMUST00000180495.7	ENSMUSG00000097113	ENSMUST00000180962			Gm19705			lncRNA
e11ve16_common_1627	chr1	136672299	136672557	+	2.01816	NA	intron (ENSMUST00000180495.7, intron 1 of 4)	lncRNA-intron (ENSMUST00000180495.7, intron 1 of 4)	1659	ENSMUST00000180495.7	ENSMUSG00000097113	ENSMUST00000180962			Gm19705			lncRNA
e11ve16_common_1628	chr1	136695673	136696432	+	0.22831	NA	promoter-TSS (ENSMUST00000181274.1)	lncRNA-promoter-TSS (ENSMUST00000181274.1)	-159	ENSMUST00000181274.1	ENSMUSG00000097448	ENSMUST00000181274			Platr22			lncRNA
e11ve16_common_1629	chr1	136698645	136699096	+	0.08059	NA	intron (ENSMUST00000181274.1, intron 1 of 4)	lncRNA-intron (ENSMUST00000181274.1, intron 1 of 4)	1496	ENSMUST00000175171.1	ENSMUSG00000092912	ENSMUST00000175171			Gm24086			snRNA
e11ve16_common_1630	chr1	136717661	136718518	+	0.61722	NA	intron (ENSMUST00000181274.1, intron 2 of 4)	lncRNA-intron (ENSMUST00000181274.1, intron 2 of 4)	20715	ENSMUST00000175171.1	ENSMUSG00000092912	ENSMUST00000175171			Gm24086			snRNA
e11ve16_common_1631	chr1	136768965	136769277	+	0.4143	NA	Intergenic	Intergenic	-11512	ENSMUST00000175316.2	ENSMUSG00000096432	ENSMUST00000175316			Gm22132			miRNA
e11ve16_common_1632	chr1	136781700	136782549	+	0.4835	NA	Intergenic	Intergenic	7396	ENSMUST00000193486.1	ENSMUSG00000104360	ENSMUST00000193486			Gm8762			processed_pseudogene
e11ve16_common_1633	chr1	136832481	136833107	+	0.46027	NA	Intergenic	Intergenic	-33835	ENSMUST00000195232.1	ENSMUSG00000104261	ENSMUST00000195232			Gm17781			processed_pseudogene
e11ve16_common_1634	chr1	136890541	136891040	+	0.12932	NA	exon (ENSMUST00000027649.13, exon 7 of 9)	protein_coding-exon (ENSMUST00000027649.13, exon 7 of 9)	49793	ENSMUST00000192587.1	ENSMUSG00000026398	ENSMUST00000192929			Nr5a2			protein_coding
e11ve16_common_1635	chr1	136910297	136910585	+	0.09842	NA	intron (ENSMUST00000027649.13, intron 6 of 8)	protein_coding-intron (ENSMUST00000027649.13, intron 6 of 8)	30142	ENSMUST00000192587.1	ENSMUSG00000026398	ENSMUST00000192929			Nr5a2			protein_coding
e11ve16_common_1636	chr1	136948600	136949399	+	0.24658	NA	exon (ENSMUST00000168126.6, exon 1 of 7)	protein_coding-exon (ENSMUST00000168126.6, exon 1 of 7)	174	ENSMUST00000195428.1	ENSMUSG00000026398	ENSMUST00000192929			Nr5a2			protein_coding
e11ve16_common_1637	chr1	136966509	136967181	+	0.13981	NA	Intergenic	Intergenic	-6397	ENSMUST00000027649.13	ENSMUSG00000026398	ENSMUST00000192929			Nr5a2			protein_coding
e11ve16_common_1638	chr1	137079058	137079467	+	0.59682	NA	Intergenic	Intergenic	-88992	ENSMUST00000158345.1	ENSMUSG00000088970	ENSMUST00000158345			Gm23763			snRNA
e11ve16_common_1639	chr1	137171134	137171498	+	0.26584	NA	Intergenic	Intergenic	44331	ENSMUST00000104019.1	ENSMUSG00000077207	ENSMUST00000104019			Gm25609			snRNA
e11ve16_common_1640	chr1	137222912	137223418	+	0.12584	NA	Intergenic	Intergenic	-7518	ENSMUST00000104019.1	ENSMUSG00000077207	ENSMUST00000104019			Gm25609			snRNA
e11ve16_common_1641	chr1	137280226	137281486	+	0.35706	NA	Intergenic	Intergenic	28714	ENSMUST00000192624.1	ENSMUSG00000102751	ENSMUST00000192624			Gm37057			TEC
e11ve16_common_1642	chr1	137323246	137323555	+	1.06522	NA	Intergenic	Intergenic	2442	ENSMUST00000191810.1	ENSMUSG00000102738	ENSMUST00000191810			1700006P03Rik			TEC
e11ve16_common_1643	chr1	137323958	137324433	+	0.63922	NA	Intergenic	Intergenic	1647	ENSMUST00000191810.1	ENSMUSG00000102738	ENSMUST00000191810			1700006P03Rik			TEC
e11ve16_common_1644	chr1	137473952	137475048	+	1.38779	NA	Intergenic	Intergenic	56730	ENSMUST00000192122.1	ENSMUSG00000103070	ENSMUST00000192122			Gm37903			TEC
e11ve16_common_1645	chr1	137654097	137655029	+	0.13074	NA	Intergenic	Intergenic	-79755	ENSMUST00000158090.1	ENSMUSG00000088715	ENSMUST00000158090			Gm22727			snoRNA
e11ve16_common_1646	chr1	137849465	137849847	+	0.3185	NA	Intergenic	Intergenic	37807	ENSMUST00000191658.1	ENSMUSG00000104112	ENSMUST00000191658			Gm37293			TEC
e11ve16_common_1647	chr1	137898334	137899047	+	0.75226	NA	promoter-TSS (ENSMUST00000182127.1)	lncRNA-promoter-TSS (ENSMUST00000182127.1)	92	ENSMUST00000182127.1	ENSMUSG00000098243	ENSMUST00000187561			Gm4258			lncRNA
e11ve16_common_1648	chr1	137919834	137920429	+	0.51735	NA	intron (ENSMUST00000182971.1, intron 1 of 1)	lncRNA-intron (ENSMUST00000182127.1, intron 1 of 2)	1181	ENSMUST00000182971.1	ENSMUSG00000098045	ENSMUST00000182971			Gm26979			lncRNA
e11ve16_common_1649	chr1	137928120	137928419	+	0.05726	NA	promoter-TSS (ENSMUST00000192622.1)	TEC-promoter-TSS (ENSMUST00000192622.1)	99	ENSMUST00000192622.1	ENSMUSG00000102277	ENSMUST00000192622			A130050O07Rik			TEC
e11ve16_common_1650	chr1	138028848	138029754	+	0.40479	NA	Intergenic	Intergenic	-41525	ENSMUST00000157939.1	ENSMUSG00000088564	ENSMUST00000157939			Gm23782			rRNA
e11ve16_common_1651	chr1	138044321	138044675	+	0.1193	NA	Intergenic	Intergenic	-56722	ENSMUST00000157939.1	ENSMUSG00000088564	ENSMUST00000157939			Gm23782			rRNA
e11ve16_common_1652	chr1	138328161	138328693	+	0.17626	NA	Intergenic	Intergenic	-48837	ENSMUST00000190286.1	ENSMUSG00000101793	ENSMUST00000190286			Gm28500			processed_pseudogene
e11ve16_common_1653	chr1	138487831	138488069	+	2.00965	NA	intron (ENSMUST00000027642.4, intron 7 of 7)	protein_coding-intron (ENSMUST00000027642.4, intron 7 of 7)	-27665	ENSMUST00000188729.2	ENSMUSG00000099510	ENSMUST00000188729			Gm28501			lncRNA
e11ve16_common_1654	chr1	138507612	138508116	+	0.7712	NA	intron (ENSMUST00000186017.6, intron 7 of 9)	protein_coding-intron (ENSMUST00000027642.4, intron 7 of 7)	-7751	ENSMUST00000188729.2	ENSMUSG00000099510	ENSMUST00000188729			Gm28501			lncRNA
e11ve16_common_1655	chr1	138587423	138588137	+	0.58937	NA	intron (ENSMUST00000187407.6, intron 1 of 9)	protein_coding-intron (ENSMUST00000027642.4, intron 1 of 7)	-16424	ENSMUST00000191656.1	ENSMUSG00000102448	ENSMUST00000191656			Gm37101			TEC
e11ve16_common_1656	chr1	138617452	138618407	+	0.85733	NA	intron (ENSMUST00000187407.6, intron 1 of 9)	protein_coding-intron (ENSMUST00000027642.4, intron 1 of 7)	1745	ENSMUST00000027642.4	ENSMUSG00000026393	ENSMUST00000187407			Nek7			protein_coding
e11ve16_common_1657	chr1	138618996	138619339	+	0.96316	NA	intron (ENSMUST00000187407.6, intron 1 of 9)	protein_coding-intron (ENSMUST00000027642.4, intron 1 of 7)	507	ENSMUST00000027642.4	ENSMUSG00000026393	ENSMUST00000187407			Nek7			protein_coding
e11ve16_common_1658	chr1	138619761	138620253	+	1.09648	NA	promoter-TSS (ENSMUST00000027642.4)	protein_coding-promoter-TSS (ENSMUST00000027642.4)	134	ENSMUST00000187407.6	ENSMUSG00000026393	ENSMUST00000187407			Nek7			protein_coding
e11ve16_common_1659	chr1	138767000	138767223	+	0.19341	NA	Intergenic	Intergenic	66548	ENSMUST00000192425.1	ENSMUSG00000019230	ENSMUST00000112030			Lhx9			protein_coding
e11ve16_common_1660	chr1	138835573	138835822	+	0.79266	NA	intron (ENSMUST00000019374.13, intron 3 of 4)	protein_coding-intron (ENSMUST00000019374.13, intron 3 of 4)	-2038	ENSMUST00000192425.1	ENSMUSG00000019230	ENSMUST00000112030			Lhx9			protein_coding
e11ve16_common_1661	chr1	138848247	138849074	+	1.22332	NA	promoter-TSS (ENSMUST00000046870.12)	protein_coding-promoter-TSS (ENSMUST00000046870.12)	-83	ENSMUST00000112030.8	ENSMUSG00000019230	ENSMUST00000112030			Lhx9			protein_coding
e11ve16_common_1662	chr1	138856134	138856509	+	1.2201	NA	exon (ENSMUST00000193374.1, exon 1 of 3)	protein_coding-exon (ENSMUST00000193374.1, exon 1 of 3)	526	ENSMUST00000193374.1	ENSMUSG00000079283	ENSMUST00000112025			2310009B15Rik			protein_coding
e11ve16_common_1663	chr1	138912182	138913079	+	0.06687	NA	Intergenic	Intergenic	3413	ENSMUST00000195391.1	ENSMUSG00000103850	ENSMUST00000195391			Gm3933			processed_pseudogene
e11ve16_common_1664	chr1	138929621	138929843	+	2.74245	NA	Intergenic	Intergenic	-13689	ENSMUST00000195391.1	ENSMUSG00000103850	ENSMUST00000195391			Gm3933			processed_pseudogene
e11ve16_common_1665	chr1	138963047	138964423	+	0.64209	NA	promoter-TSS (ENSMUST00000168527.7)	protein_coding-promoter-TSS (ENSMUST00000168527.7)	7	ENSMUST00000198759.4	ENSMUSG00000056268	ENSMUST00000168527			Dennd1b			protein_coding
e11ve16_common_1666	chr1	139128214	139128877	+	1.11508	NA	intron (ENSMUST00000199634.1, intron 2 of 9)	protein_coding-intron (ENSMUST00000094505.5, intron 13 of 20)	6120	ENSMUST00000129972.1	ENSMUSG00000085481	ENSMUST00000129972			Gm16304			processed_pseudogene
e11ve16_common_1667	chr1	139159619	139160211	+	1.31778	NA	intron (ENSMUST00000200429.4, intron 17 of 19)	protein_coding-intron (ENSMUST00000094505.5, intron 18 of 20)	4763	ENSMUST00000191655.1	ENSMUSG00000102243	ENSMUST00000191655			Gm37718			TEC
e11ve16_common_1668	chr1	139267995	139268424	+	0.36225	NA	intron (ENSMUST00000198445.4, intron 4 of 9)	protein_coding-intron (ENSMUST00000059825.11, intron 5 of 11)	-12447	ENSMUST00000199291.1	ENSMUSG00000063681	ENSMUST00000059825			Crb1			protein_coding
e11ve16_common_1669	chr1	139376871	139377096	+	2.24935	NA	promoter-TSS (ENSMUST00000059825.11)	protein_coding-promoter-TSS (ENSMUST00000059825.11)	58	ENSMUST00000196402.4	ENSMUSG00000063681	ENSMUST00000059825			Crb1			protein_coding
e11ve16_common_1670	chr1	139379266	139379683	+	0.05823	NA	promoter-TSS (ENSMUST00000192824.1)	lncRNA-promoter-TSS (ENSMUST00000192824.1)	22	ENSMUST00000192824.1	ENSMUSG00000103844	ENSMUST00000192824			4933436E23Rik			lncRNA
e11ve16_common_1671	chr1	139421728	139422117	+	0.7807	NA	promoter-TSS (ENSMUST00000039867.9)	protein_coding-promoter-TSS (ENSMUST00000039867.9)	-366	ENSMUST00000200243.4	ENSMUSG00000033964	ENSMUST00000199011			Zbtb41			protein_coding
e11ve16_common_1672	chr1	139422499	139423296	+	0.61397	NA	promoter-TSS (ENSMUST00000199011.1)	protein_coding-promoter-TSS (ENSMUST00000199011.1)	515	ENSMUST00000039867.9	ENSMUSG00000033964	ENSMUST00000199011			Zbtb41			protein_coding
e11ve16_common_1673	chr1	139454206	139455483	+	1.05667	NA	promoter-TSS (ENSMUST00000053364.11)	protein_coding-promoter-TSS (ENSMUST00000053364.11)	25	ENSMUST00000197096.1	ENSMUSG00000033952	ENSMUST00000197096			Aspm			protein_coding
e11ve16_common_1674	chr1	140245170	140245756	+	0.91335	NA	promoter-TSS (ENSMUST00000119786.7)	protein_coding-promoter-TSS (ENSMUST00000119786.7)	-695	ENSMUST00000120709.7	ENSMUSG00000052726	ENSMUST00000193606			Kcnt2			protein_coding
e11ve16_common_1675	chr1	140531476	140531687	+	0.04116	NA	intron (ENSMUST00000120796.7, intron 20 of 27)	protein_coding-intron (ENSMUST00000119786.7, intron 18 of 26)	18625	ENSMUST00000193606.1	ENSMUSG00000052726	ENSMUST00000193606			Kcnt2			protein_coding
e11ve16_common_1676	chr1	140661183	140661828	+	0.05369	NA	Intergenic	Intergenic	-5101	ENSMUST00000193820.1	ENSMUSG00000102368	ENSMUST00000193820			4930590L20Rik			lncRNA
e11ve16_common_1677	chr1	142063741	142064568	+	0.26286	NA	Intergenic	Intergenic	391660	ENSMUST00000191024.2	ENSMUSG00000099671	ENSMUST00000191024			Gm18183			processed_pseudogene
e11ve16_common_1678	chr1	142108613	142109016	+	0.98292	NA	Intergenic	Intergenic	347000	ENSMUST00000191024.2	ENSMUSG00000099671	ENSMUST00000191024			Gm18183			processed_pseudogene
e11ve16_common_1679	chr1	142109140	142109717	+	0.81566	NA	Intergenic	Intergenic	346386	ENSMUST00000191024.2	ENSMUSG00000099671	ENSMUST00000191024			Gm18183			processed_pseudogene
e11ve16_common_1680	chr1	142742120	142742717	+	0.41821	NA	Intergenic	Intergenic	-12775	ENSMUST00000195327.1	ENSMUSG00000102818	ENSMUST00000195327			Gm37796			TEC
e11ve16_common_1681	chr1	143666920	143667355	+	0.85593	NA	intron (ENSMUST00000212510.1, intron 10 of 10)	protein_coding-intron (ENSMUST00000018337.8, intron 10 of 16)	-16093	ENSMUST00000161973.1	ENSMUSG00000089640	ENSMUST00000161973			Gm6397			processed_pseudogene
e11ve16_common_1682	chr1	143702177	143703534	+	0.70542	NA	promoter-TSS (ENSMUST00000018337.8)	protein_coding-promoter-TSS (ENSMUST00000018337.8)	38	ENSMUST00000018337.8	ENSMUSG00000026361	ENSMUST00000162638			Cdc73			protein_coding
e11ve16_common_1683	chr1	143709172	143709646	+	1.16824	NA	Intergenic	Intergenic	-6516	ENSMUST00000018337.8	ENSMUSG00000026361	ENSMUST00000162638			Cdc73			protein_coding
e11ve16_common_1684	chr1	143709825	143710214	+	1.29943	NA	Intergenic	Intergenic	-6319	ENSMUST00000185367.1	ENSMUSG00000018196	ENSMUST00000185367			Glrx2			protein_coding
e11ve16_common_1685	chr1	143727400	143728309	+	1.39497	NA	intron (ENSMUST00000185367.1, intron 5 of 9)	protein_coding-intron (ENSMUST00000185367.1, intron 5 of 9)	-11175	ENSMUST00000145969.7	ENSMUSG00000018196	ENSMUST00000185367			Glrx2			protein_coding
e11ve16_common_1686	chr1	143739617	143740338	+	0.45365	NA	promoter-TSS (ENSMUST00000129653.2)	protein_coding-promoter-TSS (ENSMUST00000129653.2)	331	ENSMUST00000050491.10	ENSMUSG00000018196	ENSMUST00000185367			Glrx2			protein_coding
e11ve16_common_1687	chr1	143770314	143770540	+	1.50186	NA	exon (ENSMUST00000018343.9, exon 1 of 7)	protein_coding-exon (ENSMUST00000018343.9, exon 1 of 7)	599	ENSMUST00000018343.9	ENSMUSG00000018199	ENSMUST00000159879			Ro60			protein_coding
e11ve16_common_1688	chr1	143770719	143771231	+	0.60705	NA	promoter-TSS (ENSMUST00000018343.9)	protein_coding-promoter-TSS (ENSMUST00000018343.9)	51	ENSMUST00000018343.9	ENSMUSG00000018199	ENSMUST00000159879			Ro60			protein_coding
e11ve16_common_1689	chr1	143776574	143776792	+	0.44688	NA	promoter-TSS (ENSMUST00000018333.12)	protein_coding-promoter-TSS (ENSMUST00000018333.12)	385	ENSMUST00000159879.1	ENSMUSG00000018199	ENSMUST00000159879			Ro60			protein_coding
e11ve16_common_1690	chr1	143777503	143778047	+	0.58188	NA	promoter-TSS (ENSMUST00000159879.1)	protein_coding-promoter-TSS (ENSMUST00000159879.1)	133	ENSMUST00000190224.1	ENSMUSG00000100455	ENSMUST00000190224			Gm29170			lncRNA
e11ve16_common_1691	chr1	143813858	143814347	+	0.11833	NA	Intergenic	Intergenic	19385	ENSMUST00000185539.1	ENSMUSG00000018189	ENSMUST00000190258			Uchl5			protein_coding
e11ve16_common_1692	chr1	143820585	143820826	+	1.82305	NA	Intergenic	Intergenic	25988	ENSMUST00000185539.1	ENSMUSG00000018189	ENSMUST00000190258			Uchl5			protein_coding
e11ve16_common_1693	chr1	143904659	143904928	+	0.38635	NA	Intergenic	Intergenic	99239	ENSMUST00000153527.2	ENSMUSG00000026360	ENSMUST00000127206			Rgs2			protein_coding
e11ve16_common_1694	chr1	144003533	144003999	+	0.81103	NA	intron (ENSMUST00000027606.3, intron 1 of 3)	protein_coding-intron (ENSMUST00000027606.3, intron 1 of 3)	266	ENSMUST00000153527.2	ENSMUSG00000026360	ENSMUST00000127206			Rgs2			protein_coding
e11ve16_common_1695	chr1	144004654	144004995	+	0.51212	NA	promoter-TSS (ENSMUST00000027606.3)	protein_coding-promoter-TSS (ENSMUST00000027606.3)	-663	ENSMUST00000127206.7	ENSMUSG00000026360	ENSMUST00000127206			Rgs2			protein_coding
e11ve16_common_1696	chr1	144018721	144018944	+	2.34752	NA	Intergenic	Intergenic	-14671	ENSMUST00000127206.7	ENSMUSG00000026360	ENSMUST00000127206			Rgs2			protein_coding
e11ve16_common_1697	chr1	144197677	144198271	+	0.0384	NA	Intergenic	Intergenic	-20602	ENSMUST00000052375.7	ENSMUSG00000051079	ENSMUST00000111941			Rgs13			protein_coding
e11ve16_common_1698	chr1	144406379	144407237	+	0.13135	NA	Intergenic	Intergenic	-94372	ENSMUST00000187999.1	ENSMUSG00000100441	ENSMUST00000187999			Gm7266			processed_pseudogene
e11ve16_common_1699	chr1	145018848	145019376	+	1.08288	NA	Intergenic	Intergenic	-39527	ENSMUST00000177687.1	ENSMUSG00000096352	ENSMUST00000177687			Gm25708			miRNA
e11ve16_common_1700	chr1	146357175	146357778	+	0.23274	NA	Intergenic	Intergenic	-62960	ENSMUST00000163646.2	ENSMUSG00000090323	ENSMUST00000163646			Gm5263			processed_pseudogene
e11ve16_common_1701	chr1	146442704	146443170	+	0.32749	NA	intron (ENSMUST00000186665.6, intron 2 of 6)	lncRNA-intron (ENSMUST00000185686.1, intron 1 of 3)	22501	ENSMUST00000163646.2	ENSMUSG00000090323	ENSMUST00000163646			Gm5263			processed_pseudogene
e11ve16_common_1702	chr1	146497469	146498926	+	0.85177	NA	intron (ENSMUST00000125331.1, intron 1 of 2)	protein_coding-intron (ENSMUST00000074622.10, intron 1 of 7)	459	ENSMUST00000125331.1	ENSMUSG00000035131	ENSMUST00000128345			Brinp3			protein_coding
e11ve16_common_1703	chr1	148579883	148580340	+	1.01853	NA	Intergenic	Intergenic	71023	ENSMUST00000187360.1	ENSMUSG00000101735	ENSMUST00000187360			Gm18505			processed_pseudogene
e11ve16_common_1704	chr1	149712532	149712992	+	0.78614	NA	Intergenic	Intergenic	-5280	ENSMUST00000157542.1	ENSMUSG00000088167	ENSMUST00000157542			Gm23535			snRNA
e11ve16_common_1705	chr1	149758256	149758760	+	0.10307	NA	Intergenic	Intergenic	-23650	ENSMUST00000122583.1	ENSMUSG00000084532	ENSMUST00000122583			n-R5s218			rRNA
e11ve16_common_1706	chr1	149912901	149913721	+	0.47775	NA	intron (ENSMUST00000190507.1, intron 2 of 5)	protein_coding-intron (ENSMUST00000070200.14, intron 3 of 17)	9128	ENSMUST00000111926.8	ENSMUSG00000056220	ENSMUST00000070200			Pla2g4a			protein_coding
e11ve16_common_1707	chr1	149921327	149922725	+	0.56624	NA	exon (ENSMUST00000142040.1, exon 3 of 3)	protein_coding-exon (ENSMUST00000142040.1, exon 3 of 3)	413	ENSMUST00000111926.8	ENSMUSG00000056220	ENSMUST00000070200			Pla2g4a			protein_coding
e11ve16_common_1708	chr1	149960717	149961015	+	0.49259	NA	intron (ENSMUST00000070200.14, intron 1 of 17)	protein_coding-intron (ENSMUST00000070200.14, intron 1 of 17)	389	ENSMUST00000134676.1	ENSMUSG00000056220	ENSMUST00000070200			Pla2g4a			protein_coding
e11ve16_common_1709	chr1	149961251	149961677	+	0.47812	NA	promoter-TSS (ENSMUST00000070200.14)	protein_coding-promoter-TSS (ENSMUST00000070200.14)	-174	ENSMUST00000070200.14	ENSMUSG00000056220	ENSMUST00000070200			Pla2g4a			protein_coding
e11ve16_common_1710	chr1	150099426	150100377	+	0.8583	NA	promoter-TSS (ENSMUST00000035065.8)	protein_coding-promoter-TSS (ENSMUST00000035065.8)	62	ENSMUST00000181460.2	ENSMUSG00000097028	ENSMUST00000181915			Ptgs2os			lncRNA
e11ve16_common_1711	chr1	150115622	150115831	+	1.27844	NA	Intergenic	Intergenic	15394	ENSMUST00000190784.1	ENSMUSG00000032487	ENSMUST00000190784			Ptgs2			protein_coding
e11ve16_common_1712	chr1	150266319	150267092	+	0.34939	NA	promoter-TSS (ENSMUST00000121422.1)	processed_pseudogene-promoter-TSS (ENSMUST00000121422.1)	-706	ENSMUST00000121422.1	ENSMUSG00000099875	ENSMUST00000121422			Rbm3-ps			processed_pseudogene
e11ve16_common_1713	chr1	150392484	150392695	+	0.49845	NA	promoter-TSS (ENSMUST00000119161.8)	protein_coding-promoter-TSS (ENSMUST00000119161.8)	130	ENSMUST00000006167.12	ENSMUSG00000006010	ENSMUST00000148389			Odr4			protein_coding
e11ve16_common_1714	chr1	150393458	150393888	+	0.60854	NA	promoter-TSS (ENSMUST00000006167.12)	protein_coding-promoter-TSS (ENSMUST00000006167.12)	289	ENSMUST00000131701.1	ENSMUSG00000006005	ENSMUST00000124484			Tpr			protein_coding
e11ve16_common_1715	chr1	150771115	150771529	+	0.12479	NA	intron (ENSMUST00000137197.8, intron 13 of 105)	protein_coding-intron (ENSMUST00000074783.11, intron 13 of 106)	146023	ENSMUST00000177268.1	ENSMUSG00000093650	ENSMUST00000177268			Gm20631			lncRNA
e11ve16_common_1716	chr1	150804623	150805155	+	0.49811	NA	intron (ENSMUST00000074783.11, intron 9 of 106)	protein_coding-intron (ENSMUST00000074783.11, intron 9 of 106)	179590	ENSMUST00000177268.1	ENSMUSG00000093650	ENSMUST00000177268			Gm20631			lncRNA
e11ve16_common_1717	chr1	150866713	150867005	+	0.05084	NA	intron (ENSMUST00000074783.11, intron 2 of 106)	protein_coding-intron (ENSMUST00000074783.11, intron 2 of 106)	126192	ENSMUST00000074783.11	ENSMUSG00000066842	ENSMUST00000137197			Hmcn1			protein_coding
e11ve16_common_1718	chr1	150897767	150898576	+	1.96066	NA	intron (ENSMUST00000074783.11, intron 1 of 106)	protein_coding-intron (ENSMUST00000074783.11, intron 1 of 106)	94880	ENSMUST00000074783.11	ENSMUSG00000066842	ENSMUST00000137197			Hmcn1			protein_coding
e11ve16_common_1719	chr1	150976403	150976705	+	0.06016	NA	intron (ENSMUST00000074783.11, intron 1 of 106)	protein_coding-intron (ENSMUST00000074783.11, intron 1 of 106)	16497	ENSMUST00000074783.11	ENSMUSG00000066842	ENSMUST00000137197			Hmcn1			protein_coding
e11ve16_common_1720	chr1	150991900	150992370	+	1.20776	NA	intron (ENSMUST00000074783.11, intron 1 of 106)	protein_coding-intron (ENSMUST00000074783.11, intron 1 of 106)	916	ENSMUST00000074783.11	ENSMUSG00000066842	ENSMUST00000137197			Hmcn1			protein_coding
e11ve16_common_1721	chr1	150992587	150993843	+	0.93222	NA	promoter-TSS (ENSMUST00000074783.11)	protein_coding-promoter-TSS (ENSMUST00000074783.11)	-164	ENSMUST00000137197.8	ENSMUSG00000066842	ENSMUST00000137197			Hmcn1			protein_coding
e11ve16_common_1722	chr1	151000440	151001153	+	1.50179	NA	promoter-TSS (ENSMUST00000191173.1)	lncRNA-promoter-TSS (ENSMUST00000191173.1)	-244	ENSMUST00000191173.1	ENSMUSG00000099622	ENSMUST00000191173			Gm29188			lncRNA
e11ve16_common_1723	chr1	151009353	151009840	+	0.02493	NA	Intergenic	Intergenic	8556	ENSMUST00000191173.1	ENSMUSG00000099622	ENSMUST00000191173			Gm29188			lncRNA
e11ve16_common_1724	chr1	151024462	151025754	+	0.40988	NA	Intergenic	Intergenic	24068	ENSMUST00000191173.1	ENSMUSG00000099622	ENSMUST00000191173			Gm29188			lncRNA
e11ve16_common_1725	chr1	151035196	151035419	+	0.45122	NA	Intergenic	Intergenic	26803	ENSMUST00000180118.1	ENSMUSG00000096851	ENSMUST00000180118			Gm22756			snRNA
e11ve16_common_1726	chr1	151064535	151065848	+	0.19576	NA	Intergenic	Intergenic	-3081	ENSMUST00000180118.1	ENSMUSG00000096851	ENSMUST00000180118			Gm22756			snRNA
e11ve16_common_1727	chr1	151131507	151131995	+	0.23766	NA	Intergenic	Intergenic	-4756	ENSMUST00000181451.1	ENSMUSG00000097426	ENSMUST00000181451			Gm8941			processed_pseudogene
e11ve16_common_1728	chr1	151235769	151236830	+	0.39079	NA	Intergenic	Intergenic	24615	ENSMUST00000157873.1	ENSMUSG00000088498	ENSMUST00000157873			Gm24402			snRNA
e11ve16_common_1729	chr1	151251473	151251911	+	1.57563	NA	Intergenic	Intergenic	9222	ENSMUST00000157873.1	ENSMUSG00000088498	ENSMUST00000157873			Gm24402			snRNA
e11ve16_common_1730	chr1	151252034	151252703	+	1.19871	NA	Intergenic	Intergenic	8546	ENSMUST00000157873.1	ENSMUSG00000088498	ENSMUST00000157873			Gm24402			snRNA
e11ve16_common_1731	chr1	151258180	151259465	+	1.05682	NA	Intergenic	Intergenic	2092	ENSMUST00000157873.1	ENSMUSG00000088498	ENSMUST00000157873			Gm24402			snRNA
e11ve16_common_1732	chr1	151344165	151344781	+	1.36149	NA	promoter-TSS (ENSMUST00000023918.12)	protein_coding-promoter-TSS (ENSMUST00000023918.12)	-4	ENSMUST00000023918.12	ENSMUSG00000023150	ENSMUST00000023918			Ivns1abp			protein_coding
e11ve16_common_1733	chr1	151345190	151345402	+	1.84396	NA	promoter-TSS (ENSMUST00000186597.1)	lncRNA-promoter-TSS (ENSMUST00000186597.1)	-65	ENSMUST00000186597.1	ENSMUSG00000100954	ENSMUST00000185848			Gm10138			lncRNA
e11ve16_common_1734	chr1	151428342	151429163	+	1.02846	NA	promoter-TSS (ENSMUST00000064771.11)	protein_coding-promoter-TSS (ENSMUST00000064771.11)	46	ENSMUST00000189655.1	ENSMUSG00000053286	ENSMUST00000188179			Trmt1l			protein_coding
e11ve16_common_1735	chr1	151500220	151501360	+	0.76837	NA	promoter-TSS (ENSMUST00000186415.6)	protein_coding-promoter-TSS (ENSMUST00000186415.6)	4	ENSMUST00000187991.1	ENSMUSG00000026484	ENSMUST00000188871			Rnf2			protein_coding
e11ve16_common_1736	chr1	151571355	151572436	+	0.35982	NA	intron (ENSMUST00000134499.7, intron 2 of 4)	protein_coding-intron (ENSMUST00000097541.9, intron 1 of 14)	399	ENSMUST00000111875.1	ENSMUSG00000026483	ENSMUST00000086267			Fam129a			protein_coding
e11ve16_common_1737	chr1	151619021	151619236	+	0.27869	NA	intron (ENSMUST00000134499.7, intron 2 of 4)	protein_coding-intron (ENSMUST00000097541.9, intron 1 of 14)	47632	ENSMUST00000111875.1	ENSMUSG00000026483	ENSMUST00000086267			Fam129a			protein_coding
e11ve16_common_1738	chr1	151631639	151631856	+	1.25795	NA	intron (ENSMUST00000134499.7, intron 2 of 4)	protein_coding-intron (ENSMUST00000097541.9, intron 1 of 14)	-45420	ENSMUST00000086267.5	ENSMUSG00000026483	ENSMUST00000086267			Fam129a			protein_coding
e11ve16_common_1739	chr1	151632045	151632298	+	2.02526	NA	intron (ENSMUST00000134499.7, intron 2 of 4)	protein_coding-intron (ENSMUST00000097541.9, intron 1 of 14)	-44996	ENSMUST00000086267.5	ENSMUSG00000026483	ENSMUST00000086267			Fam129a			protein_coding
e11ve16_common_1740	chr1	151664753	151665081	+	0.75129	NA	intron (ENSMUST00000148810.7, intron 5 of 13)	protein_coding-intron (ENSMUST00000097541.9, intron 5 of 14)	-12250	ENSMUST00000086267.5	ENSMUSG00000026483	ENSMUST00000086267			Fam129a			protein_coding
e11ve16_common_1741	chr1	151665333	151665663	+	2.19628	NA	intron (ENSMUST00000148810.7, intron 5 of 13)	protein_coding-intron (ENSMUST00000097541.9, intron 5 of 14)	-11669	ENSMUST00000086267.5	ENSMUSG00000026483	ENSMUST00000086267			Fam129a			protein_coding
e11ve16_common_1742	chr1	151706190	151706449	+	0.60924	NA	intron (ENSMUST00000148810.7, intron 11 of 13)	protein_coding-intron (ENSMUST00000086267.5, intron 7 of 9)	29152	ENSMUST00000086267.5	ENSMUSG00000026483	ENSMUST00000086267			Fam129a			protein_coding
e11ve16_common_1743	chr1	151708996	151709273	+	0.58062	NA	exon (ENSMUST00000086267.5, exon 8 of 10)	protein_coding-exon (ENSMUST00000086267.5, exon 8 of 10)	31967	ENSMUST00000086267.5	ENSMUSG00000026483	ENSMUST00000086267			Fam129a			protein_coding
e11ve16_common_1744	chr1	151754825	151756034	+	0.9061	NA	promoter-TSS (ENSMUST00000059498.11)	protein_coding-promoter-TSS (ENSMUST00000059498.11)	-31	ENSMUST00000187951.6	ENSMUSG00000043019	ENSMUST00000059498			Edem3			protein_coding
e11ve16_common_1745	chr1	151861722	151862047	+	0.50606	NA	intron (ENSMUST00000187603.6, intron 6 of 6)	protein_coding-intron (ENSMUST00000187603.6, intron 6 of 6)	-6929	ENSMUST00000122608.1	ENSMUSG00000084557	ENSMUST00000122608			Gm25279			snRNA
e11ve16_common_1746	chr1	152049760	152050022	+	0.15652	NA	intron (ENSMUST00000187603.6, intron 1 of 6)	protein_coding-intron (ENSMUST00000044581.13, intron 1 of 5)	5401	ENSMUST00000121533.2	ENSMUSG00000032666	ENSMUST00000187603			1700025G04Rik			protein_coding
e11ve16_common_1747	chr1	152084599	152085099	+	0.10755	NA	intron (ENSMUST00000187603.6, intron 1 of 6)	protein_coding-intron (ENSMUST00000044581.13, intron 1 of 5)	5121	ENSMUST00000187603.6	ENSMUSG00000032666	ENSMUST00000187603			1700025G04Rik			protein_coding
e11ve16_common_1748	chr1	152089333	152090842	+	1.85346	NA	promoter-TSS (ENSMUST00000044581.13)	protein_coding-promoter-TSS (ENSMUST00000044581.13)	38	ENSMUST00000044581.13	ENSMUSG00000032666	ENSMUST00000187603			1700025G04Rik			protein_coding
e11ve16_common_1749	chr1	152255483	152255814	+	0.48322	NA	Intergenic	Intergenic	36880	ENSMUST00000194334.1	ENSMUSG00000103744	ENSMUST00000194334			Gm38238			TEC
e11ve16_common_1750	chr1	152258527	152258740	+	1.32821	NA	Intergenic	Intergenic	33895	ENSMUST00000194334.1	ENSMUSG00000103744	ENSMUST00000194334			Gm38238			TEC
e11ve16_common_1751	chr1	152386160	152387101	+	0.29418	NA	promoter-TSS (ENSMUST00000015124.14)	protein_coding-promoter-TSS (ENSMUST00000015124.14)	-10	ENSMUST00000188105.1	ENSMUSG00000014980	ENSMUST00000159717			Tsen15			protein_coding
e11ve16_common_1752	chr1	152399809	152401261	+	0.71778	NA	intron (ENSMUST00000127586.7, intron 1 of 13)	protein_coding-intron (ENSMUST00000044311.8, intron 1 of 11)	705	ENSMUST00000127586.7	ENSMUSG00000032649	ENSMUST00000044311			Colgalt2			protein_coding
e11ve16_common_1753	chr1	152456246	152457167	+	0.38045	NA	intron (ENSMUST00000127586.7, intron 1 of 13)	protein_coding-intron (ENSMUST00000044311.8, intron 1 of 11)	-49181	ENSMUST00000121610.1	ENSMUSG00000080878	ENSMUST00000121610			Gm15618			processed_pseudogene
e11ve16_common_1754	chr1	152556021	152556488	+	1.66095	NA	intron (ENSMUST00000111857.2, intron 5 of 17)	protein_coding-intron (ENSMUST00000027760.13, intron 5 of 17)	-3210	ENSMUST00000188395.1	ENSMUSG00000026482	ENSMUST00000149536			Rgl1			protein_coding
e11ve16_common_1755	chr1	152556612	152556921	+	0.9932	NA	TTS (ENSMUST00000128251.7)	protein_coding-TTS (ENSMUST00000128251.7)	-3722	ENSMUST00000188395.1	ENSMUSG00000026482	ENSMUST00000149536			Rgl1			protein_coding
e11ve16_common_1756	chr1	152625214	152625601	+	2.09293	NA	promoter-TSS (ENSMUST00000027760.13)	protein_coding-promoter-TSS (ENSMUST00000027760.13)	-190	ENSMUST00000027760.13	ENSMUSG00000026482	ENSMUST00000149536			Rgl1			protein_coding
e11ve16_common_1757	chr1	152689856	152690330	+	1.31235	NA	intron (ENSMUST00000111859.7, intron 1 of 18)	protein_coding-intron (ENSMUST00000111857.2, intron 1 of 17)	-2592	ENSMUST00000139309.1	ENSMUSG00000086145	ENSMUST00000139309			Gm15479			lncRNA
e11ve16_common_1758	chr1	152717525	152717792	+	0.04538	NA	intron (ENSMUST00000111859.7, intron 1 of 18)	protein_coding-intron (ENSMUST00000111857.2, intron 1 of 17)	12901	ENSMUST00000119836.1	ENSMUSG00000080950	ENSMUST00000119836			Gm7278			processed_pseudogene
e11ve16_common_1759	chr1	152765944	152767146	+	0.27862	NA	promoter-TSS (ENSMUST00000077755.10)	protein_coding-promoter-TSS (ENSMUST00000077755.10)	3	ENSMUST00000097536.5	ENSMUSG00000008475	ENSMUST00000143008			Arpc5			protein_coding
e11ve16_common_1760	chr1	152790378	152791136	+	1.41148	NA	Intergenic	Intergenic	-9437	ENSMUST00000186568.6	ENSMUSG00000026480	ENSMUST00000187641			Ncf2			protein_coding
e11ve16_common_1761	chr1	152815215	152815850	+	0.26589	NA	intron (ENSMUST00000186568.6, intron 3 of 15)	protein_coding-intron (ENSMUST00000027754.6, intron 2 of 14)	4642	ENSMUST00000189135.1	ENSMUSG00000026480	ENSMUST00000187641			Ncf2			protein_coding
e11ve16_common_1762	chr1	152902449	152903794	+	1.77644	NA	promoter-TSS (ENSMUST00000073441.12)	protein_coding-promoter-TSS (ENSMUST00000073441.12)	-475	ENSMUST00000111836.3	ENSMUSG00000042772	ENSMUST00000043560			Smg7			protein_coding
e11ve16_common_1763	chr1	152955866	152956448	+	0.57136	NA	intron (ENSMUST00000185241.1, intron 1 of 4)	protein_coding-intron (ENSMUST00000043313.14, intron 1 of 10)	883	ENSMUST00000185241.1	ENSMUSG00000042751	ENSMUST00000186621			Nmnat2			protein_coding
e11ve16_common_1764	chr1	153040124	153040676	+	0.7023	NA	intron (ENSMUST00000187569.1, intron 1 of 1)	protein_coding-intron (ENSMUST00000043313.14, intron 1 of 10)	7026	ENSMUST00000187569.1	ENSMUSG00000042751	ENSMUST00000186621			Nmnat2			protein_coding
e11ve16_common_1765	chr1	153091594	153092467	+	0.52179	NA	intron (ENSMUST00000186621.1, intron 8 of 8)	protein_coding-intron (ENSMUST00000043313.14, intron 7 of 10)	-1450	ENSMUST00000190960.1	ENSMUSG00000042751	ENSMUST00000186621			Nmnat2			protein_coding
e11ve16_common_1766	chr1	153096198	153096704	+	0.59771	NA	intron (ENSMUST00000186368.6, intron 8 of 11)	protein_coding-intron (ENSMUST00000043313.14, intron 8 of 10)	2971	ENSMUST00000190960.1	ENSMUSG00000042751	ENSMUST00000186621			Nmnat2			protein_coding
e11ve16_common_1767	chr1	153134226	153135084	+	0.20951	NA	intron (ENSMUST00000185356.6, intron 15 of 22)	protein_coding-intron (ENSMUST00000027753.12, intron 16 of 23)	-7421	ENSMUST00000189005.1	ENSMUSG00000026479	ENSMUST00000189005			Lamc2			protein_coding
e11ve16_common_1768	chr1	153140427	153141010	+	0.61804	NA	intron (ENSMUST00000027753.12, intron 12 of 23)	protein_coding-intron (ENSMUST00000027753.12, intron 12 of 23)	11368	ENSMUST00000185328.1	ENSMUSG00000026479	ENSMUST00000189005			Lamc2			protein_coding
e11ve16_common_1769	chr1	153141143	153141470	+	0.9832	NA	intron (ENSMUST00000027753.12, intron 12 of 23)	protein_coding-intron (ENSMUST00000027753.12, intron 12 of 23)	10780	ENSMUST00000185328.1	ENSMUSG00000026479	ENSMUST00000189005			Lamc2			protein_coding
e11ve16_common_1770	chr1	153172045	153173281	+	0.51743	NA	intron (ENSMUST00000027753.12, intron 2 of 23)	protein_coding-intron (ENSMUST00000027753.12, intron 2 of 23)	13384	ENSMUST00000185356.6	ENSMUSG00000026479	ENSMUST00000189005			Lamc2			protein_coding
e11ve16_common_1771	chr1	153185581	153186616	+	0.77326	NA	promoter-TSS (ENSMUST00000185356.6)	protein_coding-promoter-TSS (ENSMUST00000185356.6)	-51	ENSMUST00000185356.6	ENSMUSG00000026479	ENSMUST00000189005			Lamc2			protein_coding
e11ve16_common_1772	chr1	153265299	153265648	+	0.41405	NA	intron (ENSMUST00000027752.14, intron 1 of 27)	protein_coding-intron (ENSMUST00000027752.14, intron 1 of 27)	-15012	ENSMUST00000159251.1	ENSMUSG00000026478	ENSMUST00000027752			Lamc1			protein_coding
e11ve16_common_1773	chr1	153273973	153275149	+	0.69075	NA	intron (ENSMUST00000027752.14, intron 1 of 27)	protein_coding-intron (ENSMUST00000027752.14, intron 1 of 27)	12629	ENSMUST00000194884.1	ENSMUSG00000103818	ENSMUST00000194884			Gm38009			TEC
e11ve16_common_1774	chr1	153320473	153320674	+	1.06156	NA	intron (ENSMUST00000027752.14, intron 1 of 27)	protein_coding-intron (ENSMUST00000027752.14, intron 1 of 27)	12213	ENSMUST00000027752.14	ENSMUSG00000026478	ENSMUST00000027752			Lamc1			protein_coding
e11ve16_common_1775	chr1	153321060	153322155	+	0.2247	NA	intron (ENSMUST00000027752.14, intron 1 of 27)	protein_coding-intron (ENSMUST00000027752.14, intron 1 of 27)	11179	ENSMUST00000027752.14	ENSMUSG00000026478	ENSMUST00000027752			Lamc1			protein_coding
e11ve16_common_1776	chr1	153331977	153333677	+	0.51702	NA	promoter-TSS (ENSMUST00000027752.14)	protein_coding-promoter-TSS (ENSMUST00000027752.14)	-41	ENSMUST00000027752.14	ENSMUSG00000026478	ENSMUST00000027752			Lamc1			protein_coding
e11ve16_common_1777	chr1	153354686	153355343	+	0.47035	NA	Intergenic	Intergenic	-22228	ENSMUST00000027752.14	ENSMUSG00000026478	ENSMUST00000027752			Lamc1			protein_coding
e11ve16_common_1778	chr1	153378549	153379093	+	0.59379	NA	Intergenic	Intergenic	28969	ENSMUST00000186785.6	ENSMUSG00000073538	ENSMUST00000097535			E330020D12Rik			lncRNA
e11ve16_common_1779	chr1	153386466	153386892	+	0.48175	NA	Intergenic	Intergenic	21111	ENSMUST00000186785.6	ENSMUSG00000073538	ENSMUST00000097535			E330020D12Rik			lncRNA
e11ve16_common_1780	chr1	153415977	153416481	+	0.09951	NA	Intergenic	Intergenic	-1996	ENSMUST00000188717.1	ENSMUSG00000073538	ENSMUST00000097535			E330020D12Rik			lncRNA
e11ve16_common_1781	chr1	153425044	153425475	+	0.679	NA	promoter-TSS (ENSMUST00000042373.11)	protein_coding-promoter-TSS (ENSMUST00000042373.11)	87	ENSMUST00000136614.1	ENSMUSG00000042708	ENSMUST00000136614			Shcbp1l			protein_coding
e11ve16_common_1782	chr1	153480550	153481380	+	0.22959	NA	promoter-TSS (ENSMUST00000190383.1)	protein_coding-promoter-TSS (ENSMUST00000190383.1)	-415	ENSMUST00000190383.1	ENSMUSG00000042699	ENSMUST00000189425			Dhx9			protein_coding
e11ve16_common_1783	chr1	153487137	153487837	+	1.1083	NA	intron (ENSMUST00000186966.6, intron 1 of 19)	protein_coding-intron (ENSMUST00000042141.11, intron 1 of 27)	121	ENSMUST00000186380.6	ENSMUSG00000042699	ENSMUST00000189425			Dhx9			protein_coding
e11ve16_common_1784	chr1	153531993	153532790	+	1.20507	NA	intron (ENSMUST00000041874.8, intron 4 of 11)	protein_coding-intron (ENSMUST00000041874.8, intron 4 of 11)	17320	ENSMUST00000187747.1	ENSMUSG00000042684	ENSMUST00000187747			Npl			protein_coding
e11ve16_common_1785	chr1	153549474	153550051	+	0.08342	NA	promoter-TSS (ENSMUST00000187747.1)	protein_coding-promoter-TSS (ENSMUST00000187747.1)	-51	ENSMUST00000187747.1	ENSMUSG00000042684	ENSMUST00000187747			Npl			protein_coding
e11ve16_common_1786	chr1	153585724	153585958	+	1.81795	NA	Intergenic	Intergenic	34832	ENSMUST00000186414.1	ENSMUSG00000099858	ENSMUST00000186414			Gm6652			processed_pseudogene
e11ve16_common_1787	chr1	153641892	153642414	+	1.72393	NA	Intergenic	Intergenic	-10872	ENSMUST00000041776.11	ENSMUSG00000042671	ENSMUST00000111814			Rgs8			protein_coding
e11ve16_common_1788	chr1	153661293	153662085	+	0.59908	NA	intron (ENSMUST00000124500.7, intron 1 of 5)	protein_coding-intron (ENSMUST00000041776.11, intron 1 of 6)	608	ENSMUST00000124500.7	ENSMUSG00000042671	ENSMUST00000111814			Rgs8			protein_coding
e11ve16_common_1789	chr1	153679208	153679924	+	0.78463	NA	intron (ENSMUST00000111814.7, intron 4 of 5)	protein_coding-intron (ENSMUST00000041776.11, intron 5 of 6)	12077	ENSMUST00000147794.1	ENSMUSG00000042671	ENSMUST00000111814			Rgs8			protein_coding
e11ve16_common_1790	chr1	153703450	153704009	+	0.94391	NA	Intergenic	Intergenic	-10925	ENSMUST00000193511.1	ENSMUSG00000102404	ENSMUST00000193511			5530400K19Rik			TEC
e11ve16_common_1791	chr1	153739906	153740647	+	0.41214	NA	promoter-TSS (ENSMUST00000027748.7)	protein_coding-promoter-TSS (ENSMUST00000027748.7)	-73	ENSMUST00000027748.7	ENSMUSG00000026475	ENSMUST00000027748			Rgs16			protein_coding
e11ve16_common_1792	chr1	153749339	153750225	+	0.09595	NA	promoter-TSS (ENSMUST00000187415.1)	lncRNA-promoter-TSS (ENSMUST00000187415.1)	278	ENSMUST00000182722.7	ENSMUSG00000066800	ENSMUST00000183241			Rnasel			protein_coding
e11ve16_common_1793	chr1	153899481	153899898	+	2.15108	NA	promoter-TSS (ENSMUST00000086199.11)	protein_coding-promoter-TSS (ENSMUST00000086199.11)	-237	ENSMUST00000183582.1	ENSMUSG00000099227	ENSMUST00000183582			Mir8114			miRNA
e11ve16_common_1794	chr1	153900015	153901117	+	0.35973	NA	promoter-TSS (ENSMUST00000123490.1)	protein_coding-promoter-TSS (ENSMUST00000123490.1)	-19	ENSMUST00000140685.3	ENSMUSG00000026473	ENSMUST00000086199			Glul			protein_coding
e11ve16_common_1795	chr1	153910905	153911197	+	0.125	NA	Intergenic	Intergenic	5008	ENSMUST00000154576.1	ENSMUSG00000026473	ENSMUST00000086199			Glul			protein_coding
e11ve16_common_1796	chr1	153962054	153962639	+	0.08423	NA	Intergenic	Intergenic	23120	ENSMUST00000185385.1	ENSMUSG00000100014	ENSMUST00000185385			Gm29290			lncRNA
e11ve16_common_1797	chr1	154034011	154034553	+	1.47754	NA	promoter-TSS (ENSMUST00000188704.1)	lncRNA-promoter-TSS (ENSMUST00000188704.1)	19	ENSMUST00000188704.1	ENSMUSG00000100502	ENSMUST00000188704			Gm28286			lncRNA
e11ve16_common_1798	chr1	154112377	154113042	+	0.70719	NA	intron (ENSMUST00000190485.1, intron 1 of 3)	lncRNA-intron (ENSMUST00000185465.6, intron 1 of 2)	3444	ENSMUST00000185465.6	ENSMUSG00000100627	ENSMUST00000185465			A830008E24Rik			lncRNA
e11ve16_common_1799	chr1	154117606	154118804	+	0.22812	NA	promoter-TSS (ENSMUST00000190485.1)	lncRNA-promoter-TSS (ENSMUST00000190485.1)	-254	ENSMUST00000190485.1	ENSMUSG00000100627	ENSMUST00000185465			A830008E24Rik			lncRNA
e11ve16_common_1800	chr1	154150242	154150594	+	0.43326	NA	Intergenic	Intergenic	-32467	ENSMUST00000190485.1	ENSMUSG00000100627	ENSMUST00000185465			A830008E24Rik			lncRNA
e11ve16_common_1801	chr1	154182894	154183641	+	1.3652	NA	Intergenic	Intergenic	-17920	ENSMUST00000086195.6	ENSMUSG00000066797	ENSMUST00000086195			Zfp648			protein_coding
e11ve16_common_1802	chr1	154204791	154205497	+	1.31535	NA	exon (ENSMUST00000086195.6, exon 2 of 2)	protein_coding-exon (ENSMUST00000086195.6, exon 2 of 2)	3957	ENSMUST00000086195.6	ENSMUSG00000066797	ENSMUST00000086195			Zfp648			protein_coding
e11ve16_common_1803	chr1	154779816	154780267	+	0.04248	NA	intron (ENSMUST00000188321.1, intron 1 of 3)	protein_coding-intron (ENSMUST00000188321.1, intron 1 of 3)	36900	ENSMUST00000238369.1	ENSMUSG00000004110	ENSMUST00000187541			Cacna1e			protein_coding
e11ve16_common_1804	chr1	154786110	154786583	+	0.67019	NA	intron (ENSMUST00000188321.1, intron 1 of 3)	protein_coding-intron (ENSMUST00000188321.1, intron 1 of 3)	30595	ENSMUST00000238369.1	ENSMUSG00000004110	ENSMUST00000187541			Cacna1e			protein_coding
e11ve16_common_1805	chr1	154883689	154884999	+	1.43155	NA	promoter-TSS (ENSMUST00000186256.1)	protein_coding-promoter-TSS (ENSMUST00000186256.1)	157	ENSMUST00000188321.1	ENSMUSG00000004110	ENSMUST00000187541			Cacna1e			protein_coding
e11ve16_common_1806	chr1	155006471	155006822	+	0.14865	NA	Intergenic	Intergenic	-25093	ENSMUST00000191584.1	ENSMUSG00000101433	ENSMUST00000191584			Gm29441			processed_pseudogene
e11ve16_common_1807	chr1	155030770	155031042	+	1.40397	NA	promoter-TSS (ENSMUST00000191584.1)	processed_pseudogene-promoter-TSS (ENSMUST00000191584.1)	-833	ENSMUST00000191584.1	ENSMUSG00000101433	ENSMUST00000191584			Gm29441			processed_pseudogene
e11ve16_common_1808	chr1	155052211	155053096	+	1.01763	NA	intron (ENSMUST00000190720.1, intron 1 of 3)	lncRNA-intron (ENSMUST00000190720.1, intron 1 of 3)	4526	ENSMUST00000190720.1	ENSMUSG00000101880	ENSMUST00000190720			Gm29282			lncRNA
e11ve16_common_1809	chr1	155069589	155070112	+	0.35098	NA	intron (ENSMUST00000181160.2, intron 3 of 6)	lncRNA-intron (ENSMUST00000181160.2, intron 3 of 6)	-12671	ENSMUST00000190720.1	ENSMUSG00000101880	ENSMUST00000190720			Gm29282			lncRNA
e11ve16_common_1810	chr1	155082917	155084149	+	0.35517	NA	promoter-TSS (ENSMUST00000181160.2)	lncRNA-promoter-TSS (ENSMUST00000181160.2)	-267	ENSMUST00000181160.2	ENSMUSG00000096950	ENSMUST00000181160			Gm9530			lncRNA
e11ve16_common_1811	chr1	155098330	155099824	+	0.4912	NA	exon (ENSMUST00000055322.5, exon 1 of 1)	protein_coding-exon (ENSMUST00000055322.5, exon 1 of 1)	559	ENSMUST00000055322.5	ENSMUSG00000056708	ENSMUST00000055322			Ier5			protein_coding
e11ve16_common_1812	chr1	155108035	155108611	+	1.22294	NA	Intergenic	Intergenic	-8687	ENSMUST00000055322.5	ENSMUSG00000056708	ENSMUST00000055322			Ier5			protein_coding
e11ve16_common_1813	chr1	155158321	155159328	+	1.02717	NA	promoter-TSS (ENSMUST00000191769.1)	protein_coding-promoter-TSS (ENSMUST00000191769.1)	25	ENSMUST00000191769.1	ENSMUSG00000026470	ENSMUST00000192519			Stx6			protein_coding
e11ve16_common_1814	chr1	155199251	155199833	+	0.91822	NA	intron (ENSMUST00000192690.1, intron 3 of 3)	protein_coding-intron (ENSMUST00000027743.12, intron 7 of 7)	4521	ENSMUST00000194158.1	ENSMUSG00000026470	ENSMUST00000192519			Stx6			protein_coding
e11ve16_common_1815	chr1	155224070	155224652	+	0.08411	NA	intron (ENSMUST00000186156.6, intron 5 of 9)	protein_coding-intron (ENSMUST00000035914.4, intron 2 of 6)	813	ENSMUST00000186551.1	ENSMUSG00000033722	ENSMUST00000190976			BC034090			protein_coding
e11ve16_common_1816	chr1	155281438	155281932	+	0.10798	NA	TTS (ENSMUST00000111774.1)	protein_coding-TTS (ENSMUST00000111774.1)	10342	ENSMUST00000192359.1	ENSMUSG00000026469	ENSMUST00000111774			Xpr1			protein_coding
e11ve16_common_1817	chr1	155416612	155417592	+	1.23667	NA	intron (ENSMUST00000111775.7, intron 1 of 13)	protein_coding-intron (ENSMUST00000027741.11, intron 1 of 14)	227	ENSMUST00000027741.11	ENSMUSG00000026469	ENSMUST00000111774			Xpr1			protein_coding
e11ve16_common_1818	chr1	155438597	155439147	+	0.26643	NA	Intergenic	Intergenic	-21457	ENSMUST00000111774.1	ENSMUSG00000026469	ENSMUST00000111774			Xpr1			protein_coding
e11ve16_common_1819	chr1	155482173	155482409	+	0.60047	NA	Intergenic	Intergenic	44820	ENSMUST00000097531.2	ENSMUSG00000073535	ENSMUST00000194133			Gm5532			lncRNA
e11ve16_common_1820	chr1	155491270	155491655	+	0.37224	NA	Intergenic	Intergenic	35649	ENSMUST00000097531.2	ENSMUSG00000073535	ENSMUST00000194133			Gm5532			lncRNA
e11ve16_common_1821	chr1	155527263	155527520	+	1.92733	NA	promoter-TSS (ENSMUST00000097531.2)	lncRNA-promoter-TSS (ENSMUST00000097531.2)	-248	ENSMUST00000194133.1	ENSMUSG00000073535	ENSMUST00000194133			Gm5532			lncRNA
e11ve16_common_1822	chr1	155557848	155558839	+	0.09816	NA	exon (ENSMUST00000035560.8, exon 1 of 8)	protein_coding-exon (ENSMUST00000035560.8, exon 1 of 8)	217	ENSMUST00000097529.4	ENSMUSG00000033701	ENSMUST00000194476			Acbd6			protein_coding
e11ve16_common_1823	chr1	155576242	155576585	+	0.28741	NA	intron (ENSMUST00000194476.1, intron 3 of 7)	protein_coding-intron (ENSMUST00000035560.8, intron 3 of 7)	9165	ENSMUST00000159339.1	ENSMUSG00000033701	ENSMUST00000194476			Acbd6			protein_coding
e11ve16_common_1824	chr1	155693165	155693793	+	1.5904	NA	Intergenic	Intergenic	6488	ENSMUST00000192730.1	ENSMUSG00000033701	ENSMUST00000194476			Acbd6			protein_coding
e11ve16_common_1825	chr1	155722341	155722610	+	0.13928	NA	intron (ENSMUST00000195275.1, intron 2 of 4)	protein_coding-intron (ENSMUST00000027740.13, intron 2 of 5)	19552	ENSMUST00000027740.13	ENSMUSG00000026468	ENSMUST00000195275			Lhx4			protein_coding
e11ve16_common_1826	chr1	155740864	155741274	+	2.52888	NA	intron (ENSMUST00000195275.1, intron 1 of 4)	protein_coding-intron (ENSMUST00000027740.13, intron 1 of 5)	958	ENSMUST00000027740.13	ENSMUSG00000026468	ENSMUST00000195275			Lhx4			protein_coding
e11ve16_common_1827	chr1	155742523	155743075	+	1.42027	NA	promoter-TSS (ENSMUST00000027740.13)	protein_coding-promoter-TSS (ENSMUST00000027740.13)	-772	ENSMUST00000027740.13	ENSMUSG00000026468	ENSMUST00000195275			Lhx4			protein_coding
e11ve16_common_1828	chr1	155784754	155785398	+	0.30875	NA	intron (ENSMUST00000035325.14, intron 8 of 11)	protein_coding-intron (ENSMUST00000035325.14, intron 8 of 11)	-3080	ENSMUST00000130701.1	ENSMUSG00000033684	ENSMUST00000132495			Qsox1			protein_coding
e11ve16_common_1829	chr1	155797027	155797416	+	0.08287	NA	intron (ENSMUST00000111764.7, intron 2 of 12)	protein_coding-intron (ENSMUST00000035325.14, intron 2 of 11)	-1804	ENSMUST00000132495.1	ENSMUSG00000033684	ENSMUST00000132495			Qsox1			protein_coding
e11ve16_common_1830	chr1	155812364	155813383	+	0.36556	NA	promoter-TSS (ENSMUST00000035325.14)	protein_coding-promoter-TSS (ENSMUST00000035325.14)	16	ENSMUST00000035325.14	ENSMUSG00000033684	ENSMUST00000132495			Qsox1			protein_coding
e11ve16_common_1831	chr1	155972561	155974178	+	1.12783	NA	promoter-TSS (ENSMUST00000124495.2)	protein_coding-promoter-TSS (ENSMUST00000124495.2)	51	ENSMUST00000193347.1	ENSMUSG00000102833	ENSMUST00000193347			Gm9694			TEC
e11ve16_common_1832	chr1	156035768	156036669	+	1.50039	NA	promoter-TSS (ENSMUST00000123705.7)	protein_coding-promoter-TSS (ENSMUST00000123705.7)	-71	ENSMUST00000141980.1	ENSMUSG00000026466	ENSMUST00000169241			Tor1aip1			protein_coding
e11ve16_common_1833	chr1	156040764	156041146	+	0.44784	NA	promoter-TSS (ENSMUST00000060404.4)	protein_coding-promoter-TSS (ENSMUST00000060404.4)	38	ENSMUST00000065648.14	ENSMUSG00000050565	ENSMUST00000060404			Tor1aip2			protein_coding
e11ve16_common_1834	chr1	156184145	156184643	+	1.10903	NA	intron (ENSMUST00000015628.3, intron 1 of 4)	protein_coding-intron (ENSMUST00000015628.3, intron 1 of 4)	20632	ENSMUST00000015628.3	ENSMUSG00000015484	ENSMUST00000015628			Fam163a			protein_coding
e11ve16_common_1835	chr1	156204829	156205150	+	2.30588	NA	promoter-TSS (ENSMUST00000015628.3)	protein_coding-promoter-TSS (ENSMUST00000015628.3)	37	ENSMUST00000015628.3	ENSMUSG00000015484	ENSMUST00000015628			Fam163a			protein_coding
e11ve16_common_1836	chr1	156241284	156242176	+	0.33972	NA	Intergenic	Intergenic	-14437	ENSMUST00000193704.1	ENSMUSG00000102932	ENSMUST00000193704			Gm38113			processed_pseudogene
e11ve16_common_1837	chr1	156302946	156303998	+	0.3933	NA	promoter-TSS (ENSMUST00000167528.8)	protein_coding-promoter-TSS (ENSMUST00000167528.8)	-17	ENSMUST00000195064.1	ENSMUSG00000103705	ENSMUST00000195064			4930518J20Rik			lncRNA
e11ve16_common_1838	chr1	156310635	156311073	+	0.3218	NA	promoter-TSS (ENSMUST00000193020.1)	protein_coding-promoter-TSS (ENSMUST00000193020.1)	127	ENSMUST00000027896.9	ENSMUSG00000026602	ENSMUST00000193020			Nphs2			protein_coding
e11ve16_common_1839	chr1	156420559	156421427	+	0.18053	NA	promoter-TSS (ENSMUST00000179744.1)	protein_coding-promoter-TSS (ENSMUST00000179744.1)	-71	ENSMUST00000179744.1	ENSMUSG00000026601	ENSMUST00000179985			Axdnd1			protein_coding
e11ve16_common_1840	chr1	156470594	156470814	+	0.07397	NA	intron (ENSMUST00000191379.6, intron 1 of 6)	protein_coding-intron (ENSMUST00000187073.1, intron 1 of 3)	3493	ENSMUST00000187073.1	ENSMUSG00000026600	ENSMUST00000187507			Soat1			protein_coding
e11ve16_common_1841	chr1	156474004	156474505	+	0.40952	NA	promoter-TSS (ENSMUST00000187073.1)	protein_coding-promoter-TSS (ENSMUST00000187073.1)	10	ENSMUST00000188027.1	ENSMUSG00000026600	ENSMUST00000187507			Soat1			protein_coding
e11ve16_common_1842	chr1	156520136	156520904	+	0.91393	NA	Intergenic	Intergenic	-3492	ENSMUST00000190422.2	ENSMUSG00000101523	ENSMUST00000190422			Csnk2a3			processed_pseudogene
e11ve16_common_1843	chr1	156558271	156559793	+	0.69252	NA	promoter-TSS (ENSMUST00000027888.12)	protein_coding-promoter-TSS (ENSMUST00000027888.12)	-17	ENSMUST00000027888.12	ENSMUSG00000026596	ENSMUST00000190749			Abl2			protein_coding
e11ve16_common_1844	chr1	156620450	156620944	+	1.78658	NA	intron (ENSMUST00000190749.1, intron 1 of 4)	protein_coding-intron (ENSMUST00000027888.12, intron 1 of 11)	4774	ENSMUST00000190749.1	ENSMUSG00000026596	ENSMUST00000190749			Abl2			protein_coding
e11ve16_common_1845	chr1	156652367	156652908	+	0.13395	NA	TTS (ENSMUST00000079625.10)	protein_coding-TTS (ENSMUST00000079625.10)	5821	ENSMUST00000154353.1	ENSMUSG00000060519	ENSMUST00000079625			Tor3a			protein_coding
e11ve16_common_1846	chr1	156660269	156660561	+	1.11367	NA	TTS (ENSMUST00000152604.1)	protein_coding-TTS (ENSMUST00000152604.1)	-1957	ENSMUST00000154353.1	ENSMUSG00000060519	ENSMUST00000079625			Tor3a			protein_coding
e11ve16_common_1847	chr1	156673538	156674763	+	0.71948	NA	exon (ENSMUST00000079625.10, exon 1 of 6)	protein_coding-exon (ENSMUST00000079625.10, exon 1 of 6)	164	ENSMUST00000122242.7	ENSMUSG00000060519	ENSMUST00000079625			Tor3a			protein_coding
e11ve16_common_1848	chr1	156717967	156719640	+	0.62554	NA	intron (ENSMUST00000122424.7, intron 1 of 8)	protein_coding-intron (ENSMUST00000086153.7, intron 1 of 7)	269	ENSMUST00000122424.7	ENSMUSG00000033557	ENSMUST00000188941			Fam20b			protein_coding
e11ve16_common_1849	chr1	156752290	156752521	+	0.06046	NA	Intergenic	Intergenic	-33319	ENSMUST00000086153.7	ENSMUSG00000033557	ENSMUST00000188941			Fam20b			protein_coding
e11ve16_common_1850	chr1	156808194	156809093	+	0.1403	NA	exon (ENSMUST00000063199.12, exon 20 of 20)	protein_coding-exon (ENSMUST00000063199.12, exon 20 of 20)	4925	ENSMUST00000189208.1	ENSMUSG00000026594	ENSMUST00000171292			Ralgps2			protein_coding
e11ve16_common_1851	chr1	156813669	156814329	+	0.34137	NA	promoter-TSS (ENSMUST00000189208.1)	protein_coding-promoter-TSS (ENSMUST00000189208.1)	-431	ENSMUST00000189208.1	ENSMUSG00000026594	ENSMUST00000171292			Ralgps2			protein_coding
e11ve16_common_1852	chr1	156838322	156839166	+	0.73197	NA	promoter-TSS (ENSMUST00000111720.1)	protein_coding-promoter-TSS (ENSMUST00000111720.1)	182	ENSMUST00000027885.7	ENSMUSG00000033544	ENSMUST00000111720			Angptl1			protein_coding
e11ve16_common_1853	chr1	156938725	156939057	+	1.46944	NA	promoter-TSS (ENSMUST00000186765.1)	lncRNA-promoter-TSS (ENSMUST00000186765.1)	-73	ENSMUST00000188656.6	ENSMUSG00000026594	ENSMUST00000171292			Ralgps2			protein_coding
e11ve16_common_1854	chr1	156939339	156940311	+	1.85111	NA	promoter-TSS (ENSMUST00000027886.13)	protein_coding-promoter-TSS (ENSMUST00000027886.13)	-13	ENSMUST00000186765.1	ENSMUSG00000101905	ENSMUST00000186765			4930439D14Rik			lncRNA
e11ve16_common_1855	chr1	157039179	157040297	+	0.90279	NA	intron (ENSMUST00000190681.1, intron 2 of 2)	lncRNA-intron (ENSMUST00000190681.1, intron 2 of 2)	-3809	ENSMUST00000193527.1	ENSMUSG00000103325	ENSMUST00000193527			Gm10531			TEC
e11ve16_common_1856	chr1	157076388	157077300	+	0.68068	NA	Intergenic	Intergenic	-22810	ENSMUST00000190681.1	ENSMUSG00000101768	ENSMUST00000190681			Gm28694			lncRNA
e11ve16_common_1857	chr1	157086064	157086346	+	0.99549	NA	Intergenic	Intergenic	22183	ENSMUST00000119526.1	ENSMUSG00000026592	ENSMUST00000118207			Tex35			protein_coding
e11ve16_common_1858	chr1	157177073	157177665	+	0.3385	NA	intron (ENSMUST00000078308.12, intron 7 of 17)	protein_coding-intron (ENSMUST00000078308.12, intron 7 of 17)	4072	ENSMUST00000128538.1	ENSMUSG00000070565	ENSMUST00000134543			Rasal2			protein_coding
e11ve16_common_1859	chr1	157253793	157254268	+	0.31445	NA	intron (ENSMUST00000132699.7, intron 3 of 17)	protein_coding-intron (ENSMUST00000078308.12, intron 3 of 17)	2652	ENSMUST00000134543.7	ENSMUSG00000070565	ENSMUST00000134543			Rasal2			protein_coding
e11ve16_common_1860	chr1	157320549	157320959	+	0.12027	NA	intron (ENSMUST00000143080.1, intron 1 of 2)	protein_coding-intron (ENSMUST00000078308.12, intron 1 of 17)	29289	ENSMUST00000193958.1	ENSMUSG00000102326	ENSMUST00000193958			Gm37788			TEC
e11ve16_common_1861	chr1	157411648	157412380	+	1.21311	NA	promoter-TSS (ENSMUST00000061537.11)	transcribed_processed_pseudogene-promoter-TSS (ENSMUST00000061537.11)	-80	ENSMUST00000132699.7	ENSMUSG00000070565	ENSMUST00000134543			Rasal2			protein_coding
e11ve16_common_1862	chr1	157412576	157413074	+	1.25912	NA	promoter-TSS (ENSMUST00000078308.12)	protein_coding-promoter-TSS (ENSMUST00000078308.12)	-153	ENSMUST00000194868.1	ENSMUSG00000049881	ENSMUST00000187761			2810025M15Rik			transcribed_processed_pseudogene
e11ve16_common_1863	chr1	157443388	157443587	+	0.03694	NA	Intergenic	Intergenic	-15090	ENSMUST00000193791.5	ENSMUSG00000033488	ENSMUST00000195702			Cryzl2			protein_coding
e11ve16_common_1864	chr1	157449499	157450454	+	0.142	NA	Intergenic	Intergenic	-8601	ENSMUST00000193791.5	ENSMUSG00000033488	ENSMUST00000195702			Cryzl2			protein_coding
e11ve16_common_1865	chr1	157458127	157459238	+	0.18231	NA	intron (ENSMUST00000119891.6, intron 1 of 6)	protein_coding-intron (ENSMUST00000046743.10, intron 1 of 9)	102	ENSMUST00000046743.10	ENSMUSG00000033488	ENSMUST00000195702			Cryzl2			protein_coding
e11ve16_common_1866	chr1	157512885	157513178	+	2.04193	NA	intron (ENSMUST00000086130.8, intron 2 of 27)	protein_coding-intron (ENSMUST00000027881.14, intron 1 of 26)	-1310	ENSMUST00000135147.2	ENSMUSG00000087093	ENSMUST00000135147			Gm15486			lncRNA
e11ve16_common_1867	chr1	157526873	157527205	+	0.75937	NA	intron (ENSMUST00000111700.7, intron 1 of 25)	protein_coding-intron (ENSMUST00000027881.14, intron 2 of 26)	892	ENSMUST00000111700.7	ENSMUSG00000026589	ENSMUST00000146873			Sec16b			protein_coding
e11ve16_common_1868	chr1	157552996	157553199	+	0.0614	NA	intron (ENSMUST00000146873.2, intron 10 of 15)	protein_coding-intron (ENSMUST00000027881.14, intron 15 of 26)	15046	ENSMUST00000155665.1	ENSMUSG00000026589	ENSMUST00000146873			Sec16b			protein_coding
e11ve16_common_1869	chr1	157554907	157555140	+	0.54194	NA	intron (ENSMUST00000027881.14, intron 16 of 26)	protein_coding-intron (ENSMUST00000027881.14, intron 16 of 26)	16972	ENSMUST00000155665.1	ENSMUSG00000026589	ENSMUST00000146873			Sec16b			protein_coding
e11ve16_common_1870	chr1	157560626	157561093	+	0.86169	NA	exon (ENSMUST00000027881.14, exon 20 of 27)	protein_coding-exon (ENSMUST00000027881.14, exon 20 of 27)	22808	ENSMUST00000155665.1	ENSMUSG00000026589	ENSMUST00000146873			Sec16b			protein_coding
e11ve16_common_1871	chr1	157703345	157703718	+	0.35807	NA	Intergenic	Intergenic	-81395	ENSMUST00000193203.1	ENSMUSG00000103962	ENSMUST00000193203			Gm38213			processed_pseudogene
e11ve16_common_1872	chr1	157705209	157705814	+	0.11228	NA	Intergenic	Intergenic	-83375	ENSMUST00000193203.1	ENSMUSG00000103962	ENSMUST00000193203			Gm38213			processed_pseudogene
e11ve16_common_1873	chr1	157716949	157717754	+	0.42305	NA	Intergenic	Intergenic	-95215	ENSMUST00000193203.1	ENSMUSG00000103962	ENSMUST00000193203			Gm38213			processed_pseudogene
e11ve16_common_1874	chr1	157745591	157746239	+	0.51283	NA	Intergenic	Intergenic	-123779	ENSMUST00000193203.1	ENSMUSG00000103962	ENSMUST00000193203			Gm38213			processed_pseudogene
e11ve16_common_1875	chr1	157755250	157755731	+	0.54171	NA	Intergenic	Intergenic	-133354	ENSMUST00000193203.1	ENSMUSG00000103962	ENSMUST00000193203			Gm38213			processed_pseudogene
e11ve16_common_1876	chr1	157877272	157877630	+	1.42225	NA	Intergenic	Intergenic	-62934	ENSMUST00000192097.1	ENSMUSG00000102789	ENSMUST00000192097			Gm38256			TEC
e11ve16_common_1877	chr1	158163404	158164101	+	1.01176	NA	Intergenic	Intergenic	132712	ENSMUST00000194578.1	ENSMUSG00000004031	ENSMUST00000194578			Brinp2			protein_coding
e11ve16_common_1878	chr1	158249926	158250720	+	1.20271	NA	intron (ENSMUST00000004133.10, intron 6 of 7)	protein_coding-intron (ENSMUST00000004133.10, intron 6 of 7)	46141	ENSMUST00000194578.1	ENSMUSG00000004031	ENSMUST00000194578			Brinp2			protein_coding
e11ve16_common_1879	chr1	158355702	158356820	+	0.96719	NA	promoter-TSS (ENSMUST00000004133.10)	protein_coding-promoter-TSS (ENSMUST00000004133.10)	-32	ENSMUST00000195271.4	ENSMUSG00000004031	ENSMUST00000194578			Brinp2			protein_coding
e11ve16_common_1880	chr1	158597028	158597639	+	0.09566	NA	TTS (ENSMUST00000193599.1)	protein_coding-TTS (ENSMUST00000193599.1)	355	ENSMUST00000194041.1	ENSMUSG00000026587	ENSMUST00000194041			Astn1			protein_coding
e11ve16_common_1881	chr1	158654190	158654827	+	0.24976	NA	intron (ENSMUST00000195311.5, intron 16 of 21)	protein_coding-intron (ENSMUST00000046110.15, intron 16 of 22)	-2641	ENSMUST00000194217.1	ENSMUSG00000026587	ENSMUST00000194041			Astn1			protein_coding
e11ve16_common_1882	chr1	158670345	158670639	+	0.08883	NA	intron (ENSMUST00000046110.15, intron 20 of 22)	protein_coding-intron (ENSMUST00000046110.15, intron 20 of 22)	-8302	ENSMUST00000194658.1	ENSMUSG00000026587	ENSMUST00000194041			Astn1			protein_coding
e11ve16_common_1883	chr1	158699496	158700799	+	0.18217	NA	Intergenic	Intergenic	21353	ENSMUST00000194658.1	ENSMUSG00000026587	ENSMUST00000194041			Astn1			protein_coding
e11ve16_common_1884	chr1	158931567	158932020	+	0.51808	NA	intron (ENSMUST00000159861.8, intron 2 of 21)	protein_coding-intron (ENSMUST00000159861.8, intron 2 of 21)	26574	ENSMUST00000159861.8	ENSMUSG00000073530	ENSMUST00000161589			Pappa2			protein_coding
e11ve16_common_1885	chr1	158953470	158954159	+	0.60203	NA	intron (ENSMUST00000159861.8, intron 1 of 21)	protein_coding-intron (ENSMUST00000159861.8, intron 1 of 21)	4553	ENSMUST00000159861.8	ENSMUSG00000073530	ENSMUST00000161589			Pappa2			protein_coding
e11ve16_common_1886	chr1	158960478	158960707	+	2.10594	NA	promoter-TSS (ENSMUST00000177789.1)	protein_coding-promoter-TSS (ENSMUST00000177789.1)	-211	ENSMUST00000177789.1	ENSMUSG00000073530	ENSMUST00000161589			Pappa2			protein_coding
e11ve16_common_1887	chr1	159150203	159150560	+	0.31569	NA	intron (ENSMUST00000195279.1, intron 3 of 4)	lncRNA-intron (ENSMUST00000195279.1, intron 3 of 4)	16109	ENSMUST00000195279.1	ENSMUSG00000104014	ENSMUST00000195279			4930562F17Rik			lncRNA
e11ve16_common_1888	chr1	159199581	159199863	+	0.33326	NA	Intergenic	Intergenic	11419	ENSMUST00000193824.1	ENSMUSG00000104169	ENSMUST00000193824			Gm7430			unprocessed_pseudogene
e11ve16_common_1889	chr1	159231917	159232233	+	2.00709	NA	promoter-TSS (ENSMUST00000076894.10)	protein_coding-promoter-TSS (ENSMUST00000076894.10)	-245	ENSMUST00000195800.5	ENSMUSG00000040782	ENSMUST00000192215			Cop1			protein_coding
e11ve16_common_1890	chr1	159232682	159233223	+	0.25949	NA	intron (ENSMUST00000195800.5, intron 1 of 3)	protein_coding-intron (ENSMUST00000076894.10, intron 1 of 19)	262	ENSMUST00000195554.5	ENSMUSG00000040782	ENSMUST00000192215			Cop1			protein_coding
e11ve16_common_1891	chr1	159396459	159396856	+	0.68521	NA	Intergenic	Intergenic	18253	ENSMUST00000194705.1	ENSMUSG00000103289	ENSMUST00000194705			Gm31256			processed_pseudogene
e11ve16_common_1892	chr1	159523659	159524510	+	0.74167	NA	exon (ENSMUST00000192069.5, exon 1 of 23)	protein_coding-exon (ENSMUST00000192069.5, exon 1 of 23)	243	ENSMUST00000195199.1	ENSMUSG00000015829	ENSMUST00000111669			Tnr			protein_coding
e11ve16_common_1893	chr1	159650462	159650808	+	2.41719	NA	intron (ENSMUST00000097514.7, intron 1 of 1)	lncRNA-intron (ENSMUST00000097514.7, intron 1 of 1)	-31027	ENSMUST00000194909.1	ENSMUSG00000073528	ENSMUST00000194909			Gm10530			lncRNA
e11ve16_common_1894	chr1	159812782	159813151	+	0.19119	NA	intron (ENSMUST00000193325.1, intron 1 of 1)	protein_coding-intron (ENSMUST00000111669.8, intron 1 of 21)	-37431	ENSMUST00000192457.1	ENSMUSG00000015829	ENSMUST00000111669			Tnr			protein_coding
e11ve16_common_1895	chr1	159854143	159854399	+	0.70963	NA	intron (ENSMUST00000192069.5, intron 4 of 22)	protein_coding-intron (ENSMUST00000111669.8, intron 3 of 21)	3874	ENSMUST00000192457.1	ENSMUSG00000015829	ENSMUST00000111669			Tnr			protein_coding
e11ve16_common_1896	chr1	159854613	159854841	+	1.89265	NA	intron (ENSMUST00000192069.5, intron 4 of 22)	protein_coding-intron (ENSMUST00000111669.8, intron 3 of 21)	4330	ENSMUST00000192457.1	ENSMUSG00000015829	ENSMUST00000111669			Tnr			protein_coding
e11ve16_common_1897	chr1	159869483	159869860	+	0.32687	NA	intron (ENSMUST00000192069.5, intron 8 of 22)	protein_coding-intron (ENSMUST00000111669.8, intron 7 of 21)	19274	ENSMUST00000192457.1	ENSMUSG00000015829	ENSMUST00000111669			Tnr			protein_coding
e11ve16_common_1898	chr1	159870214	159870740	+	0.89283	NA	intron (ENSMUST00000192069.5, intron 8 of 22)	protein_coding-intron (ENSMUST00000111669.8, intron 7 of 21)	20080	ENSMUST00000192457.1	ENSMUSG00000015829	ENSMUST00000111669			Tnr			protein_coding
e11ve16_common_1899	chr1	160043954	160044233	+	1.32277	NA	promoter-TSS (ENSMUST00000060298.14)	protein_coding-promoter-TSS (ENSMUST00000060298.14)	238	ENSMUST00000193461.1	ENSMUSG00000104111	ENSMUST00000193461			Gm37294			lncRNA
e11ve16_common_1900	chr1	160057383	160057711	+	0.91927	NA	intron (ENSMUST00000165923.1, intron 2 of 3)	protein_coding-intron (ENSMUST00000060298.14, intron 1 of 2)	13100	ENSMUST00000165923.1	ENSMUSG00000090394	ENSMUST00000168250			4930523C07Rik			protein_coding
e11ve16_common_1901	chr1	160080986	160081281	+	0.05751	NA	TTS (ENSMUST00000163892.7)	protein_coding-TTS (ENSMUST00000163892.7)	-3148	ENSMUST00000164249.2	ENSMUSG00000026729	ENSMUST00000169600			4930562F07Rik			lncRNA
e11ve16_common_1902	chr1	160105481	160106220	+	0.0838	NA	intron (ENSMUST00000131919.1, intron 12 of 17)	protein_coding-intron (ENSMUST00000039178.11, intron 16 of 21)	-27865	ENSMUST00000164249.2	ENSMUSG00000026729	ENSMUST00000169600			4930562F07Rik			lncRNA
e11ve16_common_1903	chr1	160194735	160195757	+	1.04819	NA	promoter-TSS (ENSMUST00000078878.13)	protein_coding-promoter-TSS (ENSMUST00000078878.13)	31	ENSMUST00000135680.7	ENSMUSG00000058267	ENSMUST00000078878			Mrps14			protein_coding
e11ve16_common_1904	chr1	160212158	160212665	+	1.49335	NA	promoter-TSS (ENSMUST00000193962.1)	TEC-promoter-TSS (ENSMUST00000193962.1)	315	ENSMUST00000194167.1	ENSMUSG00000014226	ENSMUST00000014370			Cacybp			protein_coding
e11ve16_common_1905	chr1	160213339	160213572	+	0.20051	NA	promoter-TSS (ENSMUST00000014370.10)	protein_coding-promoter-TSS (ENSMUST00000014370.10)	512	ENSMUST00000193962.1	ENSMUSG00000103006	ENSMUST00000193962			4933417C20Rik			TEC
e11ve16_common_1906	chr1	160243410	160243846	+	0.10749	NA	intron (ENSMUST00000193185.5, intron 3 of 6)	protein_coding-intron (ENSMUST00000028052.11, intron 4 of 8)	4370	ENSMUST00000194623.1	ENSMUSG00000026721	ENSMUST00000193185			Rabgap1l			protein_coding
e11ve16_common_1907	chr1	160250523	160250862	+	0.25615	NA	promoter-TSS (ENSMUST00000193729.1)	protein_coding-promoter-TSS (ENSMUST00000193729.1)	66	ENSMUST00000193729.1	ENSMUSG00000026721	ENSMUST00000193185			Rabgap1l			protein_coding
e11ve16_common_1908	chr1	160250991	160251495	+	0.29621	NA	promoter-TSS (ENSMUST00000193729.1)	protein_coding-promoter-TSS (ENSMUST00000193729.1)	200	ENSMUST00000191909.5	ENSMUSG00000026721	ENSMUST00000193185			Rabgap1l			protein_coding
e11ve16_common_1909	chr1	160259796	160260130	+	0.24048	NA	intron (ENSMUST00000235109.1, intron 3 of 6)	protein_coding-intron (ENSMUST00000028049.12, intron 19 of 20)	-4361	ENSMUST00000194105.1	ENSMUSG00000104302	ENSMUST00000194105			Gm36975			lncRNA
e11ve16_common_1910	chr1	160271270	160271999	+	0.36309	NA	intron (ENSMUST00000194105.1, intron 2 of 4)	protein_coding-intron (ENSMUST00000028049.12, intron 19 of 20)	7310	ENSMUST00000194105.1	ENSMUSG00000104302	ENSMUST00000194105			Gm36975			lncRNA
e11ve16_common_1911	chr1	160309192	160310035	+	0.22801	NA	promoter-TSS (ENSMUST00000191941.1)	protein_coding-promoter-TSS (ENSMUST00000191941.1)	-442	ENSMUST00000191941.1	ENSMUSG00000026721	ENSMUST00000193185			Rabgap1l			protein_coding
e11ve16_common_1912	chr1	160351275	160352443	+	1.50146	NA	promoter-TSS (ENSMUST00000028052.11)	protein_coding-promoter-TSS (ENSMUST00000028052.11)	-288	ENSMUST00000028052.11	ENSMUSG00000026721	ENSMUST00000193185			Rabgap1l			protein_coding
e11ve16_common_1913	chr1	160377132	160377496	+	1.08595	NA	intron (ENSMUST00000191651.5, intron 2 of 4)	protein_coding-intron (ENSMUST00000028049.12, intron 18 of 20)	-25743	ENSMUST00000028052.11	ENSMUSG00000026721	ENSMUST00000193185			Rabgap1l			protein_coding
e11ve16_common_1914	chr1	160377795	160378070	+	2.08146	NA	intron (ENSMUST00000191651.5, intron 2 of 4)	protein_coding-intron (ENSMUST00000028049.12, intron 18 of 20)	-26361	ENSMUST00000028052.11	ENSMUSG00000026721	ENSMUST00000193185			Rabgap1l			protein_coding
e11ve16_common_1915	chr1	160792012	160793367	+	0.40035	NA	intron (ENSMUST00000193810.1, intron 1 of 3)	protein_coding-intron (ENSMUST00000028049.12, intron 1 of 20)	249	ENSMUST00000195442.5	ENSMUSG00000026721	ENSMUST00000193185			Rabgap1l			protein_coding
e11ve16_common_1916	chr1	160906404	160907446	+	0.21703	NA	intron (ENSMUST00000161609.7, intron 1 of 19)	protein_coding-intron (ENSMUST00000161609.7, intron 1 of 19)	507	ENSMUST00000161609.7	ENSMUSG00000040423	ENSMUST00000239200			Rc3h1			protein_coding
e11ve16_common_1917	chr1	160934101	160934349	+	0.74953	NA	intron (ENSMUST00000239200.1, intron 2 of 20)	protein_coding-intron (ENSMUST00000035911.4, intron 1 of 18)	4201	ENSMUST00000035911.4	ENSMUSG00000040423	ENSMUST00000239200			Rc3h1			protein_coding
e11ve16_common_1918	chr1	161034156	161034662	+	0.36332	NA	promoter-TSS (ENSMUST00000065709.11)	lncRNA-promoter-TSS (ENSMUST00000065709.11)	-13	ENSMUST00000160152.7	ENSMUSG00000053332	ENSMUST00000159037			Gas5			lncRNA
e11ve16_common_1919	chr1	161034938	161035784	+	0.27934	NA	promoter-TSS (ENSMUST00000082506.1)	snoRNA-promoter-TSS (ENSMUST00000082506.1)	-33	ENSMUST00000082506.1	ENSMUSG00000064440	ENSMUST00000082506			Gm26224			snoRNA
e11ve16_common_1920	chr1	161070192	161070666	+	1.40621	NA	promoter-TSS (ENSMUST00000028035.13)	protein_coding-promoter-TSS (ENSMUST00000028035.13)	178	ENSMUST00000160591.7	ENSMUSG00000026709	ENSMUST00000162398			Dars2			protein_coding
e11ve16_common_1921	chr1	161070827	161071592	+	0.52535	NA	promoter-TSS (ENSMUST00000035430.3)	protein_coding-promoter-TSS (ENSMUST00000035430.3)	193	ENSMUST00000195571.1	ENSMUSG00000026708	ENSMUST00000195571			Cenpl			protein_coding
e11ve16_common_1922	chr1	161130796	161131640	+	0.73741	NA	intron (ENSMUST00000148952.7, intron 1 of 7)	protein_coding-intron (ENSMUST00000111611.7, intron 1 of 11)	210	ENSMUST00000117467.6	ENSMUSG00000026705	ENSMUST00000117467			Klhl20			protein_coding
e11ve16_common_1923	chr1	161142429	161142827	+	0.70341	NA	promoter-TSS (ENSMUST00000052245.8)	protein_coding-promoter-TSS (ENSMUST00000052245.8)	-63	ENSMUST00000125018.7	ENSMUSG00000044835	ENSMUST00000052245			Ankrd45			protein_coding
e11ve16_common_1924	chr1	161170507	161171185	+	0.52179	NA	TTS (ENSMUST00000111608.7)	protein_coding-TTS (ENSMUST00000111608.7)	-6090	ENSMUST00000193379.1	ENSMUSG00000102817	ENSMUST00000212885			Gm6185			transcribed_unprocessed_pseudogene
e11ve16_common_1925	chr1	161195644	161196377	+	0.44138	NA	intron (ENSMUST00000193379.1, intron 6 of 25)	transcribed_unprocessed_pseudogene-intron (ENSMUST00000193379.1, intron 6 of 25)	-4799	ENSMUST00000212885.1	ENSMUSG00000102817	ENSMUST00000212885			Gm6185			transcribed_unprocessed_pseudogene
e11ve16_common_1926	chr1	161249924	161251517	+	1.26249	NA	promoter-TSS (ENSMUST00000139387.7)	protein_coding-promoter-TSS (ENSMUST00000139387.7)	-166	ENSMUST00000139387.7	ENSMUSG00000026701	ENSMUST00000194613			Prdx6			protein_coding
e11ve16_common_1927	chr1	161286852	161287147	+	0.42082	NA	Intergenic	Intergenic	12015	ENSMUST00000194329.1	ENSMUSG00000104163	ENSMUST00000194329			Gm19057			processed_pseudogene
e11ve16_common_1928	chr1	161400289	161400549	+	0.15832	NA	intron (ENSMUST00000028024.4, intron 1 of 2)	protein_coding-intron (ENSMUST00000028024.4, intron 1 of 2)	5010	ENSMUST00000028024.4	ENSMUSG00000026700	ENSMUST00000028024			Tnfsf4			protein_coding
e11ve16_common_1929	chr1	161444349	161445682	+	0.62771	NA	Intergenic	Intergenic	49606	ENSMUST00000028024.4	ENSMUSG00000026700	ENSMUST00000028024			Tnfsf4			protein_coding
e11ve16_common_1930	chr1	161451444	161452459	+	1.35262	NA	Intergenic	Intergenic	-42704	ENSMUST00000086084.1	ENSMUSG00000066755	ENSMUST00000086084			Tnfsf18			protein_coding
e11ve16_common_1931	chr1	161461831	161463281	+	0.43172	NA	Intergenic	Intergenic	-32099	ENSMUST00000086084.1	ENSMUSG00000066755	ENSMUST00000086084			Tnfsf18			protein_coding
e11ve16_common_1932	chr1	161463497	161463746	+	0.07268	NA	Intergenic	Intergenic	-31034	ENSMUST00000086084.1	ENSMUSG00000066755	ENSMUST00000086084			Tnfsf18			protein_coding
e11ve16_common_1933	chr1	161576029	161576308	+	0.70734	NA	Intergenic	Intergenic	-23502	ENSMUST00000158728.1	ENSMUSG00000089353	ENSMUST00000158728			Gm25488			rRNA
e11ve16_common_1934	chr1	161712477	161712876	+	1.60565	NA	Intergenic	Intergenic	-1029	ENSMUST00000194337.1	ENSMUSG00000102860	ENSMUST00000194337			Gm37638			TEC
e11ve16_common_1935	chr1	161713090	161713340	+	0.47932	NA	promoter-TSS (ENSMUST00000194337.1)	TEC-promoter-TSS (ENSMUST00000194337.1)	-490	ENSMUST00000194337.1	ENSMUSG00000102860	ENSMUST00000194337			Gm37638			TEC
e11ve16_common_1936	chr1	161765936	161766837	+	0.28014	NA	Intergenic	Intergenic	20330	ENSMUST00000195878.1	ENSMUSG00000102399	ENSMUST00000195878			Gm5049			processed_pseudogene
e11ve16_common_1937	chr1	161875938	161876612	+	0.77661	NA	intron (ENSMUST00000048377.10, intron 1 of 23)	protein_coding-intron (ENSMUST00000048377.10, intron 1 of 23)	407	ENSMUST00000048377.10	ENSMUSG00000040297	ENSMUST00000194388			Suco			protein_coding
e11ve16_common_1938	chr1	161877335	161877732	+	0.38901	NA	promoter-TSS (ENSMUST00000048377.10)	protein_coding-promoter-TSS (ENSMUST00000048377.10)	-851	ENSMUST00000048377.10	ENSMUSG00000040297	ENSMUST00000194388			Suco			protein_coding
e11ve16_common_1939	chr1	161962286	161962666	+	1.63615	NA	intron (ENSMUST00000141397.1, intron 3 of 6)	protein_coding-intron (ENSMUST00000141397.1, intron 3 of 6)	6672	ENSMUST00000141397.1	ENSMUSG00000086277	ENSMUST00000141397			4930558K02Rik			protein_coding
e11ve16_common_1940	chr1	161962938	161963230	+	1.39301	NA	intron (ENSMUST00000141397.1, intron 3 of 6)	protein_coding-intron (ENSMUST00000141397.1, intron 3 of 6)	6064	ENSMUST00000141397.1	ENSMUSG00000086277	ENSMUST00000141397			4930558K02Rik			protein_coding
e11ve16_common_1941	chr1	161968874	161969769	+	0.65627	NA	promoter-TSS (ENSMUST00000141397.1)	protein_coding-promoter-TSS (ENSMUST00000141397.1)	19	ENSMUST00000159648.1	ENSMUSG00000026698	ENSMUST00000159648			Pigc			protein_coding
e11ve16_common_1942	chr1	161976289	161976965	+	0.19179	NA	intron (ENSMUST00000161826.1, intron 1 of 2)	lncRNA-intron (ENSMUST00000161826.1, intron 1 of 2)	3009	ENSMUST00000162676.1	ENSMUSG00000086277	ENSMUST00000141397			4930558K02Rik			protein_coding
e11ve16_common_1943	chr1	161999582	162000336	+	0.06541	NA	intron (ENSMUST00000070330.13, intron 19 of 19)	protein_coding-intron (ENSMUST00000070330.13, intron 19 of 19)	-3945	ENSMUST00000193110.1	ENSMUSG00000040265	ENSMUST00000162330			Dnm3			protein_coding
e11ve16_common_1944	chr1	162004537	162005543	+	1.46775	NA	promoter-TSS (ENSMUST00000160555.1)	lncRNA-promoter-TSS (ENSMUST00000160555.1)	71	ENSMUST00000161583.1	ENSMUSG00000090260	ENSMUST00000160555			2810442N19Rik			lncRNA
e11ve16_common_1945	chr1	162015342	162015883	+	1.36465	NA	TTS (ENSMUST00000161539.1)	protein_coding-TTS (ENSMUST00000161539.1)	10440	ENSMUST00000160555.1	ENSMUSG00000090260	ENSMUST00000160555			2810442N19Rik			lncRNA
e11ve16_common_1946	chr1	162017068	162017268	+	0.22539	NA	TTS (ENSMUST00000160555.1)	lncRNA-TTS (ENSMUST00000160555.1)	11996	ENSMUST00000160555.1	ENSMUSG00000090260	ENSMUST00000160555			2810442N19Rik			lncRNA
e11ve16_common_1947	chr1	162036007	162037460	+	0.43211	NA	intron (ENSMUST00000159763.7, intron 5 of 8)	protein_coding-intron (ENSMUST00000070330.13, intron 16 of 19)	31561	ENSMUST00000160555.1	ENSMUSG00000090260	ENSMUST00000160555			2810442N19Rik			lncRNA
e11ve16_common_1948	chr1	162081625	162081884	+	0.54192	NA	intron (ENSMUST00000086074.11, intron 16 of 20)	protein_coding-intron (ENSMUST00000070330.13, intron 16 of 19)	6714	ENSMUST00000193239.1	ENSMUSG00000102994	ENSMUST00000193239			Gm37767			TEC
e11ve16_common_1949	chr1	162082718	162082937	+	0.61345	NA	intron (ENSMUST00000086074.11, intron 16 of 20)	protein_coding-intron (ENSMUST00000070330.13, intron 16 of 19)	5641	ENSMUST00000193239.1	ENSMUSG00000102994	ENSMUST00000193239			Gm37767			TEC
e11ve16_common_1950	chr1	162225736	162226065	+	2.02597	NA	TTS (ENSMUST00000139662.1)	lncRNA-TTS (ENSMUST00000139662.1)	2532	ENSMUST00000083582.1	ENSMUSG00000065516	ENSMUST00000083582			Mir214			miRNA
e11ve16_common_1951	chr1	162305385	162306052	+	0.07569	NA	intron (ENSMUST00000070330.13, intron 10 of 19)	protein_coding-intron (ENSMUST00000070330.13, intron 10 of 19)	7965	ENSMUST00000160173.1	ENSMUSG00000040265	ENSMUST00000162330			Dnm3			protein_coding
e11ve16_common_1952	chr1	162313527	162314059	+	1.57728	NA	promoter-TSS (ENSMUST00000160173.1)	protein_coding-promoter-TSS (ENSMUST00000160173.1)	-110	ENSMUST00000160173.1	ENSMUSG00000040265	ENSMUST00000162330			Dnm3			protein_coding
e11ve16_common_1953	chr1	162388848	162389125	+	0.69912	NA	intron (ENSMUST00000161894.1, intron 2 of 2)	protein_coding-intron (ENSMUST00000070330.13, intron 2 of 19)	18349	ENSMUST00000195768.1	ENSMUSG00000040265	ENSMUST00000162330			Dnm3			protein_coding
e11ve16_common_1954	chr1	162429874	162430151	+	0.02872	NA	intron (ENSMUST00000086074.11, intron 1 of 20)	protein_coding-intron (ENSMUST00000070330.13, intron 1 of 19)	-5423	ENSMUST00000161894.1	ENSMUSG00000040265	ENSMUST00000162330			Dnm3			protein_coding
e11ve16_common_1955	chr1	162477302	162478289	+	0.65061	NA	exon (ENSMUST00000070330.13, exon 1 of 20)	protein_coding-exon (ENSMUST00000070330.13, exon 1 of 20)	115	ENSMUST00000159707.1	ENSMUSG00000066752	ENSMUST00000159707			Gm10176			TEC
e11ve16_common_1956	chr1	162547795	162549007	+	0.90413	NA	promoter-TSS (ENSMUST00000176689.1)	protein_coding-promoter-TSS (ENSMUST00000176689.1)	121	ENSMUST00000159817.8	ENSMUSG00000026694	ENSMUST00000028017			Eef1aknmt			protein_coding
e11ve16_common_1957	chr1	162570437	162570694	+	0.76787	NA	promoter-TSS (ENSMUST00000050010.10)	protein_coding-promoter-TSS (ENSMUST00000050010.10)	-25	ENSMUST00000135241.7	ENSMUSG00000026696	ENSMUST00000050010			Vamp4			protein_coding
e11ve16_common_1958	chr1	162570803	162571502	+	0.68024	NA	promoter-TSS (ENSMUST00000155003.1)	protein_coding-promoter-TSS (ENSMUST00000155003.1)	-74	ENSMUST00000155003.1	ENSMUSG00000026696	ENSMUST00000050010			Vamp4			protein_coding
e11ve16_common_1959	chr1	162665029	162665973	+	0.5116	NA	Intergenic	Intergenic	-7282	ENSMUST00000169439.2	ENSMUSG00000091060	ENSMUST00000169439			Myocos			protein_coding
e11ve16_common_1960	chr1	162739557	162740965	+	0.55234	NA	promoter-TSS (ENSMUST00000182331.1)	protein_coding-promoter-TSS (ENSMUST00000182331.1)	89	ENSMUST00000182331.1	ENSMUSG00000040225	ENSMUST00000193937			Prrc2c			protein_coding
e11ve16_common_1961	chr1	162771586	162772697	+	0.24947	NA	Intergenic	Intergenic	-31585	ENSMUST00000182660.7	ENSMUSG00000040225	ENSMUST00000193937			Prrc2c			protein_coding
e11ve16_common_1962	chr1	162778166	162778370	+	0.97713	NA	Intergenic	Intergenic	30206	ENSMUST00000193508.1	ENSMUSG00000026692	ENSMUST00000144916			Fmo4			protein_coding
e11ve16_common_1963	chr1	162832204	162832796	+	0.87885	NA	exon (ENSMUST00000193766.1, exon 1 of 1)	protein_coding-exon (ENSMUST00000193766.1, exon 1 of 1)	-2027	ENSMUST00000136120.1	ENSMUSG00000040181	ENSMUST00000143902			Fmo1			protein_coding
e11ve16_common_1964	chr1	163009341	163009857	+	0.37447	NA	intron (ENSMUST00000195132.1, intron 2 of 3)	lncRNA-intron (ENSMUST00000195132.1, intron 2 of 3)	-25071	ENSMUST00000142759.1	ENSMUSG00000026691	ENSMUST00000142759			Fmo3			protein_coding
e11ve16_common_1965	chr1	163070715	163070953	+	0.37985	NA	intron (ENSMUST00000096608.4, intron 7 of 21)	protein_coding-intron (ENSMUST00000096608.4, intron 7 of 21)	14836	ENSMUST00000096608.4	ENSMUSG00000071890	ENSMUST00000096608			Mroh9			protein_coding
e11ve16_common_1966	chr1	163150200	163150916	+	0.11906	NA	Intergenic	Intergenic	32331	ENSMUST00000158549.1	ENSMUSG00000089174	ENSMUST00000158549			Gm22434			snoRNA
e11ve16_common_1967	chr1	163209252	163209471	+	0.94611	NA	Intergenic	Intergenic	-70995	ENSMUST00000172793.1	ENSMUSG00000092188	ENSMUST00000172793			Gm20471			lncRNA
e11ve16_common_1968	chr1	163311804	163312199	+	1.72446	NA	intron (ENSMUST00000174098.1, intron 1 of 1)	protein_coding-intron (ENSMUST00000027878.13, intron 1 of 3)	1667	ENSMUST00000174397.2	ENSMUSG00000026586	ENSMUST00000027878			Prrx1			protein_coding
e11ve16_common_1969	chr1	163312576	163312803	+	2.22172	NA	exon (ENSMUST00000027878.13, exon 1 of 4)	protein_coding-exon (ENSMUST00000027878.13, exon 1 of 4)	979	ENSMUST00000174397.2	ENSMUSG00000026586	ENSMUST00000027878			Prrx1			protein_coding
e11ve16_common_1970	chr1	163423443	163423871	+	0.12673	NA	Intergenic	Intergenic	-19988	ENSMUST00000045138.5	ENSMUSG00000040124	ENSMUST00000185299			Gorab			protein_coding
e11ve16_common_1971	chr1	163423982	163424184	+	0.02875	NA	Intergenic	Intergenic	-20414	ENSMUST00000045138.5	ENSMUSG00000040124	ENSMUST00000185299			Gorab			protein_coding
e11ve16_common_1972	chr1	163561200	163561915	+	0.09635	NA	Intergenic	Intergenic	-45820	ENSMUST00000185992.1	ENSMUSG00000101869	ENSMUST00000185992			Gm29500			lncRNA
e11ve16_common_1973	chr1	163724497	163725958	+	0.65407	NA	promoter-TSS (ENSMUST00000159679.7)	protein_coding-promoter-TSS (ENSMUST00000159679.7)	5	ENSMUST00000160495.1	ENSMUSG00000040113	ENSMUST00000159679			Mettl11b			protein_coding
e11ve16_common_1974	chr1	163779211	163780308	+	1.30236	NA	exon (ENSMUST00000027877.6, exon 1 of 20)	protein_coding-exon (ENSMUST00000027877.6, exon 1 of 20)	176	ENSMUST00000077642.11	ENSMUSG00000026585	ENSMUST00000077642			Kifap3			protein_coding
e11ve16_common_1975	chr1	163907396	163908021	+	1.1257	NA	intron (ENSMUST00000027877.6, intron 19 of 19)	protein_coding-intron (ENSMUST00000027877.6, intron 19 of 19)	-21392	ENSMUST00000161908.7	ENSMUSG00000026584	ENSMUST00000161908			Scyl3			protein_coding
e11ve16_common_1976	chr1	163910290	163910506	+	0.0621	NA	intron (ENSMUST00000027877.6, intron 19 of 19)	protein_coding-intron (ENSMUST00000027877.6, intron 19 of 19)	-18702	ENSMUST00000161908.7	ENSMUSG00000026584	ENSMUST00000161908			Scyl3			protein_coding
e11ve16_common_1977	chr1	163929457	163929988	+	1.0666	NA	promoter-TSS (ENSMUST00000027876.10)	protein_coding-promoter-TSS (ENSMUST00000027876.10)	-43	ENSMUST00000027876.10	ENSMUSG00000026584	ENSMUST00000161908			Scyl3			protein_coding
e11ve16_common_1978	chr1	163930195	163930783	+	0.85389	NA	intron (ENSMUST00000162234.1, intron 1 of 13)	protein_coding-intron (ENSMUST00000027876.10, intron 1 of 13)	684	ENSMUST00000162234.1	ENSMUSG00000026584	ENSMUST00000161908			Scyl3			protein_coding
e11ve16_common_1979	chr1	163994325	163994937	+	0.65817	NA	promoter-TSS (ENSMUST00000045694.13)	protein_coding-promoter-TSS (ENSMUST00000045694.13)	-90	ENSMUST00000162949.1	ENSMUSG00000041406	ENSMUST00000045876			BC055324			protein_coding
e11ve16_common_1980	chr1	163995116	163995502	+	0.55621	NA	promoter-TSS (ENSMUST00000045876.7)	protein_coding-promoter-TSS (ENSMUST00000045876.7)	420	ENSMUST00000045694.13	ENSMUSG00000041396	ENSMUST00000045694			Mettl18			protein_coding
e11ve16_common_1981	chr1	164138447	164139105	+	0.22453	NA	intron (ENSMUST00000162746.1, intron 9 of 15)	protein_coding-intron (ENSMUST00000162746.1, intron 9 of 15)	-2542	ENSMUST00000160000.1	ENSMUSG00000026580	ENSMUST00000162102			Selp			protein_coding
e11ve16_common_1982	chr1	164151335	164152027	+	0.33605	NA	promoter-TSS (ENSMUST00000086040.5)	protein_coding-promoter-TSS (ENSMUST00000086040.5)	-157	ENSMUST00000086040.5	ENSMUSG00000026579	ENSMUST00000086040			F5			protein_coding
e11ve16_common_1983	chr1	164184286	164184989	+	0.55335	NA	intron (ENSMUST00000086040.5, intron 9 of 24)	protein_coding-intron (ENSMUST00000086040.5, intron 9 of 24)	18058	ENSMUST00000162889.1	ENSMUSG00000089790	ENSMUST00000162889			Gm16588			processed_pseudogene
e11ve16_common_1984	chr1	164217659	164218528	+	0.11581	NA	intron (ENSMUST00000086040.5, intron 24 of 24)	protein_coding-intron (ENSMUST00000086040.5, intron 24 of 24)	-30953	ENSMUST00000044021.11	ENSMUSG00000040918	ENSMUST00000160773			Slc19a2			protein_coding
e11ve16_common_1985	chr1	164248580	164249040	+	1.03839	NA	promoter-TSS (ENSMUST00000044021.11)	protein_coding-promoter-TSS (ENSMUST00000044021.11)	-236	ENSMUST00000044021.11	ENSMUSG00000040918	ENSMUST00000160773			Slc19a2			protein_coding
e11ve16_common_1986	chr1	164249322	164249776	+	0.62506	NA	intron (ENSMUST00000169394.1, intron 1 of 4)	protein_coding-intron (ENSMUST00000044021.11, intron 1 of 5)	296	ENSMUST00000169394.1	ENSMUSG00000040918	ENSMUST00000160773			Slc19a2			protein_coding
[truncated: 33,326 more rows]
