# Supplementary material for: PI3K signaling specifies proximal-distal fate by driving a developmental gene regulatory network in SOX9+ mouse lung progenitors
Source: eLife. 2022 Aug 17;11:e67954. doi: 10.7554/eLife.67954 (PMC9427112; doi:10.7554/eLife.67954)
Supplement: Supplementary file 7. [file elife-67954-supp7.xlsx]

## Sheet: Sheet1
Supplemental File 7. ENCODE Data References
ENCODE Experiment Accession Number	Assay	Target	Biosample summary	Generating Lab
ENCSR387YSD	ChIP-seq (Histone ChIP-seq)	H3K4me1	Mus musculus C57BL/6 lung tissue embryo (16.5 days)	Bing Ren, UCSD
ENCSR295PFM	ChIP-seq (Histone ChIP-seq)	H3K4me3	Mus musculus C57BL/6 lung tissue embryo (16.5 days)	Bing Ren, UCSD
ENCSR140UEX	ChIP-seq (Histone ChIP-seq)	H3K27ac	Mus musculus C57BL/6 lung tissue embryo (16.5 days)	Bing Ren, UCSD
