# Supplementary material for: PI3K signaling specifies proximal-distal fate by driving a developmental gene regulatory network in SOX9+ mouse lung progenitors
Source: eLife. 2022 Aug 17;11:e67954. doi: 10.7554/eLife.67954 (PMC9427112; doi:10.7554/eLife.67954)
Supplement: Supplementary file 8. [file elife-67954-supp8.xlsx]

## Sheet: Sheet1
Supplemental File 8. RT-PCR Primer Sequences
Gene Target	Forward Sequence	Reverse Sequence
Sftpc	ACCCTGTGTGGAGAGCTACCA	TTTGCGGAGGGTCTTTCCT
Lamp3	ATATCCACCTTCAGGCCTTTG	CAGATGACGACCACGATGATT
Sftpb	TAGCCCTCTGCAGTGCTTCCAAA	AGCTGGGACATACAGACTGACACA
Abca3	TTCATCACCTGATGGCGGTGAAC	ACGCATGATGGCTTTGTCTACAGC
Sox2	TGCACATGGCCCAGCACT	TTCTCCAGTTCGCAGTCCAG
Sox9	AGACCAGTACCCGCATCTGCACAA	TCTCTTCTCGCTCTCGTTCAGCA
Scgb3a2	GCTGGTATCTATCTTTCTGCTGGTG	ACAACAGGGAGACGGTTGATGAGA
Gapdh	AGGTCGGTGTGAACGGATTTG	TGTAGACCATGTAGTTGAGGTCA
Foxj1	AGTGGATCACGGACAACTTCTGCT	TTCTCCCGAGGCACTTTGATGAAG
Scgb1a1	ATACCCTCCCACAAGAGACCAGGATA	ACACAGGGCAGTGACAAGGCTTTA
Scgb3a2	GCTGGTATCTATCTTTCTGCTGGTG	ACAACAGGGAGACGGTTGATGAGA
Tbp	CCTTGTACCCTTCACCAATGAC	ACAGCCAAGATTCACGGTAGA
